# Supplementary material
Source: PubMed Central journal article supplement (PMC4255481)

# THE LANCET

## **Supplementary appendix**

This appendix formed part of the original submission and has been peer reviewed. We post it as supplied by the authors.

Supplement to: Kassebaum NJ, Bertozzi-Villa A, Coggeshall MS, et al. Global, regional, and national levels and causes of maternal mortality during 1990–2013: a systematic analysis for the Global Burden of Disease Study 2013. *Lancet* 2014; published online May 2. [http://dx.doi.org/10.1016/S0140-6736\(14\)60696-6](http://dx.doi.org/10.1016/S0140-6736(14)60696-6).

## Appendix to Global, regional, and national levels and causes of maternal mortality during 1990-2013: a systematic analysis for the Global Burden of Disease Study 2013

This appendix provides more methodological detail on the maternal mortality estimation process, details on DisMod-MR 2.0 implementation, and country tables of numbers of deaths for five-year age-groups from 1990 to 2013.

### Table of Contents

|                                                                                                                                                                     |     |
|---------------------------------------------------------------------------------------------------------------------------------------------------------------------|-----|
| 1. Supplemental Methods: Maternal Mortality Estimation.....                                                                                                         | 2   |
| 1.1 Data.....                                                                                                                                                       | 2   |
| 1.2 Modeling.....                                                                                                                                                   | 3   |
| 1.3 Age-Specific Fertility Rate Estimation, ages 10-14.....                                                                                                         | 4   |
| 1.4 HIV Correction.....                                                                                                                                             | 4   |
| 1.5 CoDCorrect.....                                                                                                                                                 | 5   |
| 2. Supplemental Methods: Maternal Causes and Timing of Death.....                                                                                                   | 5   |
| 2.1 Data.....                                                                                                                                                       | 5   |
| 2.2 Modeling of timing and causes of maternal death.....                                                                                                            | 6   |
| 2.3 DisMod-MR 2.0 description and implementation.....                                                                                                               | 6   |
| 3. Supplemental Results.....                                                                                                                                        | 9   |
| 4. Supplemental References.....                                                                                                                                     | 9   |
| 5. Supplemental Tables and Figures.....                                                                                                                             | 11  |
| Appendix Table 1: Data sources used in CODEm.....                                                                                                                   | 11  |
| Appendix Figure 1: Flow chart of literature reviews for maternal mortality, causes of maternal mortality, and timing of maternal deaths.....                        | 43  |
| Appendix Table 2: ICD mapping of maternal causes of death.....                                                                                                      | 44  |
| Appendix Table 3: Causes of death partially reassigned to maternal causes.....                                                                                      | 51  |
| Appendix Table 4: Covariates used in CODEm.....                                                                                                                     | 52  |
| Appendix Table 5: CODEm sub-model performance.....                                                                                                                  | 53  |
| Appendix Table 6: Data sources used in DisMod.....                                                                                                                  | 101 |
| Appendix Table 7: Study level and country level covariates used to model aetiology and timing of maternal death in DisMod-MR 2.0.....                               | 115 |
| Appendix Table 8: Global and regional maternal deaths by cause and timing, 1990.....                                                                                | 116 |
| Appendix Table 9: Number of maternal death by underlying cause in 1990 for 188 countries.....                                                                       | 117 |
| Appendix Table 10: Number of maternal death by underlying cause in 2013 for 188 countries.....                                                                      | 125 |
| Appendix Figure 2: Maternal mortality ratio (MMR) data, CODEm results, HIV-correction and post-CoDCorrect model results by year for 188 countries, 1990 – 2013..... | 130 |

## 1. Supplemental Methods: Maternal Mortality Estimation

### 1.1 Data

Appendix Table 1 provides the sources of data used for each country for computation of the MMR. These have been identified through multiple mechanisms. As part of the GBD 2013, we systematically collate vital registration data reported by countries directly on their websites or through reports and reported to the World Health Organisation. Through the network of collaborators working on the GBD 2013 various other national sources have been identified and included in the study. 73 separate country surveys released up through March 1<sup>st</sup> 2014 have been analysed. Where microdata have not been reported, we have used results in DHS reports. We have searched websites, the Global Health Data Exchange and international compendiums such as IPUMS for census data that included questions on pregnancy related death. We updated the literature reviews conducted by Hogan et al and Lozano et al. We identified country-specific maternal mortality studies using the country name and “maternal mortality” or “maternal death” or “MMR” in PubMed. This search produced 793 results. The results were screened by title and abstract. After this screening a total of 88 articles were obtained in full text format for further review. Of those reviewed, 40 were excluded as not having relevant data to inform mortality estimation and 48 were extracted for inclusion in the database. A flow chart of this review is shown in Appendix Figure 1.

Appendix Table 2 tabulates all ICD-9 and ICD-10 codes as assigned to maternal conditions. Of note, ICD-10 but not ICD-9 includes late maternal deaths between 6 weeks and 1 year after termination.<sup>1</sup> MDG guidance for cross-country comparisons of the MMR recommends that all HIV-related deaths during pregnancy or within 6 weeks should be included in the MMR but the UN group estimating maternal mortality uses only 50% of these deaths in their estimation.<sup>2-4</sup> For vital registration and verbal autopsy data, maternal deaths are often misclassified as other underlying causes. In the GBD 2013, deaths assigned to causes that are unlikely to be underlying causes of death are reassigned using standardised algorithms.<sup>5</sup> The causes of death that are in part re-assigned to maternal causes are shown in Appendix Table 3.<sup>6</sup> DHS and RHS micro-data on sibling deaths that were pregnancy-related were re-analysed by single year using Gakidou-King weights to deal with potential survivor bias.<sup>7</sup> Where different DHS surveys provided data on reproductive aged deaths and the number that were pregnancy related for the same year, we have pooled results for that year to reduce stochastic measurement error. To deal with problems of zero counts in vital registration or sibling histories for a given age-group in a given year, we use a Bayesian noise reduction algorithm. For this algorithm, we assume a normal prior and a normal data likelihood. We estimate the normal prior for a given country series of data such as vital registration for a revision of the ICD or sequence of DHS surveys in a country by estimating a negative binomial for the fraction of deaths in each age-group due to maternal causes with dummy variables for age and year. These regressions are country specific so borrowing strength over age is only within a data type in a country. The variance of the prior,  $\tau^2$ , is estimated from the negative binomial regression taking into account the variance-covariance matrix of the regression coefficients. For the data variance, we use the Wilson approximation which provides an estimate of  $\sigma^2$  even in cases with a zero count of maternal deaths. The posterior estimate for each data points is

$$\text{Mean} = \left( \frac{\tau^2}{\tau^2 + \sigma^2} X + \frac{\sigma^2}{\tau^2 + \sigma^2} \mu \right)$$
$$\text{Variance} = \left( \frac{\tau^2 \sigma^2}{\tau^2 + \sigma^2} \right)$$

Where  $X$  is the mean of the data and  $\mu$  is the mean of the prior. This approach to noise reduction avoids the problem that zero counts in a ln rates model or a logit cause fraction model will be dropped from the regression and lead to upward bias in the estimates. This is particularly important in two settings: high-income countries with small numbers of maternal deaths and in the analysis of sibling history data where for any given age-group in any given year the number of deaths reported in the survey that are pregnancy-related or the number of deaths from all causes in that age group may be small.

## 1.2 Modeling

Following Lozano et al and the GBD 2010, we use CODEm to model maternal mortality.<sup>8,9</sup> The Cause of Death Ensemble Model (CODEm) is based on five general principles: identifying all available data, maximising the comparability and quality of the dataset, developing a diverse set of plausible models, assessing the predictive validity of each plausible individual model and of ensemble models, and choosing the model or ensemble model with the best performance in out-of-sample predictive analysis.<sup>10</sup> Specifically, CODEm explores a large variety of possible models to estimate trends in causes of death. Possible models are identified using a covariate selection algorithm that yields many plausible combinations of covariates which are then run through four model classes. The model classes include mixed effects linear models and spatiotemporal GPR models for cause fractions and death rates. All models for each cause of death are then assessed using out-of-sample predictive validity and combined into an ensemble with optimal out-of-sample predictive performance.

We first identified a range of plausible covariates for maternal conditions based on the published literature. We divided these covariates into three groups based on the strength of epidemiological evidence: 1) Level 1 covariates for which there is strong evidence and a biologically plausible pathway, 2) Level 2 covariates for which there is some evidence but with a less direct causal pathway, and 3) Level 3 covariates where there is general correlation evidence for a relationship as observed in previous time series or cross-sectional studies. Appendix Table 4 lists the candidate covariates, priors, and levels for the overall maternal conditions CODEm model based on physician judgment and literature review of risk factors related to maternal conditions.

For a covariate to be included, we needed to have a comparable, complete time series for 1980 - 2010. Transformations were performed based on the observed relationship between rates or cause fractions and the covariate of interest untransformed or transformed – if the relationship between the transformed covariate and the rate or cause fraction was more linear than the relationship between the untransformed covariate, the transformation was included. We used the natural log transformation of total fertility rate, neonatal death rate, and lag-distributed income as the result of such analyses. On the basis of this published work and previous theory, we selected age-specific fertility rate (ASFR), log transformed total fertility rate, in-facility delivery, skilled birth attendance, antenatal care visit coverage, education, HIV prevalence, log-transformed neonatal death rate, malnutrition levels, log transformed lag-distributed income (LDI) per capita and health system access (an aggregate measure of hospital beds per capita, in-facility deliveries, vaccination coverage, and other health system indicators produced by IHME).<sup>11-15</sup>

In the first step, we run regressions for all possible combinations of Level 1 covariates. We run regressions for models where the dependent variable is the rate in logarithmic scale by age and models where the dependent variable is logit cause fraction by age. All models, where the signs for all covariates in that model are in the expected direction and the coefficient is significant at the  $p < 0.05$  level, are retained. Level two and three covariates are then added to these models using a forward stepwise technique which is not order dependent. This is achieved by starting the forward stepwise evaluation for each base model over for each category two covariate. Models which are subsets of other models at levels two or three were dropped. A total of 325 unique combinations of covariates (114 for cause fractions, 211 for death rates) were kept where the coefficient for a covariate was significant at the  $p < 0.05$  level and in the expected direction. Counting the covariates' being run as both simple mixed effects and spatiotemporal models, this resulted in a total pool of 650 retained component models, out of 15 312 component models tested.

As per Lozano et al, the ability of each of these models to make accurate predictions is formally evaluated.<sup>8</sup> We created 50 train-test-test splits. For each of these datasets, we randomly assign 70% of the data to the train set, 15% to the test 1 set, and the last 15% to test 2. The assignment of the data to train and test is implemented so that the pattern of holding out the data for the test datasets mimics the pattern of missingness in the full dataset. For each train dataset, we re-estimate each of the proposed models including both the linear model and the spatial-temporal model. We use the results of the models estimated on the training data alone to predict for the first test set. The test data have not been included in the model estimation; the performance of each model is therefore being evaluated out-of-sample. In this way, the out-of-sample predictions for the test set are a fair test of how each model will perform for maternal mortality where the data are sparse or missing.

Predictive validity was evaluated using three metrics. First, we evaluated how well each model predicts age-specific death rates using the RMSE of the natural log of the death rate. Log death rates are comparable across age-groups so that we were able to pool results from model performance across age groups with quite different underlying rates. Second, we also want models that predict accurate trends. To do this, for the test data, we compared the predicted slope for every time interval from 1 to 5 years and compared it to the slope from the held out data. We computed the RMSE for the predicted slope. Finally, we also wanted models that generate plausible prediction intervals so we computed the percent of the data in the test set included in the 95% prediction interval. The prediction interval was based both on the uncertainty in the predicted death rate and the data variance for each observation.

Following Lozano et al, the best overall results in terms of RMSE and trend were yielded by the ensemble model with a Psi value of 1.22.<sup>8</sup> This value of Psi results in draws ranging from 180 for the top performing model to 0 for the worst performer, as detailed in Appendix Table 5. For comparison it also shows the results for the best single model. The best component model was a spatiotemporal model on the logit of the cause fractions, with education (years per capita), total fertility rate (log-transformed) and lag distributed income per capita (log-transformed) as the component covariates. The ensemble model has slightly better predictive validity on both RMSE and the trend test, particularly out-of-sample. In addition, the coverage of the ensemble model is larger than that of the component model. This finding is in line with the published literature on ensemble models which in general tend to have more accurate uncertainty intervals. We should note, however, that the coverage of the uncertainty interval is in excess of 98.3% suggesting that we have overestimated uncertainty intervals.

Models were initially run with no outliers marked. Based on the estimates produced by these initial models and corresponding combined RMSE and trend test scores from that ensemble model, we carefully examined all data from each site-year to look for outliers. Criteria for considering data to be outliers were as follows: 1) The source reported maternal deaths systematically and significantly lower than other data sources for the same site-year; 2) Individual data points that, because they were the sole data from that site-year, were seen to impart obvious inconsistencies in time or age trend to the model; and 3) Data from selected age groups or years where despite the VR and DHS smoothing algorithms had implausible cause fractions or death rates.

### 1.3 Age-Specific Fertility Rate Estimation, ages 10-14

Age-specific fertility rate estimates were available from the United Nations Population Division (UNPOP) for ages 15-49. To estimate ASFR for the 10-14 age group, we set fertility in ages 5-9 equal to 0. Then fit country-year specific local polynomials of degree 1 with a Gaussian kernel on fertility rate across ages.<sup>16</sup> We then used a direct plug-in method to choose the bandwidth and if this fails to produce a bandwidth estimate, set the bandwidth equal to 2.<sup>17</sup> We used the resulting estimates for ages 10-14 only and retain the original point estimates for the other ages. If this local polynomial procedure results in negative ASFR, then we instead use a linear interpolation between the nearest ages. After all of this, we adjust ASFR for ages 10-14 by adjusting for menarchal age as determined by three recent studies.<sup>18-20</sup>

### 1.4 HIV Correction

As noted in the body of the text, we have made no changes to the approach for dealing with misclassification of maternal deaths in vital registration data. We have, however, modified the method used for estimating the number of maternal deaths associated with HIV. Many studies have failed to find increased mortality in HIV+ pregnant mothers, but those who have advanced HIV are known to have increased baseline mortality. Previously we have not distinguished between deaths in HIV+ women that were caused by pregnancy and those for which the pregnancy was incidental to their death. In order to more explicitly quantify the contribution of pregnancy to death in HIV+ women, and therefore more accurately estimate the maternal death count, we completed two additional analyses. First, we determined the population attributable fraction (PAF) of HIV to pregnancy-related death. Second, we determined the proportion of pregnancy-related deaths in HIV-positive persons that are aggravated by pregnancy and are therefore by definition maternal deaths.

$$PAF = \frac{p * (RR - 1)}{1 + p * (RR - 1)}$$

Where *PAF* is the population attributable fraction, *p* denotes the prevalence of HIV in pregnancy, and *RR* is relative risk of mortality in HIV+ vs HIV- pregnant females.

For the first part of the analysis, we used the paper published by Calvert and Ronsmans to identify sources that could inform Step 1 of our HIV-correction analysis. We independently reviewed each of the component studies in Calvert and Ronsmans' review and extracted data directly, not from the systematic review paper. We only identified one additional study that was not used in Calvert and Ronsmans' analysis. We have, however, not used all the studies included in that review. Specific details are as follows: 1) Figueroa-Damian, et.al was excluded for not including any postpartum deaths at all. 2) In the case of Ryder, et. al. and Zvandasara, et.al. we excluded those deaths > 12 months after delivery. 3) We excluded the results from Chilongozi, et. al. from the site that did not include any HIV negative patients. 4) Leroy, et.al. was not in the bibliography. We could not locate it for review so it was excluded. 5) Kourtis et. al. was extracted with adjustment of the denominator based on the average number of hospitalisations per delivery in each group. 6) Ticconi, et. al. was excluded for being both non-representative and including subgroup data from mothers with malaria infection. A total 21 sources were included in our analysis of the increased mortality risk of HIV+ versus HIV- women in pregnancy.<sup>21</sup> We performed DerSimonian-Laird random effects meta-analysis to derive a pooled estimate of *RR* of death during pregnancy given HIV positivity.<sup>22</sup> The pooled effect size was 6.40 (95% UI 3.98 – 10.29) which was then used to calculate an HIV *PAF* for each country, age group and year. Prevalence of HIV in pregnancy estimates came from the UNAIDS Spectrum database, which incorporates observed age-dependent differences in fertility amongst HIV positive women to predict HIV prevalence in pregnancy. Spectrum predicts HIV-positive 15-19 year olds have fertility of 1.2 times that of HIV-negative. For ages 20-24 the ratio is 0.76, decreasing eventually to 0.47 in 45–49 year olds.

The country-year-age group-specific *PAF* was applied to the entire envelope of maternal deaths that was estimated by CODEm. In order to determine the proportion of those HIV-related deaths that were attributable to maternal causes, we performed a second systematic literature review. This time we sought evidence for the excess mortality risk of pregnancy in those women who are already HIV positive. Most studies have failed to find such an effect, but most also did not stratify their study population by stage of HIV or ART status. Only two studies did this stratification, with a pooled effect size of 1.13 (95% UI 0.73 – 1.77).<sup>23,24</sup>

### 1.5 CoDCorrect

To ensure consistent our estimates of maternal mortality are consistent with all other causes for every country, age, sex and year group, we employed a simple algorithm called CoDCorrect. At the level of each draw from the posterior distribution of each cause, we proportionally rescaled every cause such that the sum of the cause-specific estimates equaled the number of deaths from all causes generated from the demographic analysis.<sup>25</sup>

## 2. Supplemental Methods: Maternal Causes and Timing of Death

### 2.1 Data

We modeled aetiology of maternal death for six causes in GBD 2010: maternal haemorrhage, maternal sepsis, hypertensive disorders of pregnancy, obstructed labor, abortion, and “other maternal conditions”. For this analysis we have expanded to nine causes including the first five above as well as “other direct maternal conditions”, “other indirect maternal conditions”, late maternal death and HIV. Our general approach was the same as used for GBD 2010. In that analysis, we used data from a combination of vital registration, verbal autopsy, burial, census, sibling history, and surveillance sources. We updated these datasets with systematic literature review, searching for maternal mortality studies by cause with the terms “maternal mortality”, “maternal death”, “MM”, or “confidential enquiry,” or “obstetric” or “pregnancy” and “aetiology” or “cause pattern” and “death” or “mortality.” The cause-specific literature review yielded 1217 results. 171 were reviewed in full text. A total of 110 were excluded for not having relevant data. 61 articles were found to have relevant data and were included in the database.

We have not previously estimated timing of maternal death, but given the relevance to policy and planning of potential interventions, decided to include it in this analysis. Vital registration and census data collection systems do not collate this sort of data, so we relied on systematic literature review. We used the terms “maternal mortality” to search for studies on the timing of maternal deaths in PubMed, and 8076 studies were reviewed. 629 articles were obtained in full text form and reviewed for inclusion. 142 were found to have data on the timing of maternal deaths, and were extracted for inclusion, while 487 others lacked relevant data and were excluded from analysis.

A flow chart illustrating both of these literature reviews is illustrated in Appendix Figure 1.

All vital registration and sample registration data that provided ICD-coded detail for causes of maternal mortality were included as well. To increase the precision of input data, we combined each two year period (e.g. 1980 and 1981) into a single datum, we excluded any site-year where the total number of maternal deaths was less than ten, and excluded those data with a maternal cause-fraction of less than 3% or greater than 45%, respectively the highest and lowest cause fractions found in the literature for any subcause. This processing resulted in a total of 943 distinct site-years (1886 site-years prior to pooling) of data available for modeling causes of maternal death.

## 2.2 Modeling of timing and causes of maternal death

We used DisMod-MR 2.0 to model the data on the causes and timing of maternal death. The fundamentals of DisMod-MR 2.0 are outlined below. The study-level covariates and country-level covariates used for each model are shown in Appendix Table 7.

## 2.3 DisMod-MR 2.0 description and implementation

DisMod-MR was developed for the GBD2010 study to deal with the many challenges in estimating the prevalence of non-fatal health outcomes and risk factor exposures. The information gathered by systematic reviews of published studies, grey literature sources and survey data varied tremendously for each outcome of interest in terms of the volume of data, methods used to collect the data, geographical and temporal coverage, and the type of epidemiological parameter. The goal was to find the true variation in the occurrence of diseases and risk factors for every country and over time.

Estimates of prevalence (or any of the other epidemiological parameters of interest: incidence, remission, duration and risk of mortality) for the same populations often varied by much more than would be expected based on sampling error. Differences in data collection methods such as sampling design, case definitions, measurement instruments and implementation issues, contributed to large non-sampling error. There are two approaches to deal with this heterogeneity. One could set criteria for the optimal measurement of each disease parameter of interest and include only those studies that meet that high standard. This would make measurements comparable but would leave out the vast majority of information available. In GBD, the preferred approach is to make use of all available data that meets a minimum standard of acceptable quality and address major differences in measurement methods by adjusting data for any systematic bias introduced by a study quality characteristic relative to a chosen reference value. This was done by identifying for each disease or risk factor exposure the important study characteristics that can help explain the variation in measurements and flag data points that deviate from the chosen, optimal, reference value with a covariate. DisMod-MR then estimated a coefficient for each chosen study covariate and adjusted the data accordingly.

To help make estimates for countries and time periods for which little or no data were available, DisMod-MR would predict based on country characteristics and random effects on super-region, region and country. For this purpose a database of country covariates for 93 topic areas and 242 variants thereof was created. Missing data were filled in using Gaussian process or space-time regression methods to ensure a complete set of values for each covariate for

every country and every year from 1980 to present. If no country covariates were specified and no data were available, a country estimate would revert to the average of a region, super-region or the world.

DisMod-MR dealt with any specification of age ranges by which data were available to produce estimates by the 20 standard GBD age groups. It also allowed the user to add strong prior knowledge on the age at onset or age pattern of prevalence or incidence such as restricting the occurrence of pre-menstrual syndrome to fertile ages or stipulating that there are no cases of Parkinson's disease before age 30. All these functions were new in DisMod-MR compared to earlier DisMod version used in previous GBD studies which required an analyst to choose one particular data source for a given disease parameter rather than being able to evaluate all available data. Hence the tool was renamed DisMod-MR, the suffix indicating the important meta-regression component. DisMod-MR also accommodated the main functionality of the earlier DisMod tools, i.e. confronting the data from different disease parameters and forcing consistency between these based on differential equations that determine the flow of cases in a stable population between those disease-free and prevalent cases of disease (through incidence or remission) and those in either category that die from other causes (other-cause mortality) and the disease of interest (cause-specific mortality).

To accommodate all functions, DisMod-MR was designed as a Bayesian meta-regression tool using a generalised negative binomial model with fixed effects on age, study and country level covariates as well as random intercepts for country, region and super-region. Greater detail on DisMod-MR has been published in a web-appendix to the paper on non-fatal health outcomes in GBD2010.<sup>26</sup>

While DisMod-MR successfully addressed many of the major challenges in the estimation of non-fatal health outcomes and risk factor exposures it had a number of drawbacks which we have tried to solve for GBD 2013 by creating an updated version of the tool, DisMod-MR 2.0. The biggest drawback was the computing time required. Each disease model needed to run between 4 and 24 hours on a large computer cluster to produce results for all countries and three time periods (1990, 2005 and 2010). Moreover because of computational constraints a decision had to be made to restrict the consistency checks at the level of 21 regions only. To make country estimates, the relevant fixed effects on study and country covariates and the random effects for each country were applied. While this produced defensible estimates of prevalence it did not guarantee coherence between prevalence and other disease parameters such as incidence and excess mortality rates at the country level.

The code for DisMod-MR 2.0 was rewritten and optimised to run up to 50 times faster than DisMod-MR. A decision was also made to shift to an offset log-normal rather than a negative binomial model as this is easier to implement and because predictive validity tests carried out in DisMod-MR indicated that the statistical properties the two types of models were at least equivalent.

The much faster running time of the core computational engine in DisMod-MR 2.0 allows us to better evaluate all the data through a geographical cascade of four levels. At first, all the world's data are evaluated to estimate the fixed effects on age, sex, study level and country level covariates as well as a first pass at estimating the random effects for countries, regions and super-regions. The outputs of the global level are then used as prior information for the next, super-region level of the cascade. A single age pattern for both sexes and all years of interest is created with uncertainty bounds. All data points that are marked as pertaining to both sexes or flagged with a covariate for a study characteristic (e.g. a less than optimal case definition or a low response rate) are adjusted at this stage to reflect what the likely value would have been if the study had specified sex and/or used the reference study characteristic. The data are also split up between super-regions and, optionally, by time period and sex. Using the global prior and the adjusted data values for each super-region are re-estimated using the same core computational engine. While there is flexibility whether to re-assess fixed effects on sex or study level covariates at this level, the default option is to adjust the data by the sex and study-level covariates after the global level fit, only. At each successive level of the cascade the fixed effects on country-level covariates are re-evaluated and centered on the average of values for the countries that make up a super-region or region. Similarly, random effects are re-evaluated



for just the countries in a given geography. It logically follows that no fixed or random effects are re-evaluated at country level. After fitting the model to each of the super-regions, the results are fed as priors to the region-specific fits and finally, region fits are used as a prior when modelling a country's results for a particular time period.

A new interface was created to draw relevant data for each disease, sequela or risk factor to be modelled, to apply all the default and optional settings and to visualise results. The analyst has a lot of choice to set model parameters to suit any given disease or risk factor of interest. There is a setting to define the age mesh point at which DisMod-MR 2.0 does its calculations. The default setting is to use 21 age mesh points that define the 20 GBD standard age groups. For each study-level and country-level covariate the analyst can set a reference value and upper and lower values for the coefficients. The inclusion of cause-specific mortality rates by age and sex from GBD's mortality estimates is optional. An alternative method of informing a model with mortality data is by using the log of the age-standardised mortality rate as a country-level covariate. Other examples of the basic settings include a value for the parameter that determines the amount of smoothing over the age curve and is denoted by Greek letter 'xi' ( $\xi$ ); the value of the offset for the lognormal ('eta' or  $\eta$ ) for which the default setting is at one per cent of the median of available data values for a parameter or 0.0001 in case there are no data for that parameter; and a range of values for the parameter 'zeta' ( $\zeta$ ) that determines how much 'noise' the analyst allows DisMod-MR 2.0 to estimate for a parameter. The latter function is useful to the analyst. When DisMod-MR 2.0 estimates zeta close to the upper threshold it indicates there is a lot of noise in the data or it may be an indication that there are data entry errors that deserve attention.

Analysts have the choice of using a Gaussian, log-Gaussian, Laplace or Log-Laplace likelihood function in DisMod-MR 2.0. The default log-Gaussian equation for the data likelihood is:

$$-\log[p(y_j|\Phi)] = \log(\sqrt{2\pi}) + \log(\delta_j + s_j) + \frac{1}{2} \left( \frac{\log(a_j + \eta_j) - \log(m_j + \eta_j)}{\delta_j + s_j} \right)^2$$

where,  $y_j$  is a 'measurement value' (i.e. data point);  $\Phi$  denotes all model random variables;  $\eta_j$  is the offset value, eta, for a particular 'integrand' (prevalence, incidence, remission, excess mortality rate, with-condition mortality rate, cause-specific mortality rate, relative risk or standardised mortality ratio) and  $a_j$  is the adjusted measurement for data point  $j$ , defined by:

$$a_j = e^{(-u_j - c_j)} y_j$$

where  $u_j$  is the total 'area effect' (i.e. the sum of the random effects at three levels of the cascade: super-region, region and country) and  $c_j$  is the total covariate effect (i.e. the mean combined fixed effects for sex, study level and country level covariates), defined by:

$$c_j = \sum_{k=0}^{K[I(j)]-1} \beta_{I(j),k} \hat{X}_{k,j}$$

with standard deviation

$$s_j = \sum_{l=0}^{L[I(j)]-1} \zeta_{I(j),l} \hat{Z}_{k,j}$$

where  $k$  denotes the mean value of each data point in relation to a covariate (also called x-covariate);  $I(j)$  denotes a data point for a particular integrand,  $j$ ;  $\beta_{I(j),k}$  is the multiplier of the  $k^{\text{th}}$  x-covariate for the  $i^{\text{th}}$  integrand;  $\hat{X}_{k,j}$  is the covariate value corresponding to the data point  $j$  for covariate  $k$ ;  $l$  denotes the standard deviation of each data point

in relation to a covariate (also called z-covariate);  $\zeta_{l(j),k}$  is the multiplier of the  $l^{\text{th}}$  z-covariate for the  $i^{\text{th}}$  integrand; and  $\delta_j$  is the standard deviation for adjusted measurement  $j$ , defined by:

$$\delta_j = \log[y_j + e^{(-u_j - c_j)}\eta_j + c_j] - \log[y_j + e^{(-u_j - c_j)}\eta_j]$$

Where  $m_j$  denotes the model for the  $j^{\text{th}}$  measurement, not counting effects or measurement noise and defined by:

$$m_j = \frac{1}{B(j)-A(j)} \int_{A(j)}^{B(j)} I_j(a) da$$

where  $A(j)$  is the lower bound of the age range for a data point;  $B(j)$  is the upper bound of the age range for a data point; and  $I(j)$  denotes the function of age corresponding to the integrand for data point  $j$ .

### 3. Supplemental Results

Total maternal deaths by underlying cause for 188 countries in 2013 are shown in Appendix Table 8.

Appendix Figure 2 illustrates input data and CODEm model results before and after HIV correction for 188 countries.

### 4. Supplemental References

- 1 World Health Organisation. International statistical classification of diseases and related health problems, 10th revision, 2nd edition. Geneva, World Health Organisation, 2004 [http://www.who.int/classifications/icd/ICD-10\\_2nd\\_ed\\_volume2.pdf](http://www.who.int/classifications/icd/ICD-10_2nd_ed_volume2.pdf) (accessed 3 Feb2014).
- 2 Trends in Maternal Mortality: 1990 to 2010. WHO, UNICEL, UNFPA and The World Bank estimates. , World Health Organisation, 2012 [http://www.unfpa.org/webdav/site/global/shared/documents/publications/2012/Trends\\_in\\_maternal\\_mortality\\_A4-1.pdf](http://www.unfpa.org/webdav/site/global/shared/documents/publications/2012/Trends_in_maternal_mortality_A4-1.pdf) (accessed 31 Jan2014).
- 3 United Nations Development Group. Indicators for Monitoring the Millennium Development Goals: Definitions, Rationale, Concepts, and Sources. New York, United Nations, 2003 [http://www.undp.org/content/dam/aplaws/publication/en/publications/poverty-reduction/poverty-website/indicators-for-monitoring-the-mdgs/Indicators\\_for\\_Monitoring\\_the\\_MDGs.pdf](http://www.undp.org/content/dam/aplaws/publication/en/publications/poverty-reduction/poverty-website/indicators-for-monitoring-the-mdgs/Indicators_for_Monitoring_the_MDGs.pdf) (accessed 1 Feb2014).
- 4 Birnbaum JK, Murray CJ, Lozano R. Exposing misclassified HIV/AIDS deaths in South Africa. *Bull World Health Organ* 2011; **89**: 278–85.
- 5 Naghavi M, Makela S, Foreman K, O'Brien J, Pourmalek F, Lozano R. Algorithms for enhancing public health utility of national causes-of-death data. *Popul Health Metr* 2010; **8**: 9.
- 6 Naghavi et al. Global, Regional, and National Levels of Age-Specific Mortality and 266 Causes of Death, 1990–2013: A Systematic Analysis. 2014.
- 7 Gakidou E, King G. Death by survey: estimating adult mortality without selection bias from sibling survival data. *Demography* 2006; **43**: 569–85.
- 8 Lozano R, Wang H, Foreman KJ, et al. Progress towards Millennium Development Goals 4 and 5 on maternal and child mortality: an updated systematic analysis. *The Lancet* 2011; **378**: 1139–65.
- 9 Lozano R, Naghavi M, Foreman K, et al. Global and regional mortality from 235 causes of death for 20 age groups in 1990 and 2010: a systematic analysis for the Global Burden of Disease Study 2010. *The Lancet* 2012; **380**: 2095–128.

- 10 Foreman KJ, Lozano R, Lopez AD, Murray CJ. Modeling causes of death: an integrated approach using CODEm. *Popul Health Metr* 2012; **10**: 1.
- 11 Trussell J, Pebley AR. The potential impact of changes in fertility on infant, child, and maternal mortality. *Stud Fam Plann* 1984; **15**: 267–80.
- 12 Hogan MC, Foreman KJ, Naghavi M, *et al.* Maternal mortality for 181 countries, 1980-2008: a systematic analysis of progress towards Millennium Development Goal 5. *Lancet* 2010; **375**: 1609–23.
- 13 Shen C, Williamson JB. Maternal mortality, women's status, and economic dependency in less developed countries: a cross-national analysis. *Soc Sci Med* 1982 1999; **49**: 197–214.
- 14 Campbell OMR, Graham WJ, Lancet Maternal Survival Series steering group. Strategies for reducing maternal mortality: getting on with what works. *Lancet* 2006; **368**: 1284–99.
- 15 Rush D. Nutrition and maternal mortality in the developing world. *Am J Clin Nutr* 2000; **72**: 212S–240S.
- 16 Wand MP, Jones MC. Kernel smoothing. London; New York, Chapman & Hall, 1995.
- 17 Ruppert D, Sheather SJ, Wand MP. An Effective Bandwidth Selector for Local Least Squares Regression. *J Am Stat Assoc J Am Stat Assoc* 1995; **90**: 1257–70.
- 18 Anderson SE, Must A. Interpreting the continued decline in the average age at menarche: results from two nationally representative surveys of U.S. girls studied 10 years apart. *J Pediatr* 2005; **147**: 753–60.
- 19 Talma H, Schönbeck Y, van Dommelen P, Bakker B, van Buuren S, Hirasing RA. Trends in menarcheal age between 1955 and 2009 in the Netherlands. *PLoS One* 2013; **8**: e60056.
- 20 Demerath EW, Towne B, Chumlea WC, *et al.* Recent decline in age at menarche: The Fels Longitudinal Study. *Am J Hum Biol* 2004; **16**: 453–7.
- 21 Calvert C, Ronsmans C. The contribution of HIV to pregnancy-related mortality: a systematic review and meta-analysis. *AIDS Lond Engl* 2013; **27**: 1631–9.
- 22 DerSimonian R, Laird N. Meta-analysis in clinical trials. *Control Clin Trials* 1986; **7**: 177–88.
- 23 Matthews LT, Kaida A, Kanters S, *et al.* HIV-infected women on antiretroviral treatment have increased mortality during pregnant and postpartum periods. *AIDS Lond Engl* 2013; **27 Suppl 1**: S105–112.
- 24 Westreich D, Maskew M, Evans D, Firnhaber C, Majuba P, Sanne I. Incident pregnancy and time to death or AIDS among HIV-positive women receiving antiretroviral therapy. *PLoS One* 2013; **8**: e58117.
- 25 Wang H, Dwyer-Lindgren L, Lofgren KT, *et al.* Age-specific and sex-specific mortality in 187 countries, 1970-2010: a systematic analysis for the Global Burden of Disease Study 2010. *Lancet* 2012; **380**: 2071–94.
- 26 Vos T, Flaxman AD, Naghavi M, *et al.* Years lived with disability (YLDs) for 1160 sequelae of 289 diseases and injuries 1990-2010: a systematic analysis for the Global Burden of Disease Study 2010. *Lancet* 2012; **380**: 2163–96.

## 5. Supplemental Tables and Figures

Appendix Table 1: Data sources used in CODEm

| <b>Appendix Table 1: Data source list of maternal mortality data sources used in the GBD 2013.</b>                                              |               |                                                                                                                                                                                                                                                                                  |        |    |     |    |    |
|-------------------------------------------------------------------------------------------------------------------------------------------------|---------------|----------------------------------------------------------------------------------------------------------------------------------------------------------------------------------------------------------------------------------------------------------------------------------|--------|----|-----|----|----|
| SR/BMS= surveillance, and burial or mortuary surveillance. VR= Vital Registration. SIB= Sibling History. SC= Survey/Census. VA= Verbal Autopsy. |               |                                                                                                                                                                                                                                                                                  |        |    |     |    |    |
| Country                                                                                                                                         | Source number | Source                                                                                                                                                                                                                                                                           | SR BMS | VR | SIB | SC | VA |
| Afghanistan                                                                                                                                     | 01 - AFG      | Bartlett LA, Mawji S, Whitehead S, Crouse C, Dalil S, Ionete D, Salama P. Where giving birth is a forecast of death: maternal mortality in four districts of Afghanistan, 1999-2002. Lancet. 2005; 365(9462): 864-70.                                                            |        |    |     |    | X  |
| Afghanistan                                                                                                                                     | 02 - AFG      | Central Statistics Organisation (Afghanistan), ICF Macro, Indian Institute of Health Management Research (IIHMR), Ministry of Public Health (Afghanistan), WHO Regional Office for the Eastern Mediterranean. Afghanistan Special Demographic and Health Survey 2010. ICF Macro. |        |    | X   |    | X  |
| Albania                                                                                                                                         | 01 - ALB      | Albania Institute of Statistics (INSTAT). Albania Vital Registration - Causes of Death 1993-2010.                                                                                                                                                                                |        | X  |     |    |    |
| Albania                                                                                                                                         | 02 - ALB      | World Health Organisation (WHO). WHO Mortality Database Version July 2012. Geneva, Switzerland: World Health Organisation (WHO), 2012.                                                                                                                                           |        | X  |     |    |    |
| Algeria                                                                                                                                         | 01 - DZA      | National Institute of Public Health (Algeria). Study of Causes of Death, Transition and Health Impact in North Africa (TAHINA) Project 2002.                                                                                                                                     | X      |    |     |    |    |
| Antigua and Barbuda                                                                                                                             | 01 - ATG      | World Health Organisation (WHO). WHO Mortality Database Version February 2014. Geneva, Switzerland: World Health Organisation (WHO), 2014.                                                                                                                                       |        | X  |     |    |    |
| Antigua and Barbuda                                                                                                                             | 02 - ATG      | World Health Organisation (WHO). WHO Mortality Database Version July 2012. Geneva, Switzerland: World Health Organisation (WHO), 2012.                                                                                                                                           |        | X  |     |    |    |
| Argentina                                                                                                                                       | 01 - ARG      | Rosenstein MG, Romero M, Ramos S. Maternal Mortality in Argentina: A Closer Look at Women Who Die Outside of the Health System. Matern Child Health J. 12(4): 519-24.                                                                                                            |        |    |     |    | X  |
| Argentina                                                                                                                                       | 02 - ARG      | World Health Organisation (WHO). WHO Mortality Database Version February 2014. Geneva, Switzerland: World Health Organisation (WHO), 2014.                                                                                                                                       |        | X  |     |    |    |
| Argentina                                                                                                                                       | 03 - ARG      | World Health Organisation (WHO). WHO Mortality Database Version July 2012. Geneva, Switzerland: World Health Organisation (WHO), 2012.                                                                                                                                           |        | X  |     |    |    |
| Armenia                                                                                                                                         | 01 - ARM      | World Health Organisation (WHO). WHO Mortality Database Version February 2014. Geneva, Switzerland: World Health Organisation (WHO), 2014.                                                                                                                                       |        | X  |     |    |    |
| Armenia                                                                                                                                         | 02 - ARM      | World Health Organisation (WHO). WHO Mortality Database Version July 2012. Geneva, Switzerland: World Health Organisation (WHO), 2012.                                                                                                                                           |        | X  |     |    |    |
| Australia                                                                                                                                       | 01 - AUS      | World Health Organisation (WHO). WHO Mortality Database Version February 2014. Geneva, Switzerland: World Health Organisation (WHO), 2014.                                                                                                                                       |        | X  |     |    |    |
| Australia                                                                                                                                       | 02 - AUS      | World Health Organisation (WHO). WHO Mortality Database Version July 2012. Geneva, Switzerland: World Health Organisation (WHO), 2012.                                                                                                                                           |        | X  |     |    |    |

|            |          |                                                                                                                                                                                                                                                                                                                                                                                 |  |   |   |   |   |
|------------|----------|---------------------------------------------------------------------------------------------------------------------------------------------------------------------------------------------------------------------------------------------------------------------------------------------------------------------------------------------------------------------------------|--|---|---|---|---|
| Austria    | 01 - AUT | World Health Organisation (WHO). WHO Mortality Database Version February 2014. Geneva, Switzerland: World Health Organisation (WHO), 2014.                                                                                                                                                                                                                                      |  | X |   |   |   |
| Austria    | 02 - AUT | World Health Organisation (WHO). WHO Mortality Database Version July 2012. Geneva, Switzerland: World Health Organisation (WHO), 2012.                                                                                                                                                                                                                                          |  | X |   |   |   |
| Azerbaijan | 01 - AZE | World Health Organisation (WHO). WHO Mortality Database Version February 2014. Geneva, Switzerland: World Health Organisation (WHO), 2014.                                                                                                                                                                                                                                      |  | X |   |   |   |
| Azerbaijan | 02 - AZE | World Health Organisation (WHO). WHO Mortality Database Version July 2012. Geneva, Switzerland: World Health Organisation (WHO), 2012.                                                                                                                                                                                                                                          |  | X |   |   |   |
| Bahrain    | 01 - BHR | World Health Organisation (WHO). WHO Mortality Database Version February 2014. Geneva, Switzerland: World Health Organisation (WHO), 2014.                                                                                                                                                                                                                                      |  | X |   |   |   |
| Bangladesh | 01 - BGD | Alauddin M. Maternal mortality in rural Bangladesh: the Tangail District. Stud Fam Plann. 1986; 17(1): 13-21.                                                                                                                                                                                                                                                                   |  |   |   |   | X |
| Bangladesh | 02 - BGD | Associates for Community and Population Research (ACPR), Johns Hopkins University (JHU), Macro International, Inc, Mitra and Associates, National Institute of Population Research and Training (NIPORT), National Institute of Statistics and Demography (Burkina Faso), ORC Macro. Bangladesh Demographic and Health Survey 1993-1994, 1996-1997, 1999-2000, 2001. ORC Macro. |  |   | X |   |   |
| Bangladesh | 03 - BGD | Australian Agency for International Development (AusAID), International Centre for Diarrhoeal Disease Research (Bangladesh), Ministry of Health and Family Welfare (Bangladesh), National Institute of Population Research and Training (NIPORT), USAID, United Nations Population Fund (UNFPA). Bangladesh Maternal Mortality and Health Service Survey 2010.                  |  |   |   | X |   |
| Bangladesh | 04 - BGD | Fauveau V, Wojtyniak B, Chakraborty J, Sarder AM, Briend A. The effect of maternal and child health and family planning services on mortality: Is prevention enough?. BMJ. 1990; 301(6743): 103-7.                                                                                                                                                                              |  |   |   |   | X |
| Bangladesh | 05 - BGD | INDEPTH, International Centre for Diarrhoeal Disease Research (Bangladesh). Bangladesh - Matlab Health and Demographic Surveillance System. Dhaka, Bangladesh: International Centre for Diarrhoeal Disease Research (Bangladesh).                                                                                                                                               |  |   |   |   | X |
| Bangladesh | 06 - BGD | INDEPTH. Bangladesh - AMK Health and Demographic Surveillance System.                                                                                                                                                                                                                                                                                                           |  |   |   |   | X |
| Bangladesh | 07 - BGD | Khan AR, Jahan FA, Begum SF. Maternal mortality in rural Bangladesh: the Jamalpur District. Stud Fam Plann. 1986; 17(1): 7-12.                                                                                                                                                                                                                                                  |  |   |   |   | X |
| Bangladesh | 08 - BGD | Shahidullah M. A comparison of sisterhood information on causes of maternal death with the registration causes of maternal death in Matlab, Bangladesh. Int J Epidemiol. 1995; 24(5): 937-42.                                                                                                                                                                                   |  |   |   |   | X |
| Barbados   | 01 - BRB | World Health Organisation (WHO). WHO Mortality Database Version February 2014. Geneva, Switzerland: World Health Organisation (WHO), 2014.                                                                                                                                                                                                                                      |  | X |   |   |   |
| Barbados   | 02 - BRB | World Health Organisation (WHO). WHO Mortality Database Version July 2012. Geneva, Switzerland: World Health Organisation (WHO), 2012.                                                                                                                                                                                                                                          |  | X |   |   |   |
| Belarus    | 01 - BLR | World Health Organisation (WHO). WHO Mortality Database Version February 2014. Geneva, Switzerland: World Health Organisation (WHO), 2014.                                                                                                                                                                                                                                      |  | X |   |   |   |

|                        |          |                                                                                                                                                                                             |  |   |   |   |   |
|------------------------|----------|---------------------------------------------------------------------------------------------------------------------------------------------------------------------------------------------|--|---|---|---|---|
| Belarus                | 02 - BLR | World Health Organisation (WHO). WHO Mortality Database Version July 2012. Geneva, Switzerland: World Health Organisation (WHO), 2012.                                                      |  | X |   |   |   |
| Belgium                | 01 - BEL | World Health Organisation (WHO). WHO Mortality Database Version February 2014. Geneva, Switzerland: World Health Organisation (WHO), 2014.                                                  |  | X |   |   |   |
| Belgium                | 02 - BEL | World Health Organisation (WHO). WHO Mortality Database Version July 2012. Geneva, Switzerland: World Health Organisation (WHO), 2012.                                                      |  | X |   |   |   |
| Belize                 | 01 - BLZ | World Health Organisation (WHO). WHO Mortality Database Version February 2014. Geneva, Switzerland: World Health Organisation (WHO), 2014.                                                  |  | X |   |   |   |
| Belize                 | 02 - BLZ | World Health Organisation (WHO). WHO Mortality Database Version July 2012. Geneva, Switzerland: World Health Organisation (WHO), 2012.                                                      |  | X |   |   |   |
| Benin                  | 01 - BEN | Macro International, Inc, National Institute of Statistics and Economic Analysis (INSAE) (Benin). Benin Demographic and Health Survey 1996, 2001, 2006.                                     |  |   | X |   |   |
| Bermuda                | 01 - BMU | World Health Organisation (WHO). WHO Mortality Database Version February 2014. Geneva, Switzerland: World Health Organisation (WHO), 2014.                                                  |  | X |   |   |   |
| Bermuda                | 02 - BMU | World Health Organisation (WHO). WHO Mortality Database Version July 2012. Geneva, Switzerland: World Health Organisation (WHO), 2012.                                                      |  | X |   |   |   |
| Bhutan                 | 01 - BTN | Bhutan Health Survey 1994                                                                                                                                                                   |  |   |   | X |   |
| Bhutan                 | 02 - BTN | Bhutan Health Survey 2000                                                                                                                                                                   |  |   |   | X |   |
| Bhutan                 | 03 - BTN | National Statistics Bureau (Bhutan). Bhutan Demographic Sample Survey 1984.                                                                                                                 |  |   |   | X |   |
| Bhutan                 | 04 - BTN | Office of the Census Commissioner (Bhutan). Bhutan Population and Housing Census 2005. Thimphu, Bhutan: Office of the Census Commissioner (Bhutan), 2006.                                   |  |   |   | X |   |
| Bolivia                | 01 - BOL | Macro International, Inc, Ministry of Health and Sports (Bolivia), National Institute of Statistics (Bolivia). Bolivia Demographic and Health Survey 1989, 1993-94, 1998, 2003-2004, 2008.  |  |   | X |   |   |
| Bolivia                | 02 - BOL | National Institute of Statistics (Bolivia). Bolivia National Census of Population and Housing 2001. 2009.                                                                                   |  |   |   | X |   |
| Bolivia                | 03 - BOL | World Health Organisation (WHO). WHO Mortality Database Version February 2014. Geneva, Switzerland: World Health Organisation (WHO), 2014.                                                  |  | X |   |   |   |
| Bosnia and Herzegovina | 01 - BIH | World Health Organisation (WHO). WHO Mortality Database Version February 2014. Geneva, Switzerland: World Health Organisation (WHO), 2014.                                                  |  | X |   |   |   |
| Botswana               | 01 - BWA | Central Statistics Office (Botswana). Botswana AIDS Impact Survey 2008. Gaborone, Botswana: Central Statistics Office (Botswana).                                                           |  |   |   | X |   |
| Brazil                 | 01 - BRA | Brazilian Society for Family Welfare (BEMFAM), Macro International, Inc. Brazil Demographic and Health Survey 1986, 1996.                                                                   |  |   | X |   |   |
| Brazil                 | 02 - BRA | Correia RA, Araújo HC, Furtado BMA, Bonfim C. [Epidemiological features of maternal deaths occurred in Recife, PE, Brazil (2000-2006)]. Rev Bras Enferm. 2011; 64(1): 91-7.                 |  |   |   |   | X |
| Brazil                 | 03 - BRA | Soares VMN, de Souza KV, Freygang TC, Correa V, Saito MR. [Maternal mortality due to pre-eclampsia/eclampsia in a state in southern Brazil]. Rev Bras Ginecol Obstet. 2009; 31(11): 566-73. |  |   |   |   | X |
| Brazil                 | 04 - BRA | World Health Organisation (WHO). WHO Mortality Database Version February 2014. Geneva, Switzerland: World Health Organisation (WHO), 2014.                                                  |  | X |   |   |   |

|              |          |                                                                                                                                                                                                                                                                                                                                                                                                                                                         |  |   |   |   |   |
|--------------|----------|---------------------------------------------------------------------------------------------------------------------------------------------------------------------------------------------------------------------------------------------------------------------------------------------------------------------------------------------------------------------------------------------------------------------------------------------------------|--|---|---|---|---|
| Brunei       | 01 - BRN | World Health Organisation (WHO). WHO Mortality Database Version February 2014. Geneva, Switzerland: World Health Organisation (WHO), 2014.                                                                                                                                                                                                                                                                                                              |  | X |   |   |   |
| Brunei       | 02 - BRN | World Health Organisation (WHO). WHO Mortality Database Version July 2012. Geneva, Switzerland: World Health Organisation (WHO), 2012.                                                                                                                                                                                                                                                                                                                  |  | X |   |   |   |
| Bulgaria     | 01 - BGR | World Health Organisation (WHO). WHO Mortality Database Version February 2014. Geneva, Switzerland: World Health Organisation (WHO), 2014.                                                                                                                                                                                                                                                                                                              |  | X |   |   |   |
| Bulgaria     | 02 - BGR | World Health Organisation (WHO). WHO Mortality Database Version July 2012. Geneva, Switzerland: World Health Organisation (WHO), 2012.                                                                                                                                                                                                                                                                                                                  |  | X |   |   |   |
| Burkina Faso | 01 - BFA | Bell JS, Ouédraogo M, Ganaba R, Sombié I, Byass P, Baggaley RF, Filippi V, Fitzmaurice AE, Graham WJ. The epidemiology of pregnancy outcomes in rural Burkina Faso. Trop Med Int Health. 2008; 13 Suppl 1: 31-43.                                                                                                                                                                                                                                       |  |   | X |   | X |
| Burkina Faso | 02 - BFA | INDEPTH. Burkina Faso - Nouna Health and Demographic Surveillance System.                                                                                                                                                                                                                                                                                                                                                                               |  |   |   |   | X |
| Burkina Faso | 03 - BFA | Macro International, Inc, National Institute of Statistics and Demography (Burkina Faso). Burkina Faso Demographic and Health Survey 1992-1993, 1998-1999, 2003, 2010-2011.                                                                                                                                                                                                                                                                             |  |   | X |   |   |
| Burkina Faso | 04 - BFA | Ministry of Health (Burkina Faso). Burkina Faso Health Statistical Yearbook 2006. Ouagadougou, Burkina Faso: Ministry of Health (Burkina Faso), 2007.                                                                                                                                                                                                                                                                                                   |  |   |   | X |   |
| Burkina Faso | 05 - BFA | National Institute of Statistics and Demography (INSD) (Burkina Faso), Government of Burkina Faso, United Nations Population Fund (UNFPA), United Nations Children's Fund (UNICEF), European Union (EU), National Census Committee (Burkina Faso), Central Census Bureau (Burkina Faso), World Bank Development of The National Statistical System Project, Kingdom of Denmark, Kingdom of Luxembourg. Burkina Faso Population and Housing Census 2006. |  |   |   | X |   |
| Burkina Faso | 06 - BFA | Ramroth H, Lorenz E, Rankin JC, Fottrell E, Yé M, Neuhann F, Ssennono M, Sié A, Byass P, Becher H. Causas de la distribución de muerte con el modelo InterVA y la codificación de médicos en un área rural de Burkina Faso. Trop Med Int Health. 2012; 17(7): 904-13.                                                                                                                                                                                   |  |   |   |   | X |
| Burkina Faso | 07 - BFA | Würthwein R, Gbangou A, Sauerborn R, Schmidt CM. Measuring the local burden of disease. A study of years of life lost in sub-Saharan Africa. Int J Epidemiol. 2001; 30(3): 501-8.                                                                                                                                                                                                                                                                       |  |   |   |   | X |
| Burkina Faso | 08 - BFA | Yé M, Diboulo E, Niamba L, Sié A, Coulibaly B, Bagagnan C, Dembélé J, Ramroth H. An improved method for physician-certified verbal autopsy reduces the rate of discrepancy: experiences in the Nouna Health and Demographic Surveillance Site (NHDSS), Burkina Faso. Popul Health Metr. 2011; 9: 34.                                                                                                                                                    |  |   |   |   | X |
| Burundi      | 01 - BDI | ICF Macro. Demographic and Health Surveys. Measure DHS.                                                                                                                                                                                                                                                                                                                                                                                                 |  |   | X |   |   |
| Cambodia     | 01 - KHM | Chandy H, Heng YV, Samol H, Husum H. Comparing two survey methods for estimating maternal and perinatal mortality in rural Cambodia. Women and Birth. 2008; 21(1): 9-12.                                                                                                                                                                                                                                                                                |  |   | X |   |   |
| Cambodia     | 02 - KHM | ICF Macro, Ministry of Health (Cambodia), National Institute of Public Health (Cambodia), National Institute of Statistics (Cambodia). Cambodia Demographic and Health Survey 2000, 2005-2006, 2010-2011. ICF Macro.                                                                                                                                                                                                                                    |  |   | X |   |   |
| Cambodia     | 03 - KHM | National Institute of Statistics (Cambodia), Minnesota Population Center. Cambodia General Population Census 2008 from the Integrated Public Use Microdata Series, International: [Machine-readable database]. Minneapolis: University of Minnesota, 2011.                                                                                                                                                                                              |  |   |   | X |   |

|                          |          |                                                                                                                                                                                                                         |   |   |   |  |   |   |
|--------------------------|----------|-------------------------------------------------------------------------------------------------------------------------------------------------------------------------------------------------------------------------|---|---|---|--|---|---|
| Cambodia                 | 04 - KHM | National Institute of Statistics (Cambodia). Cambodia General Population Census 2008 . Phnom Penh, Cambodia: National Institute of Statistics (Cambodia).                                                               |   |   |   |  | X |   |
| Cameroon                 | 01 - CMR | ICF International. Cameroon Demographic and Health Survey 1991, 1998, 2004, 2011.                                                                                                                                       |   |   | X |  |   |   |
| Canada                   | 01 - CAN | World Health Organisation (WHO). WHO Mortality Database Version February 2014. Geneva, Switzerland: World Health Organisation (WHO), 2014.                                                                              |   | X |   |  |   |   |
| Canada                   | 02 - CAN | World Health Organisation (WHO). WHO Mortality Database Version July 2012. Geneva, Switzerland: World Health Organisation (WHO), 2012.                                                                                  |   | X |   |  |   |   |
| Cape Verde               | 01 - CPV | Wessel H, Reitmaier P, Dupret A, Rocha E, Cnattingius S, Bergström S. Deaths among women of reproductive age in Cape Verde: causes and avoidability. Acta Obstet Gynecol Scand. 1999; 78(3): 225-32.                    |   |   |   |  |   | X |
| Cape Verde               | 02 - CPV | World Health Organisation (WHO). WHO Mortality Database Version July 2012. Geneva, Switzerland: World Health Organisation (WHO), 2012.                                                                                  |   | X |   |  |   |   |
| Central African Republic | 01 - CAF | Division of Statistics and Economic Studies (Central African Republic), Macro International, Inc. Central African Republic Demographic and Health Survey 1994-1995. Calverton, United States: Macro International, Inc. |   |   | X |  |   |   |
| Chad                     | 01 - TCD | Census Bureau (Chad), Macro International, Inc, National Institute of Statistical, Economic and Demographic Studies (Chad). Chad Demographic and Health Survey 1996-1997, 2004.                                         |   |   | X |  |   |   |
| Chile                    | 01 - CHL | Ministry of Health (Chile), National Institute of Statistics (Chile). Chile Vital Registration - Deaths 1985.                                                                                                           |   | X |   |  |   |   |
| Chile                    | 02 - CHL | World Health Organisation (WHO). WHO Mortality Database Version February 2014. Geneva, Switzerland: World Health Organisation (WHO), 2014.                                                                              |   | X |   |  |   |   |
| Chile                    | 03 - CHL | World Health Organisation (WHO). WHO Mortality Database Version July 2012. Geneva, Switzerland: World Health Organisation (WHO), 2012.                                                                                  |   | X |   |  |   |   |
| China                    | 01 - CHN | China National Maternal and Child Health Surveillance System Maternal Mortality By Cause 1996-2005 - MCHS.                                                                                                              | X |   |   |  |   |   |
| China                    | 02 - CHN | China National Maternal and Child Health Surveillance System Maternal Mortality By Cause 2006-2012 - MCHS.                                                                                                              | X |   |   |  |   |   |
| China                    | 03 - CHN | Chinese Center for Disease Control and Prevention (CCDC). China Disease Surveillance Points 1991 - China CDC.                                                                                                           |   | X |   |  |   |   |
| China                    | 04 - CHN | Chinese Center for Disease Control and Prevention (CCDC). China Disease Surveillance Points 1993 - China CDC.                                                                                                           |   | X |   |  |   |   |
| China                    | 05 - CHN | Chinese Center for Disease Control and Prevention (CCDC). China Disease Surveillance Points 1994 - China CDC.                                                                                                           |   | X |   |  |   |   |
| China                    | 06 - CHN | Chinese Center for Disease Control and Prevention (CCDC). China Disease Surveillance Points 1995 - China CDC.                                                                                                           |   | X |   |  |   |   |
| China                    | 07 - CHN | Chinese Center for Disease Control and Prevention (CCDC). China Disease Surveillance Points 1996 - China CDC.                                                                                                           |   | X |   |  |   |   |
| China                    | 08 - CHN | Chinese Center for Disease Control and Prevention (CCDC). China Disease Surveillance Points 1997 - China CDC.                                                                                                           |   | X |   |  |   |   |
| China                    | 09 - CHN | Chinese Center for Disease Control and Prevention (CCDC). China Disease Surveillance Points 1998 - China CDC.                                                                                                           |   | X |   |  |   |   |
| China                    | 10 - CHN | Chinese Center for Disease Control and Prevention (CCDC). China Disease Surveillance Points 1999 - China CDC.                                                                                                           |   | X |   |  |   |   |
| China                    | 11 - CHN | Chinese Center for Disease Control and Prevention (CCDC). China Disease Surveillance Points 2000 - China CDC.                                                                                                           |   | X |   |  |   |   |
| China                    | 12 - CHN | Chinese Center for Disease Control and Prevention (CCDC). China Disease Surveillance Points 2001 - China CDC.                                                                                                           |   | X |   |  |   |   |



|               |          |                                                                                                                                                                                           |   |   |   |  |  |
|---------------|----------|-------------------------------------------------------------------------------------------------------------------------------------------------------------------------------------------|---|---|---|--|--|
| China         | 13 - CHN | Chinese Center for Disease Control and Prevention (CCDC). China Disease Surveillance Points 2002 - China CDC.                                                                             |   | X |   |  |  |
| China         | 14 - CHN | Chinese Center for Disease Control and Prevention (CCDC). China Disease Surveillance Points 2004 - China CDC.                                                                             |   | X |   |  |  |
| China         | 15 - CHN | Chinese Center for Disease Control and Prevention (CCDC). China Disease Surveillance Points 2005 - China CDC.                                                                             |   | X |   |  |  |
| China         | 16 - CHN | Chinese Center for Disease Control and Prevention (CCDC). China Disease Surveillance Points 2006 - China CDC.                                                                             |   | X |   |  |  |
| China         | 17 - CHN | Chinese Center for Disease Control and Prevention (CCDC). China Disease Surveillance Points 2007 - China CDC.                                                                             |   | X |   |  |  |
| China         | 18 - CHN | Chinese Center for Disease Control and Prevention (CCDC). China Disease Surveillance Points 2008 - China CDC.                                                                             |   | X |   |  |  |
| China         | 19 - CHN | Chinese Center for Disease Control and Prevention (CCDC). China Disease Surveillance Points 2009 - China CDC.                                                                             |   | X |   |  |  |
| China         | 20 - CHN | Chinese Center for Disease Control and Prevention (CCDC). China Disease Surveillance Points 2010 - China CDC.                                                                             |   | X |   |  |  |
| China         | 21 - CHN | Chinese Center for Disease Control and Prevention (CCDC). China Disease Surveillance Points 2011 - China CDC.                                                                             |   | X |   |  |  |
| China         | 22 - CHN | Chinese Center for Disease Control and Prevention (CCDC). China Disease Surveillance Points Population and Child Mortality 1991-2012.                                                     | X |   |   |  |  |
| China         | 23 - CHN | World Health Organisation (WHO). WHO Mortality Database Version February 2014. Geneva, Switzerland: World Health Organisation (WHO), 2014.                                                |   | X |   |  |  |
| China         | 24 - CHN | World Health Organisation (WHO). WHO Mortality Database Version July 2012. Geneva, Switzerland: World Health Organisation (WHO), 2012.                                                    |   | X |   |  |  |
| Colombia      | 01 - COL | National Administrative Department of Statistics (Colombia). Colombia Vital Statistics - Deaths 2008. Bogotá, Colombia: National Administrative Department of Statistics (Colombia).      |   | X |   |  |  |
| Colombia      | 02 - COL | World Health Organisation (WHO). WHO Mortality Database Version February 2014. Geneva, Switzerland: World Health Organisation (WHO), 2014.                                                |   | X |   |  |  |
| Colombia      | 03 - COL | World Health Organisation (WHO). WHO Mortality Database Version July 2012. Geneva, Switzerland: World Health Organisation (WHO), 2012.                                                    |   | X |   |  |  |
| Congo         | 01 - COG | Macro International, Inc, National Center for Statistics and Economic Studies (Congo, Rep.). Congo, Rep. Demographic and Health Survey 2005, 2011-2012.                                   |   |   | X |  |  |
| Costa Rica    | 01 - CRI | World Health Organisation (WHO). WHO Mortality Database Version February 2014. Geneva, Switzerland: World Health Organisation (WHO), 2014.                                                |   | X |   |  |  |
| Costa Rica    | 02 - CRI | World Health Organisation (WHO). WHO Mortality Database Version July 2012. Geneva, Switzerland: World Health Organisation (WHO), 2012.                                                    |   | X |   |  |  |
| Cote d'Ivoire | 01 - CIV | ICF International, National Institute of Statistics (Côte d'Ivoire). Côte d'Ivoire Demographic and Health Survey 1994, 1998-1999, 2011-2012 and Côte d'Ivoire AIDS Indicator Survey 2005. |   |   | X |  |  |
| Croatia       | 01 - HRV | World Health Organisation (WHO). WHO Mortality Database Version February 2014. Geneva, Switzerland: World Health Organisation (WHO), 2014.                                                |   | X |   |  |  |
| Croatia       | 02 - HRV | World Health Organisation (WHO). WHO Mortality Database Version July 2012. Geneva, Switzerland: World Health Organisation (WHO), 2012.                                                    |   | X |   |  |  |
| Cuba          | 01 - CUB | World Health Organisation (WHO). WHO Mortality Database Version February 2014. Geneva, Switzerland: World Health Organisation (WHO), 2014.                                                |   | X |   |  |  |

|                                  |          |                                                                                                                                                                                                                                                                                          |   |   |   |  |   |
|----------------------------------|----------|------------------------------------------------------------------------------------------------------------------------------------------------------------------------------------------------------------------------------------------------------------------------------------------|---|---|---|--|---|
| Cuba                             | 02 - CUB | World Health Organisation (WHO). WHO Mortality Database Version July 2012. Geneva, Switzerland: World Health Organisation (WHO), 2012.                                                                                                                                                   |   | X |   |  |   |
| Cyprus                           | 01 - CYP | World Health Organisation (WHO). WHO Mortality Database Version February 2014. Geneva, Switzerland: World Health Organisation (WHO), 2014.                                                                                                                                               |   | X |   |  |   |
| Cyprus                           | 02 - CYP | World Health Organisation (WHO). WHO Mortality Database Version July 2012. Geneva, Switzerland: World Health Organisation (WHO), 2012.                                                                                                                                                   |   | X |   |  |   |
| Czech Republic                   | 01 - CZE | World Health Organisation (WHO). WHO Mortality Database Version February 2014. Geneva, Switzerland: World Health Organisation (WHO), 2014.                                                                                                                                               |   | X |   |  |   |
| Czech Republic                   | 02 - CZE | World Health Organisation (WHO). WHO Mortality Database Version July 2012. Geneva, Switzerland: World Health Organisation (WHO), 2012.                                                                                                                                                   |   | X |   |  |   |
| Democratic Republic of the Congo | 01 - COD | Coghlan B, Brennan RJ, Ngoy P, Dofara D, Otto B, Clements M, Stewart T. Mortality in the Democratic Republic of Congo: a nationwide survey. Lancet. 2006; 367(9504): 44-51.                                                                                                              |   |   |   |  | X |
| Democratic Republic of the Congo | 02 - COD | Delacollette C, Van der Stuyft P, Molima K, Delacollette-Lebrun C, Wery M. Etude de la mortalité globale et de la mortalité liée au paludisme dans le Kivu montagneux, Zaïre. Rev Epidemiol Sante Publique. 1989; 37(2): 161-6.                                                          |   |   |   |  | X |
| Democratic Republic of the Congo | 03 - COD | Ministry of Planning (Congo, DR), Macro International, Inc. Congo, DR Demographic and Health Survey 2007. Calverton, United States: Macro International, Inc.                                                                                                                            |   |   | X |  |   |
| Democratic Republic of the Congo | 04 - COD | Van Den Broeck J, Eeckels R, Vuylsteke J. Influence of nutritional status on child mortality in rural Zaïre. Lancet. 1993; 341(8859): 1491-5.                                                                                                                                            |   |   |   |  | X |
| Denmark                          | 01 - DNK | World Health Organisation (WHO). WHO Mortality Database Version February 2014. Geneva, Switzerland: World Health Organisation (WHO), 2014.                                                                                                                                               |   | X |   |  |   |
| Denmark                          | 02 - DNK | World Health Organisation (WHO). WHO Mortality Database Version July 2012. Geneva, Switzerland: World Health Organisation (WHO), 2012.                                                                                                                                                   |   | X |   |  |   |
| Djibouti                         | 01 - DJI | Department of Statistics and Demographic Studies (Djibouti), League of Arab States, Ministry of Health (Djibouti), Pan Arab Project for Family Health (PAPFAM). Djibouti Family Health Survey 2002.                                                                                      | X |   |   |  |   |
| Dominica                         | 01 - DMA | World Health Organisation (WHO). WHO Mortality Database Version February 2014. Geneva, Switzerland: World Health Organisation (WHO), 2014.                                                                                                                                               |   | X |   |  |   |
| Dominica                         | 02 - DMA | World Health Organisation (WHO). WHO Mortality Database Version July 2012. Geneva, Switzerland: World Health Organisation (WHO), 2012.                                                                                                                                                   |   | X |   |  |   |
| Dominican Republic               | 01 - DOM | Center for Social and Demographic Studies (CESDEM), Macro International, Inc, National Council for Population and Family (Dominican Republic), National Planning Office (Dominican Republic), Profamilia. Dominican Republic Demographic and Health Survey 1986, 1991, 1996, 2002, 2007. |   |   | X |  |   |
| Dominican Republic               | 02 - DOM | Westhoff WW, Calcano ER, McDermott RJ, Trudnak TE, Lopez GE. Estimating Maternal Mortality in Monseñor Nouel Province, Dominican Republic. Matern Child Health J. 2009; 13(5): 707-14.                                                                                                   |   |   | X |  |   |
| Dominican Republic               | 03 - DOM | World Health Organisation (WHO). WHO Mortality Database Version February 2014. Geneva, Switzerland: World Health Organisation (WHO), 2014.                                                                                                                                               |   | X |   |  |   |
| Dominican Republic               | 04 - DOM | World Health Organisation (WHO). WHO Mortality Database Version July 2012. Geneva, Switzerland: World Health Organisation (WHO), 2012.                                                                                                                                                   |   | X |   |  |   |

|              |          |                                                                                                                                                                                                                                                                                                                          |   |   |   |   |   |
|--------------|----------|--------------------------------------------------------------------------------------------------------------------------------------------------------------------------------------------------------------------------------------------------------------------------------------------------------------------------|---|---|---|---|---|
| Eastern Cape | 01 - ZEC | Department of Home Affairs (South Africa), Statistics South Africa. South Africa Mortality and Causes of Death 1997-2005. Pretoria, South Africa: Statistics South Africa.                                                                                                                                               |   | X |   |   |   |
| Ecuador      | 01 - ECU | Center for Studies of Population and Social Development (Ecuador), Division of Reproductive Health-Centers for Disease Control and Prevention (CDC). Ecuador Reproductive Health Survey 1989, 1994, 1999, 2004.                                                                                                          |   |   | X |   |   |
| Ecuador      | 02 - ECU | World Health Organisation (WHO). WHO Mortality Database Version February 2014. Geneva, Switzerland: World Health Organisation (WHO), 2014.                                                                                                                                                                               |   | X |   |   |   |
| Ecuador      | 03 - ECU | World Health Organisation (WHO). WHO Mortality Database Version July 2012. Geneva, Switzerland: World Health Organisation (WHO), 2012.                                                                                                                                                                                   |   | X |   |   |   |
| Egypt        | 01 - EGY | Campbell O, Gipson R, Issa AH, Matta N, El Deeb B, El Mohandes A, Alwen A, Mansour E. National maternal mortality ratio in Egypt halved between 1992-93 and 2000. Bull World Health Organ. 2005; 83(6): 462-71.                                                                                                          |   |   |   |   | X |
| Egypt        | 02 - EGY | Grubb GS, Fortney JA, Saleh S, Gadalla S, el-Baz A, Feldblum P, Rogers SM. A comparison of two cause-of-death classification systems for deaths among women of reproductive age in Menoufia, Egypt. Int J Epidemiol. 1988; 17(2): 385-91.                                                                                |   |   |   |   | X |
| Egypt        | 03 - EGY | Kane TT, el-Kady AA, Saleh S, Hage M, Stanback J, Potter L. Maternal mortality in Giza, Egypt: magnitude, causes, and prevention. Stud Fam Plann. 1992; 23(1): 45-57.                                                                                                                                                    |   |   |   |   | X |
| Egypt        | 04 - EGY | Ministry of Health and Population (Egypt). Egypt Maternal Mortality Surveillance System 2004-2006.                                                                                                                                                                                                                       | X |   |   |   |   |
| Egypt        | 05 - EGY | World Health Organisation (WHO). WHO Mortality Database Version February 2014. Geneva, Switzerland: World Health Organisation (WHO), 2014.                                                                                                                                                                               |   | X |   |   |   |
| Egypt        | 06 - EGY | World Health Organisation (WHO). WHO Mortality Database Version July 2012. Geneva, Switzerland: World Health Organisation (WHO), 2012.                                                                                                                                                                                   |   | X |   |   |   |
| El Salvador  | 01 - SLV | Division of Reproductive Health-Centers for Disease Control and Prevention (CDC), Salvadoran Demographic Association (ADS). El Salvador Reproductive Health Survey 1993, 1998, 2002-2003.                                                                                                                                |   |   | X |   |   |
| El Salvador  | 02 - SLV | Ministry of Health (El Salvador). El Salvador Maternal Mortality Surveillance System 2006-2010.                                                                                                                                                                                                                          | X |   |   |   |   |
| El Salvador  | 03 - SLV | Minnesota Population Center, General Administration of Statistics and Censuses (El Salvador), Ministry of Economy (El Salvador). El Salvador Population and Housing Census 2007 from the Integrated Public Use Microdata Series, International: [Machine-readable database]. Minneapolis: University of Minnesota, 2012. |   |   |   | X |   |
| El Salvador  | 04 - SLV | World Health Organisation (WHO). WHO Mortality Database Version February 2014. Geneva, Switzerland: World Health Organisation (WHO), 2014.                                                                                                                                                                               |   | X |   |   |   |
| El Salvador  | 05 - SLV | World Health Organisation (WHO). WHO Mortality Database Version July 2012. Geneva, Switzerland: World Health Organisation (WHO), 2012.                                                                                                                                                                                   |   | X |   |   |   |
| Eritrea      | 01 - ERI | Macro International, Inc, National Statistics and Evaluation Office (Eritrea). Eritrea Demographic and Health Survey 1995-1996, 2002.                                                                                                                                                                                    |   |   | X |   |   |
| Estonia      | 01 - EST | World Health Organisation (WHO). WHO Mortality Database Version February 2014. Geneva, Switzerland: World Health Organisation (WHO), 2014.                                                                                                                                                                               |   | X |   |   |   |
| Estonia      | 02 - EST | World Health Organisation (WHO). WHO Mortality Database Version July 2012. Geneva, Switzerland: World Health Organisation (WHO), 2012.                                                                                                                                                                                   |   | X |   |   |   |

|            |          |                                                                                                                                                                                                                                                                                        |   |  |   |   |   |   |
|------------|----------|----------------------------------------------------------------------------------------------------------------------------------------------------------------------------------------------------------------------------------------------------------------------------------------|---|--|---|---|---|---|
| Ethiopia   | 01 - ETH | Central Statistical Agency (Ethiopia), Government of Ethiopia, United Nations Population Fund (UNFPA), United Nations Development Programme (UNDP). Ethiopia Population and Housing Census 2007. Addis Ababa, Ethiopia: Central Statistical Agency (Ethiopia).                         |   |  |   |   | X |   |
| Ethiopia   | 02 - ETH | Central Statistical Agency (Ethiopia), Macro International, Inc, Ministry of Health (Ethiopia), Population and Housing Census Commissions Office (PHCCO). Ethiopia Demographic and Health Survey 2000, 2005, 2010-2011. ICF Macro.                                                     |   |  |   | X |   |   |
| Ethiopia   | 03 - ETH | INDEPTH. Ethiopia - Butajira Health and Demographic Surveillance System.                                                                                                                                                                                                               |   |  |   |   |   | X |
| Ethiopia   | 04 - ETH | Kwast BE, Rochat RW, Kidane-Mariam W. Maternal mortality in Addis Ababa, Ethiopia. Stud Fam Plann. 1986; 17(6 (Pt 1)): 288-301.                                                                                                                                                        |   |  |   |   |   | X |
| Ethiopia   | 05 - ETH | Lulu K, Berhane Y. The use of simplified verbal autopsy in identifying causes of adult death in a predominantly rural population in Ethiopia. BMC Public Health. 2005; 5: 58.                                                                                                          |   |  |   |   |   | X |
| Ethiopia   | 06 - ETH | Mersha A, Jira C, Demessie S. Community based study on maternal mortality in Jimma town, south western Ethiopia. Indian J Public Health. 1996; 40(2): 30-4.                                                                                                                            |   |  |   |   |   | X |
| Ethiopia   | 07 - ETH | Reniers G, Araya T, Schaap A, Kumie A, Kebede D, Nagelkerke N, Coutinho R, Sanders EJ. Monitoring cause-specific adult mortality in developing countries: a comparison of data sources for Addis Ababa and its implications for policy and research. Soc Sci Med. 2005; 61(9): 1952-7. | X |  |   |   |   |   |
| Ethiopia   | 08 - ETH | Yaya Y, Lindtjörn B. High maternal mortality in rural south-west Ethiopia: estimate by using the sisterhood method. BMC Pregnancy Childbirth. 2012; 12(1): 136.                                                                                                                        |   |  |   | X |   |   |
| Fiji       | 01 - FIJ | World Health Organisation (WHO). WHO Mortality Database Version February 2014. Geneva, Switzerland: World Health Organisation (WHO), 2014.                                                                                                                                             |   |  | X |   |   |   |
| Fiji       | 02 - FIJ | World Health Organisation (WHO). WHO Mortality Database Version July 2012. Geneva, Switzerland: World Health Organisation (WHO), 2012.                                                                                                                                                 |   |  | X |   |   |   |
| Finland    | 01 - FIN | World Health Organisation (WHO). WHO Mortality Database Version February 2014. Geneva, Switzerland: World Health Organisation (WHO), 2014.                                                                                                                                             |   |  | X |   |   |   |
| Finland    | 02 - FIN | World Health Organisation (WHO). WHO Mortality Database Version July 2012. Geneva, Switzerland: World Health Organisation (WHO), 2012.                                                                                                                                                 |   |  | X |   |   |   |
| France     | 01 - FRA | World Health Organisation (WHO). WHO Mortality Database Version February 2014. Geneva, Switzerland: World Health Organisation (WHO), 2014.                                                                                                                                             |   |  | X |   |   |   |
| France     | 02 - FRA | World Health Organisation (WHO). WHO Mortality Database Version July 2012. Geneva, Switzerland: World Health Organisation (WHO), 2012.                                                                                                                                                 |   |  | X |   |   |   |
| Free State | 01 - ZFS | Department of Home Affairs (South Africa), Statistics South Africa. South Africa Mortality and Causes of Death 1997-2005. Pretoria, South Africa: Statistics South Africa.                                                                                                             |   |  | X |   |   |   |
| Gabon      | 01 - GAB | General Directorate of Statistics (Gabon), Macro International, Inc. Gabon Demographic and Health Survey 2000-2001, 2012.                                                                                                                                                              |   |  |   | X |   |   |
| Gauteng    | 01 - ZGA | Department of Home Affairs (South Africa), Statistics South Africa. South Africa Mortality and Causes of Death 1997-2005. Pretoria, South Africa: Statistics South Africa.                                                                                                             |   |  | X |   |   |   |
| Georgia    | 01 - GEO | World Health Organisation (WHO). WHO Mortality Database Version February 2014. Geneva, Switzerland: World Health Organisation (WHO), 2014.                                                                                                                                             |   |  | X |   |   |   |

|           |          |                                                                                                                                                                                                                                                                                                                                                     |  |   |   |  |   |
|-----------|----------|-----------------------------------------------------------------------------------------------------------------------------------------------------------------------------------------------------------------------------------------------------------------------------------------------------------------------------------------------------|--|---|---|--|---|
| Germany   | 01 - DEU | World Health Organisation (WHO). WHO Mortality Database Version February 2014. Geneva, Switzerland: World Health Organisation (WHO), 2014.                                                                                                                                                                                                          |  | X |   |  |   |
| Germany   | 02 - DEU | World Health Organisation (WHO). WHO Mortality Database Version July 2012. Geneva, Switzerland: World Health Organisation (WHO), 2012.                                                                                                                                                                                                              |  | X |   |  |   |
| Ghana     | 01 - GHA | Bawah AA, Binka FN. How many years of life could be saved if malaria were eliminated from a hyperendemic area of northern Ghana?. Am J Trop Med Hyg. 2007; 77(6 Suppl): 145-52.                                                                                                                                                                     |  |   |   |  | X |
| Ghana     | 02 - GHA | Births and Deaths Registry (Ghana). Ghana - Accra Births and Deaths Registry - Deaths 2000-2007.                                                                                                                                                                                                                                                    |  | X |   |  |   |
| Ghana     | 03 - GHA | Ghana Statistical Service, Ghana Health Service, Macro International, Inc. Ghana Special Demographic and Health Survey 2007-2008. Calverton, United States: Macro International, Inc., 2010.                                                                                                                                                        |  |   |   |  | X |
| Ghana     | 04 - GHA | Ghana Statistical Service, Macro International, Inc. Ghana Demographic and Health Survey 1993-1994, 1998-1999, 2003, 2007-2008.                                                                                                                                                                                                                     |  |   | X |  |   |
| Ghana     | 05 - GHA | Hurt L, ten Asbroek A, Amenga-Etego S, Zandoh C, Danso S, Edmond K, Hurt C, Tawiah C, Hill Z, Fenty J, Owusu-Agyei S, Campbell OM, Kirkwood BR. Effect of vitamin A supplementation on cause-specific mortality in women of reproductive age in Ghana: a secondary analysis from the ObaapaVitA trial. Bull World Health Organ. 2013; 91(1): 19-27. |  |   |   |  | X |
| Ghana     | 06 - GHA | INDEPTH. Ghana - Navrongo Health and Demographic Surveillance System.                                                                                                                                                                                                                                                                               |  |   |   |  | X |
| Ghana     | 07 - GHA | Mills S, Williams JE, Wak G, Hodgson A. Maternal mortality decline in the Kassena-Nankana district of northern Ghana. Matern Child Health J. 2008; 12(5): 577-85.                                                                                                                                                                                   |  |   |   |  | X |
| Ghana     | 08 - GHA | Ngom P, Akweongo P, Adongo P, Bawah AA, Binka F. Maternal mortality among the Kassena-Nankana of northern Ghana. Stud Fam Plann. 1999; 30(2): 142-7.                                                                                                                                                                                                |  |   |   |  | X |
| Greece    | 01 - GRC | World Health Organisation (WHO). WHO Mortality Database Version February 2014. Geneva, Switzerland: World Health Organisation (WHO), 2014.                                                                                                                                                                                                          |  | X |   |  |   |
| Greece    | 02 - GRC | World Health Organisation (WHO). WHO Mortality Database Version July 2012. Geneva, Switzerland: World Health Organisation (WHO), 2012.                                                                                                                                                                                                              |  | X |   |  |   |
| Grenada   | 01 - GRD | World Health Organisation (WHO). WHO Mortality Database Version February 2014. Geneva, Switzerland: World Health Organisation (WHO), 2014.                                                                                                                                                                                                          |  | X |   |  |   |
| Grenada   | 02 - GRD | World Health Organisation (WHO). WHO Mortality Database Version July 2012. Geneva, Switzerland: World Health Organisation (WHO), 2012.                                                                                                                                                                                                              |  | X |   |  |   |
| Guatemala | 01 - GTM | Institute of Nutrition of Central America and Panama, Macro International, Inc, National Statistics Institute (Guatemala). Guatemala Demographic and Health Survey 1987, 1995, 1998-1999.                                                                                                                                                           |  |   | X |  |   |
| Guatemala | 02 - GTM | World Health Organisation (WHO). WHO Mortality Database Version February 2014. Geneva, Switzerland: World Health Organisation (WHO), 2014.                                                                                                                                                                                                          |  | X |   |  |   |
| Guatemala | 03 - GTM | World Health Organisation (WHO). WHO Mortality Database Version July 2012. Geneva, Switzerland: World Health Organisation (WHO), 2012.                                                                                                                                                                                                              |  | X |   |  |   |
| Guinea    | 01 - GIN | Macro International, Inc, National Statistics Directorate (Guinea). Guinea Demographic and Health Survey 1999, 2005.                                                                                                                                                                                                                                |  |   | X |  |   |

|               |          |                                                                                                                                                                                                                                                             |  |   |   |   |   |
|---------------|----------|-------------------------------------------------------------------------------------------------------------------------------------------------------------------------------------------------------------------------------------------------------------|--|---|---|---|---|
| Guinea-Bissau | 01 - GNB | Høj L, Stensballe J, Aaby P. Maternal mortality in Guinea-Bissau: the use of verbal autopsy in a multi-ethnic population. Int J Epidemiol. 1999; 28(1): 70-6.                                                                                               |  |   |   |   | X |
| Guyana        | 01 - GUY | World Health Organisation (WHO). WHO Mortality Database Version February 2014. Geneva, Switzerland: World Health Organisation (WHO), 2014.                                                                                                                  |  | X |   |   |   |
| Guyana        | 02 - GUY | World Health Organisation (WHO). WHO Mortality Database Version July 2012. Geneva, Switzerland: World Health Organisation (WHO), 2012.                                                                                                                      |  | X |   |   |   |
| Haiti         | 01 - HTI | Haiti Child Health Institute (CHI), Haitian Institute of Statistics and Informatics, Macro International, Inc. Haiti Demographic and Health Survey 1994-1995, 2000, 2005-2006.                                                                              |  |   | X |   |   |
| Haiti         | 02 - HTI | World Health Organisation (WHO). WHO Mortality Database Version February 2014. Geneva, Switzerland: World Health Organisation (WHO), 2014.                                                                                                                  |  | X |   |   |   |
| Honduras      | 01 - HND | Honduras Population and Housing Census 2001.                                                                                                                                                                                                                |  |   |   | X |   |
| Honduras      | 02 - HND | Ministry of Health (Honduras), Honduras Family Planning Association (ASHONPLAFA) and Division of Reproductive Health-Centers for Disease Control and Prevention (CDC). (1997) Honduras Reproductive Health Survey 1996. Tegucigalpa, Honduras: ASHONPLAFA.  |  |   | X |   |   |
| Honduras      | 03 - HND | Ministry of Health (Honduras). Honduras Maternal Mortality Ratio Update 2010. Ministry of Health (Honduras), 2013.                                                                                                                                          |  |   |   |   | X |
| Honduras      | 04 - HND | World Health Organisation (WHO). WHO Mortality Database Version February 2014. Geneva, Switzerland: World Health Organisation (WHO), 2014.                                                                                                                  |  | X |   |   |   |
| Honduras      | 05 - HND | World Health Organisation (WHO). WHO Mortality Database Version July 2012. Geneva, Switzerland: World Health Organisation (WHO), 2012.                                                                                                                      |  | X |   |   |   |
| Hungary       | 01 - HUN | World Health Organisation (WHO). WHO Mortality Database Version February 2014. Geneva, Switzerland: World Health Organisation (WHO), 2014.                                                                                                                  |  | X |   |   |   |
| Hungary       | 02 - HUN | World Health Organisation (WHO). WHO Mortality Database Version July 2012. Geneva, Switzerland: World Health Organisation (WHO), 2012.                                                                                                                      |  | X |   |   |   |
| Iceland       | 01 - ISL | Statistics Iceland. Iceland Deaths by Sex, Age, and Main Causes of Death. Reykjavík, Iceland: Statistics Iceland.                                                                                                                                           |  |   |   | X |   |
| Iceland       | 02 - ISL | World Health Organisation (WHO). WHO Mortality Database Version February 2014. Geneva, Switzerland: World Health Organisation (WHO), 2014.                                                                                                                  |  | X |   |   |   |
| Iceland       | 03 - ISL | World Health Organisation (WHO). WHO Mortality Database Version July 2012. Geneva, Switzerland: World Health Organisation (WHO), 2012.                                                                                                                      |  | X |   |   |   |
| India         | 01 - IND | Barnett S, Nair N, Tripathy P, Borghi J, Rath S, Costello A. A prospective key informant surveillance system to measure maternal mortality -- findings from indigenous populations in Jharkhand and Orissa, India. BMC Pregnancy Childbirth. 2008; 8(6): 6. |  |   |   |   | X |
| India         | 02 - IND | Bhat PN, Navaneetham K, Rajan SI. Maternal mortality in India: estimates from a regression model. Stud Fam Plann. 1995; 26(4): 217-32.                                                                                                                      |  |   |   |   | X |
| India         | 03 - IND | Bhatia JC. Levels and causes of maternal mortality in southern India. Stud Fam Plann. 1993; 24(5): 310-8.                                                                                                                                                   |  |   |   |   | X |
| India         | 04 - IND | Byrraju Foundation, Centre for Chronic Disease Control (India), Cooperative for Assistance and Relief Everywhere (CARE), School of Population Health, University of Queensland (Australia). India - Andhra Pradesh Rural Health Initiative.                 |  |   |   |   | X |

|       |          |                                                                                                                                                                                                                                                                                                        |  |  |  |   |   |
|-------|----------|--------------------------------------------------------------------------------------------------------------------------------------------------------------------------------------------------------------------------------------------------------------------------------------------------------|--|--|--|---|---|
| India | 05 - IND | Dongre A, Singh A, Deshmukh P, Garg B. A community based cross sectional study on feasibility of lay interviewers in ascertaining causes of adult deaths by using verbal autopsy in rural Wardha. <i>Online Journal of Health and Allied Sciences</i> . 2008; 7(4): 4.                                 |  |  |  |   | X |
| India | 06 - IND | Gajalakshmi V, Peto R, Kanaka S, Balasubramanian S. Verbal autopsy of 48 000 adult deaths attributable to medical causes in Chennai (formerly Madras), India. <i>BMC Public Health</i> . 2002; 2: 7.                                                                                                   |  |  |  |   | X |
| India | 07 - IND | Gupta N, Kumar S, Saxena NC, Nandan D, Saxena BN. Maternal mortality in seven districts of Uttar Pradesh - an ICMR task force study. <i>Indian J Public Health</i> . 2006; 50(3): 173-8.                                                                                                               |  |  |  |   | X |
| India | 08 - IND | Gupta SD, Khanna A, Gupta R, Sharma NK, Sharma ND. Maternal mortality ratio and predictors of maternal deaths in selected desert districts in rajasthan a community-based survey and case control study. <i>Womens Health Issues</i> . 2010; 20(1): 80-5.                                              |  |  |  |   | X |
| India | 09 - IND | Indian Council of Medical Research (ICMR). <i>India Study on Causes of Death by Verbal Autopsy 2003</i> .                                                                                                                                                                                              |  |  |  |   | X |
| India | 10 - IND | Institute of Health Systems (India). <i>India Cause of Death Dataset Version 1.3 1980-1998</i> . Hyderabad, India: Institute of Health Systems (India), 2002.                                                                                                                                          |  |  |  |   | X |
| India | 11 - IND | International Institute for Population Sciences (IIPS) (India), Macro International, Inc. <i>India Demographic and Health Survey 1998-1999</i> . Calverton, United States: Macro International, Inc.                                                                                                   |  |  |  |   | X |
| India | 12 - IND | International Institute for Population Sciences (IIPS). <i>India Demographic and Health Survey 1992-1993</i> . Bombay, India: International Institute for Population Sciences (IIPS).                                                                                                                  |  |  |  |   | X |
| India | 13 - IND | International Institute for Population Sciences (India). <i>India District Level Household Survey 2002-2004</i> . Mumbai, India: International Institute for Population Sciences (India).                                                                                                              |  |  |  | X |   |
| India | 14 - IND | International Institute for Population Sciences (India). <i>India District Level Household Survey 2007-2008</i> . Mumbai, India: International Institute for Population Sciences (India), 2010.                                                                                                        |  |  |  | X |   |
| India | 15 - IND | Iyengar K, Iyengar SD, Suhalka V, Dashora K. Pregnancy-related deaths in rural Rajasthan, India: exploring causes, context, and care-seeking through verbal autopsy. <i>J Health Popul Nutr</i> . 2009; 27(2): 293-302.                                                                                |  |  |  |   | X |
| India | 16 - IND | Joshi R, Cardona M, Iyengar S, Sukumar A, Raju CR, Raju KR, Raju K, Reddy KS, Lopez A, Neal B. Chronic diseases now a leading cause of death in rural India – mortality data from the Andhra Pradesh Rural Health Initiative. <i>Int J Epidemiol</i> . 2006; 35(6): 1522-9.                            |  |  |  |   | X |
| India | 17 - IND | Joshi R, Praveen D, Chow C, Neal B. Effects on the estimated cause-specific mortality fraction of providing physician reviewers with different formats of verbal autopsy data. <i>Popul Health Metr</i> . 2011; 9(33): 33.                                                                             |  |  |  |   | X |
| India | 18 - IND | Kakrani VA, Pratinidhi AK, Gupte AM. A study of registration of deaths at primary health centre--with special reference to verbal autopsy method. <i>Indian J Med Sci</i> . 1996; 50(6): 196-200.                                                                                                      |  |  |  |   | X |
| India | 19 - IND | Kanungo S, Tsuzuki A, Deen JL, Lopez AL, Rajendran K, Manna B, Sur D, Kim DR, Gupta VK, Ochiai RL, Ali M, von Seidlein L, Bhattacharya SK, Clemens JD. Use of verbal autopsy to determine mortality patterns in an urban slum in Kolkata, India. <i>Bull World Health Organ</i> . 2010; 88(9): 667-74. |  |  |  |   | X |
| India | 20 - IND | Kumar R, Sharma AK, Barik S, Kumar V. Maternal mortality inquiry in a rural community of north India. <i>Int J Gynaecol Obstet</i> . 1989; 29(4): 313-9.                                                                                                                                               |  |  |  |   | X |

|       |          |                                                                                                                                                                                                                                                                                                                                                                |  |   |  |  |   |
|-------|----------|----------------------------------------------------------------------------------------------------------------------------------------------------------------------------------------------------------------------------------------------------------------------------------------------------------------------------------------------------------------|--|---|--|--|---|
| India | 21 - IND | Kumar V, Datta N, Wadhwa SS, Singhi S. Morbidity and mortality in diarrhea in rural Haryana Indian. Indian J Pediatr. 1985; 52(418): 455-61.                                                                                                                                                                                                                   |  |   |  |  | X |
| India | 22 - IND | Ministry of Health and Family Welfare (India), Office of the Registrar General and Census Commissioner (India). India Special Survey of Deaths 2004.                                                                                                                                                                                                           |  |   |  |  | X |
| India | 23 - IND | Office of the Registrar General & Census Commissioner (India), Centre for Global Health Research, University of Toronto (Canada). India SRS Maternal Mortality: Trends, Causes and Risk Factors 1997-2003. New Delhi, India: Office of the Registrar General & Census Commissioner (India), Centre for Global Health Research, University of Toronto (Canada). |  |   |  |  | X |
| India | 24 - IND | Office of the Registrar General & Census Commissioner (India). India SRS Bulletin 1997. New Delhi, India: Office of the Registrar General & Census Commissioner (India), 1999.                                                                                                                                                                                 |  |   |  |  | X |
| India | 25 - IND | Office of the Registrar General & Census Commissioner (India). India SRS Bulletin 2000. New Delhi, India: Office of the Registrar General & Census Commissioner (India).                                                                                                                                                                                       |  |   |  |  | X |
| India | 26 - IND | Office of the Registrar General & Census Commissioner (India). India SRS Bulletin 2005. New Delhi, India: Office of the Registrar General & Census Commissioner (India), 2006.                                                                                                                                                                                 |  |   |  |  | X |
| India | 27 - IND | Office of the Registrar General & Census Commissioner (India). India SRS Compendium of Fertility and Mortality Indicators 1971-2007. New Delhi, India: Office of the Registrar General & Census Commissioner (India).                                                                                                                                          |  |   |  |  | X |
| India | 28 - IND | Office of the Registrar General & Census Commissioner (India). India SRS Special Bulletin on Maternal Mortality 2007-2009. New Delhi, India: Office of the Registrar General & Census Commissioner (India).                                                                                                                                                    |  |   |  |  | X |
| India | 29 - IND | Office of the Registrar General & Census Commissioner (India). India Vital Statistics 1980. New Delhi, India: Office of the Registrar General & Census Commissioner (India).                                                                                                                                                                                   |  | X |  |  |   |
| India | 30 - IND | Office of the Registrar General & Census Commissioner (India). India Vital Statistics 1981. New Delhi, India: Office of the Registrar General & Census Commissioner (India).                                                                                                                                                                                   |  | X |  |  |   |
| India | 31 - IND | Office of the Registrar General & Census Commissioner (India). India Vital Statistics 1982. New Delhi, India: Office of the Registrar General & Census Commissioner (India).                                                                                                                                                                                   |  | X |  |  |   |
| India | 32 - IND | Office of the Registrar General & Census Commissioner (India). India Vital Statistics 1983. New Delhi, India: Office of the Registrar General & Census Commissioner (India).                                                                                                                                                                                   |  | X |  |  |   |
| India | 33 - IND | Office of the Registrar General & Census Commissioner (India). India Vital Statistics 1986. New Delhi, India: Office of the Registrar General & Census Commissioner (India).                                                                                                                                                                                   |  | X |  |  |   |
| India | 34 - IND | Office of the Registrar General & Census Commissioner (India). India Vital Statistics 1987. New Delhi, India: Office of the Registrar General & Census Commissioner (India).                                                                                                                                                                                   |  | X |  |  |   |
| India | 35 - IND | Office of the Registrar General & Census Commissioner (India). India Vital Statistics 1988. New Delhi, India: Office of the Registrar General & Census Commissioner (India).                                                                                                                                                                                   |  | X |  |  |   |
| India | 36 - IND | Office of the Registrar General & Census Commissioner (India). India Vital Statistics 1989. New Delhi, India: Office of the Registrar General & Census Commissioner (India).                                                                                                                                                                                   |  | X |  |  |   |
| India | 37 - IND | Office of the Registrar General and Census Commissioner (India). India MCD Vital Statistics - Deaths 1990-1998.                                                                                                                                                                                                                                                |  | X |  |  |   |
| India | 38 - IND | Office of the Registrar General and Census Commissioner (India). India MCD Vital Statistics - Deaths 1999-2001.                                                                                                                                                                                                                                                |  | X |  |  |   |



|           |          |                                                                                                                                                                                                                                                                                                             |   |   |   |   |   |
|-----------|----------|-------------------------------------------------------------------------------------------------------------------------------------------------------------------------------------------------------------------------------------------------------------------------------------------------------------|---|---|---|---|---|
| India     | 39 - IND | Office of the Registrar General and Census Commissioner (India). India Medical Certification of Cause of Death Report 2002. New Delhi, India: Office of the Registrar General and Census Commissioner (India), 2009.                                                                                        |   | X |   |   |   |
| India     | 40 - IND | Office of the Registrar General and Census Commissioner (India). India Medical Certification of Cause of Death Report 2003. New Delhi, India: Office of the Registrar General and Census Commissioner (India), 2009.                                                                                        |   | X |   |   |   |
| India     | 41 - IND | Office of the Registrar General and Census Commissioner (India). India Medical Certification of Cause of Death Report 2004. New Delhi, India: Office of the Registrar General and Census Commissioner (India), 2009.                                                                                        |   | X |   |   |   |
| India     | 42 - IND | Office of the Registrar General and Census Commissioner (India). India Medical Certification of Cause of Death Report 2005. New Delhi, India: Office of the Registrar General and Census Commissioner (India), 2012.                                                                                        |   | X |   |   |   |
| India     | 43 - IND | Office of the Registrar General and Census Commissioner (India). India Medical Certification of Cause of Death Report 2006. New Delhi, India: Office of the Registrar General and Census Commissioner (India), 2012.                                                                                        |   | X |   |   |   |
| India     | 44 - IND | Office of the Registrar General and Census Commissioner (India). India Medical Certification of Cause of Death Report 2008. New Delhi, India: Office of the Registrar General and Census Commissioner (India), 2013.                                                                                        |   | X |   |   |   |
| India     | 45 - IND | Singh RB, Fedacko J, Vargova V, Kumar A, Mohan V, Pella D, De Meester F, Wilson D. Singh's verbal autopsy questionnaire for the assessment of causes of death, social autopsy, tobacco autopsy and dietary autopsy, based on medical records and interview. Acta Cardiol. 2011; 66(4): 471-81.              |   |   |   |   | X |
| India     | 46 - IND | Soman CR, Kutty VR, Safraj S, Vijayakumar K, Rajamohan K, Ajayan K. All-cause mortality and cardiovascular mortality in Kerala state of India: results from a 5-year follow-up of 161,942 rural community dwelling adults. Asia Pac J Public Health. 2011; 23(6): 896-903.                                  |   |   |   |   | X |
| Indonesia | 01 - IDN | Fortney JA, Susanti I, Gadalla S, Saleh S, Rogers SM, Potts M. Reproductive Mortality in Two Developing Countries. Am J Public Health. 1986; 76(2): 134-8.                                                                                                                                                  |   |   |   |   | X |
| Indonesia | 02 - IDN | Macro International, Inc, Ministry of Health (Indonesia), National Family Planning Coordinating Board (Indonesia), Statistics Indonesia. Indonesia Demographic and Health Survey 1987, 1991, 1994, 1997, 2002-2003, 2007.                                                                                   |   |   | X |   |   |
| Indonesia | 03 - IDN | National Institute of Health Research and Development (NIHRD), Ministry of Health (Indonesia). Indonesia Sample Registration System 2012, Indonesia Cause of Death Survey 2010-2011, Indonesia Mortality Registration System Strengthening Project (IMRSSP), and Indonesia Basic Health Research 2007-2008. |   |   |   |   | X |
| Indonesia | 04 - IDN | Statistics Indonesia. Indonesia National Socioeconomic Survey 2004. Jakarta, Indonesia: Statistics Indonesia.                                                                                                                                                                                               |   |   |   | X |   |
| Indonesia | 05 - IDN | Statistics Indonesia. Indonesia National Socioeconomic Survey 2007. Jakarta, Indonesia: Statistics Indonesia.                                                                                                                                                                                               |   |   |   | X |   |
| Indonesia | 06 - IDN | Supratikto G, Wirth ME, Achadi E, Cohen S, Ronsmans C. A district-based audit of the causes and circumstances of maternal deaths in South Kalimantan, Indonesia. Bull World Health Organ. 2002; 80(3): 228-34.                                                                                              |   |   |   |   | X |
| Iran      | 01 - IRN | Ministry of Health and Medical Education (Iran). Iran Maternal Mortality Report 2012-2013.                                                                                                                                                                                                                  | X |   |   |   |   |

|         |          |                                                                                                                                                                                                                            |   |   |   |   |   |
|---------|----------|----------------------------------------------------------------------------------------------------------------------------------------------------------------------------------------------------------------------------|---|---|---|---|---|
| Iran    | 02 - IRN | Ministry of Health and Medical Education (Iran). Iran Vital Registration - Deaths 2007.                                                                                                                                    |   | X |   |   |   |
| Iran    | 03 - IRN | Ministry of Health and Medical Education (Iran). Iran Vital Registration - Deaths 2008.                                                                                                                                    |   | X |   |   |   |
| Iran    | 04 - IRN | Ministry of Health and Medical Education (Iran). Iran Vital Registration - Deaths 2009.                                                                                                                                    |   | X |   |   |   |
| Iran    | 05 - IRN | Ministry of Health and Medical Education (Iran). Iran Vital Registration - Deaths 2010.                                                                                                                                    |   | X |   |   |   |
| Iran    | 06 - IRN | Naghavi M. National Estimates for Maternal Mortality: An Analysis Based on Reproductive Age Mortality Study (RAMOS) in Iran. Tehran, Iran: Ministry of Health and Medical Education (Iran), 1996.                          |   |   |   |   | X |
| Iran    | 07 - IRN | World Health Organisation (WHO). WHO Mortality Database Version July 2012. Geneva, Switzerland: World Health Organisation (WHO), 2012.                                                                                     |   | X |   |   |   |
| Iraq    | 01 - IRQ | Central Organisation for Statistics and Information Technology (Iraq), Ministry of Health (Iraq), United Nations Children's Fund (UNICEF), World Health Organisation (WHO). Iraq Child and Maternal Mortality Survey 1999. |   |   |   | X |   |
| Iraq    | 02 - IRQ | World Health Organisation (WHO). WHO Mortality Database Version February 2014. Geneva, Switzerland: World Health Organisation (WHO), 2014.                                                                                 |   | X |   |   |   |
| Ireland | 01 - IRL | World Health Organisation (WHO). WHO Mortality Database Version February 2014. Geneva, Switzerland: World Health Organisation (WHO), 2014.                                                                                 |   | X |   |   |   |
| Ireland | 02 - IRL | World Health Organisation (WHO). WHO Mortality Database Version July 2012. Geneva, Switzerland: World Health Organisation (WHO), 2012.                                                                                     |   | X |   |   |   |
| Israel  | 01 - ISR | World Health Organisation (WHO). WHO Mortality Database Version February 2014. Geneva, Switzerland: World Health Organisation (WHO), 2014.                                                                                 |   | X |   |   |   |
| Israel  | 02 - ISR | World Health Organisation (WHO). WHO Mortality Database Version July 2012. Geneva, Switzerland: World Health Organisation (WHO), 2012.                                                                                     |   | X |   |   |   |
| Italy   | 01 - ITA | World Health Organisation (WHO). WHO Mortality Database Version February 2014. Geneva, Switzerland: World Health Organisation (WHO), 2014.                                                                                 |   | X |   |   |   |
| Italy   | 02 - ITA | World Health Organisation (WHO). WHO Mortality Database Version July 2012. Geneva, Switzerland: World Health Organisation (WHO), 2012.                                                                                     |   | X |   |   |   |
| Jamaica | 01 - JAM | Ministry of Health (Jamaica). Jamaica Maternal Mortality Surveillance System 1998-2008.                                                                                                                                    | X |   |   |   |   |
| Jamaica | 02 - JAM | World Health Organisation (WHO). WHO Mortality Database Version February 2014. Geneva, Switzerland: World Health Organisation (WHO), 2014.                                                                                 |   | X |   |   |   |
| Jamaica | 03 - JAM | World Health Organisation (WHO). WHO Mortality Database Version July 2012. Geneva, Switzerland: World Health Organisation (WHO), 2012.                                                                                     |   | X |   |   |   |
| Japan   | 01 - JPN | World Health Organisation (WHO). WHO Mortality Database Version February 2014. Geneva, Switzerland: World Health Organisation (WHO), 2014.                                                                                 |   | X |   |   |   |
| Japan   | 02 - JPN | World Health Organisation (WHO). WHO Mortality Database Version July 2012. Geneva, Switzerland: World Health Organisation (WHO), 2012.                                                                                     |   | X |   |   |   |
| Jordan  | 01 - JOR | Department of Statistics (Jordan), Macro International, Inc, Ministry of Planning (Jordan). Jordan Demographic and Health Survey 1990, 1997.                                                                               |   |   | X |   |   |

|               |          |                                                                                                                                                                                                                                                                                                                                                                                                                                                |   |  |   |   |   |
|---------------|----------|------------------------------------------------------------------------------------------------------------------------------------------------------------------------------------------------------------------------------------------------------------------------------------------------------------------------------------------------------------------------------------------------------------------------------------------------|---|--|---|---|---|
| Jordan        | 02 - JOR | Khoury SA, Massad D, Fardous T. Mortality and causes of death in Jordan 1995-96: assessment by verbal autopsy. Bull World Health Organ. 1999; 77(8): 641-50.                                                                                                                                                                                                                                                                                   |   |  |   |   | X |
| Jordan        | 03 - JOR | Ministry of Health (Jordan). Jordan Reproductive Age Mortality Survey 2007.                                                                                                                                                                                                                                                                                                                                                                    |   |  |   |   | X |
| Jordan        | 04 - JOR | World Health Organisation (WHO). WHO Mortality Database Version February 2014. Geneva, Switzerland: World Health Organisation (WHO), 2014.                                                                                                                                                                                                                                                                                                     | X |  |   |   |   |
| Kazakhstan    | 01 - KAZ | World Health Organisation (WHO). WHO Mortality Database Version February 2014. Geneva, Switzerland: World Health Organisation (WHO), 2014.                                                                                                                                                                                                                                                                                                     | X |  |   |   |   |
| Kazakhstan    | 02 - KAZ | World Health Organisation (WHO). WHO Mortality Database Version July 2012. Geneva, Switzerland: World Health Organisation (WHO), 2012.                                                                                                                                                                                                                                                                                                         | X |  |   |   |   |
| Kenya         | 01 - KEN | Boerma JT, Mati JK. Identifying maternal mortality through networking: results from coastal Kenya. Stud Fam Plann. 1989; 20(5): 245-53.                                                                                                                                                                                                                                                                                                        |   |  |   |   | X |
| Kenya         | 02 - KEN | Centers for Disease Control and Prevention (CDC), ICF Macro, Kenya Medical Research Institute (KEMRI), Kenya National Bureau of Statistics, Ministry of Public Health and Sanitation (Kenya), National AIDS and STI Control Program (Kenya), National Aids Control Council (NACC), National Coordinating Agency for Population and Development (Kenya). Kenya Demographic and Health Survey 1988-1989, 1993, 1998, 2003, 2008-2009. ICF Macro. |   |  | X |   |   |
| Kenya         | 03 - KEN | INDEPTH. Kenya - Kisumu Health and Demographic Surveillance System.                                                                                                                                                                                                                                                                                                                                                                            |   |  |   |   | X |
| Kenya         | 04 - KEN | INDEPTH. Kenya - Nairobi Health and Demographic Surveillance System.                                                                                                                                                                                                                                                                                                                                                                           |   |  |   |   | X |
| Kenya         | 05 - KEN | Kenya National Bureau of Statistics. Kenya Population and Housing Census 2009.                                                                                                                                                                                                                                                                                                                                                                 |   |  |   | X |   |
| Kenya         | 06 - KEN | van Eijk AM, Adazu K, Ofware P, Vulule J, Hamel M, Slutsker L. Causes of deaths using verbal autopsy among adolescents and adults in rural western Kenya. Trop Med Int Health. 2008; 13(10): 1314-24.                                                                                                                                                                                                                                          |   |  |   |   | X |
| Kiribati      | 01 - KIR | World Health Organisation (WHO). WHO Mortality Database Version February 2014. Geneva, Switzerland: World Health Organisation (WHO), 2014.                                                                                                                                                                                                                                                                                                     | X |  |   |   |   |
| Kiribati      | 02 - KIR | World Health Organisation (WHO). WHO Mortality Database Version July 2012. Geneva, Switzerland: World Health Organisation (WHO), 2012.                                                                                                                                                                                                                                                                                                         | X |  |   |   |   |
| Kuwait        | 01 - KWT | World Health Organisation (WHO). WHO Mortality Database Version February 2014. Geneva, Switzerland: World Health Organisation (WHO), 2014.                                                                                                                                                                                                                                                                                                     | X |  |   |   |   |
| Kuwait        | 02 - KWT | World Health Organisation (WHO). WHO Mortality Database Version July 2012. Geneva, Switzerland: World Health Organisation (WHO), 2012.                                                                                                                                                                                                                                                                                                         | X |  |   |   |   |
| KwaZulu-Natal | 01 - ZKN | Department of Home Affairs (South Africa), Statistics South Africa. South Africa Mortality and Causes of Death 1997-2005. Pretoria, South Africa: Statistics South Africa.                                                                                                                                                                                                                                                                     | X |  |   |   |   |
| Kyrgyzstan    | 01 - KGZ | World Health Organisation (WHO). WHO Mortality Database Version February 2014. Geneva, Switzerland: World Health Organisation (WHO), 2014.                                                                                                                                                                                                                                                                                                     | X |  |   |   |   |
| Laos          | 01 - LAO | Fauveau VA. The Lao People's Democratic Republic: maternal mortality and female mortality: determining causes of deaths. World Health Stat Q. 1995; 48(1): 44-6.                                                                                                                                                                                                                                                                               |   |  |   |   | X |
| Latvia        | 01 - LVA | World Health Organisation (WHO). WHO Mortality Database Version February 2014. Geneva, Switzerland: World Health Organisation (WHO), 2014.                                                                                                                                                                                                                                                                                                     | X |  |   |   |   |

|            |          |                                                                                                                                                                                                                                                                             |   |   |   |   |   |
|------------|----------|-----------------------------------------------------------------------------------------------------------------------------------------------------------------------------------------------------------------------------------------------------------------------------|---|---|---|---|---|
| Lebanon    | 01 - LBN | Ministry of Public Health (Lebanon), Saint Joseph University (Lebanon). Lebanon Reproductive Age Mortality Survey 2008.                                                                                                                                                     | X |   |   |   |   |
| Lebanon    | 02 - LBN | Osman H, Campbell OM, Sinno D, Zarwi R, Nassar AH. Facility-based audit of maternal mortality in Lebanon: A feasibility study. Acta Obstet Gynecol Scand. 2009; 88(12): 1338-44.                                                                                            |   |   |   |   | X |
| Lesotho    | 01 - LSO | Bureau of Statistics (Lesotho), ICF Macro, Ministry of Health and Social Welfare (Lesotho). Lesotho Demographic and Health Survey 2004-2005, 2009-2010. ICF Macro.                                                                                                          |   |   | X |   |   |
| Lesotho    | 02 - LSO | Lesotho Population and Housing Census 1996.                                                                                                                                                                                                                                 |   |   |   | X |   |
| Liberia    | 01 - LBR | Liberia Institute for Statistics and Geo-information Services (LISGIS), Macro International, Inc, Ministry of Planning and Economic Affairs (Liberia). Liberia Demographic and Health Survey 1986, 2006-2007.                                                               |   |   | X |   |   |
| Liberia    | 02 - LBR | Pacqué-Margolis S, Pacqué M, Dukuly Z, Boateng J, Taylor HR.. Application of the verbal autopsy during a clinical trial. Soc Sci Med. 1990; 31(5): 585-91.                                                                                                                  |   |   |   |   | X |
| Libya      | 01 - LBY | General Information Authority (Libya). Libya Vital Statistics 2006.                                                                                                                                                                                                         |   | X |   |   |   |
| Libya      | 02 - LBY | General Information Authority (Libya). Libya Vital Statistics 2007.                                                                                                                                                                                                         |   | X |   |   |   |
| Libya      | 03 - LBY | General Information Authority (Libya). Libya Vital Statistics 2008.                                                                                                                                                                                                         |   | X |   |   |   |
| Limpopo    | 01 - ZLI | Department of Home Affairs (South Africa), Statistics South Africa. South Africa Mortality and Causes of Death 1997-2005. Pretoria, South Africa: Statistics South Africa.                                                                                                  |   | X |   |   |   |
| Lithuania  | 01 - LTU | World Health Organisation (WHO). WHO Mortality Database Version February 2014. Geneva, Switzerland: World Health Organisation (WHO), 2014.                                                                                                                                  |   | X |   |   |   |
| Lithuania  | 02 - LTU | World Health Organisation (WHO). WHO Mortality Database Version July 2012. Geneva, Switzerland: World Health Organisation (WHO), 2012.                                                                                                                                      |   | X |   |   |   |
| Luxembourg | 01 - LUX | World Health Organisation (WHO). WHO Mortality Database Version February 2014. Geneva, Switzerland: World Health Organisation (WHO), 2014.                                                                                                                                  |   | X |   |   |   |
| Luxembourg | 02 - LUX | World Health Organisation (WHO). WHO Mortality Database Version July 2012. Geneva, Switzerland: World Health Organisation (WHO), 2012.                                                                                                                                      |   | X |   |   |   |
| Macedonia  | 01 - MKD | World Health Organisation (WHO). WHO Mortality Database Version February 2014. Geneva, Switzerland: World Health Organisation (WHO), 2014.                                                                                                                                  |   | X |   |   |   |
| Macedonia  | 02 - MKD | World Health Organisation (WHO). WHO Mortality Database Version July 2012. Geneva, Switzerland: World Health Organisation (WHO), 2012.                                                                                                                                      |   | X |   |   |   |
| Madagascar | 01 - MDG | Department of Applied Research for Development (Madagascar), Macro International, Inc, National Institute of Statistics (Madagascar). Madagascar Demographic and Health Survey 1992, 1997, 2003-2004, 2008-2009.                                                            |   |   | X |   |   |
| Madagascar | 02 - MDG | Population and Development Research Center (CEPED) (France). Madagascar - Antananorivo Mortality Report 1984-1995.                                                                                                                                                          |   | X |   |   |   |
| Malawi     | 01 - MWI | Checchi F, Nyasulu P, Chandramohan D, Roberts B. Rates and causes of death in Chiradzulu District, Malawi, 2008: a key informant study. Trop Med Int Health. 2011; 16(3): 375-8.                                                                                            |   |   |   |   | X |
| Malawi     | 02 - MWI | Chihana M, Floyd S, Molesworth A, Crampin AC, Kayuni N, Price A, Zaba B, Jahn A, Mvula H, Dube A, Ngwira B, Glynn JR, French N. Adult mortality and probable cause of death in rural northern Malawi in the era of HIV treatment. Trop Med Int Health. 2012; 17(8): E74-83. |   |   |   |   | X |
| Malawi     | 03 - MWI | Doctor HV, Weinreb AA. Estimation of AIDS adult mortality by verbal autopsy in rural Malawi. AIDS. 2003; 17(17): 2509-13.                                                                                                                                                   |   |   |   |   | X |

|            |          |                                                                                                                                                                                                                                                                                                                      |  |   |   |   |   |
|------------|----------|----------------------------------------------------------------------------------------------------------------------------------------------------------------------------------------------------------------------------------------------------------------------------------------------------------------------|--|---|---|---|---|
| Malawi     | 04 - MWI | ICF Macro, National Statistical Office of Malawi. Malawi Demographic and Health Survey 1992, 2000, 2004-2005, 2010. ICF Macro.                                                                                                                                                                                       |  |   | X |   |   |
| Malawi     | 05 - MWI | National Statistical Office (Malawi), Minnesota Population Center. Malawi Population and Housing Census 2008 from the Integrated Public Use Microdata Series, International: [Machine-readable database]. Minneapolis: University of Minnesota, 2011.                                                                |  |   |   | X |   |
| Malawi     | 06 - MWI | National Statistical Office of Malawi. Malawi Population and Housing Census 2008. Zomba, Malawi: National Statistical Office of Malawi.                                                                                                                                                                              |  |   |   | X |   |
| Malawi     | 07 - MWI | Slutsker L, Bloland P, Steketee RW, Wirima JJ, Heymann DL, Breman JG. Infant and second-year mortality in rural Malawi: causes and descriptive epidemiology. Am J Trop Med Hyg. 1996; 55(1 Suppl): 77-81.                                                                                                            |  |   |   |   | X |
| Malaysia   | 01 - MYS | Department of Statistics (Malaysia).&nbsp;Vital Statistics: West Malaysia 1969. Kuala Lumpur, Malaysia:&nbsp;Department of Statistics (Malaysia), 1971.                                                                                                                                                              |  | X |   |   |   |
| Malaysia   | 02 - MYS | World Health Organisation (WHO). WHO Mortality Database Version February 2014. Geneva, Switzerland: World Health Organisation (WHO), 2014.                                                                                                                                                                           |  | X |   |   |   |
| Maldives   | 01 - MDV | World Health Organisation (WHO). WHO Mortality Database Version February 2014. Geneva, Switzerland: World Health Organisation (WHO), 2014.                                                                                                                                                                           |  | X |   |   |   |
| Mali       | 01 - MLI | Aa I, Grove MA, Haugsj  AH, Hinderaker SG. High maternal mortality estimated by the sisterhood method in a rural area of Mali. BMC Pregnancy Childbirth. 2011; 11(1): 56.                                                                                                                                            |  |   | X |   |   |
| Mali       | 02 - MLI | Etard JF, Kodio B, Traor  S. Assessment of maternal mortality and late maternal mortality among a cohort of pregnant women in Bamako, Mali. Br J Obstet Gynaecol. 1999; 106(1): 60-5.                                                                                                                                |  |   |   |   | X |
| Mali       | 03 - MLI | Macro International, Inc, Ministry of Health (Mali), National Directorate of Statistics and Informatics (Mali), National Directorate of Statistics and Informatics (Mali), Planning and Statistics Unit, Ministry of Health (Mali), Sahel Institute. Mali Demographic and Health Survey 1987, 1995-1996, 2001, 2006. |  |   | X |   |   |
| Mali       | 04 - MLI | Mali Population and Housing Census 2009.                                                                                                                                                                                                                                                                             |  |   |   | X |   |
| Mali       | 05 - MLI | National Institute for Demographic Studies (France), Sahel Institute. Mali Twelve Years of Urban Mortality in the Sahel 1974-1985. 1988.                                                                                                                                                                             |  | X |   |   |   |
| Malta      | 01 - MLT | World Health Organisation (WHO). WHO Mortality Database Version February 2014. Geneva, Switzerland: World Health Organisation (WHO), 2014.                                                                                                                                                                           |  | X |   |   |   |
| Malta      | 02 - MLT | World Health Organisation (WHO). WHO Mortality Database Version July 2012. Geneva, Switzerland: World Health Organisation (WHO), 2012.                                                                                                                                                                               |  | X |   |   |   |
| Mauritania | 01 - MRT | National Office of Statistics (Mauritania), Macro International, Inc. Mauritania Demographic and Health Survey 2000-2001. Calverton, United States: Macro International, Inc.                                                                                                                                        |  |   | X |   |   |
| Mauritius  | 01 - MUS | World Health Organisation (WHO). WHO Mortality Database Version February 2014. Geneva, Switzerland: World Health Organisation (WHO), 2014.                                                                                                                                                                           |  | X |   |   |   |
| Mauritius  | 02 - MUS | World Health Organisation (WHO). WHO Mortality Database Version July 2012. Geneva, Switzerland: World Health Organisation (WHO), 2012.                                                                                                                                                                               |  | X |   |   |   |
| Mexico     | 01 - MEX | Ministry of Health (Mexico), National Institute of Statistics and Geography (Mexico). Mexico Vital Registration - Deaths 1979.                                                                                                                                                                                       |  | X |   |   |   |
| Mexico     | 02 - MEX | Ministry of Health (Mexico), National Institute of Statistics and Geography (Mexico). Mexico Vital Registration - Deaths 1980.                                                                                                                                                                                       |  | X |   |   |   |



|            |          |                                                                                                                                                                                                                                                                                                     |   |   |   |   |   |
|------------|----------|-----------------------------------------------------------------------------------------------------------------------------------------------------------------------------------------------------------------------------------------------------------------------------------------------------|---|---|---|---|---|
| Mexico     | 31 - MEX | Ministry of Health (Mexico), National Institute of Statistics and Geography (Mexico). Mexico Vital Registration - Deaths 2010.                                                                                                                                                                      |   | X |   |   |   |
| Mexico     | 32 - MEX | Ministry of Health (Mexico), National Institute of Statistics and Geography (Mexico). Mexico Vital Registration - Deaths 2011.                                                                                                                                                                      |   | X |   |   |   |
| Mexico     | 33 - MEX | National Institute of Statistics and Geography (Mexico). Mexico Vital Registration - Deaths 2012.                                                                                                                                                                                                   |   | X |   |   |   |
| Mexico     | 34 - MEX | National Institute of Statistics and Geography (Mexico). Mexico Vital Statistics - Deaths 2009.                                                                                                                                                                                                     |   | X |   |   |   |
| Mexico     | 35 - MEX | World Health Organisation (WHO). WHO Mortality Database Version July 2012. Geneva, Switzerland: World Health Organisation (WHO), 2012.                                                                                                                                                              |   | X |   |   |   |
| Moldova    | 01 - MDA | World Health Organisation (WHO). WHO Mortality Database Version February 2014. Geneva, Switzerland: World Health Organisation (WHO), 2014.                                                                                                                                                          |   | X |   |   |   |
| Mongolia   | 01 - MNG | World Health Organisation (WHO). WHO Mortality Database Version February 2014. Geneva, Switzerland: World Health Organisation (WHO), 2014.                                                                                                                                                          |   | X |   |   |   |
| Montenegro | 01 - MNE | World Health Organisation (WHO). WHO Mortality Database Version February 2014. Geneva, Switzerland: World Health Organisation (WHO), 2014.                                                                                                                                                          |   | X |   |   |   |
| Morocco    | 01 - MAR | Abouchadi S, Belghiti Alaoui A, Meski FZ, De Brouwere V. Implementing a maternal mortality surveillance system in Morocco - challenges and opportunities. Trop Med Int Health. 2013; 18(3): 357-65.                                                                                                 | X |   |   |   |   |
| Morocco    | 02 - MAR | League of Arab States, Macro International, Inc, Ministry of Public Health (Morocco). Morocco Demographic and Health Survey 1987, 1992, 1995, 2003-2004.                                                                                                                                            |   |   | X |   |   |
| Morocco    | 03 - MAR | Ministry of Health (Morocco). Morocco Health in Figures 2001. Rabat, Morocco: Ministry of Health (Morocco).                                                                                                                                                                                         | X |   |   |   |   |
| Morocco    | 04 - MAR | Ministry of Health (Morocco). Morocco Health in Figures 2002. Rabat, Morocco: Ministry of Health (Morocco).                                                                                                                                                                                         | X |   |   |   |   |
| Morocco    | 05 - MAR | Ministry of Health (Morocco). Morocco Health in Figures 2003. Rabat, Morocco: Ministry of Health (Morocco).                                                                                                                                                                                         | X |   |   |   |   |
| Morocco    | 06 - MAR | Ministry of Health (Morocco). Morocco Health in Figures 2004. Rabat, Morocco: Ministry of Health (Morocco), 2004.                                                                                                                                                                                   | X |   |   |   |   |
| Morocco    | 07 - MAR | Ministry of Health (Morocco). Morocco Health in Figures 2008 - 2009. Rabat, Morocco: Ministry of Health (Morocco).                                                                                                                                                                                  | X |   |   |   |   |
| Morocco    | 08 - MAR | Ministry of Public Health (Morocco). Morocco National Survey on Causes and Circumstances of Infant and Child Deaths 1988-1989. Rabat, Morocco: Ministry of Public Health (Morocco).                                                                                                                 |   |   |   |   | X |
| Morocco    | 09 - MAR | World Health Organisation (WHO). WHO Mortality Database Version February 2014. Geneva, Switzerland: World Health Organisation (WHO), 2014.                                                                                                                                                          |   | X |   |   |   |
| Mozambique | 01 - MOZ | Centers for Disease Control and Prevention (CDC), MEASURE Evaluation Project, Carolina Population Center, University of North Carolina, Ministry of Health (Mozambique), National Statistics Institute (Mozambique), US Census Bureau. Mozambique National Survey on the Causes of Death 2007-2008. |   |   |   |   | X |
| Mozambique | 02 - MOZ | INDEPTH. Mozambique - Manhica Health and Demographic Surveillance System.                                                                                                                                                                                                                           |   |   |   |   | X |
| Mozambique | 03 - MOZ | Macro International, Inc, National Statistics Institute (Mozambique). Mozambique Demographic and Health Survey 1997, 2003.                                                                                                                                                                          |   |   | X |   |   |
| Mozambique | 04 - MOZ | Mozambique Population and Housing Survey 2007.                                                                                                                                                                                                                                                      |   |   |   | X |   |

|             |          |                                                                                                                                                                                                                                                                                                                                             |  |   |   |   |   |   |
|-------------|----------|---------------------------------------------------------------------------------------------------------------------------------------------------------------------------------------------------------------------------------------------------------------------------------------------------------------------------------------------|--|---|---|---|---|---|
| Mozambique  | 05 - MOZ | Renzaho AMN. Mortality rates, prevalence of malnutrition, and prevalence of lost pregnancies among the drought-ravaged population of Tete Province, Mozambique. Prehospital and Disaster Medicine. 2007; 22(1): 26-34.                                                                                                                      |  |   |   |   | X |   |
| Mozambique  | 06 - MOZ | Sacarlal J, Nhacolo AQ, Sigauque B, Nhalungo DA, Abacassamo F, Sacoor CN, Aide P, Machevo S, Nhampossa T, Macete EV, Bassat Q, David C, Bardaji A, Letang E, Saute F, Aponte JJ, Thompson R, Alonso PL. A 10 year study of the cause of death in children under 15 years in Manhica, Mozambique. BioMed Central Public Health. 2009; 9: 67. |  |   |   |   |   | X |
| Mozambique  | 07 - MOZ | Songane FF, Bergström S. Quality of registration of maternal deaths in Mozambique: a community-based study in rural and urban areas. Soc Sci Med. 2002; 54(1): 23-31.                                                                                                                                                                       |  |   |   |   |   | X |
| Mpumalanga  | 01 - ZMP | Department of Home Affairs (South Africa), Statistics South Africa. South Africa Mortality and Causes of Death 1997-2005. Pretoria, South Africa: Statistics South Africa.                                                                                                                                                                  |  | X |   |   |   |   |
| Myanmar     | 01 - MMR | Myint, S. Cause of death verification study in Myanmar. Presentation at: World Health Organisation Regional Office for South East Asia. Regional Consultation on Mortality Statistics. 2007; New Delhi, India.                                                                                                                              |  |   |   |   |   | X |
| Namibia     | 01 - NAM | Macro International, Inc, Ministry of Health and Social Services (Namibia). Namibia Demographic and Health Survey 1992, 2000, 2006-2007.                                                                                                                                                                                                    |  |   | X |   |   |   |
| Nepal       | 01 - NPL | ICF Macro, Ministry of Health and Population (Nepal), New ERA. Nepal Demographic and Health Survey 1996, 2001, 2006, 2011. ICF Macro.                                                                                                                                                                                                       |  |   | X |   |   |   |
| Nepal       | 02 - NPL | Maskey MK, Baral KP, Shah R, Shrestha BD, Lang J, Rothman KJ. Field test results of the motherhood method to measure maternal mortality. Indian J Med Res. 2011; 64-9.                                                                                                                                                                      |  |   | X |   |   |   |
| Nepal       | 03 - NPL | Ministry of Health and Population (Nepal), New ERA, Options UK, Safe Motherhood Network Federation (Nepal). Nepal Maternal Mortality and Morbidity Study 2008-2009. Kathmandu, Nepal: Ministry of Health and Population (Nepal).                                                                                                            |  |   |   |   |   | X |
| Nepal       | 04 - NPL | Shah R, Maskey MK. Maternal and infant mortality in Mahottari district of Nepal. J Nepal Health Res Council. 2010; 8(1): 35-9.                                                                                                                                                                                                              |  |   |   |   |   | X |
| Netherlands | 01 - NLD | World Health Organisation (WHO). WHO Mortality Database Version February 2014. Geneva, Switzerland: World Health Organisation (WHO), 2014.                                                                                                                                                                                                  |  | X |   |   |   |   |
| Netherlands | 02 - NLD | World Health Organisation (WHO). WHO Mortality Database Version July 2012. Geneva, Switzerland: World Health Organisation (WHO), 2012.                                                                                                                                                                                                      |  | X |   |   |   |   |
| New Zealand | 01 - NZL | World Health Organisation (WHO). WHO Mortality Database Version February 2014. Geneva, Switzerland: World Health Organisation (WHO), 2014.                                                                                                                                                                                                  |  | X |   |   |   |   |
| New Zealand | 02 - NZL | World Health Organisation (WHO). WHO Mortality Database Version July 2012. Geneva, Switzerland: World Health Organisation (WHO), 2012.                                                                                                                                                                                                      |  | X |   |   |   |   |
| Nicaragua   | 01 - NIC | Nicaragua Population and Housing Census 2005.                                                                                                                                                                                                                                                                                               |  |   |   | X |   |   |
| Nicaragua   | 02 - NIC | Profamilia and Division of Reproductive Health-Centers for Disease Control and Prevention (CDC). (1993) &nbsp; Nicaragua Reproductive Health Survey 1992-1993. Profamilia, Managua, Nicaragua.                                                                                                                                              |  |   | X |   |   |   |
| Nicaragua   | 03 - NIC | World Health Organisation (WHO). WHO Mortality Database Version February 2014. Geneva, Switzerland: World Health Organisation (WHO), 2014.                                                                                                                                                                                                  |  | X |   |   |   |   |
| Nicaragua   | 04 - NIC | World Health Organisation (WHO). WHO Mortality Database Version July 2012. Geneva, Switzerland: World Health Organisation (WHO), 2012.                                                                                                                                                                                                      |  | X |   |   |   |   |



|             |          |                                                                                                                                                                                                                                                                                                           |   |   |   |   |   |
|-------------|----------|-----------------------------------------------------------------------------------------------------------------------------------------------------------------------------------------------------------------------------------------------------------------------------------------------------------|---|---|---|---|---|
| Niger       | 01 - NER | CARE International, Department of Statistics and National Accounts (Niger), Macro International, Inc. Niger Demographic and Health Survey 1992, 1998, 2006.                                                                                                                                               |   |   | X |   |   |
| Nigeria     | 01 - NGA | Adegoke AA, Campbell M, Ogundeji MO, Lawoyin TO, Thomson AM. Community Study of Maternal Mortality in South West Nigeria: How Applicable is the Sisterhood Method. <i>Matern Child Health J.</i> 2013; 17(2): 319-29.                                                                                     |   |   | X |   |   |
| Nigeria     | 02 - NGA | Federal Office of Statistics (Nigeria), Macro International, Inc, National Population Commission of Nigeria, UK Department for International Development (DFID), United Nations Children's Fund (UNICEF), United Nations Population Fund (UNFPA). Nigeria Demographic and Health Survey 1990, 2003, 2008. |   |   | X |   |   |
| Nigeria     | 03 - NGA | Lawoyin TO. Infant and maternal deaths in rural south west Nigeria: a prospective study. <i>Afr J Med Med Sci.</i> 2007; 36(3): 235-41.                                                                                                                                                                   |   |   |   |   | X |
| Nigeria     | 04 - NGA | National Population Commission of Nigeria, United Nations Children's Fund (UNICEF). Nigeria Report of Livebirths, Deaths and Stillbirths 1994-2007. Abuja, Nigeria: National Population Commission of Nigeria, 2008.                                                                                      |   | X |   |   |   |
| Nigeria     | 05 - NGA | Oye-Adeniran BA, Odeyemi KA, Gbadegesin A, Ekanem EE, Osilaja OK, Akin-Adenekan O, Umoh AV. The use of the sisterhood method for estimating maternal mortality ratio in Lagos state, Nigeria. <i>J Obstet Gynaecol.</i> 2011; 31(4): 315-9.                                                               |   |   | X |   |   |
| North Korea | 01 - PRK | Central Bureau of Statistics (North Korea). Korea, North Population Census 2008.                                                                                                                                                                                                                          |   |   |   | X |   |
| Norway      | 01 - NOR | World Health Organisation (WHO). WHO Mortality Database Version February 2014. Geneva, Switzerland: World Health Organisation (WHO), 2014.                                                                                                                                                                |   | X |   |   |   |
| Norway      | 02 - NOR | World Health Organisation (WHO). WHO Mortality Database Version July 2012. Geneva, Switzerland: World Health Organisation (WHO), 2012.                                                                                                                                                                    |   | X |   |   |   |
| Oman        | 01 - OMN | World Health Organisation (WHO). WHO Mortality Database Version February 2014. Geneva, Switzerland: World Health Organisation (WHO), 2014.                                                                                                                                                                |   | X |   |   |   |
| Oman        | 02 - OMN | World Health Organisation (WHO). WHO Mortality Database Version July 2012. Geneva, Switzerland: World Health Organisation (WHO), 2012.                                                                                                                                                                    |   | X |   |   |   |
| Pakistan    | 01 - PAK | Federal Bureau of Statistics (Pakistan). Pakistan Demographic Survey 1993-1994.                                                                                                                                                                                                                           |   |   |   | X |   |
| Pakistan    | 02 - PAK | Fikree FF, Midhet F, Sadruddin S, Berendes WH. Maternal mortality in different Pakistani sites: ratios, clinical causes and determinants. <i>Acta Obstet Gynecol Scand.</i> 1997; 76(7): 637-645.                                                                                                         |   |   |   |   | X |
| Pakistan    | 03 - PAK | National Institute of Population Studies (NIPS) (Pakistan), Macro International, Inc. Pakistan Demographic and Health Survey 2006-2007. Calverton, United States: Macro International, Inc.                                                                                                               |   |   |   |   | X |
| Pakistan    | 04 - PAK | Nisar N, Sohoo NA. Maternal mortality in rural community: a challenge for achieving millennium development goal. <i>J Pak Med Assoc.</i> 2010; 60(1): 20-4.                                                                                                                                               | X |   |   |   |   |
| Palestine   | 01 - PSE | Al-Adili N, Johansson A, Bergstrom S. Maternal mortality among Palestinian women in the West Bank. <i>Int J Gynaecol Obstet.</i> 2006; 93(2): 164-70.                                                                                                                                                     |   |   |   |   | X |
| Palestine   | 02 - PSE | Ministry of Health (Palestine). Palestine Report on Maternal Mortality 2008-2009. Nablus, Palestine: Ministry of Health (Palestine).                                                                                                                                                                      | X |   |   |   |   |
| Palestine   | 03 - PSE | World Health Organisation (WHO). WHO Mortality Database Version February 2014. Geneva, Switzerland: World Health Organisation (WHO), 2014.                                                                                                                                                                |   | X |   |   |   |

|                  |          |                                                                                                                                                                                                                                          |   |   |   |   |   |
|------------------|----------|------------------------------------------------------------------------------------------------------------------------------------------------------------------------------------------------------------------------------------------|---|---|---|---|---|
| Panama           | 01 - PAN | World Health Organisation (WHO). WHO Mortality Database Version February 2014. Geneva, Switzerland: World Health Organisation (WHO), 2014.                                                                                               |   | X |   |   |   |
| Panama           | 02 - PAN | World Health Organisation (WHO). WHO Mortality Database Version July 2012. Geneva, Switzerland: World Health Organisation (WHO), 2012.                                                                                                   |   | X |   |   |   |
| Papua New Guinea | 01 - PNG | Lehmann D. Demography and causes of death among the Huli in the Tari Basin. P N G Med J. 2002; 45(1-2): 51-62.                                                                                                                           |   |   |   |   | X |
| Papua New Guinea | 02 - PNG | Lehmann D. Mortality and morbidity from acute lower respiratory tract infections in Tari, Southern Highlands Province 1977-1983. P N G Med J. 1991; 34(3): 174-84.                                                                       |   |   |   |   | X |
| Papua New Guinea | 03 - PNG | Moir JS, Garner PA, Heywood PF, Alpers MP. Mortality in a rural area of Madang Province, Papua New Guinea. Ann Trop Med Parasitol. 1989; 83(3): 305-19.                                                                                  |   |   |   |   | X |
| Papua New Guinea | 04 - PNG | World Health Organisation (WHO). WHO Mortality Database Version February 2014. Geneva, Switzerland: World Health Organisation (WHO), 2014.                                                                                               |   | X |   |   |   |
| Papua New Guinea | 05 - PNG | World Health Organisation (WHO). WHO Mortality Database Version July 2012. Geneva, Switzerland: World Health Organisation (WHO), 2012.                                                                                                   |   | X |   |   |   |
| Paraguay         | 01 - PRY | Department of Statistics, Surveys and Censuses (Paraguay). Paraguay Population and Housing Census 2002.                                                                                                                                  |   |   |   | X |   |
| Paraguay         | 02 - PRY | Division of Reproductive Health-Centers for Disease Control and Prevention (CDC). Paraguay Reproductive Health Survey 1995-1996, 1998. Asunción, Paraguay: Paraguayan Center for Population Studies (CEPEP).                             |   |   | X |   |   |
| Paraguay         | 03 - PRY | World Health Organisation (WHO). WHO Mortality Database Version February 2014. Geneva, Switzerland: World Health Organisation (WHO), 2014.                                                                                               |   | X |   |   |   |
| Paraguay         | 04 - PRY | World Health Organisation (WHO). WHO Mortality Database Version July 2012. Geneva, Switzerland: World Health Organisation (WHO), 2012.                                                                                                   |   | X |   |   |   |
| Peru             | 01 - PER | National Institute of Statistics and Informatics (INEI) (Peru). Peru Demographic and Health Survey 1986, 1991-1992, 1996, 2000, 2004-2008.                                                                                               |   |   | X |   |   |
| Peru             | 02 - PER | World Health Organisation (WHO). WHO Mortality Database Version February 2014. Geneva, Switzerland: World Health Organisation (WHO), 2014.                                                                                               |   | X |   |   |   |
| Peru             | 03 - PER | World Health Organisation (WHO). WHO Mortality Database Version July 2012. Geneva, Switzerland: World Health Organisation (WHO), 2012.                                                                                                   |   | X |   |   |   |
| Philippines      | 01 - PHL | Department of Health (Philippines), Macro International, Inc, National Statistics Office (Philippines). Philippines Demographic and Health Survey 1998, 2003, 2008.                                                                      |   |   | X |   |   |
| Philippines      | 02 - PHL | Garces RG, Sobel HL, Pabellon JA, Lopez JM Jr, de Quiroz Castro M, Nyunt-U S. A comparison of vital registration and reproductive-age mortality survey in Bukidnon, Philippines, 2008. Int J Gynaecol Obstet. 2012; 119(2): 121-4.       |   |   |   |   | X |
| Philippines      | 03 - PHL | National Epidemiology Center, Department of Health (Philippines). Philippines Field Health Service Information System (FHSIS) Annual Report 2006. Manila, Philippines: National Epidemiology Center, Department of Health (Philippines). | X |   |   |   |   |
| Philippines      | 04 - PHL | National Epidemiology Center, Department of Health (Philippines). Philippines Field Health Service Information System (FHSIS) Annual Report 2007. Manila, Philippines: National Epidemiology Center, Department of Health (Philippines). | X |   |   |   |   |

|             |          |                                                                                                                                                                                                                                  |   |   |  |  |  |
|-------------|----------|----------------------------------------------------------------------------------------------------------------------------------------------------------------------------------------------------------------------------------|---|---|--|--|--|
| Philippines | 05 - PHL | National Epidemiology Center, Department of Health (Philippines). Philippines Field Health Service Information System Annual Report 1993. Manila, Philippines: National Epidemiology Center, Department of Health (Philippines). | X |   |  |  |  |
| Philippines | 06 - PHL | National Epidemiology Center, Department of Health (Philippines). Philippines Field Health Service Information System Annual Report 1994. Manila, Philippines: National Epidemiology Center, Department of Health (Philippines). | X |   |  |  |  |
| Philippines | 07 - PHL | National Epidemiology Center, Department of Health (Philippines). Philippines Field Health Service Information System Annual Report 1996. Manila, Philippines: National Epidemiology Center, Department of Health (Philippines). | X |   |  |  |  |
| Philippines | 08 - PHL | National Epidemiology Center, Department of Health (Philippines). Philippines Field Health Service Information System Annual Report 1997. Manila, Philippines: National Epidemiology Center, Department of Health (Philippines). | X |   |  |  |  |
| Philippines | 09 - PHL | National Epidemiology Center, Department of Health (Philippines). Philippines Field Health Service Information System Annual Report 1998. Manila, Philippines: National Epidemiology Center, Department of Health (Philippines). | X |   |  |  |  |
| Philippines | 10 - PHL | National Epidemiology Center, Department of Health (Philippines). Philippines Field Health Service Information System Annual Report 2000. Manila, Philippines: National Epidemiology Center, Department of Health (Philippines). | X |   |  |  |  |
| Philippines | 11 - PHL | National Epidemiology Center, Department of Health (Philippines). Philippines Field Health Service Information System Annual Report 2001. Manila, Philippines: National Epidemiology Center, Department of Health (Philippines). | X |   |  |  |  |
| Philippines | 12 - PHL | National Epidemiology Center, Department of Health (Philippines). Philippines Field Health Service Information System Annual Report 2002. Manila, Philippines: National Epidemiology Center, Department of Health (Philippines). | X |   |  |  |  |
| Philippines | 13 - PHL | National Epidemiology Center, Department of Health (Philippines). Philippines Field Health Service Information System Annual Report 2003. Manila, Philippines: National Epidemiology Center, Department of Health (Philippines). | X |   |  |  |  |
| Philippines | 14 - PHL | World Health Organisation (WHO). WHO Mortality Database Version February 2014. Geneva, Switzerland: World Health Organisation (WHO), 2014.                                                                                       |   | X |  |  |  |
| Philippines | 15 - PHL | World Health Organisation (WHO). WHO Mortality Database Version July 2012. Geneva, Switzerland: World Health Organisation (WHO), 2012.                                                                                           |   | X |  |  |  |
| Poland      | 01 - POL | World Health Organisation (WHO). WHO Mortality Database Version February 2014. Geneva, Switzerland: World Health Organisation (WHO), 2014.                                                                                       |   | X |  |  |  |
| Poland      | 02 - POL | World Health Organisation (WHO). WHO Mortality Database Version July 2012. Geneva, Switzerland: World Health Organisation (WHO), 2012.                                                                                           |   | X |  |  |  |
| Portugal    | 01 - PRT | World Health Organisation (WHO). WHO Mortality Database Version February 2014. Geneva, Switzerland: World Health Organisation (WHO), 2014.                                                                                       |   | X |  |  |  |
| Portugal    | 02 - PRT | World Health Organisation (WHO). WHO Mortality Database Version July 2012. Geneva, Switzerland: World Health Organisation (WHO), 2012.                                                                                           |   | X |  |  |  |
| Puerto Rico | 01 - PRI | World Health Organisation (WHO). WHO Mortality Database Version February 2014. Geneva, Switzerland: World Health Organisation (WHO), 2014.                                                                                       |   | X |  |  |  |

|                                  |          |                                                                                                                                                                                                                                                                         |   |   |   |   |   |
|----------------------------------|----------|-------------------------------------------------------------------------------------------------------------------------------------------------------------------------------------------------------------------------------------------------------------------------|---|---|---|---|---|
| Puerto Rico                      | 02 - PRI | World Health Organisation (WHO). WHO Mortality Database Version July 2012. Geneva, Switzerland: World Health Organisation (WHO), 2012.                                                                                                                                  |   | X |   |   |   |
| Qatar                            | 01 - QAT | World Health Organisation (WHO). WHO Mortality Database Version February 2014. Geneva, Switzerland: World Health Organisation (WHO), 2014.                                                                                                                              |   | X |   |   |   |
| Romania                          | 01 - ROU | World Health Organisation (WHO). WHO Mortality Database Version February 2014. Geneva, Switzerland: World Health Organisation (WHO), 2014.                                                                                                                              |   | X |   |   |   |
| Romania                          | 02 - ROU | World Health Organisation (WHO). WHO Mortality Database Version July 2012. Geneva, Switzerland: World Health Organisation (WHO), 2012.                                                                                                                                  |   | X |   |   |   |
| Russia                           | 01 - RUS | Center for Demographic Research, New Economic School (Russia). Russia Mortality Rates by Region, Age, Sex, and Cause of Death 1989-1998. Moscow, Russia: Center for Demographic Research, New Economic School (Russia).                                                 |   | X |   |   |   |
| Russia                           | 02 - RUS | World Health Organisation (WHO). WHO Mortality Database Version February 2014. Geneva, Switzerland: World Health Organisation (WHO), 2014.                                                                                                                              |   | X |   |   |   |
| Rwanda                           | 01 - RWA | ICF Macro, Ministry of Health (Rwanda), National Institute of Statistics of Rwanda, National Office of Population (Rwanda). Rwanda Demographic and Health Survey 1992, 2000, 2005, 2007-2008, 2010-2011. ICF Macro.                                                     |   |   | X |   |   |
| Saint Lucia                      | 01 - LCA | World Health Organisation (WHO). WHO Mortality Database Version February 2014. Geneva, Switzerland: World Health Organisation (WHO), 2014.                                                                                                                              |   | X |   |   |   |
| Saint Lucia                      | 02 - LCA | World Health Organisation (WHO). WHO Mortality Database Version July 2012. Geneva, Switzerland: World Health Organisation (WHO), 2012.                                                                                                                                  |   | X |   |   |   |
| Saint Vincent and the Grenadines | 01 - VCT | World Health Organisation (WHO). WHO Mortality Database Version February 2014. Geneva, Switzerland: World Health Organisation (WHO), 2014.                                                                                                                              |   | X |   |   |   |
| Saint Vincent and the Grenadines | 02 - VCT | World Health Organisation (WHO). WHO Mortality Database Version July 2012. Geneva, Switzerland: World Health Organisation (WHO), 2012.                                                                                                                                  |   | X |   |   |   |
| Sao Tome and Principe            | 01 - STP | National Statistics Office (São Tomé and Príncipe), Ministry of Health (São Tomé and Príncipe), <span>ICF Macro. São Tomé and Príncipe Demographic and Health Survey 2008-2009. Calverton, United States: ICF Macro.                                                    |   |   | X |   |   |
| Sao Tome and Principe            | 02 - STP | World Health Organisation (WHO). WHO Mortality Database Version February 2014. Geneva, Switzerland: World Health Organisation (WHO), 2014.                                                                                                                              |   | X |   |   |   |
| Senegal                          | 01 - SEN | Directorate of Forecasting and Statistics (Senegal), Minnesota Population Center. Senegal General Population and Housing Census 2002 from the Integrated Public Use Microdata Series, International: [Machine-readable database]. Minneapolis: University of Minnesota. |   |   |   | X |   |
| Senegal                          | 02 - SEN | Duthe G, Pison G. Adult mortality in a rural area of Senegal: Non-communicable diseases have a large impact in Mlomp. Demographic Research. 2008; 19(37): 1419-48.                                                                                                      |   |   |   |   | X |
| Senegal                          | 03 - SEN | Helleringer S, Duthé G, Kanté AM, Andro A, Sokhna C, Trape J-F, Pison G. Misclassification of pregnancy-related deaths in adult mortality surveys: case study in Senegal. Trop Med Int Health. 2013; 18(1): 27-34.                                                      | X |   |   |   |   |
| Senegal                          | 04 - SEN | Macro International, Inc, National Agency of Statistics and Demography (Senegal). Senegal Demographic and Health Survey 1986, 1992-1993, 1997, 2005, 2010-2011.                                                                                                         |   |   | X |   |   |

|              |          |                                                                                                                                                                                                                                                   |  |   |   |   |   |
|--------------|----------|---------------------------------------------------------------------------------------------------------------------------------------------------------------------------------------------------------------------------------------------------|--|---|---|---|---|
| Serbia       | 01 - SRB | World Health Organisation (WHO). WHO Mortality Database Version February 2014. Geneva, Switzerland: World Health Organisation (WHO), 2014.                                                                                                        |  | X |   |   |   |
| Seychelles   | 01 - SYC | World Health Organisation (WHO). WHO Mortality Database Version February 2014. Geneva, Switzerland: World Health Organisation (WHO), 2014.                                                                                                        |  | X |   |   |   |
| Seychelles   | 02 - SYC | World Health Organisation (WHO). WHO Mortality Database Version July 2012. Geneva, Switzerland: World Health Organisation (WHO), 2012.                                                                                                            |  | X |   |   |   |
| Sierra Leone | 01 - SLE | Central Statistics Office (Sierra Leone). Sierra Leone Population and Housing Census 2004.                                                                                                                                                        |  |   |   | X |   |
| Sierra Leone | 02 - SLE | Groen RS, Solomon J, Samai MM, Kamara TB, Cassidy LDM, Blok L, Kushner AL, Dhanaraj M, Stekelenburg J. Female Health and Family Planning in Sierra Leone. Obstet Gynecol. 2013; 122(3): 525-31.                                                   |  |   |   | X |   |
| Sierra Leone | 03 - SLE | Statistics Sierra Leone and Minnesota Population Center. Sierra Leone Population and Housing Census 2004 from the Integrated Public Use Microdata Series, International: [Machine-readable database]. Minneapolis: University of Minnesota, 2011. |  |   |   | X |   |
| Sierra Leone | 04 - SLE | Statistics Sierra Leone, Macro International, Inc. Sierra Leone Demographic and Health Survey 2008. Calverton, United States: Macro International, Inc.                                                                                           |  |   | X |   |   |
| Singapore    | 01 - SGP | World Health Organisation (WHO). WHO Mortality Database Version February 2014. Geneva, Switzerland: World Health Organisation (WHO), 2014.                                                                                                        |  | X |   |   |   |
| Singapore    | 02 - SGP | World Health Organisation (WHO). WHO Mortality Database Version July 2012. Geneva, Switzerland: World Health Organisation (WHO), 2012.                                                                                                            |  | X |   |   |   |
| Slovakia     | 01 - SVK | World Health Organisation (WHO). WHO Mortality Database Version February 2014. Geneva, Switzerland: World Health Organisation (WHO), 2014.                                                                                                        |  | X |   |   |   |
| Slovakia     | 02 - SVK | World Health Organisation (WHO). WHO Mortality Database Version July 2012. Geneva, Switzerland: World Health Organisation (WHO), 2012.                                                                                                            |  | X |   |   |   |
| Slovenia     | 01 - SVN | World Health Organisation (WHO). WHO Mortality Database Version February 2014. Geneva, Switzerland: World Health Organisation (WHO), 2014.                                                                                                        |  | X |   |   |   |
| Slovenia     | 02 - SVN | World Health Organisation (WHO). WHO Mortality Database Version July 2012. Geneva, Switzerland: World Health Organisation (WHO), 2012.                                                                                                            |  | X |   |   |   |
| South Africa | 01 - ZAF | Department of Health (South Africa), South African Medical Research Council, Macro International, Inc. South Africa Demographic and Health Survey 1998. Calverton, United States: Macro International, Inc.                                       |  |   | X |   |   |
| South Africa | 02 - ZAF | MRC/Wits Rural Public Health and Health Transitions Research Unit (Agincourt), INDEPTH. South Africa - Agincourt Health and Socio-Demographic Surveillance System.                                                                                |  |   |   |   | X |
| South Africa | 03 - ZAF | Muhwava W. Contributions of the Africa Centre Demographic Surveillance to the Community. Umbiko. 2007; 12. 3-4.                                                                                                                                   |  |   |   |   | X |
| South Africa | 04 - ZAF | Statistics South Africa, Minnesota Population Center. South Africa Community Survey 2007 from the Integrated Public Use Microdata Series, International: [Machine-readable database]. Minneapolis: University of Minnesota.                       |  |   |   | X |   |
| South Africa | 05 - ZAF | Statistics South Africa. South Africa Population and Housing Census 2001.                                                                                                                                                                         |  |   |   | X |   |
| South Africa | 06 - ZAF | World Health Organisation (WHO). WHO Mortality Database Version February 2014. Geneva, Switzerland: World Health Organisation (WHO), 2014.                                                                                                        |  | X |   |   |   |

|             |          |                                                                                                                                                                                                                                                                                                                                                                        |   |   |  |   |  |
|-------------|----------|------------------------------------------------------------------------------------------------------------------------------------------------------------------------------------------------------------------------------------------------------------------------------------------------------------------------------------------------------------------------|---|---|--|---|--|
| South Korea | 01 - KOR | World Health Organisation (WHO). WHO Mortality Database Version February 2014. Geneva, Switzerland: World Health Organisation (WHO), 2014.                                                                                                                                                                                                                             |   | X |  |   |  |
| South Sudan | 01 - SSD | National Population Census Council (Sudan), Central Bureau of Statistics (Sudan), Southern Sudan Centre for Census, Statistics and Evaluation (SSCCSE), Minnesota Population Center. Sudan Population and Housing Census 2008 from the Integrated Public Use Microdata Series, International: [Machine-readable database]. Minneapolis: University of Minnesota, 2011. |   |   |  | X |  |
| Spain       | 01 - ESP | World Health Organisation (WHO). WHO Mortality Database Version February 2014. Geneva, Switzerland: World Health Organisation (WHO), 2014.                                                                                                                                                                                                                             |   | X |  |   |  |
| Spain       | 02 - ESP | World Health Organisation (WHO). WHO Mortality Database Version July 2012. Geneva, Switzerland: World Health Organisation (WHO), 2012.                                                                                                                                                                                                                                 |   | X |  |   |  |
| Sri Lanka   | 01 - LKA | Ministry of Health (Sri Lanka). Sri Lanka Achievements in Maternal Health.                                                                                                                                                                                                                                                                                             | X |   |  |   |  |
| Sri Lanka   | 02 - LKA | Registrar General's Department (Sri Lanka). Sri Lanka Vital Statistics - Deaths 1979.                                                                                                                                                                                                                                                                                  |   | X |  |   |  |
| Sri Lanka   | 03 - LKA | Registrar General's Department (Sri Lanka). Sri Lanka Vital Statistics - Deaths 1993-1996.                                                                                                                                                                                                                                                                             |   | X |  |   |  |
| Sri Lanka   | 04 - LKA | World Health Organisation (WHO). WHO Mortality Database Version February 2014. Geneva, Switzerland: World Health Organisation (WHO), 2014.                                                                                                                                                                                                                             |   | X |  |   |  |
| Sri Lanka   | 05 - LKA | World Health Organisation (WHO). WHO Mortality Database Version July 2012. Geneva, Switzerland: World Health Organisation (WHO), 2012.                                                                                                                                                                                                                                 |   | X |  |   |  |
| Sudan       | 01 - SDN | Ministry of Finance and Economic Planning, Department of Statistics, Macro Systems, Inc.; Institute for Resource Development. Sudan Demographic and Health Survey 1989-1990. Columbia, United States: Macro Systems, Inc.                                                                                                                                              |   |   |  | X |  |
| Sudan       | 02 - SDN | Ministry of Health (Southern Sudan), Federal Ministry of Health (Sudan), Southern Sudan Centre for Census, Statistics and Evaluation (SSCCSE), Central Bureau of Statistics (Sudan). Sudan Family Health Survey 2006.                                                                                                                                                  | X |   |  |   |  |
| Sudan       | 03 - SDN | National Population Census Council (Sudan), Central Bureau of Statistics (Sudan), Southern Sudan Centre for Census, Statistics and Evaluation (SSCCSE), Minnesota Population Center. Sudan Population and Housing Census 2008 from the Integrated Public Use Microdata Series, International: [Machine-readable database]. Minneapolis: University of Minnesota, 2011. |   |   |  | X |  |
| Sudan       | 04 - SDN | Southern Sudan Centre for Census, Statistics and Evaluation (SSCCSE) and National Population Census Council. Sudan Population and Housing Census 2008.                                                                                                                                                                                                                 |   |   |  | X |  |
| Suriname    | 01 - SUR | World Health Organisation (WHO). WHO Mortality Database Version February 2014. Geneva, Switzerland: World Health Organisation (WHO), 2014.                                                                                                                                                                                                                             |   | X |  |   |  |
| Suriname    | 02 - SUR | World Health Organisation (WHO). WHO Mortality Database Version July 2012. Geneva, Switzerland: World Health Organisation (WHO), 2012.                                                                                                                                                                                                                                 |   | X |  |   |  |
| Swaziland   | 01 - SWZ | Central Statistical Office (Swaziland), Macro International, Inc. Swaziland Demographic and Health Survey 2006-2007. Calverton, United States: Macro International, Inc.                                                                                                                                                                                               |   |   |  | X |  |
| Sweden      | 01 - SWE | World Health Organisation (WHO). WHO Mortality Database Version February 2014. Geneva, Switzerland: World Health Organisation (WHO), 2014.                                                                                                                                                                                                                             |   | X |  |   |  |

|                            |          |                                                                                                                                                                                                                                                       |   |   |   |  |   |
|----------------------------|----------|-------------------------------------------------------------------------------------------------------------------------------------------------------------------------------------------------------------------------------------------------------|---|---|---|--|---|
| Sweden                     | 02 - SWE | World Health Organisation (WHO). WHO Mortality Database Version July 2012. Geneva, Switzerland: World Health Organisation (WHO), 2012.                                                                                                                |   | X |   |  |   |
| Switzerland                | 01 - CHE | World Health Organisation (WHO). WHO Mortality Database Version July 2012. Geneva, Switzerland: World Health Organisation (WHO), 2012.                                                                                                                |   | X |   |  |   |
| Syria                      | 01 - SYR | Bashour H, Abdulsalam A, Jabr A, Cheikha S, Tabbaa M, Lahham M, Dihman R, Khadra M, Campbell OMR. Maternal mortality in Syria: causes, contributing factors and preventability. Trop Med Int Health. 2009; 14(9): 1122-7.                             |   |   |   |  | X |
| Syria                      | 02 - SYR | Central Bureau of Statistics (Syria), League of Arab States. Syria Family Health Survey 2001.                                                                                                                                                         | X |   |   |  |   |
| Syria                      | 03 - SYR | World Health Organisation (WHO). WHO Mortality Database Version February 2014. Geneva, Switzerland: World Health Organisation (WHO), 2014.                                                                                                            |   | X |   |  |   |
| Syria                      | 04 - SYR | World Health Organisation (WHO). WHO Mortality Database Version July 2012. Geneva, Switzerland: World Health Organisation (WHO), 2012.                                                                                                                |   | X |   |  |   |
| Taiwan (Province of China) | 01 - TWN | Department of Health (Taiwan). Taiwan Statistics of Causes of Death 2008.                                                                                                                                                                             |   | X |   |  |   |
| Taiwan (Province of China) | 02 - TWN | Department of Health (Taiwan). Taiwan Statistics of Causes of Death 2009.                                                                                                                                                                             |   | X |   |  |   |
| Taiwan (Province of China) | 03 - TWN | Department of Health (Taiwan). Taiwan Statistics of Causes of Death 2010.                                                                                                                                                                             |   | X |   |  |   |
| Taiwan (Province of China) | 04 - TWN | Department of Health (Taiwan). Taiwan Statistics of Causes of Death 2011.                                                                                                                                                                             |   | X |   |  |   |
| Taiwan (Province of China) | 05 - TWN | Department of Health (Taiwan). Taiwan Statistics of Causes of Death 2012.                                                                                                                                                                             |   | X |   |  |   |
| Taiwan (Province of China) | 06 - TWN | Department of Health (Taiwan). Taiwan Vital Statistics - Deaths 2007.                                                                                                                                                                                 |   | X |   |  |   |
| Tajikistan                 | 01 - TJK | United Nations Children's Fund (UNICEF). Tajikistan Infant Mortality Report 2001-2003.                                                                                                                                                                |   |   |   |  | X |
| Tajikistan                 | 02 - TJK | World Health Organisation (WHO). WHO Mortality Database Version February 2014. Geneva, Switzerland: World Health Organisation (WHO), 2014.                                                                                                            |   | X |   |  |   |
| Tanzania                   | 01 - TZA | Ae-Ngibise KA, Masanja H, Kellerman R, Owusu-Agyei S. Risk factors for injury mortality in rural Tanzania: a secondary data analysis. BMJ Open. 2012; 2(6): e001721.                                                                                  |   |   |   |  | X |
| Tanzania                   | 02 - TZA | ICF Macro, National Bureau of Statistics (Tanzania), Planning Commission (Tanzania). Tanzania Demographic and Health Survey 1991-1992, 1996, 1999, 2004-2005, 2009-2010. ICF Macro.                                                                   |   |   | X |  |   |
| Tanzania                   | 03 - TZA | INDEPTH, National Institute for Medical Research (Tanzania), London School of Hygiene and Tropical Medicine. Tanzania - Magu Health and Demographic Surveillance System. Dar es Salaam, Tanzania: National Institute for Medical Research (Tanzania). |   |   |   |  | X |
| Tanzania                   | 04 - TZA | INDEPTH. Tanzania - Ifakara Health and Demographic Surveillance System.                                                                                                                                                                               |   |   |   |  | X |
| Tanzania                   | 05 - TZA | INDEPTH. Tanzania - Rufiji Health and Demographic Surveillance System.                                                                                                                                                                                |   |   |   |  | X |

|                     |          |                                                                                                                                                                                                                                                                     |   |   |   |  |   |
|---------------------|----------|---------------------------------------------------------------------------------------------------------------------------------------------------------------------------------------------------------------------------------------------------------------------|---|---|---|--|---|
| Tanzania            | 06 - TZA | Illah E, Mbaruku G, Masanja H, Kahn K. Causes and risk factors for maternal mortality in rural Tanzania--case of Rufiji Health and Demographic Surveillance Site (HDSS). <i>Afr J Reprod Health</i> . 2013; 17(3): 119-30.                                          | X |   |   |  |   |
| Tanzania            | 07 - TZA | Kaatano GM, Mashauri FM, Kinung'hi SM, Mwanga JR, Malima RC, Kishamawe C, Nnko SE, Magesa SM, Mboera LE. Patterns of malaria related mortality based on verbal autopsy in Muleba District, north-western Tanzania. <i>Tanzan J Health Res</i> . 2009; 11(4): 210-8. |   |   |   |  | X |
| Tanzania            | 08 - TZA | Kamara MK. Clustering of mortality among children under five years due to malaria at the Ifakara Demographic Surveillance Site in Tanzania [Dissertation]. [Johannesburg]: <span dir="ltr">University of the Witwatersrand; 2008.                                   |   |   |   |  | X |
| Tanzania            | 09 - TZA | MacLeod J, Rhode R. Retrospective follow-up of maternal deaths and their associated risk factors in a rural district of Tanzania. <i>Trop Med Int Health</i> . 1998; 3(2): 130-7.                                                                                   |   |   |   |  | X |
| Tanzania            | 10 - TZA | Ministry of Health and Social Welfare (Tanzania), Newcastle University, UK Department for International Development (DFID). Tanzania Policy Implications of Mortality Burden 1995-2001.                                                                             |   |   |   |  | X |
| Tanzania            | 11 - TZA | Mtango FD, Neuvians D, Broome CV, Hightower AW, Pio A. Risk factors for deaths in children under 5 years old in Bagamoyo district, Tanzania. <i>Trop Med Parasitol</i> . 1992; 43(4): 229-33.                                                                       |   |   |   |  | X |
| Tanzania            | 12 - TZA | Narah-Bana, S. Risk Factors and Causes of Adult Deaths in the Ifakara Health and Demographic Surveillance System Population, 2003-2007 [dissertation]. [Johannesburg, South Africa]: University of the Witwatersrand; 2010. 174 p.                                  |   |   |   |  | X |
| Tanzania            | 13 - TZA | Sangber-Dery MD. The Role of Birth Order in Infant Mortality in Ifakara DSS Area in Rural Tanzania [master's thesis]. [Johannesburg, South Africa]: University of the Witwatersrand; 2009.                                                                          |   |   |   |  | X |
| Thailand            | 01 - THA | Ministry of Public Health (Thailand). Thailand Burden of Disease and Injuries 1998-1999.                                                                                                                                                                            |   |   |   |  | X |
| Thailand            | 02 - THA | World Health Organisation (WHO). WHO Mortality Database Version February 2014. Geneva, Switzerland: World Health Organisation (WHO), 2014.                                                                                                                          |   | X |   |  |   |
| Thailand            | 03 - THA | World Health Organisation (WHO). WHO Mortality Database Version July 2012. Geneva, Switzerland: World Health Organisation (WHO), 2012.                                                                                                                              |   | X |   |  |   |
| The Bahamas         | 01 - BHS | World Health Organisation (WHO). WHO Mortality Database Version February 2014. Geneva, Switzerland: World Health Organisation (WHO), 2014.                                                                                                                          |   | X |   |  |   |
| The Bahamas         | 02 - BHS | World Health Organisation (WHO). WHO Mortality Database Version July 2012. Geneva, Switzerland: World Health Organisation (WHO), 2012.                                                                                                                              |   | X |   |  |   |
| The Gambia          | 01 - GMB | Walraven G, Telfer M, Rowley J, Ronsmans C. Maternal mortality in rural Gambia: levels, causes and contributing factors. <i>Bull World Health Organ</i> . 2000; 78(5): 603-13.                                                                                      |   |   |   |  | X |
| Timor-Leste         | 01 - TLS | National Statistics Directorate (Timor-Leste), Ministry of Finance (Timor-Leste), ICF Macro. Timor-Leste Demographic and Health Survey 2009-2010. Calverton, United States: ICF Macro.                                                                              |   |   | X |  |   |
| Togo                | 01 - TGO | Demographic Research Unit (Togo), Department of Statistics (Togo), Macro International, Inc, Ministry of Public Health, Social Affairs and the Status of Women (Togo). Togo Demographic and Health Survey 1988, 1998.                                               |   |   | X |  |   |
| Trinidad and Tobago | 01 - TTO | World Health Organisation (WHO). WHO Mortality Database Version February 2014. Geneva, Switzerland: World Health Organisation (WHO), 2014.                                                                                                                          |   | X |   |  |   |



|                     |          |                                                                                                                                                                                                                            |  |   |   |  |   |
|---------------------|----------|----------------------------------------------------------------------------------------------------------------------------------------------------------------------------------------------------------------------------|--|---|---|--|---|
| Trinidad and Tobago | 02 - TTO | World Health Organisation (WHO). WHO Mortality Database Version July 2012. Geneva, Switzerland: World Health Organisation (WHO), 2012.                                                                                     |  | X |   |  |   |
| Turkey              | 01 - TUR | Baskent University, Ministry of Health (Turkey), State Institute of Statistics (Turkey). Turkey Verbal Autopsy Survey 2003.                                                                                                |  |   |   |  | X |
| Turkey              | 02 - TUR | Turkish Statistical Institute. Turkey Causes of Death Statistics 2010-2012. Ankara, Turkey: Turkish Statistical Institute.                                                                                                 |  | X |   |  |   |
| Turkey              | 03 - TUR | Türkyılmaz AS, Koc I, Schumacher R, Campbell OMR. The Turkey national maternal mortality study. Eur J Contracept Reprod Health Care. 2009; 14(1): 75-82.                                                                   |  |   |   |  | X |
| Turkey              | 04 - TUR | World Health Organisation (WHO). WHO Mortality Database Version July 2012. Geneva, Switzerland: World Health Organisation (WHO), 2012.                                                                                     |  | X |   |  |   |
| Turkmenistan        | 01 - TKM | World Health Organisation (WHO). WHO Mortality Database Version February 2014. Geneva, Switzerland: World Health Organisation (WHO), 2014.                                                                                 |  | X |   |  |   |
| Uganda              | 01 - UGA | Macro International, Inc, Ministry of Health (Uganda), Uganda Bureau of Statistics. Uganda Demographic and Health Survey 1988-1989, 1995, 2000-2001, 2006.                                                                 |  |   | X |  |   |
| Ukraine             | 01 - UKR | World Health Organisation (WHO). WHO Mortality Database Version February 2014. Geneva, Switzerland: World Health Organisation (WHO), 2014.                                                                                 |  | X |   |  |   |
| Ukraine             | 02 - UKR | World Health Organisation (WHO). WHO Mortality Database Version July 2012. Geneva, Switzerland: World Health Organisation (WHO), 2012.                                                                                     |  | X |   |  |   |
| United Kingdom      | 01 - GBR | National Records of Scotland. United Kingdom - Scotland Vital Events Reference Tables 2011. Edinburgh, Scotland: National Records of Scotland.                                                                             |  | X |   |  |   |
| United Kingdom      | 02 - GBR | National Records of Scotland. United Kingdom - Scotland Vital Events Reference Tables 2012. Edinburgh, Scotland: National Records of Scotland.                                                                             |  | X |   |  |   |
| United Kingdom      | 03 - GBR | Northern Ireland Statistics and Research Agency (NISRA). United Kingdom - Northern Ireland Registrar General Annual Report 2011. Belfast, Northern Ireland: Northern Ireland Statistics and Research Agency (NISRA), 2012. |  | X |   |  |   |
| United Kingdom      | 04 - GBR | Office for National Statistics (United Kingdom). United Kingdom - England and Wales Mortality Data 1981-1994. Newport, United Kingdom: Office for National Statistics (United Kingdom).                                    |  | X |   |  |   |
| United Kingdom      | 05 - GBR | Office for National Statistics (United Kingdom). United Kingdom - England and Wales Mortality Data 1995-2000. Newport, United Kingdom: Office for National Statistics (United Kingdom).                                    |  | X |   |  |   |
| United Kingdom      | 06 - GBR | Office for National Statistics (United Kingdom). United Kingdom - England and Wales Mortality Data 2001-2012. Newport, United Kingdom: Office for National Statistics (United Kingdom).                                    |  | X |   |  |   |
| United Kingdom      | 07 - GBR | World Health Organisation (WHO). WHO Mortality Database Version February 2014. Geneva, Switzerland: World Health Organisation (WHO), 2014.                                                                                 |  | X |   |  |   |
| United Kingdom      | 08 - GBR | World Health Organisation (WHO). WHO Mortality Database Version July 2012. Geneva, Switzerland: World Health Organisation (WHO), 2012.                                                                                     |  | X |   |  |   |
| United States       | 01 - USA | World Health Organisation (WHO). WHO Mortality Database Version February 2014. Geneva, Switzerland: World Health Organisation (WHO), 2014.                                                                                 |  | X |   |  |   |
| United States       | 02 - USA | World Health Organisation (WHO). WHO Mortality Database Version July 2012. Geneva, Switzerland: World Health Organisation (WHO), 2012.                                                                                     |  | X |   |  |   |

|              |          |                                                                                                                                                                                                                                                                                                                                                                                                   |   |   |  |   |   |
|--------------|----------|---------------------------------------------------------------------------------------------------------------------------------------------------------------------------------------------------------------------------------------------------------------------------------------------------------------------------------------------------------------------------------------------------|---|---|--|---|---|
| Uruguay      | 01 - URY | World Health Organisation (WHO). WHO Mortality Database Version February 2014. Geneva, Switzerland: World Health Organisation (WHO), 2014.                                                                                                                                                                                                                                                        |   | X |  |   |   |
| Uruguay      | 02 - URY | World Health Organisation (WHO). WHO Mortality Database Version July 2012. Geneva, Switzerland: World Health Organisation (WHO), 2012.                                                                                                                                                                                                                                                            |   | X |  |   |   |
| Uzbekistan   | 01 - UZB | World Health Organisation (WHO). WHO Mortality Database Version February 2014. Geneva, Switzerland: World Health Organisation (WHO), 2014.                                                                                                                                                                                                                                                        |   | X |  |   |   |
| Venezuela    | 01 - VEN | World Health Organisation (WHO). WHO Mortality Database Version February 2014. Geneva, Switzerland: World Health Organisation (WHO), 2014.                                                                                                                                                                                                                                                        |   | X |  |   |   |
| Venezuela    | 02 - VEN | World Health Organisation (WHO). WHO Mortality Database Version July 2012. Geneva, Switzerland: World Health Organisation (WHO), 2012.                                                                                                                                                                                                                                                            |   | X |  |   |   |
| Vietnam      | 01 - VNM | Hanoi School of Public Health, Ministry of Health (Viet Nam), School of Population Health, University of Queensland (Australia). Vietnam Burden of Disease and Injury Study 2008. Hanoi, Vietnam: Hanoi School of Public Health, 2011.                                                                                                                                                            |   |   |  |   | X |
| Vietnam      | 02 - VNM | Hieu DT, Hanenberg R, Vach TH, Vinh DQ, Sokal D. Maternal mortality in Vietnam in 1994-95. Stud Fam Plann. 1999; 30(4): 329-38.                                                                                                                                                                                                                                                                   |   |   |  |   | X |
| Western Cape | 01 - ZWC | Department of Home Affairs (South Africa), Statistics South Africa. South Africa Mortality and Causes of Death 1997-2005. Pretoria, South Africa: Statistics South Africa.                                                                                                                                                                                                                        |   | X |  |   |   |
| Yemen        | 01 - YEM | Central Statistical Organisation (Yemen), Macro International, Inc. Yemen Demographic and Health Survey 1997. Calverton, United States: Macro International, Inc.                                                                                                                                                                                                                                 |   |   |  | X |   |
| Yemen        | 02 - YEM | Ministry of Health and Population (Yemen), Central Statistical Organisation (Yemen). Yemen Family Health Survey 2003.                                                                                                                                                                                                                                                                             | X |   |  |   |   |
| Zambia       | 01 - ZMB | Central Board of Health (Zambia), Central Statistical Office (Zambia), Macro International, Inc, Ministry of Health (Zambia), University of Zambia. Zambia Demographic and Health Survey 1992, 1996-1997, 2001-2002, 2007.                                                                                                                                                                        |   |   |  | X |   |
| Zambia       | 02 - ZMB | Central Statistical Office (Zambia). Zambia Census of Population and Housing 2010.                                                                                                                                                                                                                                                                                                                |   |   |  |   | X |
| Zambia       | 03 - ZMB | Mudenda SS, Kamocha S, Mswia R, Conkling M, Sikanyiti P, Potter D, Mayaka WC, Marx MA. Feasibility of using a WHO-standard methodology for Sample Vital Registration with Verbal Autopsy (SAVVY) to report leading causes of death in Zambia: results of a pilot in four provinces, 2010. Popul Health Metr. 2011; 9: 40.                                                                         |   |   |  |   | X |
| Zimbabwe     | 01 - ZWE | Australian Agency for International Development (AusAID), Danish International Development Agency (DANIDA), European Union (EU), Swedish International Development Agency (SIDA), United Nations Children's Fund (UNICEF), United Nations Development Programme (UNDP), United Nations Population Fund (UNFPA), Zimbabwe National Statistics Agency. Zimbabwe Population and Housing Census 2012. |   |   |  |   | X |
| Zimbabwe     | 02 - ZWE | Central Statistical Office (Zimbabwe). Zimbabwe Population and Housing Census 1992.                                                                                                                                                                                                                                                                                                               |   |   |  |   | X |
| Zimbabwe     | 03 - ZWE | Central Statistical Office (Zimbabwe). Zimbabwe Population and Housing Census 2002.                                                                                                                                                                                                                                                                                                               |   |   |  |   | X |
| Zimbabwe     | 04 - ZWE | ICF Macro, Zimbabwe National Statistics Agency. Zimbabwe Demographic and Health Survey 1988-1989, 1994, 1999, 2005-2006, 2010-2011. ICF Macro.                                                                                                                                                                                                                                                    |   |   |  | X |   |
| Zimbabwe     | 05 - ZWE | Registrar General's Department (Zimbabwe), Zimbabwe National Statistics Agency. Zimbabwe Mortality Report 2007.                                                                                                                                                                                                                                                                                   |   | X |  |   |   |

|          |             |                                                                                                                                                  |  |   |  |  |  |  |
|----------|-------------|--------------------------------------------------------------------------------------------------------------------------------------------------|--|---|--|--|--|--|
| Zimbabwe | 06 -<br>ZWE | World Health Organisation (WHO). WHO Mortality Database<br>Version February 2014. Geneva, Switzerland: World Health<br>Organisation (WHO), 2014. |  | X |  |  |  |  |
|----------|-------------|--------------------------------------------------------------------------------------------------------------------------------------------------|--|---|--|--|--|--|

Appendix Figure 1: Flow chart of literature reviews for maternal mortality, causes of maternal mortality, and timing of maternal deaths

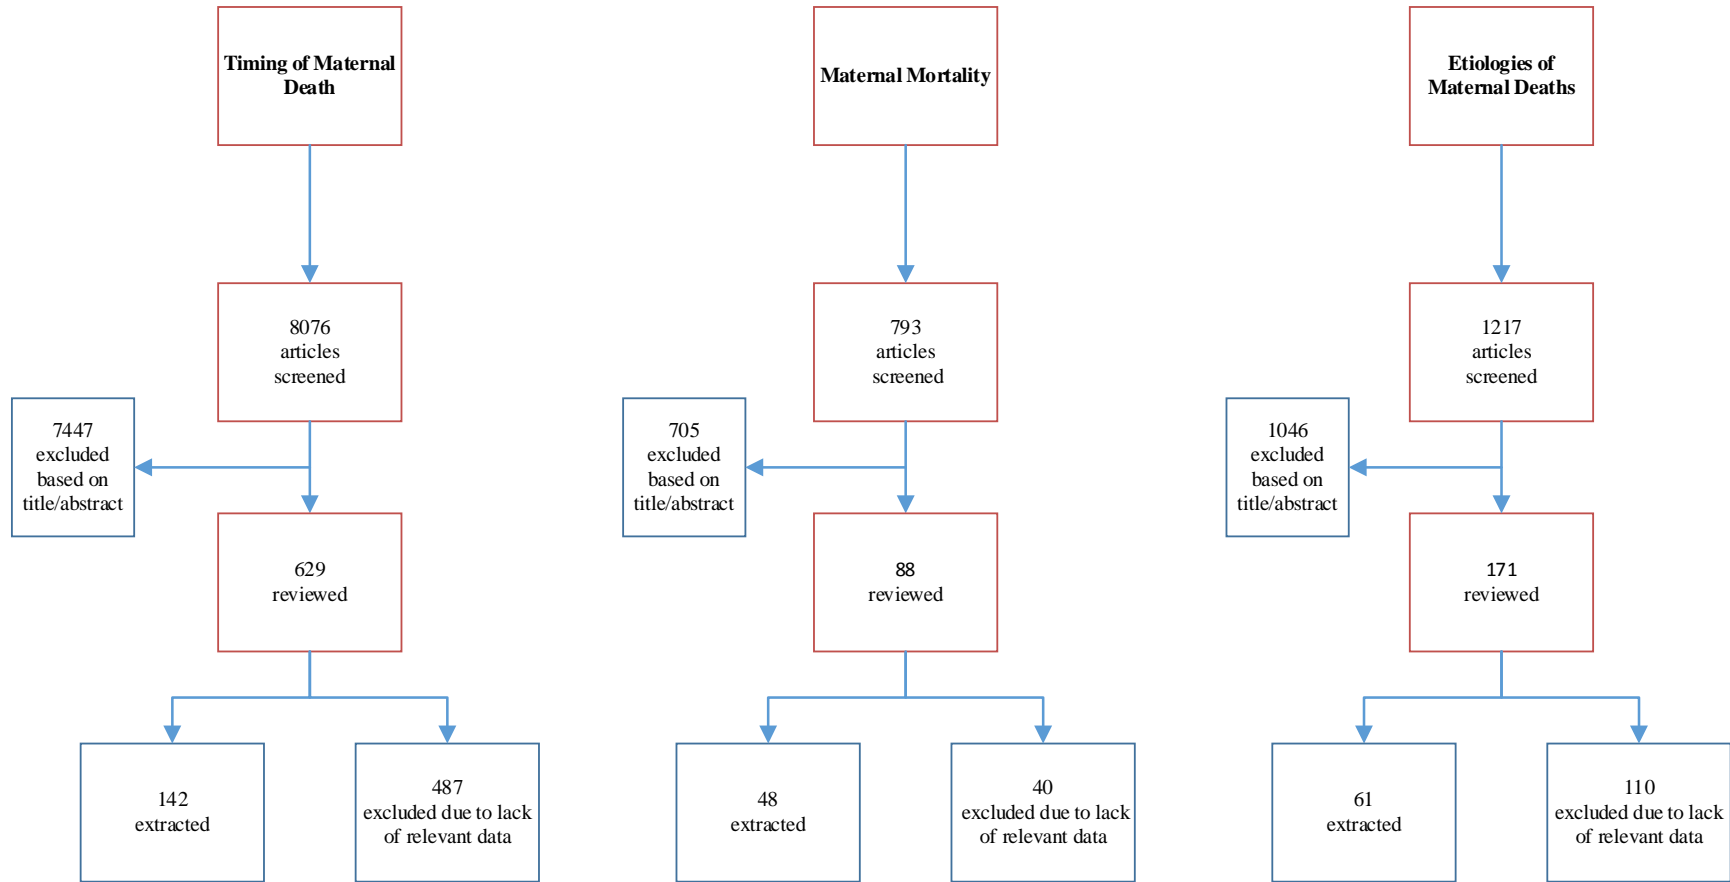

Appendix Table 2: ICD mapping of maternal causes of death

| Appendix Table 2: ICD10, ICD9 detail, and ICD9 BTL codes mapped to maternal causes |                                                                                                                                                                                                                                                                                                                                                                                                                                                                                                                                                                                                                                                                                                                                                                                                                                                                            |                                                                                                                                                                                                                                                                                                                                                                                                                                                                                                                                                                  |              |
|------------------------------------------------------------------------------------|----------------------------------------------------------------------------------------------------------------------------------------------------------------------------------------------------------------------------------------------------------------------------------------------------------------------------------------------------------------------------------------------------------------------------------------------------------------------------------------------------------------------------------------------------------------------------------------------------------------------------------------------------------------------------------------------------------------------------------------------------------------------------------------------------------------------------------------------------------------------------|------------------------------------------------------------------------------------------------------------------------------------------------------------------------------------------------------------------------------------------------------------------------------------------------------------------------------------------------------------------------------------------------------------------------------------------------------------------------------------------------------------------------------------------------------------------|--------------|
| Cause                                                                              | ICD10                                                                                                                                                                                                                                                                                                                                                                                                                                                                                                                                                                                                                                                                                                                                                                                                                                                                      | ICD9 detail                                                                                                                                                                                                                                                                                                                                                                                                                                                                                                                                                      | ICD9 BTL     |
| Maternal disorders                                                                 |                                                                                                                                                                                                                                                                                                                                                                                                                                                                                                                                                                                                                                                                                                                                                                                                                                                                            | V30, V300, V300.0, V300.1, V301, V302, V31, V310, V310.0, V310.1, V311, V312, V32, V320, V320.0, V320.1, V321, V322, V33, V330, V330.0, V330.1, V331, V332, V34, V340, V340.0, V340.1, V341, V34, V35, V350, V350.0, V350.1, V351, V352, V36, V360, V360.0, V360.1, V361, V362, V37, V370, V370.0, V370.1, V371, V372, V39, V390, V390.0, V390.1, V391, V392                                                                                                                                                                                                     | B39.2, B39.9 |
| Maternal haemorrhage                                                               | O20, O20.0, O20.8, O20.9, O43.2, O43.21, O43.211, O43.212, O43.213, O43.219, O43.22, O43.221, O43.222, O43.223, O43.229, O43.23, O43.231, O43.232, O43.233, O43.239, O44, O44.0, O44.00, O44.01, O44.02, O44.03, O44.1, O44.10, O44.11, O44.12, O44.13, O45, O45.0, O45.00, O45.001, O45.002, O45.003, O45.009, O45.01, O45.011, O45.012, O45.013, O45.019, O45.02, O45.021, O45.022, O45.023, O45.029, O45.09, O45.091, O45.092, O45.093, O45.099, O45.8, O45.9, O45.90, O45.91, O45.92, O45.93, O46, O46.0, O46.00, O46.001, O46.002, O46.003, O46.009, O46.01, O46.011, O46.012, O46.013, O46.019, O46.02, O46.021, O46.022, O46.023, O46.029, O46.09, O46.091, O46.092, O46.093, O46.099, O46.8, O46.9, O46.90, O46.91, O46.92, O46.93, O67, O67.0, O67.8, O67.9, O70, O71, O71.0, O71.00, O71.02, O71.03, O71.1, O71.2, O71.3, O71.4, O72, O72.0, O72.1, O72.2, O72.3 | 640, 640.0, 640.00, 640.01, 640.03, 640.8, 640.80, 640.81, 640.83, 640.9, 640.90, 640.91, 640.93, 641, 641.0, 641.00, 641.01, 641.03, 641.1, 641.10, 641.11, 641.13, 641.2, 641.20, 641.21, 641.23, 641.3, 641.30, 641.31, 641.33, 641.8, 641.80, 641.81, 641.83, 641.9, 641.90, 641.91, 641.93, 665, 665.0, 665.00, 665.01, 665.03, 665.1, 665.10, 665.11, 665.2, 665.20, 665.22, 665.24, 665.3, 665.30, 665.31, 665.34, 666, 666.0, 666.00, 666.02, 666.04, 666.1, 666.10, 666.12, 666.14, 666.2, 666.20, 666.22, 666.24, 666.3, 666.30, 666.32, 666.34, 666.9 | B39.0        |
| Maternal sepsis and other pregnancy related infection                              | O23, O23.0, O23.00, O23.01, O23.02, O23.03, O23.1, O23.10, O23.11, O23.12, O23.13, O23.2, O23.20, O23.21, O23.22, O23.23, O23.3, O23.30, O23.31, O23.32, O23.33, O23.4, O23.40, O23.41, O23.42, O23.43, O23.5, O23.51, O23.511, O23.512, O23.513, O23.519, O23.52, O23.521, O23.522, O23.523, O23.529, O23.59, O23.591, O23.592, O23.593, O23.599, O23.9, O23.90, O23.91, O23.92, O23.93, O85, O85.0, O86, O86.0, O86.1, O86.11, O86.12, O86.13, O86.19, O86.2, O86.20, O86.21, O86.22, O86.29, O86.3, O86.4, O86.8, O86.81, O86.89, O91, O91.0, O91.01, O91.011, O91.012, O91.013, O91.019, O91.02, O91.03, O91.1, O91.11, O91.111, O91.112, O91.113, O91.119, O91.12, O91.13, O91.2, O91.21, O91.211, O91.212, O91.213, O91.219, O91.22, O91.23                                                                                                                          | 659.3, 659.30, 659.31, 659.33, 670, 670.0, 670.00, 670.02, 670.04, 670.1, 670.10, 670.12, 670.14, 670.2, 670.20, 670.22, 670.24, 670.3, 670.30, 670.32, 670.34, 670.8, 670.80, 670.82, 670.84, 670.9                                                                                                                                                                                                                                                                                                                                                             | B39.4        |

|                                     |                                                                                                                                                                                                                                                                                                                                                                                                                                                                                                                                                                                                                                                                                                                                                                                                                                                      |                                                                                                                                                                                                                                                                                                                                                                                                                                                                                                                                                                                                                                                                                                                                                                                                                                                                                                                                                                                                                                                                                                                                                                                                                                                                                                                                                                                                                                                                 |                            |
|-------------------------------------|------------------------------------------------------------------------------------------------------------------------------------------------------------------------------------------------------------------------------------------------------------------------------------------------------------------------------------------------------------------------------------------------------------------------------------------------------------------------------------------------------------------------------------------------------------------------------------------------------------------------------------------------------------------------------------------------------------------------------------------------------------------------------------------------------------------------------------------------------|-----------------------------------------------------------------------------------------------------------------------------------------------------------------------------------------------------------------------------------------------------------------------------------------------------------------------------------------------------------------------------------------------------------------------------------------------------------------------------------------------------------------------------------------------------------------------------------------------------------------------------------------------------------------------------------------------------------------------------------------------------------------------------------------------------------------------------------------------------------------------------------------------------------------------------------------------------------------------------------------------------------------------------------------------------------------------------------------------------------------------------------------------------------------------------------------------------------------------------------------------------------------------------------------------------------------------------------------------------------------------------------------------------------------------------------------------------------------|----------------------------|
| Hypertensive disorders of pregnancy | <p>O10, O10.0, O10.01, O10.011, O10.012, O10.013, O10.019, O10.02, O10.03, O10.1, O10.11, O10.111, O10.112, O10.113, O10.119, O10.12, O10.13, O10.2, O10.21, O10.211, O10.212, O10.213, O10.219, O10.22, O10.23, O10.3, O10.31, O10.311, O10.312, O10.313, O10.319, O10.32, O10.33, O10.4, O10.41, O10.411, O10.412, O10.413, O10.419, O10.42, O10.43, O10.9, O10.91, O10.911, O10.912, O10.913, O10.919, O10.92, O10.93, O11, O11.1, O11.2, O11.3, O11.9, O12, O12.0, O12.00, O12.01, O12.02, O12.03, O12.1, O12.10, O12.11, O12.12, O12.13, O12.2, O12.20, O12.21, O12.22, O12.23, O13, O13.1, O13.2, O13.3, O13.9, O14, O14.0, O14.00, O14.02, O14.03, O14.1, O14.10, O14.12, O14.13, O14.2, O14.20, O14.22, O14.23, O14.9, O14.90, O14.92, O14.93, O15, O15.0, O15.00, O15.02, O15.03, O15.1, O15.2, O15.9, O16, O16.1, O16.2, O16.3, O16.9</p>  | <p>642, 642.0, 642.00, 642.01, 642.02, 642.03, 642.04, 642.1, 642.10, 642.11, 642.12, 642.13, 642.14, 642.2, 642.20, 642.21, 642.22, 642.23, 642.24, 642.3, 642.30, 642.31, 642.32, 642.33, 642.34, 642.4, 642.40, 642.41, 642.42, 642.43, 642.44, 642.5, 642.50, 642.51, 642.52, 642.53, 642.54, 642.6, 642.60, 642.61, 642.62, 642.63, 642.64, 642.7, 642.70, 642.71, 642.72, 642.73, 642.74, 642.9, 642.90, 642.91, 642.92, 642.93, 642.94</p>                                                                                                                                                                                                                                                                                                                                                                                                                                                                                                                                                                                                                                                                                                                                                                                                                                                                                                                                                                                                               | B39.1                      |
| Obstructed labor                    | <p>O64, O64.0, O64.1, O64.2, O64.3, O64.4, O64.5, O64.8, O64.9, O65, O65.0, O65.1, O65.2, O65.3, O65.4, O65.5, O65.8, O65.9, O66, O66.0, O66.1, O66.2, O66.3, O66.4, O66.40, O66.41, O66.5, O66.6, O66.8, O66.9, O71.5, O71.6, O71.7, O71.8, O71.81, O71.82, O71.89, O71.9</p>                                                                                                                                                                                                                                                                                                                                                                                                                                                                                                                                                                       | <p>660, 660.0, 660.00, 660.01, 660.03, 660.1, 660.10, 660.11, 660.13, 660.2, 660.20, 660.21, 660.23, 660.3, 660.30, 660.31, 660.33, 660.4, 660.40, 660.41, 660.43, 660.5, 660.50, 660.51, 660.53, 660.6, 660.60, 660.61, 660.63, 660.7, 660.70, 660.71, 660.73, 660.8, 660.80, 660.81, 660.83, 660.9, 660.90, 660.91, 660.93</p>                                                                                                                                                                                                                                                                                                                                                                                                                                                                                                                                                                                                                                                                                                                                                                                                                                                                                                                                                                                                                                                                                                                                | B39.3                      |
| Pregnancy with abortive outcome     | <p>N96, O00, O00.0, O00.1, O00.2, O00.8, O00.9, O01, O01.0, O01.1, O01.9, O02, O02.0, O02.1, O02.8, O02.81, O02.89, O02.9, O03, O03.0, O03.1, O03.2, O03.3, O03.30, O03.31, O03.32, O03.33, O03.34, O03.35, O03.36, O03.37, O03.38, O03.39, O03.4, O03.5, O03.6, O03.7, O03.8, O03.80, O03.81, O03.82, O03.83, O03.84, O03.85, O03.86, O03.87, O03.88, O03.89, O03.9, O04, O04.0, O04.1, O04.2, O04.3, O04.4, O04.5, O04.6, O04.7, O04.8, O04.80, O04.81, O04.82, O04.83, O04.84, O04.85, O04.86, O04.87, O04.88, O04.89, O04.9, O05, O05.0, O05.1, O05.2, O05.3, O05.4, O05.5, O05.6, O05.7, O05.8, O05.9, O06, O06.0, O06.1, O06.2, O06.3, O06.4, O06.5, O06.6, O06.7, O06.8, O06.9, O07, O07.0, O07.1, O07.2, O07.3, O07.30, O07.31, O07.32, O07.33, O07.34, O07.35, O07.36, O07.37, O07.38, O07.39, O07.4, O07.5, O07.6, O07.7, O07.8, O07.9</p> | <p>630, 630.0, 630.9, 631, 631.0, 631.2, 631.8, 631.9, 632, 632.0, 632.9, 633, 633.0, 633.00, 633.01, 633.1, 633.10, 633.11, 633.2, 633.20, 633.21, 633.8, 633.80, 633.81, 633.9, 633.90, 633.91, 634, 634.0, 634.00, 634.01, 634.02, 634.1, 634.10, 634.11, 634.12, 634.2, 634.20, 634.21, 634.22, 634.3, 634.30, 634.31, 634.32, 634.4, 634.40, 634.41, 634.42, 634.5, 634.50, 634.51, 634.52, 634.6, 634.60, 634.61, 634.62, 634.7, 634.70, 634.71, 634.72, 634.8, 634.80, 634.81, 634.82, 634.9, 634.90, 634.91, 634.92, 635, 635.0, 635.00, 635.01, 635.02, 635.1, 635.10, 635.11, 635.12, 635.2, 635.20, 635.21, 635.22, 635.3, 635.30, 635.31, 635.32, 635.4, 635.40, 635.41, 635.42, 635.5, 635.50, 635.51, 635.52, 635.6, 635.60, 635.61, 635.62, 635.7, 635.70, 635.71, 635.72, 635.8, 635.80, 635.81, 635.82, 635.9, 635.90, 635.91, 635.92, 636, 636.0, 636.00, 636.01, 636.02, 636.1, 636.10, 636.11, 636.12, 636.2, 636.20, 636.21, 636.22, 636.3, 636.30, 636.31, 636.32, 636.4, 636.40, 636.41, 636.42, 636.5, 636.50, 636.51, 636.52, 636.6, 636.60, 636.61, 636.62, 636.7, 636.70, 636.71, 636.72, 636.8, 636.80, 636.81, 636.82, 636.9, 636.90, 636.91, 636.92, 638, 638.0, 638.01, 638.02, 638.1, 638.11, 638.12, 638.2, 638.21, 638.22, 638.3, 638.31, 638.32, 638.4, 638.41, 638.42, 638.5, 638.51, 638.52, 638.6, 638.61, 638.62, 638.7, 638.71, 638.72, 638.8, 638.81, 638.82, 638.9, 638.91, 638.92, 646.3, 646.30, 646.31, 646.33</p> | B38.0, B38.1, B38.2, B38.9 |

|                                            |                                                                                                                                                                                                                                                                                                                                                                                                                                                                                                                                                                                                                                                                                                                                                                                                                                                                                                                                                                                                                                                                                                                                                                                                                                                                                                                                                                                                                                                                                                                                                                                                                                                                                                                                                                                                                                                                                                                                                                                                                                                                                                                                                                                                                                                                                                                                                   |                                                                                                                                                                                                                                                                                                                                                                                                                                                                                                                                                                                                                                                                                                                                                                                                                                                                                                                                                                                                                                                                                                                                                                                                                                                                                                                                                                                                                                                                                                                                                                                                                                                                                                                                                                                                                                                                                                                                                                                                                                  |                   |
|--------------------------------------------|---------------------------------------------------------------------------------------------------------------------------------------------------------------------------------------------------------------------------------------------------------------------------------------------------------------------------------------------------------------------------------------------------------------------------------------------------------------------------------------------------------------------------------------------------------------------------------------------------------------------------------------------------------------------------------------------------------------------------------------------------------------------------------------------------------------------------------------------------------------------------------------------------------------------------------------------------------------------------------------------------------------------------------------------------------------------------------------------------------------------------------------------------------------------------------------------------------------------------------------------------------------------------------------------------------------------------------------------------------------------------------------------------------------------------------------------------------------------------------------------------------------------------------------------------------------------------------------------------------------------------------------------------------------------------------------------------------------------------------------------------------------------------------------------------------------------------------------------------------------------------------------------------------------------------------------------------------------------------------------------------------------------------------------------------------------------------------------------------------------------------------------------------------------------------------------------------------------------------------------------------------------------------------------------------------------------------------------------------|----------------------------------------------------------------------------------------------------------------------------------------------------------------------------------------------------------------------------------------------------------------------------------------------------------------------------------------------------------------------------------------------------------------------------------------------------------------------------------------------------------------------------------------------------------------------------------------------------------------------------------------------------------------------------------------------------------------------------------------------------------------------------------------------------------------------------------------------------------------------------------------------------------------------------------------------------------------------------------------------------------------------------------------------------------------------------------------------------------------------------------------------------------------------------------------------------------------------------------------------------------------------------------------------------------------------------------------------------------------------------------------------------------------------------------------------------------------------------------------------------------------------------------------------------------------------------------------------------------------------------------------------------------------------------------------------------------------------------------------------------------------------------------------------------------------------------------------------------------------------------------------------------------------------------------------------------------------------------------------------------------------------------------|-------------------|
| <p>Indirect maternal causes</p>            | <p>O24, O24.0, O24.01, O24.011, O24.012, O24.013, O24.019, O24.02, O24.03, O24.1, O24.11, O24.111, O24.112, O24.113, O24.119, O24.12, O24.13, O24.2, O24.3, O24.31, O24.311, O24.312, O24.313, O24.319, O24.32, O24.33, O24.4, O24.41, O24.410, O24.414, O24.419, O24.42, O24.420, O24.424, O24.429, O24.43, O24.430, O24.434, O24.439, O24.8, O24.81, O24.811, O24.812, O24.813, O24.819, O24.82, O24.83, O24.9, O24.91, O24.911, O24.912, O24.913, O24.919, O24.92, O24.93, O25, O25.1, O25.10, O25.11, O25.12, O25.13, O25.2, O25.3, O98, O98.0, O98.01, O98.011, O98.012, O98.013, O98.019, O98.02, O98.03, O98.1, O98.11, O98.111, O98.112, O98.113, O98.119, O98.12, O98.13, O98.2, O98.21, O98.211, O98.212, O98.213, O98.219, O98.22, O98.23, O98.3, O98.31, O98.311, O98.312, O98.313, O98.319, O98.32, O98.33, O98.4, O98.41, O98.411, O98.412, O98.413, O98.419, O98.42, O98.43, O98.5, O98.51, O98.511, O98.512, O98.513, O98.519, O98.52, O98.53, O98.6, O98.61, O98.611, O98.612, O98.613, O98.619, O98.62, O98.63, O98.7, O98.71, O98.711, O98.712, O98.713, O98.719, O98.72, O98.73, O98.8, O98.81, O98.811, O98.812, O98.813, O98.819, O98.82, O98.83, O98.9, O98.91, O98.911, O98.912, O98.913, O98.919, O98.92, O98.93, O99, O99.0, O99.01, O99.011, O99.012, O99.013, O99.019, O99.02, O99.03, O99.1, O99.11, O99.111, O99.112, O99.113, O99.119, O99.12, O99.13, O99.2, O99.21, O99.210, O99.211, O99.212, O99.213, O99.214, O99.215, O99.28, O99.280, O99.281, O99.282, O99.283, O99.284, O99.285, O99.3, O99.31, O99.310, O99.311, O99.312, O99.313, O99.314, O99.315, O99.32, O99.320, O99.321, O99.322, O99.323, O99.324, O99.325, O99.33, O99.330, O99.331, O99.332, O99.333, O99.334, O99.335, O99.34, O99.340, O99.341, O99.342, O99.343, O99.344, O99.345, O99.35, O99.350, O99.351, O99.352, O99.353, O99.354, O99.355, O99.4, O99.41, O99.411, O99.412, O99.413, O99.419, O99.42, O99.43, O99.5, O99.51, O99.511, O99.512, O99.513, O99.519, O99.52, O99.53, O99.6, O99.61, O99.611, O99.612, O99.613, O99.619, O99.62, O99.63, O99.7, O99.71, O99.711, O99.712, O99.713, O99.719, O99.72, O99.73, O99.8, O99.81, O99.810, O99.814, O99.815, O99.82, O99.820, O99.824, O99.825, O99.83, O99.830, O99.834, O99.835, O99.84, O99.840, O99.841, O99.842, O99.843, O99.844, O99.845, O99.89, O99.9, O99.90, O99.91</p> | <p>646, 646.0, 646.00, 646.01, 646.03, 646.1, 646.10, 646.11, 646.12, 646.13, 646.14, 646.2, 646.20, 646.21, 646.22, 646.23, 646.24, 646.4, 646.40, 646.41, 646.42, 646.43, 646.44, 646.5, 646.50, 646.51, 646.52, 646.53, 646.54, 646.6, 646.60, 646.61, 646.62, 646.63, 646.64, 646.7, 646.70, 646.71, 646.73, 646.8, 646.80, 646.81, 646.82, 646.83, 646.84, 646.9, 646.90, 646.91, 646.93, 647, 647.0, 647.00, 647.01, 647.02, 647.03, 647.04, 647.1, 647.10, 647.11, 647.12, 647.13, 647.14, 647.2, 647.20, 647.21, 647.22, 647.23, 647.24, 647.3, 647.30, 647.31, 647.32, 647.33, 647.34, 647.4, 647.40, 647.41, 647.42, 647.43, 647.44, 647.5, 647.50, 647.51, 647.52, 647.53, 647.54, 647.6, 647.60, 647.61, 647.62, 647.63, 647.64, 647.8, 647.80, 647.81, 647.82, 647.83, 647.84, 647.9, 647.90, 647.91, 647.92, 647.93, 647.94, 648, 648.0, 648.00, 648.01, 648.02, 648.03, 648.04, 648.1, 648.10, 648.11, 648.12, 648.13, 648.14, 648.2, 648.20, 648.21, 648.22, 648.23, 648.24, 648.3, 648.30, 648.31, 648.32, 648.33, 648.34, 648.4, 648.40, 648.41, 648.42, 648.43, 648.44, 648.5, 648.50, 648.51, 648.52, 648.53, 648.54, 648.6, 648.60, 648.61, 648.62, 648.63, 648.64, 648.7, 648.70, 648.71, 648.72, 648.73, 648.74, 648.8, 648.80, 648.81, 648.82, 648.83, 648.84, 648.9, 648.90, 648.91, 648.92, 648.93, 648.94, 649, 649.0, 649.00, 649.01, 649.02, 649.03, 649.04, 649.1, 649.10, 649.11, 649.12, 649.13, 649.14, 649.2, 649.20, 649.21, 649.22, 649.23, 649.24, 649.3, 649.30, 649.31, 649.32, 649.33, 649.34, 649.4, 649.40, 649.41, 649.42, 649.43, 649.44, 649.5, 649.50, 649.51, 649.53, 649.6, 649.60, 649.61, 649.62, 649.63, 649.64, 649.7, 649.70, 649.71, 649.73, 649.8, 649.81, 649.82, 649.9, 674, 674.0, 674.00, 674.01, 674.02, 674.03, 674.04, 674.1, 674.10, 674.12, 674.14, 674.2, 674.20, 674.22, 674.24, 674.3, 674.30, 674.32, 674.34, 674.4, 674.40, 674.42, 674.44, 674.5, 674.50, 674.51, 674.52, 674.53, 674.54, 674.8, 674.80, 674.82, 674.84, 674.9, 674.90, 674.92, 674.94</p> | <p>B40, B40.9</p> |
| <p>Late maternal death (after 42 days)</p> | <p>O96, O96.0, O96.1, O96.9, O97, O97.0, O97.1, O97.9</p>                                                                                                                                                                                                                                                                                                                                                                                                                                                                                                                                                                                                                                                                                                                                                                                                                                                                                                                                                                                                                                                                                                                                                                                                                                                                                                                                                                                                                                                                                                                                                                                                                                                                                                                                                                                                                                                                                                                                                                                                                                                                                                                                                                                                                                                                                         |                                                                                                                                                                                                                                                                                                                                                                                                                                                                                                                                                                                                                                                                                                                                                                                                                                                                                                                                                                                                                                                                                                                                                                                                                                                                                                                                                                                                                                                                                                                                                                                                                                                                                                                                                                                                                                                                                                                                                                                                                                  |                   |

|                                 |                                                                                                                                                                                                                                                                                                                                                                                                                                                                                                                                                                                                                                                                                                                                                                                                                                                                                                                                                                                                                                                                                                                                                                                                                                                                                                                                                                                                                                                                                                                                                                                                                                                                                                                                                                                                                                                                                                                                                                                                                                                                                                                                                                                                                                                                                                                                                                                                                                                                                                                                                                                                                                                                                                                                                                                                                                                                                                                                                                       |                                                                                                                                                                                                                                                                                                                                                                                                                                                                                                                                                                                                                                                                                                                                                                                                                                                                                                                                                                                                                                                                                                                                                                                                                                                                                                                                                                                                                                                                                                                                                                                                                                                                                                                                                                                                                                                                                                                                                                                          |                   |
|---------------------------------|-----------------------------------------------------------------------------------------------------------------------------------------------------------------------------------------------------------------------------------------------------------------------------------------------------------------------------------------------------------------------------------------------------------------------------------------------------------------------------------------------------------------------------------------------------------------------------------------------------------------------------------------------------------------------------------------------------------------------------------------------------------------------------------------------------------------------------------------------------------------------------------------------------------------------------------------------------------------------------------------------------------------------------------------------------------------------------------------------------------------------------------------------------------------------------------------------------------------------------------------------------------------------------------------------------------------------------------------------------------------------------------------------------------------------------------------------------------------------------------------------------------------------------------------------------------------------------------------------------------------------------------------------------------------------------------------------------------------------------------------------------------------------------------------------------------------------------------------------------------------------------------------------------------------------------------------------------------------------------------------------------------------------------------------------------------------------------------------------------------------------------------------------------------------------------------------------------------------------------------------------------------------------------------------------------------------------------------------------------------------------------------------------------------------------------------------------------------------------------------------------------------------------------------------------------------------------------------------------------------------------------------------------------------------------------------------------------------------------------------------------------------------------------------------------------------------------------------------------------------------------------------------------------------------------------------------------------------------------|------------------------------------------------------------------------------------------------------------------------------------------------------------------------------------------------------------------------------------------------------------------------------------------------------------------------------------------------------------------------------------------------------------------------------------------------------------------------------------------------------------------------------------------------------------------------------------------------------------------------------------------------------------------------------------------------------------------------------------------------------------------------------------------------------------------------------------------------------------------------------------------------------------------------------------------------------------------------------------------------------------------------------------------------------------------------------------------------------------------------------------------------------------------------------------------------------------------------------------------------------------------------------------------------------------------------------------------------------------------------------------------------------------------------------------------------------------------------------------------------------------------------------------------------------------------------------------------------------------------------------------------------------------------------------------------------------------------------------------------------------------------------------------------------------------------------------------------------------------------------------------------------------------------------------------------------------------------------------------------|-------------------|
| <p>Other maternal disorders</p> | <p>N98, N98.0, N98.1, N98.2, N98.3, N98.8, N98.9, O09, O09.0, O09.00, O09.01, O09.02, O09.03, O09.1, O09.10, O09.11, O09.12, O09.13, O09.2, O09.21, O09.211, O09.212, O09.213, O09.219, O09.29, O09.291, O09.292, O09.293, O09.299, O09.3, O09.30, O09.31, O09.32, O09.33, O09.4, O09.40, O09.41, O09.42, O09.43, O09.5, O09.51, O09.511, O09.512, O09.513, O09.519, O09.52, O09.521, O09.522, O09.523, O09.529, O09.6, O09.61, O09.611, O09.612, O09.613, O09.619, O09.62, O09.621, O09.622, O09.623, O09.629, O09.7, O09.70, O09.71, O09.72, O09.73, O09.8, O09.81, O09.811, O09.812, O09.813, O09.819, O09.82, O09.821, O09.822, O09.823, O09.829, O09.89, O09.891, O09.892, O09.893, O09.899, O09.9, O09.90, O09.91, O09.92, O09.93, O21, O21.0, O21.1, O21.2, O21.8, O21.9, O22, O22.0, O22.00, O22.01, O22.02, O22.03, O22.1, O22.10, O22.11, O22.12, O22.13, O22.2, O22.20, O22.21, O22.22, O22.23, O22.3, O22.30, O22.31, O22.32, O22.33, O22.4, O22.40, O22.41, O22.42, O22.43, O22.5, O22.50, O22.51, O22.52, O22.53, O22.8, O22.9, O22.90, O22.91, O22.92, O22.93, O26, O26.0, O26.00, O26.01, O26.02, O26.03, O26.1, O26.10, O26.11, O26.12, O26.13, O26.2, O26.20, O26.21, O26.22, O26.23, O26.3, O26.30, O26.31, O26.32, O26.33, O26.4, O26.40, O26.41, O26.42, O26.43, O26.5, O26.50, O26.51, O26.52, O26.53, O26.6, O26.61, O26.611, O26.612, O26.613, O26.619, O26.62, O26.63, O26.7, O26.71, O26.711, O26.712, O26.713, O26.719, O26.72, O26.73, O26.8, O26.81, O26.811, O26.812, O26.813, O26.819, O26.82, O26.821, O26.822, O26.823, O26.829, O26.83, O26.831, O26.832, O26.833, O26.839, O26.84, O26.841, O26.842, O26.843, O26.849, O26.85, O26.851, O26.852, O26.853, O26.859, O26.86, O26.87, O26.872, O26.873, O26.879, O26.89, O26.891, O26.892, O26.893, O26.899, O26.9, O26.90, O26.91, O26.92, O26.93, O28, O28.0, O28.1, O28.2, O28.3, O28.4, O28.5, O28.8, O28.9, O29, O29.0, O29.01, O29.011, O29.012, O29.013, O29.019, O29.02, O29.021, O29.022, O29.023, O29.029, O29.09, O29.091, O29.092, O29.093, O29.099, O29.1, O29.11, O29.111, O29.112, O29.113, O29.119, O29.12, O29.121, O29.122, O29.123, O29.129, O29.19, O29.191, O29.192, O29.193, O29.199, O29.2, O29.21, O29.211, O29.212, O29.213, O29.219, O29.29, O29.291, O29.292, O29.293, O29.299, O29.3, O29.4, O29.40, O29.41, O29.42, O29.43, O29.5, O29.6, O29.60, O29.61, O29.62, O29.63, O29.8, O29.9, O29.90, O29.91, O29.92, O29.93, O30, O30.0, O30.00, O30.001, O30.002, O30.003, O30.009, O30.01, O30.011, O30.012, O30.013, O30.019, O30.02, O30.021, O30.022, O30.023, O30.029, O30.03, O30.031, O30.032, O30.033, O30.039, O30.04, O30.041, O30.042, O30.043, O30.049, O30.09, O30.091, O30.092, O30.093, O30.099, O30.1, O30.10, O30.101, O30.102, O30.103, O30.109, O30.11, O30.111, O30.112, O30.113, O30.119, O30.12, O30.121, O30.122, O30.123, O30.129, O30.19, O30.191, O30.192, O30.193, O30.199, O30.2, O30.20, O30.201, O30.202, O30.203, O30.209</p> | <p>643, 643.0, 643.00, 643.01, 643.03, 643.1, 643.10, 643.11, 643.13, 643.2, 643.20, 643.21, 643.23, 643.8, 643.80, 643.81, 643.83, 643.9, 643.90, 643.91, 643.93, 644, 644.0, 644.00, 644.03, 644.1, 644.10, 644.13, 644.2, 644.20, 644.21, 645, 645.0, 645.01, 645.03, 645.1, 645.10, 645.11, 645.13, 645.2, 645.20, 645.21, 645.23, 650, 650.0, 650.5, 651, 651.0, 651.00, 651.01, 651.03, 651.1, 651.10, 651.11, 651.13, 651.2, 651.20, 651.21, 651.23, 651.3, 651.30, 651.31, 651.33, 651.4, 651.40, 651.41, 651.43, 651.5, 651.50, 651.51, 651.53, 651.6, 651.60, 651.61, 651.63, 651.7, 651.70, 651.71, 651.73, 651.8, 651.80, 651.81, 651.83, 651.9, 651.90, 651.91, 651.93, 652, 652.0, 652.00, 652.01, 652.03, 652.1, 652.10, 652.11, 652.13, 652.2, 652.20, 652.21, 652.23, 652.3, 652.30, 652.31, 652.33, 652.4, 652.40, 652.41, 652.43, 652.5, 652.50, 652.51, 652.53, 652.6, 652.60, 652.61, 652.63, 652.7, 652.70, 652.71, 652.73, 652.8, 652.80, 652.81, 652.83, 652.9, 652.90, 652.91, 652.93, 653, 653.0, 653.00, 653.01, 653.03, 653.1, 653.10, 653.11, 653.13, 653.2, 653.20, 653.21, 653.23, 653.3, 653.30, 653.31, 653.33, 653.4, 653.40, 653.41, 653.43, 653.5, 653.50, 653.51, 653.53, 653.6, 653.60, 653.61, 653.63, 653.7, 653.70, 653.71, 653.73, 653.8, 653.80, 653.81, 653.83, 653.9, 653.90, 653.91, 653.93, 654, 654.0, 654.00, 654.01, 654.02, 654.03, 654.04, 654.1, 654.10, 654.11, 654.12, 654.13, 654.14, 654.2, 654.20, 654.21, 654.23, 654.24, 654.3, 654.30, 654.31, 654.32, 654.33, 654.34, 654.4, 654.40, 654.41, 654.42, 654.43, 654.44, 654.5, 654.50, 654.51, 654.52, 654.53, 654.54, 654.6, 654.60, 654.61, 654.62, 654.63, 654.64, 654.7, 654.70, 654.71, 654.72, 654.73, 654.74, 654.8, 654.80, 654.81, 654.82, 654.83, 654.84, 654.9, 654.90, 654.91, 654.92, 654.93, 654.94, 655, 655.0, 655.00, 655.01, 655.03, 655.1, 655.10, 655.11, 655.13, 655.2, 655.20, 655.21, 655.23, 655.3, 655.30, 655.31, 655.33, 655.4, 655.40, 655.41</p> | <p>B41, B41.9</p> |
|---------------------------------|-----------------------------------------------------------------------------------------------------------------------------------------------------------------------------------------------------------------------------------------------------------------------------------------------------------------------------------------------------------------------------------------------------------------------------------------------------------------------------------------------------------------------------------------------------------------------------------------------------------------------------------------------------------------------------------------------------------------------------------------------------------------------------------------------------------------------------------------------------------------------------------------------------------------------------------------------------------------------------------------------------------------------------------------------------------------------------------------------------------------------------------------------------------------------------------------------------------------------------------------------------------------------------------------------------------------------------------------------------------------------------------------------------------------------------------------------------------------------------------------------------------------------------------------------------------------------------------------------------------------------------------------------------------------------------------------------------------------------------------------------------------------------------------------------------------------------------------------------------------------------------------------------------------------------------------------------------------------------------------------------------------------------------------------------------------------------------------------------------------------------------------------------------------------------------------------------------------------------------------------------------------------------------------------------------------------------------------------------------------------------------------------------------------------------------------------------------------------------------------------------------------------------------------------------------------------------------------------------------------------------------------------------------------------------------------------------------------------------------------------------------------------------------------------------------------------------------------------------------------------------------------------------------------------------------------------------------------------------|------------------------------------------------------------------------------------------------------------------------------------------------------------------------------------------------------------------------------------------------------------------------------------------------------------------------------------------------------------------------------------------------------------------------------------------------------------------------------------------------------------------------------------------------------------------------------------------------------------------------------------------------------------------------------------------------------------------------------------------------------------------------------------------------------------------------------------------------------------------------------------------------------------------------------------------------------------------------------------------------------------------------------------------------------------------------------------------------------------------------------------------------------------------------------------------------------------------------------------------------------------------------------------------------------------------------------------------------------------------------------------------------------------------------------------------------------------------------------------------------------------------------------------------------------------------------------------------------------------------------------------------------------------------------------------------------------------------------------------------------------------------------------------------------------------------------------------------------------------------------------------------------------------------------------------------------------------------------------------------|-------------------|



|                                                     |                                                                                                                                                                                                                                                                                                                                                                                                                                                                                                                                                                                                                                                                                                                                                                                                                                                                                                                                                                                                                                                                                                                                                                                                                                                                                                                                                                                                                                                                                                                                                                                                                                                                                                                                                                                                                                                                                                                                                                                                                                                                                                                                                                                                                                                                                                                                                                                                                                                                                                                                                                                      |                                                                                                                                                                                                                                                                                                                                                                                                                                                                                                                                                                                                                                                                                                                                                                                                                                                                                                                                                                                                                                                                                                                                                                                                                                                                                                                                                                                                                                                                                                                                                                                                                                                                                                                                                                                                                                                                                                                                                                                                                |  |
|-----------------------------------------------------|--------------------------------------------------------------------------------------------------------------------------------------------------------------------------------------------------------------------------------------------------------------------------------------------------------------------------------------------------------------------------------------------------------------------------------------------------------------------------------------------------------------------------------------------------------------------------------------------------------------------------------------------------------------------------------------------------------------------------------------------------------------------------------------------------------------------------------------------------------------------------------------------------------------------------------------------------------------------------------------------------------------------------------------------------------------------------------------------------------------------------------------------------------------------------------------------------------------------------------------------------------------------------------------------------------------------------------------------------------------------------------------------------------------------------------------------------------------------------------------------------------------------------------------------------------------------------------------------------------------------------------------------------------------------------------------------------------------------------------------------------------------------------------------------------------------------------------------------------------------------------------------------------------------------------------------------------------------------------------------------------------------------------------------------------------------------------------------------------------------------------------------------------------------------------------------------------------------------------------------------------------------------------------------------------------------------------------------------------------------------------------------------------------------------------------------------------------------------------------------------------------------------------------------------------------------------------------------|----------------------------------------------------------------------------------------------------------------------------------------------------------------------------------------------------------------------------------------------------------------------------------------------------------------------------------------------------------------------------------------------------------------------------------------------------------------------------------------------------------------------------------------------------------------------------------------------------------------------------------------------------------------------------------------------------------------------------------------------------------------------------------------------------------------------------------------------------------------------------------------------------------------------------------------------------------------------------------------------------------------------------------------------------------------------------------------------------------------------------------------------------------------------------------------------------------------------------------------------------------------------------------------------------------------------------------------------------------------------------------------------------------------------------------------------------------------------------------------------------------------------------------------------------------------------------------------------------------------------------------------------------------------------------------------------------------------------------------------------------------------------------------------------------------------------------------------------------------------------------------------------------------------------------------------------------------------------------------------------------------------|--|
| <p>Other<br/>maternal<br/>disorders<br/>(cont.)</p> | <p>O30.21, O30.211, O30.212, O30.213, O30.219, O30.22, O30.221, O30.222, O30.223, O30.229, O30.29, O30.291, O30.292, O30.293, O30.299, O30.8, O30.80, O30.801, O30.802, O30.803, O30.809, O30.81, O30.811, O30.812, O30.813, O30.819, O30.82, O30.821, O30.822, O30.823, O30.829, O30.89, O30.891, O30.892, O30.893, O30.899, O30.9, O30.90, O30.91, O30.92, O30.93, O31, O31.0, O31.00, O31.01, O31.02, O31.03, O31.1, O31.10, O31.11, O31.12, O31.13, O31.2, O31.20, O31.21, O31.22, O31.23, O31.3, O31.30, O31.31, O31.32, O31.33, O31.8, O32, O32.0, O32.1, O32.2, O32.3, O32.4, O32.5, O32.6, O32.8, O32.9, O33, O33.0, O33.1, O33.2, O33.3, O33.4, O33.5, O33.6, O33.7, O33.8, O33.9, O34, O34.0, O34.00, O34.01, O34.02, O34.03, O34.1, O34.10, O34.11, O34.12, O34.13, O34.2, O34.21, O34.29, O34.3, O34.30, O34.31, O34.32, O34.33, O34.4, O34.40, O34.41, O34.42, O34.43, O34.5, O34.51, O34.511, O34.512, O34.513, O34.519, O34.52, O34.521, O34.522, O34.523, O34.529, O34.53, O34.531, O34.532, O34.533, O34.539, O34.59, O34.591, O34.592, O34.593, O34.599, O34.6, O34.60, O34.61, O34.62, O34.63, O34.7, O34.70, O34.71, O34.72, O34.73, O34.8, O34.80, O34.81, O34.82, O34.83, O34.9, O34.90, O34.91, O34.92, O34.93, O35, O35.0, O35.1, O35.2, O35.3, O35.4, O35.5, O35.6, O35.7, O35.8, O35.9, O36, O36.0, O36.01, O36.011, O36.0110, O36.0111, O36.0112, O36.0113, O36.0114, O36.0115, O36.0119, O36.012, O36.0120, O36.0121, O36.0122, O36.0123, O36.0124, O36.0125, O36.0129, O36.013, O36.0130, O36.0131, O36.0132, O36.0133, O36.0134, O36.0135, O36.0139, O36.019, O36.0190, O36.0191, O36.0192, O36.0193, O36.0194, O36.0195, O36.0199, O36.09, O36.091, O36.0910, O36.0911, O36.0912, O36.0913, O36.0914, O36.0915, O36.0919, O36.092, O36.0920, O36.0921, O36.0922, O36.0923, O36.0924, O36.0925, O36.0929, O36.093, O36.0930, O36.0931, O36.0932, O36.0933, O36.0934, O36.0935, O36.0939, O36.099, O36.0990, O36.0991, O36.0992, O36.0993, O36.0994, O36.0995, O36.0999, O36.1, O36.11, O36.111, O36.1110, O36.1111, O36.1112, O36.1113, O36.1114, O36.1115, O36.1119, O36.112, O36.1120, O36.1121, O36.1122, O36.1123, O36.1124, O36.1125, O36.1129, O36.113, O36.1130, O36.1131, O36.1132, O36.1133, O36.1134, O36.1135, O36.1139, O36.119, O36.1190, O36.1191, O36.1192, O36.1193, O36.1194, O36.1195, O36.1199, O36.19, O36.191, O36.1910, O36.1911, O36.1912, O36.1913, O36.1914, O36.1915, O36.1919, O36.192, O36.1920, O36.1921, O36.1922, O36.1923, O36.1924, O36.1925, O36.1929, O36.193, O36.1930, O36.1931, O36.1932, O36.1933, O36.1934</p> | <p>655.43, 655.5, 655.50, 655.51, 655.53, 655.6, 655.60, 655.61, 655.63, 655.7, 655.70, 655.71, 655.73, 655.8, 655.80, 655.81, 655.83, 655.9, 655.90, 655.91, 655.93, 656, 656.0, 656.00, 656.01, 656.03, 656.1, 656.10, 656.11, 656.13, 656.2, 656.20, 656.21, 656.23, 656.3, 656.30, 656.31, 656.33, 656.4, 656.40, 656.41, 656.43, 656.5, 656.50, 656.51, 656.53, 656.6, 656.60, 656.61, 656.63, 656.7, 656.70, 656.71, 656.73, 656.8, 656.80, 656.81, 656.83, 656.9, 656.90, 656.91, 656.93, 657, 657.0, 657.00, 657.01, 657.03, 657.1, 658, 658.0, 658.00, 658.01, 658.03, 658.1, 658.10, 658.11, 658.13, 658.2, 658.20, 658.21, 658.23, 658.3, 658.30, 658.31, 658.33, 658.4, 658.40, 658.41, 658.43, 658.8, 658.80, 658.81, 658.83, 658.9, 658.90, 658.91, 658.93, 659, 659.0, 659.00, 659.01, 659.03, 659.1, 659.10, 659.11, 659.13, 659.2, 659.20, 659.21, 659.23, 659.4, 659.40, 659.41, 659.43, 659.5, 659.50, 659.51, 659.53, 659.6, 659.60, 659.61, 659.63, 659.7, 659.70, 659.71, 659.73, 659.8, 659.80, 659.81, 659.83, 659.9, 659.90, 659.91, 659.93, 661, 661.0, 661.00, 661.01, 661.03, 661.1, 661.10, 661.11, 661.13, 661.2, 661.20, 661.21, 661.23, 661.3, 661.30, 661.31, 661.33, 661.4, 661.40, 661.41, 661.43, 661.9, 661.90, 661.91, 661.93, 662, 662.0, 662.00, 662.01, 662.03, 662.1, 662.10, 662.11, 662.13, 662.2, 662.20, 662.21, 662.23, 662.3, 662.30, 662.31, 662.33, 662.8, 663, 663.0, 663.00, 663.01, 663.03, 663.1, 663.10, 663.11, 663.13, 663.2, 663.20, 663.21, 663.23, 663.3, 663.30, 663.31, 663.33, 663.4, 663.40, 663.41, 663.43, 663.5, 663.50, 663.51, 663.53, 663.6, 663.60, 663.61, 663.63, 663.8, 663.80, 663.81, 663.83, 663.9, 663.90, 663.91, 663.93, 664, 664.0, 664.00, 664.01, 664.04, 664.1, 664.10, 664.11, 664.14, 664.2, 664.20, 664.21, 664.24, 664.3, 664.30, 664.31, 664.34, 664.4, 664.40, 664.41, 664.44, 664.5, 664.50, 664.51, 664.54, 664.6, 664.60, 664.61, 664.64, 664.8, 664.80, 664.81, 664.84, 664.9, 664.90, 664.91, 664.94, 665.4</p> |  |
|-----------------------------------------------------|--------------------------------------------------------------------------------------------------------------------------------------------------------------------------------------------------------------------------------------------------------------------------------------------------------------------------------------------------------------------------------------------------------------------------------------------------------------------------------------------------------------------------------------------------------------------------------------------------------------------------------------------------------------------------------------------------------------------------------------------------------------------------------------------------------------------------------------------------------------------------------------------------------------------------------------------------------------------------------------------------------------------------------------------------------------------------------------------------------------------------------------------------------------------------------------------------------------------------------------------------------------------------------------------------------------------------------------------------------------------------------------------------------------------------------------------------------------------------------------------------------------------------------------------------------------------------------------------------------------------------------------------------------------------------------------------------------------------------------------------------------------------------------------------------------------------------------------------------------------------------------------------------------------------------------------------------------------------------------------------------------------------------------------------------------------------------------------------------------------------------------------------------------------------------------------------------------------------------------------------------------------------------------------------------------------------------------------------------------------------------------------------------------------------------------------------------------------------------------------------------------------------------------------------------------------------------------------|----------------------------------------------------------------------------------------------------------------------------------------------------------------------------------------------------------------------------------------------------------------------------------------------------------------------------------------------------------------------------------------------------------------------------------------------------------------------------------------------------------------------------------------------------------------------------------------------------------------------------------------------------------------------------------------------------------------------------------------------------------------------------------------------------------------------------------------------------------------------------------------------------------------------------------------------------------------------------------------------------------------------------------------------------------------------------------------------------------------------------------------------------------------------------------------------------------------------------------------------------------------------------------------------------------------------------------------------------------------------------------------------------------------------------------------------------------------------------------------------------------------------------------------------------------------------------------------------------------------------------------------------------------------------------------------------------------------------------------------------------------------------------------------------------------------------------------------------------------------------------------------------------------------------------------------------------------------------------------------------------------------|--|

|                                         |                                                                                                                                                                                                                                                                                                                                                                                                                                                                                                                                                                                                                                                                                                                                                                                                                                                                                                                                                                                                                                                                                                                                                                                                                                                                                                                                                                                                                                                                                                                                                                                                                                                                                                                                                                                                                                                                                                                                                                                                                                                                                                                                                                                                                                                                                                                                                                                                                                                                                                                                                                                                                         |                                                                                                                                                                                                                                                                                                                                                                                                                                                                                                                                                                                                                                                                                                                                                                                                                                                                                                                                                                                                                                                                                                                                                                                                                                                                                                                                                                                                                                                                                                                                                                                                                                                                                                                                                                   |  |
|-----------------------------------------|-------------------------------------------------------------------------------------------------------------------------------------------------------------------------------------------------------------------------------------------------------------------------------------------------------------------------------------------------------------------------------------------------------------------------------------------------------------------------------------------------------------------------------------------------------------------------------------------------------------------------------------------------------------------------------------------------------------------------------------------------------------------------------------------------------------------------------------------------------------------------------------------------------------------------------------------------------------------------------------------------------------------------------------------------------------------------------------------------------------------------------------------------------------------------------------------------------------------------------------------------------------------------------------------------------------------------------------------------------------------------------------------------------------------------------------------------------------------------------------------------------------------------------------------------------------------------------------------------------------------------------------------------------------------------------------------------------------------------------------------------------------------------------------------------------------------------------------------------------------------------------------------------------------------------------------------------------------------------------------------------------------------------------------------------------------------------------------------------------------------------------------------------------------------------------------------------------------------------------------------------------------------------------------------------------------------------------------------------------------------------------------------------------------------------------------------------------------------------------------------------------------------------------------------------------------------------------------------------------------------------|-------------------------------------------------------------------------------------------------------------------------------------------------------------------------------------------------------------------------------------------------------------------------------------------------------------------------------------------------------------------------------------------------------------------------------------------------------------------------------------------------------------------------------------------------------------------------------------------------------------------------------------------------------------------------------------------------------------------------------------------------------------------------------------------------------------------------------------------------------------------------------------------------------------------------------------------------------------------------------------------------------------------------------------------------------------------------------------------------------------------------------------------------------------------------------------------------------------------------------------------------------------------------------------------------------------------------------------------------------------------------------------------------------------------------------------------------------------------------------------------------------------------------------------------------------------------------------------------------------------------------------------------------------------------------------------------------------------------------------------------------------------------|--|
| <p>Other maternal disorders (cont.)</p> | <p>O36.1935, O36.1939, O36.199, O36.1990, O36.1991, O36.1992, O36.1993, O36.1994, O36.1995, O36.1999, O36.2, O36.20, O36.21, O36.22, O36.23, O36.3, O36.4, O36.5, O36.51, O36.511, O36.5110, O36.5111, O36.5112, O36.5113, O36.5114, O36.5115, O36.5119, O36.512, O36.5120, O36.5121, O36.5122, O36.5123, O36.5124, O36.5125, O36.5129, O36.513, O36.5130, O36.5131, O36.5132, O36.5133, O36.5134, O36.5135, O36.5139, O36.519, O36.5190, O36.5191, O36.5192, O36.5193, O36.5194, O36.5195, O36.5199, O36.59, O36.591, O36.5910, O36.5911, O36.5912, O36.5913, O36.5914, O36.5915, O36.5919, O36.592, O36.5920, O36.5921, O36.5922, O36.5923, O36.5924, O36.5925, O36.5929, O36.593, O36.5930, O36.5931, O36.5932, O36.5933, O36.5934, O36.5935, O36.5939, O36.599, O36.5990, O36.5991, O36.5992, O36.5993, O36.5994, O36.5995, O36.5999, O36.6, O36.60, O36.61, O36.62, O36.63, O36.7, O36.70, O36.71, O36.72, O36.73, O36.8, O36.80, O36.81, O36.812, O36.8120, O36.8121, O36.8122, O36.8123, O36.8124, O36.8125, O36.8129, O36.813, O36.8130, O36.8131, O36.8132, O36.8133, O36.8134, O36.8135, O36.8139, O36.819, O36.8190, O36.8191, O36.8192, O36.8193, O36.8194, O36.8195, O36.8199, O36.82, O36.821, O36.8210, O36.8211, O36.8212, O36.8213, O36.8214, O36.8215, O36.8219, O36.822, O36.8220, O36.8221, O36.8222, O36.8223, O36.8224, O36.8225, O36.8229, O36.823, O36.8230, O36.8231, O36.8232, O36.8233, O36.8234, O36.8235, O36.8239, O36.829, O36.8290, O36.8291, O36.8292, O36.8293, O36.8294, O36.8295, O36.8299, O36.89, O36.891, O36.8910, O36.8911, O36.8912, O36.8913, O36.8914, O36.8915, O36.8919, O36.892, O36.8920, O36.8921, O36.8922, O36.8923, O36.8924, O36.8925, O36.8929, O36.893, O36.8930, O36.8931, O36.8932, O36.8933, O36.8934, O36.8935, O36.8939, O36.899, O36.8990, O36.8991, O36.8992, O36.8993, O36.8994, O36.8995, O36.8999, O36.9, O36.90, O36.91, O36.92, O36.93, O40, O40.1, O40.2, O40.3, O40.9, O41, O41.0, O41.00, O41.01, O41.02, O41.03, O41.1, O41.10, O41.101, O41.1010, O41.1011, O41.1012, O41.1013, O41.1014, O41.1015, O41.1019, O41.102, O41.1020, O41.1021, O41.1022, O41.1023, O41.1024, O41.1025, O41.1029, O41.103, O41.1030, O41.1031, O41.1032, O41.1033, O41.1034, O41.1035, O41.1039, O41.109, O41.1090, O41.1091, O41.1092, O41.1093, O41.1094, O41.1095, O41.1099, O41.12, O41.121, O41.1210, O41.1211, O41.1212, O41.1213, O41.1214, O41.1215, O41.1219, O41.122, O41.1220, O41.1221, O41.1222, O41.1223, O41.1224, O41.1225, O41.1229, O41.123, O41.1230, O41.1231, O41.1232, O41.1233, O41.1234, O41.1235, O41.1239, O41.129, O41.1290, O41.1291</p> | <p>, 665.40, 665.41, 665.44, 665.5, 665.50, 665.51, 665.54, 665.6, 665.60, 665.61, 665.64, 665.7, 665.70, 665.71, 665.72, 665.74, 665.8, 665.80, 665.81, 665.82, 665.83, 665.84, 665.9, 665.90, 665.91, 665.92, 665.93, 665.94, 667, 667.0, 667.00, 667.02, 667.04, 667.1, 667.10, 667.12, 667.14, 667.9, 668, 668.0, 668.00, 668.01, 668.02, 668.03, 668.04, 668.1, 668.10, 668.11, 668.12, 668.13, 668.14, 668.2, 668.20, 668.21, 668.22, 668.23, 668.24, 668.8, 668.80, 668.81, 668.82, 668.83, 668.84, 668.9, 668.90, 668.91, 668.92, 668.93, 668.94, 669, 669.0, 669.00, 669.01, 669.02, 669.03, 669.04, 669.1, 669.10, 669.11, 669.12, 669.13, 669.14, 669.2, 669.20, 669.21, 669.22, 669.23, 669.24, 669.3, 669.30, 669.32, 669.34, 669.4, 669.40, 669.41, 669.42, 669.43, 669.44, 669.5, 669.50, 669.51, 669.6, 669.60, 669.61, 669.7, 669.70, 669.71, 669.8, 669.80, 669.81, 669.82, 669.83, 669.84, 669.9, 669.90, 669.91, 669.92, 669.93, 669.94, 671, 671.0, 671.00, 671.01, 671.02, 671.03, 671.04, 671.1, 671.10, 671.11, 671.12, 671.13, 671.14, 671.2, 671.20, 671.21, 671.22, 671.23, 671.24, 671.3, 671.30, 671.31, 671.33, 671.4, 671.40, 671.42, 671.44, 671.5, 671.50, 671.51, 671.52, 671.53, 671.54, 671.8, 671.80, 671.81, 671.82, 671.83, 671.84, 671.9, 671.90, 671.91, 671.92, 671.93, 671.94, 672, 672.0, 672.00, 672.02, 672.04, 673, 673.0, 673.00, 673.01, 673.02, 673.03, 673.04, 673.1, 673.10, 673.11, 673.12, 673.13, 673.14, 673.2, 673.20, 673.21, 673.22, 673.23, 673.24, 673.3, 673.30, 673.31, 673.32, 673.33, 673.34, 673.8, 673.80, 673.81, 673.82, 673.83, 673.84, 673.9, 675, 675.0, 675.00, 675.01, 675.02, 675.03, 675.04, 675.1, 675.10, 675.11, 675.12, 675.13, 675.14, 675.2, 675.20, 675.21, 675.22, 675.23</p> |  |
|-----------------------------------------|-------------------------------------------------------------------------------------------------------------------------------------------------------------------------------------------------------------------------------------------------------------------------------------------------------------------------------------------------------------------------------------------------------------------------------------------------------------------------------------------------------------------------------------------------------------------------------------------------------------------------------------------------------------------------------------------------------------------------------------------------------------------------------------------------------------------------------------------------------------------------------------------------------------------------------------------------------------------------------------------------------------------------------------------------------------------------------------------------------------------------------------------------------------------------------------------------------------------------------------------------------------------------------------------------------------------------------------------------------------------------------------------------------------------------------------------------------------------------------------------------------------------------------------------------------------------------------------------------------------------------------------------------------------------------------------------------------------------------------------------------------------------------------------------------------------------------------------------------------------------------------------------------------------------------------------------------------------------------------------------------------------------------------------------------------------------------------------------------------------------------------------------------------------------------------------------------------------------------------------------------------------------------------------------------------------------------------------------------------------------------------------------------------------------------------------------------------------------------------------------------------------------------------------------------------------------------------------------------------------------------|-------------------------------------------------------------------------------------------------------------------------------------------------------------------------------------------------------------------------------------------------------------------------------------------------------------------------------------------------------------------------------------------------------------------------------------------------------------------------------------------------------------------------------------------------------------------------------------------------------------------------------------------------------------------------------------------------------------------------------------------------------------------------------------------------------------------------------------------------------------------------------------------------------------------------------------------------------------------------------------------------------------------------------------------------------------------------------------------------------------------------------------------------------------------------------------------------------------------------------------------------------------------------------------------------------------------------------------------------------------------------------------------------------------------------------------------------------------------------------------------------------------------------------------------------------------------------------------------------------------------------------------------------------------------------------------------------------------------------------------------------------------------|--|

|                                         |                                                                                                                                                                                                                                                                                                                                                                                                                                                                                                                                                                                                                                                                                                                                                                                                                                                                                                                                                                                                                                                                                                                                                                                                                                                                                                                                                                                                                                                                                                                                                                                                                                                                                                                                                                                                                                                                                                                                                                                                                                                                                                                                                                                                                                                                                                                                                                                                                                                                                                                                                                                                                                                                                                                                                                                                                                                          |                                                                                                                                                                                                                                                                                                                                                                                                                                                                                                                                                                                                                                                                                                                                    |  |
|-----------------------------------------|----------------------------------------------------------------------------------------------------------------------------------------------------------------------------------------------------------------------------------------------------------------------------------------------------------------------------------------------------------------------------------------------------------------------------------------------------------------------------------------------------------------------------------------------------------------------------------------------------------------------------------------------------------------------------------------------------------------------------------------------------------------------------------------------------------------------------------------------------------------------------------------------------------------------------------------------------------------------------------------------------------------------------------------------------------------------------------------------------------------------------------------------------------------------------------------------------------------------------------------------------------------------------------------------------------------------------------------------------------------------------------------------------------------------------------------------------------------------------------------------------------------------------------------------------------------------------------------------------------------------------------------------------------------------------------------------------------------------------------------------------------------------------------------------------------------------------------------------------------------------------------------------------------------------------------------------------------------------------------------------------------------------------------------------------------------------------------------------------------------------------------------------------------------------------------------------------------------------------------------------------------------------------------------------------------------------------------------------------------------------------------------------------------------------------------------------------------------------------------------------------------------------------------------------------------------------------------------------------------------------------------------------------------------------------------------------------------------------------------------------------------------------------------------------------------------------------------------------------------|------------------------------------------------------------------------------------------------------------------------------------------------------------------------------------------------------------------------------------------------------------------------------------------------------------------------------------------------------------------------------------------------------------------------------------------------------------------------------------------------------------------------------------------------------------------------------------------------------------------------------------------------------------------------------------------------------------------------------------|--|
| <p>Other maternal disorders (cont.)</p> | <p>O41.1292, O41.1293, O41.1294, O41.1295, O41.1299, O41.14, O41.141, O41.1410, O41.1411, O41.1412, O41.1413, O41.1414, O41.1415, O41.1419, O41.142, O41.1420, O41.1421, O41.1422, O41.1423, O41.1424, O41.1425, O41.1429, O41.143, O41.1430, O41.1431, O41.1432, O41.1433, O41.1434, O41.1435, O41.1439, O41.149, O41.1490, O41.1491, O41.1492, O41.1493, O41.1494, O41.1495, O41.1499, O41.8, O41.9, O41.90, O41.91, O41.92, O41.93, O42, O42.0, O42.00, O42.01, O42.011, O42.012, O42.013, O42.019, O42.02, O42.1, O42.10, O42.11, O42.111, O42.112, O42.113, O42.119, O42.12, O42.2, O42.9, O42.90, O42.91, O42.911, O42.912, O42.913, O42.919, O42.92, O43, O43.0, O43.01, O43.011, O43.012, O43.013, O43.019, O43.02, O43.021, O43.022, O43.023, O43.029, O43.1, O43.10, O43.101, O43.102, O43.103, O43.109, O43.11, O43.111, O43.112, O43.113, O43.119, O43.12, O43.121, O43.122, O43.123, O43.129, O43.19, O43.191, O43.192, O43.193, O43.199, O43.8, O43.81, O43.811, O43.812, O43.813, O43.819, O43.89, O43.891, O43.892, O43.893, O43.899, O43.9, O43.90, O43.91, O43.92, O43.93, O47, O47.0, O47.00, O47.02, O47.03, O47.1, O47.9, O48, O48.0, O48.1, O60, O60.0, O60.00, O60.02, O60.03, O60.1, O60.10, O60.12, O60.13, O60.14, O60.2, O60.20, O60.22, O60.23, O61, O61.0, O61.1, O61.8, O61.9, O62, O62.0, O62.1, O62.2, O62.3, O62.4, O62.8, O62.9, O63, O63.0, O63.1, O63.2, O63.9, O68, O68.0, O68.1, O68.2, O68.3, O68.8, O68.9, O69, O69.0, O69.1, O69.2, O69.3, O69.4, O69.5, O69.8, O69.81, O69.82, O69.89, O69.9, O70.0, O70.1, O70.2, O70.3, O70.4, O70.9, O73, O73.0, O73.1, O74, O74.0, O74.1, O74.2, O74.3, O74.4, O74.5, O74.6, O74.7, O74.8, O74.9, O75, O75.0, O75.1, O75.2, O75.3, O75.4, O75.5, O75.6, O75.7, O75.8, O75.81, O75.82, O75.89, O75.9, O76, O77, O77.0, O77.1, O77.8, O77.9, O80, O80.0, O80.1, O80.8, O80.9, O81, O81.0, O81.1, O81.2, O81.3, O81.4, O81.5, O82, O82.0, O82.1, O82.2, O82.8, O82.9, O83, O83.0, O83.1, O83.2, O83.3, O83.4, O83.8, O83.9, O84, O84.0, O84.1, O84.2, O84.8, O84.9, O87, O87.0, O87.1, O87.2, O87.3, O87.4, O87.8, O87.9, O88, O88.0, O88.01, O88.011, O88.012, O88.013, O88.019, O88.02, O88.03, O88.1, O88.11, O88.111, O88.112, O88.113, O88.119, O88.12, O88.13, O88.2, O88.21, O88.211, O88.212, O88.213, O88.219, O88.22, O88.23, O88.3, O88.31, O88.311, O88.312, O88.313, O88.319, O88.32, O88.33, O88.8, O88.81, O88.811, O88.812, O88.813, O88.819, O88.82, O88.83, O89, O89.0, O89.01, O89.09, O89.1, O89.2, O89.3, O89.4, O89.5, O89.6, O89.8, O89.9, O90, O90.0, O90.1, O90.2, O90.3, O90.4, O90.5, O90.6, O90.8, O90.81, O90.89, O90.9, O92, O92.0, O92.01, O92.011, O92.012, O92.013, O92.019, O92.02, O92.03, O92.1, O92.11, O92.111, O92.112, O92.113, O92.119, O92.12, O92.13, O92.2, O92.20, O92.29, O92.3, O92.4, O92.5, O92.6, O92.7, O92.70, O92.79</p> | <p>675.24, 675.8, 675.80, 675.81, 675.82, 675.83, 675.84, 675.9, 675.90, 675.91, 675.92, 675.93, 675.94, 676, 676.0, 676.00, 676.01, 676.02, 676.03, 676.04, 676.1, 676.10, 676.11, 676.12, 676.13, 676.14, 676.2, 676.20, 676.21, 676.22, 676.23, 676.24, 676.3, 676.30, 676.31, 676.32, 676.33, 676.34, 676.4, 676.40, 676.41, 676.42, 676.43, 676.44, 676.5, 676.50, 676.51, 676.52, 676.53, 676.54, 676.6, 676.60, 676.61, 676.62, 676.63, 676.64, 676.8, 676.80, 676.81, 676.82, 676.83, 676.84, 676.9, 676.90, 676.91, 676.92, 676.93, 676.94, 677, 678, 678.0, 678.00, 678.01, 678.03, 678.1, 678.10, 678.11, 678.13, 679, 679.0, 679.00, 679.01, 679.02, 679.03, 679.04, 679.1, 679.10, 679.11, 679.12, 679.13, 679.14</p> |  |
|-----------------------------------------|----------------------------------------------------------------------------------------------------------------------------------------------------------------------------------------------------------------------------------------------------------------------------------------------------------------------------------------------------------------------------------------------------------------------------------------------------------------------------------------------------------------------------------------------------------------------------------------------------------------------------------------------------------------------------------------------------------------------------------------------------------------------------------------------------------------------------------------------------------------------------------------------------------------------------------------------------------------------------------------------------------------------------------------------------------------------------------------------------------------------------------------------------------------------------------------------------------------------------------------------------------------------------------------------------------------------------------------------------------------------------------------------------------------------------------------------------------------------------------------------------------------------------------------------------------------------------------------------------------------------------------------------------------------------------------------------------------------------------------------------------------------------------------------------------------------------------------------------------------------------------------------------------------------------------------------------------------------------------------------------------------------------------------------------------------------------------------------------------------------------------------------------------------------------------------------------------------------------------------------------------------------------------------------------------------------------------------------------------------------------------------------------------------------------------------------------------------------------------------------------------------------------------------------------------------------------------------------------------------------------------------------------------------------------------------------------------------------------------------------------------------------------------------------------------------------------------------------------------------|------------------------------------------------------------------------------------------------------------------------------------------------------------------------------------------------------------------------------------------------------------------------------------------------------------------------------------------------------------------------------------------------------------------------------------------------------------------------------------------------------------------------------------------------------------------------------------------------------------------------------------------------------------------------------------------------------------------------------------|--|

Appendix Table 3: Causes of death partially reassigned to maternal causes

| <b>Appendix Table 3: Maternal death rates before and after garbage code redistribution and % change for global deaths, 7 GBD super regions, and 21 GBD regions.</b> |                                    |                                   |          |
|---------------------------------------------------------------------------------------------------------------------------------------------------------------------|------------------------------------|-----------------------------------|----------|
| Location                                                                                                                                                            | Rate per 100,000                   |                                   | % change |
|                                                                                                                                                                     | Before garbage code redistribution | After garbage code redistribution |          |
| Worldwide                                                                                                                                                           | 0.73                               | 0.91                              | 1.25     |
| 1: High Income                                                                                                                                                      | 0.56                               | 0.73                              | 1.30     |
| 2: Eastern Europe/Central Asia                                                                                                                                      | 0.75                               | 0.98                              | 1.30     |
| 3: Sub-Saharan Africa                                                                                                                                               | 8.03                               | 8.25                              | 1.03     |
| 4: North Africa/Middle East                                                                                                                                         | 1.08                               | 1.46                              | 1.35     |
| 5: South Asia                                                                                                                                                       | 3.96                               | 6.92                              | 1.75     |
| 6: East Asia/Pacific                                                                                                                                                | 0.14                               | 0.17                              | 1.26     |
| 7: Latin America/Caribbean                                                                                                                                          | 3.19                               | 3.78                              | 1.19     |
| 1: Asia Pacific, High Income                                                                                                                                        | 0.26                               | 0.32                              | 1.24     |
| 2: Asia, Central                                                                                                                                                    | 2.28                               | 2.80                              | 1.23     |
| 3: Asia, East                                                                                                                                                       | 0.09                               | 0.11                              | 1.18     |
| 4: Asia, South                                                                                                                                                      | 3.96                               | 6.92                              | 1.75     |
| 5: Asia, Southeast                                                                                                                                                  | 3.57                               | 5.10                              | 1.43     |
| 6: Australasia                                                                                                                                                      | 0.23                               | 0.31                              | 1.35     |
| 7: Caribbean                                                                                                                                                        | 1.62                               | 1.84                              | 1.13     |
| 8: Europe, Central                                                                                                                                                  | 0.32                               | 0.43                              | 1.36     |
| 9: Europe, Eastern                                                                                                                                                  | 0.81                               | 1.06                              | 1.31     |
| 10: Europe, Western                                                                                                                                                 | 0.24                               | 0.33                              | 1.38     |
| 11: Latin America, Andean                                                                                                                                           | 2.94                               | 3.95                              | 1.35     |
| 12: Latin America, Central                                                                                                                                          | 3.38                               | 3.84                              | 1.13     |
| 13: Latin America, Southern                                                                                                                                         | 2.64                               | 3.58                              | 1.35     |
| 14: Latin America, Tropical                                                                                                                                         | 3.04                               | 3.89                              | 1.28     |
| 15: North Africa / Middle East                                                                                                                                      | 1.08                               | 1.46                              | 1.35     |
| 16: North America, High Income                                                                                                                                      | 0.99                               | 1.24                              | 1.25     |
| 17: Oceania                                                                                                                                                         | 1.77                               | 4.01                              | 2.25     |
| 20: Sub-Saharan Africa, Southern                                                                                                                                    | 12.55                              | 13.11                             | 1.04     |
| 21: Sub-Saharan Africa, West                                                                                                                                        | 2.96                               | 2.78                              | 0.94     |

Appendix Table 4: Covariates used in CODEm

| <b>Appendix Table 4: Covariates used in CODEm</b>                                   |                  |              |
|-------------------------------------------------------------------------------------|------------------|--------------|
| <b>Covariate</b>                                                                    | <b>Direction</b> | <b>Level</b> |
| Age-specific fertility rate                                                         | 1                | 1            |
| Total fertility rate                                                                | 1                | 1            |
| Age-standardized HIV death rate for females 15-49                                   | 1                | 1            |
| Neonatal death rate                                                                 | 1                | 1            |
| Lag-distributed GDP per capita                                                      | -1               | 3            |
| Proportion of deliveries occurring in facilities                                    | -1               | 1            |
| Proportion of deliveries performed by skilled birth attendants                      | -1               | 1            |
| Coverage of 4 visits of antenatal care                                              | -1               | 2            |
| Malnutrition in children under 5 years (proportion > 2SD below mean weight for age) | 1                | 2            |
| Health system access                                                                | -1               | 2            |

Appendix Table 5: CODEm sub-model performance

| Appendix Table 5: CODEm sub-model performance |            |                    |                                                                                                                                                                                                                 |                         |      |            |      |       |
|-----------------------------------------------|------------|--------------------|-----------------------------------------------------------------------------------------------------------------------------------------------------------------------------------------------------------------|-------------------------|------|------------|------|-------|
| Overall Rank                                  | Model type | Dependent variable | Covariates                                                                                                                                                                                                      | Root Mean Squared Error |      | Trend Test |      | Draws |
|                                               |            |                    |                                                                                                                                                                                                                 | Test 1                  | Rank | Test 1     | Rank |       |
| 1                                             | spacetime  | Logit(CF)          | Education (mean years per capita), Ln(Total fertility rate), Ln(Lag distributed income per capita)                                                                                                              | 0.65304                 | 1    | 0.31163    | 2    | 180   |
| 2                                             | spacetime  | Logit(CF)          | Age-specific fertility rate, Education (mean years per capita), Ln(Total fertility rate), Ln(Lag distributed income per capita)                                                                                 | 0.65317                 | 2    | 0.31168    | 5    | 148   |
| 3                                             | spacetime  | Logit(CF)          | Proportion of deliveries with skilled birth attendants, Education (mean years per capita), Ln(Total fertility rate), Ln(Lag distributed income per capita)                                                      | 0.65559                 | 8    | 0.31174    | 8    | 121   |
| 4                                             | spacetime  | Logit(CF)          | Proportion of pregnancies with in-facility delivery, Education (mean years per capita), Ln(Total fertility rate), Ln(Lag distributed income per capita)                                                         | 0.65573                 | 10   | 0.31174    | 9    | 99    |
| 5                                             | spacetime  | Logit(CF)          | Education (mean years per capita), Ln(Total fertility rate)                                                                                                                                                     | 0.65484                 | 3    | 0.31178    | 17   | 81    |
| 6                                             | spacetime  | Logit(CF)          | Age-specific fertility rate, Proportion of deliveries with skilled birth attendants, Education (mean years per capita), Ln(Total fertility rate), Ln(Lag distributed income per capita)                         | 0.65563                 | 9    | 0.31177    | 13   | 67    |
| 7                                             | spacetime  | Logit(CF)          | Age-specific fertility rate, Proportion of pregnancies with in-facility delivery, Education (mean years per capita), Ln(Total fertility rate), Ln(Lag distributed income per capita)                            | 0.65555                 | 6    | 0.31178    | 16   | 55    |
| 8                                             | spacetime  | Logit(CF)          | Ln(Total fertility rate), Ln(Lag distributed income per capita)                                                                                                                                                 | 0.65711                 | 23   | 0.31161    | 1    | 45    |
| 9                                             | spacetime  | Logit(CF)          | Education (mean years per capita), Ln(Total fertility rate), Proportion of pregnancies with 4 antenatal care visits, Health system access (capped), Ln(Lag distributed income per capita)                       | 0.65687                 | 22   | 0.31166    | 4    | 37    |
| 10                                            | spacetime  | Logit(CF)          | Age-specific fertility rate, Education (mean years per capita), Ln(Total fertility rate), Health system access (capped), Malnutrition (proportion of population >2SD under mean weight for age)                 | 0.65488                 | 4    | 0.31185    | 24   | 30    |
| 11                                            | spacetime  | Logit(CF)          | Age-specific fertility rate, Education (mean years per capita), Ln(Total fertility rate)                                                                                                                        | 0.65508                 | 5    | 0.31183    | 23   | 25    |
| 12                                            | spacetime  | Logit(CF)          | Education (mean years per capita), Ln(Total fertility rate), Health system access (capped), Malnutrition (proportion of population >2SD under mean weight for age)                                              | 0.65557                 | 7    | 0.31183    | 22   | 20    |
| 13                                            | spacetime  | Logit(CF)          | Proportion of pregnancies with in-facility delivery, Education (mean years per capita), Ln(Total fertility rate), Proportion of pregnancies with 4 antenatal care visits, Ln(Lag distributed income per capita) | 0.65711                 | 24   | 0.31174    | 6    | 17    |
| 14                                            | spacetime  | Logit(CF)          | Age-specific fertility rate, Ln(Total fertility rate), Ln(Lag distributed income per capita)                                                                                                                    | 0.65794                 | 29   | 0.31166    | 3    | 14    |

|    |           |           |                                                                                                                                                                                                                                                 |         |    |         |    |    |
|----|-----------|-----------|-------------------------------------------------------------------------------------------------------------------------------------------------------------------------------------------------------------------------------------------------|---------|----|---------|----|----|
| 15 | spacetime | Logit(CF) | Proportion of deliveries with skilled birth attendants, Education (mean years per capita), Ln(Total fertility rate), Proportion of pregnancies with 4 antenatal care visits, Ln(Lag distributed income per capita)                              | 0.65774 | 28 | 0.31174 | 7  | 11 |
| 16 | spacetime | Logit(CF) | Age-specific fertility rate, Proportion of pregnancies with in-facility delivery, Education (mean years per capita), Ln(Total fertility rate), Proportion of pregnancies with 4 antenatal care visits, Ln(Lag distributed income per capita)    | 0.65746 | 26 | 0.31177 | 15 | 9  |
| 17 | spacetime | Logit(CF) | Age-specific fertility rate, Proportion of deliveries with skilled birth attendants, Education (mean years per capita), Ln(Total fertility rate), Proportion of pregnancies with 4 antenatal care visits, Ln(Lag distributed income per capita) | 0.65815 | 30 | 0.31177 | 12 | 7  |
| 18 | spacetime | Logit(CF) | Proportion of deliveries with skilled birth attendants, Education (mean years per capita), Ln(Total fertility rate)                                                                                                                             | 0.65627 | 13 | 0.31193 | 30 | 6  |
| 19 | spacetime | Logit(CF) | Proportion of deliveries with skilled birth attendants, Ln(Total fertility rate), Ln(Lag distributed income per capita)                                                                                                                         | 0.65883 | 32 | 0.31177 | 11 | 5  |
| 20 | spacetime | Logit(CF) | Proportion of pregnancies with in-facility delivery, Ln(Total fertility rate), Ln(Lag distributed income per capita)                                                                                                                            | 0.66006 | 36 | 0.31176 | 10 | 4  |
| 21 | spacetime | Logit(CF) | Age-specific fertility rate, Proportion of deliveries with skilled birth attendants, Education (mean years per capita), Ln(Total fertility rate)                                                                                                | 0.65593 | 11 | 0.31195 | 36 | 3  |
| 22 | spacetime | Logit(CF) | Proportion of pregnancies with in-facility delivery, Education (mean years per capita), Ln(Total fertility rate), Proportion of pregnancies with 4 antenatal care visits                                                                        | 0.65636 | 16 | 0.31193 | 31 | 3  |
| 23 | spacetime | Logit(CF) | Proportion of deliveries with skilled birth attendants, Education (mean years per capita), Ln(Total fertility rate), Proportion of pregnancies with 4 antenatal care visits                                                                     | 0.65654 | 18 | 0.31192 | 29 | 2  |
| 24 | spacetime | Logit(CF) | Proportion of pregnancies with in-facility delivery, Education (mean years per capita), Ln(Total fertility rate)                                                                                                                                | 0.65663 | 15 | 0.31193 | 33 | 2  |
| 25 | spacetime | Logit(CF) | Proportion of pregnancies with in-facility delivery, Proportion of deliveries with skilled birth attendants, Ln(Total fertility rate), Ln(Lag distributed income per capita)                                                                    | 0.65993 | 35 | 0.31177 | 14 | 2  |
| 26 | spacetime | Logit(CF) | Age-specific fertility rate, Proportion of deliveries with skilled birth attendants, Ln(Total fertility rate), Ln(Lag distributed income per capita)                                                                                            | 0.6584  | 31 | 0.31179 | 19 | 1  |
| 27 | spacetime | Logit(CF) | Education (mean years per capita), Ln(Total fertility rate), Proportion of pregnancies with 4 antenatal care visits, Malnutrition (proportion of population >2SD under mean weight for age)                                                     | 0.65733 | 25 | 0.31188 | 26 | 1  |
| 28 | spacetime | Logit(CF) | Age-specific fertility rate, Proportion of pregnancies with in-facility delivery, Ln(Total fertility rate), Ln(Lag distributed income per capita)                                                                                               | 0.65952 | 34 | 0.31179 | 18 | 1  |
| 29 | spacetime | Logit(CF) | Age-specific fertility rate, Proportion of pregnancies with in-facility delivery, Education (mean years per capita), Ln(Total fertility rate)                                                                                                   | 0.65597 | 12 | 0.31196 | 40 | 1  |

|    |           |           |                                                                                                                                                                                                                                               |         |    |         |    |   |
|----|-----------|-----------|-----------------------------------------------------------------------------------------------------------------------------------------------------------------------------------------------------------------------------------------------|---------|----|---------|----|---|
| 30 | spacetime | Logit(CF) | Age-specific fertility rate, Proportion of deliveries with skilled birth attendants, Education (mean years per capita), Ln(Total fertility rate), Malnutrition (proportion of population >2SD under mean weight for age)                      | 0.65627 | 14 | 0.31196 | 39 | 1 |
| 31 | spacetime | Logit(CF) | Proportion of pregnancies with in-facility delivery, Education (mean years per capita), Ln(Total fertility rate), Malnutrition (proportion of population >2SD under mean weight for age)                                                      | 0.6566  | 19 | 0.31194 | 34 | 0 |
| 32 | spacetime | Logit(CF) | Age-specific fertility rate, Proportion of pregnancies with in-facility delivery, Proportion of deliveries with skilled birth attendants, Ln(Total fertility rate), Ln(Lag distributed income per capita)                                     | 0.65946 | 33 | 0.3118  | 20 | 0 |
| 33 | spacetime | Logit(CF) | Proportion of deliveries with skilled birth attendants, Education (mean years per capita), Ln(Total fertility rate), Malnutrition (proportion of population >2SD under mean weight for age)                                                   | 0.6567  | 21 | 0.31193 | 32 | 0 |
| 34 | spacetime | Logit(CF) | Age-specific fertility rate, Education (mean years per capita), Ln(Total fertility rate), Proportion of pregnancies with 4 antenatal care visits, Malnutrition (proportion of population >2SD under mean weight for age)                      | 0.65748 | 27 | 0.3119  | 27 | 0 |
| 35 | spacetime | Logit(CF) | Age-specific fertility rate, Proportion of pregnancies with in-facility delivery, Education (mean years per capita), Ln(Total fertility rate), Proportion of pregnancies with 4 antenatal care visits,                                        | 0.65637 | 17 | 0.31195 | 38 | 0 |
| 36 | spacetime | Logit(CF) | Age-specific fertility rate, Proportion of deliveries with skilled birth attendants, Education (mean years per capita), Ln(Total fertility rate), Proportion of pregnancies with 4 antenatal care visits                                      | 0.65669 | 20 | 0.31195 | 35 | 0 |
| 37 | spacetime | Logit(CF) | Education (mean years per capita), Ln(Total fertility rate), Proportion of pregnancies with 4 antenatal care visits, Health system access (capped)                                                                                            | 0.66028 | 37 | 0.31181 | 21 | 0 |
| 38 | spacetime | Logit(CF) | Ln(Total fertility rate)                                                                                                                                                                                                                      | 0.66293 | 40 | 0.31188 | 25 | 0 |
| 39 | spacetime | Logit(CF) | Age-specific fertility rate, Ln(Total fertility rate)                                                                                                                                                                                         | 0.66313 | 43 | 0.31192 | 28 | 0 |
| 40 | spacetime | Logit(CF) | Ln(Total fertility rate), Proportion of pregnancies with 4 antenatal care visits, Health system access (capped), Malnutrition (proportion of population >2SD under mean weight for age)                                                       | 0.66067 | 39 | 0.31195 | 37 | 0 |
| 41 | spacetime | Logit(CF) | Age-specific fertility rate, Ln(Total fertility rate), Proportion of pregnancies with 4 antenatal care visits, Health system access (capped), Malnutrition (proportion of population >2SD under mean weight for age)                          | 0.66046 | 38 | 0.31197 | 41 | 0 |
| 42 | spacetime | Logit(CF) | Proportion of deliveries with skilled birth attendants, Ln(Total fertility rate), Proportion of pregnancies with 4 antenatal care visits, Malnutrition (proportion of population >2SD under mean weight for age)                              | 0.66294 | 41 | 0.31204 | 43 | 0 |
| 43 | spacetime | Logit(CF) | Age-specific fertility rate, Proportion of deliveries with skilled birth attendants, Ln(Total fertility rate), Proportion of pregnancies with 4 antenatal care visits, Malnutrition (proportion of population >2SD under mean weight for age) | 0.66325 | 45 | 0.31205 | 46 | 0 |



|    |           |           |                                                                                                                                                                                                                                                                                                    |         |    |         |    |   |
|----|-----------|-----------|----------------------------------------------------------------------------------------------------------------------------------------------------------------------------------------------------------------------------------------------------------------------------------------------------|---------|----|---------|----|---|
| 44 | spacetime | Logit(CF) | Proportion of deliveries with skilled birth attendants, Ln(Total fertility rate), Health system access (capped), Malnutrition (proportion of population >2SD under mean weight for age)                                                                                                            | 0.66348 | 47 | 0.31205 | 45 | 0 |
| 45 | spacetime | Logit(CF) | Proportion of pregnancies with in-facility delivery, Ln(Total fertility rate), Health system access (capped), Malnutrition (proportion of population >2SD under mean weight for age)                                                                                                               | 0.66315 | 44 | 0.31206 | 50 | 0 |
| 46 | spacetime | Logit(CF) | Proportion of pregnancies with in-facility delivery, Ln(Total fertility rate), Proportion of pregnancies with 4 antenatal care visits, Malnutrition (proportion of population >2SD under mean weight for age)                                                                                      | 0.66398 | 52 | 0.31204 | 42 | 0 |
| 47 | spacetime | Logit(CF) | Proportion of pregnancies with in-facility delivery, Proportion of deliveries with skilled birth attendants, Ln(Total fertility rate), Proportion of pregnancies with 4 antenatal care visits, Malnutrition (proportion of population >2SD under mean weight for age)                              | 0.66399 | 53 | 0.31204 | 44 | 0 |
| 48 | spacetime | Logit(CF) | Age-specific fertility rate, Proportion of pregnancies with in-facility delivery, Ln(Total fertility rate), Health system access (capped), Malnutrition (proportion of population >2SD under mean weight for age)                                                                                  | 0.66301 | 42 | 0.31207 | 55 | 0 |
| 49 | spacetime | Logit(CF) | Proportion of pregnancies with in-facility delivery, Proportion of deliveries with skilled birth attendants, Ln(Total fertility rate), Health system access (capped), Malnutrition (proportion of population >2SD under mean weight for age)                                                       | 0.66368 | 49 | 0.31206 | 49 | 0 |
| 50 | spacetime | Logit(CF) | Age-specific fertility rate, Proportion of deliveries with skilled birth attendants, Ln(Total fertility rate), Health system access (capped), Malnutrition (proportion of population >2SD under mean weight for age)                                                                               | 0.66341 | 46 | 0.31206 | 52 | 0 |
| 51 | spacetime | Logit(CF) | Proportion of deliveries with skilled birth attendants, Ln(Total fertility rate)                                                                                                                                                                                                                   | 0.66397 | 51 | 0.31206 | 51 | 0 |
| 52 | spacetime | Logit(CF) | Age-specific fertility rate, Proportion of pregnancies with in-facility delivery, Proportion of deliveries with skilled birth attendants, Ln(Total fertility rate), Health system access (capped), Malnutrition (proportion of population >2SD under mean weight for age)                          | 0.66354 | 48 | 0.31207 | 54 | 0 |
| 53 | spacetime | Logit(CF) | Age-specific fertility rate, Proportion of pregnancies with in-facility delivery, Ln(Total fertility rate), Proportion of pregnancies with 4 antenatal care visits, Malnutrition (proportion of population >2SD under mean weight for age)                                                         | 0.66428 | 56 | 0.31205 | 47 | 0 |
| 54 | spacetime | Logit(CF) | Age-specific fertility rate, Proportion of pregnancies with in-facility delivery, Proportion of deliveries with skilled birth attendants, Ln(Total fertility rate), Proportion of pregnancies with 4 antenatal care visits, Malnutrition (proportion of population >2SD under mean weight for age) | 0.6643  | 57 | 0.31205 | 48 | 0 |
| 55 | spacetime | Logit(CF) | Age-specific fertility rate, Proportion of deliveries with skilled birth attendants, Ln(Total fertility rate)                                                                                                                                                                                      | 0.66381 | 50 | 0.31208 | 57 | 0 |
| 56 | spacetime | Logit(CF) | Proportion of pregnancies with in-facility delivery, Proportion of deliveries with skilled birth attendants, Ln(Total fertility rate)                                                                                                                                                              | 0.66427 | 55 | 0.31207 | 53 | 0 |

|    |           |           |                                                                                                                                                                                                                                                                  |         |    |         |    |   |
|----|-----------|-----------|------------------------------------------------------------------------------------------------------------------------------------------------------------------------------------------------------------------------------------------------------------------|---------|----|---------|----|---|
| 57 | spacetime | Logit(CF) | Age-specific fertility rate, Proportion of pregnancies with in-facility delivery, Proportion of deliveries with skilled birth attendants, Ln(Total fertility rate)                                                                                               | 0.66409 | 54 | 0.31208 | 58 | 0 |
| 58 | spacetime | Logit(CF) | Proportion of pregnancies with in-facility delivery, Ln(Total fertility rate)                                                                                                                                                                                    | 0.66473 | 61 | 0.31207 | 56 | 0 |
| 59 | spacetime | Logit(CF) | Age-specific fertility rate, Proportion of pregnancies with in-facility delivery, Ln(Total fertility rate)                                                                                                                                                       | 0.66447 | 59 | 0.31209 | 59 | 0 |
| 60 | spacetime | Logit(CF) | Age-specific fertility rate, Education (mean years per capita), Ln(Lag distributed income per capita)                                                                                                                                                            | 0.66502 | 62 | 0.31216 | 61 | 0 |
| 61 | spacetime | Logit(CF) | Age-specific fertility rate, Proportion of deliveries with skilled birth attendants, Education (mean years per capita), Ln(Lag distributed income per capita)                                                                                                    | 0.66579 | 67 | 0.31218 | 67 | 0 |
| 62 | spacetime | Logit(CF) | Age-specific fertility rate, Proportion of pregnancies with in-facility delivery, Education (mean years per capita), Ln(Lag distributed income per capita)                                                                                                       | 0.66637 | 68 | 0.31219 | 73 | 0 |
| 63 | spacetime | Logit(CF) | Proportion of deliveries with skilled birth attendants, Education (mean years per capita), Ln(Lag distributed income per capita)                                                                                                                                 | 0.67221 | 82 | 0.3122  | 83 | 0 |
| 64 | spacetime | Logit(CF) | Education (mean years per capita)                                                                                                                                                                                                                                | 0.66993 | 73 | 0.31231 | 97 | 0 |
| 65 | spacetime | Logit(CF) | Proportion of deliveries with skilled birth attendants, Education (mean years per capita), Proportion of pregnancies with 4 antenatal care visits, Malnutrition (proportion of population >2SD under mean weight for age), Ln(Lag distributed income per capita) | 0.67335 | 87 | 0.3122  | 84 | 0 |
| 66 | spacetime | Logit(CF) | Education (mean years per capita), Ln(Lag distributed income per capita)                                                                                                                                                                                         | 0.67518 | 91 | 0.3122  | 80 | 0 |
| 67 | spacetime | Logit(CF) | Age-specific fertility rate, Proportion of pregnancies with 4 antenatal care visits, Health system access (capped), Malnutrition (proportion of population >2SD under mean weight for age), Ln(Lag distributed income per capita)                                | 0.67141 | 80 | 0.31229 | 92 | 0 |
| 68 | spacetime | Logit(CF) | Proportion of pregnancies with in-facility delivery, Proportion of deliveries with skilled birth attendants, Education (mean years per capita), Ln(Lag distributed income per capita)                                                                            | 0.67327 | 85 | 0.31221 | 87 | 0 |
| 69 | spacetime | Logit(CF) | Education (mean years per capita), Proportion of pregnancies with 4 antenatal care visits, Health system access (capped), Malnutrition (proportion of population >2SD under mean weight for age), Ln(Lag distributed income per capita)                          | 0.6724  | 83 | 0.31224 | 91 | 0 |
| 70 | spacetime | Logit(CF) | Proportion of pregnancies with in-facility delivery, Education (mean years per capita), Health system access (capped), Ln(Lag distributed income per capita)                                                                                                     | 0.67273 | 84 | 0.31223 | 90 | 0 |
| 71 | spacetime | Logit(CF) | Proportion of deliveries with skilled birth attendants, Education (mean years per capita), Proportion of pregnancies with 4 antenatal care visits, Health system access (capped), Ln(Lag distributed income per capita)                                          | 0.67338 | 89 | 0.31221 | 85 | 0 |
| 72 | spacetime | Logit(CF) | Proportion of pregnancies with in-facility delivery, Education (mean years per capita), Ln(Lag distributed income per capita)                                                                                                                                    | 0.67332 | 86 | 0.31221 | 88 | 0 |

|    |           |           |                                                                                                                                                                                                                                                                                                                       |         |     |         |     |   |
|----|-----------|-----------|-----------------------------------------------------------------------------------------------------------------------------------------------------------------------------------------------------------------------------------------------------------------------------------------------------------------------|---------|-----|---------|-----|---|
| 73 | spacetime | Logit(CF) | Proportion of pregnancies with in-facility delivery, Proportion of deliveries with skilled birth attendants, Education (mean years per capita), Proportion of pregnancies with 4 antenatal care visits, Malnutrition (proportion of population >2SD under mean weight for age), Ln(Lag distributed income per capita) | 0.67342 | 90  | 0.31221 | 86  | 0 |
| 74 | spacetime | Logit(CF) | Proportion of pregnancies with in-facility delivery, Education (mean years per capita), Proportion of pregnancies with 4 antenatal care visits, Malnutrition (proportion of population >2SD under mean weight for age), Ln(Lag distributed income per capita)                                                         | 0.67335 | 88  | 0.31221 | 89  | 0 |
| 75 | spacetime | Logit(CF) | Age-specific fertility rate, Education (mean years per capita)                                                                                                                                                                                                                                                        | 0.66443 | 58  | 0.31237 | 122 | 0 |
| 76 | spacetime | Logit(CF) | Age-specific fertility rate, Education (mean years per capita), Proportion of pregnancies with 4 antenatal care visits, Health system access (capped), Malnutrition (proportion of population >2SD under mean weight for age)                                                                                         | 0.66788 | 69  | 0.31235 | 112 | 0 |
| 77 | spacetime | Logit(CF) | Age-specific fertility rate, Proportion of deliveries with skilled birth attendants, Ln(Lag distributed income per capita)                                                                                                                                                                                            | 0.6763  | 93  | 0.31231 | 95  | 0 |
| 78 | spacetime | Logit(CF) | Age-specific fertility rate, Proportion of pregnancies with in-facility delivery, Proportion of deliveries with skilled birth attendants, Ln(Lag distributed income per capita)                                                                                                                                       | 0.67678 | 94  | 0.31231 | 96  | 0 |
| 79 | spacetime | Logit(CF) | Education (mean years per capita), Proportion of pregnancies with 4 antenatal care visits, Health system access (capped), Malnutrition (proportion of population >2SD under mean weight for age)                                                                                                                      | 0.66928 | 71  | 0.31236 | 119 | 0 |
| 80 | spacetime | Logit(CF) | Age-specific fertility rate, Proportion of deliveries with skilled birth attendants, Education (mean years per capita)                                                                                                                                                                                                | 0.6645  | 60  | 0.31238 | 130 | 0 |
| 81 | spacetime | Logit(CF) | Age-specific fertility rate, Proportion of deliveries with skilled birth attendants, Education (mean years per capita), Proportion of pregnancies with 4 antenatal care visits, Malnutrition (proportion of population >2SD under mean weight for age)                                                                | 0.66515 | 63  | 0.31237 | 128 | 0 |
| 82 | spacetime | Logit(CF) | Proportion of deliveries with skilled birth attendants, Education (mean years per capita)                                                                                                                                                                                                                             | 0.66859 | 70  | 0.31237 | 124 | 0 |
| 83 | spacetime | Logit(CF) | Proportion of deliveries with skilled birth attendants, Education (mean years per capita), Proportion of pregnancies with 4 antenatal care visits, Health system access (capped)                                                                                                                                      | 0.67004 | 76  | 0.31236 | 118 | 0 |
| 84 | spacetime | Logit(CF) | Proportion of deliveries with skilled birth attendants, Education (mean years per capita), Proportion of pregnancies with 4 antenatal care visits, Malnutrition (proportion of population >2SD under mean weight for age)                                                                                             | 0.66934 | 72  | 0.31237 | 127 | 0 |
| 85 | spacetime | Logit(CF) | Age-specific fertility rate, Proportion of pregnancies with in-facility delivery, Ln(Lag distributed income per capita)                                                                                                                                                                                               | 0.67721 | 96  | 0.31233 | 103 | 0 |
| 86 | spacetime | Logit(CF) | Age-specific fertility rate, Ln(Lag distributed income per capita)                                                                                                                                                                                                                                                    | 0.6805  | 102 | 0.31231 | 98  | 0 |

|     |           |           |                                                                                                                                                                                                                                                                                                                   |         |     |         |     |   |
|-----|-----------|-----------|-------------------------------------------------------------------------------------------------------------------------------------------------------------------------------------------------------------------------------------------------------------------------------------------------------------------|---------|-----|---------|-----|---|
| 87  | spacetime | Logit(CF) | Age-specific fertility rate, Proportion of pregnancies with in-facility delivery, Education (mean years per capita), Proportion of pregnancies with 4 antenatal care visits, Malnutrition (proportion of population >2SD under mean weight for age)                                                               | 0.66562 | 66  | 0.31239 | 134 | 0 |
| 88  | spacetime | Logit(CF) | Proportion of deliveries with skilled birth attendants, Proportion of pregnancies with 4 antenatal care visits, Health system access (capped), Malnutrition (proportion of population >2SD under mean weight for age), Ln(Lag distributed income per capita)                                                      | 0.6791  | 99  | 0.31232 | 102 | 0 |
| 89  | spacetime | Logit(CF) | Proportion of pregnancies with in-facility delivery, Proportion of deliveries with skilled birth attendants, Proportion of pregnancies with 4 antenatal care visits, Health system access (capped), Malnutrition (proportion of population >2SD under mean weight for age), Ln(Lag distributed income per capita) | 0.68029 | 101 | 0.31232 | 101 | 0 |
| 90  | spacetime | Logit(CF) | Age-specific fertility rate, Proportion of pregnancies with in-facility delivery, Proportion of deliveries with skilled birth attendants, Education (mean years per capita)                                                                                                                                       | 0.66519 | 65  | 0.3124  | 137 | 0 |
| 91  | spacetime | Logit(CF) | Proportion of pregnancies with in-facility delivery, Proportion of deliveries with skilled birth attendants, Education (mean years per capita)                                                                                                                                                                    | 0.67    | 74  | 0.31238 | 132 | 0 |
| 92  | spacetime | Logit(CF) | Age-specific fertility rate, Proportion of pregnancies with in-facility delivery, Education (mean years per capita)                                                                                                                                                                                               | 0.66518 | 64  | 0.31241 | 143 | 0 |
| 93  | spacetime | Logit(CF) | Proportion of pregnancies with in-facility delivery, Proportion of deliveries with skilled birth attendants, Education (mean years per capita), Proportion of pregnancies with 4 antenatal care visits, Malnutrition (proportion of population >2SD under mean weight for age)                                    | 0.67022 | 77  | 0.31238 | 131 | 0 |
| 94  | spacetime | Logit(CF) | Proportion of pregnancies with in-facility delivery, Proportion of pregnancies with 4 antenatal care visits, Health system access (capped), Malnutrition (proportion of population >2SD under mean weight for age), Ln(Lag distributed income per capita)                                                         | 0.68065 | 104 | 0.31234 | 106 | 0 |
| 95  | spacetime | Logit(CF) | Proportion of pregnancies with in-facility delivery, Education (mean years per capita), Proportion of pregnancies with 4 antenatal care visits, Malnutrition (proportion of population >2SD under mean weight for age)                                                                                            | 0.67022 | 79  | 0.31238 | 133 | 0 |
| 96  | spacetime | Logit(CF) | Proportion of pregnancies with in-facility delivery, Education (mean years per capita), Health system access (capped)                                                                                                                                                                                             | 0.67001 | 75  | 0.3124  | 138 | 0 |
| 97  | spacetime | Logit(CF) | Proportion of pregnancies with in-facility delivery, Education (mean years per capita)                                                                                                                                                                                                                            | 0.67022 | 78  | 0.31239 | 136 | 0 |
| 98  | spacetime | Logit(CF) | Proportion of deliveries with skilled birth attendants, Ln(Lag distributed income per capita)                                                                                                                                                                                                                     | 0.68086 | 105 | 0.31236 | 116 | 0 |
| 99  | spacetime | Logit(CF) | Proportion of pregnancies with in-facility delivery, Proportion of deliveries with skilled birth attendants, Ln(Lag distributed income per capita)                                                                                                                                                                | 0.68256 | 114 | 0.31236 | 120 | 0 |
| 100 | linear    | Logit(CF) | Ln(Total fertility rate), Ln(Lag distributed income per capita)                                                                                                                                                                                                                                                   | 0.70191 | 174 | 0.31216 | 63  | 0 |
| 101 | linear    | Logit(CF) | Age-specific fertility rate, Ln(Total fertility rate), Ln(Lag distributed income per capita)                                                                                                                                                                                                                      | 0.70204 | 175 | 0.31217 | 64  | 0 |

|     |           |           |                                                                                                                                                                                                                                                                                                         |         |     |         |     |   |
|-----|-----------|-----------|---------------------------------------------------------------------------------------------------------------------------------------------------------------------------------------------------------------------------------------------------------------------------------------------------------|---------|-----|---------|-----|---|
| 102 | spacetime | Logit(CF) | Age-specific fertility rate, Proportion of pregnancies with 4 antenatal care visits, Health system access (capped), Malnutrition (proportion of population >2SD under mean weight for age)                                                                                                              | 0.67166 | 81  | 0.31255 | 160 | 0 |
| 103 | linear    | Logit(CF) | Age-specific fertility rate, Proportion of pregnancies with in-facility delivery, Ln(Total fertility rate), Ln(Lag distributed income per capita)                                                                                                                                                       | 0.70215 | 177 | 0.31218 | 68  | 0 |
| 104 | linear    | Logit(CF) | Proportion of pregnancies with in-facility delivery, Ln(Total fertility rate), Ln(Lag distributed income per capita)                                                                                                                                                                                    | 0.70211 | 176 | 0.31218 | 71  | 0 |
| 105 | linear    | Logit(CF) | Age-specific fertility rate, Proportion of deliveries with skilled birth attendants, Ln(Total fertility rate), Ln(Lag distributed income per capita)                                                                                                                                                    | 0.70176 | 173 | 0.31219 | 74  | 0 |
| 106 | spacetime | Logit(CF) | Proportion of pregnancies with in-facility delivery, Ln(Lag distributed income per capita)                                                                                                                                                                                                              | 0.68252 | 112 | 0.31239 | 135 | 0 |
| 107 | linear    | Logit(CF) | Proportion of deliveries with skilled birth attendants, Ln(Total fertility rate), Ln(Lag distributed income per capita)                                                                                                                                                                                 | 0.70167 | 172 | 0.31219 | 76  | 0 |
| 108 | linear    | Logit(CF) | Education (mean years per capita), Ln(Total fertility rate), Ln(Lag distributed income per capita)                                                                                                                                                                                                      | 0.70366 | 189 | 0.31216 | 60  | 0 |
| 109 | linear    | Logit(CF) | Age-specific fertility rate, Proportion of pregnancies with in-facility delivery, Proportion of deliveries with skilled birth attendants, Ln(Total fertility rate), Ln(Lag distributed income per capita)                                                                                               | 0.70228 | 179 | 0.31219 | 72  | 0 |
| 110 | linear    | Logit(CF) | Age-specific fertility rate, Education (mean years per capita), Ln(Total fertility rate), Ln(Lag distributed income per capita)                                                                                                                                                                         | 0.70379 | 190 | 0.31216 | 62  | 0 |
| 111 | linear    | Logit(CF) | Proportion of pregnancies with in-facility delivery, Proportion of deliveries with skilled birth attendants, Ln(Total fertility rate), Ln(Lag distributed income per capita)                                                                                                                            | 0.70222 | 178 | 0.31219 | 75  | 0 |
| 112 | spacetime | Logit(CF) | Age-specific fertility rate, Proportion of deliveries with skilled birth attendants, Proportion of pregnancies with 4 antenatal care visits, Health system access (capped), Malnutrition (proportion of population >2SD under mean weight for age)                                                      | 0.67554 | 92  | 0.31258 | 162 | 0 |
| 113 | spacetime | Logit(CF) | Age-specific fertility rate, Proportion of pregnancies with in-facility delivery, Proportion of deliveries with skilled birth attendants, Proportion of pregnancies with 4 antenatal care visits, Health system access (capped), Malnutrition (proportion of population >2SD under mean weight for age) | 0.67715 | 95  | 0.31258 | 161 | 0 |
| 114 | linear    | Logit(CF) | Proportion of deliveries with skilled birth attendants, Education (mean years per capita), Ln(Total fertility rate), Ln(Lag distributed income per capita)                                                                                                                                              | 0.70354 | 187 | 0.31218 | 70  | 0 |
| 115 | linear    | Logit(CF) | Age-specific fertility rate, Proportion of deliveries with skilled birth attendants, Education (mean years per capita), Ln(Total fertility rate), Ln(Lag distributed income per capita)                                                                                                                 | 0.70362 | 188 | 0.31218 | 69  | 0 |
| 116 | linear    | Logit(CF) | Education (mean years per capita), Ln(Total fertility rate), Proportion of pregnancies with 4 antenatal care visits, Health system access (capped), Ln(Lag distributed income per capita)                                                                                                               | 0.70281 | 181 | 0.31219 | 77  | 0 |
| 117 | linear    | Logit(CF) | Age-specific fertility rate, Proportion of pregnancies with in-facility delivery, Education (mean years per capita), Ln(Total fertility rate), Ln(Lag distributed income per capita)                                                                                                                    | 0.70404 | 194 | 0.31217 | 65  | 0 |

|     |           |           |                                                                                                                                                                                                                                                                            |         |     |         |     |   |
|-----|-----------|-----------|----------------------------------------------------------------------------------------------------------------------------------------------------------------------------------------------------------------------------------------------------------------------------|---------|-----|---------|-----|---|
| 118 | linear    | Logit(CF) | Proportion of pregnancies with in-facility delivery, Education (mean years per capita), Ln(Total fertility rate), Ln(Lag distributed income per capita)                                                                                                                    | 0.704   | 193 | 0.31217 | 66  | 0 |
| 119 | spacetime | Logit(CF) | Age-specific fertility rate, Proportion of pregnancies with in-facility delivery, Proportion of pregnancies with 4 antenatal care visits, Health system access (capped), Malnutrition (proportion of population >2SD under mean weight for age)                            | 0.67724 | 97  | 0.31259 | 165 | 0 |
| 120 | spacetime | Logit(CF) | Age-specific fertility rate, Proportion of deliveries with skilled birth attendants                                                                                                                                                                                        | 0.67803 | 98  | 0.31271 | 167 | 0 |
| 121 | linear    | Logit(CF) | Proportion of deliveries with skilled birth attendants, Education (mean years per capita), Ln(Total fertility rate), Proportion of pregnancies with 4 antenatal care visits, Ln(Lag distributed income per capita)                                                         | 0.70328 | 185 | 0.3122  | 82  | 0 |
| 122 | spacetime | Logit(CF) | Proportion of deliveries with skilled birth attendants, Proportion of pregnancies with 4 antenatal care visits, Health system access (capped), Malnutrition (proportion of population >2SD under mean weight for age)                                                      | 0.68063 | 103 | 0.31259 | 164 | 0 |
| 123 | linear    | Logit(CF) | Age-specific fertility rate, Proportion of deliveries with skilled birth attendants, Education (mean years per capita), Ln(Total fertility rate), Proportion of pregnancies with 4 antenatal care visits, Ln(Lag distributed income per capita)                            | 0.70334 | 186 | 0.3122  | 81  | 0 |
| 124 | spacetime | Logit(CF) | Age-specific fertility rate, Proportion of pregnancies with in-facility delivery, Proportion of deliveries with skilled birth attendants                                                                                                                                   | 0.67918 | 100 | 0.31272 | 168 | 0 |
| 125 | linear    | Logit(CF) | Proportion of pregnancies with in-facility delivery, Education (mean years per capita), Ln(Total fertility rate), Proportion of pregnancies with 4 antenatal care visits, Ln(Lag distributed income per capita)                                                            | 0.70391 | 191 | 0.3122  | 79  | 0 |
| 126 | linear    | Logit(CF) | Age-specific fertility rate, Proportion of pregnancies with in-facility delivery, Education (mean years per capita), Ln(Total fertility rate), Proportion of pregnancies with 4 antenatal care visits, Ln(Lag distributed income per capita)                               | 0.70394 | 192 | 0.3122  | 78  | 0 |
| 127 | spacetime | Logit(CF) | Proportion of pregnancies with in-facility delivery, Proportion of deliveries with skilled birth attendants, Proportion of pregnancies with 4 antenatal care visits, Health system access (capped), Malnutrition (proportion of population >2SD under mean weight for age) | 0.68152 | 108 | 0.31258 | 163 | 0 |
| 128 | spacetime | Logit(CF) | Proportion of pregnancies with in-facility delivery, Proportion of pregnancies with 4 antenatal care visits, Health system access (capped), Malnutrition (proportion of population >2SD under mean weight for age)                                                         | 0.68194 | 110 | 0.3126  | 166 | 0 |
| 129 | spacetime | Logit(CF) | Age-specific fertility rate, Proportion of pregnancies with in-facility delivery                                                                                                                                                                                           | 0.68117 | 107 | 0.3128  | 172 | 0 |
| 130 | spacetime | Logit(CF) | Proportion of deliveries with skilled birth attendants                                                                                                                                                                                                                     | 0.6901  | 128 | 0.31274 | 169 | 0 |
| 131 | spacetime | Logit(CF) | Proportion of pregnancies with in-facility delivery, Proportion of deliveries with skilled birth attendants                                                                                                                                                                | 0.69036 | 129 | 0.31275 | 170 | 0 |
| 132 | spacetime | Logit(CF) | Proportion of pregnancies with in-facility delivery                                                                                                                                                                                                                        | 0.69204 | 134 | 0.31285 | 175 | 0 |
| 133 | spacetime | Logit(CF) | Age-specific fertility rate                                                                                                                                                                                                                                                | 0.69354 | 137 | 0.31288 | 176 | 0 |

|     |           |           |                                                                                                                                                                                                                          |         |     |         |     |   |
|-----|-----------|-----------|--------------------------------------------------------------------------------------------------------------------------------------------------------------------------------------------------------------------------|---------|-----|---------|-----|---|
| 134 | linear    | Logit(CF) | Age-specific fertility rate, Proportion of deliveries with skilled birth attendants, Education (mean years per capita), Ln(Total fertility rate), Proportion of pregnancies with 4 antenatal care visits                 | 0.70636 | 214 | 0.31236 | 115 | 0 |
| 135 | linear    | Logit(CF) | Age-specific fertility rate, Proportion of pregnancies with in-facility delivery, Education (mean years per capita), Ln(Total fertility rate), Proportion of pregnancies with 4 antenatal care visits                    | 0.7066  | 218 | 0.31235 | 113 | 0 |
| 136 | linear    | Logit(CF) | Age-specific fertility rate, Education (mean years per capita), Ln(Total fertility rate), Proportion of pregnancies with 4 antenatal care visits, Malnutrition (proportion of population >2SD under mean weight for age) | 0.70603 | 208 | 0.31237 | 123 | 0 |
| 137 | linear    | Logit(CF) | Education (mean years per capita), Ln(Total fertility rate), Proportion of pregnancies with 4 antenatal care visits, Health system access (capped)                                                                       | 0.70631 | 213 | 0.31236 | 121 | 0 |
| 138 | linear    | Logit(CF) | Proportion of deliveries with skilled birth attendants, Education (mean years per capita), Ln(Total fertility rate), Proportion of pregnancies with 4 antenatal care visits                                              | 0.70651 | 217 | 0.31236 | 117 | 0 |
| 139 | linear    | Logit(CF) | Education (mean years per capita), Ln(Total fertility rate), Proportion of pregnancies with 4 antenatal care visits, Malnutrition (proportion of population >2SD under mean weight for age)                              | 0.70616 | 210 | 0.31237 | 125 | 0 |
| 140 | linear    | Logit(CF) | Proportion of pregnancies with in-facility delivery, Education (mean years per capita), Ln(Total fertility rate), Proportion of pregnancies with 4 antenatal care visits                                                 | 0.7067  | 221 | 0.31235 | 114 | 0 |
| 141 | linear    | Logit(CF) | Ln(Total fertility rate), Proportion of pregnancies with 4 antenatal care visits, Health system access (capped), Malnutrition (proportion of population >2SD under mean weight for age)                                  | 0.70266 | 180 | 0.31245 | 159 | 0 |
| 142 | linear    | Logit(CF) | Age-specific fertility rate, Ln(Total fertility rate), Proportion of pregnancies with 4 antenatal care visits, Health system access (capped), Malnutrition (proportion of population >2SD under mean weight for age)     | 0.70312 | 184 | 0.31245 | 158 | 0 |
| 143 | linear    | Logit(CF) | Education (mean years per capita), Ln(Total fertility rate)                                                                                                                                                              | 0.70919 | 254 | 0.31229 | 93  | 0 |
| 144 | linear    | Logit(CF) | Education (mean years per capita), Ln(Total fertility rate), Health system access (capped), Malnutrition (proportion of population >2SD under mean weight for age)                                                       | 0.70804 | 237 | 0.31235 | 111 | 0 |
| 145 | linear    | Logit(CF) | Proportion of deliveries with skilled birth attendants, Education (mean years per capita), Ln(Total fertility rate)                                                                                                      | 0.70843 | 243 | 0.31233 | 105 | 0 |
| 146 | spacetime | Ln(Rate)  | Proportion of deliveries with skilled birth attendants, Education (mean years per capita), Ln(Total fertility rate), Ln(HIV death rate, females 15-49), Ln(Lag distributed income per capita)                            | 0.68103 | 106 | 0.31383 | 243 | 0 |
| 147 | linear    | Logit(CF) | Age-specific fertility rate, Proportion of deliveries with skilled birth attendants, Education (mean years per capita), Ln(Total fertility rate)                                                                         | 0.70857 | 245 | 0.31233 | 104 | 0 |
| 148 | linear    | Logit(CF) | Proportion of deliveries with skilled birth attendants, Education (mean years per capita), Ln(Total fertility rate), Malnutrition (proportion of population >2SD under mean weight for age)                              | 0.7084  | 241 | 0.31234 | 109 | 0 |

|     |           |           |                                                                                                                                                                                                                                                                                                    |         |     |         |     |   |
|-----|-----------|-----------|----------------------------------------------------------------------------------------------------------------------------------------------------------------------------------------------------------------------------------------------------------------------------------------------------|---------|-----|---------|-----|---|
| 149 | linear    | Logit(CF) | Age-specific fertility rate, Education (mean years per capita), Ln(Total fertility rate), Health system access (capped), Malnutrition (proportion of population >2SD under mean weight for age)                                                                                                    | 0.70824 | 240 | 0.31234 | 110 | 0 |
| 150 | linear    | Logit(CF) | Age-specific fertility rate, Proportion of pregnancies with in-facility delivery, Ln(Total fertility rate), Proportion of pregnancies with 4 antenatal care visits, Malnutrition (proportion of population >2SD under mean weight for age)                                                         | 0.7049  | 198 | 0.31243 | 152 | 0 |
| 151 | linear    | Logit(CF) | Proportion of pregnancies with in-facility delivery, Ln(Total fertility rate), Proportion of pregnancies with 4 antenatal care visits, Malnutrition (proportion of population >2SD under mean weight for age)                                                                                      | 0.70483 | 196 | 0.31243 | 155 | 0 |
| 152 | linear    | Logit(CF) | Age-specific fertility rate, Proportion of deliveries with skilled birth attendants, Education (mean years per capita), Ln(Total fertility rate), Malnutrition (proportion of population >2SD under mean weight for age)                                                                           | 0.7085  | 244 | 0.31234 | 107 | 0 |
| 153 | spacetime | Ln(Rate)  | Proportion of pregnancies with in-facility delivery, Education (mean years per capita), Ln(Total fertility rate), Ln(HIV death rate, females 15-49), Ln(Lag distributed income per capita)                                                                                                         | 0.68249 | 111 | 0.31383 | 242 | 0 |
| 154 | linear    | Logit(CF) | Age-specific fertility rate, Proportion of deliveries with skilled birth attendants, Ln(Total fertility rate), Proportion of pregnancies with 4 antenatal care visits, Malnutrition (proportion of population >2SD under mean weight for age)                                                      | 0.70488 | 197 | 0.31243 | 156 | 0 |
| 155 | linear    | Logit(CF) | Age-specific fertility rate, Proportion of pregnancies with in-facility delivery, Proportion of deliveries with skilled birth attendants, Ln(Total fertility rate), Proportion of pregnancies with 4 antenatal care visits, Malnutrition (proportion of population >2SD under mean weight for age) | 0.7051  | 200 | 0.31243 | 153 | 0 |
| 156 | linear    | Logit(CF) | Age-specific fertility rate, Education (mean years per capita), Ln(Total fertility rate)                                                                                                                                                                                                           | 0.70947 | 260 | 0.31229 | 94  | 0 |
| 157 | linear    | Logit(CF) | Proportion of pregnancies with in-facility delivery, Proportion of deliveries with skilled birth attendants, Ln(Total fertility rate), Proportion of pregnancies with 4 antenatal care visits, Malnutrition (proportion of population >2SD under mean weight for age)                              | 0.70512 | 201 | 0.31243 | 154 | 0 |
| 158 | spacetime | Ln(Rate)  | Proportion of pregnancies with in-facility delivery, Education (mean years per capita), Ln(Total fertility rate), Ln(Lag distributed income per capita)                                                                                                                                            | 0.6894  | 127 | 0.31375 | 228 | 0 |
| 159 | spacetime | Ln(Rate)  | Proportion of deliveries with skilled birth attendants, Education (mean years per capita), Ln(Total fertility rate), Ln(Lag distributed income per capita)                                                                                                                                         | 0.68832 | 126 | 0.31376 | 229 | 0 |
| 160 | spacetime | Ln(Rate)  | Education (mean years per capita), Ln(Total fertility rate), Ln(HIV death rate, females 15-49), Ln(Lag distributed income per capita)                                                                                                                                                              | 0.68302 | 115 | 0.31383 | 240 | 0 |
| 161 | spacetime | Ln(Rate)  | Age-specific fertility rate, Proportion of deliveries with skilled birth attendants, Education (mean years per capita), Ln(Total fertility rate), Ln(HIV death rate, females 15-49), Ln(Lag distributed income per capita)                                                                         | 0.68192 | 109 | 0.31385 | 247 | 0 |



|     |           |           |                                                                                                                                                                                                                                                                                      |         |     |         |     |   |
|-----|-----------|-----------|--------------------------------------------------------------------------------------------------------------------------------------------------------------------------------------------------------------------------------------------------------------------------------------|---------|-----|---------|-----|---|
| 162 | linear    | Logit(CF) | Proportion of deliveries with skilled birth attendants, Ln(Total fertility rate), Proportion of pregnancies with 4 antenatal care visits, Malnutrition (proportion of population >2SD under mean weight for age)                                                                     | 0.70492 | 199 | 0.31244 | 157 | 0 |
| 163 | linear    | Logit(CF) | Proportion of pregnancies with in-facility delivery, Education (mean years per capita), Ln(Total fertility rate)                                                                                                                                                                     | 0.70923 | 257 | 0.31232 | 100 | 0 |
| 164 | linear    | Logit(CF) | Age-specific fertility rate, Proportion of pregnancies with in-facility delivery, Education (mean years per capita), Ln(Total fertility rate)                                                                                                                                        | 0.70934 | 259 | 0.31232 | 99  | 0 |
| 165 | linear    | Logit(CF) | Proportion of pregnancies with in-facility delivery, Education (mean years per capita), Ln(Total fertility rate), Malnutrition (proportion of population >2SD under mean weight for age)                                                                                             | 0.70902 | 250 | 0.31234 | 108 | 0 |
| 166 | spacetime | Ln(Rate)  | Education (mean years per capita), Ln(Total fertility rate), Ln(Lag distributed income per capita)                                                                                                                                                                                   | 0.69049 | 130 | 0.31377 | 230 | 0 |
| 167 | spacetime | Ln(Rate)  | Age-specific fertility rate, Proportion of pregnancies with in-facility delivery, Education (mean years per capita), Ln(Total fertility rate), Ln(HIV death rate, females 15-49), Ln(Lag distributed income per capita)                                                              | 0.68253 | 113 | 0.31385 | 248 | 0 |
| 168 | spacetime | Ln(Rate)  | Proportion of pregnancies with in-facility delivery, Education (mean years per capita), Ln(Total fertility rate), Ln(HIV death rate, females 15-49), Proportion of pregnancies with 4 antenatal care visits, Health system access (capped), Ln(Lag distributed income per capita)    | 0.6844  | 117 | 0.31384 | 245 | 0 |
| 169 | spacetime | Ln(Rate)  | Age-specific fertility rate, Education (mean years per capita), Ln(Total fertility rate), Ln(HIV death rate, females 15-49), Ln(Lag distributed income per capita)                                                                                                                   | 0.6843  | 116 | 0.31384 | 246 | 0 |
| 170 | spacetime | Ln(Rate)  | Age-specific fertility rate, Education (mean years per capita), Ln(Total fertility rate), Ln(Lag distributed income per capita)                                                                                                                                                      | 0.69091 | 131 | 0.31379 | 232 | 0 |
| 171 | spacetime | Ln(Rate)  | Proportion of deliveries with skilled birth attendants, Education (mean years per capita), Ln(Total fertility rate), Ln(HIV death rate, females 15-49), Proportion of pregnancies with 4 antenatal care visits, Health system access (capped), Ln(Lag distributed income per capita) | 0.68476 | 119 | 0.31384 | 244 | 0 |
| 172 | linear    | Logit(CF) | Proportion of deliveries with skilled birth attendants, Ln(Total fertility rate), Health system access (capped), Malnutrition (proportion of population >2SD under mean weight for age)                                                                                              | 0.70662 | 219 | 0.31241 | 146 | 0 |
| 173 | spacetime | Ln(Rate)  | Age-specific fertility rate, Education (mean years per capita), Ln(Total fertility rate), Proportion of pregnancies with 4 antenatal care visits, Health system access (capped), Ln(Lag distributed income per capita)                                                               | 0.69299 | 135 | 0.31378 | 231 | 0 |
| 174 | linear    | Logit(CF) | Age-specific fertility rate, Proportion of deliveries with skilled birth attendants, Ln(Total fertility rate), Health system access (capped), Malnutrition (proportion of population >2SD under mean weight for age)                                                                 | 0.70686 | 223 | 0.31241 | 144 | 0 |
| 175 | linear    | Logit(CF) | Ln(Total fertility rate)                                                                                                                                                                                                                                                             | 0.70807 | 238 | 0.31237 | 129 | 0 |

|     |           |           |                                                                                                                                                                                                                                                                                                                               |         |     |         |     |   |
|-----|-----------|-----------|-------------------------------------------------------------------------------------------------------------------------------------------------------------------------------------------------------------------------------------------------------------------------------------------------------------------------------|---------|-----|---------|-----|---|
| 176 | linear    | Logit(CF) | Proportion of pregnancies with in-facility delivery, Proportion of deliveries with skilled birth attendants, Ln(Total fertility rate), Health system access (capped), Malnutrition (proportion of population >2SD under mean weight for age)                                                                                  | 0.70734 | 227 | 0.3124  | 142 | 0 |
| 177 | linear    | Logit(CF) | Proportion of pregnancies with in-facility delivery, Ln(Total fertility rate), Health system access (capped), Malnutrition (proportion of population >2SD under mean weight for age)                                                                                                                                          | 0.7074  | 228 | 0.3124  | 141 | 0 |
| 178 | spacetime | Ln(Rate)  | Age-specific fertility rate, Proportion of pregnancies with in-facility delivery, Education (mean years per capita), Ln(Total fertility rate), Ln(HIV death rate, females 15-49), Proportion of pregnancies with 4 antenatal care visits, Health system access (capped), Ln(Lag distributed income per capita)                | 0.68468 | 118 | 0.31386 | 252 | 0 |
| 179 | spacetime | Ln(Rate)  | Proportion of deliveries with skilled birth attendants, Education (mean years per capita), Ln(Total fertility rate), Ln(HIV death rate, females 15-49), Proportion of pregnancies with 4 antenatal care visits, Malnutrition (proportion of population >2SD under mean weight for age), Ln(Lag distributed income per capita) | 0.68589 | 122 | 0.31385 | 249 | 0 |
| 180 | linear    | Logit(CF) | Age-specific fertility rate, Proportion of pregnancies with in-facility delivery, Proportion of deliveries with skilled birth attendants, Ln(Total fertility rate), Health system access (capped), Malnutrition (proportion of population >2SD under mean weight for age)                                                     | 0.70754 | 231 | 0.3124  | 140 | 0 |
| 181 | spacetime | Ln(Rate)  | Age-specific fertility rate, Proportion of deliveries with skilled birth attendants, Education (mean years per capita), Ln(Total fertility rate), Ln(HIV death rate, females 15-49), Proportion of pregnancies with 4 antenatal care visits, Health system access (capped), Ln(Lag distributed income per capita)             | 0.68508 | 120 | 0.31386 | 251 | 0 |
| 182 | linear    | Logit(CF) | Age-specific fertility rate, Proportion of pregnancies with in-facility delivery, Ln(Total fertility rate), Health system access (capped), Malnutrition (proportion of population >2SD under mean weight for age)                                                                                                             | 0.7076  | 232 | 0.3124  | 139 | 0 |
| 183 | linear    | Logit(CF) | Age-specific fertility rate, Ln(Total fertility rate)                                                                                                                                                                                                                                                                         | 0.70861 | 246 | 0.31237 | 126 | 0 |
| 184 | linear    | Logit(CF) | Proportion of deliveries with skilled birth attendants, Ln(Total fertility rate)                                                                                                                                                                                                                                              | 0.70678 | 222 | 0.31243 | 151 | 0 |
| 185 | linear    | Logit(CF) | Proportion of pregnancies with in-facility delivery, Proportion of deliveries with skilled birth attendants, Ln(Total fertility rate)                                                                                                                                                                                         | 0.70718 | 226 | 0.31242 | 149 | 0 |
| 186 | spacetime | Ln(Rate)  | Proportion of pregnancies with in-facility delivery, Education (mean years per capita), Ln(Total fertility rate), Ln(HIV death rate, females 15-49), Proportion of pregnancies with 4 antenatal care visits, Malnutrition (proportion of population >2SD under mean weight for age), Ln(Lag distributed income per capita)    | 0.68537 | 121 | 0.31386 | 254 | 0 |
| 187 | linear    | Logit(CF) | Age-specific fertility rate, Proportion of deliveries with skilled birth attendants, Ln(Total fertility rate)                                                                                                                                                                                                                 | 0.70716 | 225 | 0.31242 | 150 | 0 |

|     |           |           |                                                                                                                                                                                                                                                                                                                                                            |         |     |         |     |   |
|-----|-----------|-----------|------------------------------------------------------------------------------------------------------------------------------------------------------------------------------------------------------------------------------------------------------------------------------------------------------------------------------------------------------------|---------|-----|---------|-----|---|
| 188 | linear    | Logit(CF) | Age-specific fertility rate, Proportion of pregnancies with in-facility delivery, Proportion of deliveries with skilled birth attendants, Ln(Total fertility rate)                                                                                                                                                                                         | 0.7075  | 230 | 0.31242 | 148 | 0 |
| 189 | spacetime | Ln(Rate)  | Age-specific fertility rate, Proportion of deliveries with skilled birth attendants, Education (mean years per capita), Ln(Total fertility rate), Ln(HIV death rate, females 15-49), Proportion of pregnancies with 4 antenatal care visits, Malnutrition (proportion of population >2SD under mean weight for age), Ln(Lag distributed income per capita) | 0.68668 | 125 | 0.31386 | 253 | 0 |
| 190 | spacetime | Ln(Rate)  | Education (mean years per capita), Ln(Total fertility rate), Ln(HIV death rate, females 15-49), Proportion of pregnancies with 4 antenatal care visits, Health system access (capped), Malnutrition (proportion of population >2SD under mean weight for age), Ln(Lag distributed income per capita)                                                       | 0.68621 | 123 | 0.31387 | 256 | 0 |
| 191 | linear    | Logit(CF) | Proportion of pregnancies with in-facility delivery, Ln(Total fertility rate)                                                                                                                                                                                                                                                                              | 0.70765 | 233 | 0.31241 | 147 | 0 |
| 192 | linear    | Logit(CF) | Age-specific fertility rate, Proportion of pregnancies with in-facility delivery, Ln(Total fertility rate)                                                                                                                                                                                                                                                 | 0.70798 | 236 | 0.31241 | 145 | 0 |
| 193 | spacetime | Ln(Rate)  | Age-specific fertility rate, Education (mean years per capita), Ln(Total fertility rate), Ln(HIV death rate, females 15-49), Proportion of pregnancies with 4 antenatal care visits, Health system access (capped), Malnutrition (proportion of population >2SD under mean weight for age), Ln(Lag distributed income per capita)                          | 0.68667 | 124 | 0.31388 | 258 | 0 |
| 194 | spacetime | Ln(Rate)  | Age-specific fertility rate, Ln(Total fertility rate), Health system access (capped), Ln(Lag distributed income per capita)                                                                                                                                                                                                                                | 0.69833 | 157 | 0.31382 | 238 | 0 |
| 195 | spacetime | Ln(Rate)  | Proportion of deliveries with skilled birth attendants, Ln(Total fertility rate), Ln(Lag distributed income per capita)                                                                                                                                                                                                                                    | 0.7005  | 162 | 0.31381 | 237 | 0 |
| 196 | spacetime | Ln(Rate)  | Age-specific fertility rate, Proportion of pregnancies with in-facility delivery, Ln(Total fertility rate), Ln(HIV death rate, females 15-49), Health system access (capped), Ln(Lag distributed income per capita)                                                                                                                                        | 0.69326 | 136 | 0.31393 | 264 | 0 |
| 197 | spacetime | Ln(Rate)  | Proportion of pregnancies with in-facility delivery, Ln(Total fertility rate), Ln(Lag distributed income per capita)                                                                                                                                                                                                                                       | 0.70145 | 170 | 0.31379 | 233 | 0 |
| 198 | spacetime | Ln(Rate)  | Proportion of pregnancies with in-facility delivery, Proportion of deliveries with skilled birth attendants, Ln(Total fertility rate), Ln(Lag distributed income per capita)                                                                                                                                                                               | 0.70097 | 165 | 0.31382 | 239 | 0 |
| 199 | spacetime | Ln(Rate)  | Age-specific fertility rate, Ln(Total fertility rate), Ln(HIV death rate, females 15-49), Proportion of pregnancies with 4 antenatal care visits, Health system access (capped), Ln(Lag distributed income per capita)                                                                                                                                     | 0.69472 | 141 | 0.31393 | 263 | 0 |
| 200 | spacetime | Ln(Rate)  | Proportion of pregnancies with in-facility delivery, Proportion of deliveries with skilled birth attendants, Ln(Total fertility rate), Malnutrition (proportion of population >2SD under mean weight for age), Ln(Lag distributed income per capita)                                                                                                       | 0.70097 | 164 | 0.31383 | 241 | 0 |

|     |           |          |                                                                                                                                                                                                                                                                                                                           |         |     |         |     |   |
|-----|-----------|----------|---------------------------------------------------------------------------------------------------------------------------------------------------------------------------------------------------------------------------------------------------------------------------------------------------------------------------|---------|-----|---------|-----|---|
| 201 | spacetime | Ln(Rate) | Ln(Total fertility rate), Ln(HIV death rate, females 15-49), Proportion of pregnancies with 4 antenatal care visits, Health system access (capped), Malnutrition (proportion of population >2SD under mean weight for age), Ln(Lag distributed income per capita)                                                         | 0.69462 | 140 | 0.31395 | 265 | 0 |
| 202 | spacetime | Ln(Rate) | Proportion of deliveries with skilled birth attendants, Ln(Total fertility rate), Ln(HIV death rate, females 15-49), Ln(Lag distributed income per capita)                                                                                                                                                                | 0.69816 | 156 | 0.31389 | 260 | 0 |
| 203 | spacetime | Ln(Rate) | Proportion of pregnancies with in-facility delivery, Ln(Total fertility rate), Ln(HIV death rate, females 15-49), Ln(Lag distributed income per capita)                                                                                                                                                                   | 0.6994  | 159 | 0.31388 | 257 | 0 |
| 204 | spacetime | Ln(Rate) | Proportion of deliveries with skilled birth attendants, Ln(Total fertility rate), Ln(HIV death rate, females 15-49), Proportion of pregnancies with 4 antenatal care visits, Health system access (capped), Malnutrition (proportion of population >2SD under mean weight for age), Ln(Lag distributed income per capita) | 0.69812 | 155 | 0.31392 | 262 | 0 |
| 205 | spacetime | Ln(Rate) | Proportion of pregnancies with in-facility delivery, Proportion of deliveries with skilled birth attendants, Ln(Total fertility rate), Ln(HIV death rate, females 15-49), Ln(Lag distributed income per capita)                                                                                                           | 0.69889 | 158 | 0.31389 | 261 | 0 |
| 206 | spacetime | Ln(Rate) | Age-specific fertility rate, Proportion of pregnancies with in-facility delivery, Ln(Total fertility rate), Ln(HIV death rate, females 15-49), Ln(Lag distributed income per capita)                                                                                                                                      | 0.69976 | 160 | 0.31388 | 259 | 0 |
| 207 | spacetime | Ln(Rate) | Proportion of pregnancies with in-facility delivery, Proportion of deliveries with skilled birth attendants, Ln(Total fertility rate), Ln(HIV death rate, females 15-49), Malnutrition (proportion of population >2SD under mean weight for age), Ln(Lag distributed income per capita)                                   | 0.69791 | 154 | 0.31395 | 266 | 0 |
| 208 | spacetime | Ln(Rate) | Age-specific fertility rate, Proportion of deliveries with skilled birth attendants, Education (mean years per capita), Ln(Total fertility rate), Ln(HIV death rate, females 15-49), Proportion of pregnancies with 4 antenatal care visits, Health system access (capped)                                                | 0.69676 | 146 | 0.31438 | 279 | 0 |
| 209 | spacetime | Ln(Rate) | Proportion of deliveries with skilled birth attendants, Education (mean years per capita), Ln(Total fertility rate), Ln(HIV death rate, females 15-49), Proportion of pregnancies with 4 antenatal care visits, Health system access (capped)                                                                             | 0.69698 | 148 | 0.31437 | 278 | 0 |
| 210 | spacetime | Ln(Rate) | Age-specific fertility rate, Proportion of deliveries with skilled birth attendants, Education (mean years per capita), Ln(Total fertility rate), Ln(HIV death rate, females 15-49)                                                                                                                                       | 0.69677 | 147 | 0.3144  | 284 | 0 |
| 211 | spacetime | Ln(Rate) | Age-specific fertility rate, Proportion of pregnancies with in-facility delivery, Education (mean years per capita), Ln(Total fertility rate), Ln(HIV death rate, females 15-49), Proportion of pregnancies with 4 antenatal care visits, Health system access (capped)                                                   | 0.697   | 149 | 0.31439 | 283 | 0 |

|     |           |          |                                                                                                                                                                                                                                                                                                                     |         |     |         |     |   |
|-----|-----------|----------|---------------------------------------------------------------------------------------------------------------------------------------------------------------------------------------------------------------------------------------------------------------------------------------------------------------------|---------|-----|---------|-----|---|
| 212 | spacetime | Ln(Rate) | Proportion of pregnancies with in-facility delivery, Education (mean years per capita), Ln(Total fertility rate), Ln(HIV death rate, females 15-49), Proportion of pregnancies with 4 antenatal care visits, Health system access (capped)                                                                          | 0.69736 | 152 | 0.31438 | 280 | 0 |
| 213 | spacetime | Ln(Rate) | Proportion of deliveries with skilled birth attendants, Education (mean years per capita), Ln(Total fertility rate), Ln(HIV death rate, females 15-49)                                                                                                                                                              | 0.69711 | 150 | 0.31439 | 282 | 0 |
| 214 | spacetime | Ln(Rate) | Education (mean years per capita), Ln(Total fertility rate), Ln(HIV death rate, females 15-49), Proportion of pregnancies with 4 antenatal care visits, Health system access (capped), Malnutrition (proportion of population >2SD under mean weight for age)                                                       | 0.69152 | 133 | 0.31446 | 302 | 0 |
| 215 | spacetime | Ln(Rate) | Age-specific fertility rate, Ln(Total fertility rate), Ln(HIV death rate, females 15-49), Malnutrition (proportion of population >2SD under mean weight for age), Ln(Lag distributed income per capita)                                                                                                             | 0.70141 | 168 | 0.314   | 267 | 0 |
| 216 | spacetime | Ln(Rate) | Age-specific fertility rate, Education (mean years per capita), Ln(Total fertility rate), Ln(HIV death rate, females 15-49), Proportion of pregnancies with 4 antenatal care visits, Health system access (capped), Malnutrition (proportion of population >2SD under mean weight for age)                          | 0.69122 | 132 | 0.31447 | 303 | 0 |
| 217 | spacetime | Ln(Rate) | Age-specific fertility rate, Proportion of pregnancies with in-facility delivery, Education (mean years per capita), Ln(Total fertility rate), Ln(HIV death rate, females 15-49)                                                                                                                                    | 0.69716 | 151 | 0.31442 | 286 | 0 |
| 218 | spacetime | Ln(Rate) | Proportion of pregnancies with in-facility delivery, Education (mean years per capita), Ln(Total fertility rate), Ln(HIV death rate, females 15-49)                                                                                                                                                                 | 0.69757 | 153 | 0.31441 | 285 | 0 |
| 219 | spacetime | Ln(Rate) | Proportion of deliveries with skilled birth attendants, Education (mean years per capita), Ln(Total fertility rate), Ln(HIV death rate, females 15-49), Proportion of pregnancies with 4 antenatal care visits, Malnutrition (proportion of population >2SD under mean weight for age)                              | 0.69388 | 138 | 0.31446 | 300 | 0 |
| 220 | spacetime | Ln(Rate) | Proportion of deliveries with skilled birth attendants, Education (mean years per capita), Ln(Total fertility rate), Ln(HIV death rate, females 15-49), Health system access (capped), Malnutrition (proportion of population >2SD under mean weight for age)                                                       | 0.69549 | 143 | 0.31444 | 297 | 0 |
| 221 | spacetime | Ln(Rate) | Age-specific fertility rate, Proportion of deliveries with skilled birth attendants, Education (mean years per capita), Ln(Total fertility rate), Ln(HIV death rate, females 15-49), Proportion of pregnancies with 4 antenatal care visits, Malnutrition (proportion of population >2SD under mean weight for age) | 0.69394 | 139 | 0.31446 | 301 | 0 |
| 222 | spacetime | Ln(Rate) | Age-specific fertility rate, Proportion of deliveries with skilled birth attendants, Education (mean years per capita), Ln(Total fertility rate), Ln(HIV death rate, females 15-49), Health system access (capped), Malnutrition (proportion of population >2SD under mean weight for age)                          | 0.69513 | 142 | 0.31445 | 298 | 0 |

|     |           |           |                                                                                                                                                                                                                                                                                                                  |         |     |         |     |   |
|-----|-----------|-----------|------------------------------------------------------------------------------------------------------------------------------------------------------------------------------------------------------------------------------------------------------------------------------------------------------------------|---------|-----|---------|-----|---|
| 223 | spacetime | Ln(Rate)  | Proportion of pregnancies with in-facility delivery, Education (mean years per capita), Ln(Total fertility rate), Ln(HIV death rate, females 15-49), Proportion of pregnancies with 4 antenatal care visits, Malnutrition (proportion of population >2SD under mean weight for age)                              | 0.6963  | 144 | 0.31447 | 304 | 0 |
| 224 | spacetime | Ln(Rate)  | Age-specific fertility rate, Proportion of pregnancies with in-facility delivery, Education (mean years per capita), Ln(Total fertility rate), Ln(HIV death rate, females 15-49), Proportion of pregnancies with 4 antenatal care visits, Malnutrition (proportion of population >2SD under mean weight for age) | 0.69636 | 145 | 0.31447 | 305 | 0 |
| 225 | spacetime | Ln(Rate)  | Age-specific fertility rate, Education (mean years per capita), Ln(Total fertility rate), Ln(HIV death rate, females 15-49)                                                                                                                                                                                      | 0.70144 | 169 | 0.31438 | 281 | 0 |
| 226 | spacetime | Ln(Rate)  | Education (mean years per capita), Ln(Total fertility rate), Ln(HIV death rate, females 15-49)                                                                                                                                                                                                                   | 0.70281 | 182 | 0.31436 | 277 | 0 |
| 227 | spacetime | Ln(Rate)  | Age-specific fertility rate, Proportion of deliveries with skilled birth attendants, Education (mean years per capita), Ln(HIV death rate, females 15-49), Ln(Lag distributed income per capita)                                                                                                                 | 0.70044 | 161 | 0.3145  | 306 | 0 |
| 228 | spacetime | Ln(Rate)  | Age-specific fertility rate, Ln(Total fertility rate), Ln(HIV death rate, females 15-49), Ln(Lag distributed income per capita)                                                                                                                                                                                  | 0.70644 | 215 | 0.31386 | 255 | 0 |
| 229 | spacetime | Ln(Rate)  | Ln(Total fertility rate), Ln(HIV death rate, females 15-49), Ln(Lag distributed income per capita)                                                                                                                                                                                                               | 0.70662 | 220 | 0.31385 | 250 | 0 |
| 230 | linear    | Logit(CF) | Age-specific fertility rate, Proportion of deliveries with skilled birth attendants, Education (mean years per capita), Proportion of pregnancies with 4 antenatal care visits, Malnutrition (proportion of population >2SD under mean weight for age)                                                           | 0.71458 | 284 | 0.31298 | 188 | 0 |
| 231 | spacetime | Ln(Rate)  | Education (mean years per capita), Ln(Total fertility rate), Proportion of pregnancies with 4 antenatal care visits, Health system access (capped), Malnutrition (proportion of population >2SD under mean weight for age)                                                                                       | 0.70521 | 203 | 0.31428 | 269 | 0 |
| 232 | linear    | Logit(CF) | Age-specific fertility rate, Proportion of pregnancies with in-facility delivery, Education (mean years per capita), Proportion of pregnancies with 4 antenatal care visits, Malnutrition (proportion of population >2SD under mean weight for age)                                                              | 0.71438 | 282 | 0.31298 | 190 | 0 |
| 233 | spacetime | Ln(Rate)  | Proportion of deliveries with skilled birth attendants, Education (mean years per capita), Ln(Total fertility rate)                                                                                                                                                                                              | 0.70544 | 204 | 0.31429 | 270 | 0 |
| 234 | spacetime | Ln(Rate)  | Age-specific fertility rate, Proportion of pregnancies with in-facility delivery, Education (mean years per capita), Ln(HIV death rate, females 15-49), Ln(Lag distributed income per capita)                                                                                                                    | 0.70114 | 167 | 0.31451 | 307 | 0 |
| 235 | spacetime | Ln(Rate)  | Proportion of deliveries with skilled birth attendants, Education (mean years per capita), Ln(Total fertility rate), Proportion of pregnancies with 4 antenatal care visits, Malnutrition (proportion of population >2SD under mean weight for age)                                                              | 0.70514 | 202 | 0.31429 | 273 | 0 |

|     |           |           |                                                                                                                                                                                                                                                                                                                                                                 |         |     |         |     |   |
|-----|-----------|-----------|-----------------------------------------------------------------------------------------------------------------------------------------------------------------------------------------------------------------------------------------------------------------------------------------------------------------------------------------------------------------|---------|-----|---------|-----|---|
| 236 | spacetime | Ln(Rate)  | Proportion of pregnancies with in-facility delivery, Education (mean years per capita), Ln(Total fertility rate), Proportion of pregnancies with 4 antenatal care visits, Malnutrition (proportion of population >2SD under mean weight for age)                                                                                                                | 0.70546 | 205 | 0.31429 | 271 | 0 |
| 237 | linear    | Logit(CF) | Age-specific fertility rate, Education (mean years per capita), Proportion of pregnancies with 4 antenatal care visits, Health system access (capped), Malnutrition (proportion of population >2SD under mean weight for age)                                                                                                                                   | 0.71477 | 286 | 0.313   | 192 | 0 |
| 238 | spacetime | Ln(Rate)  | Proportion of pregnancies with in-facility delivery, Education (mean years per capita), Ln(Total fertility rate)                                                                                                                                                                                                                                                | 0.70551 | 206 | 0.31429 | 272 | 0 |
| 239 | spacetime | Ln(Rate)  | Age-specific fertility rate, Proportion of pregnancies with in-facility delivery, Education (mean years per capita), Ln(HIV death rate, females 15-49), Proportion of pregnancies with 4 antenatal care visits, Health system access (capped), Malnutrition (proportion of population >2SD under mean weight for age), Ln(Lag distributed income per capita)    | 0.70098 | 166 | 0.31456 | 316 | 0 |
| 240 | linear    | Logit(CF) | Age-specific fertility rate, Proportion of deliveries with skilled birth attendants, Education (mean years per capita), Ln(Lag distributed income per capita)                                                                                                                                                                                                   | 0.71982 | 308 | 0.31284 | 174 | 0 |
| 241 | linear    | Logit(CF) | Age-specific fertility rate, Proportion of pregnancies with in-facility delivery, Education (mean years per capita), Ln(Lag distributed income per capita)                                                                                                                                                                                                      | 0.72008 | 311 | 0.31284 | 173 | 0 |
| 242 | spacetime | Ln(Rate)  | Age-specific fertility rate, Proportion of deliveries with skilled birth attendants, Education (mean years per capita), Ln(HIV death rate, females 15-49), Proportion of pregnancies with 4 antenatal care visits, Health system access (capped), Malnutrition (proportion of population >2SD under mean weight for age), Ln(Lag distributed income per capita) | 0.70153 | 171 | 0.31455 | 315 | 0 |
| 243 | spacetime | Ln(Rate)  | Age-specific fertility rate, Ln(Total fertility rate), Ln(Lag distributed income per capita)                                                                                                                                                                                                                                                                    | 0.70922 | 256 | 0.31381 | 236 | 0 |
| 244 | spacetime | Ln(Rate)  | Ln(Total fertility rate), Ln(Lag distributed income per capita)                                                                                                                                                                                                                                                                                                 | 0.70931 | 258 | 0.3138  | 234 | 0 |
| 245 | linear    | Logit(CF) | Age-specific fertility rate, Education (mean years per capita), Ln(Lag distributed income per capita)                                                                                                                                                                                                                                                           | 0.72156 | 325 | 0.3128  | 171 | 0 |
| 246 | spacetime | Ln(Rate)  | Age-specific fertility rate, Proportion of deliveries with skilled birth attendants, Education (mean years per capita), Ln(Lag distributed income per capita)                                                                                                                                                                                                   | 0.70581 | 207 | 0.31442 | 289 | 0 |
| 247 | linear    | Logit(CF) | Proportion of pregnancies with in-facility delivery, Education (mean years per capita), Proportion of pregnancies with 4 antenatal care visits, Malnutrition (proportion of population >2SD under mean weight for age)                                                                                                                                          | 0.71837 | 297 | 0.31304 | 200 | 0 |
| 248 | linear    | Logit(CF) | Proportion of deliveries with skilled birth attendants, Education (mean years per capita), Proportion of pregnancies with 4 antenatal care visits, Malnutrition (proportion of population >2SD under mean weight for age)                                                                                                                                       | 0.71851 | 300 | 0.31304 | 198 | 0 |
| 249 | linear    | Logit(CF) | Age-specific fertility rate, Proportion of pregnancies with in-facility delivery, Proportion of deliveries with skilled birth attendants, Education (mean years per capita)                                                                                                                                                                                     | 0.72044 | 315 | 0.31294 | 184 | 0 |

|     |           |           |                                                                                                                                                                                                                                                                                                         |         |     |         |     |   |
|-----|-----------|-----------|---------------------------------------------------------------------------------------------------------------------------------------------------------------------------------------------------------------------------------------------------------------------------------------------------------|---------|-----|---------|-----|---|
| 250 | linear    | Logit(CF) | Age-specific fertility rate, Proportion of deliveries with skilled birth attendants, Education (mean years per capita)                                                                                                                                                                                  | 0.72055 | 317 | 0.31294 | 183 | 0 |
| 251 | spacetime | Ln(Rate)  | Age-specific fertility rate, Proportion of pregnancies with in-facility delivery, Education (mean years per capita), Ln(Lag distributed income per capita)                                                                                                                                              | 0.70624 | 211 | 0.31442 | 290 | 0 |
| 252 | linear    | Logit(CF) | Proportion of pregnancies with in-facility delivery, Proportion of deliveries with skilled birth attendants, Education (mean years per capita), Proportion of pregnancies with 4 antenatal care visits, Malnutrition (proportion of population >2SD under mean weight for age)                          | 0.71866 | 302 | 0.31304 | 199 | 0 |
| 253 | linear    | Logit(CF) | Education (mean years per capita), Proportion of pregnancies with 4 antenatal care visits, Health system access (capped), Malnutrition (proportion of population >2SD under mean weight for age)                                                                                                        | 0.7185  | 299 | 0.31307 | 203 | 0 |
| 254 | spacetime | Ln(Rate)  | Age-specific fertility rate, Education (mean years per capita), Ln(Total fertility rate), Proportion of pregnancies with 4 antenatal care visits, Health system access (capped)                                                                                                                         | 0.70743 | 229 | 0.31431 | 275 | 0 |
| 255 | linear    | Logit(CF) | Age-specific fertility rate, Proportion of pregnancies with in-facility delivery, Education (mean years per capita)                                                                                                                                                                                     | 0.72163 | 326 | 0.31294 | 180 | 0 |
| 256 | spacetime | Ln(Rate)  | Age-specific fertility rate, Proportion of pregnancies with in-facility delivery, Education (mean years per capita), Proportion of pregnancies with 4 antenatal care visits, Health system access (capped), Ln(Lag distributed income per capita)                                                       | 0.70645 | 216 | 0.31444 | 294 | 0 |
| 257 | linear    | Logit(CF) | Age-specific fertility rate, Proportion of pregnancies with 4 antenatal care visits, Health system access (capped), Malnutrition (proportion of population >2SD under mean weight for age), Ln(Lag distributed income per capita)                                                                       | 0.71952 | 306 | 0.3131  | 206 | 0 |
| 258 | linear    | Logit(CF) | Proportion of deliveries with skilled birth attendants, Education (mean years per capita), Proportion of pregnancies with 4 antenatal care visits, Health system access (capped)                                                                                                                        | 0.72052 | 316 | 0.31307 | 202 | 0 |
| 259 | linear    | Logit(CF) | Age-specific fertility rate, Proportion of pregnancies with in-facility delivery, Proportion of deliveries with skilled birth attendants, Proportion of pregnancies with 4 antenatal care visits, Health system access (capped), Malnutrition (proportion of population >2SD under mean weight for age) | 0.71979 | 307 | 0.31328 | 212 | 0 |
| 260 | linear    | Logit(CF) | Age-specific fertility rate, Proportion of pregnancies with 4 antenatal care visits, Health system access (capped), Malnutrition (proportion of population >2SD under mean weight for age)                                                                                                              | 0.71944 | 305 | 0.31329 | 215 | 0 |
| 261 | spacetime | Ln(Rate)  | Age-specific fertility rate, Proportion of pregnancies with in-facility delivery, Proportion of deliveries with skilled birth attendants, Education (mean years per capita), Ln(Lag distributed income per capita)                                                                                      | 0.7077  | 234 | 0.31442 | 287 | 0 |
| 262 | linear    | Logit(CF) | Age-specific fertility rate, Proportion of pregnancies with in-facility delivery, Proportion of pregnancies with 4 antenatal care visits, Health system access (capped), Malnutrition (proportion of population >2SD under mean weight for age)                                                         | 0.71983 | 309 | 0.31328 | 213 | 0 |



|     |           |           |                                                                                                                                                                                                                                                                                                                                    |         |     |         |     |   |
|-----|-----------|-----------|------------------------------------------------------------------------------------------------------------------------------------------------------------------------------------------------------------------------------------------------------------------------------------------------------------------------------------|---------|-----|---------|-----|---|
| 263 | linear    | Logit(CF) | Proportion of deliveries with skilled birth attendants, Education (mean years per capita), Ln(Lag distributed income per capita)                                                                                                                                                                                                   | 0.72393 | 341 | 0.31294 | 181 | 0 |
| 264 | spacetime | Ln(Rate)  | Age-specific fertility rate, Education (mean years per capita), Ln(Total fertility rate), Health system access (capped), Malnutrition (proportion of population >2SD under mean weight for age)                                                                                                                                    | 0.70921 | 255 | 0.31425 | 268 | 0 |
| 265 | linear    | Logit(CF) | Education (mean years per capita), Proportion of pregnancies with 4 antenatal care visits, Health system access (capped), Malnutrition (proportion of population >2SD under mean weight for age), Ln(Lag distributed income per capita)                                                                                            | 0.72187 | 329 | 0.31303 | 197 | 0 |
| 266 | linear    | Logit(CF) | Age-specific fertility rate, Proportion of deliveries with skilled birth attendants, Proportion of pregnancies with 4 antenatal care visits, Health system access (capped), Malnutrition (proportion of population >2SD under mean weight for age)                                                                                 | 0.72008 | 312 | 0.31329 | 214 | 0 |
| 267 | linear    | Logit(CF) | Proportion of pregnancies with in-facility delivery, Education (mean years per capita), Proportion of pregnancies with 4 antenatal care visits, Malnutrition (proportion of population >2SD under mean weight for age), Ln(Lag distributed income per capita)                                                                      | 0.72358 | 337 | 0.31299 | 191 | 0 |
| 268 | linear    | Logit(CF) | Proportion of pregnancies with in-facility delivery, Proportion of deliveries with skilled birth attendants, Education (mean years per capita), Ln(Lag distributed income per capita)                                                                                                                                              | 0.72414 | 348 | 0.31294 | 182 | 0 |
| 269 | linear    | Logit(CF) | Proportion of deliveries with skilled birth attendants, Education (mean years per capita), Proportion of pregnancies with 4 antenatal care visits, Malnutrition (proportion of population >2SD under mean weight for age), Ln(Lag distributed income per capita)                                                                   | 0.72408 | 346 | 0.31297 | 185 | 0 |
| 270 | linear    | Logit(CF) | Proportion of deliveries with skilled birth attendants, Education (mean years per capita), Proportion of pregnancies with 4 antenatal care visits, Health system access (capped), Ln(Lag distributed income per capita)                                                                                                            | 0.72361 | 338 | 0.313   | 193 | 0 |
| 271 | linear    | Logit(CF) | Proportion of pregnancies with in-facility delivery, Proportion of deliveries with skilled birth attendants, Education (mean years per capita), Proportion of pregnancies with 4 antenatal care visits, Malnutrition (proportion of population >2SD under mean weight for age), Ln(Lag distributed income per capita)              | 0.72409 | 347 | 0.31297 | 186 | 0 |
| 272 | linear    | Logit(CF) | Proportion of pregnancies with in-facility delivery, Education (mean years per capita), Ln(Lag distributed income per capita)                                                                                                                                                                                                      | 0.72523 | 358 | 0.31293 | 179 | 0 |
| 273 | spacetime | Ln(Rate)  | Proportion of deliveries with skilled birth attendants, Education (mean years per capita), Ln(HIV death rate, females 15-49), Proportion of pregnancies with 4 antenatal care visits, Health system access (capped), Malnutrition (proportion of population >2SD under mean weight for age), Ln(Lag distributed income per capita) | 0.70615 | 209 | 0.3146  | 329 | 0 |

|     |           |           |                                                                                                                                                                                                                                                                                                         |         |     |         |     |   |
|-----|-----------|-----------|---------------------------------------------------------------------------------------------------------------------------------------------------------------------------------------------------------------------------------------------------------------------------------------------------------|---------|-----|---------|-----|---|
| 274 | spacetime | Ln(Rate)  | Age-specific fertility rate, Education (mean years per capita), Ln(HIV death rate, females 15-49), Proportion of pregnancies with 4 antenatal care visits, Health system access (capped), Malnutrition (proportion of population >2SD under mean weight for age), Ln(Lag distributed income per capita) | 0.70476 | 195 | 0.31463 | 344 | 0 |
| 275 | linear    | Logit(CF) | Proportion of pregnancies with in-facility delivery, Education (mean years per capita), Health system access (capped), Ln(Lag distributed income per capita)                                                                                                                                            | 0.72475 | 353 | 0.31298 | 187 | 0 |
| 276 | linear    | Logit(CF) | Age-specific fertility rate, Proportion of deliveries with skilled birth attendants, Ln(Lag distributed income per capita)                                                                                                                                                                              | 0.72402 | 343 | 0.3131  | 205 | 0 |
| 277 | spacetime | Ln(Rate)  | Proportion of deliveries with skilled birth attendants, Ln(Total fertility rate), Proportion of pregnancies with 4 antenatal care visits, Health system access (capped), Malnutrition (proportion of population >2SD under mean weight for age)                                                         | 0.70795 | 235 | 0.31454 | 314 | 0 |
| 278 | spacetime | Ln(Rate)  | Proportion of pregnancies with in-facility delivery, Ln(Total fertility rate), Proportion of pregnancies with 4 antenatal care visits, Health system access (capped), Malnutrition (proportion of population >2SD under mean weight for age)                                                            | 0.70843 | 242 | 0.31453 | 312 | 0 |
| 279 | spacetime | Ln(Rate)  | Education (mean years per capita), Ln(Total fertility rate)                                                                                                                                                                                                                                             | 0.71408 | 281 | 0.3143  | 274 | 0 |
| 280 | spacetime | Ln(Rate)  | Age-specific fertility rate, Education (mean years per capita), Ln(Total fertility rate)                                                                                                                                                                                                                | 0.71391 | 280 | 0.31431 | 276 | 0 |
| 281 | spacetime | Ln(Rate)  | Proportion of pregnancies with in-facility delivery, Proportion of deliveries with skilled birth attendants, Education (mean years per capita), Health system access (capped), Malnutrition (proportion of population >2SD under mean weight for age), Ln(Lag distributed income per capita)            | 0.71106 | 264 | 0.31443 | 293 | 0 |
| 282 | spacetime | Ln(Rate)  | Proportion of deliveries with skilled birth attendants, Education (mean years per capita), Ln(Lag distributed income per capita)                                                                                                                                                                        | 0.71088 | 266 | 0.31443 | 292 | 0 |
| 283 | linear    | Logit(CF) | Proportion of deliveries with skilled birth attendants, Education (mean years per capita)                                                                                                                                                                                                               | 0.7261  | 364 | 0.31301 | 195 | 0 |
| 284 | spacetime | Ln(Rate)  | Proportion of deliveries with skilled birth attendants, Education (mean years per capita), Ln(HIV death rate, females 15-49), Ln(Lag distributed income per capita)                                                                                                                                     | 0.70907 | 251 | 0.31451 | 309 | 0 |
| 285 | linear    | Logit(CF) | Proportion of pregnancies with in-facility delivery, Proportion of deliveries with skilled birth attendants, Education (mean years per capita)                                                                                                                                                          | 0.72612 | 365 | 0.31301 | 196 | 0 |
| 286 | linear    | Logit(CF) | Proportion of pregnancies with in-facility delivery, Proportion of deliveries with skilled birth attendants, Proportion of pregnancies with 4 antenatal care visits, Health system access (capped), Malnutrition (proportion of population >2SD under mean weight for age)                              | 0.72402 | 342 | 0.31338 | 221 | 0 |
| 287 | spacetime | Ln(Rate)  | Proportion of deliveries with skilled birth attendants, Education (mean years per capita), Proportion of pregnancies with 4 antenatal care visits, Health system access (capped), Malnutrition (proportion of population >2SD under mean weight for age), Ln(Lag distributed income per capita)         | 0.71133 | 268 | 0.31444 | 295 | 0 |

|     |           |           |                                                                                                                                                                                                                                                                                                                                 |         |     |         |     |   |
|-----|-----------|-----------|---------------------------------------------------------------------------------------------------------------------------------------------------------------------------------------------------------------------------------------------------------------------------------------------------------------------------------|---------|-----|---------|-----|---|
| 288 | linear    | Logit(CF) | Proportion of pregnancies with in-facility delivery, Proportion of pregnancies with 4 antenatal care visits, Health system access (capped), Malnutrition (proportion of population >2SD under mean weight for age)                                                                                                              | 0.72403 | 344 | 0.31338 | 219 | 0 |
| 289 | linear    | Logit(CF) | Age-specific fertility rate, Proportion of pregnancies with in-facility delivery, Proportion of deliveries with skilled birth attendants, Ln(Lag distributed income per capita)                                                                                                                                                 | 0.72524 | 359 | 0.3131  | 204 | 0 |
| 290 | spacetime | Ln(Rate)  | Proportion of pregnancies with in-facility delivery, Education (mean years per capita), Ln(Lag distributed income per capita)                                                                                                                                                                                                   | 0.71312 | 276 | 0.31442 | 288 | 0 |
| 291 | linear    | Logit(CF) | Proportion of deliveries with skilled birth attendants, Proportion of pregnancies with 4 antenatal care visits, Health system access (capped), Malnutrition (proportion of population >2SD under mean weight for age)                                                                                                           | 0.72404 | 345 | 0.31338 | 220 | 0 |
| 292 | spacetime | Ln(Rate)  | Age-specific fertility rate, Education (mean years per capita), Proportion of pregnancies with 4 antenatal care visits, Health system access (capped), Malnutrition (proportion of population >2SD under mean weight for age), Ln(Lag distributed income per capita)                                                            | 0.70909 | 252 | 0.31454 | 313 | 0 |
| 293 | spacetime | Ln(Rate)  | Proportion of pregnancies with in-facility delivery, Education (mean years per capita), Ln(HIV death rate, females 15-49), Proportion of pregnancies with 4 antenatal care visits, Health system access (capped), Malnutrition (proportion of population >2SD under mean weight for age), Ln(Lag distributed income per capita) | 0.70708 | 224 | 0.31462 | 341 | 0 |
| 294 | spacetime | Ln(Rate)  | Proportion of pregnancies with in-facility delivery, Proportion of deliveries with skilled birth attendants, Education (mean years per capita), Proportion of pregnancies with 4 antenatal care visits, Health system access (capped), Ln(Lag distributed income per capita)                                                    | 0.71157 | 269 | 0.31444 | 296 | 0 |
| 295 | linear    | Logit(CF) | Age-specific fertility rate, Proportion of pregnancies with in-facility delivery, Ln(Lag distributed income per capita)                                                                                                                                                                                                         | 0.72513 | 357 | 0.31311 | 208 | 0 |
| 296 | linear    | Logit(CF) | Proportion of pregnancies with in-facility delivery, Education (mean years per capita)                                                                                                                                                                                                                                          | 0.72786 | 375 | 0.313   | 194 | 0 |
| 297 | spacetime | Ln(Rate)  | Proportion of pregnancies with in-facility delivery, Proportion of deliveries with skilled birth attendants, Education (mean years per capita), Ln(Lag distributed income per capita)                                                                                                                                           | 0.71368 | 278 | 0.31442 | 291 | 0 |
| 298 | spacetime | Ln(Rate)  | Proportion of pregnancies with in-facility delivery, Proportion of deliveries with skilled birth attendants, Ln(Total fertility rate), Ln(HIV death rate, females 15-49), Malnutrition (proportion of population >2SD under mean weight for age)                                                                                | 0.70061 | 163 | 0.31484 | 407 | 0 |
| 299 | spacetime | Ln(Rate)  | Proportion of pregnancies with in-facility delivery, Education (mean years per capita), Proportion of pregnancies with 4 antenatal care visits, Health system access (capped), Malnutrition (proportion of population >2SD under mean weight for age), Ln(Lag distributed income per capita)                                    | 0.71216 | 272 | 0.31445 | 299 | 0 |

|     |           |           |                                                                                                                                                                                                                                                                                                                   |         |     |         |     |   |
|-----|-----------|-----------|-------------------------------------------------------------------------------------------------------------------------------------------------------------------------------------------------------------------------------------------------------------------------------------------------------------------|---------|-----|---------|-----|---|
| 300 | spacetime | Ln(Rate)  | Proportion of pregnancies with in-facility delivery, Proportion of deliveries with skilled birth attendants, Education (mean years per capita), Ln(HIV death rate, females 15-49), Proportion of pregnancies with 4 antenatal care visits, Health system access (capped), Ln(Lag distributed income per capita)   | 0.70912 | 253 | 0.31457 | 318 | 0 |
| 301 | spacetime | Ln(Rate)  | Proportion of pregnancies with in-facility delivery, Proportion of deliveries with skilled birth attendants, Education (mean years per capita), Ln(HIV death rate, females 15-49), Ln(Lag distributed income per capita)                                                                                          | 0.7105  | 263 | 0.31451 | 308 | 0 |
| 302 | linear    | Logit(CF) | Proportion of pregnancies with in-facility delivery, Education (mean years per capita), Health system access (capped)                                                                                                                                                                                             | 0.72748 | 371 | 0.31305 | 201 | 0 |
| 303 | spacetime | Ln(Rate)  | Ln(Total fertility rate), Proportion of pregnancies with 4 antenatal care visits, Health system access (capped), Malnutrition (proportion of population >2SD under mean weight for age)                                                                                                                           | 0.71045 | 262 | 0.31452 | 311 | 0 |
| 304 | spacetime | Ln(Rate)  | Age-specific fertility rate, Ln(Total fertility rate), Ln(HIV death rate, females 15-49), Proportion of pregnancies with 4 antenatal care visits, Health system access (capped)                                                                                                                                   | 0.70628 | 212 | 0.31469 | 363 | 0 |
| 305 | spacetime | Ln(Rate)  | Proportion of pregnancies with in-facility delivery, Education (mean years per capita), Ln(HIV death rate, females 15-49), Ln(Lag distributed income per capita)                                                                                                                                                  | 0.71088 | 267 | 0.31452 | 310 | 0 |
| 306 | linear    | Logit(CF) | Age-specific fertility rate, Education (mean years per capita)                                                                                                                                                                                                                                                    | 0.73082 | 401 | 0.3129  | 177 | 0 |
| 307 | spacetime | Ln(Rate)  | Proportion of pregnancies with in-facility delivery, Proportion of deliveries with skilled birth attendants, Ln(Total fertility rate), Malnutrition (proportion of population >2SD under mean weight for age)                                                                                                     | 0.71018 | 261 | 0.31458 | 320 | 0 |
| 308 | spacetime | Ln(Rate)  | Age-specific fertility rate, Education (mean years per capita), Ln(HIV death rate, females 15-49), Ln(Lag distributed income per capita)                                                                                                                                                                          | 0.70811 | 239 | 0.31464 | 346 | 0 |
| 309 | linear    | Logit(CF) | Proportion of pregnancies with in-facility delivery, Proportion of pregnancies with 4 antenatal care visits, Health system access (capped), Malnutrition (proportion of population >2SD under mean weight for age), Ln(Lag distributed income per capita)                                                         | 0.72828 | 378 | 0.31327 | 211 | 0 |
| 310 | linear    | Logit(CF) | Proportion of deliveries with skilled birth attendants, Proportion of pregnancies with 4 antenatal care visits, Health system access (capped), Malnutrition (proportion of population >2SD under mean weight for age), Ln(Lag distributed income per capita)                                                      | 0.72934 | 382 | 0.31326 | 209 | 0 |
| 311 | linear    | Logit(CF) | Proportion of pregnancies with in-facility delivery, Proportion of deliveries with skilled birth attendants, Proportion of pregnancies with 4 antenatal care visits, Health system access (capped), Malnutrition (proportion of population >2SD under mean weight for age), Ln(Lag distributed income per capita) | 0.72937 | 383 | 0.31326 | 210 | 0 |
| 312 | spacetime | Ln(Rate)  | Education (mean years per capita), Proportion of pregnancies with 4 antenatal care visits, Health system access (capped), Malnutrition (proportion of population >2SD under mean weight for age), Ln(Lag distributed income per capita)                                                                           | 0.71293 | 275 | 0.31458 | 322 | 0 |

|     |           |           |                                                                                                                                                                                                                                                                                        |         |     |         |     |   |
|-----|-----------|-----------|----------------------------------------------------------------------------------------------------------------------------------------------------------------------------------------------------------------------------------------------------------------------------------------|---------|-----|---------|-----|---|
| 313 | spacetime | Ln(Rate)  | Age-specific fertility rate, Ln(Total fertility rate), Ln(HIV death rate, females 15-49), Malnutrition (proportion of population >2SD under mean weight for age)                                                                                                                       | 0.70291 | 183 | 0.3149  | 416 | 0 |
| 314 | linear    | Logit(CF) | Education (mean years per capita), Ln(Lag distributed income per capita)                                                                                                                                                                                                               | 0.73888 | 431 | 0.31292 | 178 | 0 |
| 315 | linear    | Logit(CF) | Proportion of deliveries with skilled birth attendants, Ln(Lag distributed income per capita)                                                                                                                                                                                          | 0.73021 | 395 | 0.3133  | 216 | 0 |
| 316 | linear    | Logit(CF) | Age-specific fertility rate, Ln(Lag distributed income per capita)                                                                                                                                                                                                                     | 0.73178 | 407 | 0.3131  | 207 | 0 |
| 317 | spacetime | Ln(Rate)  | Proportion of deliveries with skilled birth attendants, Ln(Total fertility rate), Ln(HIV death rate, females 15-49), Proportion of pregnancies with 4 antenatal care visits, Health system access (capped), Malnutrition (proportion of population >2SD under mean weight for age)     | 0.70862 | 247 | 0.31473 | 370 | 0 |
| 318 | spacetime | Ln(Rate)  | Proportion of pregnancies with in-facility delivery, Ln(Total fertility rate), Ln(HIV death rate, females 15-49), Proportion of pregnancies with 4 antenatal care visits, Health system access (capped), Malnutrition (proportion of population >2SD under mean weight for age)        | 0.70866 | 248 | 0.31473 | 373 | 0 |
| 319 | linear    | Logit(CF) | Proportion of pregnancies with in-facility delivery, Proportion of deliveries with skilled birth attendants, Ln(Lag distributed income per capita)                                                                                                                                     | 0.73155 | 405 | 0.3133  | 217 | 0 |
| 320 | spacetime | Ln(Rate)  | Age-specific fertility rate, Education (mean years per capita), Ln(Lag distributed income per capita)                                                                                                                                                                                  | 0.71671 | 295 | 0.31459 | 328 | 0 |
| 321 | linear    | Logit(CF) | Proportion of pregnancies with in-facility delivery, Ln(Lag distributed income per capita)                                                                                                                                                                                             | 0.73165 | 406 | 0.31333 | 218 | 0 |
| 322 | linear    | Logit(CF) | Age-specific fertility rate, Proportion of pregnancies with in-facility delivery, Proportion of deliveries with skilled birth attendants                                                                                                                                               | 0.73181 | 408 | 0.31352 | 222 | 0 |
| 323 | spacetime | Ln(Rate)  | Ln(Total fertility rate), Ln(HIV death rate, females 15-49), Proportion of pregnancies with 4 antenatal care visits, Health system access (capped), Malnutrition (proportion of population >2SD under mean weight for age)                                                             | 0.70869 | 249 | 0.31475 | 382 | 0 |
| 324 | linear    | Logit(CF) | Education (mean years per capita)                                                                                                                                                                                                                                                      | 0.74292 | 447 | 0.31298 | 189 | 0 |
| 325 | spacetime | Ln(Rate)  | Education (mean years per capita), Ln(HIV death rate, females 15-49), Proportion of pregnancies with 4 antenatal care visits, Health system access (capped), Malnutrition (proportion of population >2SD under mean weight for age), Ln(Lag distributed income per capita)             | 0.71067 | 265 | 0.31473 | 372 | 0 |
| 326 | linear    | Logit(CF) | Age-specific fertility rate, Proportion of deliveries with skilled birth attendants                                                                                                                                                                                                    | 0.73307 | 414 | 0.31353 | 223 | 0 |
| 327 | spacetime | Ln(Rate)  | Age-specific fertility rate, Proportion of pregnancies with 4 antenatal care visits, Health system access (capped), Malnutrition (proportion of population >2SD under mean weight for age), Ln(Lag distributed income per capita)                                                      | 0.71484 | 288 | 0.31466 | 358 | 0 |
| 328 | spacetime | Ln(Rate)  | Age-specific fertility rate, Proportion of pregnancies with in-facility delivery, Proportion of pregnancies with 4 antenatal care visits, Health system access (capped), Malnutrition (proportion of population >2SD under mean weight for age), Ln(Lag distributed income per capita) | 0.7202  | 314 | 0.31461 | 335 | 0 |

|     |           |           |                                                                                                                                                                                                                                                                                                                              |         |     |         |     |   |
|-----|-----------|-----------|------------------------------------------------------------------------------------------------------------------------------------------------------------------------------------------------------------------------------------------------------------------------------------------------------------------------------|---------|-----|---------|-----|---|
| 329 | linear    | Logit(CF) | Age-specific fertility rate, Proportion of pregnancies with in-facility delivery                                                                                                                                                                                                                                             | 0.73696 | 428 | 0.3136  | 224 | 0 |
| 330 | spacetime | Ln(Rate)  | Proportion of deliveries with skilled birth attendants, Ln(Total fertility rate)                                                                                                                                                                                                                                             | 0.71919 | 304 | 0.31465 | 352 | 0 |
| 331 | linear    | Logit(CF) | Proportion of deliveries with skilled birth attendants                                                                                                                                                                                                                                                                       | 0.74046 | 434 | 0.31369 | 227 | 0 |
| 332 | spacetime | Ln(Rate)  | Proportion of deliveries with skilled birth attendants, Ln(Total fertility rate), Ln(HIV death rate, females 15-49)                                                                                                                                                                                                          | 0.71232 | 274 | 0.31477 | 387 | 0 |
| 333 | spacetime | Ln(Rate)  | Proportion of pregnancies with in-facility delivery, Proportion of deliveries with skilled birth attendants, Ln(Total fertility rate)                                                                                                                                                                                        | 0.7201  | 313 | 0.31465 | 349 | 0 |
| 334 | spacetime | Ln(Rate)  | Age-specific fertility rate, Proportion of deliveries with skilled birth attendants, Ln(HIV death rate, females 15-49), Proportion of pregnancies with 4 antenatal care visits, Health system access (capped), Malnutrition (proportion of population >2SD under mean weight for age), Ln(Lag distributed income per capita) | 0.71635 | 294 | 0.31472 | 368 | 0 |
| 335 | spacetime | Ln(Rate)  | Age-specific fertility rate, Ln(HIV death rate, females 15-49), Proportion of pregnancies with 4 antenatal care visits, Health system access (capped), Malnutrition (proportion of population >2SD under mean weight for age), Ln(Lag distributed income per capita)                                                         | 0.71228 | 273 | 0.31479 | 391 | 0 |
| 336 | linear    | Logit(CF) | Proportion of pregnancies with in-facility delivery, Proportion of deliveries with skilled birth attendants                                                                                                                                                                                                                  | 0.74121 | 439 | 0.31369 | 226 | 0 |
| 337 | spacetime | Ln(Rate)  | Proportion of pregnancies with in-facility delivery, Proportion of deliveries with skilled birth attendants, Ln(Total fertility rate), Ln(HIV death rate, females 15-49)                                                                                                                                                     | 0.71371 | 279 | 0.31477 | 386 | 0 |
| 338 | spacetime | Ln(Rate)  | Age-specific fertility rate, Proportion of pregnancies with in-facility delivery, Ln(HIV death rate, females 15-49), Proportion of pregnancies with 4 antenatal care visits, Health system access (capped), Malnutrition (proportion of population >2SD under mean weight for age), Ln(Lag distributed income per capita)    | 0.71553 | 291 | 0.31475 | 384 | 0 |
| 339 | spacetime | Ln(Rate)  | Proportion of pregnancies with in-facility delivery, Proportion of pregnancies with 4 antenatal care visits, Health system access (capped), Malnutrition (proportion of population >2SD under mean weight for age), Ln(Lag distributed income per capita)                                                                    | 0.72353 | 336 | 0.31464 | 348 | 0 |
| 340 | linear    | Logit(CF) | Proportion of pregnancies with in-facility delivery                                                                                                                                                                                                                                                                          | 0.7455  | 459 | 0.31381 | 235 | 0 |
| 341 | spacetime | Ln(Rate)  | Proportion of deliveries with skilled birth attendants, Proportion of pregnancies with 4 antenatal care visits, Health system access (capped), Malnutrition (proportion of population >2SD under mean weight for age), Ln(Lag distributed income per capita)                                                                 | 0.72525 | 360 | 0.31461 | 334 | 0 |
| 342 | spacetime | Ln(Rate)  | Age-specific fertility rate, Proportion of pregnancies with in-facility delivery, Proportion of deliveries with skilled birth attendants, Malnutrition (proportion of population >2SD under mean weight for age), Ln(Lag distributed income per capita)                                                                      | 0.72369 | 339 | 0.31466 | 355 | 0 |
| 343 | spacetime | Ln(Rate)  | Proportion of pregnancies with in-facility delivery, Ln(Total fertility rate)                                                                                                                                                                                                                                                | 0.72198 | 330 | 0.3147  | 365 | 0 |

|     |           |           |                                                                                                                                                                                                                                                                                                                                   |         |     |         |     |   |
|-----|-----------|-----------|-----------------------------------------------------------------------------------------------------------------------------------------------------------------------------------------------------------------------------------------------------------------------------------------------------------------------------------|---------|-----|---------|-----|---|
| 344 | spacetime | Ln(Rate)  | Age-specific fertility rate, Proportion of pregnancies with in-facility delivery, Ln(Total fertility rate), Ln(HIV death rate, females 15-49), Health system access (capped)                                                                                                                                                      | 0.71531 | 290 | 0.31483 | 406 | 0 |
| 345 | linear    | Logit(CF) | Age-specific fertility rate                                                                                                                                                                                                                                                                                                       | 0.75217 | 477 | 0.31368 | 225 | 0 |
| 346 | spacetime | Ln(Rate)  | Age-specific fertility rate, Proportion of deliveries with skilled birth attendants, Ln(Lag distributed income per capita)                                                                                                                                                                                                        | 0.72482 | 354 | 0.31465 | 350 | 0 |
| 347 | spacetime | Ln(Rate)  | Proportion of pregnancies with in-facility delivery, Ln(Total fertility rate), Ln(HIV death rate, females 15-49)                                                                                                                                                                                                                  | 0.71614 | 293 | 0.31484 | 411 | 0 |
| 348 | spacetime | Ln(Rate)  | Age-specific fertility rate, Proportion of deliveries with skilled birth attendants, Education (mean years per capita), Ln(HIV death rate, females 15-49)                                                                                                                                                                         | 0.71204 | 270 | 0.31505 | 434 | 0 |
| 349 | spacetime | Ln(Rate)  | Age-specific fertility rate, Proportion of pregnancies with in-facility delivery, Ln(Total fertility rate), Ln(HIV death rate, females 15-49)                                                                                                                                                                                     | 0.71601 | 292 | 0.31484 | 413 | 0 |
| 350 | linear    | Ln(Rate)  | Age-specific fertility rate, Education (mean years per capita), Ln(Total fertility rate), Ln(HIV death rate, females 15-49), Proportion of pregnancies with 4 antenatal care visits, Health system access (capped), Malnutrition (proportion of population >2SD under mean weight for age), Ln(Lag distributed income per capita) | 0.72989 | 388 | 0.31458 | 321 | 0 |
| 351 | linear    | Ln(Rate)  | Education (mean years per capita), Ln(Total fertility rate), Ln(HIV death rate, females 15-49), Proportion of pregnancies with 4 antenatal care visits, Health system access (capped), Malnutrition (proportion of population >2SD under mean weight for age), Ln(Lag distributed income per capita)                              | 0.72994 | 389 | 0.31459 | 324 | 0 |
| 352 | spacetime | Ln(Rate)  | Age-specific fertility rate, Proportion of pregnancies with in-facility delivery, Proportion of deliveries with skilled birth attendants, Education (mean years per capita), Ln(HIV death rate, females 15-49), Health system access (capped)                                                                                     | 0.71358 | 277 | 0.31509 | 436 | 0 |
| 353 | spacetime | Ln(Rate)  | Age-specific fertility rate, Education (mean years per capita), Ln(HIV death rate, females 15-49), Proportion of pregnancies with 4 antenatal care visits, Health system access (capped), Malnutrition (proportion of population >2SD under mean weight for age)                                                                  | 0.7121  | 271 | 0.3152  | 444 | 0 |
| 354 | spacetime | Ln(Rate)  | Age-specific fertility rate, Proportion of deliveries with skilled birth attendants, Education (mean years per capita), Proportion of pregnancies with 4 antenatal care visits, Health system access (capped), Malnutrition (proportion of population >2SD under mean weight for age)                                             | 0.71842 | 298 | 0.31492 | 420 | 0 |
| 355 | spacetime | Ln(Rate)  | Age-specific fertility rate, Proportion of pregnancies with in-facility delivery, Proportion of deliveries with skilled birth attendants, Ln(Lag distributed income per capita)                                                                                                                                                   | 0.72585 | 363 | 0.31466 | 357 | 0 |
| 356 | spacetime | Ln(Rate)  | Age-specific fertility rate, Proportion of pregnancies with in-facility delivery, Proportion of deliveries with skilled birth attendants, Education (mean years per capita), Ln(HIV death rate, females 15-49)                                                                                                                    | 0.71462 | 285 | 0.31507 | 435 | 0 |

|     |           |          |                                                                                                                                                                                                                                                                                                                   |         |     |         |     |   |
|-----|-----------|----------|-------------------------------------------------------------------------------------------------------------------------------------------------------------------------------------------------------------------------------------------------------------------------------------------------------------------|---------|-----|---------|-----|---|
| 357 | spacetime | Ln(Rate) | Age-specific fertility rate, Proportion of pregnancies with in-facility delivery, Education (mean years per capita), Proportion of pregnancies with 4 antenatal care visits, Malnutrition (proportion of population >2SD under mean weight for age)                                                               | 0.71874 | 303 | 0.31491 | 418 | 0 |
| 358 | linear    | Ln(Rate) | Education (mean years per capita), Ln(Total fertility rate), Ln(HIV death rate, females 15-49), Ln(Lag distributed income per capita)                                                                                                                                                                             | 0.73151 | 404 | 0.31457 | 317 | 0 |
| 359 | spacetime | Ln(Rate) | Age-specific fertility rate, Proportion of pregnancies with in-facility delivery, Education (mean years per capita), Ln(HIV death rate, females 15-49)                                                                                                                                                            | 0.71453 | 283 | 0.3151  | 438 | 0 |
| 360 | linear    | Ln(Rate) | Age-specific fertility rate, Proportion of deliveries with skilled birth attendants, Education (mean years per capita), Ln(Total fertility rate), Ln(HIV death rate, females 15-49), Proportion of pregnancies with 4 antenatal care visits, Health system access (capped), Ln(Lag distributed income per capita) | 0.7296  | 385 | 0.31462 | 336 | 0 |
| 361 | linear    | Ln(Rate) | Age-specific fertility rate, Education (mean years per capita), Ln(Total fertility rate), Ln(HIV death rate, females 15-49), Ln(Lag distributed income per capita)                                                                                                                                                | 0.73122 | 403 | 0.31457 | 319 | 0 |
| 362 | linear    | Ln(Rate) | Proportion of deliveries with skilled birth attendants, Education (mean years per capita), Ln(Total fertility rate), Ln(HIV death rate, females 15-49), Proportion of pregnancies with 4 antenatal care visits, Health system access (capped), Ln(Lag distributed income per capita)                              | 0.72966 | 386 | 0.31462 | 337 | 0 |
| 363 | spacetime | Ln(Rate) | Age-specific fertility rate, Proportion of deliveries with skilled birth attendants, Education (mean years per capita)                                                                                                                                                                                            | 0.7186  | 301 | 0.31495 | 423 | 0 |
| 364 | linear    | Ln(Rate) | Proportion of pregnancies with in-facility delivery, Education (mean years per capita), Ln(Total fertility rate), Ln(HIV death rate, females 15-49), Ln(Lag distributed income per capita)                                                                                                                        | 0.73051 | 398 | 0.31459 | 326 | 0 |
| 365 | linear    | Ln(Rate) | Proportion of deliveries with skilled birth attendants, Education (mean years per capita), Ln(Total fertility rate), Ln(HIV death rate, females 15-49), Ln(Lag distributed income per capita)                                                                                                                     | 0.73011 | 392 | 0.31461 | 333 | 0 |
| 366 | linear    | Ln(Rate) | Age-specific fertility rate, Proportion of deliveries with skilled birth attendants, Education (mean years per capita), Ln(Total fertility rate), Ln(HIV death rate, females 15-49), Ln(Lag distributed income per capita)                                                                                        | 0.73014 | 393 | 0.31461 | 332 | 0 |
| 367 | linear    | Ln(Rate) | Age-specific fertility rate, Proportion of pregnancies with in-facility delivery, Education (mean years per capita), Ln(Total fertility rate), Ln(HIV death rate, females 15-49), Ln(Lag distributed income per capita)                                                                                           | 0.73057 | 400 | 0.31459 | 327 | 0 |
| 368 | spacetime | Ln(Rate) | Proportion of deliveries with skilled birth attendants, Ln(HIV death rate, females 15-49), Proportion of pregnancies with 4 antenatal care visits, Health system access (capped), Malnutrition (proportion of population >2SD under mean weight for age), Ln(Lag distributed income per capita)                   | 0.72253 | 333 | 0.31479 | 394 | 0 |



|     |           |          |                                                                                                                                                                                                                                                                                                                                                            |         |     |         |     |   |
|-----|-----------|----------|------------------------------------------------------------------------------------------------------------------------------------------------------------------------------------------------------------------------------------------------------------------------------------------------------------------------------------------------------------|---------|-----|---------|-----|---|
| 369 | spacetime | Ln(Rate) | Age-specific fertility rate, Proportion of deliveries with skilled birth attendants, Education (mean years per capita), Ln(HIV death rate, females 15-49), Proportion of pregnancies with 4 antenatal care visits, Health system access (capped), Malnutrition (proportion of population >2SD under mean weight for age)                                   | 0.71481 | 287 | 0.31511 | 440 | 0 |
| 370 | spacetime | Ln(Rate) | Proportion of pregnancies with in-facility delivery, Ln(HIV death rate, females 15-49), Proportion of pregnancies with 4 antenatal care visits, Health system access (capped), Malnutrition (proportion of population >2SD under mean weight for age), Ln(Lag distributed income per capita)                                                               | 0.72095 | 319 | 0.31484 | 409 | 0 |
| 371 | spacetime | Ln(Rate) | Age-specific fertility rate, Proportion of pregnancies with in-facility delivery, Proportion of deliveries with skilled birth attendants, Ln(HIV death rate, females 15-49), Malnutrition (proportion of population >2SD under mean weight for age), Ln(Lag distributed income per capita)                                                                 | 0.72297 | 334 | 0.31479 | 395 | 0 |
| 372 | spacetime | Ln(Rate) | Age-specific fertility rate, Proportion of pregnancies with in-facility delivery, Education (mean years per capita), Ln(HIV death rate, females 15-49), Proportion of pregnancies with 4 antenatal care visits, Health system access (capped), Malnutrition (proportion of population >2SD under mean weight for age)                                      | 0.71523 | 289 | 0.31513 | 441 | 0 |
| 373 | spacetime | Ln(Rate) | Education (mean years per capita), Ln(HIV death rate, females 15-49), Ln(Lag distributed income per capita)                                                                                                                                                                                                                                                | 0.7222  | 331 | 0.3148  | 400 | 0 |
| 374 | spacetime | Ln(Rate) | Age-specific fertility rate, Proportion of deliveries with skilled birth attendants, Ln(HIV death rate, females 15-49), Ln(Lag distributed income per capita)                                                                                                                                                                                              | 0.72499 | 356 | 0.31474 | 375 | 0 |
| 375 | spacetime | Ln(Rate) | Proportion of deliveries with skilled birth attendants, Education (mean years per capita), Ln(HIV death rate, females 15-49)                                                                                                                                                                                                                               | 0.72002 | 310 | 0.31493 | 422 | 0 |
| 376 | linear    | Ln(Rate) | Age-specific fertility rate, Proportion of deliveries with skilled birth attendants, Education (mean years per capita), Ln(Total fertility rate), Ln(HIV death rate, females 15-49), Proportion of pregnancies with 4 antenatal care visits, Malnutrition (proportion of population >2SD under mean weight for age), Ln(Lag distributed income per capita) | 0.73199 | 411 | 0.31458 | 323 | 0 |
| 377 | spacetime | Ln(Rate) | Age-specific fertility rate, Ln(Total fertility rate), Health system access (capped)                                                                                                                                                                                                                                                                       | 0.72772 | 373 | 0.31468 | 361 | 0 |
| 378 | spacetime | Ln(Rate) | Age-specific fertility rate, Proportion of pregnancies with in-facility delivery, Ln(Lag distributed income per capita)                                                                                                                                                                                                                                    | 0.7278  | 374 | 0.31469 | 362 | 0 |
| 379 | linear    | Ln(Rate) | Age-specific fertility rate, Proportion of pregnancies with in-facility delivery, Education (mean years per capita), Ln(Total fertility rate), Ln(HIV death rate, females 15-49), Proportion of pregnancies with 4 antenatal care visits, Health system access (capped), Ln(Lag distributed income per capita)                                             | 0.73018 | 394 | 0.31462 | 343 | 0 |

|     |           |          |                                                                                                                                                                                                                                                                                                                               |         |     |         |     |   |
|-----|-----------|----------|-------------------------------------------------------------------------------------------------------------------------------------------------------------------------------------------------------------------------------------------------------------------------------------------------------------------------------|---------|-----|---------|-----|---|
| 380 | linear    | Ln(Rate) | Proportion of deliveries with skilled birth attendants, Education (mean years per capita), Ln(Total fertility rate), Ln(HIV death rate, females 15-49), Proportion of pregnancies with 4 antenatal care visits, Malnutrition (proportion of population >2SD under mean weight for age), Ln(Lag distributed income per capita) | 0.73199 | 412 | 0.31459 | 325 | 0 |
| 381 | linear    | Ln(Rate) | Proportion of pregnancies with in-facility delivery, Education (mean years per capita), Ln(Total fertility rate), Ln(HIV death rate, females 15-49), Proportion of pregnancies with 4 antenatal care visits, Health system access (capped), Ln(Lag distributed income per capita)                                             | 0.73023 | 396 | 0.31462 | 342 | 0 |
| 382 | linear    | Ln(Rate) | Proportion of pregnancies with in-facility delivery, Education (mean years per capita), Ln(Total fertility rate), Ln(HIV death rate, females 15-49), Proportion of pregnancies with 4 antenatal care visits, Malnutrition (proportion of population >2SD under mean weight for age), Ln(Lag distributed income per capita)    | 0.73194 | 410 | 0.3146  | 330 | 0 |
| 383 | spacetime | Ln(Rate) | Age-specific fertility rate, Proportion of pregnancies with in-facility delivery, Proportion of deliveries with skilled birth attendants, Ln(HIV death rate, females 15-49), Ln(Lag distributed income per capita)                                                                                                            | 0.72637 | 366 | 0.31474 | 376 | 0 |
| 384 | spacetime | Ln(Rate) | Proportion of pregnancies with in-facility delivery, Proportion of deliveries with skilled birth attendants, Education (mean years per capita), Health system access (capped), Malnutrition (proportion of population >2SD under mean weight for age)                                                                         | 0.72452 | 350 | 0.31479 | 392 | 0 |
| 385 | spacetime | Ln(Rate) | Education (mean years per capita), Ln(HIV death rate, females 15-49), Proportion of pregnancies with 4 antenatal care visits, Health system access (capped), Malnutrition (proportion of population >2SD under mean weight for age)                                                                                           | 0.71804 | 296 | 0.31521 | 446 | 0 |
| 386 | spacetime | Ln(Rate) | Ln(HIV death rate, females 15-49), Proportion of pregnancies with 4 antenatal care visits, Health system access (capped), Malnutrition (proportion of population >2SD under mean weight for age), Ln(Lag distributed income per capita)                                                                                       | 0.72185 | 328 | 0.3149  | 417 | 0 |
| 387 | spacetime | Ln(Rate) | Proportion of deliveries with skilled birth attendants, Education (mean years per capita), Proportion of pregnancies with 4 antenatal care visits, Health system access (capped), Malnutrition (proportion of population >2SD under mean weight for age)                                                                      | 0.72304 | 335 | 0.31484 | 410 | 0 |
| 388 | spacetime | Ln(Rate) | Age-specific fertility rate, Proportion of pregnancies with in-facility delivery, Proportion of deliveries with skilled birth attendants, Education (mean years per capita), Proportion of pregnancies with 4 antenatal care visits, Health system access (capped)                                                            | 0.72098 | 320 | 0.31497 | 426 | 0 |
| 389 | spacetime | Ln(Rate) | Proportion of pregnancies with in-facility delivery, Proportion of deliveries with skilled birth attendants, Malnutrition (proportion of population >2SD under mean weight for age), Ln(Lag distributed income per capita)                                                                                                    | 0.72738 | 370 | 0.31474 | 377 | 0 |

|     |           |          |                                                                                                                                                                                                                                                                                                                           |         |     |         |     |   |
|-----|-----------|----------|---------------------------------------------------------------------------------------------------------------------------------------------------------------------------------------------------------------------------------------------------------------------------------------------------------------------------|---------|-----|---------|-----|---|
| 390 | spacetime | Ln(Rate) | Ln(Total fertility rate), Ln(HIV death rate, females 15-49)                                                                                                                                                                                                                                                               | 0.72453 | 351 | 0.3148  | 398 | 0 |
| 391 | spacetime | Ln(Rate) | Age-specific fertility rate, Proportion of pregnancies with in-facility delivery, Education (mean years per capita)                                                                                                                                                                                                       | 0.72113 | 322 | 0.31498 | 427 | 0 |
| 392 | spacetime | Ln(Rate) | Age-specific fertility rate, Proportion of pregnancies with in-facility delivery, Education (mean years per capita), Proportion of pregnancies with 4 antenatal care visits, Health system access (capped)                                                                                                                | 0.72102 | 321 | 0.31499 | 430 | 0 |
| 393 | linear    | Ln(Rate) | Ln(Total fertility rate), Ln(HIV death rate, females 15-49), Proportion of pregnancies with 4 antenatal care visits, Health system access (capped), Malnutrition (proportion of population >2SD under mean weight for age), Ln(Lag distributed income per capita)                                                         | 0.73439 | 421 | 0.31461 | 331 | 0 |
| 394 | spacetime | Ln(Rate) | Age-specific fertility rate, Education (mean years per capita), Proportion of pregnancies with 4 antenatal care visits, Health system access (capped), Malnutrition (proportion of population >2SD under mean weight for age)                                                                                             | 0.72127 | 323 | 0.31499 | 429 | 0 |
| 395 | spacetime | Ln(Rate) | Age-specific fertility rate, Proportion of pregnancies with in-facility delivery, Proportion of deliveries with skilled birth attendants, Education (mean years per capita)                                                                                                                                               | 0.72167 | 327 | 0.31495 | 425 | 0 |
| 396 | linear    | Ln(Rate) | Age-specific fertility rate, Proportion of pregnancies with in-facility delivery, Ln(Total fertility rate), Ln(HIV death rate, females 15-49), Health system access (capped), Ln(Lag distributed income per capita)                                                                                                       | 0.73314 | 415 | 0.31462 | 338 | 0 |
| 397 | spacetime | Ln(Rate) | Age-specific fertility rate, Ln(Total fertility rate), Ln(HIV death rate, females 15-49)                                                                                                                                                                                                                                  | 0.72499 | 355 | 0.3148  | 399 | 0 |
| 398 | spacetime | Ln(Rate) | Proportion of deliveries with skilled birth attendants, Education (mean years per capita)                                                                                                                                                                                                                                 | 0.72467 | 352 | 0.31482 | 403 | 0 |
| 399 | spacetime | Ln(Rate) | Proportion of deliveries with skilled birth attendants, Education (mean years per capita), Ln(HIV death rate, females 15-49), Proportion of pregnancies with 4 antenatal care visits, Health system access (capped), Malnutrition (proportion of population >2SD under mean weight for age)                               | 0.72062 | 318 | 0.31509 | 437 | 0 |
| 400 | linear    | Ln(Rate) | Proportion of deliveries with skilled birth attendants, Ln(Total fertility rate), Ln(HIV death rate, females 15-49), Proportion of pregnancies with 4 antenatal care visits, Health system access (capped), Malnutrition (proportion of population >2SD under mean weight for age), Ln(Lag distributed income per capita) | 0.73316 | 416 | 0.31462 | 339 | 0 |
| 401 | spacetime | Ln(Rate) | Age-specific fertility rate, Ln(Total fertility rate)                                                                                                                                                                                                                                                                     | 0.72986 | 387 | 0.31472 | 369 | 0 |
| 402 | linear    | Ln(Rate) | Age-specific fertility rate, Ln(Total fertility rate), Ln(HIV death rate, females 15-49), Proportion of pregnancies with 4 antenatal care visits, Health system access (capped), Ln(Lag distributed income per capita)                                                                                                    | 0.73328 | 417 | 0.31462 | 340 | 0 |
| 403 | spacetime | Ln(Rate) | Ln(Total fertility rate)                                                                                                                                                                                                                                                                                                  | 0.73009 | 391 | 0.31472 | 367 | 0 |
| 404 | spacetime | Ln(Rate) | Proportion of deliveries with skilled birth attendants, Ln(Lag distributed income per capita)                                                                                                                                                                                                                             | 0.72998 | 390 | 0.31473 | 371 | 0 |

|     |           |          |                                                                                                                                                                                                                                                                                          |         |     |         |     |   |
|-----|-----------|----------|------------------------------------------------------------------------------------------------------------------------------------------------------------------------------------------------------------------------------------------------------------------------------------------|---------|-----|---------|-----|---|
| 405 | spacetime | Ln(Rate) | Proportion of pregnancies with in-facility delivery, Proportion of deliveries with skilled birth attendants, Education (mean years per capita), Ln(HIV death rate, females 15-49), Proportion of pregnancies with 4 antenatal care visits, Health system access (capped)                 | 0.72223 | 332 | 0.315   | 431 | 0 |
| 406 | spacetime | Ln(Rate) | Proportion of pregnancies with in-facility delivery, Education (mean years per capita), Ln(HIV death rate, females 15-49), Proportion of pregnancies with 4 antenatal care visits, Health system access (capped), Malnutrition (proportion of population >2SD under mean weight for age) | 0.7213  | 324 | 0.31511 | 439 | 0 |
| 407 | spacetime | Ln(Rate) | Age-specific fertility rate, Proportion of pregnancies with in-facility delivery, Ln(HIV death rate, females 15-49), Ln(Lag distributed income per capita)                                                                                                                               | 0.72851 | 379 | 0.31478 | 390 | 0 |
| 408 | spacetime | Ln(Rate) | Proportion of pregnancies with in-facility delivery, Education (mean years per capita), Proportion of pregnancies with 4 antenatal care visits, Health system access (capped), Malnutrition (proportion of population >2SD under mean weight for age)                                    | 0.72544 | 361 | 0.31484 | 408 | 0 |
| 409 | spacetime | Ln(Rate) | Education (mean years per capita), Ln(Lag distributed income per capita)                                                                                                                                                                                                                 | 0.72948 | 384 | 0.31476 | 385 | 0 |
| 410 | spacetime | Ln(Rate) | Proportion of pregnancies with in-facility delivery, Proportion of deliveries with skilled birth attendants, Education (mean years per capita)                                                                                                                                           | 0.72641 | 367 | 0.31482 | 404 | 0 |
| 411 | spacetime | Ln(Rate) | Proportion of pregnancies with in-facility delivery, Proportion of deliveries with skilled birth attendants, Education (mean years per capita), Ln(HIV death rate, females 15-49)                                                                                                        | 0.72418 | 349 | 0.31495 | 424 | 0 |
| 412 | spacetime | Ln(Rate) | Proportion of pregnancies with in-facility delivery, Proportion of deliveries with skilled birth attendants, Ln(Lag distributed income per capita)                                                                                                                                       | 0.73036 | 397 | 0.31475 | 381 | 0 |
| 413 | linear    | Ln(Rate) | Proportion of pregnancies with in-facility delivery, Proportion of deliveries with skilled birth attendants, Ln(Total fertility rate), Ln(HIV death rate, females 15-49), Malnutrition (proportion of population >2SD under mean weight for age), Ln(Lag distributed income per capita)  | 0.73862 | 430 | 0.31465 | 351 | 0 |
| 414 | spacetime | Ln(Rate) | Proportion of pregnancies with in-facility delivery, Education (mean years per capita)                                                                                                                                                                                                   | 0.7275  | 372 | 0.31484 | 412 | 0 |
| 415 | linear    | Ln(Rate) | Age-specific fertility rate, Ln(Total fertility rate), Ln(HIV death rate, females 15-49), Malnutrition (proportion of population >2SD under mean weight for age), Ln(Lag distributed income per capita)                                                                                  | 0.7383  | 429 | 0.31466 | 356 | 0 |
| 416 | spacetime | Ln(Rate) | Education (mean years per capita), Proportion of pregnancies with 4 antenatal care visits, Health system access (capped), Malnutrition (proportion of population >2SD under mean weight for age)                                                                                         | 0.72664 | 368 | 0.31492 | 419 | 0 |
| 417 | linear    | Ln(Rate) | Age-specific fertility rate, Ln(Total fertility rate), Ln(HIV death rate, females 15-49), Ln(Lag distributed income per capita)                                                                                                                                                          | 0.74195 | 444 | 0.31463 | 345 | 0 |
| 418 | linear    | Ln(Rate) | Age-specific fertility rate, Proportion of pregnancies with in-facility delivery, Ln(Total fertility rate), Ln(HIV death rate, females 15-49), Ln(Lag distributed income per capita)                                                                                                     | 0.7408  | 436 | 0.31465 | 353 | 0 |

|     |           |          |                                                                                                                                                                                                                                                               |         |     |         |     |   |
|-----|-----------|----------|---------------------------------------------------------------------------------------------------------------------------------------------------------------------------------------------------------------------------------------------------------------|---------|-----|---------|-----|---|
| 419 | spacetime | Ln(Rate) | Proportion of pregnancies with in-facility delivery, Proportion of deliveries with skilled birth attendants, Ln(HIV death rate, females 15-49), Malnutrition (proportion of population >2SD under mean weight for age), Ln(Lag distributed income per capita) | 0.7268  | 369 | 0.31493 | 421 | 0 |
| 420 | spacetime | Ln(Rate) | Proportion of pregnancies with in-facility delivery, Proportion of deliveries with skilled birth attendants, Education (mean years per capita), Proportion of pregnancies with 4 antenatal care visits, Health system access (capped)                         | 0.72804 | 376 | 0.31486 | 414 | 0 |
| 421 | spacetime | Ln(Rate) | Proportion of pregnancies with in-facility delivery, Education (mean years per capita), Ln(HIV death rate, females 15-49)                                                                                                                                     | 0.72547 | 362 | 0.31498 | 428 | 0 |
| 422 | linear    | Ln(Rate) | Proportion of pregnancies with in-facility delivery, Ln(Total fertility rate), Ln(HIV death rate, females 15-49), Ln(Lag distributed income per capita)                                                                                                       | 0.74087 | 437 | 0.31465 | 354 | 0 |
| 423 | linear    | Ln(Rate) | Proportion of deliveries with skilled birth attendants, Ln(Total fertility rate), Ln(HIV death rate, females 15-49), Ln(Lag distributed income per capita)                                                                                                    | 0.73978 | 433 | 0.31467 | 359 | 0 |
| 424 | linear    | Ln(Rate) | Ln(Total fertility rate), Ln(HIV death rate, females 15-49), Ln(Lag distributed income per capita)                                                                                                                                                            | 0.74214 | 445 | 0.31464 | 347 | 0 |
| 425 | linear    | Ln(Rate) | Proportion of pregnancies with in-facility delivery, Proportion of deliveries with skilled birth attendants, Ln(Total fertility rate), Ln(HIV death rate, females 15-49), Ln(Lag distributed income per capita)                                               | 0.73968 | 432 | 0.31468 | 360 | 0 |
| 426 | spacetime | Ln(Rate) | Age-specific fertility rate, Education (mean years per capita), Ln(HIV death rate, females 15-49)                                                                                                                                                             | 0.72381 | 340 | 0.31527 | 455 | 0 |
| 427 | spacetime | Ln(Rate) | Proportion of deliveries with skilled birth attendants, Ln(HIV death rate, females 15-49), Ln(Lag distributed income per capita)                                                                                                                              | 0.73053 | 399 | 0.31481 | 402 | 0 |
| 428 | linear    | Ln(Rate) | Education (mean years per capita), Ln(Total fertility rate), Ln(Lag distributed income per capita)                                                                                                                                                            | 0.74105 | 438 | 0.31471 | 366 | 0 |
| 429 | linear    | Ln(Rate) | Age-specific fertility rate, Education (mean years per capita), Ln(Total fertility rate), Ln(Lag distributed income per capita)                                                                                                                               | 0.74127 | 441 | 0.3147  | 364 | 0 |
| 430 | spacetime | Ln(Rate) | Proportion of pregnancies with in-facility delivery, Proportion of deliveries with skilled birth attendants, Ln(HIV death rate, females 15-49), Ln(Lag distributed income per capita)                                                                         | 0.731   | 402 | 0.31482 | 405 | 0 |
| 431 | linear    | Ln(Rate) | Proportion of pregnancies with in-facility delivery, Education (mean years per capita), Ln(Total fertility rate), Ln(Lag distributed income per capita)                                                                                                       | 0.74075 | 435 | 0.31475 | 378 | 0 |
| 432 | spacetime | Ln(Rate) | Proportion of pregnancies with in-facility delivery, Ln(Lag distributed income per capita)                                                                                                                                                                    | 0.7346  | 422 | 0.31479 | 393 | 0 |
| 433 | linear    | Ln(Rate) | Age-specific fertility rate, Ln(Total fertility rate), Health system access (capped), Ln(Lag distributed income per capita)                                                                                                                                   | 0.74147 | 442 | 0.31475 | 380 | 0 |
| 434 | linear    | Ln(Rate) | Proportion of deliveries with skilled birth attendants, Education (mean years per capita), Ln(Total fertility rate), Ln(Lag distributed income per capita)                                                                                                    | 0.74126 | 440 | 0.31477 | 388 | 0 |
| 435 | linear    | Ln(Rate) | Age-specific fertility rate, Ln(Total fertility rate), Ln(Lag distributed income per capita)                                                                                                                                                                  | 0.74674 | 464 | 0.31474 | 374 | 0 |

|     |           |          |                                                                                                                                                                                                                                                                                       |         |     |         |     |   |
|-----|-----------|----------|---------------------------------------------------------------------------------------------------------------------------------------------------------------------------------------------------------------------------------------------------------------------------------------|---------|-----|---------|-----|---|
| 436 | linear    | Ln(Rate) | Age-specific fertility rate, Education (mean years per capita), Ln(Total fertility rate), Proportion of pregnancies with 4 antenatal care visits, Health system access (capped), Ln(Lag distributed income per capita)                                                                | 0.74149 | 443 | 0.3148  | 396 | 0 |
| 437 | linear    | Ln(Rate) | Proportion of pregnancies with in-facility delivery, Ln(Total fertility rate), Ln(Lag distributed income per capita)                                                                                                                                                                  | 0.74351 | 451 | 0.31478 | 389 | 0 |
| 438 | spacetime | Ln(Rate) | Proportion of pregnancies with in-facility delivery, Ln(HIV death rate, females 15-49), Ln(Lag distributed income per capita)                                                                                                                                                         | 0.73546 | 426 | 0.31488 | 415 | 0 |
| 439 | linear    | Ln(Rate) | Proportion of pregnancies with in-facility delivery, Proportion of deliveries with skilled birth attendants, Ln(Total fertility rate), Malnutrition (proportion of population >2SD under mean weight for age), Ln(Lag distributed income per capita)                                  | 0.74676 | 465 | 0.31475 | 379 | 0 |
| 440 | linear    | Ln(Rate) | Proportion of pregnancies with in-facility delivery, Proportion of deliveries with skilled birth attendants, Ln(Total fertility rate), Ln(Lag distributed income per capita)                                                                                                          | 0.74303 | 448 | 0.3148  | 397 | 0 |
| 441 | linear    | Ln(Rate) | Ln(Total fertility rate), Ln(Lag distributed income per capita)                                                                                                                                                                                                                       | 0.74697 | 466 | 0.31475 | 383 | 0 |
| 442 | linear    | Ln(Rate) | Proportion of deliveries with skilled birth attendants, Ln(Total fertility rate), Ln(Lag distributed income per capita)                                                                                                                                                               | 0.74317 | 449 | 0.31481 | 401 | 0 |
| 443 | spacetime | Ln(Rate) | Age-specific fertility rate, Proportion of deliveries with skilled birth attendants, Ln(HIV death rate, females 15-49), Proportion of pregnancies with 4 antenatal care visits, Health system access (capped), Malnutrition (proportion of population >2SD under mean weight for age) | 0.72928 | 381 | 0.31556 | 488 | 0 |
| 444 | spacetime | Ln(Rate) | Age-specific fertility rate, Proportion of deliveries with skilled birth attendants, Proportion of pregnancies with 4 antenatal care visits, Health system access (capped), Malnutrition (proportion of population >2SD under mean weight for age)                                    | 0.73249 | 413 | 0.31531 | 456 | 0 |
| 445 | spacetime | Ln(Rate) | Age-specific fertility rate, Proportion of pregnancies with 4 antenatal care visits, Health system access (capped), Malnutrition (proportion of population >2SD under mean weight for age)                                                                                            | 0.7319  | 409 | 0.31535 | 461 | 0 |
| 446 | spacetime | Ln(Rate) | Proportion of deliveries with skilled birth attendants, Proportion of pregnancies with 4 antenatal care visits, Health system access (capped), Malnutrition (proportion of population >2SD under mean weight for age)                                                                 | 0.73467 | 423 | 0.31523 | 450 | 0 |
| 447 | spacetime | Ln(Rate) | Age-specific fertility rate, Proportion of pregnancies with in-facility delivery, Proportion of pregnancies with 4 antenatal care visits, Health system access (capped), Malnutrition (proportion of population >2SD under mean weight for age)                                       | 0.73336 | 418 | 0.31532 | 457 | 0 |
| 448 | spacetime | Ln(Rate) | Proportion of pregnancies with in-facility delivery, Proportion of pregnancies with 4 antenatal care visits, Health system access (capped), Malnutrition (proportion of population >2SD under mean weight for age)                                                                    | 0.7354  | 425 | 0.31523 | 451 | 0 |

|     |           |          |                                                                                                                                                                                                                                                                                                                  |         |     |         |     |   |
|-----|-----------|----------|------------------------------------------------------------------------------------------------------------------------------------------------------------------------------------------------------------------------------------------------------------------------------------------------------------------|---------|-----|---------|-----|---|
| 449 | spacetime | Ln(Rate) | Age-specific fertility rate, Proportion of pregnancies with in-facility delivery, Ln(HIV death rate, females 15-49), Proportion of pregnancies with 4 antenatal care visits, Health system access (capped), Malnutrition (proportion of population >2SD under mean weight for age)                               | 0.72871 | 380 | 0.31559 | 496 | 0 |
| 450 | spacetime | Ln(Rate) | Age-specific fertility rate, Ln(HIV death rate, females 15-49), Proportion of pregnancies with 4 antenatal care visits, Health system access (capped), Malnutrition (proportion of population >2SD under mean weight for age)                                                                                    | 0.72806 | 377 | 0.31562 | 507 | 0 |
| 451 | spacetime | Ln(Rate) | Age-specific fertility rate, Ln(HIV death rate, females 15-49), Ln(Lag distributed income per capita)                                                                                                                                                                                                            | 0.74564 | 461 | 0.31504 | 433 | 0 |
| 452 | spacetime | Ln(Rate) | Age-specific fertility rate, Ln(Lag distributed income per capita)                                                                                                                                                                                                                                               | 0.74637 | 463 | 0.31501 | 432 | 0 |
| 453 | spacetime | Ln(Rate) | Age-specific fertility rate, Education (mean years per capita)                                                                                                                                                                                                                                                   | 0.7438  | 453 | 0.31523 | 449 | 0 |
| 454 | spacetime | Ln(Rate) | Proportion of deliveries with skilled birth attendants, Ln(HIV death rate, females 15-49), Proportion of pregnancies with 4 antenatal care visits, Health system access (capped), Malnutrition (proportion of population >2SD under mean weight for age)                                                         | 0.73369 | 419 | 0.31554 | 485 | 0 |
| 455 | spacetime | Ln(Rate) | Proportion of pregnancies with in-facility delivery, Ln(HIV death rate, females 15-49), Proportion of pregnancies with 4 antenatal care visits, Health system access (capped), Malnutrition (proportion of population >2SD under mean weight for age)                                                            | 0.73372 | 420 | 0.31557 | 491 | 0 |
| 456 | spacetime | Ln(Rate) | Education (mean years per capita), Ln(HIV death rate, females 15-49)                                                                                                                                                                                                                                             | 0.74898 | 468 | 0.31523 | 448 | 0 |
| 457 | linear    | Ln(Rate) | Age-specific fertility rate, Proportion of deliveries with skilled birth attendants, Education (mean years per capita), Ln(Total fertility rate), Ln(HIV death rate, females 15-49), Health system access (capped), Malnutrition (proportion of population >2SD under mean weight for age)                       | 0.74556 | 460 | 0.31534 | 459 | 0 |
| 458 | linear    | Ln(Rate) | Age-specific fertility rate, Education (mean years per capita), Ln(Total fertility rate), Ln(HIV death rate, females 15-49), Proportion of pregnancies with 4 antenatal care visits, Health system access (capped), Malnutrition (proportion of population >2SD under mean weight for age)                       | 0.74491 | 457 | 0.31535 | 462 | 0 |
| 459 | linear    | Ln(Rate) | Age-specific fertility rate, Proportion of pregnancies with in-facility delivery, Education (mean years per capita), Ln(Total fertility rate), Ln(HIV death rate, females 15-49), Proportion of pregnancies with 4 antenatal care visits, Malnutrition (proportion of population >2SD under mean weight for age) | 0.74324 | 450 | 0.31539 | 470 | 0 |
| 460 | spacetime | Ln(Rate) | Age-specific fertility rate, Proportion of pregnancies with in-facility delivery, Proportion of deliveries with skilled birth attendants, Malnutrition (proportion of population >2SD under mean weight for age)                                                                                                 | 0.74253 | 446 | 0.31542 | 476 | 0 |

|     |           |          |                                                                                                                                                                                                                                                                                                                     |         |     |         |     |   |
|-----|-----------|----------|---------------------------------------------------------------------------------------------------------------------------------------------------------------------------------------------------------------------------------------------------------------------------------------------------------------------|---------|-----|---------|-----|---|
| 461 | linear    | Ln(Rate) | Education (mean years per capita), Ln(Total fertility rate), Ln(HIV death rate, females 15-49), Proportion of pregnancies with 4 antenatal care visits, Health system access (capped), Malnutrition (proportion of population >2SD under mean weight for age)                                                       | 0.74464 | 456 | 0.31538 | 467 | 0 |
| 462 | linear    | Ln(Rate) | Age-specific fertility rate, Proportion of deliveries with skilled birth attendants, Education (mean years per capita), Ln(Total fertility rate), Ln(HIV death rate, females 15-49), Proportion of pregnancies with 4 antenatal care visits, Malnutrition (proportion of population >2SD under mean weight for age) | 0.74429 | 455 | 0.31538 | 469 | 0 |
| 463 | linear    | Ln(Rate) | Proportion of pregnancies with in-facility delivery, Education (mean years per capita), Ln(Total fertility rate), Ln(HIV death rate, females 15-49), Proportion of pregnancies with 4 antenatal care visits, Malnutrition (proportion of population >2SD under mean weight for age)                                 | 0.74353 | 452 | 0.31541 | 474 | 0 |
| 464 | linear    | Ln(Rate) | Proportion of deliveries with skilled birth attendants, Education (mean years per capita), Ln(Total fertility rate), Ln(HIV death rate, females 15-49), Health system access (capped), Malnutrition (proportion of population >2SD under mean weight for age)                                                       | 0.74569 | 462 | 0.31536 | 464 | 0 |
| 465 | linear    | Ln(Rate) | Proportion of deliveries with skilled birth attendants, Education (mean years per capita), Ln(Total fertility rate), Ln(HIV death rate, females 15-49), Proportion of pregnancies with 4 antenatal care visits, Malnutrition (proportion of population >2SD under mean weight for age)                              | 0.74494 | 458 | 0.31539 | 471 | 0 |
| 466 | spacetime | Ln(Rate) | Ln(HIV death rate, females 15-49), Proportion of pregnancies with 4 antenatal care visits, Health system access (capped), Malnutrition (proportion of population >2SD under mean weight for age)                                                                                                                    | 0.7363  | 427 | 0.31562 | 506 | 0 |
| 467 | linear    | Ln(Rate) | Proportion of pregnancies with in-facility delivery, Education (mean years per capita), Ln(Total fertility rate), Ln(HIV death rate, females 15-49), Proportion of pregnancies with 4 antenatal care visits, Health system access (capped)                                                                          | 0.75029 | 469 | 0.31536 | 465 | 0 |
| 468 | spacetime | Ln(Rate) | Proportion of pregnancies with in-facility delivery, Proportion of deliveries with skilled birth attendants, Malnutrition (proportion of population >2SD under mean weight for age)                                                                                                                                 | 0.7483  | 467 | 0.31538 | 468 | 0 |
| 469 | linear    | Ln(Rate) | Age-specific fertility rate, Proportion of pregnancies with in-facility delivery, Education (mean years per capita), Ln(Total fertility rate), Ln(HIV death rate, females 15-49), Proportion of pregnancies with 4 antenatal care visits, Health system access (capped)                                             | 0.75184 | 476 | 0.31534 | 460 | 0 |
| 470 | linear    | Ln(Rate) | Age-specific fertility rate, Proportion of deliveries with skilled birth attendants, Education (mean years per capita), Ln(Total fertility rate), Ln(HIV death rate, females 15-49)                                                                                                                                 | 0.75532 | 484 | 0.31524 | 453 | 0 |
| 471 | linear    | Ln(Rate) | Proportion of deliveries with skilled birth attendants, Education (mean years per capita), Ln(Total fertility rate), Ln(HIV death rate, females 15-49)                                                                                                                                                              | 0.75506 | 483 | 0.31526 | 454 | 0 |



|     |           |          |                                                                                                                                                                                                                                                                                                                                                                 |         |     |         |     |   |
|-----|-----------|----------|-----------------------------------------------------------------------------------------------------------------------------------------------------------------------------------------------------------------------------------------------------------------------------------------------------------------------------------------------------------------|---------|-----|---------|-----|---|
| 472 | linear    | Ln(Rate) | Proportion of deliveries with skilled birth attendants, Education (mean years per capita), Ln(Total fertility rate), Ln(HIV death rate, females 15-49), Proportion of pregnancies with 4 antenatal care visits, Health system access (capped)                                                                                                                   | 0.75163 | 474 | 0.31535 | 463 | 0 |
| 473 | linear    | Ln(Rate) | Age-specific fertility rate, Proportion of deliveries with skilled birth attendants, Education (mean years per capita), Ln(Total fertility rate), Ln(HIV death rate, females 15-49), Proportion of pregnancies with 4 antenatal care visits, Health system access (capped)                                                                                      | 0.75309 | 481 | 0.31533 | 458 | 0 |
| 474 | spacetime | Ln(Rate) | Education (mean years per capita)                                                                                                                                                                                                                                                                                                                               | 0.75933 | 499 | 0.31517 | 442 | 0 |
| 475 | linear    | Ln(Rate) | Age-specific fertility rate, Proportion of pregnancies with in-facility delivery, Education (mean years per capita), Ln(Total fertility rate), Ln(HIV death rate, females 15-49)                                                                                                                                                                                | 0.75801 | 495 | 0.31522 | 447 | 0 |
| 476 | linear    | Ln(Rate) | Education (mean years per capita), Ln(Total fertility rate), Ln(HIV death rate, females 15-49)                                                                                                                                                                                                                                                                  | 0.75916 | 498 | 0.3152  | 445 | 0 |
| 477 | linear    | Ln(Rate) | Age-specific fertility rate, Education (mean years per capita), Ln(Total fertility rate), Ln(HIV death rate, females 15-49)                                                                                                                                                                                                                                     | 0.75967 | 501 | 0.31519 | 443 | 0 |
| 478 | linear    | Ln(Rate) | Age-specific fertility rate, Proportion of pregnancies with in-facility delivery, Education (mean years per capita), Ln(HIV death rate, females 15-49), Ln(Lag distributed income per capita)                                                                                                                                                                   | 0.75159 | 473 | 0.3154  | 472 | 0 |
| 479 | linear    | Ln(Rate) | Proportion of pregnancies with in-facility delivery, Education (mean years per capita), Ln(Total fertility rate), Ln(HIV death rate, females 15-49)                                                                                                                                                                                                             | 0.75737 | 493 | 0.31524 | 452 | 0 |
| 480 | spacetime | Ln(Rate) | Age-specific fertility rate, Proportion of pregnancies with in-facility delivery, Proportion of deliveries with skilled birth attendants, Ln(HIV death rate, females 15-49), Malnutrition (proportion of population >2SD under mean weight for age)                                                                                                             | 0.73525 | 424 | 0.31575 | 523 | 0 |
| 481 | linear    | Ln(Rate) | Age-specific fertility rate, Proportion of deliveries with skilled birth attendants, Education (mean years per capita), Ln(HIV death rate, females 15-49), Ln(Lag distributed income per capita)                                                                                                                                                                | 0.75095 | 471 | 0.31543 | 477 | 0 |
| 482 | linear    | Ln(Rate) | Age-specific fertility rate, Proportion of deliveries with skilled birth attendants, Education (mean years per capita), Ln(HIV death rate, females 15-49), Proportion of pregnancies with 4 antenatal care visits, Health system access (capped), Malnutrition (proportion of population >2SD under mean weight for age), Ln(Lag distributed income per capita) | 0.75086 | 470 | 0.31552 | 483 | 0 |
| 483 | linear    | Ln(Rate) | Age-specific fertility rate, Education (mean years per capita), Ln(HIV death rate, females 15-49), Proportion of pregnancies with 4 antenatal care visits, Health system access (capped), Malnutrition (proportion of population >2SD under mean weight for age), Ln(Lag distributed income per capita)                                                         | 0.75154 | 472 | 0.31556 | 490 | 0 |
| 484 | linear    | Ln(Rate) | Age-specific fertility rate, Proportion of pregnancies with in-facility delivery, Education (mean years per capita), Ln(HIV death rate, females 15-49), Proportion of pregnancies with 4 antenatal care visits, Health system access (capped), Malnutrition (proportion of population >2SD under mean weight for age), Ln(Lag distributed income per capita)    | 0.75284 | 478 | 0.31555 | 486 | 0 |

|     |           |          |                                                                                                                                                                                                                                                                                                                                    |         |     |         |     |   |
|-----|-----------|----------|------------------------------------------------------------------------------------------------------------------------------------------------------------------------------------------------------------------------------------------------------------------------------------------------------------------------------------|---------|-----|---------|-----|---|
| 485 | linear    | Ln(Rate) | Proportion of pregnancies with in-facility delivery, Education (mean years per capita), Ln(HIV death rate, females 15-49), Ln(Lag distributed income per capita)                                                                                                                                                                   | 0.75871 | 497 | 0.3154  | 473 | 0 |
| 486 | linear    | Ln(Rate) | Proportion of deliveries with skilled birth attendants, Education (mean years per capita), Ln(HIV death rate, females 15-49), Ln(Lag distributed income per capita)                                                                                                                                                                | 0.75691 | 491 | 0.31546 | 479 | 0 |
| 487 | linear    | Ln(Rate) | Proportion of pregnancies with in-facility delivery, Proportion of deliveries with skilled birth attendants, Education (mean years per capita), Ln(HIV death rate, females 15-49), Ln(Lag distributed income per capita)                                                                                                           | 0.75738 | 494 | 0.31544 | 478 | 0 |
| 488 | linear    | Ln(Rate) | Proportion of pregnancies with in-facility delivery, Ln(Total fertility rate), Ln(HIV death rate, females 15-49), Proportion of pregnancies with 4 antenatal care visits, Health system access (capped), Malnutrition (proportion of population >2SD under mean weight for age)                                                    | 0.75297 | 479 | 0.31559 | 498 | 0 |
| 489 | linear    | Ln(Rate) | Proportion of deliveries with skilled birth attendants, Ln(Total fertility rate), Ln(HIV death rate, females 15-49), Proportion of pregnancies with 4 antenatal care visits, Health system access (capped), Malnutrition (proportion of population >2SD under mean weight for age)                                                 | 0.75613 | 486 | 0.31557 | 492 | 0 |
| 490 | spacetime | Ln(Rate) | Proportion of pregnancies with in-facility delivery, Proportion of deliveries with skilled birth attendants, Ln(HIV death rate, females 15-49), Malnutrition (proportion of population >2SD under mean weight for age)                                                                                                             | 0.74393 | 454 | 0.31577 | 525 | 0 |
| 491 | linear    | Ln(Rate) | Proportion of deliveries with skilled birth attendants, Education (mean years per capita), Ln(HIV death rate, females 15-49), Proportion of pregnancies with 4 antenatal care visits, Health system access (capped), Malnutrition (proportion of population >2SD under mean weight for age), Ln(Lag distributed income per capita) | 0.75542 | 485 | 0.31559 | 497 | 0 |
| 492 | linear    | Ln(Rate) | Proportion of pregnancies with in-facility delivery, Proportion of deliveries with skilled birth attendants, Education (mean years per capita), Ln(HIV death rate, females 15-49), Proportion of pregnancies with 4 antenatal care visits, Health system access (capped), Ln(Lag distributed income per capita)                    | 0.75643 | 489 | 0.31558 | 494 | 0 |
| 493 | linear    | Ln(Rate) | Ln(Total fertility rate), Ln(HIV death rate, females 15-49), Proportion of pregnancies with 4 antenatal care visits, Health system access (capped), Malnutrition (proportion of population >2SD under mean weight for age)                                                                                                         | 0.75461 | 482 | 0.3156  | 502 | 0 |
| 494 | linear    | Ln(Rate) | Age-specific fertility rate, Education (mean years per capita), Ln(HIV death rate, females 15-49), Ln(Lag distributed income per capita)                                                                                                                                                                                           | 0.75983 | 502 | 0.31556 | 487 | 0 |

|     |           |          |                                                                                                                                                                                                                                                                                                                                 |         |     |         |     |   |
|-----|-----------|----------|---------------------------------------------------------------------------------------------------------------------------------------------------------------------------------------------------------------------------------------------------------------------------------------------------------------------------------|---------|-----|---------|-----|---|
| 495 | linear    | Ln(Rate) | Proportion of pregnancies with in-facility delivery, Education (mean years per capita), Ln(HIV death rate, females 15-49), Proportion of pregnancies with 4 antenatal care visits, Health system access (capped), Malnutrition (proportion of population >2SD under mean weight for age), Ln(Lag distributed income per capita) | 0.75617 | 487 | 0.31561 | 503 | 0 |
| 496 | linear    | Ln(Rate) | Age-specific fertility rate, Ln(Total fertility rate), Ln(HIV death rate, females 15-49), Proportion of pregnancies with 4 antenatal care visits, Health system access (capped)                                                                                                                                                 | 0.76333 | 513 | 0.31556 | 489 | 0 |
| 497 | linear    | Ln(Rate) | Education (mean years per capita), Ln(HIV death rate, females 15-49), Proportion of pregnancies with 4 antenatal care visits, Health system access (capped), Malnutrition (proportion of population >2SD under mean weight for age), Ln(Lag distributed income per capita)                                                      | 0.75667 | 490 | 0.31566 | 513 | 0 |
| 498 | spacetime | Ln(Rate) | Proportion of deliveries with skilled birth attendants                                                                                                                                                                                                                                                                          | 0.76045 | 503 | 0.31559 | 500 | 0 |
| 499 | spacetime | Ln(Rate) | Age-specific fertility rate, Proportion of deliveries with skilled birth attendants                                                                                                                                                                                                                                             | 0.75709 | 492 | 0.31568 | 516 | 0 |
| 500 | linear    | Ln(Rate) | Age-specific fertility rate, Proportion of pregnancies with in-facility delivery, Education (mean years per capita), Ln(Lag distributed income per capita)                                                                                                                                                                      | 0.76197 | 507 | 0.31559 | 501 | 0 |
| 501 | spacetime | Ln(Rate) | Proportion of deliveries with skilled birth attendants, Ln(HIV death rate, females 15-49)                                                                                                                                                                                                                                       | 0.75638 | 488 | 0.31572 | 521 | 0 |
| 502 | linear    | Ln(Rate) | Age-specific fertility rate, Proportion of pregnancies with in-facility delivery, Proportion of deliveries with skilled birth attendants, Education (mean years per capita), Ln(Lag distributed income per capita)                                                                                                              | 0.76196 | 506 | 0.31561 | 504 | 0 |
| 503 | spacetime | Ln(Rate) | Proportion of pregnancies with in-facility delivery, Proportion of deliveries with skilled birth attendants                                                                                                                                                                                                                     | 0.76324 | 512 | 0.31559 | 499 | 0 |
| 504 | spacetime | Ln(Rate) | Age-specific fertility rate, Proportion of pregnancies with in-facility delivery, Proportion of deliveries with skilled birth attendants,                                                                                                                                                                                       | 0.75814 | 496 | 0.31568 | 515 | 0 |
| 505 | spacetime | Ln(Rate) | Ln(HIV death rate, females 15-49), Ln(Lag distributed income per capita)                                                                                                                                                                                                                                                        | 0.77053 | 531 | 0.31551 | 482 | 0 |
| 506 | linear    | Ln(Rate) | Proportion of deliveries with skilled birth attendants, Education (mean years per capita), Ln(Total fertility rate)                                                                                                                                                                                                             | 0.77083 | 532 | 0.31551 | 481 | 0 |
| 507 | linear    | Ln(Rate) | Age-specific fertility rate, Proportion of deliveries with skilled birth attendants, Education (mean years per capita), Ln(Lag distributed income per capita)                                                                                                                                                                   | 0.76146 | 504 | 0.31563 | 510 | 0 |
| 508 | spacetime | Ln(Rate) | Age-specific fertility rate, Proportion of deliveries with skilled birth attendants, Ln(HIV death rate, females 15-49)                                                                                                                                                                                                          | 0.75178 | 475 | 0.31582 | 543 | 0 |
| 509 | linear    | Ln(Rate) | Proportion of pregnancies with in-facility delivery, Education (mean years per capita), Ln(Total fertility rate)                                                                                                                                                                                                                | 0.77274 | 538 | 0.31548 | 480 | 0 |
| 510 | spacetime | Ln(Rate) | Proportion of pregnancies with in-facility delivery, Proportion of deliveries with skilled birth attendants, Ln(HIV death rate, females 15-49)                                                                                                                                                                                  | 0.75945 | 500 | 0.31572 | 520 | 0 |
| 511 | linear    | Ln(Rate) | Proportion of pregnancies with in-facility delivery, Education (mean years per capita), Ln(Lag distributed income per capita)                                                                                                                                                                                                   | 0.7675  | 525 | 0.31558 | 495 | 0 |

|     |           |          |                                                                                                                                                                                                                                                                                                 |         |     |         |     |   |
|-----|-----------|----------|-------------------------------------------------------------------------------------------------------------------------------------------------------------------------------------------------------------------------------------------------------------------------------------------------|---------|-----|---------|-----|---|
| 512 | spacetime | Ln(Rate) | Age-specific fertility rate, Proportion of pregnancies with in-facility delivery, Proportion of deliveries with skilled birth attendants, Ln(HIV death rate, females 15-49)                                                                                                                     | 0.75308 | 480 | 0.31582 | 542 | 0 |
| 513 | linear    | Ln(Rate) | Proportion of pregnancies with in-facility delivery, Proportion of deliveries with skilled birth attendants, Education (mean years per capita), Health system access (capped), Malnutrition (proportion of population >2SD under mean weight for age), Ln(Lag distributed income per capita)    | 0.7628  | 508 | 0.31571 | 517 | 0 |
| 514 | linear    | Ln(Rate) | Proportion of pregnancies with in-facility delivery, Proportion of deliveries with skilled birth attendants, Education (mean years per capita), Ln(Lag distributed income per capita)                                                                                                           | 0.76667 | 524 | 0.31561 | 505 | 0 |
| 515 | linear    | Ln(Rate) | Age-specific fertility rate, Proportion of pregnancies with in-facility delivery, Education (mean years per capita), Proportion of pregnancies with 4 antenatal care visits, Health system access (capped), Ln(Lag distributed income per capita)                                               | 0.76151 | 505 | 0.31576 | 524 | 0 |
| 516 | linear    | Ln(Rate) | Proportion of deliveries with skilled birth attendants, Education (mean years per capita), Ln(Lag distributed income per capita)                                                                                                                                                                | 0.76577 | 520 | 0.31564 | 512 | 0 |
| 517 | linear    | Ln(Rate) | Education (mean years per capita), Ln(Total fertility rate)                                                                                                                                                                                                                                     | 0.77673 | 557 | 0.31542 | 475 | 0 |
| 518 | linear    | Ln(Rate) | Age-specific fertility rate, Proportion of pregnancies with in-facility delivery, Ln(Total fertility rate), Ln(HIV death rate, females 15-49), Health system access (capped)                                                                                                                    | 0.77372 | 544 | 0.31557 | 493 | 0 |
| 519 | linear    | Ln(Rate) | Age-specific fertility rate, Education (mean years per capita), Ln(Total fertility rate), Health system access (capped), Malnutrition (proportion of population >2SD under mean weight for age)                                                                                                 | 0.77582 | 554 | 0.31553 | 484 | 0 |
| 520 | linear    | Ln(Rate) | Age-specific fertility rate, Education (mean years per capita), Ln(Total fertility rate)                                                                                                                                                                                                        | 0.77956 | 574 | 0.31537 | 466 | 0 |
| 521 | linear    | Ln(Rate) | Proportion of deliveries with skilled birth attendants, Education (mean years per capita), Ln(Total fertility rate), Proportion of pregnancies with 4 antenatal care visits, Malnutrition (proportion of population >2SD under mean weight for age)                                             | 0.77196 | 533 | 0.31562 | 508 | 0 |
| 522 | linear    | Ln(Rate) | Proportion of pregnancies with in-facility delivery, Education (mean years per capita), Ln(Total fertility rate), Proportion of pregnancies with 4 antenatal care visits, Malnutrition (proportion of population >2SD under mean weight for age)                                                | 0.77197 | 534 | 0.31562 | 509 | 0 |
| 523 | linear    | Ln(Rate) | Proportion of deliveries with skilled birth attendants, Education (mean years per capita), Proportion of pregnancies with 4 antenatal care visits, Health system access (capped), Malnutrition (proportion of population >2SD under mean weight for age), Ln(Lag distributed income per capita) | 0.76449 | 515 | 0.3158  | 534 | 0 |
| 524 | linear    | Ln(Rate) | Age-specific fertility rate, Ln(Total fertility rate), Ln(HIV death rate, females 15-49), Malnutrition (proportion of population >2SD under mean weight for age)                                                                                                                                | 0.76978 | 530 | 0.31572 | 519 | 0 |

|     |        |          |                                                                                                                                                                                                                                                                                                                              |         |     |         |     |   |
|-----|--------|----------|------------------------------------------------------------------------------------------------------------------------------------------------------------------------------------------------------------------------------------------------------------------------------------------------------------------------------|---------|-----|---------|-----|---|
| 525 | linear | Ln(Rate) | Education (mean years per capita), Ln(Total fertility rate), Proportion of pregnancies with 4 antenatal care visits, Health system access (capped), Malnutrition (proportion of population >2SD under mean weight for age)                                                                                                   | 0.7724  | 537 | 0.31567 | 514 | 0 |
| 526 | linear | Ln(Rate) | Proportion of pregnancies with in-facility delivery, Proportion of deliveries with skilled birth attendants, Education (mean years per capita), Proportion of pregnancies with 4 antenatal care visits, Health system access (capped), Ln(Lag distributed income per capita)                                                 | 0.7636  | 514 | 0.3158  | 537 | 0 |
| 527 | linear | Ln(Rate) | Age-specific fertility rate, Education (mean years per capita), Ln(Total fertility rate), Proportion of pregnancies with 4 antenatal care visits, Health system access (capped)                                                                                                                                              | 0.77306 | 541 | 0.31563 | 511 | 0 |
| 528 | linear | Ln(Rate) | Age-specific fertility rate, Proportion of deliveries with skilled birth attendants, Ln(HIV death rate, females 15-49), Proportion of pregnancies with 4 antenatal care visits, Health system access (capped), Malnutrition (proportion of population >2SD under mean weight for age), Ln(Lag distributed income per capita) | 0.76636 | 521 | 0.31579 | 532 | 0 |
| 529 | linear | Ln(Rate) | Age-specific fertility rate, Ln(HIV death rate, females 15-49), Proportion of pregnancies with 4 antenatal care visits, Health system access (capped), Malnutrition (proportion of population >2SD under mean weight for age), Ln(Lag distributed income per capita)                                                         | 0.76562 | 519 | 0.3158  | 536 | 0 |
| 530 | linear | Ln(Rate) | Proportion of pregnancies with in-facility delivery, Education (mean years per capita), Proportion of pregnancies with 4 antenatal care visits, Health system access (capped), Malnutrition (proportion of population >2SD under mean weight for age), Ln(Lag distributed income per capita)                                 | 0.76476 | 517 | 0.3158  | 539 | 0 |
| 531 | linear | Ln(Rate) | Age-specific fertility rate, Education (mean years per capita), Proportion of pregnancies with 4 antenatal care visits, Health system access (capped), Malnutrition (proportion of population >2SD under mean weight for age), Ln(Lag distributed income per capita)                                                         | 0.7631  | 511 | 0.31584 | 550 | 0 |
| 532 | linear | Ln(Rate) | Proportion of deliveries with skilled birth attendants, Ln(Total fertility rate), Ln(HIV death rate, females 15-49)                                                                                                                                                                                                          | 0.77234 | 536 | 0.31579 | 530 | 0 |
| 533 | linear | Ln(Rate) | Proportion of pregnancies with in-facility delivery, Proportion of deliveries with skilled birth attendants, Ln(Total fertility rate), Ln(HIV death rate, females 15-49)                                                                                                                                                     | 0.77208 | 535 | 0.3158  | 535 | 0 |
| 534 | linear | Ln(Rate) | Education (mean years per capita), Ln(HIV death rate, females 15-49), Ln(Lag distributed income per capita)                                                                                                                                                                                                                  | 0.77497 | 548 | 0.31574 | 522 | 0 |
| 535 | linear | Ln(Rate) | Age-specific fertility rate, Proportion of pregnancies with in-facility delivery, Ln(HIV death rate, females 15-49), Proportion of pregnancies with 4 antenatal care visits, Health system access (capped), Malnutrition (proportion of population >2SD under mean weight for age), Ln(Lag distributed income per capita)    | 0.76856 | 529 | 0.31583 | 546 | 0 |

|     |           |          |                                                                                                                                                                                                                                                                                                                          |         |     |         |     |   |
|-----|-----------|----------|--------------------------------------------------------------------------------------------------------------------------------------------------------------------------------------------------------------------------------------------------------------------------------------------------------------------------|---------|-----|---------|-----|---|
| 536 | linear    | Ln(Rate) | Age-specific fertility rate, Education (mean years per capita), Ln(Lag distributed income per capita)                                                                                                                                                                                                                    | 0.77339 | 543 | 0.31579 | 533 | 0 |
| 537 | linear    | Ln(Rate) | Age-specific fertility rate, Proportion of pregnancies with in-facility delivery, Ln(Total fertility rate), Ln(HIV death rate, females 15-49)                                                                                                                                                                            | 0.77524 | 549 | 0.31578 | 528 | 0 |
| 538 | linear    | Ln(Rate) | Proportion of pregnancies with in-facility delivery, Ln(Total fertility rate), Ln(HIV death rate, females 15-49)                                                                                                                                                                                                         | 0.77562 | 552 | 0.31579 | 531 | 0 |
| 539 | spacetime | Ln(Rate) | Age-specific fertility rate, Proportion of pregnancies with in-facility delivery                                                                                                                                                                                                                                         | 0.76755 | 526 | 0.31589 | 560 | 0 |
| 540 | linear    | Ln(Rate) | Education (mean years per capita), Proportion of pregnancies with 4 antenatal care visits, Health system access (capped), Malnutrition (proportion of population >2SD under mean weight for age), Ln(Lag distributed income per capita)                                                                                  | 0.76543 | 518 | 0.31592 | 569 | 0 |
| 541 | linear    | Ln(Rate) | Proportion of pregnancies with in-facility delivery, Proportion of deliveries with skilled birth attendants, Ln(Total fertility rate), Ln(HIV death rate, females 15-49), Malnutrition (proportion of population >2SD under mean weight for age)                                                                         | 0.77797 | 564 | 0.31577 | 526 | 0 |
| 542 | linear    | Ln(Rate) | Age-specific fertility rate, Proportion of pregnancies with in-facility delivery, Proportion of deliveries with skilled birth attendants, Ln(HIV death rate, females 15-49), Malnutrition (proportion of population >2SD under mean weight for age), Ln(Lag distributed income per capita)                               | 0.77282 | 539 | 0.31586 | 554 | 0 |
| 543 | linear    | Ln(Rate) | Ln(Total fertility rate), Proportion of pregnancies with 4 antenatal care visits, Health system access (capped), Malnutrition (proportion of population >2SD under mean weight for age)                                                                                                                                  | 0.77415 | 546 | 0.31584 | 549 | 0 |
| 544 | spacetime | Ln(Rate) | Age-specific fertility rate, Proportion of pregnancies with in-facility delivery, Ln(HIV death rate, females 15-49)                                                                                                                                                                                                      | 0.76304 | 510 | 0.31604 | 587 | 0 |
| 545 | linear    | Ln(Rate) | Age-specific fertility rate, Proportion of deliveries with skilled birth attendants, Education (mean years per capita), Ln(HIV death rate, females 15-49), Proportion of pregnancies with 4 antenatal care visits, Health system access (capped), Malnutrition (proportion of population >2SD under mean weight for age) | 0.76285 | 509 | 0.31607 | 592 | 0 |
| 546 | linear    | Ln(Rate) | Proportion of deliveries with skilled birth attendants, Ln(HIV death rate, females 15-49), Proportion of pregnancies with 4 antenatal care visits, Health system access (capped), Malnutrition (proportion of population >2SD under mean weight for age), Ln(Lag distributed income per capita)                          | 0.77283 | 540 | 0.31589 | 562 | 0 |
| 547 | linear    | Ln(Rate) | Age-specific fertility rate, Proportion of pregnancies with in-facility delivery, Proportion of deliveries with skilled birth attendants, Ln(HIV death rate, females 15-49), Ln(Lag distributed income per capita)                                                                                                       | 0.77746 | 562 | 0.31581 | 540 | 0 |
| 548 | linear    | Ln(Rate) | Age-specific fertility rate, Proportion of deliveries with skilled birth attendants, Ln(HIV death rate, females 15-49), Ln(Lag distributed income per capita)                                                                                                                                                            | 0.77737 | 561 | 0.31581 | 541 | 0 |
| 549 | spacetime | Ln(Rate) | Proportion of pregnancies with in-facility delivery                                                                                                                                                                                                                                                                      | 0.77803 | 565 | 0.3158  | 538 | 0 |

|     |        |          |                                                                                                                                                                                                                                                                                                                       |         |     |         |     |   |
|-----|--------|----------|-----------------------------------------------------------------------------------------------------------------------------------------------------------------------------------------------------------------------------------------------------------------------------------------------------------------------|---------|-----|---------|-----|---|
| 550 | linear | Ln(Rate) | Age-specific fertility rate, Education (mean years per capita), Ln(HIV death rate, females 15-49), Proportion of pregnancies with 4 antenatal care visits, Health system access (capped), Malnutrition (proportion of population >2SD under mean weight for age)                                                      | 0.7664  | 522 | 0.31603 | 585 | 0 |
| 551 | linear | Ln(Rate) | Education (mean years per capita), Ln(HIV death rate, females 15-49), Proportion of pregnancies with 4 antenatal care visits, Health system access (capped), Malnutrition (proportion of population >2SD under mean weight for age)                                                                                   | 0.76831 | 528 | 0.31602 | 582 | 0 |
| 552 | linear | Ln(Rate) | Age-specific fertility rate, Proportion of pregnancies with in-facility delivery, Education (mean years per capita), Ln(HIV death rate, females 15-49), Proportion of pregnancies with 4 antenatal care visits, Health system access (capped), Malnutrition (proportion of population >2SD under mean weight for age) | 0.76454 | 516 | 0.31607 | 594 | 0 |
| 553 | linear | Ln(Rate) | Ln(HIV death rate, females 15-49), Proportion of pregnancies with 4 antenatal care visits, Health system access (capped), Malnutrition (proportion of population >2SD under mean weight for age), Ln(Lag distributed income per capita)                                                                               | 0.77308 | 542 | 0.31592 | 568 | 0 |
| 554 | linear | Ln(Rate) | Proportion of deliveries with skilled birth attendants, Education (mean years per capita), Ln(HIV death rate, females 15-49), Proportion of pregnancies with 4 antenatal care visits, Health system access (capped), Malnutrition (proportion of population >2SD under mean weight for age)                           | 0.76661 | 523 | 0.31604 | 588 | 0 |
| 555 | linear | Ln(Rate) | Proportion of deliveries with skilled birth attendants, Ln(Total fertility rate), Proportion of pregnancies with 4 antenatal care visits, Health system access (capped), Malnutrition (proportion of population >2SD under mean weight for age)                                                                       | 0.77931 | 572 | 0.31582 | 544 | 0 |
| 556 | linear | Ln(Rate) | Proportion of pregnancies with in-facility delivery, Ln(Total fertility rate), Proportion of pregnancies with 4 antenatal care visits, Health system access (capped), Malnutrition (proportion of population >2SD under mean weight for age)                                                                          | 0.77901 | 570 | 0.31583 | 547 | 0 |
| 557 | linear | Ln(Rate) | Ln(Total fertility rate), Ln(HIV death rate, females 15-49)                                                                                                                                                                                                                                                           | 0.78202 | 588 | 0.31578 | 529 | 0 |
| 558 | linear | Ln(Rate) | Proportion of pregnancies with in-facility delivery, Education (mean years per capita), Ln(HIV death rate, females 15-49), Proportion of pregnancies with 4 antenatal care visits, Health system access (capped), Malnutrition (proportion of population >2SD under mean weight for age)                              | 0.76764 | 527 | 0.31605 | 590 | 0 |
| 559 | linear | Ln(Rate) | Age-specific fertility rate, Ln(Total fertility rate), Ln(HIV death rate, females 15-49)                                                                                                                                                                                                                              | 0.78338 | 593 | 0.31577 | 527 | 0 |
| 560 | linear | Ln(Rate) | Age-specific fertility rate, Proportion of pregnancies with in-facility delivery, Proportion of deliveries with skilled birth attendants, Education (mean years per capita), Ln(HIV death rate, females 15-49)                                                                                                        | 0.77682 | 558 | 0.3159  | 564 | 0 |

|     |           |          |                                                                                                                                                                                                                                                                                              |         |     |         |     |   |
|-----|-----------|----------|----------------------------------------------------------------------------------------------------------------------------------------------------------------------------------------------------------------------------------------------------------------------------------------------|---------|-----|---------|-----|---|
| 561 | linear    | Ln(Rate) | Proportion of pregnancies with in-facility delivery, Ln(HIV death rate, females 15-49), Proportion of pregnancies with 4 antenatal care visits, Health system access (capped), Malnutrition (proportion of population >2SD under mean weight for age), Ln(Lag distributed income per capita) | 0.7758  | 553 | 0.31592 | 570 | 0 |
| 562 | spacetime | Ln(Rate) | Proportion of pregnancies with in-facility delivery, Ln(HIV death rate, females 15-49)                                                                                                                                                                                                       | 0.77464 | 547 | 0.31596 | 576 | 0 |
| 563 | linear    | Ln(Rate) | Age-specific fertility rate, Proportion of deliveries with skilled birth attendants, Education (mean years per capita), Ln(HIV death rate, females 15-49)                                                                                                                                    | 0.77708 | 560 | 0.3159  | 563 | 0 |
| 564 | linear    | Ln(Rate) | Age-specific fertility rate, Proportion of pregnancies with 4 antenatal care visits, Health system access (capped), Malnutrition (proportion of population >2SD under mean weight for age), Ln(Lag distributed income per capita)                                                            | 0.77381 | 545 | 0.31603 | 584 | 0 |
| 565 | linear    | Ln(Rate) | Age-specific fertility rate, Proportion of pregnancies with in-facility delivery, Ln(HIV death rate, females 15-49), Ln(Lag distributed income per capita)                                                                                                                                   | 0.78064 | 584 | 0.31583 | 548 | 0 |
| 566 | linear    | Ln(Rate) | Age-specific fertility rate, Proportion of pregnancies with in-facility delivery, Proportion of pregnancies with 4 antenatal care visits, Health system access (capped), Malnutrition (proportion of population >2SD under mean weight for age), Ln(Lag distributed income per capita)       | 0.77538 | 551 | 0.316   | 581 | 0 |
| 567 | linear    | Ln(Rate) | Age-specific fertility rate, Ln(Total fertility rate), Health system access (capped)                                                                                                                                                                                                         | 0.79016 | 615 | 0.31572 | 518 | 0 |
| 568 | linear    | Ln(Rate) | Proportion of deliveries with skilled birth attendants, Ln(Total fertility rate)                                                                                                                                                                                                             | 0.77878 | 568 | 0.31592 | 567 | 0 |
| 569 | linear    | Ln(Rate) | Proportion of pregnancies with in-facility delivery, Proportion of deliveries with skilled birth attendants, Ln(Total fertility rate)                                                                                                                                                        | 0.77898 | 569 | 0.31592 | 566 | 0 |
| 570 | linear    | Ln(Rate) | Age-specific fertility rate, Proportion of pregnancies with in-facility delivery, Proportion of deliveries with skilled birth attendants, Education (mean years per capita), Ln(HIV death rate, females 15-49), Health system access (capped)                                                | 0.77526 | 550 | 0.31604 | 586 | 0 |
| 571 | linear    | Ln(Rate) | Proportion of pregnancies with in-facility delivery, Proportion of deliveries with skilled birth attendants, Ln(Total fertility rate), Malnutrition (proportion of population >2SD under mean weight for age)                                                                                | 0.78438 | 596 | 0.31582 | 545 | 0 |
| 572 | linear    | Ln(Rate) | Age-specific fertility rate, Proportion of pregnancies with in-facility delivery, Education (mean years per capita), Ln(HIV death rate, females 15-49)                                                                                                                                       | 0.78032 | 583 | 0.31589 | 561 | 0 |
| 573 | linear    | Ln(Rate) | Proportion of deliveries with skilled birth attendants, Education (mean years per capita), Ln(HIV death rate, females 15-49)                                                                                                                                                                 | 0.78201 | 587 | 0.31587 | 557 | 0 |
| 574 | linear    | Ln(Rate) | Proportion of pregnancies with in-facility delivery, Proportion of deliveries with skilled birth attendants, Education (mean years per capita), Ln(HIV death rate, females 15-49)                                                                                                            | 0.78205 | 589 | 0.31587 | 556 | 0 |
| 575 | linear    | Ln(Rate) | Age-specific fertility rate, Proportion of pregnancies with in-facility delivery, Proportion of deliveries with skilled birth attendants, Malnutrition (proportion of population >2SD under mean weight for age), Ln(Lag distributed income per capita)                                      | 0.77905 | 571 | 0.31595 | 574 | 0 |



|     |        |          |                                                                                                                                                                                                                                                                          |         |     |         |     |   |
|-----|--------|----------|--------------------------------------------------------------------------------------------------------------------------------------------------------------------------------------------------------------------------------------------------------------------------|---------|-----|---------|-----|---|
| 576 | linear | Ln(Rate) | Proportion of deliveries with skilled birth attendants, Proportion of pregnancies with 4 antenatal care visits, Health system access (capped), Malnutrition (proportion of population >2SD under mean weight for age), Ln(Lag distributed income per capita)             | 0.77628 | 555 | 0.31605 | 591 | 0 |
| 577 | linear | Ln(Rate) | Age-specific fertility rate, Proportion of pregnancies with in-facility delivery, Proportion of deliveries with skilled birth attendants, Ln(Lag distributed income per capita)                                                                                          | 0.77964 | 576 | 0.31593 | 571 | 0 |
| 578 | linear | Ln(Rate) | Proportion of pregnancies with in-facility delivery, Proportion of deliveries with skilled birth attendants, Education (mean years per capita), Ln(HIV death rate, females 15-49), Proportion of pregnancies with 4 antenatal care visits, Health system access (capped) | 0.77702 | 559 | 0.31607 | 593 | 0 |
| 579 | linear | Ln(Rate) | Age-specific fertility rate, Proportion of deliveries with skilled birth attendants, Ln(Lag distributed income per capita)                                                                                                                                               | 0.78017 | 582 | 0.31594 | 572 | 0 |
| 580 | linear | Ln(Rate) | Proportion of pregnancies with in-facility delivery, Education (mean years per capita), Ln(HIV death rate, females 15-49)                                                                                                                                                | 0.78739 | 603 | 0.31584 | 551 | 0 |
| 581 | linear | Ln(Rate) | Proportion of pregnancies with in-facility delivery, Ln(Total fertility rate)                                                                                                                                                                                            | 0.78234 | 590 | 0.31591 | 565 | 0 |
| 582 | linear | Ln(Rate) | Proportion of pregnancies with in-facility delivery, Proportion of pregnancies with 4 antenatal care visits, Health system access (capped), Malnutrition (proportion of population >2SD under mean weight for age), Ln(Lag distributed income per capita)                | 0.77825 | 566 | 0.31608 | 595 | 0 |
| 583 | linear | Ln(Rate) | Proportion of pregnancies with in-facility delivery, Proportion of deliveries with skilled birth attendants, Ln(HIV death rate, females 15-49), Ln(Lag distributed income per capita)                                                                                    | 0.7882  | 609 | 0.31586 | 553 | 0 |
| 584 | linear | Ln(Rate) | Proportion of pregnancies with in-facility delivery, Proportion of deliveries with skilled birth attendants, Ln(HIV death rate, females 15-49), Malnutrition (proportion of population >2SD under mean weight for age), Ln(Lag distributed income per capita)            | 0.78237 | 591 | 0.31595 | 573 | 0 |
| 585 | linear | Ln(Rate) | Proportion of deliveries with skilled birth attendants, Ln(HIV death rate, females 15-49), Ln(Lag distributed income per capita)                                                                                                                                         | 0.78834 | 610 | 0.31586 | 555 | 0 |
| 586 | linear | Ln(Rate) | Age-specific fertility rate, Proportion of pregnancies with in-facility delivery, Ln(Lag distributed income per capita)                                                                                                                                                  | 0.78396 | 594 | 0.31596 | 577 | 0 |
| 587 | linear | Ln(Rate) | Education (mean years per capita), Ln(Lag distributed income per capita)                                                                                                                                                                                                 | 0.78442 | 597 | 0.31595 | 575 | 0 |
| 588 | linear | Ln(Rate) | Age-specific fertility rate, Ln(HIV death rate, females 15-49), Proportion of pregnancies with 4 antenatal care visits, Health system access (capped), Malnutrition (proportion of population >2SD under mean weight for age)                                            | 0.77637 | 556 | 0.31655 | 618 | 0 |
| 589 | linear | Ln(Rate) | Proportion of pregnancies with in-facility delivery, Proportion of deliveries with skilled birth attendants, Ln(Lag distributed income per capita)                                                                                                                       | 0.78701 | 599 | 0.31596 | 578 | 0 |

|     |        |          |                                                                                                                                                                                                                                                                                       |         |     |         |     |   |
|-----|--------|----------|---------------------------------------------------------------------------------------------------------------------------------------------------------------------------------------------------------------------------------------------------------------------------------------|---------|-----|---------|-----|---|
| 590 | linear | Ln(Rate) | Age-specific fertility rate, Proportion of pregnancies with in-facility delivery, Education (mean years per capita), Proportion of pregnancies with 4 antenatal care visits, Malnutrition (proportion of population >2SD under mean weight for age)                                   | 0.77953 | 573 | 0.31625 | 605 | 0 |
| 591 | linear | Ln(Rate) | Proportion of pregnancies with in-facility delivery, Proportion of deliveries with skilled birth attendants, Malnutrition (proportion of population >2SD under mean weight for age), Ln(Lag distributed income per capita)                                                            | 0.78403 | 595 | 0.31602 | 583 | 0 |
| 592 | linear | Ln(Rate) | Proportion of pregnancies with in-facility delivery, Ln(HIV death rate, females 15-49), Ln(Lag distributed income per capita)                                                                                                                                                         | 0.79251 | 620 | 0.31587 | 558 | 0 |
| 593 | linear | Ln(Rate) | Age-specific fertility rate, Ln(Total fertility rate)                                                                                                                                                                                                                                 | 0.80015 | 626 | 0.31584 | 552 | 0 |
| 594 | linear | Ln(Rate) | Proportion of deliveries with skilled birth attendants, Ln(Lag distributed income per capita)                                                                                                                                                                                         | 0.78715 | 600 | 0.31597 | 580 | 0 |
| 595 | linear | Ln(Rate) | Ln(Total fertility rate)                                                                                                                                                                                                                                                              | 0.79713 | 623 | 0.31588 | 559 | 0 |
| 596 | linear | Ln(Rate) | Proportion of pregnancies with in-facility delivery, Education (mean years per capita), Proportion of pregnancies with 4 antenatal care visits, Health system access (capped), Malnutrition (proportion of population >2SD under mean weight for age)                                 | 0.77965 | 577 | 0.3163  | 606 | 0 |
| 597 | linear | Ln(Rate) | Ln(HIV death rate, females 15-49), Proportion of pregnancies with 4 antenatal care visits, Health system access (capped), Malnutrition (proportion of population >2SD under mean weight for age)                                                                                      | 0.77862 | 567 | 0.31652 | 617 | 0 |
| 598 | linear | Ln(Rate) | Age-specific fertility rate, Education (mean years per capita), Proportion of pregnancies with 4 antenatal care visits, Health system access (capped), Malnutrition (proportion of population >2SD under mean weight for age)                                                         | 0.77957 | 575 | 0.31636 | 610 | 0 |
| 599 | linear | Ln(Rate) | Age-specific fertility rate, Proportion of pregnancies with in-facility delivery, Ln(HIV death rate, females 15-49), Proportion of pregnancies with 4 antenatal care visits, Health system access (capped), Malnutrition (proportion of population >2SD under mean weight for age)    | 0.7777  | 563 | 0.31659 | 622 | 0 |
| 600 | linear | Ln(Rate) | Proportion of deliveries with skilled birth attendants, Education (mean years per capita), Proportion of pregnancies with 4 antenatal care visits, Health system access (capped), Malnutrition (proportion of population >2SD under mean weight for age)                              | 0.78004 | 580 | 0.31631 | 607 | 0 |
| 601 | linear | Ln(Rate) | Education (mean years per capita), Proportion of pregnancies with 4 antenatal care visits, Health system access (capped), Malnutrition (proportion of population >2SD under mean weight for age)                                                                                      | 0.7801  | 581 | 0.31631 | 608 | 0 |
| 602 | linear | Ln(Rate) | Age-specific fertility rate, Proportion of deliveries with skilled birth attendants, Education (mean years per capita), Proportion of pregnancies with 4 antenatal care visits, Health system access (capped), Malnutrition (proportion of population >2SD under mean weight for age) | 0.77994 | 579 | 0.31636 | 611 | 0 |
| 603 | linear | Ln(Rate) | Proportion of pregnancies with in-facility delivery, Proportion of deliveries with skilled birth attendants, Education (mean years per capita), Health system access (capped), Malnutrition (proportion of population >2SD under mean weight for age)                                 | 0.78337 | 592 | 0.31623 | 603 | 0 |

|     |        |          |                                                                                                                                                                                                                                                                                       |         |     |         |     |   |
|-----|--------|----------|---------------------------------------------------------------------------------------------------------------------------------------------------------------------------------------------------------------------------------------------------------------------------------------|---------|-----|---------|-----|---|
| 604 | linear | Ln(Rate) | Proportion of pregnancies with in-facility delivery, Ln(Lag distributed income per capita)                                                                                                                                                                                            | 0.79125 | 619 | 0.31597 | 579 | 0 |
| 605 | linear | Ln(Rate) | Age-specific fertility rate, Proportion of deliveries with skilled birth attendants, Ln(HIV death rate, females 15-49), Proportion of pregnancies with 4 antenatal care visits, Health system access (capped), Malnutrition (proportion of population >2SD under mean weight for age) | 0.77968 | 578 | 0.31658 | 621 | 0 |
| 606 | linear | Ln(Rate) | Proportion of deliveries with skilled birth attendants, Ln(HIV death rate, females 15-49), Proportion of pregnancies with 4 antenatal care visits, Health system access (capped), Malnutrition (proportion of population >2SD under mean weight for age)                              | 0.78141 | 586 | 0.31655 | 619 | 0 |
| 607 | linear | Ln(Rate) | Proportion of pregnancies with in-facility delivery, Ln(HIV death rate, females 15-49), Proportion of pregnancies with 4 antenatal care visits, Health system access (capped), Malnutrition (proportion of population >2SD under mean weight for age)                                 | 0.78078 | 585 | 0.31657 | 620 | 0 |
| 608 | linear | Ln(Rate) | Age-specific fertility rate, Proportion of deliveries with skilled birth attendants, Education (mean years per capita)                                                                                                                                                                | 0.78741 | 604 | 0.31616 | 602 | 0 |
| 609 | linear | Ln(Rate) | Age-specific fertility rate, Proportion of pregnancies with in-facility delivery, Proportion of deliveries with skilled birth attendants, Education (mean years per capita)                                                                                                           | 0.78783 | 606 | 0.31615 | 601 | 0 |
| 610 | linear | Ln(Rate) | Proportion of pregnancies with in-facility delivery, Proportion of deliveries with skilled birth attendants, Education (mean years per capita)                                                                                                                                        | 0.78889 | 612 | 0.31611 | 597 | 0 |
| 611 | linear | Ln(Rate) | Proportion of pregnancies with in-facility delivery, Proportion of deliveries with skilled birth attendants, Education (mean years per capita), Proportion of pregnancies with 4 antenatal care visits, Health system access (capped)                                                 | 0.78507 | 598 | 0.31638 | 612 | 0 |
| 612 | linear | Ln(Rate) | Age-specific fertility rate, Education (mean years per capita), Ln(HIV death rate, females 15-49)                                                                                                                                                                                     | 0.79388 | 622 | 0.31604 | 589 | 0 |
| 613 | linear | Ln(Rate) | Proportion of pregnancies with in-facility delivery, Education (mean years per capita)                                                                                                                                                                                                | 0.79067 | 616 | 0.3161  | 596 | 0 |
| 614 | linear | Ln(Rate) | Age-specific fertility rate, Proportion of pregnancies with in-facility delivery, Education (mean years per capita)                                                                                                                                                                   | 0.78972 | 613 | 0.31614 | 600 | 0 |
| 615 | linear | Ln(Rate) | Proportion of deliveries with skilled birth attendants, Education (mean years per capita)                                                                                                                                                                                             | 0.78998 | 614 | 0.31612 | 599 | 0 |
| 616 | linear | Ln(Rate) | Age-specific fertility rate, Proportion of pregnancies with in-facility delivery, Proportion of deliveries with skilled birth attendants, Education (mean years per capita), Proportion of pregnancies with 4 antenatal care visits, Health system access (capped)                    | 0.78735 | 602 | 0.31643 | 615 | 0 |
| 617 | linear | Ln(Rate) | Age-specific fertility rate, Proportion of pregnancies with in-facility delivery, Education (mean years per capita), Proportion of pregnancies with 4 antenatal care visits, Health system access (capped)                                                                            | 0.78765 | 605 | 0.31645 | 616 | 0 |
| 618 | linear | Ln(Rate) | Education (mean years per capita), Ln(HIV death rate, females 15-49)                                                                                                                                                                                                                  | 0.80837 | 628 | 0.31612 | 598 | 0 |

|     |           |          |                                                                                                                                                                                                                                                     |         |     |         |     |   |
|-----|-----------|----------|-----------------------------------------------------------------------------------------------------------------------------------------------------------------------------------------------------------------------------------------------------|---------|-----|---------|-----|---|
| 619 | linear    | Ln(Rate) | Proportion of pregnancies with in-facility delivery, Proportion of pregnancies with 4 antenatal care visits, Health system access (capped), Malnutrition (proportion of population >2SD under mean weight for age)                                  | 0.78728 | 601 | 0.31678 | 626 | 0 |
| 620 | linear    | Ln(Rate) | Age-specific fertility rate, Ln(HIV death rate, females 15-49), Ln(Lag distributed income per capita)                                                                                                                                               | 0.79784 | 625 | 0.31624 | 604 | 0 |
| 621 | linear    | Ln(Rate) | Proportion of deliveries with skilled birth attendants, Proportion of pregnancies with 4 antenatal care visits, Health system access (capped), Malnutrition (proportion of population >2SD under mean weight for age)                               | 0.78812 | 608 | 0.31678 | 625 | 0 |
| 622 | linear    | Ln(Rate) | Age-specific fertility rate, Education (mean years per capita)                                                                                                                                                                                      | 0.8075  | 627 | 0.31635 | 609 | 0 |
| 623 | linear    | Ln(Rate) | Age-specific fertility rate, Proportion of pregnancies with in-facility delivery, Proportion of pregnancies with 4 antenatal care visits, Health system access (capped), Malnutrition (proportion of population >2SD under mean weight for age)     | 0.78805 | 607 | 0.31681 | 629 | 0 |
| 624 | linear    | Ln(Rate) | Age-specific fertility rate, Ln(Lag distributed income per capita)                                                                                                                                                                                  | 0.79776 | 624 | 0.31639 | 613 | 0 |
| 625 | linear    | Ln(Rate) | Age-specific fertility rate, Proportion of deliveries with skilled birth attendants, Proportion of pregnancies with 4 antenatal care visits, Health system access (capped), Malnutrition (proportion of population >2SD under mean weight for age)  | 0.78887 | 611 | 0.3168  | 628 | 0 |
| 626 | spacetime | Ln(Rate) | Age-specific fertility rate, Ln(HIV death rate, females 15-49)                                                                                                                                                                                      | 0.79108 | 617 | 0.31666 | 624 | 0 |
| 627 | spacetime | Ln(Rate) | Age-specific fertility rate                                                                                                                                                                                                                         | 0.7936  | 621 | 0.3166  | 623 | 0 |
| 628 | linear    | Ln(Rate) | Age-specific fertility rate, Proportion of pregnancies with 4 antenatal care visits, Health system access (capped), Malnutrition (proportion of population >2SD under mean weight for age)                                                          | 0.79115 | 618 | 0.31678 | 627 | 0 |
| 629 | linear    | Ln(Rate) | Education (mean years per capita)                                                                                                                                                                                                                   | 0.81946 | 632 | 0.3164  | 614 | 0 |
| 630 | linear    | Ln(Rate) | Proportion of pregnancies with in-facility delivery, Proportion of deliveries with skilled birth attendants, Ln(HIV death rate, females 15-49), Malnutrition (proportion of population >2SD under mean weight for age)                              | 0.81556 | 630 | 0.3169  | 631 | 0 |
| 631 | linear    | Ln(Rate) | Age-specific fertility rate, Proportion of pregnancies with in-facility delivery, Proportion of deliveries with skilled birth attendants, Ln(HIV death rate, females 15-49), Malnutrition (proportion of population >2SD under mean weight for age) | 0.81061 | 629 | 0.31693 | 632 | 0 |
| 632 | linear    | Ln(Rate) | Age-specific fertility rate, Proportion of pregnancies with in-facility delivery, Proportion of deliveries with skilled birth attendants, Malnutrition (proportion of population >2SD under mean weight for age)                                    | 0.8178  | 631 | 0.317   | 634 | 0 |
| 633 | linear    | Ln(Rate) | Proportion of pregnancies with in-facility delivery, Proportion of deliveries with skilled birth attendants, Malnutrition (proportion of population >2SD under mean weight for age)                                                                 | 0.82104 | 633 | 0.31696 | 633 | 0 |

|     |           |          |                                                                                                                                                                             |         |     |         |     |   |
|-----|-----------|----------|-----------------------------------------------------------------------------------------------------------------------------------------------------------------------------|---------|-----|---------|-----|---|
| 634 | linear    | Ln(Rate) | Age-specific fertility rate, Proportion of deliveries with skilled birth attendants, Ln(HIV death rate, females 15-49)                                                      | 0.82199 | 634 | 0.31722 | 637 | 0 |
| 635 | linear    | Ln(Rate) | Age-specific fertility rate, Proportion of pregnancies with in-facility delivery, Proportion of deliveries with skilled birth attendants, Ln(HIV death rate, females 15-49) | 0.83092 | 636 | 0.31721 | 636 | 0 |
| 636 | spacetime | Ln(Rate) | Ln(HIV death rate, females 15-49)                                                                                                                                           | 0.83524 | 639 | 0.31704 | 635 | 0 |
| 637 | linear    | Ln(Rate) | Ln(HIV death rate, females 15-49), Ln(Lag distributed income per capita)                                                                                                    | 0.84544 | 645 | 0.31688 | 630 | 0 |
| 638 | linear    | Ln(Rate) | Age-specific fertility rate, Proportion of deliveries with skilled birth attendants                                                                                         | 0.82541 | 635 | 0.31735 | 643 | 0 |
| 639 | linear    | Ln(Rate) | Age-specific fertility rate, Proportion of pregnancies with in-facility delivery, Proportion of deliveries with skilled birth attendants                                    | 0.83135 | 637 | 0.31735 | 642 | 0 |
| 640 | linear    | Ln(Rate) | Proportion of deliveries with skilled birth attendants, Ln(HIV death rate, females 15-49)                                                                                   | 0.84013 | 642 | 0.31722 | 638 | 0 |
| 641 | linear    | Ln(Rate) | Proportion of deliveries with skilled birth attendants                                                                                                                      | 0.83948 | 641 | 0.31732 | 640 | 0 |
| 642 | linear    | Ln(Rate) | Age-specific fertility rate, Proportion of pregnancies with in-facility delivery, Ln(HIV death rate, females 15-49)                                                         | 0.83326 | 638 | 0.31745 | 644 | 0 |
| 643 | linear    | Ln(Rate) | Proportion of pregnancies with in-facility delivery, Proportion of deliveries with skilled birth attendants, Ln(HIV death rate, females 15-49)                              | 0.84479 | 644 | 0.31722 | 639 | 0 |
| 644 | linear    | Ln(Rate) | Proportion of pregnancies with in-facility delivery, Proportion of deliveries with skilled birth attendants                                                                 | 0.84405 | 643 | 0.31733 | 641 | 0 |
| 645 | linear    | Ln(Rate) | Age-specific fertility rate, Proportion of pregnancies with in-facility delivery                                                                                            | 0.83735 | 640 | 0.31758 | 646 | 0 |
| 646 | linear    | Ln(Rate) | Proportion of pregnancies with in-facility delivery, Ln(HIV death rate, females 15-49)                                                                                      | 0.84883 | 646 | 0.31751 | 645 | 0 |
| 647 | linear    | Ln(Rate) | Proportion of pregnancies with in-facility delivery                                                                                                                         | 0.851   | 647 | 0.31758 | 647 | 0 |
| 648 | linear    | Ln(Rate) | Age-specific fertility rate, Ln(HIV death rate, females 15-49)                                                                                                              | 0.88893 | 648 | 0.31824 | 648 | 0 |
| 649 | linear    | Ln(Rate) | Age-specific fertility rate                                                                                                                                                 | 0.88985 | 649 | 0.31839 | 649 | 0 |
| 650 | linear    | Ln(Rate) | Ln(HIV death rate, females 15-49)                                                                                                                                           | 0.96679 | 650 | 0.31915 | 650 | 0 |

Appendix Table 6: Data sources used in DisMod

| <b>Appendix Table 6: Maternal mortality data sources used in the GBD 2013 DisMod</b>                                                                                                                                                                                                                                                                                                                                                                                                                                     |  |
|--------------------------------------------------------------------------------------------------------------------------------------------------------------------------------------------------------------------------------------------------------------------------------------------------------------------------------------------------------------------------------------------------------------------------------------------------------------------------------------------------------------------------|--|
| <b>Source</b>                                                                                                                                                                                                                                                                                                                                                                                                                                                                                                            |  |
| <b>Maternal Aetiologies</b>                                                                                                                                                                                                                                                                                                                                                                                                                                                                                              |  |
| Abouchadi S, Belghiti Alaoui A, Meski FZ, De Brouwere V. Implementing a maternal mortality surveillance system in Morocco - challenges and opportunities. <i>Trop Med Int Health</i> . 2013; 18(3): 357-65.                                                                                                                                                                                                                                                                                                              |  |
| Ali AAA, Adam I. Lack of antenatal care, education, and high maternal mortality in Kassala hospital, eastern Sudan during 2005-2009. <i>J. Matern. Fetal. Neonatal. Med.</i> 2011; 24(8): 1077-8.                                                                                                                                                                                                                                                                                                                        |  |
| Almerie MQ, Matar HE, Almerie Y. A 20-year (1989-2008) audit of maternal mortality in Damascus, Syria. <i>Int J Gynaecol Obstet.</i> 2011; 112(1): 70-1.                                                                                                                                                                                                                                                                                                                                                                 |  |
| Almerie Y, Almerie MQ, Matar HE, Shahrour Y, Al Chamat AA, Abdulsalam A. Obstetric near-miss and maternal mortality in maternity university hospital, Damascus, Syria: a retrospective study. <i>BMC Pregnancy Childbirth.</i> 2010; 65.                                                                                                                                                                                                                                                                                 |  |
| Amarin Z, Khader Y, Okour A, Jaddou H, Al-Qutob R. National maternal mortality ratio for Jordan, 2007-2008. <i>Int J Gynaecol Obstet.</i> 2010; 111(2): 152-6.                                                                                                                                                                                                                                                                                                                                                           |  |
| Ande A, Olagbuji B, Ezeanochie M. An audit of maternal deaths from a referral university teaching hospital in Nigeria: the emergence of HIV/AIDS as a leading cause. <i>Niger Postgrad Med J.</i> 2012; 19(2): 83-7.                                                                                                                                                                                                                                                                                                     |  |
| Andersen BR, Westergaard HB, Bødker B, Weber T, Møller M, Sørensen JL. Maternal mortality in Denmark, 1985-1994. <i>Eur J Obstet Gynecol Reprod Biol.</i> 2009; 142(2): 124-8                                                                                                                                                                                                                                                                                                                                            |  |
| Asamoah BO, Moussa KM, Stafström M, Musinguzi G. Distribution of causes of maternal mortality among different socio-demographic groups in Ghana; a descriptive study. <i>BMC Public Health.</i> 2011; 159.                                                                                                                                                                                                                                                                                                               |  |
| Australia Vital Registration - Deaths 2005.                                                                                                                                                                                                                                                                                                                                                                                                                                                                              |  |
| Australian Institute of Health and Welfare. Australia Maternal Deaths 2003-2005. Canberra, Australia: Australian Institute of Health and Welfare, 2008.                                                                                                                                                                                                                                                                                                                                                                  |  |
| Bashour H, Abdulsalam A, Jabr A, Cheikha S, Tabbaa M, Lahham M, Dihman R, Khadra M, Campbell OMR. Maternal mortality in Syria: causes, contributing factors and preventability. <i>Trop Med Int Health.</i> 2009; 14(9): 1122-7.                                                                                                                                                                                                                                                                                         |  |
| Berg CJ, Callaghan WM, Syverson C, Henderson Z. Pregnancy-related mortality in the United States, 1998 to 2005. <i>Obstet Gynecol.</i> 2010; 116(6): 1302-9                                                                                                                                                                                                                                                                                                                                                              |  |
| Births and Deaths Registry (Ghana). Ghana - Accra Births and Deaths Registry - Deaths 2000-2007.                                                                                                                                                                                                                                                                                                                                                                                                                         |  |
| Bødker B, Hvidman L, Weber T, Møller M, Aarre A, Nielsen KM, Sørensen JL. Maternal deaths in Denmark 2002-2006. <i>Acta Obstet Gynecol Scand.</i> 2009; 88(5): 556-62.                                                                                                                                                                                                                                                                                                                                                   |  |
| Bouvier-Colle M-H, Mohangoo AD, Gissler M, Novak-Antolic Z, Vutuc C, Szamotulska K, Zeitlin J, Euro-Peristat Scientific Committee. What about the mothers? An analysis of maternal mortality and morbidity in perinatal health surveillance systems in Europe. <i>BJOG.</i> 2012; 119(7): 880-90.                                                                                                                                                                                                                        |  |
| Brazil Deaths Data 1990-2009.                                                                                                                                                                                                                                                                                                                                                                                                                                                                                            |  |
| Cantwell R, Clutton-Brock T, Cooper G, Dawson A, Drife J, Garrod D, Harper A, Hulbert D, Lucas S, McClure J, Millward-Sadler H, Neilson J, Nelson-Piercy C, Norman J, O'Herlihy C, Oates M, Shakespeare J, de Swiet M, Williamson C, Beale V, Knight M, Lennox C, Miller A, Parmar D, Rogers J, Springett A. Saving Mothers' Lives: Reviewing maternal deaths to make motherhood safer: 2006-2008. The Eighth Report of the Confidential Enquiries into Maternal Deaths in the United Kingdom. <i>BJOG.</i> 2011; 1-203. |  |
| Central Civil Registry Bureau (Suriname). Suriname Vital Statistics - Deaths 2007.                                                                                                                                                                                                                                                                                                                                                                                                                                       |  |

Central Statistical Office (Trinidad and Tobago). Trinidad and Tobago Vital Statistics - Deaths 2003-2004.

Chauhan P, Chauhan VKS, Shrivastava P. Maternal mortality among tribal women at a tertiary level of care in Bastar, Chhattisgarh. *Glob J Health Sci.* 2012; 4(2): 132-41.

Chibber R, Al-Hijji J, Al-Adwani AR, Rammah A, Fouda M, Al-Saleh E, Tasneem MA. Trends in maternal mortality over 29 years in a Kuwait Tertiary Teaching Hospital: signs of progress?. *J. Matern. Fetal. Neonatal. Med.* 2012; 25(9): 1557-63.

China National Maternal and Child Health Surveillance System Maternal Mortality By Cause 1996-2005 - MCHS.

Chinese Center for Disease Control and Prevention (CCDC). China Disease Surveillance Points 2004 - China CDC.

Chinese Center for Disease Control and Prevention (CCDC). China Disease Surveillance Points 2005 - China CDC.

Chinese Center for Disease Control and Prevention (CCDC). China Disease Surveillance Points 2006 - China CDC.

Chinese Center for Disease Control and Prevention (CCDC). China Disease Surveillance Points 2007 - China CDC.

Chinese Center for Disease Control and Prevention (CCDC). China Disease Surveillance Points 2008 - China CDC.

Chinese Center for Disease Control and Prevention (CCDC). China Disease Surveillance Points 2009 - China CDC.

Chinese Center for Disease Control and Prevention (CCDC). China Disease Surveillance Points 2010 - China CDC.

Chinese Center for Disease Control and Prevention (CCDC). China Disease Surveillance Points 2011 - China CDC.

Chinese Center for Disease Control and Prevention (CCDC). China Disease Surveillance Points 2012 - China CDC.

Chinese Center for Disease Control and Prevention (CCDC). China National Maternal and Child Health Surveillance System Maternal Mortality By Cause 2006-2012 - MCHS.

De Graaf JP, Schutte JM, Poeran JJ, van Roosmalen J, Bonse GJ, Steegers EAP. Regional differences in Dutch maternal mortality. *BJOG.* 2012; 119(5): 582-8.

Debuur C, Welaga P, Wak G, Hodgson A. Self-reported health and functional limitations among older people in the Kassena-Nankana District, Ghana. *Glob Health Action.* 2010; 3(Supp. 2): 54-63.

Department of Health (Taiwan). Taiwan Statistics of Causes of Death 2008.

Department of Health (Taiwan). Taiwan Statistics of Causes of Death 2009.

Department of Health (Taiwan). Taiwan Statistics of Causes of Death 2010.

Department of Health (Taiwan). Taiwan Statistics of Causes of Death 2011.

Department of Health (Taiwan). Taiwan Statistics of Causes of Death 2012.

Department of Health (Taiwan). Taiwan Vital Statistics - Deaths 2007.

Department of Home Affairs (South Africa), Statistics South Africa. South Africa Mortality and Causes of Death 1997-2005. Pretoria, South Africa: Statistics South Africa.

Department of Statistics (Malaysia). Malaysia - Peninsular Vital Statistics - Deaths 1998.

Donati S, Senatore S, Ronconi A, Regional maternal mortality working group. Maternal mortality in Italy: a record-linkage study. *BJOG.* 2011; 118(7): 872-9.

Du L, Qin M, Zhang L, Xu H, Zhu L. Trends in maternal mortality in resident vs. migrant women in Shanghai, China, 2000-2009: a register-based analysis. *Reprod Health Matters.* 2012; 20(39): 73-80.

Elhassan EM, Mirghani OA, Adam I. High maternal mortality and stillbirth in the Wad Medani Hospital, Central Sudan, 2003-2007. *Trop Doct.* 2009; 39(4): 238-9.

Ezugwu EC, Onah HE, Ezugwu FO, Okafor II. Maternal mortality in a transitional hospital in Enugu, south east Nigeria. *Afr J Reprod Health.* 2009; 13(4): 67-72.

- Farquhar C, Sadler L, Masson V, Bohm G, Haslam A. Beyond the numbers: classifying contributory factors and potentially avoidable maternal deaths in New Zealand, 2006-2009. *Am J Obstet Gynecol.* 2011; 205(4): 331e1-8.
- Fässler M, Zimmermann R, QuackLöttscher KC. Maternal mortality in Switzerland 1995-2004. *Swiss Med Wkly.* 2010; 140(1-2): 25-30.
- Fawad A, Naz H, Islam A, Zaffar S, Abbasi A-N. Maternal mortality in a tertiary care hospital. *J Ayub Med Coll Abbottabad.* 2011; 23(1): 92-5.
- Feng XL, Zhu J, Zhang L, Song L, Hipgrave D, Guo S, Ronsmans C, Guo Y, Yang Q. Socio-economic disparities in maternal mortality in China between 1996 and 2006. *BJOG.* 2010; 117(12): 1527-36.
- Ganyaglo GYK, Hill WC. A 6-year (2004-2009) review of maternal mortality at the Eastern Regional Hospital, Koforidua, Ghana. *Semin. Perinatol.* 2012; 36(1): 79-83.
- Garba JA, Umar S. Aetiology of maternal mortality using verbal autopsy at Sokoto, North-Western Nigeria. *Afr J Prim Health Care Fam Med.* 2013; 5(1).
- Garba M, Nayama M, Alio AP, Holloway ML, Hamisu BS, Salihu HM. Maternal mortality in Niger: a retrospective study in a high risk maternity. *Afr J Med Med Sci.* 2011; 40(4): 393-7.
- Ghana Statistical Service, Ghana Health Service, Macro International, Inc. Ghana Special Demographic and Health Survey 2007-2008. Calverton, United States: Macro International, Inc., 2010.
- Ghazal-Aswad S, Badrinath P, Sidky I, Abdul-Razak Y, Davison J, Mirghani HM. Confidential enquiries into maternal mortality in the United Arab Emirates: a feasibility study. *J. Obstet. Gynaecol. Res.* 2011; 37(3): 209-14.
- Gomes MC, Ventura MT, Nunes RS. How many maternal deaths are there in Portugal?. *J. Matern. Fetal. Neonatal. Med.* 2012; 25(10): 1975-9.
- Gumanga SK, Kolbila DZ, Gandau BBN, Munkaila A, Malechi H, Kyei-Aboagye K. Trends in maternal mortality in Tamale Teaching Hospital, Ghana. *Ghana Med J.* 2011; 45(3): 105-10.
- Hospital Mortality Data 2002-2007.
- Huda FA, Ahmed A, Dasgupta SK, Jahan M, Ferdous J, Koblinsky M, Ronsmans C, Chowdhury ME. Profile of maternal and foetal complications during labour and delivery among women giving birth in hospitals in Matlab and Chandpur, Bangladesh. *J Health Popul Nutr.* 2012; 30(2): 131-42.
- Hudić I, Radončić F, Fatušić Z. Incidence and causes of maternal death during 20-year period (1986-2005) in Tuzla Canton, Bosnia and Herzegovina. *J Matern Fetal Neonatal Med.* 2011; 24(10): 1286-8.
- Igwegbe AO, Eleje GU, Ugboaja JO, Ofiaeli RO. Improving maternal mortality at a university teaching hospital in Nnewi, Nigeria. *Int J Gynaecol Obstet.* 2012; 116(3): 197-200.
- INDEPTH. Tanzania - Ifakara Health and Demographic Surveillance System.
- Institute of Health Systems (India). India Cause of Death Dataset Version 1.3 1990-1998.
- Iyengar K, Iyengar SD, Suhalka V, Dashora K. Pregnancy-related deaths in rural Rajasthan, India: exploring causes, context, and care-seeking through verbal autopsy. *J Health Popul Nutr.* 2009; 27(2): 293-302.
- Jain A, Gupta SC, Misra SK, Singh R, Bhagoliwal AK, Kaushal SK. Trend and causes of maternal mortality among women delivering in S. N. Medical College Hospital, Agra. *Indian J Public Health.* 2009; 53(1): 47-8.
- Joshi A, Shah D, Panchabhai T, Patil P. An autopsy study of maternal mortality: A tertiary healthcare perspective. *Journal of Postgraduate Medicine.* 2009; 55(1): 8.
- Kale PL, Costa AJL. Maternal deaths in the city of Rio de Janeiro, Brazil, 2000-2003. *J Health Popul Nutr.* 2009; 27(6): 794-801.
- Kilpatrick SJ, Prentice P, Jones RL, Geller S. Reducing maternal deaths through state maternal mortality review. *J Womens Health (Larchmt).* 2012; 21(9): 905-9.
- Koch E, Thorp J, Bravo M, Gatica S, Romero CX, Aguilera H, Ahlers I. Women's education level, maternal health facilities, abortion legislation and maternal deaths: a natural experiment in Chile from 1957 to 2007. *PLoS One.* 2012; 7(5): e36613.
- Kongnyuy EJ, Mlava G, van den Broek N. Facility-based maternal death review in three districts in the central region of Malawi: an analysis of causes and characteristics of maternal deaths. *Womens Health Issues.* 2009; 19(1): 14-20.



Kullima AA, Kawuwa MB, Audu BM, Geidam AD, Mairiga AG. Trends in maternal mortality in a tertiary institution in Northern Nigeria. *Ann Afr Med.* 2009; 8(4): 221-4.

Kwawununu FK, Morhe ESK, Konney TO. Trends in maternal mortality at Komfo Anokye Teaching Hospital, Kumasi, Ghana, between 1998 and 2007. *Int J Gynaecol Obstet.* 2012; 117(2): 183-4.

Lee QY, Odoi AT, Opare-Addo H, Dassah ET. Maternal mortality in Ghana: a hospital-based review. *Acta Obstet Gynecol Scand.* 2012; 91(1): 87-92.

Liang J, Zhu J, Dai L, Li X, Li M, Wang Y. Maternal mortality in China, 1996-2005. *Int J Gynaecol Obstet.* 2010; 110(2): 93-6.

Lori JR, Starke AE. A critical analysis of maternal morbidity and mortality in Liberia, West Africa. *Midwifery.* 2012; 28(1): 67-72.

Mairiga AG, Saleh W. Maternal mortality at the State Specialist Hospital Bauchi, Northern Nigeria. *East Afr Med J.* 2009; 86(1): 25-30.

Manhica Health Research Center (CISM). Mozambique Manhica Health Research Centre Activity Report 2009-2010. 2011.

Mbassi SM, Mbu R, Bouvier-Colle MH. Use of routinely collected data to assess maternal mortality in seven tertiary maternity centers in Cameroon. *Int J Gynaecol Obstet.* 2011; 115(3): 240-3.

Ministry of Health (Chile), National Institute of Statistics (Chile). Chile Vital Registration - Deaths 1985.

Ministry of Health (Jordan). Jordan Vital Registration - Deaths 2004-2006.

Ministry of Health (Jordan). Jordan Vital Registration - Deaths 2010.

Ministry of Health (Mexico), National Institute of Statistics and Geography (Mexico). Mexico Vital Registration - Deaths 1979.

Ministry of Health (Mexico), National Institute of Statistics and Geography (Mexico). Mexico Vital Registration - Deaths 1980.

Ministry of Health (Mexico), National Institute of Statistics and Geography (Mexico). Mexico Vital Registration - Deaths 1981.

Ministry of Health (Mexico), National Institute of Statistics and Geography (Mexico). Mexico Vital Registration - Deaths 1982.

Ministry of Health (Mexico), National Institute of Statistics and Geography (Mexico). Mexico Vital Registration - Deaths 1983.

Ministry of Health (Mexico), National Institute of Statistics and Geography (Mexico). Mexico Vital Registration - Deaths 1984.

Ministry of Health (Mexico), National Institute of Statistics and Geography (Mexico). Mexico Vital Registration - Deaths 1985.

Ministry of Health (Mexico), National Institute of Statistics and Geography (Mexico). Mexico Vital Registration - Deaths 1986.

Ministry of Health (Mexico), National Institute of Statistics and Geography (Mexico). Mexico Vital Registration - Deaths 1987.

Ministry of Health (Mexico), National Institute of Statistics and Geography (Mexico). Mexico Vital Registration - Deaths 1988.

Ministry of Health (Mexico), National Institute of Statistics and Geography (Mexico). Mexico Vital Registration - Deaths 1989.

Ministry of Health (Mexico), National Institute of Statistics and Geography (Mexico). Mexico Vital Registration - Deaths 1990.

Ministry of Health (Mexico), National Institute of Statistics and Geography (Mexico). Mexico Vital Registration - Deaths 1991.

Ministry of Health (Mexico), National Institute of Statistics and Geography (Mexico). Mexico Vital Registration - Deaths 1992.

Ministry of Health (Mexico), National Institute of Statistics and Geography (Mexico). Mexico Vital Registration - Deaths 1993.

Ministry of Health (Mexico), National Institute of Statistics and Geography (Mexico). Mexico Vital Registration - Deaths 1994.

Ministry of Health (Mexico), National Institute of Statistics and Geography (Mexico). Mexico Vital Registration - Deaths 1995.

Ministry of Health (Mexico), National Institute of Statistics and Geography (Mexico). Mexico Vital Registration - Deaths 1996.

Ministry of Health (Mexico), National Institute of Statistics and Geography (Mexico). Mexico Vital Registration - Deaths 1997.

Ministry of Health (Mexico), National Institute of Statistics and Geography (Mexico). Mexico Vital Registration - Deaths 1998.

Ministry of Health (Mexico), National Institute of Statistics and Geography (Mexico). Mexico Vital Registration - Deaths 1999.

Ministry of Health (Mexico), National Institute of Statistics and Geography (Mexico). Mexico Vital Registration - Deaths 2000.

Ministry of Health (Mexico), National Institute of Statistics and Geography (Mexico). Mexico Vital Registration - Deaths 2001.

Ministry of Health (Mexico), National Institute of Statistics and Geography (Mexico). Mexico Vital Registration - Deaths 2002.

Ministry of Health (Mexico), National Institute of Statistics and Geography (Mexico). Mexico Vital Registration - Deaths 2003.

Ministry of Health (Mexico), National Institute of Statistics and Geography (Mexico). Mexico Vital Registration - Deaths 2004.

Ministry of Health (Mexico), National Institute of Statistics and Geography (Mexico). Mexico Vital Registration - Deaths 2005.

Ministry of Health (Mexico), National Institute of Statistics and Geography (Mexico). Mexico Vital Registration - Deaths 2006.

Ministry of Health (Mexico), National Institute of Statistics and Geography (Mexico). Mexico Vital Registration - Deaths 2007.

Ministry of Health (Mexico), National Institute of Statistics and Geography (Mexico). Mexico Vital Registration - Deaths 2008.

Ministry of Health (Mexico), National Institute of Statistics and Geography (Mexico). Mexico Vital Registration - Deaths 2010.

Ministry of Health (Mexico), National Institute of Statistics and Geography (Mexico). Mexico Vital Registration - Deaths 2011.

Ministry of Health (Saudi Arabia). Saudi Arabia Vital Registration - Deaths 1996-2011.

Ministry of Health (Saudi Arabia). Saudi Arabia Vital Registration - Deaths 2008-2011.

Ministry of Health (Saudi Arabia). Saudi Arabia Vital Registration - Deaths 2012.

Ministry of Health and Medical Education (Iran). Iran Vital Registration - Deaths 2007.

Ministry of Health and Medical Education (Iran). Iran Vital Registration - Deaths 2008.

Ministry of Health and Medical Education (Iran). Iran Vital Registration - Deaths 2009.

Ministry of Health and Medical Education (Iran). Iran Vital Registration - Deaths 2010.

Ministry of Health and Medical Education (Iran). Iran Vital Statistics - Deaths 2000-2006.

Ministry of Health and Social Improvement (Antigua and Barbuda). Antigua and Barbuda Vital Statistics - Deaths 1996-1999.

Ministry of Public Health (Thailand). Thailand Burden of Disease and Injuries 1998-1999.

Ministry of Public Health and Social Assistance (Dominican Republic), National Statistics Office (Dominican Republic). Dominican Republic Vital Statistics - Deaths 2006-2009.

Mohammed AA, Elnour MH, Mohammed EE, Ahmed SA, Abdelfattah AI. Maternal mortality in Kassala State - Eastern Sudan: community-based study using Reproductive age mortality survey (RAMOS). BMC Pregnancy Childbirth. 2011; 11(1): 102.

Montgomery AL, Ram U, Kumar R, Jha P, Bhutta Z. Maternal Mortality in India: Causes and Healthcare Service Use Based on a Nationally Representative Survey. PLoS One. 2014; 9(1): e83331.

National Administrative Department of Statistics (Colombia). Colombia Vital Statistics - Deaths 2008. Bogotá, Colombia: National Administrative Department of Statistics (Colombia).

National Institute of Statistics and Geography (Mexico). Mexico Vital Registration - Deaths 2012.

National Institute of Statistics and Geography (Mexico). Mexico Vital Statistics - Deaths 2009.

National Records of Scotland. United Kingdom - Scotland Vital Events Reference Tables 2011. Edinburgh, Scotland: National Records of Scotland.

National Records of Scotland. United Kingdom - Scotland Vital Events Reference Tables 2012. Edinburgh, Scotland: National Records of Scotland.

National Statistics Office (Philippines). Philippines Vital Statistics - Deaths 1990-2005.

Nielsen HS, Lindberg L, Nygaard U, Aytenfisu H, Johnston OL, Sørensen B, Rudnicki M, Crangle M, Lawson R, Duffy S. A community-based long-term follow up of women undergoing obstetric fistula repair in rural Ethiopia. *BJOG*. 2009; 116(9): 1258-64.

Nisar N, Sohoo NA. Maternal mortality in rural community: a challenge for achieving millennium development goal. *J Pak Med Assoc*. 2010; 60(1): 20-4.

Northern Ireland Statistics and Research Agency (NISRA). United Kingdom - Northern Ireland Registrar General Annual Report 2011. Belfast, Northern Ireland: Northern Ireland Statistics and Research Agency (NISRA), 2012.

Nwagha UI, Nwachukwu D, Dim C, Ibekwe PC, Onyebuchi A. Maternal mortality trend in South East Nigeria: less than a decade to the millennium developmental goals. *J Womens Health (Larchmt)*. 2010; 19(2): 323-7.

Office for National Statistics (United Kingdom). United Kingdom - England and Wales Mortality Data 1981-1994. Newport, United Kingdom: Office for National Statistics (United Kingdom).

Office for National Statistics (United Kingdom). United Kingdom - England and Wales Mortality Data 1995-2000. Newport, United Kingdom: Office for National Statistics (United Kingdom).

Office for National Statistics (United Kingdom). United Kingdom - England and Wales Mortality Data 2001-2012. Newport, United Kingdom: Office for National Statistics (United Kingdom).

Office of the Registrar General & Census Commissioner (India). India Vital Statistics 1980. New Delhi, India: Office of the Registrar General & Census Commissioner (India).

Office of the Registrar General & Census Commissioner (India). India Vital Statistics 1981. New Delhi, India: Office of the Registrar General & Census Commissioner (India).

Office of the Registrar General & Census Commissioner (India). India Vital Statistics 1982. New Delhi, India: Office of the Registrar General & Census Commissioner (India).

Office of the Registrar General & Census Commissioner (India). India Vital Statistics 1983. New Delhi, India: Office of the Registrar General & Census Commissioner (India).

Office of the Registrar General & Census Commissioner (India). India Vital Statistics 1986. New Delhi, India: Office of the Registrar General & Census Commissioner (India).

Office of the Registrar General & Census Commissioner (India). India Vital Statistics 1987. New Delhi, India: Office of the Registrar General & Census Commissioner (India).

Office of the Registrar General & Census Commissioner (India). India Vital Statistics 1988. New Delhi, India: Office of the Registrar General & Census Commissioner (India).

Office of the Registrar General & Census Commissioner (India). India Vital Statistics 1989. New Delhi, India: Office of the Registrar General & Census Commissioner (India).

Office of the Registrar General and Census Commissioner (India). India MCCD Vital Statistics - Deaths 1990-1998.

Olamijulo JA, Olorunfemi G, Olaleye O, Ogedengbe OK, Giwa-Osagie OF. Trends in maternal mortality at the Lagos University Teaching Hospital, Lagos, Nigeria. *Nig Q J Hosp Med*. 2012; 22(2): 72-9.

Pepall J. Making Plans for Success- The Tanzania Essential Health Interventions Project.

Peru Vital Statistics - Deaths 2001-2006.

Petronijevic M, Vrzic-Petronijevic S, Ivanovic I, Krstic M, Bratic D. Maternal mortality in Serbia. *Clin Exp Obstet Gynecol*. 2013; 40(2): 236-7.

Ps R, Verma S, Rai L, Kumar P, Pai MV, Shetty J. "Near miss" obstetric events and maternal deaths in a tertiary care hospital: an audit. *J Pregnancy*. 2013; 393758.

Puri A, Yadav I, Jain N. Maternal mortality in an urban tertiary care hospital of north India. *J Obstet Gynaecol India*. 2011; 61(3): 280-5.

Rana A, Pradhan N, Manandhar B, Bitsta KD, Adhikari S, Gurung G, Amatya A. Maternal mortality over the last decade: a changing pattern of death due to alarming rise in hepatitis in the latter five-year period. *J Obstet. Gynaecol. Res*. 2009; 35(2): 243-51.

Ray S, Madzimbamuto FD, Ramagola-Masire D, Phillips R, Mogobe KD, Haverkamp M, Mokatedi M, Motana M. Review of causes of maternal deaths in Botswana in 2010. *S Afr Med J*. 2013; 103(8): 537-42.

Registrar General's Department (Sri Lanka). Sri Lanka Vital Statistics - Deaths 1979.

Registrar General's Department (Sri Lanka). Sri Lanka Vital Statistics - Deaths 1993-1996.

Registrar General's Department (Sri Lanka). Sri Lanka Vital Statistics - Deaths 2004-2005.

Registrar General's Department (Zimbabwe), Zimbabwe National Statistics Agency. Zimbabwe Mortality Report 2007.

Ronsmans C, Scott S, Adisasmita A, Deviany P, Nandiaty F. Estimation of population-based incidence of pregnancy-related illness and mortality (PRIAM) in two districts in West Java, Indonesia. *BJOG*. 2009; 116(1): 82-90.

Rosenstein MG, Romero M, Ramos S. Maternal Mortality in Argentina: A Closer Look at Women Who Die Outside of the Health System. *Matern Child Health J*. 12(4): 519-24.

Russia Mortality Data 2012

Saleh WF, Ragab WS, Aboulgheit SS. Audit of maternal mortality ratio and causes of maternal deaths in the largest maternity hospital in Cairo, Egypt (Kasr Al Aini) in 2008 and 2009: lessons learned. *Afr J Reprod Health*. 2013; 17(3): 105-9.

Sanga K, de Costa C, Mola G. A review of maternal deaths at Goroka General Hospital, Papua New Guinea 2005-2008. *Aust N Z J Obstet Gynaecol*. 2010; 50(1): 21-4.

Santana DS, Cecatti JG, Parpinelli MA, Haddad SM, Costa ML, Sousa MH, Souza JP, Camargo RS, Pacagnella RC, Surita FG, Pinto E Silva JL, Brazilian Network for Surveillance of Severe Maternal Morbidity. Severe maternal morbidity due to abortion prospectively identified in a surveillance network in Brazil. *Int J Gynaecol Obstet*. 2012; 119(1): 44-8.

Saucedo M, Deneux-Tharaux C, Bouvier-Colle M-H, French National Experts Committee on Maternal Mortality. Ten years of confidential inquiries into maternal deaths in France, 1998-2007. *Obstet Gynecol*. 2013; 122(4): 752-60.

Saucedo M, Deneux-Tharaux C, Bouvier-Colle M-H. Understanding regional differences in maternal mortality: a national case-control study in France. *BJOG*. 2012; 119(5): 573-81.

Schutte JM, Steegers EAP, Schuitemaker NWE, Santema JG, de Boer K, Pel M, Vermeulen G, Visser W, van Roosmalen J, Netherlands Maternal Mortality Committee. Rise in maternal mortality in the Netherlands. *BJOG*. 2010; 117(4): 399-406.

Serwaa-Bonsu A, Herbst AJ, Reniers G, Ijaa W, Clark B, Kabudula C, Sankoh O. First experiences in the implementation of biometric technology to link data from Health and Demographic Surveillance Systems with health facility data. *Glob Health Action*. 2010; 3.

Sorensen BL, Elsass P, Nielsen BB, Massawe S, Nyakina J, Rasch V. Substandard emergency obstetric care - a confidential enquiry into maternal deaths at a regional hospital in Tanzania. *Trop Med Int Health*. 2010; 15(8): 894-900.

Statistics Portugal. Portugal Vital Statistics - Deaths 2005-2006.

Teguete I, Traore Y, Dennis N, Mounkoro N, Traore M, Dolo A. A 19-year retrospective investigation of maternal mortality at Point G National Hospital, Bamako, Mali. *Int J Gynaecol Obstet*. 2010; 108(3): 194-8.

Tikkanen M, Gissler M, Metsäranta M, Luukkaala T, Hiilesmaa V, Andersson S, Ylikorkkala O, Paavonen J, Nuutila M. Maternal deaths in Finland: focus on placental abruption. *Acta Obstet Gynecol Scand*. 2009; 88(10): 1124-7.

Turkish Statistical Institute. Turkey Causes of Death Statistics 2010-2012. Ankara, Turkey: Turkish Statistical Institute.

Van den Akker T, van Rhenen J, Mwangomba B, Lommerse K, Vinkhumbo S, van Roosmalen J. Reduction of Severe Acute Maternal Morbidity and Maternal Mortality in Thyolo District, Malawi: The Impact of Obstetric Audit. *PLoS One*. 2011; 6(6): e20776.

Vink NM, de Jonge HCC, Ter Haar R, Chizimba EM, Stekelenburg J. Maternal death reviews at a rural hospital in Malawi. *Int J Gynaecol Obstet*. 2013; 120(1): 74-7.

Vrachnis N, Iliodromiti S, Samoli E, Iliodromiti Z, Dendrinou S, Creatsas G. Maternal mortality in Greece, 1996-2006. *Int J Gynaecol Obstet*. 2011; 115(1): 16-9.

Welsch H, Krone HA, Wissler J. Maternal mortality in Bavaria between 1983 and 2000. *Am J Obstet Gynecol*. 2004; 191(1): 304-8.

World Health Organisation (WHO). WHO Mortality Database Version February 2014. Geneva, Switzerland: World Health Organisation (WHO), 2014.

World Health Organisation (WHO). WHO Mortality Database Version July 2012. Geneva, Switzerland: World Health Organisation (WHO), 2012.

You F, Huo K, Wang R, Xu D, Deng J, Wei Y, Shi F, Liu H, Cheng G, Zhang Z, Yang P, Sun T, Wang X, Jacobsson B, Zhu C. Maternal mortality in Henan Province, China: changes between 1996 and 2009. *PLoS One*. 2012; 7(10): e47153.

Zakariah AY, Alexander S, van Roosmalen J, Buekens P, Kwawukume EY, Frimpong P. Reproductive age mortality survey (RAMOS) in Accra, Ghana. *Reprod Health*. 2009; 7.

Zhu L, Qin M, Du L, Jia W, Yang Q, Walker MC, Wen SW. Comparison of maternal mortality between migrating population and permanent residents in Shanghai, China, 1996-2005. *BJOG*. 2009; 116(3): 401-7.

Zimbabwe Vital Statistics - Deaths 1995.

**Timing of Maternal Death**

Abdel-Hady E-S, Mashaly A-M, Sherief LS, Hassan M, Al-Gohary A, Farag MK, El-Khoeriby F. Why do mothers die in Dakahlia, Egypt?. *J Obstet Gynaecol Res*. 2007; 33(3): 283-7.

Abouchadi S, Belghiti Alaoui A, Meski FZ, De Brouwere V. Implementing a maternal mortality surveillance system in Morocco - challenges and opportunities. *Trop Med Int Health*. 2013; 18(3): 357-65.

Adegoke AA, Campbell M, Ogundeji MO, Lawoyin T, Thomson AM. Place of birth or place of death: An evaluation of 1139 maternal deaths in Nigeria. *Midwifery*. 2013.

Ahmad Z. Maternal mortality in an obstetric unit. *J Pak Med Assoc*. 1985; 35(8): 243-8.

Ali AAA, Adam I. Lack of antenatal care, education, and high maternal mortality in Kassala hospital, eastern Sudan during 2005-2009. *J. Matern. Fetal. Neonatal. Med*. 2011; 24(8): 1077-8.

Alves SV. Maternal mortality in Pernambuco, Brazil: what has changed in ten years?. *Reprod Health Matters*. 2007; 15(30): 134-44.

Amarin Z, Khader Y, Okour A, Jaddou H, Al-Qutob R. National maternal mortality ratio for Jordan, 2007-2008. *Int J Gynaecol Obstet*. 2010; 111(2): 152-6.

Andersen BR, Westergaard HB, Bødker B, Weber T, Møller M, Sørensen JL. Maternal mortality in Denmark, 1985-1994. *Eur J Obstet Gynecol Reprod Biol*. 2009; 142(2): 124-8.

Andersgaard AB, Langhoff-Roos J, Øian P. Direct maternal deaths in Norway 1976-1995. *Acta Obstet Gynecol Scand*. 2008; 87(8): 856-61.

Asnani MR, McCaw-Binns AM, Reid ME. Excess risk of maternal death from sickle cell disease in Jamaica: 1998-2007. *PLoS One*. 2011; 6(10): e26281.

Atrash HK, Koonin LM, Lawson HW, Franks AL, Smith JC. Maternal mortality in the United States, 1979-1986. *Obstet Gynecol*. 1990; 76(6): 1055-60.

Bano N, Chaudhri R, Yasmeen L, Shafi F, Ejaz L. A study of maternal mortality in 8 principal hospitals in Pakistan in 2009. *Int J Gynaecol Obstet*. 2011; 114(3): 255-9.

Barnett S, Nair N, Tripathy P, Borghi J, Rath S, Costello A. A prospective key informant surveillance system to measure maternal mortality -- findings from indigenous populations in Jharkhand and Orissa, India. *BMC Pregnancy Childbirth*. 2008; 8(6): 6.

- Bartlett LA, Mawji S, Whitehead S, Crouse C, Dalil S, Ionete D, Salama P. Where giving birth is a forecast of death: maternal mortality in four districts of Afghanistan, 1999-2002. *Lancet*. 2005; 365(9462): 864-70.
- Bashour H, Abdulsalam A, Jabr A, Cheikha S, Tabbaa M, Lahham M, Dihman R, Khadra M, Campbell OMR. Maternal mortality in Syria: causes, contributing factors and preventability. *Trop Med Int Health*. 2009; 14(9): 1122-7.
- Baul MK, Manjusha. Maternal mortality--a ten-year study. *J Indian Med Assoc*. 2004; 102(1): 18-9, 25.
- Bell JS, Ouédraogo M, Ganaba R, Sombié I, Byass P, Baggaley RF, Filippi V, Fitzmaurice AE, Graham WJ. The epidemiology of pregnancy outcomes in rural Burkina Faso. *Trop Med Int Health*. 2008; 13 Suppl 1: 31-43.
- Berg CJ, Atrash HK, Koonin LM, Tucker M. Pregnancy-related mortality in the United States, 1987-1990. *Obstet Gynecol*. 1996; 88(2): 161-7.
- Berg CJ, Callaghan WM, Syverson C, Henderson Z. Pregnancy-related mortality in the United States, 1998 to 2005. *Obstet Gynecol*. 2010; 116(6): 1302-9.
- Berg CJ, Chang J, Callaghan WM, Whitehead SJ. Pregnancy-related mortality in the United States, 1991-1997. *Obstet Gynecol*. 2003; 101(2): 289-96.
- Bergsjø P, Vangen S, Lie RT, Lyatuu R, Lie-Nielsen E, Oneko O. Recording of maternal deaths in an East African university hospital. *Acta Obstet Gynecol Scand*. 2010; 89(6): 789-93.
- Bhatia JC. Levels and causes of maternal mortality in southern India. *Stud Fam Plann*. 1993; 24(5): 310-8.
- Bødker B, Hvidman L, Weber T, Møller M, Aarre A, Nielsen KM, Sørensen JL. Maternal deaths in Denmark 2002-2006. *Acta Obstet Gynecol Scand*. 2009; 88(5): 556-62.
- Bouvier-Colle MH, Ouedraogo C, Dumont A, Vangeenderhuysen C, Salanave B, Decam C. Maternal mortality in West Africa. Rates, causes and substandard care from a prospective survey. *Acta Obstet Gynecol Scand*. 2001; 80(2): 113-9.
- Bouvier-Colle M-H, Saucedo M, Deneux-Tharoux C, CNEMM. [The confidential enquiries into maternal deaths, 1996-2006 in France: what consequences for the obstetrical care?]. *J Gynecol Obstet Biol Reprod (Paris)*. 2011; 40(2): 87-102.
- Bouvier-Colle MH, Varnoux N, Costes P, Hatton F. Reasons for the underreporting of maternal mortality in France, as indicated by a survey of all deaths among women of childbearing age. *Int J Epidemiol*. 1991; 20(3): 717-21.
- Cecatti JG, Faúndes A, Surita FG. Maternal mortality in Campinas: evolution, under-registration and avoidance. *Sao Paulo Med J*. 1999; 117(1): 5-12.
- Chang J, Elam-Evans LD, Berg CJ, Herndon J, Flowers L, Seed KA, Syverson CJ. Pregnancy-related mortality surveillance--United States, 1991--1999. *MMWR Surveill Summ*. 2003; 52(2): 1-8.
- Christian P, Katz J, Wu L, Kimbrough-Pradhan E, Khatry SK, LeClerq SC, West KP Jr. Risk factors for pregnancy-related mortality: a prospective study in rural Nepal. *Public Health*. 2008; 122(2): 161-72.
- Cliffe S, Black D, Bryant J, Sullivan E. Maternal deaths in New South Wales, Australia: a data linkage project. *Aust N Z J Obstet Gynaecol*. 2008; 48(3): 255-60.
- Correia RA, Araújo HC, Furtado BMA, Bonfim C. [Epidemiological features of maternal deaths occurred in Recife, PE, Brazil (2000-2006)]. *Rev Bras Enferm*. 2011; 64(1): 91-7.
- Deneux-Tharoux C, Berg C, Bouvier-Colle M-H, Gissler M, Harper M, Nannini A, Alexander S, Wildman K, Breart G, Buekens P. Underreporting of pregnancy-related mortality in the United States and Europe. *Obstet Gynecol*. 2005; 106(4): 684-92.
- Donati S, Senatore S, Ronconi A, Regional maternal mortality working group. Maternal mortality in Italy: a record-linkage study. *BJOG*. 2011; 118(7): 872-9.
- Dorfman SF. Maternal mortality in New York City, 1981-1983. *Obstet Gynecol*. 1990; 76(3 Pt 1): 317-23.
- Elhassan EM, Mirghani OA, Adam I. High maternal mortality and stillbirth in the Wad Medani Hospital, Central Sudan, 2003-2007. *Trop Doct*. 2009; 39(4): 238-9.
- Esscher A, Högberg U, Haglund B, Essén B. Maternal mortality in Sweden 1988-2007: more deaths than officially reported. *Acta Obstet Gynecol Scand*. 2013; 92(1): 40-6.
- Fauveau V, Koenig MA, Chakraborty J, Chowdhury AI. Causes of maternal mortality in rural Bangladesh, 1976-85. *Bull World Health Organ*. 1988; 66(5): 643-51.

Fauveau VA. The Lao People's Democratic Republic: maternal mortality and female mortality: determining causes of deaths. *World Health Stat Q.* 1995; 48(1): 44-6.

Feng XL, Zhu J, Zhang L, Song L, Hipgrave D, Guo S, Ronsmans C, Guo Y, Yang Q. Socio-economic disparities in maternal mortality in China between 1996 and 2006. *BJOG.* 2010; 117(12): 1527-36.

Ganyaglo GYK, Hill WC. A 6-year (2004-2009) review of maternal mortality at the Eastern Regional Hospital, Koforidua, Ghana. *Semin. Perinatol.* 2012; 36(1): 79-83.

Garba M, Nayama M, Alio AP, Holloway ML, Hamisu BS, Salihu HM. Maternal mortality in Niger: a retrospective study in a high risk maternity. *Afr J Med Med Sci.* 2011; 40(4): 393-7.

Garenne M, Mbaye K, Bah MD, Correa P. Risk factors for maternal mortality: a case-control study in Dakar hospitals (Senegal). *Afr J Reprod Health.* 1997; 1(1): 14-24.

Garenne M, Sauerborn R, Nougara A, Borchert M, Benzler J, Diesfeld J. Direct and indirect estimates of maternal mortality in rural Burkina Faso. *Stud Fam Plann.* 1997; 28(1): 54-61.

Gissler M, Berg C, Bouvier-Colle M-H, Buekens P. Methods for identifying pregnancy-associated deaths: population-based data from Finland 1987-2000. *Paediatr Perinat Epidemiol.* 2004; 18(6): 448-55.

Gissler M, Deneux-Tharaux C, Alexander S, Berg CJ, Bouvier-Colle M-H, Harper M, Nannini A, Bréart G, Buekens P. Pregnancy-related deaths in four regions of Europe and the United States in 1999-2000: characterisation of unreported deaths. *Eur J Obstet Gynecol Reprod Biol.* 2007; 133(2): 179-85.

Gissler M, Kauppila R, Meriläinen J, Toukoma H, Hemminki E. Pregnancy-associated deaths in Finland 1987-1994--definition problems and benefits of record linkage. *Acta Obstet Gynecol Scand.* 1997; 76(7): 651-7.

Gomes MC, Ventura MT, Nunes RS. How many maternal deaths are there in Portugal?. *J. Matern. Fetal. Neonatal. Med.* 2012; 25(10): 1975-9.

Goswami D, Rathore AM, Batra S, Dubey C, Tyagi S, Wadhwa L. Facility-based review of 296 maternal deaths at a tertiary centre in India: Could they be prevented?. *J. Obstet. Gynaecol. Res.* 2013.

Granja AC, Machungo F, Bergstrom S. Avoidability of maternal death in Mozambique: audit and retrospective risk assessment in 106 consecutive cases. *Afr J Health Sci.* 2000; 7(3-4): 83-7.

Granja AC, Machungo F, Gomes A, Bergström S. Adolescent maternal mortality in Mozambique. *J Adolesc Health.* 2001; 28(4): 303-6.

Guin G, Sahu B, Khare S, Kavishwar A. Trends in Maternal Mortality and Impact of Janani Suraksha Yojana (JSY) on Maternal Mortality Ratio in a Tertiary Referral Hospital. *J Obstet Gynaecol India.* 2012; 62(3): 307-11.

Gupta N, Kumar S, Saxena NC, Nandan D, Saxena BN. Maternal mortality in seven districts of Uttar Pradesh - an ICMR task force study. *Indian J Public Health.* 2006; 50(3): 173-8.

Gurina NA, Vangen S, Forsén L, Sundby J. Maternal mortality in St. Petersburg, Russian Federation. *Bull World Health Organ.* 2006; 84(4): 283-9.

Haggaz AA, Radi EA, Adam I. High maternal mortality in Darfur, Sudan. *Int J Gynaecol Obstet.* 2007; 98(3): 252-3.

Hansen GF, Chez RA. Maternal deaths in New Jersey: 1988. *N J Med.* 1990; 87(12): 995-8.

Högberg U, Innala E, Sandström A. Maternal mortality in Sweden, 1980-1988. *Obstet Gynecol.* 1994; 84(2): 240-4.

Högberg U. Maternal deaths in Sweden, 1971-1980. *Acta Obstet Gynecol Scand.* 1986; 65(2): 161-7.

Høj L, da Silva D, Hedegaard K, Sandström A, Aaby P. Factors associated with maternal mortality in rural Guinea-Bissau. A longitudinal population-based study. *BJOG.* 2002; 109(7): 792-9.

Høj L, da Silva D, Hedegaard K, Sandström A, Aaby P. Maternal mortality: only 42 days?. *BJOG.* 2003; 110(11): 995-1000.

Høj L, Stensballe J, Aaby P. Maternal mortality in Guinea-Bissau: the use of verbal autopsy in a multi-ethnic population. *Int J Epidemiol.* 1999; 28(1): 70-6.

Horon IL, Cheng D. Enhanced surveillance for pregnancy-associated mortality--Maryland, 1993-1998. *JAMA.* 2001; 285(11): 1455-9.

- Hurt LS, Alam N, Dieltiens G, Aktar N, Ronsmans C. Duration and magnitude of mortality after pregnancy in rural Bangladesh. *Int J Epidemiol.* 2008; 37(2): 397-404.
- Hussain F, Bhuiyan AB, Haque YA, Flora MS. Verbal autopsy for maternal death. *Bangladesh Med Res Counc Bull.* 2002; 28(1): 45-53.
- Igwegbe AO, Eleje GU, Ugboaja JO, Ofiaeli RO. Improving maternal mortality at a university teaching hospital in Nnewi, Nigeria. *Int J Gynaecol Obstet.* 2012; 116(3): 197-200.
- Iloki LH, G'Bala Sapoulou MV, Kpepede F, Ekoundzola JR. [Maternal mortality in Brazzaville (1993-1994)]. *J Gynecol Obstet Biol Reprod (Paris).* 1997; 26(2): 163-8.
- Jafarey SN, Rizvi T, Koblinsky M, Kureshy N. Verbal autopsy of maternal deaths in two districts of Pakistan--filling information gaps. *J Health Popul Nutr.* 2009; 27(2): 170-83.
- Jashnani KD, Rupani AB, Wani RJ. Maternal mortality: an autopsy audit. *J Postgrad Med.* 2009; 55(1): 12-6.
- Kale PL, Costa AJL. Maternal deaths in the city of Rio de Janeiro, Brazil, 2000-2003. *J Health Popul Nutr.* 2009; 27(6): 794-801.
- Kane TT, el-Kady AA, Saleh S, Hage M, Stanback J, Potter L. Maternal mortality in Giza, Egypt: magnitude, causes, and prevention. *Stud Fam Plann.* 1992; 23(1): 45-57.
- Kanyighe C, Channon A, Tadesse E, Madise N, Changole J, Bakuwa E, Malunga E, Stones RW. Determinants of post-partum maternal mortality at Queen Elizabeth Central Hospital, Blantyre, Malawi: a case-control study 2001-2002. *Afr J Reprod Health.* 2008; 12(3): 35-48.
- Karimian-Teherani D, Haidinger G, Waldhoer T, Beck A, Vutuc C. Under-reporting of direct and indirect obstetrical deaths in Austria, 1980-98. *Acta Obstet Gynecol Scand.* 2002; 81(4): 323-7.
- Kavatkar AN, Sahasrabudhe NS, Jadhav MV, Deshmukh SD. Autopsy study of maternal deaths. *Int J Gynaecol Obstet.* 2003; 81(1): 1-8.
- Khan AR, Jahan FA, Begum SF. Maternal mortality in rural Bangladesh: the Jamalpur District. *Stud Fam Plann.* 1986; 17(1): 7-12.
- Khumanthem PD, Chanam MS, Samjetshabam RD. Maternal mortality and its causes in a tertiary center. *J Obstet Gynaecol India.* 2012; 62(2): 168-71.
- Kilpatrick SJ, Crabtree KE, Kemp A, Geller S. Preventability of maternal deaths: comparison between Zambian and American referral hospitals. *Obstet Gynecol.* 2002; 100(2): 321-6.
- Kodio B, de Bernis L, Ba M, Ronsmans C, Pison G, Etard J-F. Levels and causes of maternal mortality in Senegal. *Trop Med Int Health.* 2002; 7(6): 499-505.
- Koenig MA, Fauveau V, Chowdhury AI, Chakraborty J, Khan MA. Maternal mortality in Matlab, Bangladesh: 1976-85. *Stud Fam Plann.* 1988; 19(2): 69-80.
- Koonin LM, MacKay AP, Berg CJ, Atrash HK, Smith JC. Pregnancy-related mortality surveillance--United States, 1987-1990. *MMWR CDC Surveill Summ*. 1997; 46(4): 17-36.
- Kumar R, Sharma AK, Barik S, Kumar V. Maternal mortality inquiry in a rural community of north India. *Int J Gynaecol Obstet.* 1989; 29(4): 313-9.
- Laurenti R, Buchalla CM, de Lolio CA, Santo AH, Jorge MH. [Mortality among women in reproductive age in the municipality of São Paulo, Brazil, 1986. II. Deaths by maternal causes]. *Rev Saude Publica.* 1990; 24(6): 468-72.
- Liang J, Zhu J, Wang Y, Wu Y, Dai L, Miao L, Zhou G. [Epidemiological analysis of the maternal mortality surveillance data (1996-2000) in China]. *Sichuan Da Xue Xue Bao Yi Xue Ban.* 2007; 38(1): 138-41.
- Lisonkova S, Liu S, Bartholomew S, Liston RM, Joseph KS, Maternal Health Study Group of the Canadian Perinatal Surveillance System. Temporal trends in maternal mortality in Canada II: estimates based on hospitalization data. *J Obstet Gynaecol Can.* 2011; 33(10): 1020-30.
- MacLeod J, Rhode R. Retrospective follow-up of maternal deaths and their associated risk factors in a rural district of Tanzania. *Trop Med Int Health.* 1998; 3(2): 130-7.
- Macpherson TA. A retrospective study of maternal deaths in the Zimbabwean black. *Cent Afr J Med.* 1981; 27(4): 57-60.
- Maharlouei N, Zakeri Z, Mazloomi E, Lankarani KB. Maternal mortality rate in Fars Province: trends and associated factors in a community-based survey. *Arch Iran Med.* 2012; 15(1): 14-7.
- Mallé D, Ross DA, Campbell OM, Huttly SR. Institutional maternal mortality in Mali. *Int J Gynaecol Obstet.* 1994; 46(1): 19-26.



Mayi-Tsonga S, Ndombi I, Oksana L, Methogo M, Diallo T, Mendome G, Mounanga M. [Maternal mortality in Libreville, Gabon: assessment and challenges]. *Santé (Montrouge, France)*. 2008; 18(4): 193-7.

McCaw-Binns A, Alexander SF, Lindo JLM, Escoffery C, Spence K, Lewis-Bell K, Lewis G. Epidemiologic transition in maternal mortality and morbidity: new challenges for Jamaica. *Int J Gynaecol Obstet*. 2007; 96(3): 226-32.

Meili G, Huch R, Huch A, Zimmermann R. [Maternal mortality in Switzerland 1985-1994]. *Gynakol Geburtshilfliche Rundsch*. 2003; 43(3): 158-65

Melrose EB. Maternal deaths at King Edward VIII Hospital, Durban. A review of 258 consecutive cases. *S Afr Med J*. 1984; 65(5): 161-5.

Menéndez C, Romagosa C, Ismail MR, Carrilho C, Saute F, Osman N, Machungo F, Bardaji A, Quintó L, Mayor A, Naniche D, Dobaño C, Alonso PL, Ordi J. An autopsy study of maternal mortality in Mozambique: the contribution of infectious diseases. *PLoS Med*. 2008; 5(2): e44.

Mhango C, Rochat R, Arkutu A. Reproductive mortality in Lusaka, Zambia, 1982-1983. *Stud Fam Plann*. 1986; 17(5): 243-51.

Mitchell C, Lawton E, Morton C, McCain C, Holtby S, Main E. California Pregnancy-Associated Mortality Review: Mixed Methods Approach for Improved Case Identification, Cause of Death Analyses and Translation of Findings. *Matern Child Health J*. 2013.

Mohammed AA, Elnour MH, Mohammed EE, Ahmed SA, Abdelfattah AI. Maternal mortality in Kassala State - Eastern Sudan: community-based study using Reproductive age mortality survey (RAMOS). *BMC Pregnancy Childbirth*. 2011; 11(1): 102.

Moodley J. A review of maternal deaths in South Africa during 1998. National Committee on Confidential Enquiries into Maternal Deaths. *S Afr Med J*. 2000; 90(4): 367-73.

Mswia R, Lewanga M, Moshiro C, Whiting D, Wolfson L, Hemed Y, Alberti KGMM, Kitange H, Mtasiwa D, Setel P. Community-based monitoring of safe motherhood in the United Republic of Tanzania. *Bull World Health Organ*. 2003; 81(2): 87-94.

Mungra A, van Kanten RW, Kanhai HH, van Roosmalen J. Nationwide maternal mortality in Surinam. *Br J Obstet Gynaecol*. 1999; 106(1): 55-9.

Nagaya K, Fetters MD, Ishikawa M, Kubo T, Koyanagi T, Saito Y, Sameshima H, Sugimoto M, Takagi K, Chiba Y, Honda H, Mukubo M, Kawamura M, Satoh S, Neki R. Causes of maternal mortality in Japan. *JAMA*. 2000; 283(20): 2661-7.

Nannini A, Weiss J, Goldstein R, Fogerty S. Pregnancy-associated mortality at the end of the twentieth century: Massachusetts, 1990-1999. *J Am Med Womens Assoc*. 2002; 57(3): 140-3.

Nisar N, Sohoo NA. Maternal mortality in rural community: a challenge for achieving millennium development goal. *J Pak Med Assoc*. 2010; 60(1): 20-4.

Odum CU, Akinkugbe A. The causes of maternal deaths in eclampsia in Lagos, Nigeria. *West Afr J Med*. 1991; 10(1): 371-6.

Okusanya BO, Aigere EOS, Abe A, Ibrahim HM, Salawu RA. Maternal deaths: initial report of an on-going monitoring of maternal deaths at the Federal Medical Centre Katsina, Northwest Nigeria. *J. Matern. Fetal. Neonatal. Med*. 2013; 26(9): 885-8.

Okwerekwu FE. Maternal mortality in Nigerian women aged 35 years and above. *Asia Oceania J Obstet Gynaecol*. 1991; 17(1): 37-44.

Orellana M, Espinoza L, Montesinos N, Muñoz H, Marchant L. [Analysis of maternal mortality in Chile in 1981 and its associated factors according to death certificates]. *Rev Chil Obstet Ginecol*. 1984; 49(2): 71-83.

Ouédraogo C, Bouvier-Colle MH. [Maternal mortality in West Africa: risk, rates, and rationale]. *J Gynecol Obstet Biol Reprod (Paris)*. 2002; 31(1): 80-9.

Oye-Adeniran BA, Odeyemi KA, Gbadegesin A, Ekanem EE, Osilaja OK, Akin-Adenekan O, Umoh AV. The use of the sisterhood method for estimating maternal mortality ratio in Lagos state, Nigeria. *J Obstet Gynaecol*. 2011; 31(4): 315-9.

Oyieke JBO, Obore S, Kigundu CS. Millennium development goal 5: a review of maternal mortality at the Kenyatta National Hospital, Nairobi. *East Afr Med J*. 2006; 83(1): 4-9.

Ramos S, Karolinski A, Romero M, Mercer R, Maternal Mortality in Argentina Study Group. A comprehensive assessment of maternal deaths in Argentina: translating multicentre collaborative research into action. *Bull World Health Organ*. 2007; 85(8): 615-22.

Rana A, Pradhan N, Manandhar B, Bitsta KD, Adhikari S, Gurung G, Amatya A. Maternal mortality over the last decade: a changing pattern of death due to alarming rise in hepatitis in the latter five-year period. *J. Obstet. Gynaecol. Res*. 2009; 35(2): 243-51.

Rao PS, Amalraj A. Maternal mortality in southern India. *Trop Geogr Med*. 1994; 46(5): 302-4.

Ray S, Madzimbamuto FD, Ramagola-Masire D, Phillips R, Mogobe KD, Haverkamp M, Mokatedi M, Motana M. Review of causes of maternal deaths in Botswana in 2010. *S Afr Med J*. 2013; 103(8): 537-42.

Rochat RW, Koonin LM, Atrash HK, Jewett JF. Maternal mortality in the United States: report from the Maternal Mortality Collaborative. *Obstet Gynecol*. 1988; 72(1): 91-7.

Romagosa C, Ordi J, Saute F, Quintó L, Machungo F, Ismail MR, Carrilho C, Osman N, Alonso PL, Menendez C. Seasonal variations in maternal mortality in Maputo, Mozambique: the role of malaria. *Trop Med Int Health*. 2007; 12(1): 62-7.

Ronsmans C, Scott S, Qomariyah SN, Achadi E, Brauholtz D, Marshall T, Pambudi E, Witten KH, Graham WJ. Professional assistance during birth and maternal mortality in two Indonesian districts. *Bull World Health Organ*. 2009; 87(6): 416-23.

Sandhu AK, Mustafa FE. Maternal mortality in Bahrain 1987-2004: an audit of causes of avoidable death. *East Mediterr Health J*. 2008; 14(3): 720-30.

Sarin AR, Singla P, Kaur H. Maternal mortality -- aetiological factors: analytic study from a teaching hospital of Punjab. *Indian J Matern Child Health*. 1992; 3(3): 69-73.

Saucedo M, Deneux-Tharoux C, Bouvier-Colle M-H. Understanding regional differences in maternal mortality: a national case-control study in France. *BJOG*. 2012; 119(5): 573-81.

Schuitmaker N, van Roosmalen J, Dekker G, van Dongen P, van Geijn H, Bennebroek Gravenhorst J. Confidential enquiry into maternal deaths in The Netherlands 1983-1992. *Eur J Obstet Gynecol Reprod Biol*. 1998; 79(1): 57-62.

Schutte JM, de Jonge L, Schuitmaker NWE, Santema JG, Steegers EAP, van Roosmalen J. Indirect maternal mortality increases in the Netherlands. *Acta Obstet Gynecol Scand*. 2010; 89(6): 762-8.

Schutte JM, Steegers EAP, Schuitmaker NWE, Santema JG, de Boer K, Pel M, Vermeulen G, Visser W, van Roosmalen J, Netherlands Maternal Mortality Committee. Rise in maternal mortality in the Netherlands. *BJOG*. 2010; 117(4): 399-406.

Sousa MH de, Cecatti JG, Hardy EE, Serruya SJ. [Declared maternal death and the linkage between health information systems]. *Rev Saude Publica*. 2007; 41(2): 181-9.

Tomkinson J, Turnbull A, Robson G, Dawson I, Cloake E, Adelstein AM, Ashley J. Report on confidential enquiries into maternal deaths in England and Wales 1976-1978. *Rep Health Soc Subj (Lond)*. 1982; 1-180.

Tran T, Roberson E, Borstell J, Hoyert DL. Evaluation of pregnancy mortality in Louisiana using enhanced linkage and different indicators defined by WHO and CDC/ACOG: challenging and practical issues. *Matern Child Health J*. 2011; 15(7): 955-63.

Traore B, Thera TA, Kokaina C, Beye SA, Mounkoro N, Teguede I, Dolo A. [Maternal mortality at the Gynecology-Obstetrics Service of the Segou Regional Hospital Center of Mali. Retrospective study of 138 cases]. *Mali Med*. 2010; 25(2): 42-7.

Turnbull A, Tindall VR, Beard RW, Robson G, Dawson IM, Cloake EP, Ashley JS, Botting B. Report on Confidential Enquiries into Maternal Deaths in England and Wales 1982-1984. *Rep Health Soc Subj (Lond)*. 1989; 1-166.

Turnbull AC, Tindall VR, Robson G, Dawson IM, Cloake EP, Ashley JS. Report on confidential enquiries into maternal deaths in England and Wales 1979-1981. *Rep Health Soc Subj (Lond)*. 1986; 1-147.

Turner LA, Cyr M, Kinch RAH, Liston R, Kramer MS, Fair M, Heaman M, Maternal Mortality and Morbidity Study Group of the Canadian Perinatal Surveillance System. Under-reporting of maternal mortality in Canada: a question of definition. *Chronic Dis Can*. 2002; 23(1): 22-30.

Turner LA, Kramer MS, Liu S, Maternal Mortality and Morbidity Study Group of the Canadian Perinatal Surveillance System. Cause-specific mortality during and after pregnancy and the definition of maternal death. *Chronic Dis Can*. 2002; 23(1): 31-6.

Tzul AM, Kestler E, Hernández-Prado B, Hernández-Girón C. [Maternal mortality in Guatemala: differences between hospital and non-hospital deaths]. *Salud Publica Mex*. 2006; 48(3): 183-92.

Vallenas G. [Maternal mortality in Peru]. *Rev Peru Poblac*. 1993; 33-56.

Vega CEP, Kahhale S, Zugaib M. Maternal mortality due to arterial hypertension in São Paulo City (1995-1999). *Clinics (Sao Paulo)*. 2007; 62(6): 679-84.

Vink NM, de Jonge HCC, Ter Haar R, Chizimba EM, Stekelenburg J. Maternal death reviews at a rural hospital in Malawi. *Int J Gynaecol Obstet.* 2013; 120(1): 74-7.

Wagaarachchi PT, Fernando L. Trends in maternal mortality and assessment of substandard care in a tertiary care hospital. *Eur J Obstet Gynecol Reprod Biol.* 2002; 101(1): 36-40.

Walker GJ, Ashley DE, McCaw AM, Bernard GW. Maternal mortality in Jamaica. *Lancet.* 1986; 1(8479): 486-8.

Welsch H, Krone HA, Wisser J. Maternal mortality in Bavaria between 1983 and 2000. *Am J Obstet Gynecol.* 2004; 191(1): 304-8.

Wildman K, Bouvier-Colle M-H, MOMS Group. Maternal mortality as an indicator of obstetric care in Europe. *BJOG.* 2004; 111(2): 164-9.

Appendix Table 7: Study level and country level covariates used to model aetiology and timing of maternal death in DisMod-MR 2.0

| Appendix Table 7: Study level and country level covariates used in modeling aetiology and timing of maternal death in DisMod-MR 2.0 |                                                                                             |                                                                                          |
|-------------------------------------------------------------------------------------------------------------------------------------|---------------------------------------------------------------------------------------------|------------------------------------------------------------------------------------------|
| DisMod model                                                                                                                        | Study covariates                                                                            | Country covariates                                                                       |
| Abortive outcome                                                                                                                    | Data source only specified direct causes<br>Data source did not specify "late maternal"     | Legality of abortion (0 - 7: 0 = always illegal, 7 = always legal)                       |
| Hypertensive disorders of pregnancy                                                                                                 | Data source only specified direct causes<br>Data source did not specify "late maternal"     | None                                                                                     |
| Maternal haemorrhage                                                                                                                | Data source only specified direct causes<br>Data source did not specify "late maternal"     | Logit(proportion of pregnancies with in-facility delivery)                               |
| Sepsis                                                                                                                              | Data source only specified direct causes<br>Data source did not specify "late maternal"     | Ln(Lag distributed income)                                                               |
| Obstructed labor                                                                                                                    | Data source only specified direct causes<br>Data source did not specify "late maternal"     | Proportion of pregnancies with in-facility delivery                                      |
| Other direct causes                                                                                                                 | Data source only specified direct causes<br>Data source did not specify "late maternal"     | Ln(Lag distributed income)                                                               |
| Other indirect causes                                                                                                               | Study specified HIV as a subtype of indirect<br>Data source did not specify "late maternal" | None                                                                                     |
| HIV                                                                                                                                 | N/A                                                                                         | N/A                                                                                      |
| Late maternal death                                                                                                                 | None                                                                                        | Logit(proportion of pregnancies with in-facility delivery)<br>Ln(Lag distributed income) |
| Timing - Antepartum                                                                                                                 | None                                                                                        | Proportion of pregnancies with 4 antenatal care visits                                   |
| Timing - Intrapartum                                                                                                                | None                                                                                        | Logit(proportion of pregnancies with in-facility delivery)<br>Ln(Lag distributed income) |
| Timing - Postpartum                                                                                                                 | None                                                                                        | Logit(proportion of pregnancies with in-facility delivery)<br>Ln(Lag distributed income) |
| Timing - Late                                                                                                                       | None                                                                                        | Logit(proportion of pregnancies with in-facility delivery)<br>Ln(Lag distributed income) |

**Appendix Table 8. Global and regional maternal deaths by cause and timing, 1990**

|                              | Cause of death              |                             |                             |                             |                             |                             |                             |                             | Timing of death     |                             |                               |                                |                             |
|------------------------------|-----------------------------|-----------------------------|-----------------------------|-----------------------------|-----------------------------|-----------------------------|-----------------------------|-----------------------------|---------------------|-----------------------------|-------------------------------|--------------------------------|-----------------------------|
|                              | Abortion                    | Haemorrhage                 | Hypertension                | Obstructed labor            | Sepsis                      | Late                        | Other direct                | Indirect                    | HIV                 | Antepartum                  | Intra-partum                  | Post-partum                    | Late                        |
| Worldwide                    | 49 970<br>(45 739 – 54 636) | 71 295<br>(64 562 – 78 329) | 36 497<br>(33 190 – 39 736) | 29 289<br>(26 302 – 32 676) | 34 088<br>(30 460 – 37 965) | 44 814<br>(36 414 – 53 106) | 68 507<br>(58 381 – 80 287) | 40 027<br>(35 425 – 44 294) | 788<br>(458 – 1092) | 84 399<br>(74 155 – 94 836) | 101 872<br>(90 223 – 113 548) | 144 950<br>(130 164 – 159 984) | 44 814<br>(36 414 – 53 106) |
| Andean Latin America         | 288<br>(243 – 340)          | 473<br>(412 – 538)          | 297<br>(253 – 340)          | 149<br>(118 – 179)          | 284<br>(244 – 330)          | 352<br>(294 – 416)          | 250<br>(210 – 294)          | 151<br>(123 – 185)          | 0<br>(0 – 0)        | 307<br>(244 – 382)          | 549<br>(446 – 658)            | 1041<br>(891 – 1198)           | 352<br>(294 – 416)          |
| Australasia                  | 3<br>(2 – 3)                | 3<br>(2 – 4)                | 4<br>(3 – 5)                | 2<br>(2 – 3)                | 2<br>(2 – 3)                | 2<br>(1 – 2)                | 6<br>(5 – 7)                | 3<br>(3 – 4)                | 0<br>(0 – 0)        | 7<br>(6 – 10)               | 7<br>(6 – 9)                  | 9<br>(7 – 11)                  | 2<br>(1 – 2)                |
| Caribbean                    | 196<br>(141 – 267)          | 260<br>(171 – 363)          | 418<br>(306 – 536)          | 114<br>(73 – 173)           | 230<br>(163 – 307)          | 105<br>(69 – 146)           | 183<br>(121 – 257)          | 137<br>(87 – 194)           | 18<br>(10 – 26)     | 445<br>(277 – 698)          | 451<br>(238 – 681)            | 664<br>(460 – 877)             | 105<br>(69 – 146)           |
| Central Asia                 | 120<br>(108 – 133)          | 184<br>(168 – 202)          | 98<br>(88 – 110)            | 100<br>(85 – 115)           | 157<br>(135 – 184)          | 169<br>(144 – 196)          | 220<br>(189 – 249)          | 137<br>(117 – 159)          | 0<br>(0 – 0)        | 384<br>(328 – 436)          | 220<br>(178 – 265)            | 416<br>(364 – 471)             | 169<br>(144 – 196)          |
| Central Europe               | 181<br>(155 – 209)          | 86<br>(76 – 99)             | 53<br>(46 – 63)             | 92<br>(75 – 112)            | 80<br>(70 – 90)             | 82<br>(62 – 104)            | 114<br>(93 – 138)           | 100<br>(75 – 125)           | 0<br>(0 – 0)        | 161<br>(128 – 204)          | 255<br>(215 – 296)            | 292<br>(253 – 335)             | 82<br>(62 – 104)            |
| Central Latin America        | 527<br>(498 – 560)          | 698<br>(663 – 736)          | 665<br>(629 – 704)          | 281<br>(256 – 304)          | 376<br>(352 – 402)          | 215<br>(187 – 247)          | 759<br>(716 – 805)          | 353<br>(318 – 390)          | 2<br>(1 – 3)        | 719<br>(564 – 945)          | 1482<br>(1203 – 1753)         | 1468<br>(1216 – 1738)          | 215<br>(187 – 247)          |
| Central sub-Saharan Africa   | 2037<br>(1525 – 2561)       | 1818<br>(1373 – 2285)       | 1286<br>(972 – 1673)        | 701<br>(548 – 889)          | 1491<br>(1124 – 1930)       | 1687<br>(1126 – 2288)       | 2207<br>(1666 – 2761)       | 875<br>(656 – 1111)         | 55<br>(30 – 80)     | 3986<br>(3038 – 5060)       | 1014<br>(729 – 1362)          | 5490<br>(4233 – 6933)          | 1687<br>(1126 – 2288)       |
| East Asia                    | 3454<br>(2740 – 4293)       | 7366<br>(5941 – 8914)       | 2711<br>(2158 – 3331)       | 3590<br>(2851 – 4386)       | 2101<br>(1599 – 2718)       | 2848<br>(2249 – 3534)       | 4839<br>(3865 – 5891)       | 4713<br>(3749 – 5828)       | 0<br>(0 – 0)        | 5768<br>(3356 – 8346)       | 17 228<br>(13 052 – 22 012)   | 5845<br>(3516 – 8435)          | 2848<br>(2249 – 3534)       |
| Eastern Europe               | 387<br>(342 – 440)          | 158<br>(138 – 180)          | 111<br>(93 – 129)           | 183<br>(133 – 231)          | 98<br>(74 – 123)            | 143<br>(107 – 189)          | 325<br>(265 – 389)          | 158<br>(110 – 211)          | 0<br>(0 – 0)        | 691<br>(589 – 805)          | 151<br>(107 – 208)            | 581<br>(479 – 684)             | 143<br>(107 – 189)          |
| Eastern sub-Saharan Africa   | 8243<br>(7153 – 9404)       | 6017<br>(5117 – 7078)       | 4338<br>(3693 – 4949)       | 2364<br>(2030 – 2725)       | 5424<br>(4668 – 6265)       | 3955<br>(3274 – 4786)       | 11 278<br>(9754 – 12 748)   | 3110<br>(2618 – 3667)       | 433<br>(259 – 590)  | 11 275<br>(9419 – 13 387)   | 8413<br>(6805 – 10308)        | 21 607<br>(18 491 – 24 795)    | 3955<br>(3274 – 4786)       |
| High-income Asia Pacific     | 41<br>(35 – 47)             | 62<br>(53 – 70)             | 40<br>(34 – 46)             | 23<br>(19 – 27)             | 40<br>(33 – 49)             | 16<br>(11 – 20)             | 59<br>(49 – 69)             | 44<br>(37 – 52)             | 0<br>(0 – 0)        | 126<br>(103 – 148)          | 81<br>(62 – 103)              | 101<br>(82 – 125)              | 16<br>(11 – 20)             |
| High-income North America    | 104<br>(89 – 121)           | 61<br>(52 – 70)             | 57<br>(49 – 67)             | 35<br>(22 – 51)             | 76<br>(65 – 89)             | 39<br>(31 – 52)             | 115<br>(101 – 133)          | 67<br>(58 – 78)             | 0<br>(0 – 0)        | 95<br>(72 – 124)            | 179<br>(143 – 218)            | 242<br>(202 – 291)             | 39<br>(31 – 52)             |
| North Africa and Middle East | 1720<br>(1459 – 2051)       | 2935<br>(2501 – 3413)       | 1884<br>(1584 – 2214)       | 1470<br>(1164 – 1775)       | 1388<br>(1147 – 1645)       | 804<br>(574 – 1003)         | 1764<br>(1440 – 2125)       | 1113<br>(900 – 1361)        | 1<br>(0 – 1)        | 3664<br>(2920 – 4578)       | 4055<br>(3323 – 4953)         | 4582<br>(3742 – 5728)          | 804<br>(574 – 1003)         |
| Oceania                      | 200<br>(117 – 334)          | 248<br>(144 – 417)          | 127<br>(71 – 218)           | 117<br>(70 – 192)           | 94<br>(54 – 162)            | 132<br>(69 – 227)           | 198<br>(109 – 325)          | 115<br>(64 – 194)           | 0<br>(0 – 0)        | 263<br>(145 – 448)          | 558<br>(321 – 934)            | 282<br>(153 – 480)             | 132<br>(69 – 227)           |
| South Asia                   | 18 472<br>(15 158 – 21 959) | 34 974<br>(28 749 – 41 478) | 16 265<br>(13 661 – 19 084) | 14 130<br>(11 358 – 17 103) | 15 247<br>(12 164 – 18 687) | 23 722<br>(15 761 – 31 917) | 30 835<br>(21 878 – 41 624) | 20 259<br>(16 347 – 24 152) | 162<br>(83 – 251)   | 40 253<br>(32 090 – 49 309) | 38 333<br>(29 858 – 48 152)   | 72 108<br>(59 776 – 85 399)    | 23 722<br>(15 761 – 31 917) |
| Southeast Asia               | 5261<br>(3992 – 6903)       | 6602<br>(5179 – 8271)       | 3856<br>(2748 – 5157)       | 2657<br>(2034 – 3383)       | 2647<br>(1954 – 3577)       | 3874<br>(2995 – 4993)       | 6386<br>(4521 – 8530)       | 3975<br>(2976 – 5109)       | 2<br>(1 – 3)        | 7574<br>(5666 – 9981)       | 15 499<br>(12 539 – 19 184)   | 8392<br>(6488 – 11 274)        | 3874<br>(2995 – 4993)       |
| Southern Latin America       | 154<br>(139 – 170)          | 72<br>(63 – 81)             | 74<br>(66 – 82)             | 39<br>(32 – 47)             | 121<br>(109 – 133)          | 35<br>(27 – 45)             | 68<br>(54 – 83)             | 39<br>(32 – 49)             | 0<br>(0 – 0)        | 268<br>(218 – 316)          | 130<br>(103 – 163)            | 170<br>(135 – 216)             | 35<br>(27 – 45)             |
| Southern sub-Saharan Africa  | 408<br>(312 – 514)          | 333<br>(247 – 424)          | 370<br>(268 – 469)          | 127<br>(90 – 168)           | 405<br>(301 – 503)          | 285<br>(198 – 392)          | 259<br>(185 – 341)          | 236<br>(175 – 304)          | 29<br>(18 – 41)     | 493<br>(320 – 685)          | 509<br>(313 – 672)            | 1167<br>(863 – 1483)           | 285<br>(198 – 392)          |
| Tropical Latin America       | 347<br>(310 – 391)          | 382<br>(340 – 428)          | 622<br>(549 – 700)          | 114<br>(91 – 139)           | 468<br>(416 – 527)          | 240<br>(183 – 303)          | 327<br>(292 – 368)          | 310<br>(273 – 355)          | 1<br>(1 – 2)        | 408<br>(276 – 542)          | 773<br>(516 – 1036)           | 1397<br>(1125 – 1700)          | 240<br>(183 – 303)          |
| Western Europe               | 104<br>(95 – 115)           | 71<br>(64 – 79)             | 63<br>(57 – 71)             | 44<br>(39 – 50)             | 79<br>(70 – 88)             | 39<br>(32 – 46)             | 110<br>(98 – 124)           | 54<br>(48 – 60)             | 0<br>(0 – 0)        | 123<br>(103 – 143)          | 165<br>(143 – 191)            | 238<br>(213 – 264)             | 39<br>(32 – 46)             |
| Western sub-Saharan Africa   | 7723<br>(6354 – 9125)       | 8491<br>(7115 – 10 149)     | 3160<br>(2545 – 4111)       | 2959<br>(2313 – 3706)       | 3278<br>(2641 – 4079)       | 6070<br>(4484 – 7628)       | 8202<br>(6831 – 9797)       | 4078<br>(3277 – 4965)       | 85<br>(47 – 125)    | 7388<br>(5786 – 9166)       | 11 819<br>(9618 – 14 495)     | 18 857<br>(16 101 – 22 156)    | 6070<br>(4484 – 7628)       |

**Appendix Table 9. Number of maternal deaths by underlying cause in 1990 for 188 countries**

|                        | Cause of death        |                       |                       |                      |                     |                       |                       |                       |              |
|------------------------|-----------------------|-----------------------|-----------------------|----------------------|---------------------|-----------------------|-----------------------|-----------------------|--------------|
|                        | Abortion              | Haemorrhage           | Hypertension          | Obstructed labor     | Sepsis              | Late                  | Other direct          | Indirect              | HIV          |
| Afghanistan            | 441<br>(259 – 701)    | 685<br>(392 – 1064)   | 446<br>(253 – 713)    | 372<br>(202 – 624)   | 353<br>(189 – 566)  | 248<br>(123 – 440)    | 466<br>(251 – 797)    | 244<br>(123 – 421)    | 0<br>(0 – 0) |
| Albania                | 4<br>(3 – 6)          | 4<br>(3 – 6)          | 3<br>(2 – 4)          | 4<br>(2 – 6)         | 2<br>(1 – 4)        | 3<br>(2 – 5)          | 5<br>(4 – 7)          | 3<br>(2 – 5)          | 0<br>(0 – 0) |
| Algeria                | 110<br>(67 – 168)     | 208<br>(129 – 307)    | 160<br>(102 – 242)    | 141<br>(83 – 215)    | 76<br>(43 – 119)    | 57<br>(24 – 100)      | 136<br>(75 – 217)     | 60<br>(30 – 99)       | 0<br>(0 – 0) |
| Andorra                | 0<br>(0 – 0)          | 0<br>(0 – 0)          | 0<br>(0 – 0)          | 0<br>(0 – 0)         | 0<br>(0 – 0)        | 0<br>(0 – 0)          | 0<br>(0 – 0)          | 0<br>(0 – 0)          | 0<br>(0 – 0) |
| Angola                 | 498<br>(289 – 781)    | 444<br>(268 – 694)    | 317<br>(180 – 504)    | 174<br>(108 – 266)   | 370<br>(219 – 585)  | 424<br>(205 – 698)    | 519<br>(303 – 814)    | 219<br>(126 – 357)    | 5<br>(3 – 9) |
| Antigua and Barbuda    | 0<br>(0 – 0)          | 0<br>(0 – 0)          | 0<br>(0 – 0)          | 0<br>(0 – 0)         | 0<br>(0 – 0)        | 0<br>(0 – 0)          | 0<br>(0 – 0)          | 0<br>(0 – 0)          | 0<br>(0 – 0) |
| Argentina              | 112<br>(99 – 127)     | 57<br>(50 – 66)       | 50<br>(44 – 57)       | 28<br>(22 – 36)      | 91<br>(81 – 102)    | 28<br>(20 – 38)       | 44<br>(30 – 58)       | 23<br>(17 – 32)       | 0<br>(0 – 0) |
| Armenia                | 4<br>(3 – 5)          | 5<br>(3 – 6)          | 4<br>(3 – 5)          | 3<br>(2 – 4)         | 4<br>(2 – 6)        | 4<br>(3 – 6)          | 5<br>(3 – 7)          | 4<br>(2 – 5)          | 0<br>(0 – 0) |
| Australia              | 2<br>(1 – 2)          | 2<br>(2 – 3)          | 3<br>(2 – 4)          | 2<br>(1 – 2)         | 2<br>(1 – 2)        | 1<br>(1 – 2)          | 4<br>(3 – 5)          | 2<br>(2 – 3)          | 0<br>(0 – 0) |
| Austria                | 2<br>(1 – 3)          | 1<br>(1 – 2)          | 1<br>(1 – 2)          | 1<br>(0 – 1)         | 1<br>(1 – 2)        | 1<br>(0 – 1)          | 2<br>(1 – 2)          | 1<br>(1 – 1)          | 0<br>(0 – 0) |
| Azerbaijan             | 8<br>(6 – 10)         | 15<br>(12 – 18)       | 8<br>(6 – 11)         | 7<br>(5 – 11)        | 11<br>(6 – 15)      | 12<br>(8 – 17)        | 13<br>(8 – 18)        | 10<br>(6 – 14)        | 0<br>(0 – 0) |
| Bahrain                | 1<br>(0 – 2)          | 2<br>(1 – 2)          | 1<br>(1 – 1)          | 1<br>(1 – 1)         | 1<br>(0 – 1)        | 0<br>(0 – 1)          | 1<br>(0 – 2)          | 1<br>(0 – 1)          | 0<br>(0 – 0) |
| Bangladesh             | 1908<br>(1106 – 2693) | 5356<br>(3839 – 6863) | 3532<br>(2598 – 4552) | 1109<br>(773 – 1490) | 871<br>(513 – 1291) | 2473<br>(1759 – 3317) | 3348<br>(1887 – 5139) | 2028<br>(1289 – 2860) | 0<br>(0 – 0) |
| Barbados               | 0<br>(0 – 1)          | 0<br>(0 – 1)          | 1<br>(0 – 1)          | 0<br>(0 – 0)         | 0<br>(0 – 0)        | 0<br>(0 – 0)          | 0<br>(0 – 1)          | 0<br>(0 – 0)          | 0<br>(0 – 0) |
| Belarus                | 11<br>(9 – 13)        | 7<br>(5 – 9)          | 4<br>(3 – 6)          | 6<br>(4 – 9)         | 5<br>(3 – 6)        | 5<br>(3 – 7)          | 9<br>(7 – 12)         | 5<br>(3 – 8)          | 0<br>(0 – 0) |
| Belgium                | 3<br>(2 – 4)          | 2<br>(1 – 2)          | 2<br>(1 – 2)          | 1<br>(1 – 2)         | 2<br>(1 – 2)        | 1<br>(0 – 1)          | 3<br>(2 – 4)          | 1<br>(1 – 2)          | 0<br>(0 – 0) |
| Belize                 | 0<br>(0 – 0)          | 0<br>(0 – 1)          | 0<br>(0 – 1)          | 0<br>(0 – 0)         | 0<br>(0 – 0)        | 0<br>(0 – 0)          | 0<br>(0 – 0)          | 0<br>(0 – 0)          | 0<br>(0 – 0) |
| Benin                  | 227<br>(171 – 290)    | 258<br>(180 – 343)    | 97<br>(63 – 137)      | 68<br>(45 – 98)      | 97<br>(66 – 138)    | 166<br>(107 – 257)    | 226<br>(161 – 310)    | 115<br>(63 – 170)     | 1<br>(0 – 1) |
| Bhutan                 | 13<br>(6 – 21)        | 17<br>(7 – 32)        | 13<br>(6 – 22)        | 6<br>(3 – 10)        | 6<br>(3 – 11)       | 11<br>(4 – 19)        | 24<br>(11 – 40)       | 14<br>(6 – 23)        | 0<br>(0 – 0) |
| Bolivia                | 174<br>(133 – 226)    | 161<br>(110 – 211)    | 128<br>(89 – 169)     | 77<br>(57 – 101)     | 120<br>(86 – 163)   | 149<br>(108 – 194)    | 104<br>(75 – 138)     | 63<br>(42 – 89)       | 0<br>(0 – 0) |
| Bosnia and Herzegovina | 4<br>(3 – 6)          | 3<br>(2 – 4)          | 2<br>(1 – 4)          | 3<br>(2 – 4)         | 2<br>(1 – 4)        | 3<br>(1 – 5)          | 4<br>(3 – 5)          | 2<br>(1 – 3)          | 0<br>(0 – 0) |
| Botswana               | 16<br>(8 – 27)        | 13<br>(6 – 22)        | 13<br>(6 – 23)        | 5<br>(2 – 9)         | 15<br>(7 – 25)      | 11<br>(4 – 19)        | 10<br>(5 – 16)        | 10<br>(5 – 17)        | 2<br>(1 – 3) |

|                                  |                       |                       |                       |                       |                       |                       |                       |                       |                 |
|----------------------------------|-----------------------|-----------------------|-----------------------|-----------------------|-----------------------|-----------------------|-----------------------|-----------------------|-----------------|
| Brazil                           | 312<br>(277 – 353)    | 335<br>(295 – 379)    | 589<br>(517 – 664)    | 104<br>(81 – 129)     | 438<br>(386 – 496)    | 223<br>(165 – 283)    | 309<br>(272 – 349)    | 293<br>(254 – 337)    | 1<br>(1 – 2)    |
| Brunei                           | 0<br>(0 – 0)          | 0<br>(0 – 1)          | 0<br>(0 – 0)          | 0<br>(0 – 0)          | 0<br>(0 – 0)          | 0<br>(0 – 0)          | 0<br>(0 – 1)          | 0<br>(0 – 0)          | 0<br>(0 – 0)    |
| Bulgaria                         | 10<br>(8 – 12)        | 5<br>(4 – 7)          | 4<br>(3 – 5)          | 5<br>(3 – 7)          | 5<br>(4 – 6)          | 4<br>(3 – 6)          | 6<br>(4 – 7)          | 3<br>(2 – 5)          | 0<br>(0 – 0)    |
| Burkina Faso                     | 240<br>(164 – 335)    | 357<br>(247 – 489)    | 95<br>(53 – 146)      | 56<br>(25 – 94)       | 107<br>(64 – 178)     | 138<br>(69 – 231)     | 193<br>(120 – 291)    | 123<br>(73 – 192)     | 13<br>(7 – 20)  |
| Burundi                          | 384<br>(251 – 533)    | 289<br>(194 – 411)    | 200<br>(132 – 275)    | 109<br>(71 – 151)     | 251<br>(166 – 360)    | 187<br>(106 – 287)    | 540<br>(376 – 732)    | 145<br>(84 – 232)     | 11<br>(6 – 18)  |
| Cambodia                         | 221<br>(140 – 314)    | 239<br>(166 – 321)    | 120<br>(52 – 202)     | 98<br>(61 – 140)      | 129<br>(86 – 180)     | 138<br>(86 – 201)     | 218<br>(108 – 325)    | 124<br>(77 – 175)     | 0<br>(0 – 1)    |
| Cameroon                         | 424<br>(295 – 572)    | 493<br>(360 – 644)    | 189<br>(113 – 275)    | 136<br>(85 – 192)     | 180<br>(103 – 266)    | 347<br>(211 – 556)    | 445<br>(319 – 582)    | 229<br>(150 – 334)    | 3<br>(2 – 5)    |
| Canada                           | 5<br>(3 – 6)          | 3<br>(2 – 4)          | 3<br>(2 – 4)          | 2<br>(1 – 3)          | 3<br>(2 – 4)          | 4<br>(3 – 6)          | 5<br>(4 – 6)          | 3<br>(3 – 4)          | 0<br>(0 – 0)    |
| Cape Verde                       | 3<br>(2 – 4)          | 3<br>(2 – 4)          | 1<br>(1 – 2)          | 1<br>(0 – 1)          | 1<br>(1 – 2)          | 2<br>(1 – 3)          | 3<br>(2 – 4)          | 1<br>(1 – 2)          | 0<br>(0 – 0)    |
| Central African Republic         | 157<br>(105 – 217)    | 144<br>(92 – 215)     | 102<br>(66 – 146)     | 56<br>(37 – 78)       | 111<br>(72 – 157)     | 138<br>(90 – 198)     | 171<br>(109 – 251)    | 70<br>(46 – 97)       | 22<br>(12 – 33) |
| Chad                             | 253<br>(185 – 336)    | 294<br>(209 – 381)    | 106<br>(62 – 162)     | 73<br>(48 – 104)      | 108<br>(64 – 156)     | 194<br>(100 – 277)    | 260<br>(192 – 347)    | 129<br>(89 – 178)     | 5<br>(3 – 8)    |
| Chile                            | 37<br>(32 – 43)       | 12<br>(9 – 14)        | 21<br>(18 – 25)       | 9<br>(7 – 12)         | 26<br>(22 – 30)       | 6<br>(4 – 9)          | 21<br>(16 – 27)       | 14<br>(11 – 17)       | 0<br>(0 – 0)    |
| China                            | 3377<br>(2655 – 4204) | 7235<br>(5823 – 8736) | 2656<br>(2105 – 3271) | 3516<br>(2770 – 4302) | 2053<br>(1545 – 2676) | 2787<br>(2184 – 3462) | 4732<br>(3771 – 5756) | 4620<br>(3668 – 5748) | 0<br>(0 – 0)    |
| Colombia                         | 146<br>(129 – 167)    | 96<br>(85 – 110)      | 153<br>(132 – 177)    | 26<br>(22 – 32)       | 31<br>(26 – 36)       | 33<br>(15 – 52)       | 119<br>(104 – 137)    | 27<br>(22 – 33)       | 0<br>(0 – 0)    |
| Comoros                          | 15<br>(8 – 25)        | 11<br>(6 – 18)        | 8<br>(4 – 13)         | 4<br>(2 – 7)          | 10<br>(6 – 17)        | 7<br>(4 – 13)         | 21<br>(12 – 34)       | 6<br>(3 – 10)         | 0<br>(0 – 0)    |
| Congo                            | 64<br>(42 – 92)       | 55<br>(34 – 82)       | 38<br>(22 – 58)       | 22<br>(14 – 32)       | 45<br>(29 – 67)       | 56<br>(33 – 84)       | 66<br>(43 – 99)       | 27<br>(17 – 41)       | 4<br>(2 – 7)    |
| Costa Rica                       | 3<br>(3 – 4)          | 3<br>(2 – 4)          | 3<br>(2 – 4)          | 3<br>(2 – 3)          | 3<br>(2 – 4)          | 1<br>(1 – 2)          | 5<br>(4 – 6)          | 4<br>(3 – 5)          | 0<br>(0 – 0)    |
| Croatia                          | 2<br>(1 – 2)          | 1<br>(1 – 2)          | 1<br>(1 – 1)          | 1<br>(1 – 2)          | 1<br>(0 – 1)          | 1<br>(1 – 1)          | 1<br>(1 – 2)          | 1<br>(0 – 1)          | 0<br>(0 – 0)    |
| Cuba                             | 21<br>(17 – 26)       | 10<br>(7 – 16)        | 11<br>(8 – 14)        | 11<br>(7 – 17)        | 14<br>(11 – 19)       | 9<br>(6 – 12)         | 21<br>(15 – 28)       | 25<br>(20 – 31)       | 0<br>(0 – 0)    |
| Cyprus                           | 0<br>(0 – 1)          | 0<br>(0 – 0)          | 0<br>(0 – 1)          | 0<br>(0 – 0)          | 0<br>(0 – 0)    |
| Czech Republic                   | 4<br>(3 – 6)          | 2<br>(2 – 3)          | 3<br>(2 – 4)          | 3<br>(2 – 4)          | 1<br>(1 – 2)          | 2<br>(1 – 3)          | 4<br>(3 – 5)          | 1<br>(1 – 2)          | 0<br>(0 – 0)    |
| Côte d'Ivoire                    | 432<br>(274 – 595)    | 507<br>(340 – 683)    | 193<br>(119 – 287)    | 133<br>(78 – 208)     | 200<br>(123 – 284)    | 349<br>(209 – 511)    | 465<br>(315 – 642)    | 242<br>(134 – 353)    | 12<br>(6 – 18)  |
| Democratic Republic of the Congo | 1279<br>(869 – 1757)  | 1140<br>(788 – 1569)  | 804<br>(543 – 1124)   | 435<br>(300 – 598)    | 936<br>(632 – 1316)   | 1033<br>(616 – 1536)  | 1410<br>(967 – 1942)  | 541<br>(370 – 744)    | 23<br>(12 – 34) |
| Denmark                          | 1<br>(1 – 1)          | 1<br>(0 – 1)          | 1<br>(0 – 1)          | 0<br>(0 – 1)          | 1<br>(0 – 1)          | 0<br>(0 – 0)          | 1<br>(1 – 1)          | 1<br>(0 – 1)          | 0<br>(0 – 0)    |

|                                   |                       |                       |                       |                     |                       |                      |                       |                      |                 |
|-----------------------------------|-----------------------|-----------------------|-----------------------|---------------------|-----------------------|----------------------|-----------------------|----------------------|-----------------|
| Djibouti                          | 23<br>(13 – 35)       | 17<br>(9 – 27)        | 13<br>(7 – 20)        | 7<br>(4 – 10)       | 15<br>(8 – 24)        | 10<br>(5 – 19)       | 30<br>(18 – 48)       | 9<br>(5 – 14)        | 0<br>(0 – 0)    |
| Dominica                          | 0<br>(0 – 0)          | 0<br>(0 – 0)          | 0<br>(0 – 0)          | 0<br>(0 – 0)        | 0<br>(0 – 0)          | 0<br>(0 – 0)         | 0<br>(0 – 0)          | 0<br>(0 – 0)         | 0<br>(0 – 0)    |
| Dominican Republic                | 20<br>(15 – 25)       | 26<br>(21 – 33)       | 40<br>(32 – 48)       | 12<br>(8 – 18)      | 16<br>(12 – 20)       | 12<br>(8 – 16)       | 19<br>(14 – 25)       | 18<br>(14 – 23)      | 0<br>(0 – 0)    |
| Ecuador                           | 31<br>(26 – 37)       | 92<br>(80 – 105)      | 92<br>(80 – 106)      | 25<br>(18 – 34)     | 38<br>(32 – 45)       | 74<br>(55 – 96)      | 50<br>(37 – 63)       | 27<br>(20 – 35)      | 0<br>(0 – 0)    |
| Egypt                             | 131<br>(101 – 171)    | 537<br>(433 – 675)    | 154<br>(122 – 194)    | 123<br>(75 – 188)   | 168<br>(136 – 209)    | 68<br>(34 – 107)     | 122<br>(64 – 188)     | 78<br>(57 – 103)     | 0<br>(0 – 0)    |
| El Salvador                       | 25<br>(19 – 31)       | 32<br>(24 – 40)       | 23<br>(15 – 32)       | 13<br>(8 – 19)      | 27<br>(20 – 34)       | 10<br>(6 – 14)       | 33<br>(25 – 42)       | 19<br>(11 – 28)      | 0<br>(0 – 0)    |
| Equatorial Guinea                 | 18<br>(11 – 30)       | 17<br>(10 – 27)       | 12<br>(7 – 19)        | 6<br>(4 – 11)       | 13<br>(7 – 21)        | 15<br>(8 – 24)       | 19<br>(11 – 34)       | 8<br>(4 – 13)        | 0<br>(0 – 0)    |
| Eritrea                           | 169<br>(120 – 227)    | 128<br>(87 – 175)     | 95<br>(61 – 136)      | 52<br>(36 – 71)     | 116<br>(77 – 156)     | 89<br>(58 – 128)     | 233<br>(175 – 305)    | 62<br>(38 – 96)      | 3<br>(2 – 5)    |
| Estonia                           | 2<br>(1 – 2)          | 1<br>(1 – 1)          | 1<br>(0 – 1)          | 1<br>(0 – 1)        | 1<br>(0 – 1)          | 1<br>(0 – 1)         | 1<br>(1 – 2)          | 1<br>(1 – 1)         | 0<br>(0 – 0)    |
| Ethiopia                          | 2971<br>(2216 – 3766) | 2236<br>(1560 – 3045) | 1633<br>(1192 – 2093) | 872<br>(639 – 1132) | 2066<br>(1528 – 2719) | 1504<br>(877 – 2218) | 4208<br>(3171 – 5258) | 1158<br>(729 – 1635) | 64<br>(33 – 95) |
| Federated States of<br>Micronesia | 1<br>(0 – 2)          | 1<br>(1 – 2)          | 1<br>(0 – 1)          | 1<br>(0 – 1)        | 0<br>(0 – 1)          | 1<br>(0 – 1)         | 1<br>(0 – 2)          | 1<br>(0 – 1)         | 0<br>(0 – 0)    |
| Fiji                              | 4<br>(2 – 6)          | 5<br>(3 – 8)          | 2<br>(1 – 4)          | 2<br>(1 – 4)        | 2<br>(1 – 3)          | 3<br>(1 – 5)         | 4<br>(2 – 6)          | 2<br>(1 – 3)         | 0<br>(0 – 0)    |
| Finland                           | 1<br>(1 – 1)          | 1<br>(0 – 1)          | 1<br>(0 – 1)          | 0<br>(0 – 1)        | 1<br>(0 – 1)          | 0<br>(0 – 0)         | 1<br>(1 – 1)          | 0<br>(0 – 1)         | 0<br>(0 – 0)    |
| France                            | 19<br>(15 – 23)       | 15<br>(13 – 19)       | 11<br>(9 – 14)        | 7<br>(5 – 9)        | 8<br>(6 – 11)         | 12<br>(7 – 17)       | 26<br>(21 – 31)       | 18<br>(14 – 22)      | 0<br>(0 – 0)    |
| Gabon                             | 21<br>(14 – 29)       | 18<br>(12 – 25)       | 13<br>(9 – 18)        | 7<br>(5 – 10)       | 15<br>(10 – 22)       | 21<br>(8 – 36)       | 21<br>(13 – 31)       | 9<br>(6 – 13)        | 0<br>(0 – 0)    |
| Georgia                           | 5<br>(4 – 6)          | 5<br>(4 – 7)          | 5<br>(4 – 6)          | 3<br>(2 – 4)        | 4<br>(2 – 6)          | 5<br>(3 – 6)         | 6<br>(4 – 8)          | 6<br>(4 – 8)         | 0<br>(0 – 0)    |
| Germany                           | 20<br>(16 – 24)       | 18<br>(15 – 22)       | 12<br>(10 – 16)       | 14<br>(11 – 17)     | 36<br>(31 – 43)       | 9<br>(5 – 14)        | 29<br>(22 – 37)       | 7<br>(5 – 10)        | 0<br>(0 – 0)    |
| Ghana                             | 353<br>(223 – 521)    | 393<br>(248 – 575)    | 170<br>(91 – 262)     | 140<br>(81 – 214)   | 166<br>(98 – 251)     | 253<br>(139 – 402)   | 452<br>(283 – 686)    | 208<br>(118 – 334)   | 3<br>(2 – 6)    |
| Greece                            | 2<br>(1 – 3)          | 1<br>(1 – 2)          | 1<br>(1 – 2)          | 1<br>(1 – 1)        | 1<br>(1 – 2)          | 1<br>(0 – 1)         | 2<br>(1 – 2)          | 1<br>(0 – 1)         | 0<br>(0 – 0)    |
| Grenada                           | 0<br>(0 – 0)          | 0<br>(0 – 0)          | 0<br>(0 – 0)          | 0<br>(0 – 0)        | 0<br>(0 – 0)          | 0<br>(0 – 0)         | 0<br>(0 – 0)          | 0<br>(0 – 0)         | 0<br>(0 – 0)    |
| Guatemala                         | 38<br>(32 – 45)       | 81<br>(69 – 94)       | 24<br>(20 – 29)       | 30<br>(19 – 44)     | 46<br>(38 – 55)       | 25<br>(14 – 37)      | 106<br>(86 – 128)     | 58<br>(37 – 81)      | 0<br>(0 – 0)    |
| Guinea                            | 348<br>(256 – 450)    | 390<br>(281 – 526)    | 144<br>(85 – 210)     | 108<br>(69 – 153)   | 160<br>(105 – 224)    | 282<br>(144 – 389)   | 347<br>(240 – 458)    | 181<br>(121 – 255)   | 1<br>(0 – 1)    |
| Guinea-Bissau                     | 52<br>(29 – 82)       | 64<br>(34 – 103)      | 24<br>(13 – 39)       | 17<br>(8 – 29)      | 24<br>(13 – 39)       | 69<br>(38 – 109)     | 56<br>(31 – 89)       | 27<br>(14 – 44)      | 0<br>(0 – 0)    |
| Guyana                            | 4<br>(3 – 5)          | 3<br>(2 – 5)          | 4<br>(2 – 5)          | 2<br>(2 – 3)        | 2<br>(1 – 3)          | 1<br>(1 – 2)         | 3<br>(2 – 3)          | 2<br>(1 – 2)         | 0<br>(0 – 0)    |



|            |                             |                             |                         |                           |                           |                             |                             |                             |                   |
|------------|-----------------------------|-----------------------------|-------------------------|---------------------------|---------------------------|-----------------------------|-----------------------------|-----------------------------|-------------------|
| Haiti      | 141<br>(83 – 208)           | 207<br>(115 – 310)          | 351<br>(238 – 468)      | 83<br>(44 – 142)          | 190<br>(125 – 268)        | 79<br>(44 – 120)            | 133<br>(72 – 204)           | 87<br>(37 – 145)            | 18<br>(10 – 26)   |
| Honduras   | 30<br>(17 – 43)             | 57<br>(33 – 80)             | 30<br>(15 – 48)         | 29<br>(15 – 42)           | 28<br>(14 – 43)           | 16<br>(8 – 25)              | 59<br>(34 – 83)             | 43<br>(21 – 64)             | 1<br>(1 – 2)      |
| Hungary    | 4<br>(3 – 6)                | 3<br>(2 – 4)                | 3<br>(2 – 4)            | 2<br>(1 – 3)              | 2<br>(1 – 3)              | 2<br>(1 – 4)                | 4<br>(3 – 5)                | 2<br>(2 – 3)                | 0<br>(0 – 0)      |
| Iceland    | 0<br>(0 – 0)                | 0<br>(0 – 0)                | 0<br>(0 – 0)            | 0<br>(0 – 0)              | 0<br>(0 – 0)              | 0<br>(0 – 0)                | 0<br>(0 – 0)                | 0<br>(0 – 0)                | 0<br>(0 – 0)      |
| India      | 13 454<br>(10 347 – 16 709) | 25 517<br>(19 707 – 31 967) | 9509<br>(7283 – 11 969) | 11 332<br>(8661 – 14 396) | 12 732<br>(9664 – 16 048) | 18 738<br>(11 198 – 27 374) | 21 860<br>(13 191 – 32 025) | 15 133<br>(11 661 – 18 877) | 162<br>(83 – 250) |
| Indonesia  | 2145<br>(1460 – 3014)       | 3064<br>(2180 – 4135)       | 2037<br>(1358 – 2882)   | 1288<br>(885 – 1716)      | 917<br>(470 – 1359)       | 1832<br>(1161 – 2525)       | 3104<br>(1738 – 4610)       | 2094<br>(1271 – 3135)       | 0<br>(0 – 0)      |
| Iran       | 103<br>(61 – 158)           | 136<br>(76 – 208)           | 60<br>(32 – 97)         | 62<br>(28 – 103)          | 52<br>(24 – 86)           | 41<br>(22 – 68)             | 67<br>(31 – 121)            | 129<br>(75 – 199)           | 0<br>(0 – 0)      |
| Iraq       | 79<br>(44 – 125)            | 173<br>(104 – 264)          | 65<br>(32 – 105)        | 89<br>(47 – 142)          | 126<br>(76 – 189)         | 49<br>(23 – 86)             | 108<br>(55 – 178)           | 46<br>(16 – 84)             | 0<br>(0 – 0)      |
| Ireland    | 1<br>(0 – 1)                | 0<br>(0 – 1)                | 0<br>(0 – 1)            | 0<br>(0 – 0)              | 0<br>(0 – 1)              | 0<br>(0 – 0)                | 1<br>(0 – 1)                | 0<br>(0 – 0)                | 0<br>(0 – 0)      |
| Israel     | 2<br>(1 – 3)                | 1<br>(1 – 2)                | 1<br>(1 – 2)            | 1<br>(1 – 1)              | 1<br>(1 – 2)              | 1<br>(0 – 1)                | 2<br>(1 – 3)                | 1<br>(1 – 2)                | 0<br>(0 – 0)      |
| Italy      | 13<br>(10 – 15)             | 9<br>(7 – 11)               | 7<br>(5 – 9)            | 4<br>(3 – 5)              | 4<br>(2 – 6)              | 3<br>(2 – 5)                | 9<br>(8 – 12)               | 5<br>(4 – 6)                | 0<br>(0 – 0)      |
| Jamaica    | 3<br>(2 – 5)                | 6<br>(4 – 9)                | 5<br>(3 – 7)            | 2<br>(1 – 3)              | 3<br>(2 – 5)              | 1<br>(1 – 2)                | 3<br>(2 – 4)                | 3<br>(1 – 4)                | 0<br>(0 – 0)      |
| Japan      | 28<br>(23 – 34)             | 35<br>(29 – 42)             | 17<br>(14 – 20)         | 13<br>(10 – 16)           | 10<br>(7 – 14)            | 9<br>(6 – 12)               | 26<br>(21 – 31)             | 34<br>(28 – 40)             | 0<br>(0 – 0)      |
| Jordan     | 14<br>(10 – 20)             | 16<br>(9 – 24)              | 17<br>(11 – 23)         | 15<br>(10 – 22)           | 12<br>(8 – 17)            | 6<br>(3 – 10)               | 22<br>(16 – 31)             | 9<br>(5 – 15)               | 0<br>(0 – 0)      |
| Kazakhstan | 41<br>(34 – 51)             | 33<br>(27 – 41)             | 19<br>(15 – 24)         | 21<br>(14 – 30)           | 22<br>(12 – 33)           | 32<br>(21 – 44)             | 41<br>(27 – 54)             | 36<br>(26 – 48)             | 0<br>(0 – 0)      |
| Kenya      | 544<br>(393 – 719)          | 412<br>(288 – 539)          | 305<br>(204 – 410)      | 160<br>(113 – 219)        | 374<br>(266 – 494)        | 259<br>(157 – 383)          | 755<br>(548 – 974)          | 208<br>(139 – 292)          | 24<br>(13 – 36)   |
| Kiribati   | 1<br>(1 – 1)                | 1<br>(1 – 2)                | 1<br>(0 – 1)            | 1<br>(0 – 1)              | 0<br>(0 – 1)              | 1<br>(0 – 1)                | 1<br>(1 – 1)                | 1<br>(0 – 1)                | 0<br>(0 – 0)      |
| Kuwait     | 1<br>(1 – 1)                | 1<br>(1 – 2)                | 1<br>(1 – 1)            | 1<br>(0 – 1)              | 1<br>(0 – 1)              | 0<br>(0 – 1)                | 1<br>(0 – 1)                | 0<br>(0 – 1)                | 0<br>(0 – 0)      |
| Kyrgyzstan | 9<br>(8 – 12)               | 13<br>(10 – 16)             | 8<br>(6 – 11)           | 7<br>(4 – 10)             | 11<br>(7 – 15)            | 10<br>(6 – 13)              | 10<br>(6 – 14)              | 15<br>(11 – 19)             | 0<br>(0 – 0)      |
| Laos       | 162<br>(81 – 269)           | 170<br>(86 – 277)           | 90<br>(30 – 176)        | 69<br>(34 – 113)          | 82<br>(40 – 133)          | 100<br>(46 – 163)           | 177<br>(79 – 296)           | 90<br>(37 – 154)            | 0<br>(0 – 0)      |
| Latvia     | 3<br>(2 – 4)                | 2<br>(1 – 3)                | 2<br>(1 – 2)            | 2<br>(1 – 3)              | 1<br>(1 – 2)              | 1<br>(1 – 2)                | 3<br>(2 – 4)                | 2<br>(1 – 2)                | 0<br>(0 – 0)      |
| Lebanon    | 8<br>(5 – 12)               | 14<br>(9 – 20)              | 9<br>(5 – 14)           | 8<br>(5 – 12)             | 7<br>(4 – 10)             | 4<br>(2 – 7)                | 10<br>(6 – 15)              | 6<br>(3 – 10)               | 0<br>(0 – 0)      |
| Lesotho    | 19<br>(12 – 28)             | 14<br>(8 – 20)              | 14<br>(9 – 20)          | 6<br>(3 – 8)              | 20<br>(13 – 29)           | 13<br>(7 – 21)              | 10<br>(6 – 15)              | 11<br>(7 – 17)              | 0<br>(0 – 0)      |
| Liberia    | 110<br>(76 – 150)           | 128<br>(86 – 173)           | 44<br>(26 – 65)         | 34<br>(21 – 49)           | 47<br>(30 – 68)           | 87<br>(47 – 131)            | 116<br>(82 – 149)           | 56<br>(37 – 82)             | 0<br>(0 – 1)      |

|                  |                      |                      |                     |                     |                     |                      |                      |                     |                  |
|------------------|----------------------|----------------------|---------------------|---------------------|---------------------|----------------------|----------------------|---------------------|------------------|
| Libya            | 6<br>(4 – 11)        | 10<br>(5 – 16)       | 6<br>(3 – 10)       | 5<br>(3 – 9)        | 5<br>(2 – 8)        | 3<br>(1 – 6)         | 7<br>(4 – 12)        | 4<br>(2 – 7)        | 0<br>(0 – 0)     |
| Lithuania        | 3<br>(2 – 4)         | 2<br>(1 – 3)         | 2<br>(1 – 3)        | 2<br>(1 – 2)        | 1<br>(1 – 2)        | 1<br>(1 – 2)         | 3<br>(2 – 4)         | 2<br>(1 – 2)        | 0<br>(0 – 0)     |
| Luxembourg       | 0<br>(0 – 0)         | 0<br>(0 – 0)         | 0<br>(0 – 0)        | 0<br>(0 – 0)        | 0<br>(0 – 0)        | 0<br>(0 – 0)         | 0<br>(0 – 0)         | 0<br>(0 – 0)        | 0<br>(0 – 0)     |
| Macedonia        | 2<br>(1 – 2)         | 1<br>(1 – 2)         | 1<br>(1 – 1)        | 1<br>(1 – 2)        | 1<br>(0 – 1)        | 1<br>(0 – 1)         | 1<br>(1 – 2)         | 1<br>(0 – 1)        | 0<br>(0 – 0)     |
| Madagascar       | 318<br>(217 – 431)   | 227<br>(150 – 308)   | 172<br>(123 – 239)  | 93<br>(64 – 124)    | 214<br>(152 – 287)  | 143<br>(88 – 206)    | 431<br>(322 – 531)   | 120<br>(69 – 166)   | 2<br>(1 – 2)     |
| Malawi           | 484<br>(352 – 645)   | 339<br>(217 – 474)   | 245<br>(172 – 329)  | 136<br>(91 – 182)   | 305<br>(209 – 421)  | 204<br>(111 – 302)   | 653<br>(472 – 851)   | 177<br>(97 – 262)   | 80<br>(48 – 115) |
| Malaysia         | 72<br>(48 – 102)     | 76<br>(47 – 107)     | 45<br>(21 – 75)     | 34<br>(21 – 51)     | 67<br>(47 – 95)     | 53<br>(31 – 85)      | 116<br>(67 – 170)    | 58<br>(39 – 83)     | 0<br>(0 – 0)     |
| Maldives         | 4<br>(3 – 5)         | 4<br>(3 – 6)         | 2<br>(1 – 4)        | 2<br>(1 – 2)        | 2<br>(1 – 3)        | 3<br>(2 – 4)         | 4<br>(3 – 6)         | 2<br>(1 – 3)        | 0<br>(0 – 0)     |
| Mali             | 405<br>(302 – 513)   | 469<br>(339 – 615)   | 181<br>(102 – 261)  | 132<br>(89 – 186)   | 179<br>(115 – 255)  | 310<br>(196 – 440)   | 418<br>(294 – 543)   | 224<br>(159 – 301)  | 3<br>(2 – 5)     |
| Malta            | 0<br>(0 – 0)         | 0<br>(0 – 0)         | 0<br>(0 – 0)        | 0<br>(0 – 0)        | 0<br>(0 – 0)        | 0<br>(0 – 0)         | 0<br>(0 – 0)         | 0<br>(0 – 0)        | 0<br>(0 – 0)     |
| Marshall Islands | 0<br>(0 – 0)         | 0<br>(0 – 0)         | 0<br>(0 – 0)        | 0<br>(0 – 0)        | 0<br>(0 – 0)        | 0<br>(0 – 0)         | 0<br>(0 – 0)         | 0<br>(0 – 0)        | 0<br>(0 – 0)     |
| Mauritania       | 100<br>(74 – 130)    | 115<br>(84 – 154)    | 43<br>(27 – 60)     | 32<br>(21 – 44)     | 47<br>(30 – 67)     | 79<br>(52 – 112)     | 108<br>(79 – 142)    | 55<br>(34 – 81)     | 0<br>(0 – 0)     |
| Mauritius        | 3<br>(2 – 4)         | 2<br>(1 – 2)         | 2<br>(1 – 2)        | 1<br>(1 – 1)        | 2<br>(1 – 2)        | 1<br>(1 – 2)         | 3<br>(2 – 4)         | 2<br>(1 – 2)        | 0<br>(0 – 0)     |
| Mexico           | 192<br>(181 – 203)   | 343<br>(326 – 362)   | 329<br>(312 – 350)  | 138<br>(128 – 148)  | 155<br>(145 – 166)  | 97<br>(86 – 110)     | 357<br>(338 – 377)   | 159<br>(149 – 173)  | 0<br>(0 – 0)     |
| Moldova          | 9<br>(8 – 12)        | 6<br>(5 – 7)         | 5<br>(3 – 7)        | 5<br>(3 – 7)        | 8<br>(6 – 10)       | 4<br>(3 – 6)         | 7<br>(5 – 9)         | 6<br>(4 – 8)        | 0<br>(0 – 0)     |
| Mongolia         | 15<br>(10 – 21)      | 17<br>(12 – 23)      | 10<br>(6 – 15)      | 8<br>(5 – 12)       | 16<br>(11 – 23)     | 13<br>(9 – 18)       | 16<br>(10 – 23)      | 12<br>(7 – 18)      | 0<br>(0 – 0)     |
| Montenegro       | 0<br>(0 – 0)         | 0<br>(0 – 0)         | 0<br>(0 – 0)        | 0<br>(0 – 0)        | 0<br>(0 – 0)        | 0<br>(0 – 0)         | 0<br>(0 – 0)         | 0<br>(0 – 0)        | 0<br>(0 – 0)     |
| Morocco          | 302<br>(210 – 428)   | 372<br>(249 – 512)   | 375<br>(278 – 492)  | 245<br>(152 – 353)  | 135<br>(68 – 197)   | 111<br>(47 – 184)    | 271<br>(167 – 386)   | 154<br>(62 – 274)   | 0<br>(0 – 0)     |
| Mozambique       | 351<br>(241 – 497)   | 273<br>(171 – 397)   | 226<br>(153 – 313)  | 107<br>(68 – 154)   | 335<br>(230 – 459)  | 183<br>(101 – 292)   | 494<br>(335 – 669)   | 212<br>(134 – 306)  | 3<br>(2 – 6)     |
| Myanmar          | 1690<br>(851 – 2990) | 1685<br>(916 – 2835) | 935<br>(392 – 1779) | 716<br>(368 – 1251) | 820<br>(366 – 1521) | 1049<br>(435 – 1927) | 1673<br>(642 – 3188) | 875<br>(415 – 1525) | 1<br>(0 – 2)     |
| Namibia          | 16<br>(9 – 23)       | 12<br>(6 – 18)       | 12<br>(7 – 17)      | 5<br>(3 – 7)        | 15<br>(9 – 22)      | 10<br>(5 – 16)       | 9<br>(5 – 13)        | 10<br>(6 – 14)      | 0<br>(0 – 0)     |
| Nepal            | 387<br>(251 – 558)   | 486<br>(282 – 762)   | 391<br>(244 – 549)  | 185<br>(120 – 256)  | 194<br>(118 – 282)  | 324<br>(191 – 479)   | 640<br>(383 – 970)   | 400<br>(267 – 571)  | 0<br>(0 – 0)     |
| Netherlands      | 3<br>(2 – 4)         | 2<br>(1 – 3)         | 5<br>(4 – 7)        | 2<br>(1 – 2)        | 3<br>(2 – 4)        | 1<br>(1 – 2)         | 5<br>(3 – 6)         | 2<br>(2 – 3)        | 0<br>(0 – 0)     |
| New Zealand      | 1<br>(0 – 1)         | 1<br>(1 – 1)         | 1<br>(1 – 2)        | 1<br>(1 – 1)        | 1<br>(0 – 1)        | 0<br>(0 – 1)         | 2<br>(1 – 2)         | 1<br>(1 – 1)        | 0<br>(0 – 0)     |

|                                     |                       |                       |                       |                       |                      |                       |                       |                       |                 |
|-------------------------------------|-----------------------|-----------------------|-----------------------|-----------------------|----------------------|-----------------------|-----------------------|-----------------------|-----------------|
| Nicaragua                           | 23<br>(18 – 28)       | 29<br>(24 – 35)       | 23<br>(18 – 28)       | 12<br>(8 – 17)        | 21<br>(16 – 26)      | 8<br>(5 – 13)         | 20<br>(13 – 27)       | 11<br>(8 – 16)        | 0<br>(0 – 0)    |
| Niger                               | 391<br>(288 – 510)    | 445<br>(316 – 592)    | 167<br>(97 – 250)     | 120<br>(67 – 182)     | 166<br>(94 – 241)    | 306<br>(178 – 482)    | 414<br>(303 – 545)    | 203<br>(118 – 294)    | 1<br>(0 – 1)    |
| Nigeria                             | 3748<br>(2426 – 5120) | 3799<br>(2417 – 5249) | 1428<br>(861 – 2320)  | 1710<br>(1095 – 2416) | 1516<br>(948 – 2258) | 2989<br>(1704 – 4498) | 4018<br>(2713 – 5602) | 1944<br>(1188 – 2831) | 39<br>(19 – 62) |
| North Korea                         | 61<br>(27 – 111)      | 119<br>(48 – 220)     | 46<br>(19 – 86)       | 64<br>(29 – 115)      | 38<br>(17 – 71)      | 51<br>(23 – 98)       | 86<br>(37 – 159)      | 80<br>(40 – 152)      | 0<br>(0 – 0)    |
| Norway                              | 1<br>(0 – 1)          | 0<br>(0 – 1)          | 0<br>(0 – 1)          | 0<br>(0 – 0)          | 0<br>(0 – 1)         | 0<br>(0 – 0)          | 1<br>(0 – 1)          | 0<br>(0 – 1)          | 0<br>(0 – 0)    |
| Oman                                | 3<br>(2 – 6)          | 7<br>(4 – 13)         | 3<br>(2 – 6)          | 3<br>(2 – 6)          | 4<br>(2 – 6)         | 2<br>(1 – 4)          | 5<br>(2 – 8)          | 3<br>(1 – 5)          | 0<br>(0 – 0)    |
| Pakistan                            | 2270<br>(1529 – 3115) | 2912<br>(1822 – 4166) | 2375<br>(1569 – 3322) | 1126<br>(790 – 1505)  | 1091<br>(556 – 1599) | 1929<br>(1196 – 2808) | 4497<br>(3046 – 6175) | 2440<br>(1546 – 3376) | 0<br>(0 – 0)    |
| Palestine                           | 3<br>(2 – 5)          | 5<br>(2 – 8)          | 3<br>(1 – 5)          | 2<br>(1 – 4)          | 2<br>(1 – 4)         | 1<br>(1 – 3)          | 3<br>(2 – 6)          | 2<br>(1 – 4)          | 0<br>(0 – 0)    |
| Panama                              | 6<br>(5 – 8)          | 6<br>(5 – 9)          | 6<br>(4 – 8)          | 3<br>(2 – 5)          | 5<br>(4 – 7)         | 2<br>(1 – 3)          | 7<br>(5 – 9)          | 5<br>(3 – 7)          | 0<br>(0 – 0)    |
| Papua New Guinea                    | 185<br>(104 – 316)    | 231<br>(131 – 394)    | 118<br>(65 – 207)     | 109<br>(64 – 182)     | 88<br>(49 – 152)     | 122<br>(61 – 216)     | 185<br>(98 – 306)     | 107<br>(58 – 184)     | 0<br>(0 – 0)    |
| Paraguay                            | 35<br>(28 – 42)       | 48<br>(41 – 55)       | 33<br>(27 – 39)       | 10<br>(8 – 13)        | 30<br>(25 – 36)      | 17<br>(11 – 23)       | 18<br>(14 – 24)       | 17<br>(13 – 22)       | 0<br>(0 – 0)    |
| Peru                                | 83<br>(69 – 99)       | 221<br>(190 – 258)    | 78<br>(65 – 93)       | 47<br>(32 – 62)       | 126<br>(107 – 148)   | 129<br>(95 – 169)     | 96<br>(73 – 123)      | 61<br>(46 – 81)       | 0<br>(0 – 0)    |
| Philippines                         | 210<br>(178 – 249)    | 746<br>(648 – 855)    | 311<br>(268 – 355)    | 133<br>(80 – 192)     | 187<br>(146 – 227)   | 274<br>(189 – 365)    | 335<br>(286 – 386)    | 174<br>(100 – 258)    | 0<br>(0 – 0)    |
| Poland                              | 29<br>(24 – 34)       | 31<br>(26 – 38)       | 13<br>(10 – 17)       | 17<br>(12 – 24)       | 30<br>(25 – 36)      | 20<br>(10 – 29)       | 29<br>(22 – 37)       | 8<br>(5 – 14)         | 0<br>(0 – 0)    |
| Portugal                            | 6<br>(5 – 8)          | 3<br>(2 – 4)          | 3<br>(2 – 4)          | 2<br>(1 – 2)          | 3<br>(2 – 5)         | 1<br>(1 – 2)          | 3<br>(2 – 4)          | 2<br>(1 – 3)          | 0<br>(0 – 0)    |
| Qatar                               | 1<br>(0 – 1)          | 1<br>(1 – 2)          | 1<br>(0 – 1)          | 1<br>(0 – 1)          | 0<br>(0 – 1)         | 0<br>(0 – 1)          | 1<br>(0 – 1)          | 0<br>(0 – 1)          | 0<br>(0 – 0)    |
| Romania                             | 113<br>(90 – 139)     | 30<br>(22 – 39)       | 19<br>(13 – 28)       | 51<br>(35 – 70)       | 32<br>(25 – 39)      | 40<br>(24 – 61)       | 54<br>(35 – 75)       | 74<br>(50 – 97)       | 0<br>(0 – 0)    |
| Russia                              | 292<br>(248 – 345)    | 101<br>(83 – 121)     | 78<br>(61 – 95)       | 130<br>(80 – 179)     | 54<br>(32 – 78)      | 101<br>(65 – 145)     | 244<br>(190 – 302)    | 96<br>(50 – 143)      | 0<br>(0 – 0)    |
| Rwanda                              | 363<br>(252 – 479)    | 277<br>(182 – 383)    | 192<br>(130 – 264)    | 105<br>(74 – 140)     | 241<br>(171 – 316)   | 175<br>(115 – 250)    | 494<br>(370 – 640)    | 135<br>(84 – 195)     | 35<br>(20 – 51) |
| Saint Lucia                         | 0<br>(0 – 0)          | 0<br>(0 – 0)          | 0<br>(0 – 1)          | 0<br>(0 – 0)          | 0<br>(0 – 0)         | 0<br>(0 – 0)          | 0<br>(0 – 0)          | 0<br>(0 – 0)          | 0<br>(0 – 0)    |
| Saint Vincent and the<br>Grenadines | 0<br>(0 – 0)          | 0<br>(0 – 0)          | 0<br>(0 – 0)          | 0<br>(0 – 0)          | 0<br>(0 – 0)         | 0<br>(0 – 0)          | 0<br>(0 – 0)          | 0<br>(0 – 0)          | 0<br>(0 – 0)    |
| Samoa                               | 1<br>(0 – 1)          | 1<br>(0 – 1)          | 0<br>(0 – 1)          | 0<br>(0 – 1)          | 0<br>(0 – 0)         | 0<br>(0 – 1)          | 1<br>(0 – 1)          | 0<br>(0 – 1)          | 0<br>(0 – 0)    |
| Saudi Arabia                        | 13<br>(7 – 22)        | 15<br>(8 – 27)        | 9<br>(4 – 16)         | 8<br>(4 – 15)         | 6<br>(3 – 11)        | 6<br>(2 – 12)         | 22<br>(12 – 37)       | 9<br>(4 – 15)         | 0<br>(0 – 0)    |
| Senegal                             | 296<br>(223 – 381)    | 360<br>(251 – 467)    | 136<br>(93 – 185)     | 91<br>(57 – 125)      | 137<br>(95 – 191)    | 230<br>(143 – 331)    | 315<br>(226 – 414)    | 157<br>(100 – 216)    | 1<br>(0 – 1)    |

|                            |                      |                     |                    |                    |                    |                    |                       |                    |                  |
|----------------------------|----------------------|---------------------|--------------------|--------------------|--------------------|--------------------|-----------------------|--------------------|------------------|
| Serbia                     | 4<br>(3 – 6)         | 3<br>(2 – 5)        | 2<br>(1 – 4)       | 3<br>(1 – 5)       | 2<br>(1 – 3)       | 3<br>(1 – 4)       | 3<br>(2 – 5)          | 2<br>(1 – 4)       | 0<br>(0 – 0)     |
| Seychelles                 | 0<br>(0 – 0)         | 0<br>(0 – 0)        | 0<br>(0 – 0)       | 0<br>(0 – 0)       | 0<br>(0 – 0)       | 0<br>(0 – 0)       | 0<br>(0 – 0)          | 0<br>(0 – 0)       | 0<br>(0 – 0)     |
| Sierra Leone               | 162<br>(110 – 221)   | 199<br>(132 – 268)  | 68<br>(38 – 109)   | 50<br>(30 – 77)    | 66<br>(34 – 104)   | 132<br>(78 – 198)  | 175<br>(119 – 248)    | 88<br>(49 – 134)   | 0<br>(0 – 0)     |
| Singapore                  | 1<br>(1 – 1)         | 1<br>(1 – 2)        | 1<br>(0 – 1)       | 0<br>(0 – 1)       | 1<br>(0 – 1)       | 0<br>(0 – 0)       | 1<br>(1 – 2)          | 1<br>(0 – 1)       | 0<br>(0 – 0)     |
| Slovakia                   | 3<br>(2 – 3)         | 2<br>(1 – 2)        | 1<br>(1 – 2)       | 2<br>(1 – 2)       | 1<br>(1 – 2)       | 1<br>(1 – 2)       | 2<br>(1 – 3)          | 1<br>(0 – 1)       | 0<br>(0 – 0)     |
| Slovenia                   | 1<br>(0 – 1)         | 0<br>(0 – 0)        | 0<br>(0 – 0)       | 0<br>(0 – 1)       | 0<br>(0 – 0)       | 0<br>(0 – 0)       | 0<br>(0 – 1)          | 0<br>(0 – 0)       | 0<br>(0 – 0)     |
| Solomon Islands            | 5<br>(2 – 10)        | 6<br>(3 – 11)       | 3<br>(1 – 6)       | 3<br>(1 – 6)       | 3<br>(1 – 4)       | 4<br>(2 – 7)       | 5<br>(2 – 9)          | 3<br>(1 – 5)       | 0<br>(0 – 0)     |
| Somalia                    | 299<br>(162 – 491)   | 206<br>(105 – 345)  | 151<br>(79 – 255)  | 84<br>(46 – 139)   | 183<br>(94 – 303)  | 141<br>(66 – 247)  | 398<br>(209 – 662)    | 109<br>(57 – 191)  | 0<br>(0 – 1)     |
| South Africa               | 199<br>(134 – 281)   | 192<br>(129 – 264)  | 254<br>(168 – 341) | 66<br>(40 – 97)    | 215<br>(137 – 294) | 160<br>(96 – 249)  | 173<br>(110 – 242)    | 141<br>(92 – 196)  | 2<br>(1 – 2)     |
| South Korea                | 12<br>(9 – 15)       | 25<br>(20 – 31)     | 22<br>(18 – 27)    | 9<br>(7 – 12)      | 29<br>(24 – 36)    | 6<br>(4 – 9)       | 32<br>(24 – 40)       | 9<br>(5 – 14)      | 0<br>(0 – 0)     |
| South Sudan                | 393<br>(213 – 611)   | 270<br>(136 – 450)  | 201<br>(103 – 324) | 112<br>(60 – 176)  | 270<br>(141 – 430) | 185<br>(89 – 335)  | 547<br>(295 – 851)    | 153<br>(78 – 257)  | 2<br>(1 – 3)     |
| Spain                      | 13<br>(11 – 16)      | 5<br>(4 – 7)        | 4<br>(3 – 6)       | 4<br>(3 – 5)       | 6<br>(5 – 8)       | 3<br>(2 – 4)       | 7<br>(6 – 9)          | 4<br>(3 – 5)       | 0<br>(0 – 0)     |
| Sri Lanka                  | 47<br>(38 – 59)      | 48<br>(36 – 61)     | 25<br>(17 – 35)    | 17<br>(12 – 24)    | 24<br>(16 – 33)    | 30<br>(18 – 44)    | 54<br>(40 – 69)       | 13<br>(7 – 20)     | 0<br>(0 – 0)     |
| Sudan                      | 484<br>(314 – 699)   | 760<br>(488 – 1032) | 497<br>(274 – 711) | 372<br>(196 – 590) | 402<br>(243 – 597) | 243<br>(82 – 401)  | 502<br>(286 – 727)    | 292<br>(127 – 473) | 0<br>(0 – 1)     |
| Suriname                   | 1<br>(1 – 2)         | 1<br>(1 – 2)        | 1<br>(1 – 2)       | 1<br>(0 – 1)       | 1<br>(1 – 1)       | 0<br>(0 – 1)       | 1<br>(1 – 1)          | 1<br>(0 – 1)       | 0<br>(0 – 0)     |
| Swaziland                  | 7<br>(5 – 10)        | 6<br>(4 – 9)        | 5<br>(3 – 7)       | 2<br>(1 – 3)       | 7<br>(4 – 11)      | 5<br>(3 – 7)       | 4<br>(3 – 6)          | 4<br>(3 – 6)       | 0<br>(0 – 0)     |
| Sweden                     | 2<br>(1 – 2)         | 1<br>(1 – 1)        | 1<br>(1 – 1)       | 1<br>(0 – 1)       | 1<br>(1 – 1)       | 1<br>(0 – 1)       | 2<br>(1 – 2)          | 1<br>(1 – 1)       | 0<br>(0 – 0)     |
| Switzerland                | 1<br>(1 – 1)         | 1<br>(0 – 1)        | 1<br>(1 – 1)       | 0<br>(0 – 1)       | 1<br>(0 – 1)       | 0<br>(0 – 0)       | 1<br>(1 – 1)          | 1<br>(0 – 1)       | 0<br>(0 – 0)     |
| Syria                      | 64<br>(39 – 97)      | 109<br>(68 – 159)   | 74<br>(42 – 110)   | 55<br>(27 – 87)    | 52<br>(28 – 75)    | 33<br>(13 – 58)    | 77<br>(49 – 115)      | 49<br>(25 – 78)    | 0<br>(0 – 0)     |
| São Tomé and Príncipe      | 2<br>(1 – 3)         | 3<br>(2 – 4)        | 1<br>(1 – 2)       | 1<br>(0 – 1)       | 1<br>(1 – 2)       | 2<br>(1 – 3)       | 2<br>(1 – 3)          | 1<br>(1 – 2)       | 0<br>(0 – 0)     |
| Taiwan (Province of China) | 16<br>(9 – 24)       | 13<br>(6 – 21)      | 9<br>(4 – 13)      | 10<br>(5 – 18)     | 10<br>(6 – 16)     | 10<br>(4 – 18)     | 20<br>(13 – 33)       | 13<br>(7 – 22)     | 0<br>(0 – 0)     |
| Tajikistan                 | 9<br>(6 – 12)        | 21<br>(17 – 26)     | 16<br>(12 – 20)    | 15<br>(9 – 21)     | 21<br>(13 – 29)    | 25<br>(16 – 34)    | 26<br>(17 – 35)       | 21<br>(14 – 30)    | 0<br>(0 – 0)     |
| Tanzania                   | 1198<br>(901 – 1541) | 814<br>(570 – 1084) | 505<br>(346 – 672) | 312<br>(227 – 409) | 560<br>(390 – 790) | 517<br>(294 – 767) | 1499<br>(1100 – 1974) | 324<br>(185 – 494) | 72<br>(41 – 105) |
| Thailand                   | 120<br>(97 – 148)    | 88<br>(70 – 108)    | 38<br>(28 – 50)    | 56<br>(44 – 69)    | 44<br>(32 – 57)    | 53<br>(31 – 78)    | 31<br>(20 – 49)       | 26<br>(15 – 39)    | 1<br>(0 – 1)     |

|                      |                    |                    |                    |                    |                    |                    |                    |                    |                  |
|----------------------|--------------------|--------------------|--------------------|--------------------|--------------------|--------------------|--------------------|--------------------|------------------|
| The Bahamas          | 1<br>(0 – 1)       | 1<br>(0 – 1)       | 1<br>(0 – 1)       | 0<br>(0 – 1)       | 0<br>(0 – 1)       | 0<br>(0 – 0)       | 1<br>(0 – 1)       | 0<br>(0 – 1)       | 0<br>(0 – 0)     |
| The Gambia           | 36<br>(18 – 58)    | 43<br>(20 – 71)    | 16<br>(7 – 28)     | 11<br>(5 – 20)     | 15<br>(7 – 27)     | 26<br>(11 – 46)    | 37<br>(18 – 62)    | 20<br>(9 – 35)     | 0<br>(0 – 0)     |
| Timor-Leste          | 36<br>(23 – 52)    | 38<br>(25 – 52)    | 21<br>(10 – 37)    | 15<br>(10 – 21)    | 22<br>(14 – 30)    | 23<br>(15 – 33)    | 40<br>(24 – 60)    | 20<br>(12 – 32)    | 0<br>(0 – 0)     |
| Togo                 | 139<br>(96 – 184)  | 171<br>(120 – 232) | 55<br>(35 – 82)    | 45<br>(21 – 64)    | 61<br>(33 – 92)    | 110<br>(71 – 158)  | 151<br>(111 – 201) | 72<br>(47 – 103)   | 1<br>(1 – 2)     |
| Tonga                | 1<br>(1 – 2)       | 1<br>(1 – 2)       | 1<br>(0 – 1)       | 1<br>(0 – 1)       | 0<br>(0 – 1)       | 1<br>(0 – 1)       | 1<br>(1 – 1)       | 0<br>(0 – 1)       | 0<br>(0 – 0)     |
| Trinidad and Tobago  | 3<br>(3 – 4)       | 3<br>(2 – 4)       | 3<br>(2 – 4)       | 1<br>(1 – 2)       | 2<br>(1 – 2)       | 1<br>(1 – 1)       | 2<br>(1 – 3)       | 1<br>(1 – 2)       | 0<br>(0 – 0)     |
| Tunisia              | 17<br>(10 – 26)    | 27<br>(16 – 39)    | 17<br>(10 – 27)    | 15<br>(8 – 23)     | 12<br>(7 – 18)     | 8<br>(4 – 14)      | 17<br>(9 – 29)     | 10<br>(3 – 18)     | 0<br>(0 – 0)     |
| Turkey               | 105<br>(71 – 145)  | 78<br>(51 – 114)   | 135<br>(95 – 185)  | 66<br>(39 – 97)    | 101<br>(66 – 148)  | 38<br>(17 – 66)    | 74<br>(40 – 120)   | 66<br>(31 – 110)   | 0<br>(0 – 0)     |
| Turkmenistan         | 8<br>(6 – 10)      | 14<br>(11 – 17)    | 8<br>(6 – 11)      | 8<br>(5 – 11)      | 12<br>(8 – 17)     | 13<br>(7 – 18)     | 16<br>(12 – 21)    | 11<br>(7 – 16)     | 0<br>(0 – 0)     |
| Uganda               | 496<br>(334 – 693) | 354<br>(226 – 501) | 266<br>(170 – 395) | 146<br>(98 – 206)  | 329<br>(219 – 464) | 248<br>(139 – 403) | 676<br>(483 – 905) | 198<br>(109 – 307) | 79<br>(45 – 119) |
| Ukraine              | 67<br>(54 – 82)    | 39<br>(32 – 48)    | 19<br>(15 – 25)    | 38<br>(25 – 52)    | 28<br>(19 – 38)    | 29<br>(19 – 41)    | 59<br>(39 – 77)    | 46<br>(31 – 64)    | 0<br>(0 – 0)     |
| United Arab Emirates | 3<br>(1 – 7)       | 5<br>(2 – 10)      | 3<br>(2 – 7)       | 3<br>(1 – 6)       | 2<br>(1 – 4)       | 2<br>(1 – 4)       | 3<br>(2 – 7)       | 2<br>(1 – 4)       | 0<br>(0 – 0)     |
| United Kingdom       | 16<br>(14 – 17)    | 9<br>(8 – 10)      | 10<br>(9 – 12)     | 6<br>(5 – 7)       | 9<br>(8 – 11)      | 5<br>(4 – 6)       | 16<br>(15 – 18)    | 8<br>(7 – 10)      | 0<br>(0 – 0)     |
| United States        | 100<br>(86 – 116)  | 58<br>(49 – 67)    | 54<br>(46 – 64)    | 33<br>(20 – 50)    | 73<br>(62 – 87)    | 35<br>(26 – 48)    | 110<br>(95 – 128)  | 64<br>(55 – 74)    | 0<br>(0 – 0)     |
| Uruguay              | 5<br>(4 – 7)       | 2<br>(2 – 3)       | 3<br>(2 – 4)       | 1<br>(1 – 2)       | 4<br>(3 – 5)       | 1<br>(1 – 2)       | 3<br>(2 – 4)       | 3<br>(2 – 4)       | 0<br>(0 – 0)     |
| Uzbekistan           | 20<br>(16 – 25)    | 61<br>(51 – 73)    | 19<br>(15 – 26)    | 28<br>(19 – 38)    | 56<br>(38 – 76)    | 57<br>(39 – 76)    | 87<br>(68 – 106)   | 23<br>(13 – 36)    | 0<br>(0 – 0)     |
| Vanuatu              | 2<br>(1 – 3)       | 2<br>(1 – 4)       | 1<br>(0 – 2)       | 1<br>(0 – 2)       | 1<br>(0 – 1)       | 1<br>(0 – 2)       | 2<br>(1 – 3)       | 1<br>(0 – 2)       | 0<br>(0 – 0)     |
| Venezuela            | 64<br>(55 – 74)    | 50<br>(42 – 57)    | 72<br>(62 – 83)    | 26<br>(16 – 38)    | 61<br>(52 – 71)    | 23<br>(13 – 33)    | 54<br>(37 – 72)    | 27<br>(22 – 32)    | 0<br>(0 – 0)     |
| Vietnam              | 554<br>(299 – 870) | 446<br>(262 – 685) | 233<br>(95 – 429)  | 229<br>(142 – 354) | 353<br>(220 – 525) | 320<br>(180 – 487) | 634<br>(320 – 976) | 500<br>(317 – 748) | 0<br>(0 – 0)     |
| Yemen                | 272<br>(137 – 442) | 460<br>(223 – 766) | 293<br>(133 – 464) | 254<br>(112 – 420) | 226<br>(106 – 370) | 131<br>(57 – 259)  | 315<br>(153 – 510) | 195<br>(89 – 336)  | 0<br>(0 – 0)     |
| Zambia               | 232<br>(153 – 324) | 164<br>(107 – 235) | 123<br>(76 – 180)  | 66<br>(42 – 96)    | 154<br>(94 – 223)  | 98<br>(58 – 152)   | 296<br>(194 – 408) | 91<br>(54 – 138)   | 57<br>(34 – 82)  |
| Zimbabwe             | 150<br>(109 – 198) | 96<br>(68 – 131)   | 72<br>(44 – 100)   | 43<br>(30 – 61)    | 133<br>(93 – 177)  | 86<br>(47 – 132)   | 53<br>(34 – 78)    | 59<br>(42 – 82)    | 25<br>(15 – 36)  |

**Appendix Table 10. Maternal deaths by cause for 188 countries, 2013**

|                          | Cause of death       |                       |                      |                     |                     |                       |                      |                     |                  |
|--------------------------|----------------------|-----------------------|----------------------|---------------------|---------------------|-----------------------|----------------------|---------------------|------------------|
|                          | Abortion             | Haemorrhage           | Hypertension         | Obstructed Labor    | Sepsis              | Late                  | Other direct         | Indirect            | HIV              |
| Afghanistan              | 1185<br>(627 – 2091) | 1630<br>(858 – 2848)  | 1190<br>(630 – 2000) | 792<br>(396 – 1406) | 829<br>(436 – 1455) | 1042<br>(499 – 1877)  | 1292<br>(669 – 2268) | 818<br>(364 – 1524) | 0<br>(0 – 0)     |
| Albania                  | 1<br>(0 – 1)         | 0<br>(0 – 1)          | 0<br>(0 – 1)         | 0<br>(0 – 1)        | 0<br>(0 – 0)        | 0<br>(0 – 1)          | 1<br>(0 – 1)         | 0<br>(0 – 1)        | 0<br>(0 – 0)     |
| Algeria                  | 54<br>(29 – 90)      | 98<br>(61 – 145)      | 85<br>(58 – 119)     | 65<br>(40 – 94)     | 35<br>(21 – 53)     | 40<br>(21 – 63)       | 61<br>(36 – 98)      | 32<br>(13 – 59)     | 0<br>(0 – 0)     |
| Andorra                  | 0<br>(0 – 0)         | 0<br>(0 – 0)          | 0<br>(0 – 0)         | 0<br>(0 – 0)        | 0<br>(0 – 0)        | 0<br>(0 – 0)          | 0<br>(0 – 0)         | 0<br>(0 – 0)        | 0<br>(0 – 0)     |
| Angola                   | 533<br>(318 – 853)   | 434<br>(253 – 679)    | 323<br>(174 – 523)   | 176<br>(102 – 277)  | 263<br>(139 – 437)  | 445<br>(219 – 758)    | 576<br>(324 – 965)   | 246<br>(141 – 398)  | 31<br>(16 – 54)  |
| Antigua and Barbuda      | 0<br>(0 – 0)         | 0<br>(0 – 0)          | 0<br>(0 – 0)         | 0<br>(0 – 0)        | 0<br>(0 – 0)        | 0<br>(0 – 0)          | 0<br>(0 – 0)         | 0<br>(0 – 0)        | 0<br>(0 – 0)     |
| Argentina                | 82<br>(66 – 101)     | 39<br>(31 – 49)       | 37<br>(28 – 48)      | 24<br>(16 – 32)     | 64<br>(51 – 79)     | 26<br>(19 – 33)       | 42<br>(33 – 52)      | 72<br>(58 – 89)     | 0<br>(0 – 1)     |
| Armenia                  | 1<br>(1 – 1)         | 1<br>(1 – 2)          | 1<br>(1 – 1)         | 1<br>(0 – 1)        | 1<br>(0 – 1)        | 1<br>(1 – 2)          | 1<br>(1 – 2)         | 1<br>(1 – 1)        | 0<br>(0 – 0)     |
| Australia                | 2<br>(1 – 2)         | 2<br>(1 – 2)          | 2<br>(2 – 3)         | 2<br>(1 – 2)        | 2<br>(1 – 2)        | 1<br>(1 – 2)          | 3<br>(2 – 5)         | 2<br>(1 – 3)        | 0<br>(0 – 0)     |
| Austria                  | 1<br>(0 – 1)         | 0<br>(0 – 0)          | 0<br>(0 – 1)         | 0<br>(0 – 0)        | 0<br>(0 – 0)        | 0<br>(0 – 0)          | 1<br>(0 – 1)         | 0<br>(0 – 0)        | 0<br>(0 – 0)     |
| Azerbaijan               | 4<br>(2 – 6)         | 7<br>(5 – 10)         | 4<br>(2 – 6)         | 4<br>(2 – 6)        | 5<br>(3 – 7)        | 6<br>(3 – 9)          | 7<br>(4 – 10)        | 5<br>(2 – 8)        | 0<br>(0 – 0)     |
| Bahrain                  | 1<br>(0 – 1)         | 1<br>(1 – 1)          | 1<br>(0 – 1)         | 0<br>(0 – 1)        | 0<br>(0 – 1)        | 0<br>(0 – 1)          | 1<br>(0 – 1)         | 0<br>(0 – 1)        | 0<br>(0 – 0)     |
| Bangladesh               | 669<br>(383 – 1029)  | 1690<br>(1092 – 2459) | 1120<br>(756 – 1560) | 338<br>(216 – 502)  | 259<br>(141 – 400)  | 1867<br>(1213 – 2671) | 1118<br>(586 – 1750) | 662<br>(371 – 990)  | 0<br>(0 – 0)     |
| Barbados                 | 0<br>(0 – 1)         | 0<br>(0 – 0)          | 0<br>(0 – 1)         | 0<br>(0 – 0)        | 0<br>(0 – 0)        | 0<br>(0 – 0)          | 0<br>(0 – 0)         | 0<br>(0 – 0)        | 0<br>(0 – 0)     |
| Belarus                  | 2<br>(2 – 3)         | 1<br>(1 – 2)          | 1<br>(0 – 2)         | 1<br>(1 – 2)        | 1<br>(0 – 1)        | 1<br>(0 – 2)          | 2<br>(1 – 3)         | 1<br>(1 – 2)        | 0<br>(0 – 0)     |
| Belgium                  | 2<br>(1 – 3)         | 1<br>(1 – 1)          | 1<br>(1 – 2)         | 1<br>(0 – 1)        | 1<br>(1 – 1)        | 1<br>(0 – 1)          | 2<br>(1 – 2)         | 1<br>(1 – 1)        | 0<br>(0 – 0)     |
| Belize                   | 1<br>(0 – 1)         | 1<br>(0 – 1)          | 1<br>(0 – 1)         | 0<br>(0 – 1)        | 0<br>(0 – 1)        | 0<br>(0 – 1)          | 1<br>(0 – 1)         | 0<br>(0 – 1)        | 0<br>(0 – 0)     |
| Benin                    | 225<br>(139 – 339)   | 241<br>(156 – 355)    | 95<br>(52 – 147)     | 58<br>(35 – 87)     | 70<br>(43 – 104)    | 195<br>(119 – 294)    | 229<br>(148 – 331)   | 124<br>(75 – 181)   | 5<br>(3 – 8)     |
| Bhutan                   | 5<br>(2 – 9)         | 5<br>(2 – 10)         | 5<br>(2 – 9)         | 2<br>(1 – 4)        | 2<br>(1 – 4)        | 7<br>(3 – 12)         | 10<br>(4 – 17)       | 5<br>(2 – 9)        | 0<br>(0 – 0)     |
| Bolivia                  | 92<br>(52 – 142)     | 67<br>(38 – 106)      | 61<br>(35 – 96)      | 34<br>(20 – 53)     | 50<br>(28 – 78)     | 108<br>(62 – 168)     | 52<br>(29 – 83)      | 33<br>(19 – 50)     | 0<br>(0 – 0)     |
| Bosnia and Herzegovina   | 1<br>(1 – 1)         | 1<br>(0 – 1)          | 0<br>(0 – 1)         | 0<br>(0 – 1)        | 0<br>(0 – 1)        | 0<br>(0 – 1)          | 1<br>(0 – 1)         | 0<br>(0 – 1)        | 0<br>(0 – 0)     |
| Botswana                 | 37<br>(15 – 66)      | 25<br>(10 – 45)       | 33<br>(13 – 59)      | 13<br>(5 – 25)      | 23<br>(10 – 42)     | 27<br>(11 – 50)       | 24<br>(10 – 46)      | 26<br>(11 – 48)     | 20<br>(9 – 35)   |
| Brazil                   | 194<br>(146 – 250)   | 169<br>(126 – 220)    | 320<br>(242 – 410)   | 62<br>(44 – 84)     | 231<br>(177 – 297)  | 253<br>(162 – 354)    | 268<br>(205 – 342)   | 312<br>(236 – 401)  | 1<br>(1 – 2)     |
| Brunei                   | 0<br>(0 – 0)         | 0<br>(0 – 0)          | 0<br>(0 – 0)         | 0<br>(0 – 0)        | 0<br>(0 – 0)        | 0<br>(0 – 0)          | 0<br>(0 – 0)         | 0<br>(0 – 0)        | 0<br>(0 – 0)     |
| Bulgaria                 | 3<br>(2 – 4)         | 1<br>(1 – 2)          | 1<br>(1 – 2)         | 1<br>(1 – 2)        | 1<br>(1 – 1)        | 1<br>(1 – 2)          | 2<br>(1 – 2)         | 1<br>(0 – 1)        | 0<br>(0 – 0)     |
| Burkina Faso             | 402<br>(256 – 569)   | 555<br>(371 – 773)    | 183<br>(107 – 274)   | 76<br>(38 – 132)    | 140<br>(87 – 201)   | 244<br>(138 – 375)    | 340<br>(215 – 492)   | 232<br>(137 – 346)  | 8<br>(4 – 12)    |
| Burundi                  | 327<br>(191 – 471)   | 204<br>(114 – 312)    | 171<br>(100 – 257)   | 90<br>(55 – 131)    | 166<br>(92 – 246)   | 152<br>(80 – 241)     | 427<br>(280 – 615)   | 135<br>(70 – 211)   | 9<br>(4 – 14)    |
| Cambodia                 | 152<br>(91 – 228)    | 116<br>(68 – 178)     | 84<br>(33 – 145)     | 67<br>(37 – 103)    | 98<br>(59 – 145)    | 110<br>(65 – 163)     | 149<br>(72 – 231)    | 83<br>(46 – 129)    | 0<br>(0 – 1)     |
| Cameroon                 | 841<br>(539 – 1192)  | 830<br>(544 – 1214)   | 361<br>(223 – 529)   | 254<br>(156 – 380)  | 264<br>(151 – 401)  | 747<br>(423 – 1136)   | 858<br>(570 – 1208)  | 535<br>(317 – 791)  | 73<br>(40 – 115) |
| Canada                   | 5<br>(3 – 7)         | 3<br>(2 – 4)          | 4<br>(3 – 5)         | 2<br>(1 – 3)        | 2<br>(2 – 3)        | 5<br>(4 – 7)          | 7<br>(5 – 9)         | 4<br>(3 – 5)        | 0<br>(0 – 0)     |
| Cape Verde               | 1<br>(0 – 1)         | 1<br>(0 – 1)          | 0<br>(0 – 1)         | 0<br>(0 – 0)        | 0<br>(0 – 0)        | 1<br>(0 – 1)          | 1<br>(1 – 1)         | 1<br>(0 – 1)        | 0<br>(0 – 0)     |
| Central African Republic | 247<br>(139 – 373)   | 211<br>(120 – 325)    | 167<br>(95 – 260)    | 83<br>(48 – 129)    | 126<br>(76 – 198)   | 219<br>(124 – 358)    | 260<br>(151 – 381)   | 115<br>(67 – 183)   | 27<br>(14 – 44)  |
| Chad                     | 643<br>(406 – 930)   | 637<br>(386 – 930)    | 274<br>(150 – 421)   | 180<br>(103 – 275)  | 204<br>(120 – 314)  | 560<br>(301 – 913)    | 664<br>(429 – 953)   | 395<br>(233 – 609)  | 30<br>(16 – 48)  |
| Chile                    | 10<br>(7 – 13)       | 4<br>(2 – 5)          | 7<br>(5 – 9)         | 3<br>(2 – 5)        | 7<br>(5 – 9)        | 2<br>(1 – 3)          | 7<br>(5 – 9)         | 7<br>(5 – 9)        | 0<br>(0 – 0)     |
| China                    | 360<br>(290 – 431)   | 655<br>(532 – 797)    | 296<br>(241 – 353)   | 330<br>(264 – 400)  | 268<br>(217 – 326)  | 341<br>(273 – 413)    | 497<br>(405 – 596)   | 479<br>(377 – 577)  | 0<br>(0 – 0)     |
| Colombia                 | 73<br>(49 – 105)     | 68<br>(46 – 97)       | 136<br>(95 – 191)    | 31<br>(17 – 50)     | 45<br>(29 – 65)     | 38<br>(19 – 66)       | 85<br>(56 – 124)     | 99<br>(64 – 142)    | 0<br>(0 – 0)     |
| Comoros                  | 17<br>(8 – 30)       | 11<br>(5 – 21)        | 8<br>(4 – 16)        | 4<br>(2 – 8)        | 8<br>(4 – 14)       | 8<br>(4 – 14)         | 24<br>(12 – 43)      | 6<br>(3 – 12)       | 0<br>(0 – 0)     |
| Congo                    | 85<br>(52 – 132)     | 72<br>(42 – 113)      | 54<br>(31 – 84)      | 28<br>(17 – 45)     | 44<br>(26 – 67)     | 75<br>(40 – 125)      | 91<br>(55 – 136)     | 39<br>(22 – 62)     | 6<br>(3 – 9)     |
| Costa Rica               | 3<br>(2 – 4)         | 2<br>(2 – 3)          | 2<br>(2 – 3)         | 2<br>(1 – 2)        | 2<br>(1 – 2)        | 1<br>(1 – 2)          | 3<br>(2 – 4)         | 3<br>(2 – 4)        | 0<br>(0 – 0)     |
| Croatia                  | 1<br>(1 – 1)         | 1<br>(0 – 1)          | 0<br>(0 – 1)         | 0<br>(0 – 1)        | 0<br>(0 – 0)        | 0<br>(0 – 1)          | 1<br>(0 – 1)         | 0<br>(0 – 1)        | 0<br>(0 – 0)     |
| Cuba                     | 7<br>(5 – 10)        | 5<br>(4 – 7)          | 4<br>(2 – 6)         | 3<br>(2 – 5)        | 4<br>(3 – 6)        | 3<br>(2 – 5)          | 7<br>(5 – 9)         | 10<br>(7 – 13)      | 0<br>(0 – 0)     |

|                                  |                       |                         |                     |                     |                       |                         |                         |                       |                |
|----------------------------------|-----------------------|-------------------------|---------------------|---------------------|-----------------------|-------------------------|-------------------------|-----------------------|----------------|
| Cyprus                           | 0<br>(0-0)            | 0<br>(0-0)              | 0<br>(0-0)          | 0<br>(0-0)          | 0<br>(0-0)            | 0<br>(0-0)              | 0<br>(0-0)              | 0<br>(0-0)            | 0<br>(0-0)     |
| Czech Republic                   | 1<br>(1-2)            | 1<br>(0-1)              | 1<br>(1-1)          | 1<br>(1-1)          | 0<br>(0-1)            | 1<br>(0-1)              | 1<br>(1-2)              | 0<br>(0-1)            | 0<br>(0-0)     |
| Côte d'Ivoire                    | 657<br>(433-938)      | 706<br>(428-1027)       | 282<br>(157-437)    | 197<br>(117-297)    | 217<br>(127-326)      | 597<br>(361-921)        | 716<br>(447-1046)       | 405<br>(241-625)      | 40<br>(20-62)  |
| Democratic Republic of the Congo | 1773<br>(1207-2456)   | 1482<br>(950-2165)      | 1077<br>(694-1571)  | 563<br>(377-780)    | 930<br>(570-1364)     | 1571<br>(987-2368)      | 1858<br>(1218-2641)     | 804<br>(488-1177)     | 47<br>(25-77)  |
| Denmark                          | 1<br>(0-1)            | 0<br>(0-0)              | 0<br>(0-1)          | 0<br>(0-0)          | 0<br>(0-0)            | 0<br>(0-0)              | 1<br>(0-1)              | 0<br>(0-0)            | 0<br>(0-0)     |
| Djibouti                         | 24<br>(14-38)         | 15<br>(9-25)            | 13<br>(7-21)        | 6<br>(4-11)         | 12<br>(7-20)          | 11<br>(5-20)            | 31<br>(18-50)           | 10<br>(5-18)          | 1<br>(0-1)     |
| Dominica                         | 0<br>(0-0)            | 0<br>(0-0)              | 0<br>(0-0)          | 0<br>(0-0)          | 0<br>(0-0)            | 0<br>(0-0)              | 0<br>(0-0)              | 0<br>(0-0)            | 0<br>(0-0)     |
| Dominican Republic               | 12<br>(6-18)          | 11<br>(6-16)            | 21<br>(14-30)       | 7<br>(4-10)         | 7<br>(4-10)           | 7<br>(5-11)             | 13<br>(8-18)            | 13<br>(8-19)          | 0<br>(0-0)     |
| Ecuador                          | 26<br>(16-39)         | 41<br>(26-61)           | 62<br>(40-90)       | 12<br>(7-19)        | 20<br>(13-30)         | 64<br>(40-96)           | 30<br>(19-43)           | 27<br>(17-39)         | 0<br>(0-0)     |
| Egypt                            | 43<br>(30-59)         | 222<br>(160-298)        | 100<br>(75-134)     | 45<br>(26-70)       | 51<br>(37-69)         | 45<br>(20-81)           | 47<br>(32-65)           | 64<br>(30-109)        | 0<br>(0-0)     |
| El Salvador                      | 15<br>(9-21)          | 15<br>(9-21)            | 14<br>(9-22)        | 5<br>(3-8)          | 9<br>(6-14)           | 6<br>(3-10)             | 13<br>(8-20)            | 8<br>(4-13)           | 0<br>(0-0)     |
| Equatorial Guinea                | 16<br>(8-31)          | 15<br>(7-27)            | 10<br>(5-19)        | 5<br>(3-10)         | 9<br>(4-16)           | 17<br>(7-33)            | 18<br>(8-33)            | 7<br>(4-14)           | 2<br>(1-4)     |
| Eritrea                          | 247<br>(146-370)      | 160<br>(83-251)         | 138<br>(79-204)     | 69<br>(41-106)      | 120<br>(70-189)       | 123<br>(65-193)         | 348<br>(207-532)        | 101<br>(54-164)       | 3<br>(2-6)     |
| Estonia                          | 0<br>(0-0)            | 0<br>(0-0)              | 0<br>(0-0)          | 0<br>(0-0)          | 0<br>(0-0)            | 0<br>(0-0)              | 0<br>(0-0)              | 0<br>(0-0)            | 0<br>(0-0)     |
| Ethiopia                         | 2982<br>(1999-4103)   | 1851<br>(1202-2772)     | 1561<br>(1066-2209) | 800<br>(540-1165)   | 1462<br>(978-2132)    | 1420<br>(854-2157)      | 3899<br>(2764-5233)     | 1154<br>(684-1866)    | 73<br>(37-112) |
| Federated States of Micronesia   | 0<br>(0-1)            | 0<br>(0-1)              | 0<br>(0-0)          | 0<br>(0-0)          | 0<br>(0-0)            | 0<br>(0-1)              | 0<br>(0-1)              | 0<br>(0-0)            | 0<br>(0-0)     |
| Fiji                             | 2<br>(1-3)            | 2<br>(1-4)              | 1<br>(1-2)          | 1<br>(1-2)          | 1<br>(1-2)            | 2<br>(1-3)              | 2<br>(1-3)              | 1<br>(1-2)            | 0<br>(0-0)     |
| Finland                          | 0<br>(0-1)            | 0<br>(0-0)              | 0<br>(0-0)          | 0<br>(0-0)          | 0<br>(0-0)            | 0<br>(0-0)              | 0<br>(0-1)              | 0<br>(0-0)            | 0<br>(0-0)     |
| France                           | 9<br>(6-12)           | 10<br>(7-13)            | 7<br>(4-10)         | 5<br>(3-7)          | 4<br>(2-6)            | 8<br>(5-11)             | 16<br>(12-20)           | 12<br>(8-16)          | 0<br>(0-0)     |
| Gabon                            | 24<br>(15-36)         | 20<br>(13-29)           | 15<br>(10-23)       | 8<br>(5-11)         | 13<br>(7-21)          | 24<br>(10-47)           | 28<br>(17-43)           | 11<br>(7-18)          | 1<br>(1-2)     |
| Georgia                          | 2<br>(2-3)            | 2<br>(1-3)              | 2<br>(2-3)          | 2<br>(1-2)          | 2<br>(1-2)            | 2<br>(1-3)              | 3<br>(2-4)              | 3<br>(2-4)            | 0<br>(0-0)     |
| Germany                          | 9<br>(6-12)           | 5<br>(3-7)              | 5<br>(3-6)          | 4<br>(3-5)          | 5<br>(3-7)            | 3<br>(2-5)              | 10<br>(7-13)            | 5<br>(4-7)            | 0<br>(0-0)     |
| Ghana                            | 394<br>(249-577)      | 387<br>(235-608)        | 183<br>(99-283)     | 146<br>(85-235)     | 130<br>(72-210)       | 328<br>(185-521)        | 501<br>(301-709)        | 260<br>(153-383)      | 10<br>(5-16)   |
| Greece                           | 2<br>(1-3)            | 1<br>(1-2)              | 1<br>(1-2)          | 1<br>(1-1)          | 1<br>(1-1)            | 1<br>(0-1)              | 2<br>(1-3)              | 1<br>(1-2)            | 0<br>(0-0)     |
| Grenada                          | 0<br>(0-0)            | 0<br>(0-0)              | 0<br>(0-0)          | 0<br>(0-0)          | 0<br>(0-0)            | 0<br>(0-0)              | 0<br>(0-0)              | 0<br>(0-0)            | 0<br>(0-0)     |
| Guatemala                        | 32<br>(22-45)         | 92<br>(68-121)          | 63<br>(44-84)       | 24<br>(17-34)       | 40<br>(28-55)         | 30<br>(17-47)           | 85<br>(59-114)          | 58<br>(32-82)         | 0<br>(0-0)     |
| Guinea                           | 490<br>(353-660)      | 507<br>(346-710)        | 203<br>(119-294)    | 135<br>(82-202)     | 154<br>(92-235)       | 409<br>(240-596)        | 516<br>(361-703)        | 286<br>(191-413)      | 17<br>(9-26)   |
| Guinea-Bissau                    | 90<br>(59-130)        | 97<br>(58-144)          | 39<br>(23-61)       | 28<br>(16-45)       | 29<br>(17-47)         | 132<br>(78-197)         | 97<br>(60-144)          | 55<br>(29-87)         | 8<br>(4-12)    |
| Guyana                           | 4<br>(2-7)            | 3<br>(2-5)              | 3<br>(2-5)          | 2<br>(1-3)          | 2<br>(1-2)            | 1<br>(1-2)              | 2<br>(1-4)              | 2<br>(1-3)            | 0<br>(0-0)     |
| Haiti                            | 100<br>(50-165)       | 118<br>(63-197)         | 245<br>(159-373)    | 57<br>(27-95)       | 102<br>(63-159)       | 76<br>(35-130)          | 101<br>(53-164)         | 61<br>(25-109)        | 7<br>(3-11)    |
| Honduras                         | 17<br>(7-31)          | 28<br>(12-47)           | 15<br>(5-32)        | 14<br>(6-26)        | 11<br>(5-21)          | 13<br>(5-23)            | 32<br>(14-54)           | 22<br>(9-41)          | 0<br>(0-0)     |
| Hungary                          | 2<br>(1-2)            | 1<br>(1-2)              | 1<br>(1-2)          | 1<br>(0-1)          | 1<br>(0-1)            | 1<br>(1-2)              | 1<br>(1-2)              | 1<br>(0-1)            | 0<br>(0-0)     |
| Iceland                          | 0<br>(0-0)            | 0<br>(0-0)              | 0<br>(0-0)          | 0<br>(0-0)          | 0<br>(0-0)            | 0<br>(0-0)              | 0<br>(0-0)              | 0<br>(0-0)            | 0<br>(0-0)     |
| India                            | 7830<br>(5010-11 425) | 10 542<br>(6631-15 600) | 6043<br>(3551-9061) | 4975<br>(3319-7102) | 7236<br>(4761-10 511) | 13 632<br>(8313-20 815) | 12 607<br>(7398-19 134) | 8766<br>(5863-12 557) | 23<br>(11-38)  |
| Indonesia                        | 1292<br>(831-1860)    | 1370<br>(848-1963)      | 1266<br>(741-1892)  | 727<br>(413-1188)   | 602<br>(338-945)      | 1206<br>(769-1748)      | 1714<br>(999-2487)      | 1148<br>(749-1620)    | 5<br>(3-9)     |
| Iran                             | 22<br>(15-32)         | 40<br>(27-57)           | 20<br>(13-29)       | 15<br>(9-25)        | 14<br>(9-21)          | 19<br>(10-33)           | 15<br>(9-22)            | 51<br>(34-72)         | 0<br>(0-0)     |
| Iraq                             | 72<br>(40-130)        | 154<br>(89-268)         | 69<br>(37-125)      | 64<br>(35-119)      | 100<br>(58-171)       | 72<br>(34-135)          | 110<br>(56-196)         | 53<br>(21-107)        | 0<br>(0-0)     |
| Ireland                          | 1<br>(0-1)            | 0<br>(0-0)              | 0<br>(0-0)          | 0<br>(0-0)          | 0<br>(0-0)            | 0<br>(0-0)              | 0<br>(0-1)              | 0<br>(0-0)            | 0<br>(0-0)     |
| Israel                           | 1<br>(1-2)            | 1<br>(0-1)              | 1<br>(1-1)          | 1<br>(0-1)          | 1<br>(0-1)            | 1<br>(0-1)              | 1<br>(1-2)              | 1<br>(0-1)            | 0<br>(0-0)     |
| Italy                            | 6<br>(4-9)            | 4<br>(2-5)              | 3<br>(2-4)          | 2<br>(1-3)          | 1<br>(1-2)            | 2<br>(1-3)              | 4<br>(3-6)              | 2<br>(1-4)            | 0<br>(0-0)     |
| Jamaica                          | 3<br>(2-5)            | 4<br>(3-7)              | 4<br>(3-7)          | 2<br>(1-3)          | 2<br>(1-3)            | 2<br>(1-3)              | 2<br>(1-4)              | 2<br>(1-4)            | 0<br>(0-0)     |
| Japan                            | 11<br>(8-15)          | 12<br>(9-16)            | 5<br>(3-8)          | 6<br>(4-8)          | 4<br>(3-7)            | 4<br>(2-6)              | 12<br>(9-17)            | 12<br>(8-16)          | 0<br>(0-0)     |
| Jordan                           | 7<br>(4-10)           | 8<br>(5-12)             | 9<br>(6-13)         | 7<br>(4-10)         | 5<br>(3-8)            | 5<br>(2-9)              | 12<br>(8-18)            | 5<br>(3-9)            | 0<br>(0-0)     |

|                  |                       |                       |                       |                       |                      |                       |                       |                       |                    |
|------------------|-----------------------|-----------------------|-----------------------|-----------------------|----------------------|-----------------------|-----------------------|-----------------------|--------------------|
| Kazakhstan       | 12<br>(8 – 17)        | 11<br>(7 – 16)        | 8<br>(4 – 13)         | 9<br>(5 – 14)         | 7<br>(3 – 12)        | 12<br>(7 – 19)        | 16<br>(10 – 23)       | 15<br>(10 – 21)       | 0<br>(0 – 0)       |
| Kenya            | 826<br>(488 – 1319)   | 500<br>(285 – 811)    | 456<br>(258 – 771)    | 229<br>(136 – 371)    | 416<br>(240 – 676)   | 376<br>(185 – 651)    | 1087<br>(674 – 1673)  | 357<br>(189 – 614)    | 105<br>(56 – 174)  |
| Kiribati         | 0<br>(0 – 1)          | 0<br>(0 – 1)          | 0<br>(0 – 0)          | 0<br>(0 – 0)          | 0<br>(0 – 0)         | 0<br>(0 – 1)          | 0<br>(0 – 1)          | 0<br>(0 – 0)          | 0<br>(0 – 0)       |
| Kuwait           | 1<br>(1 – 1)          | 1<br>(1 – 2)          | 1<br>(1 – 1)          | 1<br>(0 – 1)          | 0<br>(0 – 1)         | 1<br>(0 – 1)          | 1<br>(1 – 2)          | 1<br>(0 – 1)          | 0<br>(0 – 0)       |
| Kyrgyzstan       | 6<br>(4 – 9)          | 10<br>(7 – 14)        | 10<br>(7 – 13)        | 5<br>(3 – 8)          | 7<br>(5 – 10)        | 8<br>(5 – 13)         | 9<br>(6 – 12)         | 13<br>(9 – 17)        | 0<br>(0 – 0)       |
| Laos             | 95<br>(44 – 179)      | 82<br>(40 – 146)      | 57<br>(21 – 106)      | 42<br>(18 – 75)       | 50<br>(26 – 90)      | 70<br>(33 – 127)      | 94<br>(44 – 163)      | 52<br>(22 – 100)      | 0<br>(0 – 0)       |
| Latvia           | 0<br>(0 – 1)          | 0<br>(0 – 0)          | 0<br>(0 – 0)          | 0<br>(0 – 0)          | 0<br>(0 – 0)         | 0<br>(0 – 0)          | 0<br>(0 – 0)          | 0<br>(0 – 0)          | 0<br>(0 – 0)       |
| Lebanon          | 2<br>(1 – 2)          | 2<br>(1 – 4)          | 2<br>(1 – 3)          | 1<br>(1 – 2)          | 1<br>(1 – 2)         | 1<br>(1 – 2)          | 2<br>(1 – 3)          | 1<br>(0 – 2)          | 0<br>(0 – 0)       |
| Lesotho          | 50<br>(28 – 81)       | 34<br>(18 – 55)       | 39<br>(20 – 63)       | 16<br>(8 – 28)        | 33<br>(18 – 55)      | 36<br>(18 – 65)       | 29<br>(15 – 49)       | 31<br>(17 – 52)       | 27<br>(15 – 41)    |
| Liberia          | 180<br>(121 – 250)    | 185<br>(125 – 260)    | 75<br>(48 – 109)      | 46<br>(27 – 71)       | 53<br>(29 – 87)      | 151<br>(95 – 223)     | 183<br>(124 – 253)    | 97<br>(57 – 141)      | 3<br>(1 – 5)       |
| Libya            | 5<br>(3 – 9)          | 6<br>(4 – 10)         | 3<br>(3 – 7)          | 3<br>(2 – 5)          | 3<br>(2 – 5)         | 3<br>(1 – 6)          | 5<br>(2 – 9)          | 3<br>(1 – 6)          | 0<br>(0 – 0)       |
| Lithuania        | 0<br>(0 – 1)          | 0<br>(0 – 0)          | 0<br>(0 – 0)          | 0<br>(0 – 0)          | 0<br>(0 – 0)         | 0<br>(0 – 0)          | 0<br>(0 – 1)          | 0<br>(0 – 0)          | 0<br>(0 – 0)       |
| Luxembourg       | 0<br>(0 – 0)          | 0<br>(0 – 0)          | 0<br>(0 – 0)          | 0<br>(0 – 0)          | 0<br>(0 – 0)         | 0<br>(0 – 0)          | 0<br>(0 – 0)          | 0<br>(0 – 0)          | 0<br>(0 – 0)       |
| Macedonia        | 0<br>(0 – 1)          | 0<br>(0 – 0)          | 0<br>(0 – 0)          | 0<br>(0 – 0)          | 0<br>(0 – 0)         | 0<br>(0 – 0)          | 0<br>(0 – 1)          | 0<br>(0 – 0)          | 0<br>(0 – 0)       |
| Madagascar       | 476<br>(254 – 770)    | 284<br>(143 – 451)    | 246<br>(137 – 397)    | 127<br>(70 – 206)     | 244<br>(134 – 398)   | 223<br>(111 – 376)    | 664<br>(388 – 1011)   | 182<br>(86 – 308)     | 3<br>(1 – 5)       |
| Malawi           | 416<br>(244 – 616)    | 265<br>(158 – 411)    | 224<br>(138 – 340)    | 115<br>(68 – 175)     | 207<br>(120 – 318)   | 200<br>(110 – 341)    | 566<br>(357 – 830)    | 175<br>(81 – 306)     | 88<br>(49 – 134)   |
| Malaysia         | 39<br>(27 – 53)       | 39<br>(27 – 54)       | 22<br>(14 – 35)       | 18<br>(8 – 27)        | 49<br>(36 – 66)      | 32<br>(19 – 46)       | 61<br>(43 – 85)       | 32<br>(21 – 47)       | 0<br>(0 – 0)       |
| Maldives         | 1<br>(0 – 1)          | 1<br>(0 – 1)          | 0<br>(0 – 1)          | 0<br>(0 – 0)          | 0<br>(0 – 1)         | 0<br>(0 – 1)          | 1<br>(0 – 1)          | 0<br>(0 – 1)          | 0<br>(0 – 0)       |
| Mali             | 521<br>(359 – 705)    | 537<br>(382 – 747)    | 223<br>(139 – 314)    | 151<br>(97 – 224)     | 161<br>(89 – 239)    | 487<br>(314 – 685)    | 562<br>(386 – 788)    | 308<br>(203 – 439)    | 10<br>(5 – 15)     |
| Malta            | 0<br>(0 – 0)          | 0<br>(0 – 0)          | 0<br>(0 – 0)          | 0<br>(0 – 0)          | 0<br>(0 – 0)         | 0<br>(0 – 0)          | 0<br>(0 – 0)          | 0<br>(0 – 0)          | 0<br>(0 – 0)       |
| Marshall Islands | 0<br>(0 – 0)          | 0<br>(0 – 1)          | 0<br>(0 – 0)          | 0<br>(0 – 0)          | 0<br>(0 – 0)         | 0<br>(0 – 0)          | 0<br>(0 – 0)          | 0<br>(0 – 0)          | 0<br>(0 – 0)       |
| Mauritania       | 134<br>(79 – 203)     | 145<br>(81 – 219)     | 55<br>(30 – 83)       | 38<br>(19 – 61)       | 44<br>(24 – 68)      | 120<br>(62 – 179)     | 151<br>(87 – 225)     | 73<br>(43 – 108)      | 1<br>(0 – 1)       |
| Mauritius        | 1<br>(1 – 2)          | 1<br>(0 – 1)          | 1<br>(0 – 1)          | 0<br>(0 – 1)          | 1<br>(1 – 1)         | 1<br>(0 – 1)          | 1<br>(1 – 2)          | 1<br>(1 – 1)          | 0<br>(0 – 0)       |
| Mexico           | 138<br>(127 – 151)    | 215<br>(198 – 234)    | 236<br>(216 – 259)    | 92<br>(84 – 101)      | 82<br>(74 – 91)      | 91<br>(82 – 101)      | 174<br>(159 – 192)    | 193<br>(177 – 211)    | 0<br>(0 – 0)       |
| Moldova          | 2<br>(1 – 2)          | 1<br>(1 – 1)          | 1<br>(0 – 2)          | 1<br>(1 – 1)          | 1<br>(1 – 2)         | 1<br>(0 – 1)          | 1<br>(1 – 2)          | 1<br>(1 – 2)          | 0<br>(0 – 0)       |
| Mongolia         | 5<br>(3 – 7)          | 5<br>(3 – 8)          | 3<br>(2 – 5)          | 3<br>(2 – 5)          | 4<br>(2 – 6)         | 4<br>(2 – 6)          | 5<br>(3 – 8)          | 3<br>(1 – 6)          | 0<br>(0 – 0)       |
| Montenegro       | 0<br>(0 – 0)          | 0<br>(0 – 0)          | 0<br>(0 – 0)          | 0<br>(0 – 0)          | 0<br>(0 – 0)         | 0<br>(0 – 0)          | 0<br>(0 – 0)          | 0<br>(0 – 0)          | 0<br>(0 – 0)       |
| Morocco          | 76<br>(51 – 108)      | 78<br>(52 – 110)      | 84<br>(56 – 118)      | 49<br>(33 – 68)       | 30<br>(16 – 46)      | 43<br>(22 – 66)       | 70<br>(47 – 102)      | 42<br>(24 – 66)       | 0<br>(0 – 0)       |
| Mozambique       | 410<br>(228 – 645)    | 286<br>(160 – 439)    | 276<br>(150 – 439)    | 120<br>(68 – 190)     | 300<br>(169 – 477)   | 219<br>(118 – 358)    | 587<br>(341 – 875)    | 280<br>(156 – 449)    | 92<br>(49 – 146)   |
| Myanmar          | 567<br>(257 – 1119)   | 507<br>(237 – 989)    | 368<br>(145 – 757)    | 276<br>(123 – 553)    | 342<br>(141 – 694)   | 442<br>(183 – 865)    | 619<br>(285 – 1194)   | 401<br>(182 – 823)    | 2<br>(1 – 4)       |
| Namibia          | 16<br>(9 – 26)        | 10<br>(5 – 17)        | 12<br>(6 – 20)        | 5<br>(3 – 9)          | 10<br>(6 – 17)       | 11<br>(5 – 20)        | 9<br>(5 – 16)         | 10<br>(6 – 18)        | 4<br>(2 – 7)       |
| Nepal            | 197<br>(116 – 291)    | 222<br>(140 – 333)    | 182<br>(114 – 266)    | 77<br>(49 – 113)      | 83<br>(47 – 131)     | 263<br>(153 – 395)    | 364<br>(241 – 512)    | 196<br>(121 – 286)    | 0<br>(0 – 1)       |
| Netherlands      | 2<br>(1 – 3)          | 1<br>(1 – 2)          | 3<br>(2 – 3)          | 1<br>(1 – 1)          | 1<br>(1 – 2)         | 1<br>(0 – 1)          | 2<br>(2 – 3)          | 1<br>(1 – 2)          | 0<br>(0 – 0)       |
| New Zealand      | 1<br>(0 – 1)          | 1<br>(0 – 1)          | 1<br>(1 – 1)          | 1<br>(0 – 1)          | 0<br>(0 – 1)         | 0<br>(0 – 1)          | 1<br>(1 – 2)          | 1<br>(1 – 1)          | 0<br>(0 – 0)       |
| Nicaragua        | 9<br>(5 – 13)         | 21<br>(16 – 28)       | 14<br>(10 – 19)       | 6<br>(4 – 9)          | 9<br>(6 – 12)        | 6<br>(3 – 10)         | 9<br>(6 – 12)         | 15<br>(11 – 21)       | 0<br>(0 – 0)       |
| Niger            | 688<br>(480 – 942)    | 699<br>(483 – 935)    | 310<br>(201 – 438)    | 190<br>(113 – 274)    | 219<br>(135 – 312)   | 597<br>(338 – 911)    | 760<br>(533 – 998)    | 399<br>(267 – 572)    | 4<br>(2 – 6)       |
| Nigeria          | 6406<br>(4055 – 9215) | 5661<br>(3290 – 8567) | 2691<br>(1592 – 4201) | 2807<br>(1675 – 4087) | 1821<br>(925 – 2976) | 5876<br>(2948 – 9181) | 6844<br>(4297 – 9869) | 4067<br>(2338 – 6412) | 450<br>(223 – 735) |
| North Korea      | 31<br>(16 – 52)       | 51<br>(25 – 85)       | 25<br>(12 – 45)       | 32<br>(15 – 53)       | 26<br>(13 – 43)      | 32<br>(17 – 59)       | 43<br>(23 – 68)       | 35<br>(17 – 59)       | 0<br>(0 – 0)       |
| Norway           | 1<br>(0 – 1)          | 0<br>(0 – 0)          | 0<br>(0 – 1)          | 0<br>(0 – 0)          | 0<br>(0 – 0)         | 0<br>(0 – 0)          | 1<br>(0 – 1)          | 0<br>(0 – 0)          | 0<br>(0 – 0)       |
| Oman             | 1<br>(1 – 2)          | 2<br>(1 – 3)          | 1<br>(1 – 2)          | 1<br>(1 – 2)          | 1<br>(0 – 1)         | 1<br>(0 – 2)          | 1<br>(1 – 2)          | 1<br>(0 – 2)          | 0<br>(0 – 0)       |
| Pakistan         | 2187<br>(1182 – 3304) | 2365<br>(1272 – 3723) | 2117<br>(1143 – 3164) | 915<br>(491 – 1362)   | 972<br>(497 – 1502)  | 3089<br>(1301 – 4895) | 4042<br>(2082 – 6362) | 2154<br>(1154 – 3209) | 2<br>(1 – 4)       |
| Palestine        | 2<br>(1 – 3)          | 2<br>(1 – 4)          | 2<br>(1 – 3)          | 1<br>(1 – 2)          | 1<br>(1 – 2)         | 1<br>(1 – 2)          | 2<br>(1 – 3)          | 1<br>(1 – 2)          | 0<br>(0 – 0)       |
| Panama           | 6<br>(4 – 9)          | 6<br>(4 – 9)          | 7<br>(5 – 10)         | 3<br>(2 – 5)          | 4<br>(3 – 6)         | 3<br>(2 – 5)          | 6<br>(4 – 9)          | 6<br>(4 – 9)          | 0<br>(0 – 0)       |



|                                  |                       |                     |                     |                    |                    |                     |                       |                    |                   |
|----------------------------------|-----------------------|---------------------|---------------------|--------------------|--------------------|---------------------|-----------------------|--------------------|-------------------|
| Papua New Guinea                 | 201<br>(101 – 347)    | 232<br>(115 – 419)  | 130<br>(63 – 241)   | 111<br>(55 – 196)  | 97<br>(49 – 177)   | 172<br>(85 – 324)   | 202<br>(103 – 365)    | 110<br>(54 – 197)  | 2<br>(1 – 3)      |
| Paraguay                         | 31<br>(23 – 43)       | 27<br>(19 – 38)     | 22<br>(16 – 29)     | 7<br>(5 – 10)      | 18<br>(12 – 25)    | 19<br>(12 – 28)     | 11<br>(8 – 17)        | 20<br>(14 – 28)    | 0<br>(0 – 0)      |
| Peru                             | 41<br>(27 – 58)       | 57<br>(38 – 78)     | 51<br>(35 – 70)     | 17<br>(11 – 27)    | 58<br>(39 – 80)    | 88<br>(57 – 124)    | 44<br>(30 – 60)       | 26<br>(16 – 38)    | 0<br>(0 – 0)      |
| Philippines                      | 208<br>(138 – 302)    | 365<br>(238 – 533)  | 479<br>(312 – 698)  | 92<br>(51 – 154)   | 128<br>(82 – 193)  | 337<br>(138 – 351)  | 479<br>(219 – 497)    | 114<br>(72 – 168)  | 1<br>(0 – 1)      |
| Poland                           | 4<br>(3 – 5)          | 3<br>(2 – 5)        | 2<br>(1 – 3)        | 2<br>(1 – 3)       | 2<br>(1 – 3)       | 2<br>(1 – 4)        | 3<br>(2 – 4)          | 1<br>(1 – 2)       | 0<br>(0 – 0)      |
| Portugal                         | 2<br>(2 – 3)          | 1<br>(1 – 1)        | 1<br>(1 – 2)        | 1<br>(0 – 1)       | 1<br>(1 – 2)       | 0<br>(0 – 1)        | 1<br>(1 – 2)          | 1<br>(0 – 1)       | 0<br>(0 – 0)      |
| Qatar                            | 1<br>(0 – 1)          | 1<br>(0 – 1)        | 1<br>(0 – 1)        | 0<br>(0 – 1)       | 0<br>(0 – 1)       | 0<br>(0 – 1)        | 1<br>(0 – 1)          | 0<br>(0 – 1)       | 0<br>(0 – 0)      |
| Romania                          | 8<br>(6 – 11)         | 5<br>(3 – 6)        | 3<br>(2 – 4)        | 3<br>(2 – 5)       | 3<br>(2 – 4)       | 3<br>(2 – 4)        | 5<br>(4 – 7)          | 7<br>(5 – 9)       | 0<br>(0 – 0)      |
| Russia                           | 45<br>(35 – 57)       | 35<br>(26 – 44)     | 22<br>(16 – 28)     | 31<br>(21 – 44)    | 16<br>(11 – 22)    | 26<br>(16 – 38)     | 68<br>(52 – 85)       | 49<br>(38 – 62)    | 0<br>(0 – 0)      |
| Rwanda                           | 223<br>(138 – 325)    | 144<br>(85 – 216)   | 121<br>(66 – 191)   | 61<br>(35 – 92)    | 116<br>(72 – 169)  | 108<br>(55 – 168)   | 303<br>(188 – 443)    | 90<br>(46 – 155)   | 16<br>(8 – 25)    |
| Saint Lucia                      | 0<br>(0 – 0)          | 0<br>(0 – 0)        | 0<br>(0 – 0)        | 0<br>(0 – 0)       | 0<br>(0 – 0)       | 0<br>(0 – 0)        | 0<br>(0 – 0)          | 0<br>(0 – 0)       | 0<br>(0 – 0)      |
| Saint Vincent and the Grenadines | 0<br>(0 – 0)          | 0<br>(0 – 0)        | 0<br>(0 – 0)        | 0<br>(0 – 0)       | 0<br>(0 – 0)       | 0<br>(0 – 0)        | 0<br>(0 – 0)          | 0<br>(0 – 0)       | 0<br>(0 – 0)      |
| Samoa                            | 0<br>(0 – 1)          | 0<br>(0 – 1)        | 0<br>(0 – 0)        | 0<br>(0 – 0)       | 0<br>(0 – 0)       | 0<br>(0 – 0)        | 0<br>(0 – 0)          | 0<br>(0 – 0)       | 0<br>(0 – 0)      |
| Saudi Arabia                     | 5<br>(4 – 7)          | 5<br>(3 – 7)        | 4<br>(3 – 6)        | 3<br>(2 – 4)       | 3<br>(2 – 5)       | 4<br>(2 – 7)        | 10<br>(7 – 14)        | 3<br>(2 – 5)       | 0<br>(0 – 0)      |
| Senegal                          | 335<br>(232 – 463)    | 346<br>(220 – 523)  | 141<br>(90 – 210)   | 93<br>(54 – 138)   | 103<br>(59 – 163)  | 301<br>(175 – 455)  | 358<br>(238 – 499)    | 198<br>(120 – 282) | 4<br>(2 – 6)      |
| Serbia                           | 2<br>(1 – 3)          | 1<br>(1 – 2)        | 1<br>(1 – 2)        | 1<br>(1 – 2)       | 1<br>(1 – 1)       | 1<br>(1 – 2)        | 2<br>(1 – 2)          | 1<br>(0 – 1)       | 0<br>(0 – 0)      |
| Seychelles                       | 0<br>(0 – 0)          | 0<br>(0 – 0)        | 0<br>(0 – 0)        | 0<br>(0 – 0)       | 0<br>(0 – 0)       | 0<br>(0 – 0)        | 0<br>(0 – 0)          | 0<br>(0 – 0)       | 0<br>(0 – 0)      |
| Sierra Leone                     | 253<br>(170 – 347)    | 256<br>(158 – 361)  | 107<br>(64 – 162)   | 70<br>(38 – 106)   | 81<br>(51 – 119)   | 213<br>(121 – 315)  | 266<br>(179 – 371)    | 144<br>(85 – 209)  | 8<br>(4 – 13)     |
| Singapore                        | 0<br>(0 – 1)          | 0<br>(0 – 1)        | 0<br>(0 – 0)        | 0<br>(0 – 0)       | 0<br>(0 – 0)       | 0<br>(0 – 0)        | 0<br>(0 – 1)          | 0<br>(0 – 0)       | 0<br>(0 – 0)      |
| Slovakia                         | 1<br>(1 – 1)          | 0<br>(0 – 1)        | 0<br>(0 – 1)        | 0<br>(0 – 1)       | 0<br>(0 – 0)       | 0<br>(0 – 1)        | 1<br>(0 – 1)          | 0<br>(0 – 1)       | 0<br>(0 – 0)      |
| Slovenia                         | 0<br>(0 – 0)          | 0<br>(0 – 0)        | 0<br>(0 – 0)        | 0<br>(0 – 0)       | 0<br>(0 – 0)       | 0<br>(0 – 0)        | 0<br>(0 – 0)          | 0<br>(0 – 0)       | 0<br>(0 – 0)      |
| Solomon Islands                  | 5<br>(3 – 10)         | 6<br>(3 – 11)       | 3<br>(1 – 6)        | 3<br>(1 – 5)       | 2<br>(1 – 5)       | 4<br>(2 – 8)        | 5<br>(2 – 9)          | 3<br>(1 – 5)       | 0<br>(0 – 0)      |
| Somalia                          | 372<br>(212 – 609)    | 236<br>(129 – 430)  | 192<br>(109 – 323)  | 97<br>(55 – 172)   | 183<br>(106 – 301) | 170<br>(90 – 298)   | 503<br>(284 – 895)    | 141<br>(75 – 254)  | 4<br>(2 – 7)      |
| South Africa                     | 178<br>(100 – 290)    | 158<br>(86 – 251)   | 290<br>(157 – 473)  | 111<br>(55 – 190)  | 156<br>(85 – 254)  | 263<br>(134 – 473)  | 220<br>(117 – 363)    | 351<br>(187 – 570) | 195<br>(90 – 333) |
| South Korea                      | 5<br>(3 – 7)          | 9<br>(6 – 13)       | 7<br>(4 – 10)       | 4<br>(2 – 6)       | 8<br>(5 – 12)      | 3<br>(2 – 5)        | 14<br>(9 – 20)        | 9<br>(6 – 13)      | 0<br>(0 – 0)      |
| South Sudan                      | 758<br>(505 – 1097)   | 468<br>(300 – 657)  | 382<br>(234 – 562)  | 197<br>(129 – 290) | 374<br>(237 – 536) | 358<br>(212 – 544)  | 1041<br>(704 – 1421)  | 290<br>(167 – 451) | 34<br>(17 – 55)   |
| Spain                            | 7<br>(5 – 9)          | 4<br>(3 – 6)        | 3<br>(2 – 5)        | 3<br>(2 – 4)       | 3<br>(1 – 5)       | 2<br>(1 – 3)        | 6<br>(4 – 8)          | 2<br>(1 – 4)       | 0<br>(0 – 0)      |
| Sri Lanka                        | 21<br>(12 – 32)       | 20<br>(12 – 31)     | 11<br>(6 – 18)      | 9<br>(5 – 15)      | 12<br>(7 – 18)     | 13<br>(7 – 21)      | 22<br>(14 – 33)       | 8<br>(4 – 14)      | 0<br>(0 – 0)      |
| Sudan                            | 470<br>(279 – 727)    | 671<br>(396 – 1035) | 506<br>(308 – 771)  | 328<br>(193 – 506) | 313<br>(164 – 516) | 351<br>(152 – 614)  | 523<br>(304 – 811)    | 356<br>(170 – 599) | 2<br>(1 – 4)      |
| Suriname                         | 1<br>(1 – 2)          | 1<br>(1 – 2)        | 1<br>(1 – 2)        | 0<br>(0 – 1)       | 1<br>(0 – 1)       | 1<br>(0 – 1)        | 1<br>(0 – 1)          | 1<br>(0 – 1)       | 0<br>(0 – 0)      |
| Swaziland                        | 9<br>(5 – 14)         | 6<br>(4 – 10)       | 7<br>(4 – 12)       | 3<br>(2 – 5)       | 6<br>(3 – 10)      | 6<br>(3 – 11)       | 6<br>(3 – 9)          | 6<br>(3 – 10)      | 6<br>(4 – 9)      |
| Sweden                           | 1<br>(1 – 1)          | 0<br>(0 – 1)        | 1<br>(0 – 1)        | 0<br>(0 – 1)       | 0<br>(0 – 1)       | 0<br>(0 – 1)        | 1<br>(1 – 1)          | 0<br>(0 – 1)       | 0<br>(0 – 0)      |
| Switzerland                      | 1<br>(0 – 1)          | 0<br>(0 – 1)        | 0<br>(0 – 1)        | 0<br>(0 – 0)       | 0<br>(0 – 1)       | 0<br>(0 – 0)        | 1<br>(0 – 1)          | 0<br>(0 – 1)       | 0<br>(0 – 0)      |
| Syria                            | 30<br>(17 – 48)       | 43<br>(26 – 64)     | 35<br>(21 – 52)     | 22<br>(14 – 34)    | 21<br>(12 – 34)    | 23<br>(13 – 36)     | 35<br>(21 – 53)       | 21<br>(11 – 37)    | 0<br>(0 – 0)      |
| São Tomé and Príncipe            | 2<br>(1 – 3)          | 2<br>(1 – 3)        | 1<br>(0 – 1)        | 0<br>(0 – 1)       | 1<br>(0 – 1)       | 1<br>(1 – 2)        | 2<br>(1 – 3)          | 1<br>(0 – 2)       | 0<br>(0 – 0)      |
| Taiwan<br>(Province of China)    | 4<br>(3 – 6)          | 3<br>(2 – 4)        | 2<br>(1 – 3)        | 3<br>(2 – 4)       | 3<br>(2 – 5)       | 3<br>(1 – 4)        | 5<br>(3 – 7)          | 3<br>(2 – 5)       | 0<br>(0 – 0)      |
| Tajikistan                       | 7<br>(4 – 11)         | 12<br>(8 – 17)      | 8<br>(5 – 12)       | 9<br>(5 – 13)      | 9<br>(5 – 14)      | 13<br>(8 – 18)      | 15<br>(9 – 23)        | 10<br>(6 – 16)     | 0<br>(0 – 0)      |
| Tanzania                         | 1697<br>(1080 – 2567) | 995<br>(638 – 1448) | 743<br>(423 – 1173) | 414<br>(251 – 630) | 598<br>(320 – 987) | 677<br>(387 – 1092) | 1990<br>(1283 – 2867) | 474<br>(240 – 790) | 141<br>(77 – 225) |
| Thailand                         | 121<br>(73 – 183)     | 57<br>(32 – 91)     | 41<br>(20 – 77)     | 50<br>(30 – 77)    | 71<br>(44 – 108)   | 56<br>(31 – 97)     | 50<br>(25 – 83)       | 34<br>(18 – 60)    | 1<br>(0 – 1)      |
| The Bahamas                      | 1<br>(0 – 1)          | 1<br>(0 – 1)        | 1<br>(0 – 1)        | 0<br>(0 – 1)       | 0<br>(0 – 1)       | 0<br>(0 – 0)        | 0<br>(0 – 1)          | 0<br>(0 – 1)       | 0<br>(0 – 0)      |
| The Gambia                       | 38<br>(20 – 64)       | 39<br>(18 – 65)     | 16<br>(8 – 29)      | 11<br>(5 – 19)     | 12<br>(6 – 22)     | 35<br>(16 – 64)     | 40<br>(19 – 70)       | 23<br>(11 – 40)    | 1<br>(0 – 2)      |
| Timor-Leste                      | 16<br>(10 – 23)       | 12<br>(8 – 17)      | 9<br>(4 – 14)       | 7<br>(4 – 10)      | 10<br>(7 – 15)     | 12<br>(7 – 16)      | 14<br>(9 – 20)        | 9<br>(5 – 13)      | 0<br>(0 – 0)      |
| Togo                             | 139<br>(81 – 219)     | 160<br>(93 – 247)   | 63<br>(36 – 98)     | 42<br>(22 – 66)    | 46<br>(25 – 77)    | 119<br>(62 – 195)   | 153<br>(92 – 238)     | 87<br>(48 – 149)   | 8<br>(4 – 13)     |

|                      |                    |                  |                  |                  |                  |                  |                    |                  |                 |
|----------------------|--------------------|------------------|------------------|------------------|------------------|------------------|--------------------|------------------|-----------------|
| Tonga                | 0<br>(0-1)         | 1<br>(0-1)       | 0<br>(0-0)       | 0<br>(0-0)       | 0<br>(0-0)       | 0<br>(0-1)       | 0<br>(0-1)         | 0<br>(0-0)       | 0<br>(0-0)      |
| Trinidad and Tobago  | 2<br>(1-3)         | 2<br>(1-3)       | 2<br>(1-3)       | 1<br>(0-1)       | 1<br>(0-1)       | 1<br>(0-1)       | 1<br>(1-2)         | 1<br>(0-1)       | 0<br>(0-0)      |
| Tunisia              | 5<br>(3-8)         | 7<br>(3-11)      | 5<br>(3-8)       | 4<br>(2-6)       | 3<br>(2-5)       | 3<br>(2-6)       | 5<br>(3-9)         | 3<br>(1-6)       | 0<br>(0-0)      |
| Turkey               | 38<br>(26-51)      | 24<br>(16-35)    | 29<br>(19-40)    | 13<br>(7-20)     | 28<br>(19-38)    | 13<br>(7-21)     | 28<br>(18-39)      | 16<br>(10-25)    | 0<br>(0-0)      |
| Turkmenistan         | 4<br>(2-7)         | 6<br>(3-9)       | 4<br>(2-7)       | 4<br>(2-7)       | 5<br>(2-8)       | 6<br>(3-10)      | 8<br>(4-12)        | 5<br>(3-9)       | 0<br>(0-0)      |
| Uganda               | 1000<br>(620-1484) | 615<br>(356-921) | 553<br>(327-839) | 284<br>(170-421) | 513<br>(299-779) | 487<br>(272-759) | 1353<br>(868-1971) | 421<br>(226-680) | 149<br>(79-230) |
| Ukraine              | 16<br>(11-21)      | 12<br>(8-17)     | 10<br>(5-16)     | 13<br>(8-19)     | 8<br>(4-12)      | 10<br>(5-16)     | 21<br>(14-28)      | 27<br>(18-36)    | 0<br>(0-0)      |
| United Arab Emirates | 2<br>(1-4)         | 4<br>(2-6)       | 2<br>(1-4)       | 2<br>(1-3)       | 1<br>(1-2)       | 2<br>(1-4)       | 3<br>(1-5)         | 1<br>(0-3)       | 0<br>(0-0)      |
| United Kingdom       | 9<br>(8-11)        | 5<br>(4-6)       | 6<br>(5-7)       | 4<br>(3-4)       | 4<br>(4-5)       | 3<br>(3-4)       | 10<br>(8-12)       | 5<br>(4-6)       | 0<br>(0-0)      |
| United States        | 92<br>(71-117)     | 41<br>(30-54)    | 60<br>(44-79)    | 48<br>(29-75)    | 60<br>(47-76)    | 137<br>(108-173) | 217<br>(169-271)   | 139<br>(109-174) | 0<br>(0-0)      |
| Uruguay              | 3<br>(2-4)         | 1<br>(1-2)       | 1<br>(1-2)       | 1<br>(0-1)       | 2<br>(1-3)       | 1<br>(0-1)       | 1<br>(1-2)         | 1<br>(1-2)       | 0<br>(0-0)      |
| Uzbekistan           | 16<br>(9-27)       | 30<br>(19-44)    | 15<br>(8-24)     | 16<br>(9-26)     | 24<br>(14-37)    | 30<br>(19-44)    | 44<br>(27-66)      | 12<br>(6-21)     | 0<br>(0-0)      |
| Vanuatu              | 1<br>(1-3)         | 2<br>(1-3)       | 1<br>(0-2)       | 1<br>(0-2)       | 1<br>(0-1)       | 1<br>(1-2)       | 1<br>(1-3)         | 1<br>(0-2)       | 0<br>(0-0)      |
| Venezuela            | 39<br>(27-53)      | 32<br>(22-44)    | 74<br>(55-96)    | 18<br>(12-25)    | 25<br>(18-34)    | 27<br>(14-41)    | 40<br>(29-51)      | 81<br>(60-105)   | 0<br>(0-0)      |
| Vietnam              | 128<br>(65-225)    | 89<br>(46-149)   | 51<br>(16-99)    | 57<br>(28-103)   | 98<br>(55-170)   | 99<br>(54-164)   | 156<br>(83-262)    | 120<br>(61-204)  | 0<br>(0-0)      |
| Yemen                | 294<br>(146-545)   | 463<br>(225-894) | 336<br>(177-615) | 215<br>(105-402) | 198<br>(97-371)  | 208<br>(71-440)  | 368<br>(171-721)   | 193<br>(80-373)  | 0<br>(0-1)      |
| Zambia               | 364<br>(221-552)   | 240<br>(135-376) | 202<br>(110-325) | 103<br>(61-164)  | 187<br>(107-295) | 169<br>(84-279)  | 489<br>(303-758)   | 158<br>(85-264)  | 126<br>(74-190) |
| Zimbabwe             | 429<br>(241-695)   | 285<br>(163-449) | 243<br>(125-395) | 149<br>(84-251)  | 400<br>(232-650) | 261<br>(110-488) | 175<br>(90-295)    | 231<br>(123-390) | 127<br>(66-204) |

Appendix Figure 2: Maternal mortality ratio (MMR) data, CODEm results, HIV-correction and post-CoDCorrect model results by year for 188 countries, 1990 - 2013

# Afghanistan

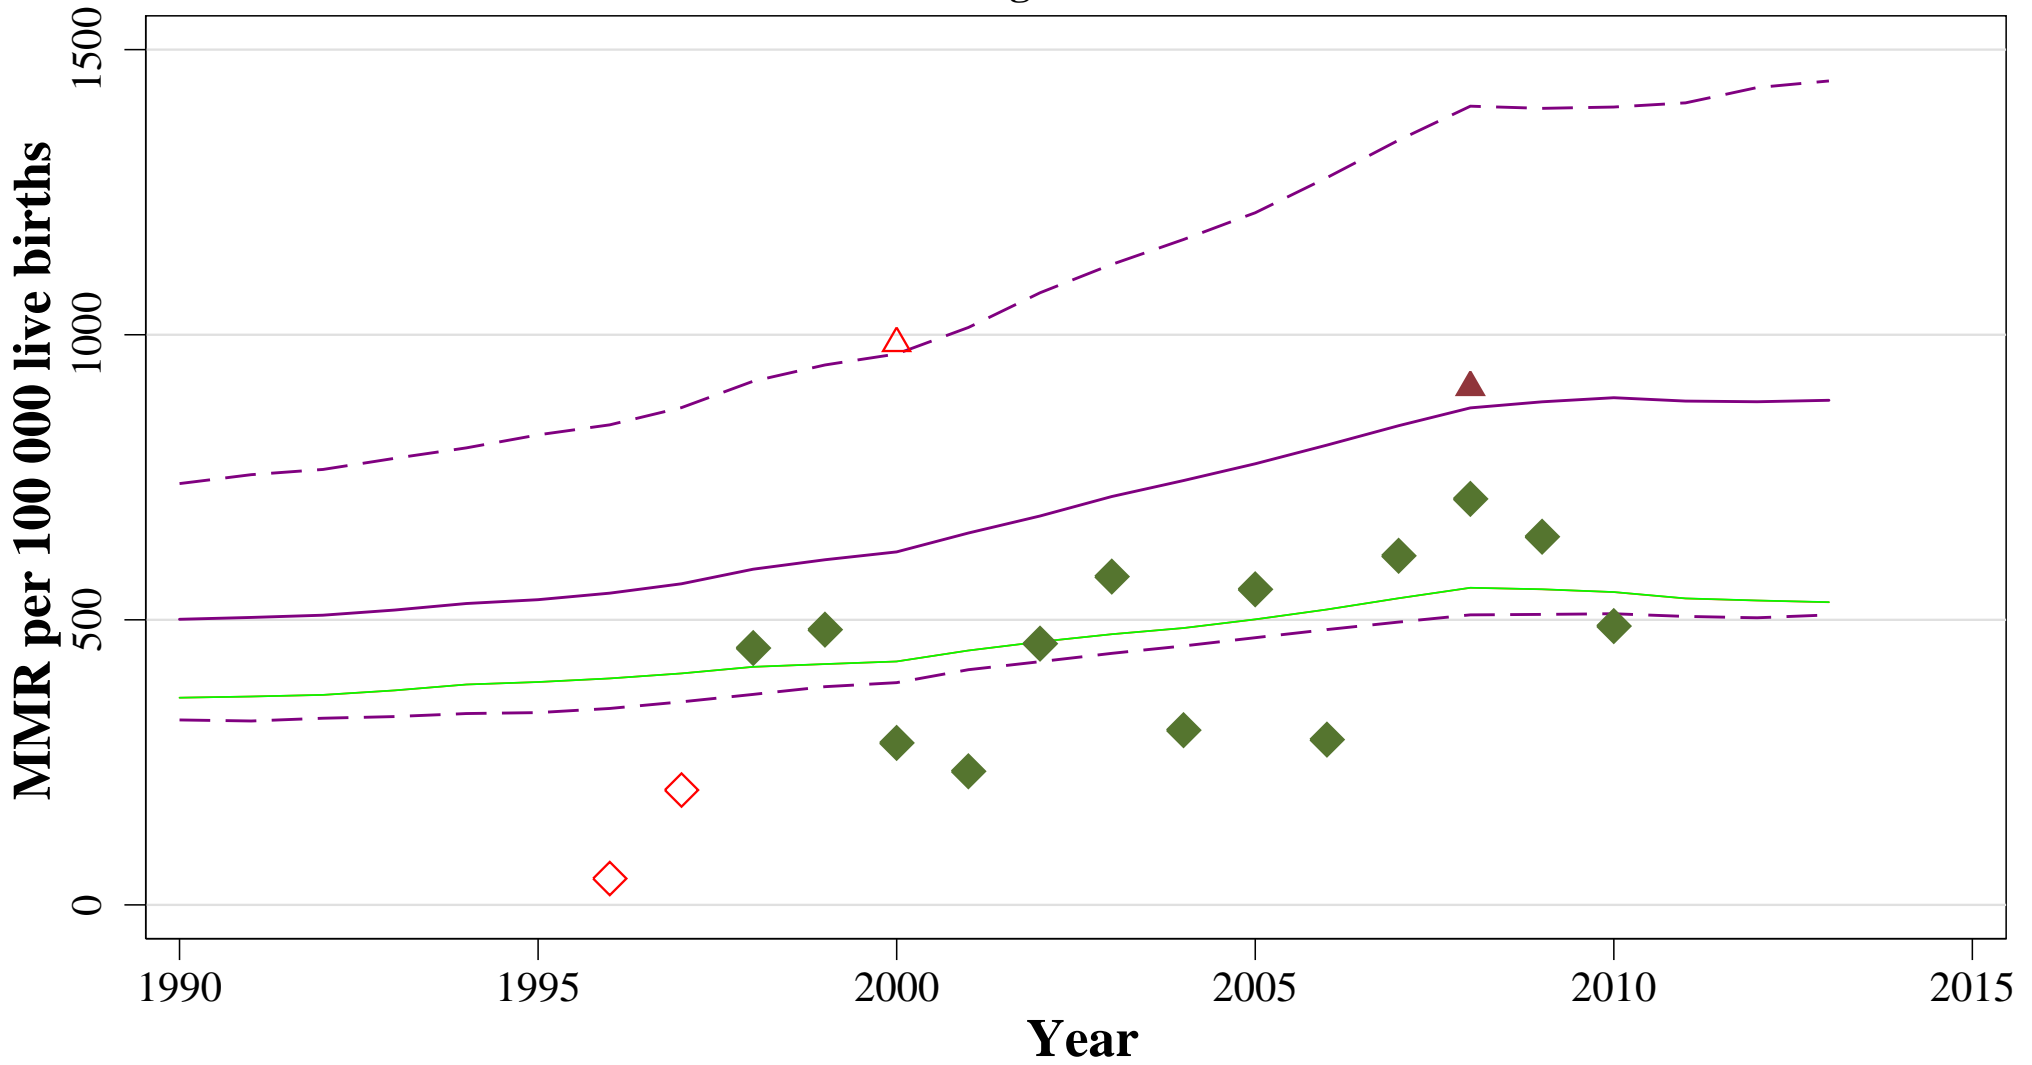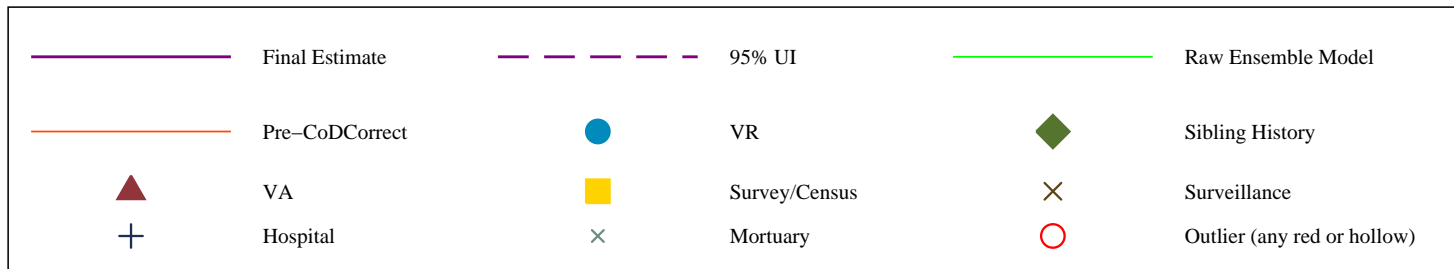

# Albania

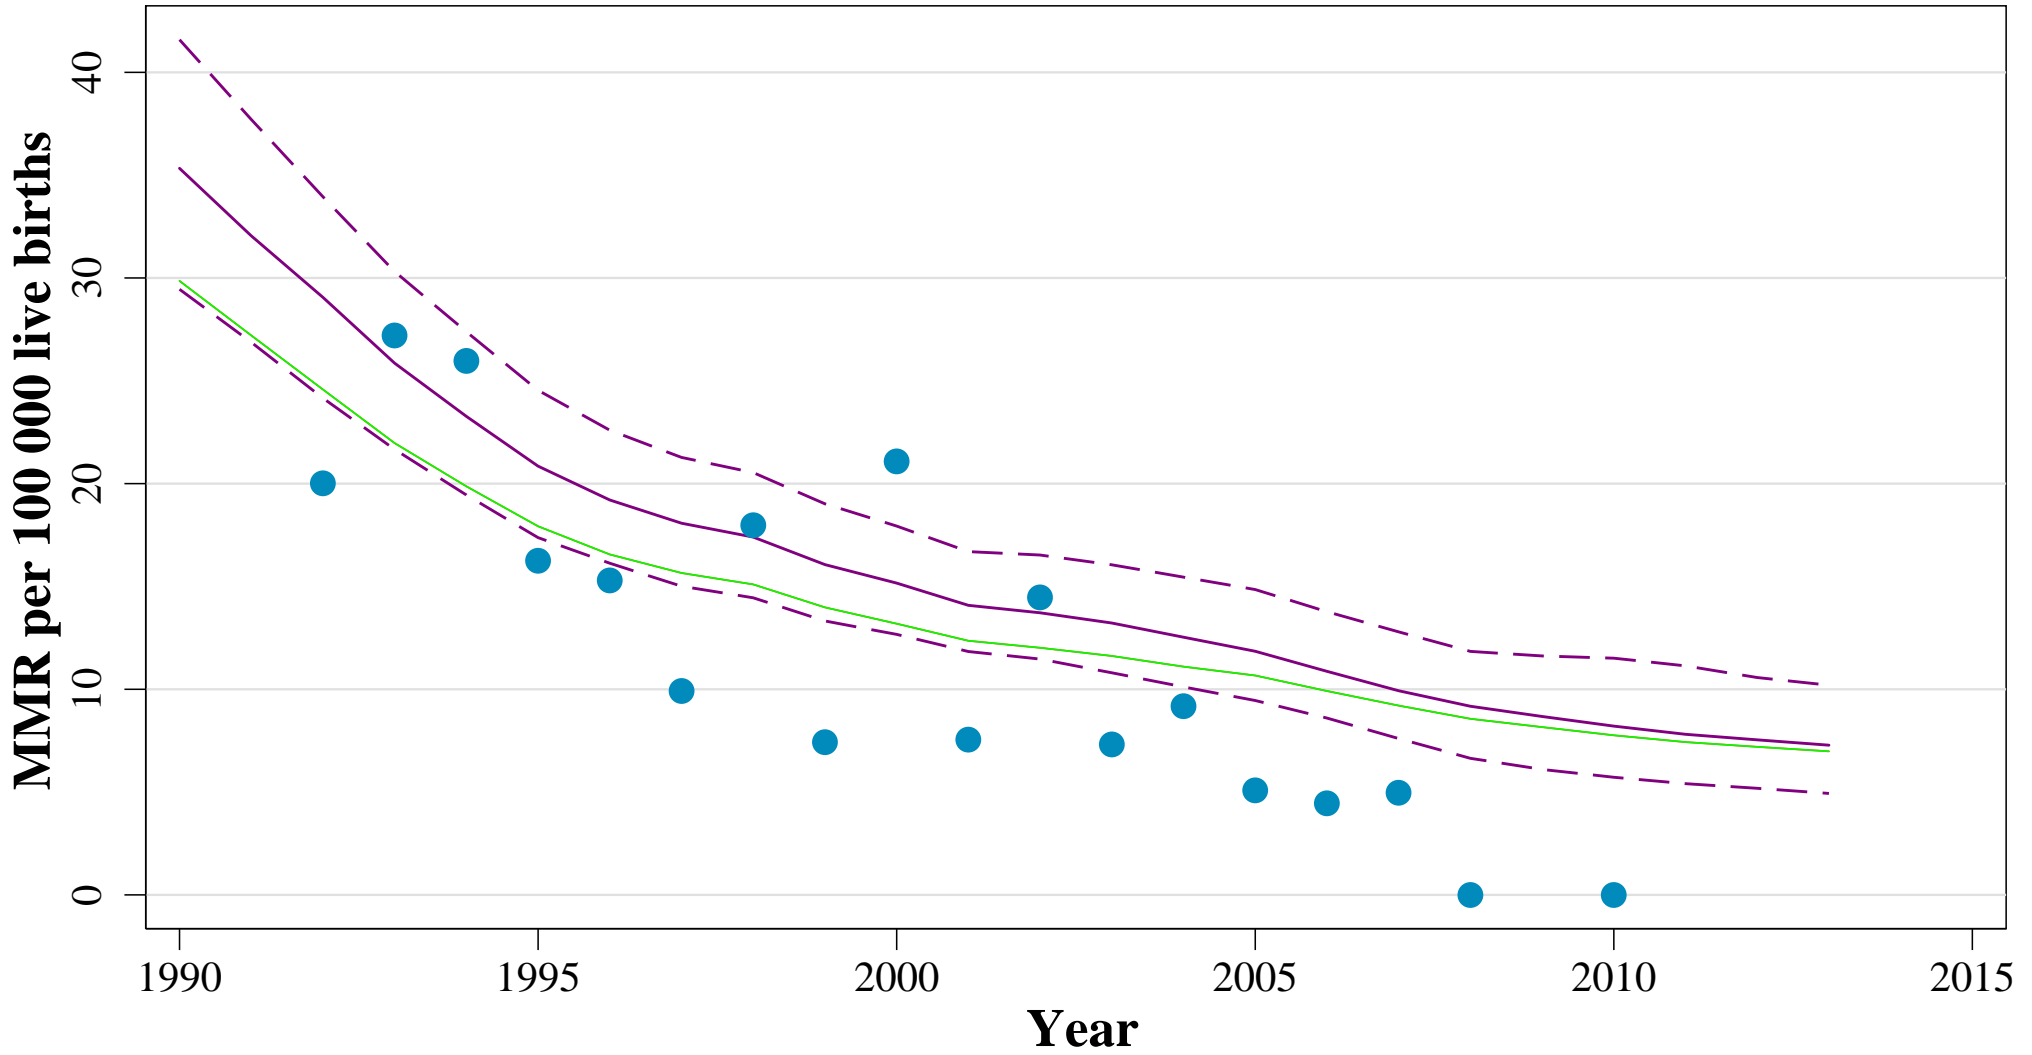

# Algeria

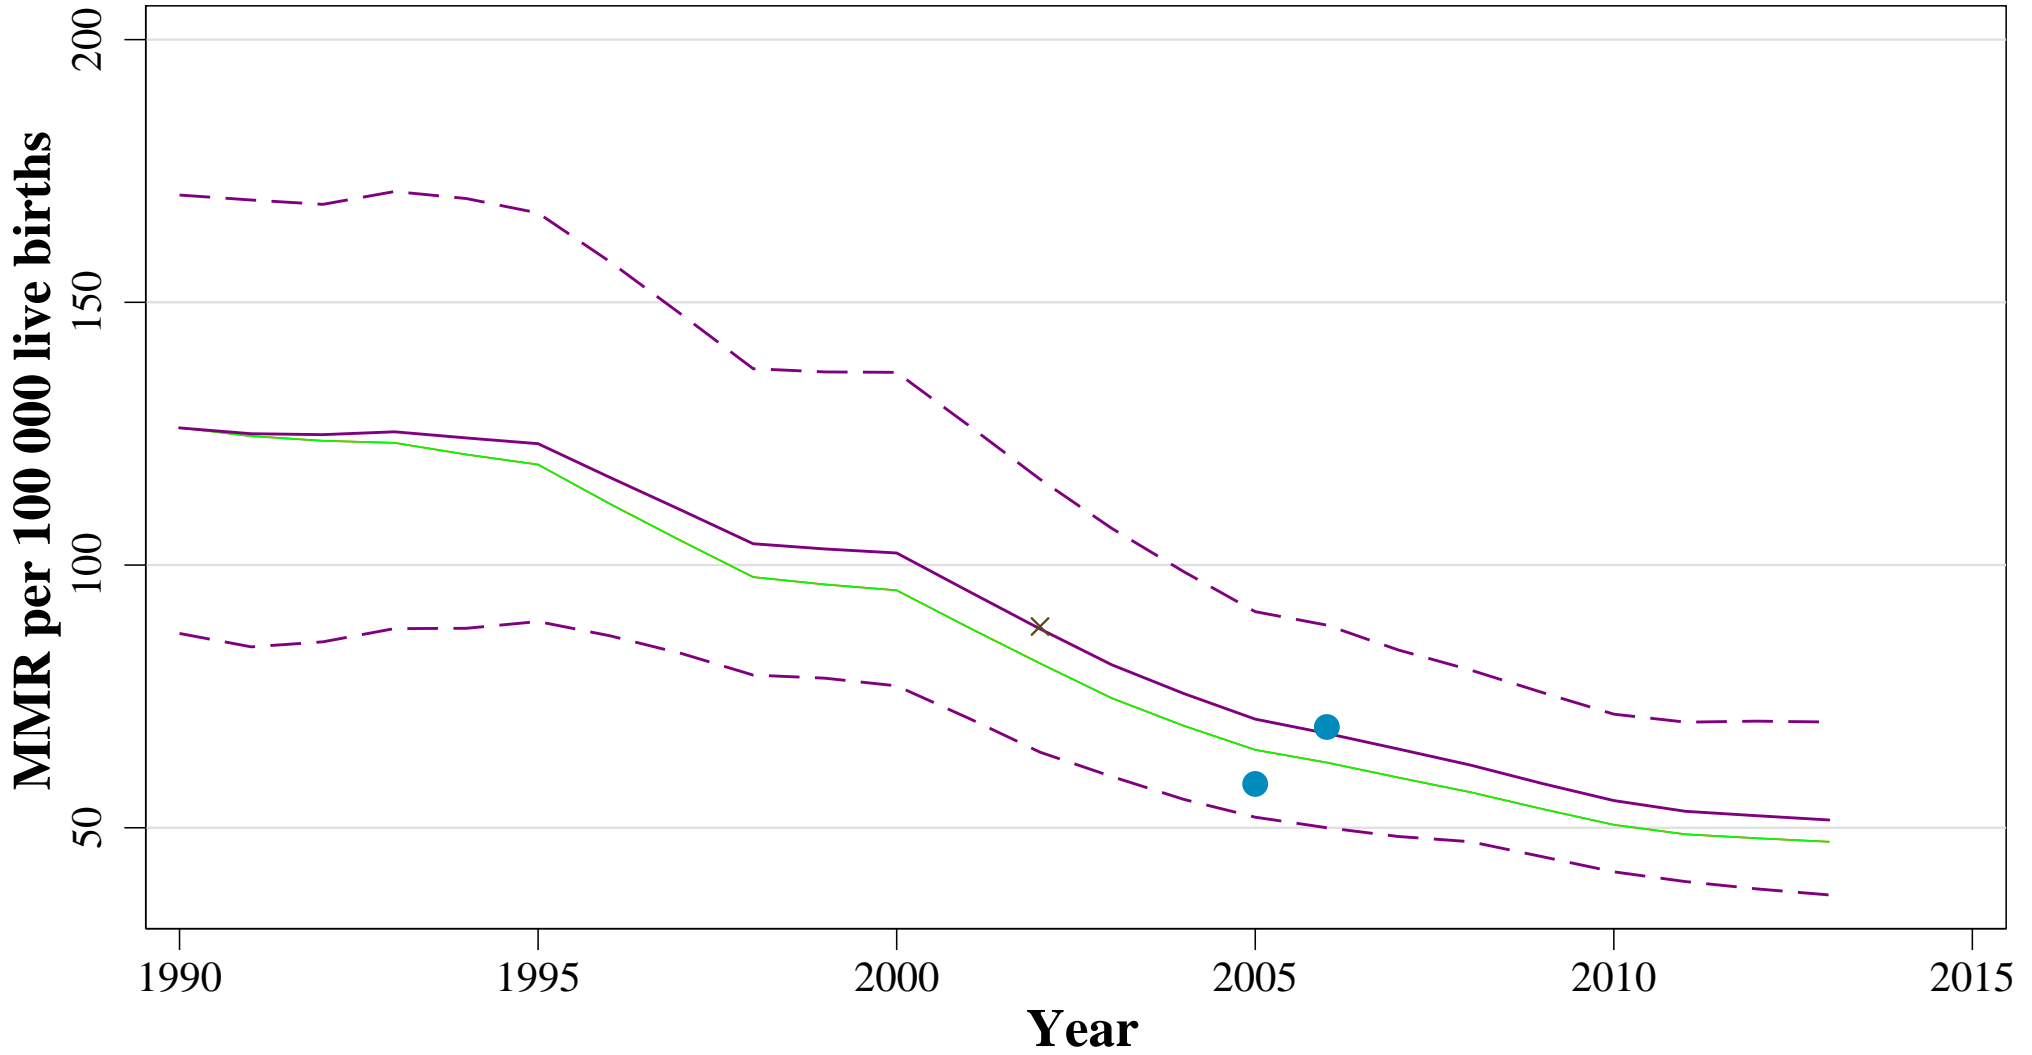

# Andorra

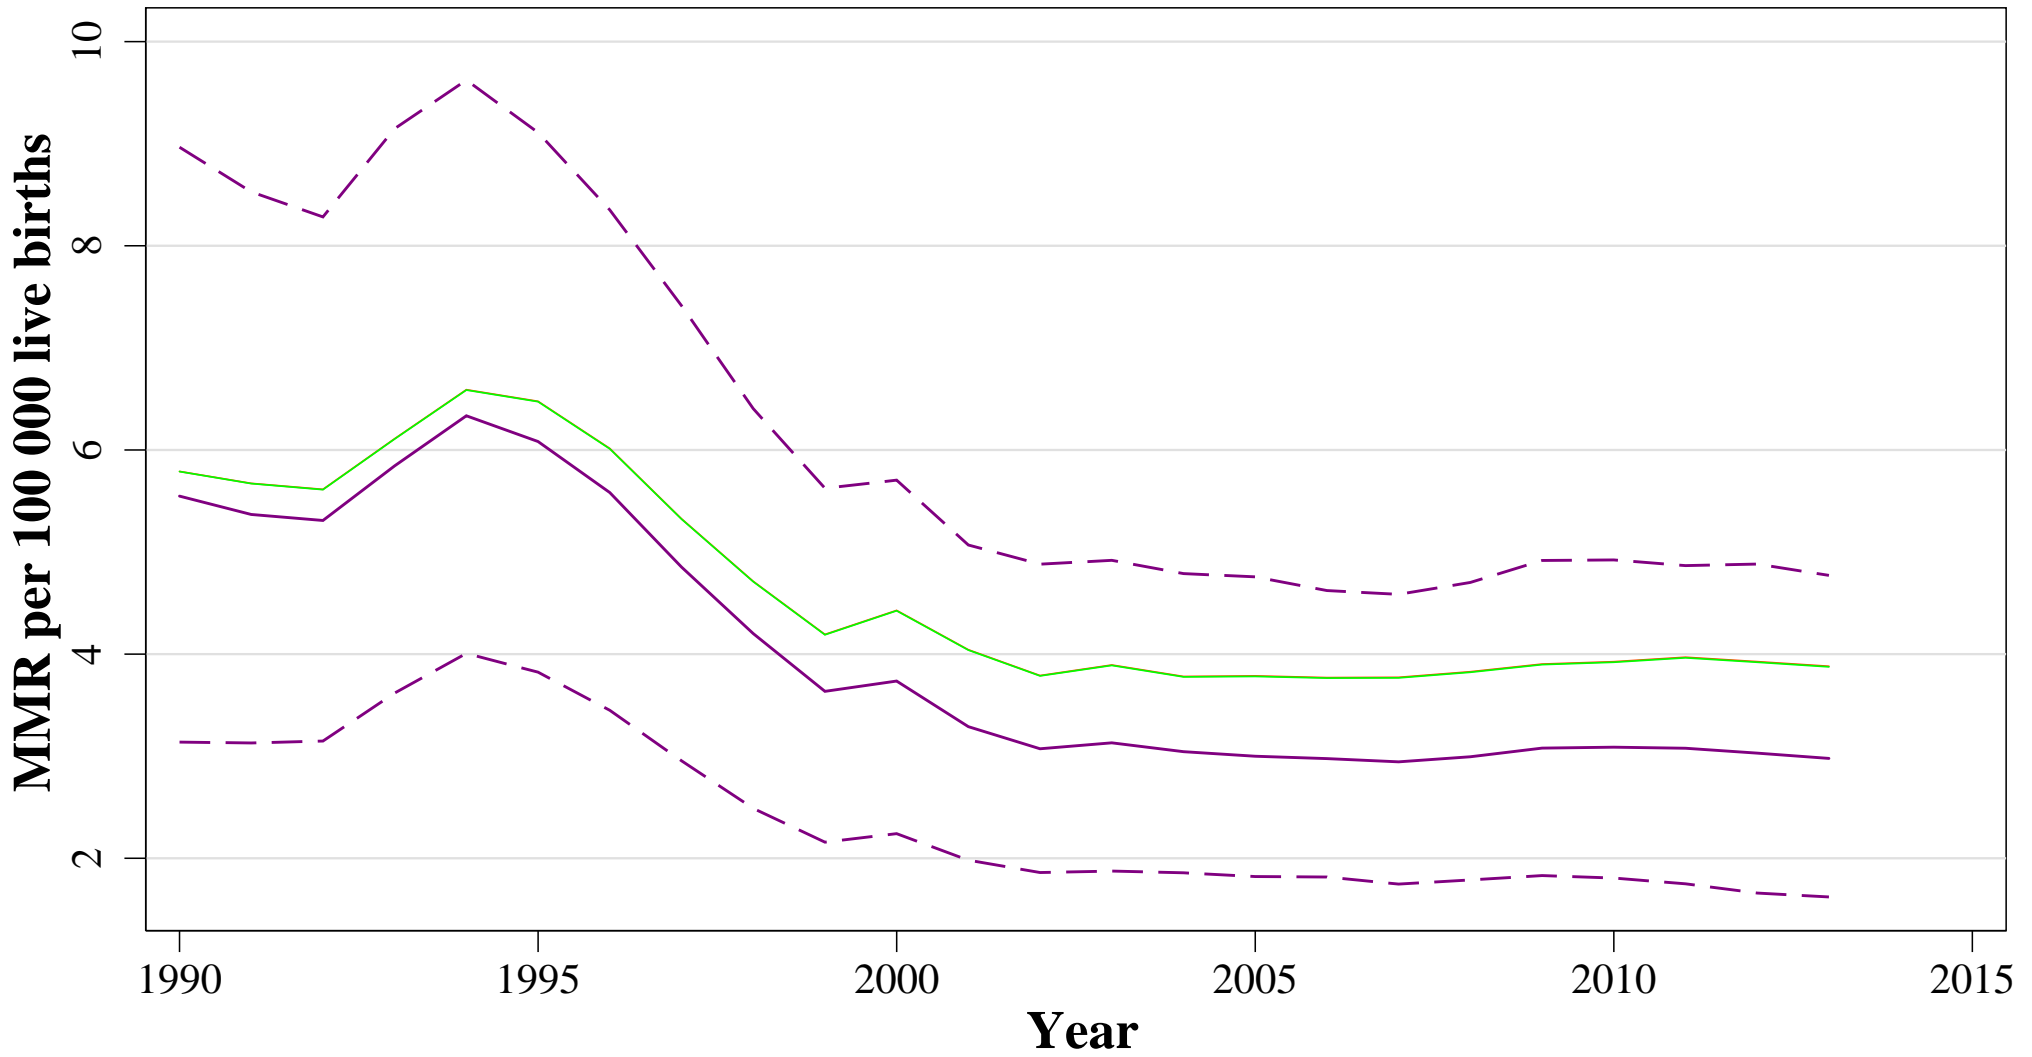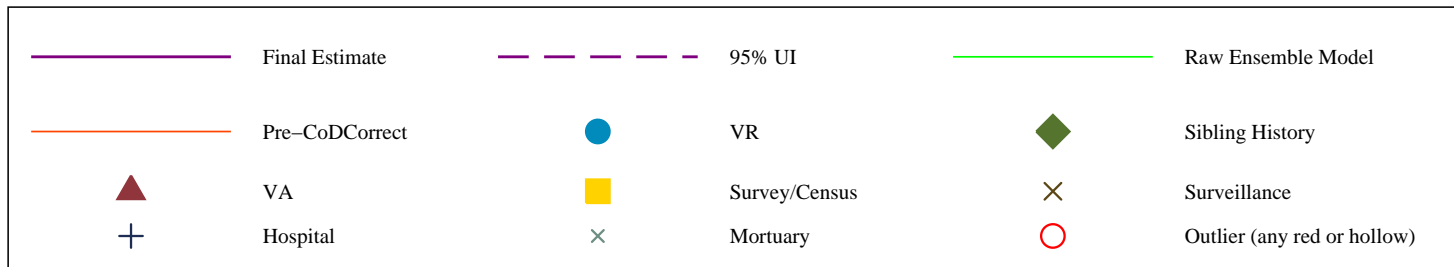

# Angola

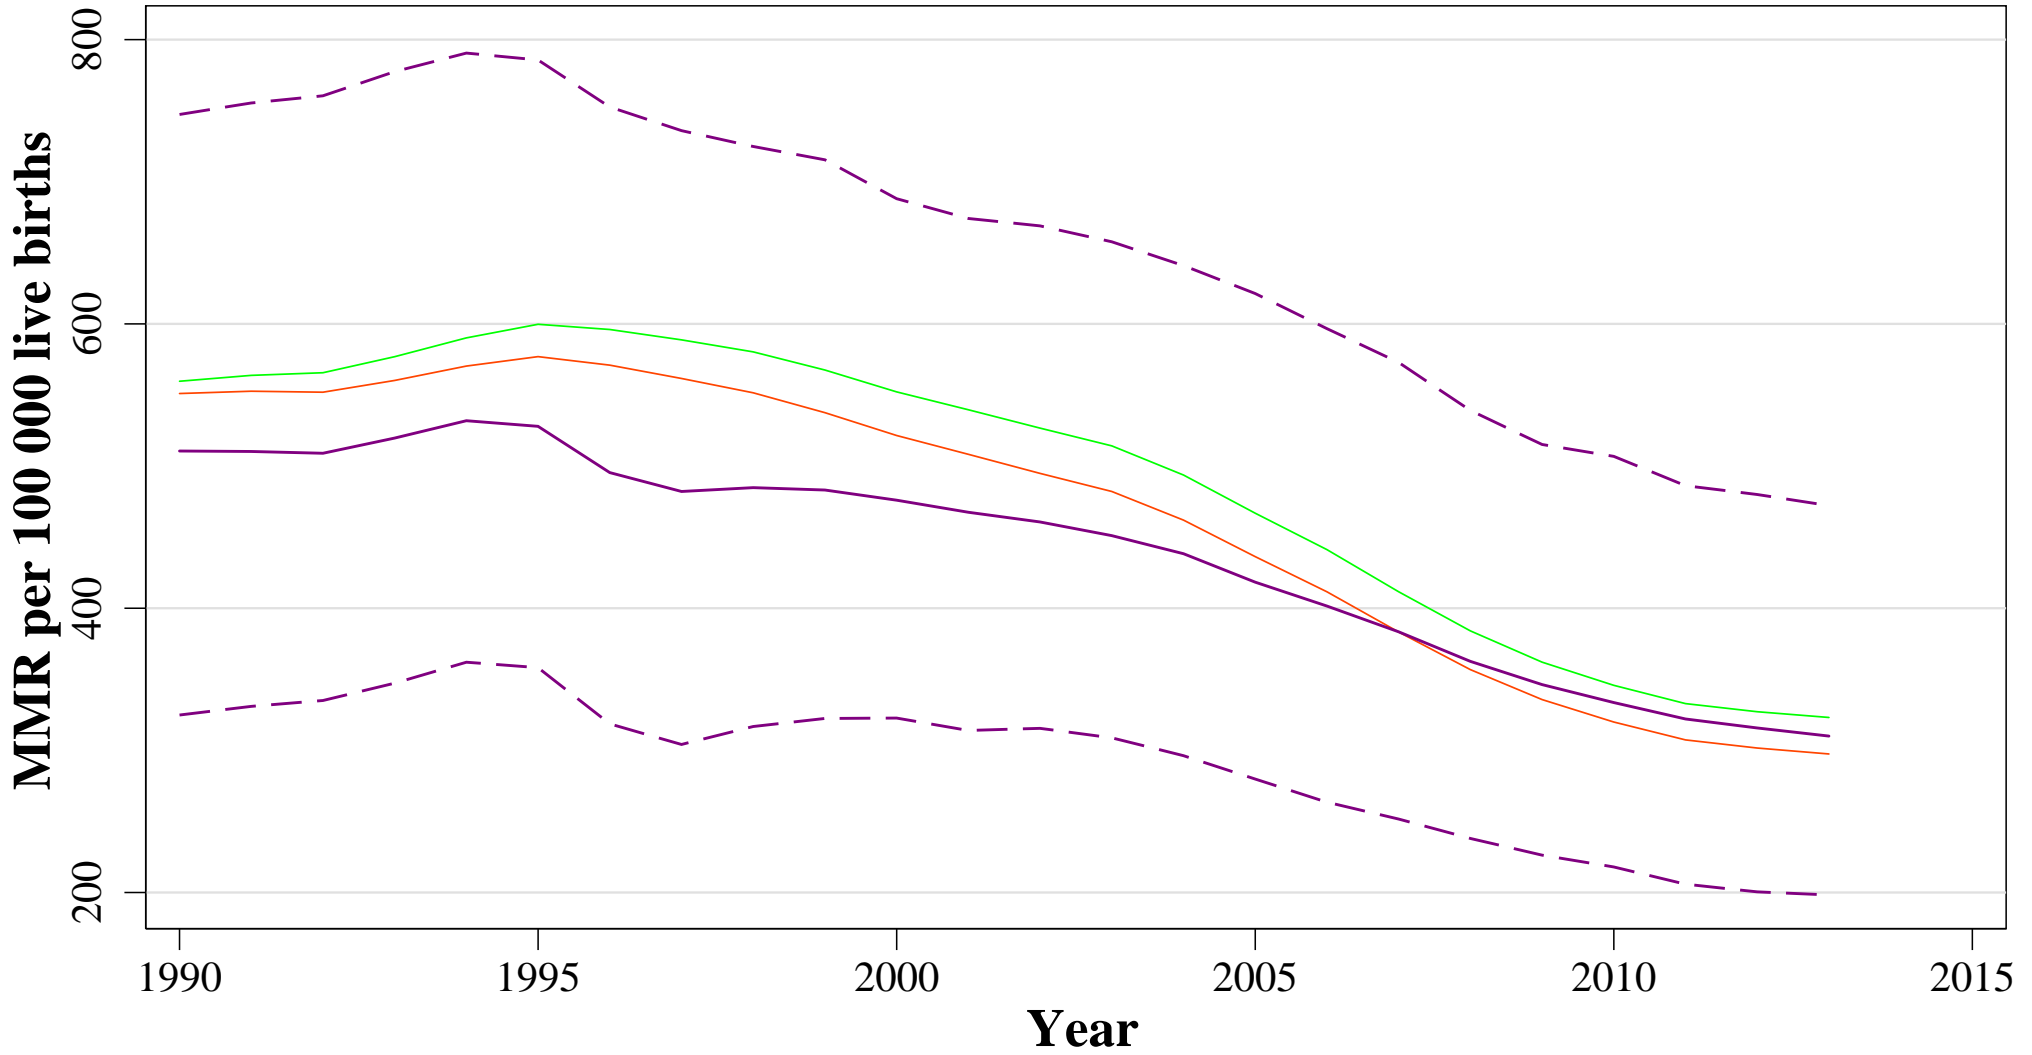



# Antigua and Barbuda

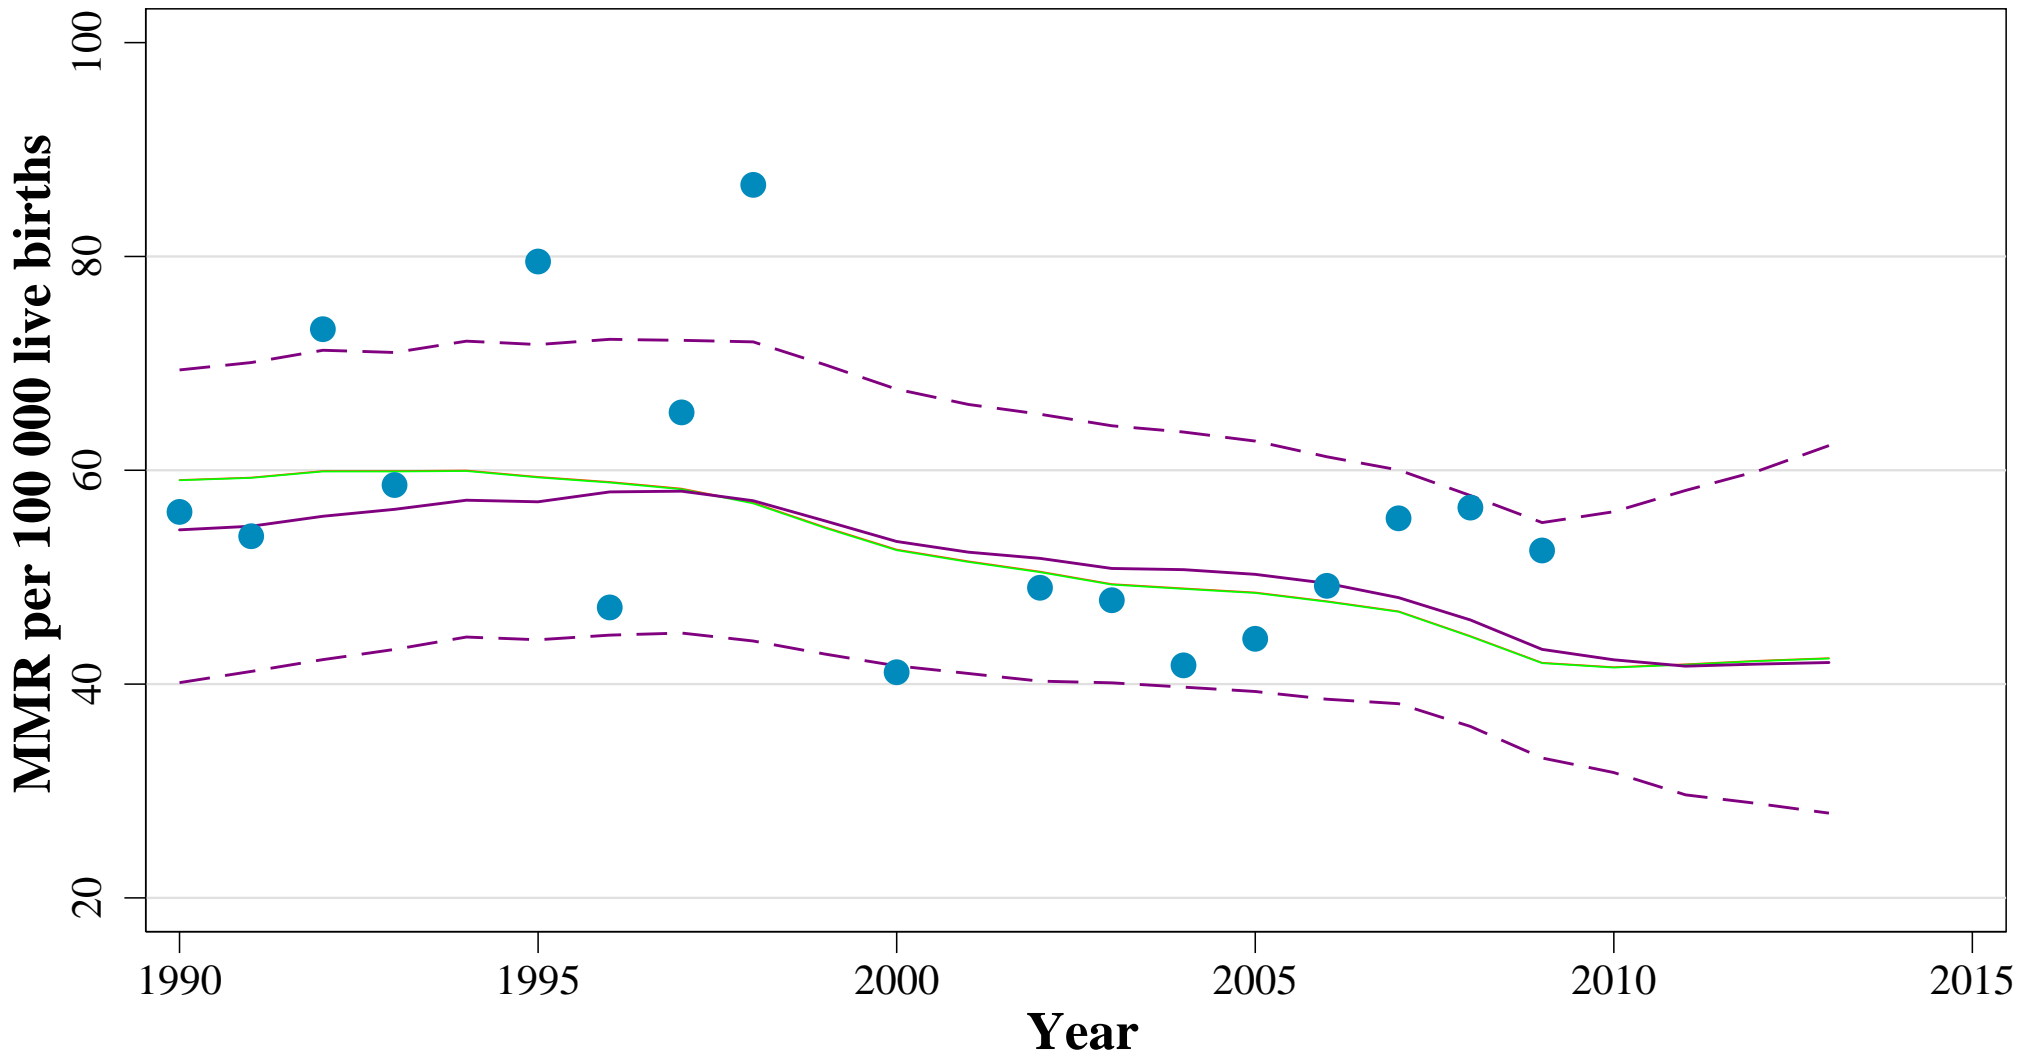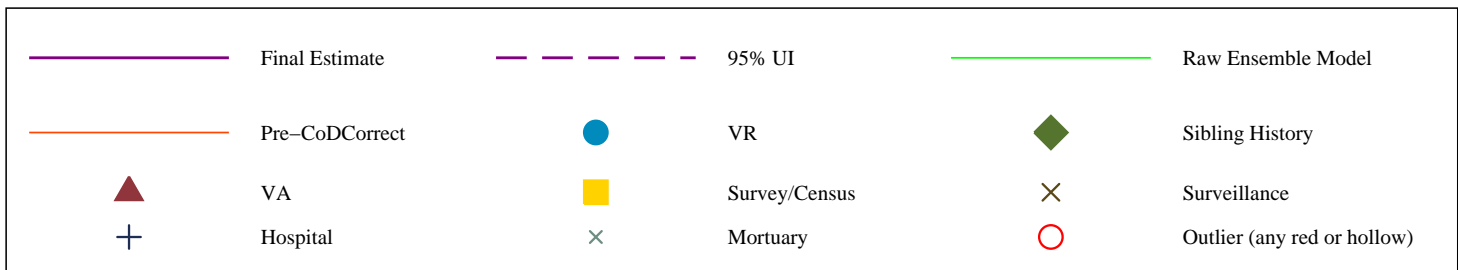

# Argentina

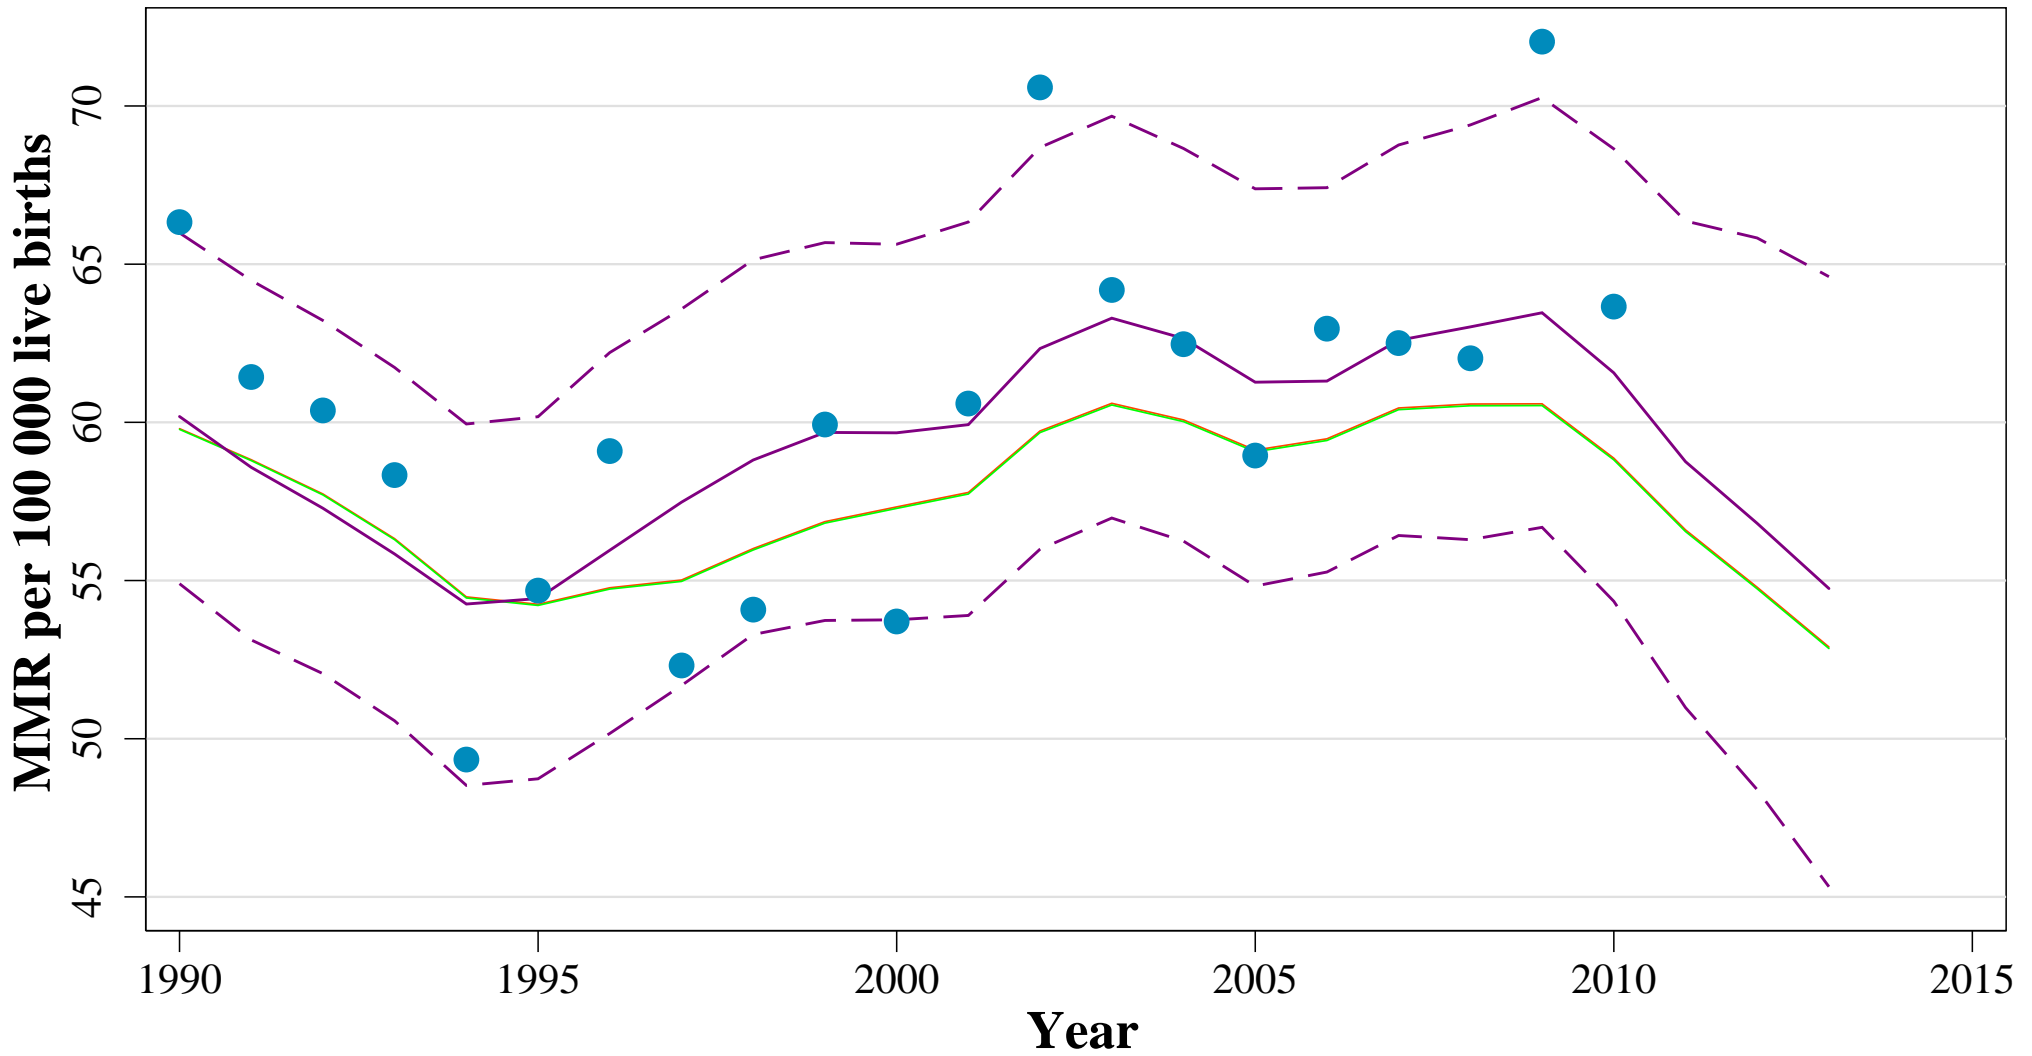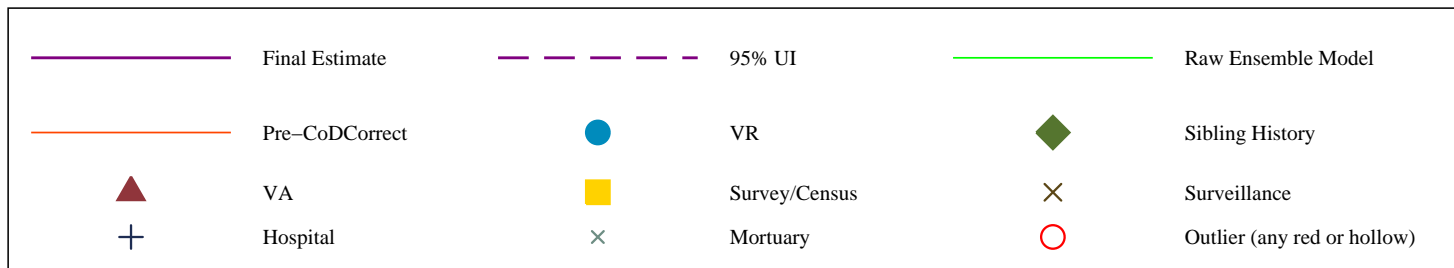

# Armenia

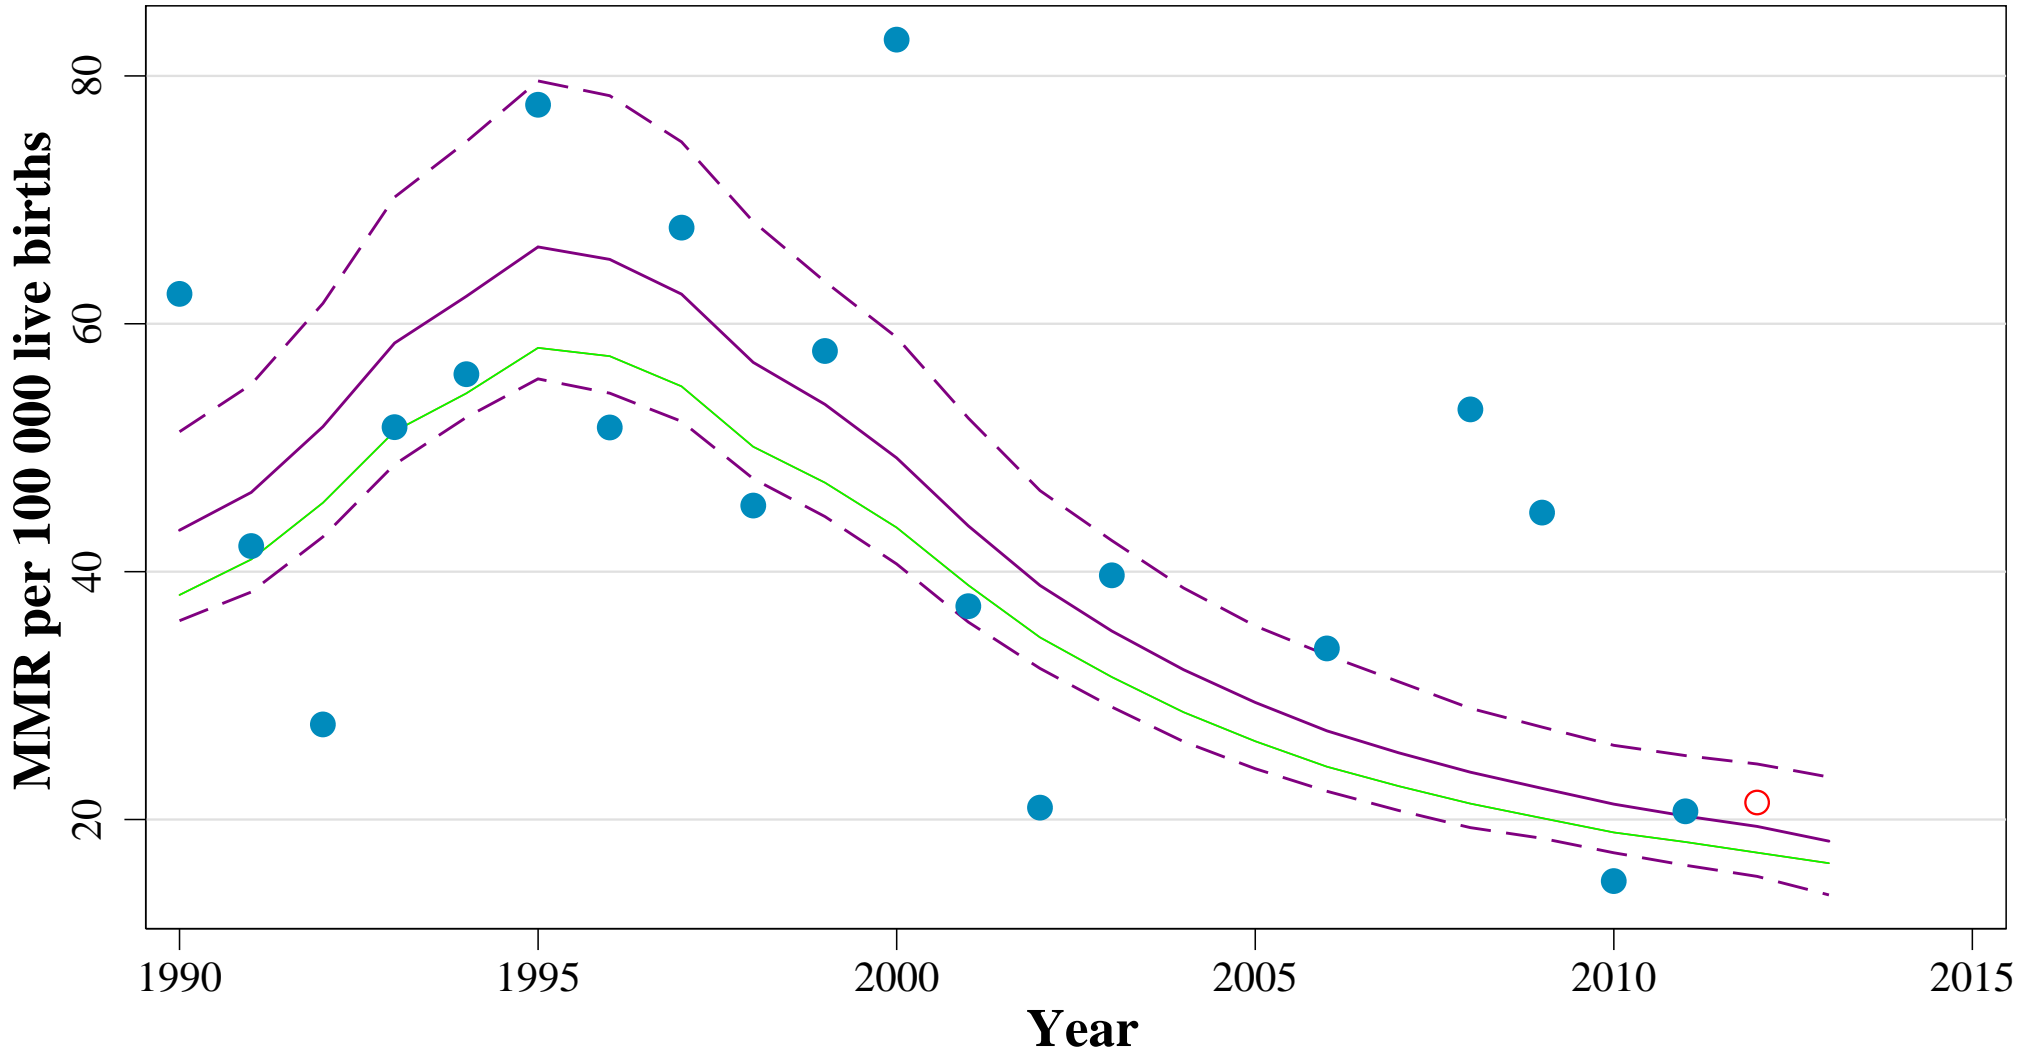

# Australia

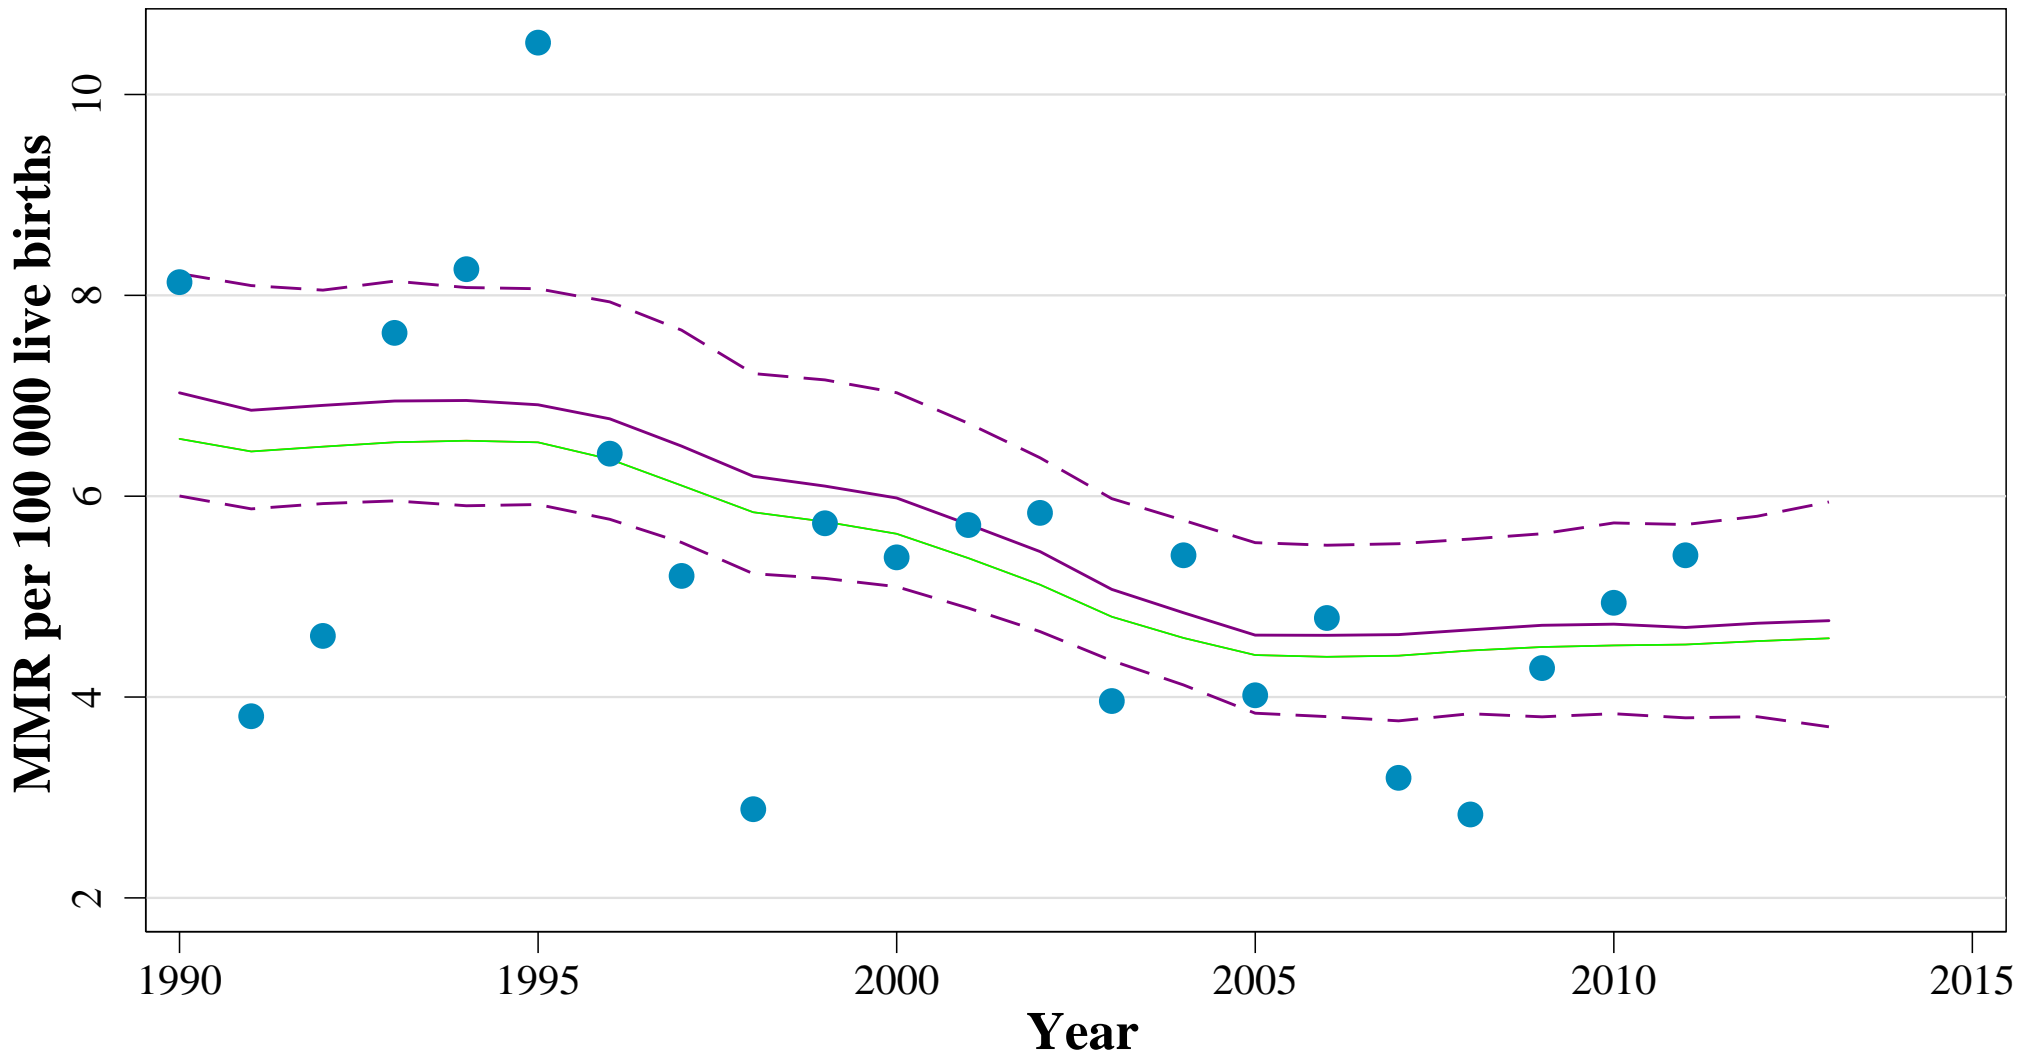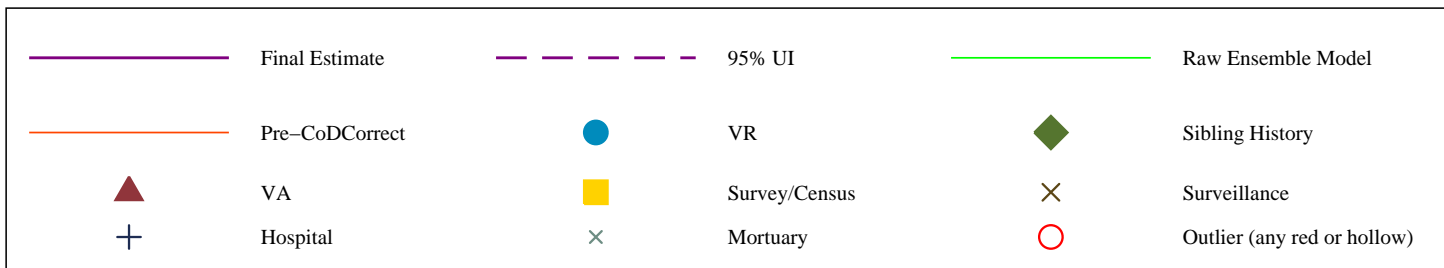

# Austria

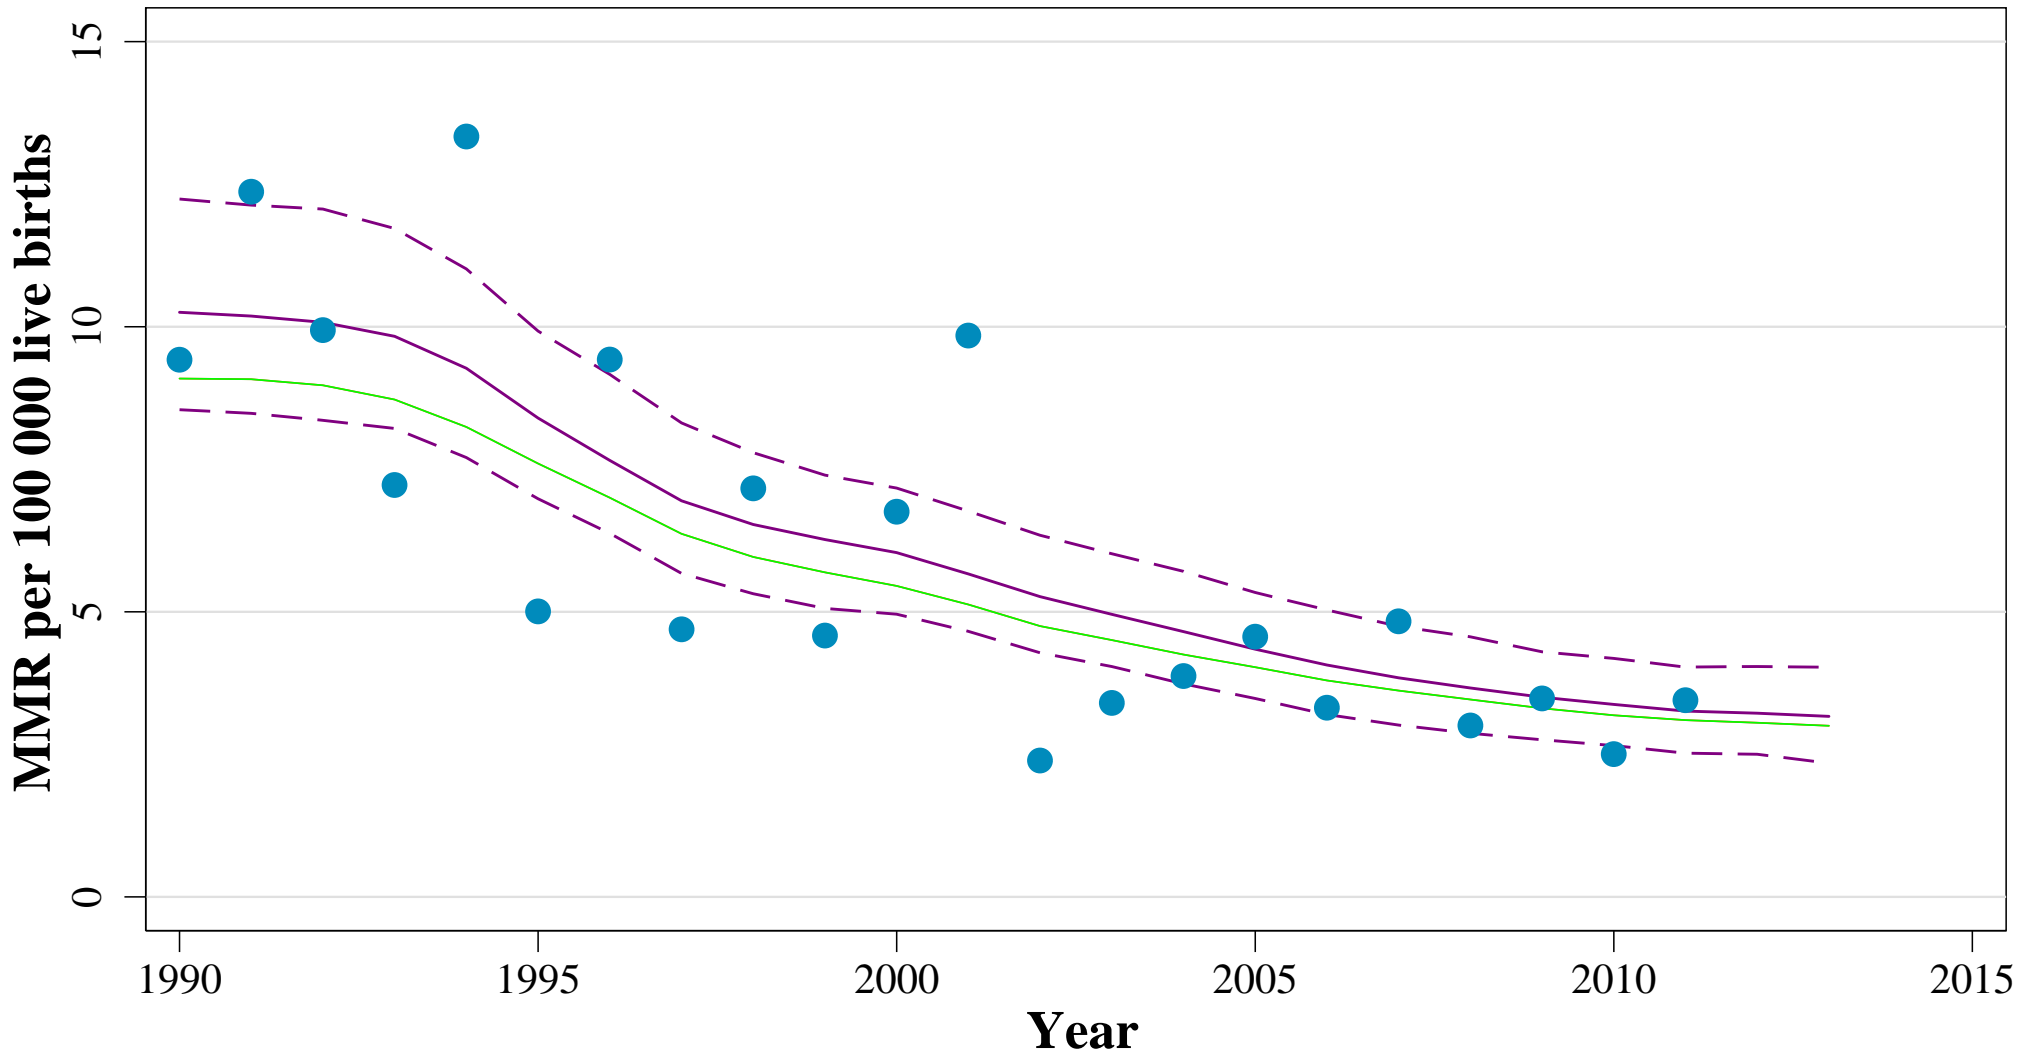

# Azerbaijan

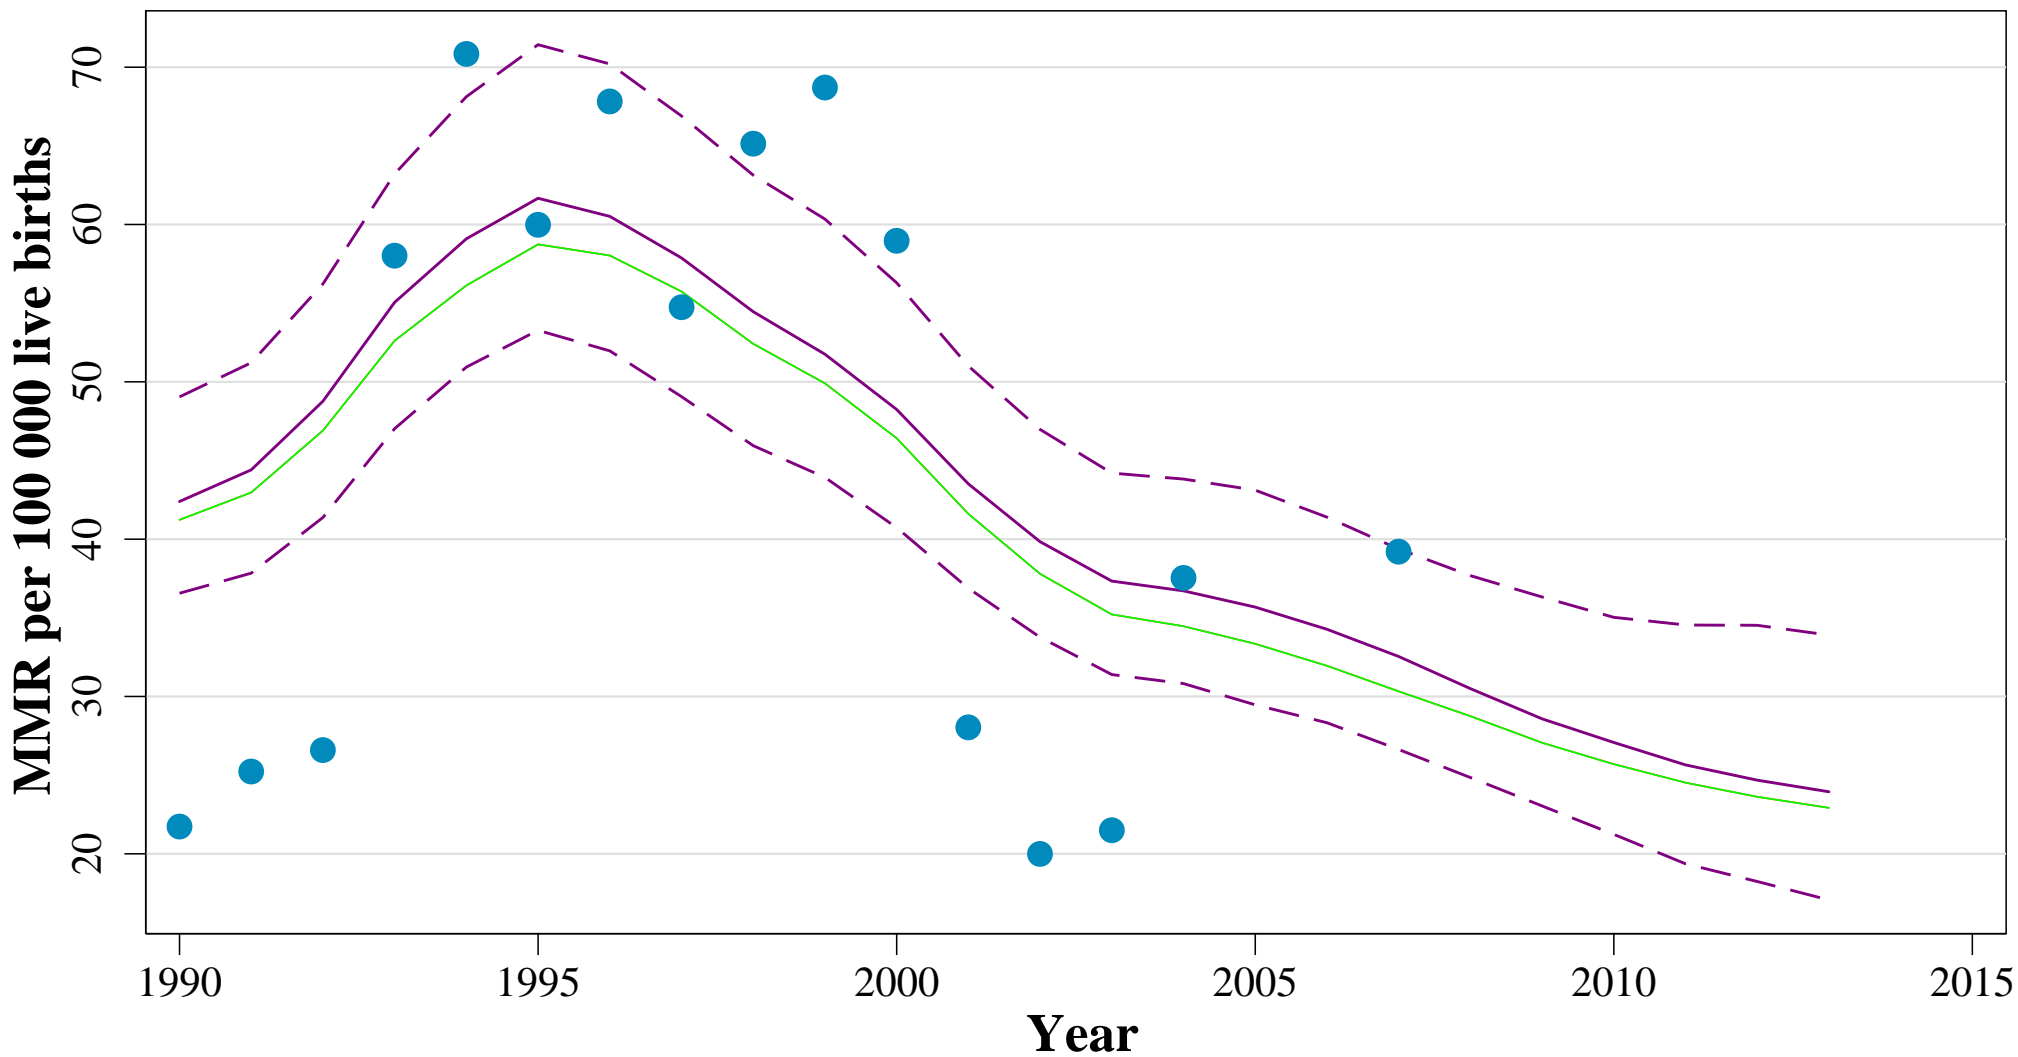

# Bahrain

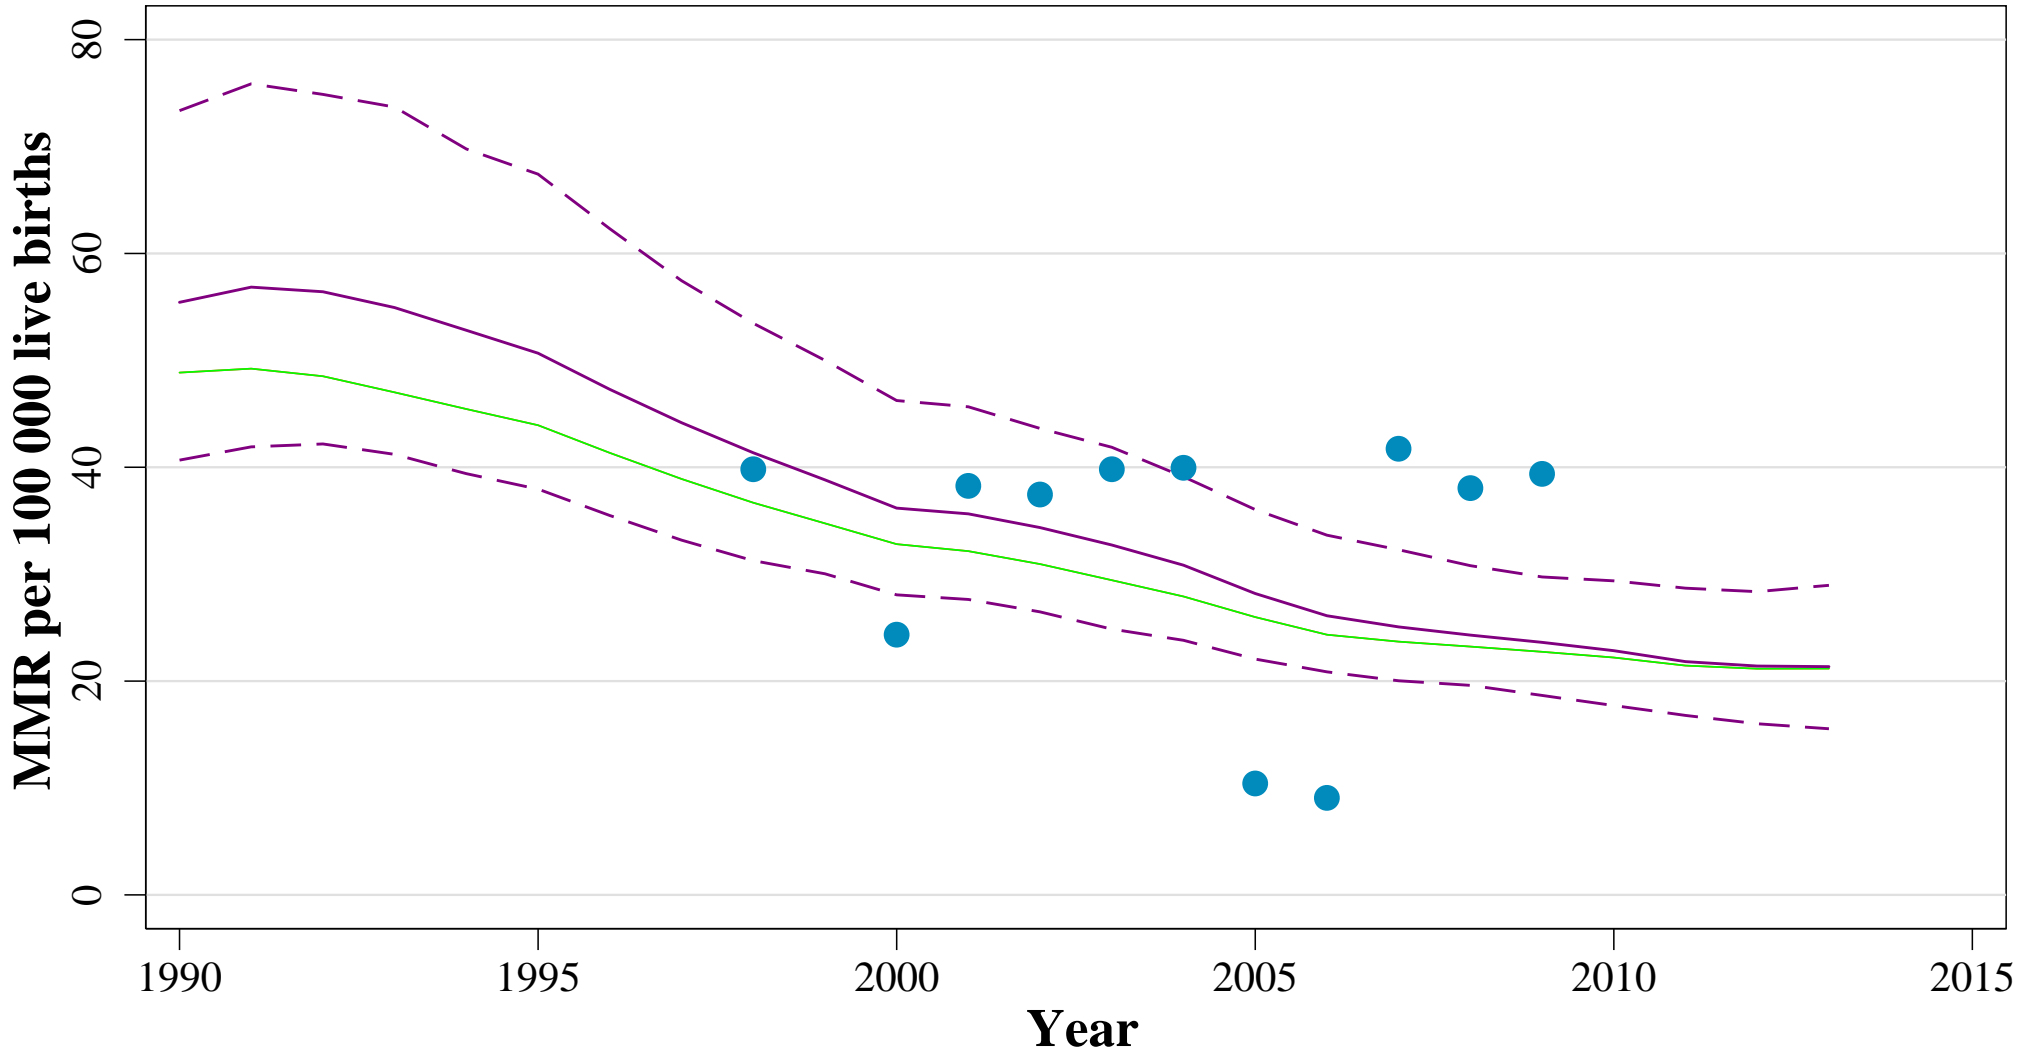

# Bangladesh

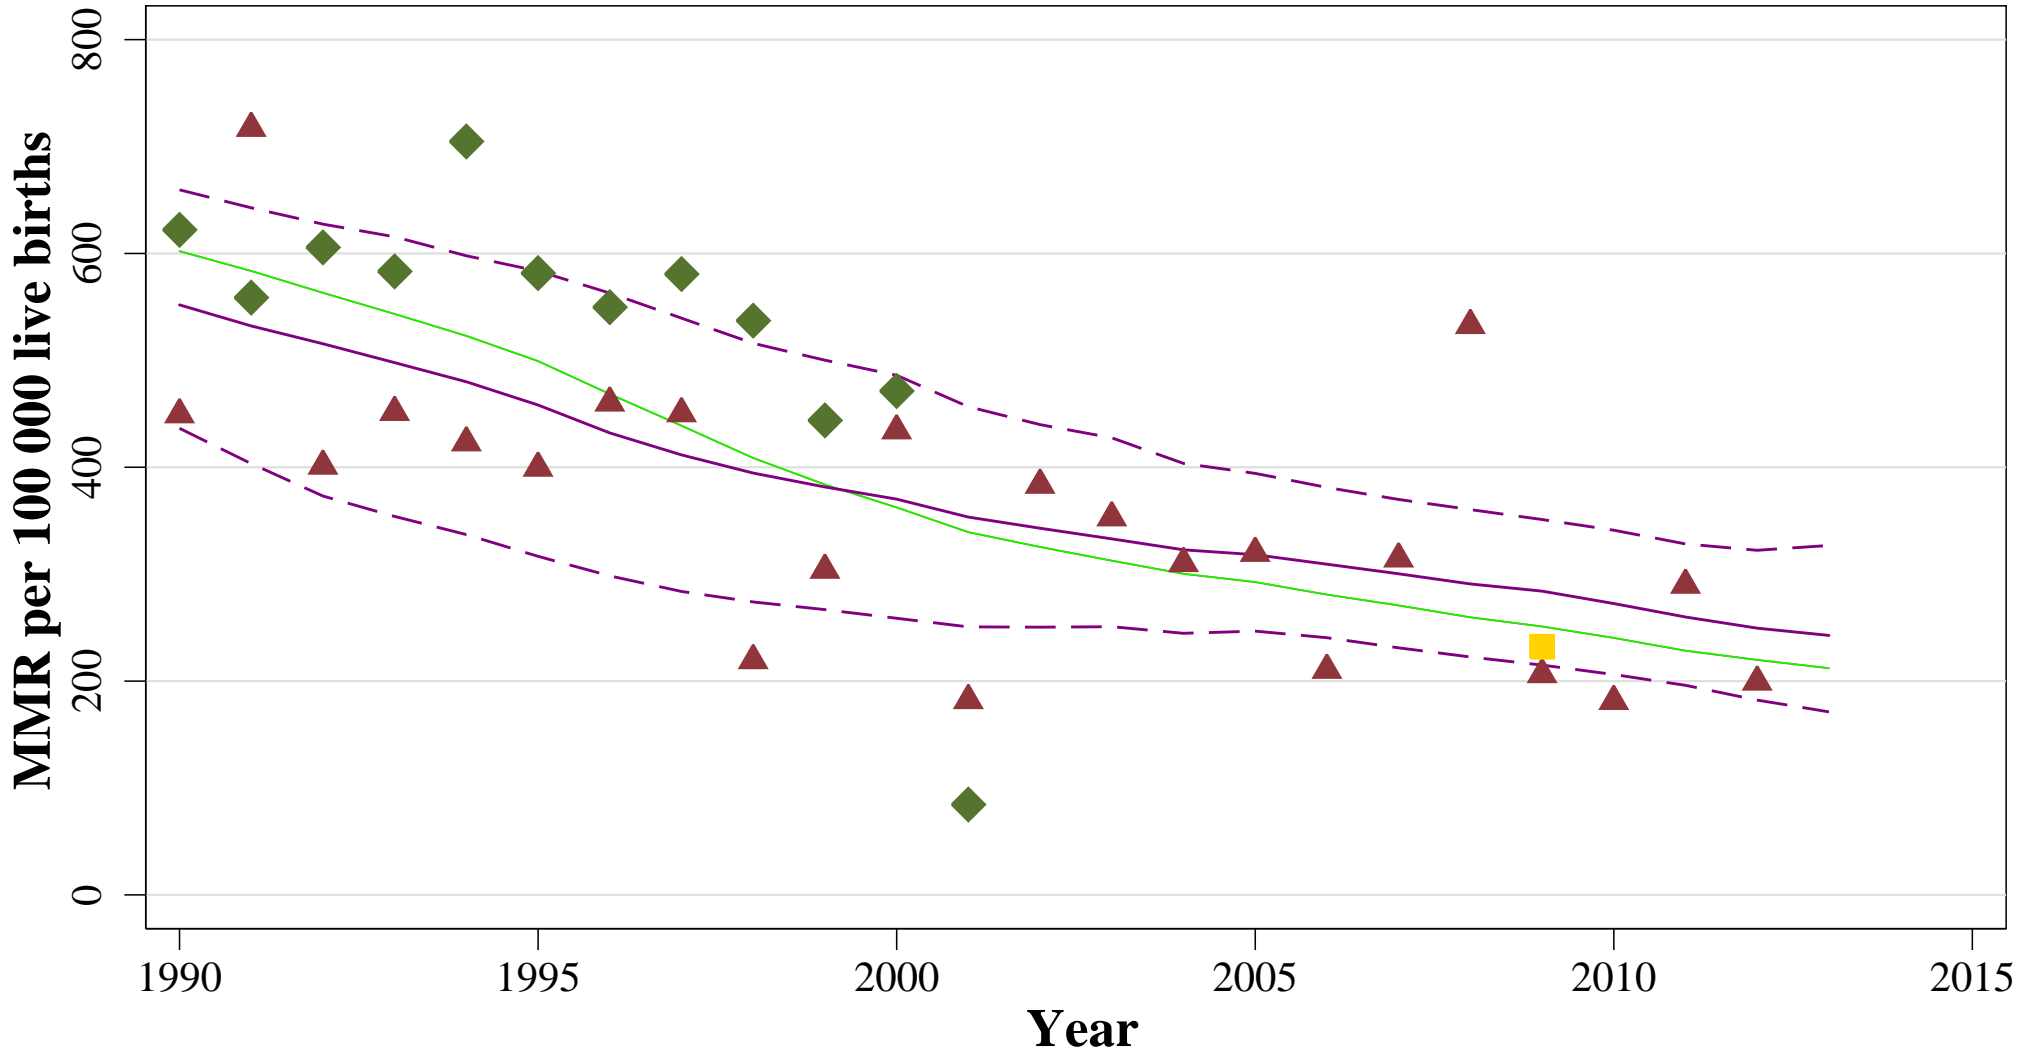



# Barbados

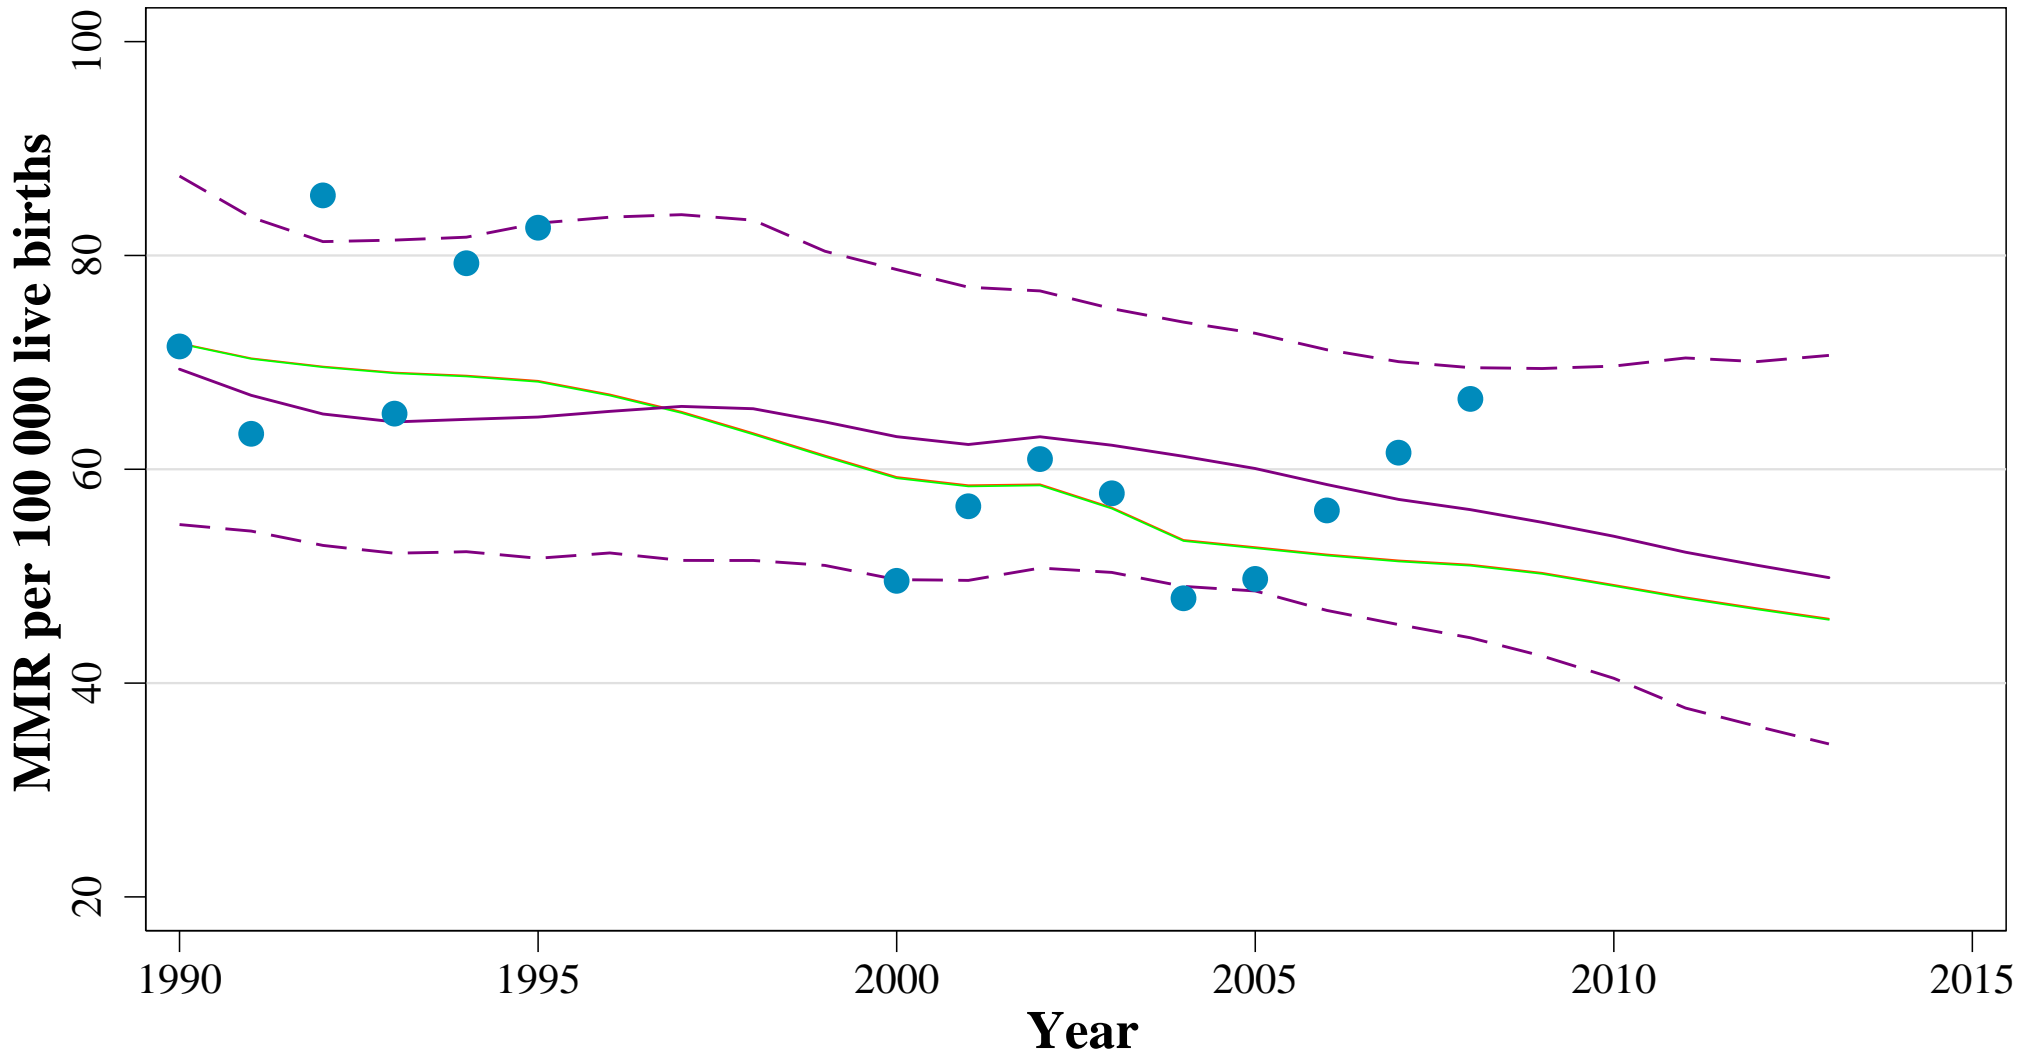

# Belarus

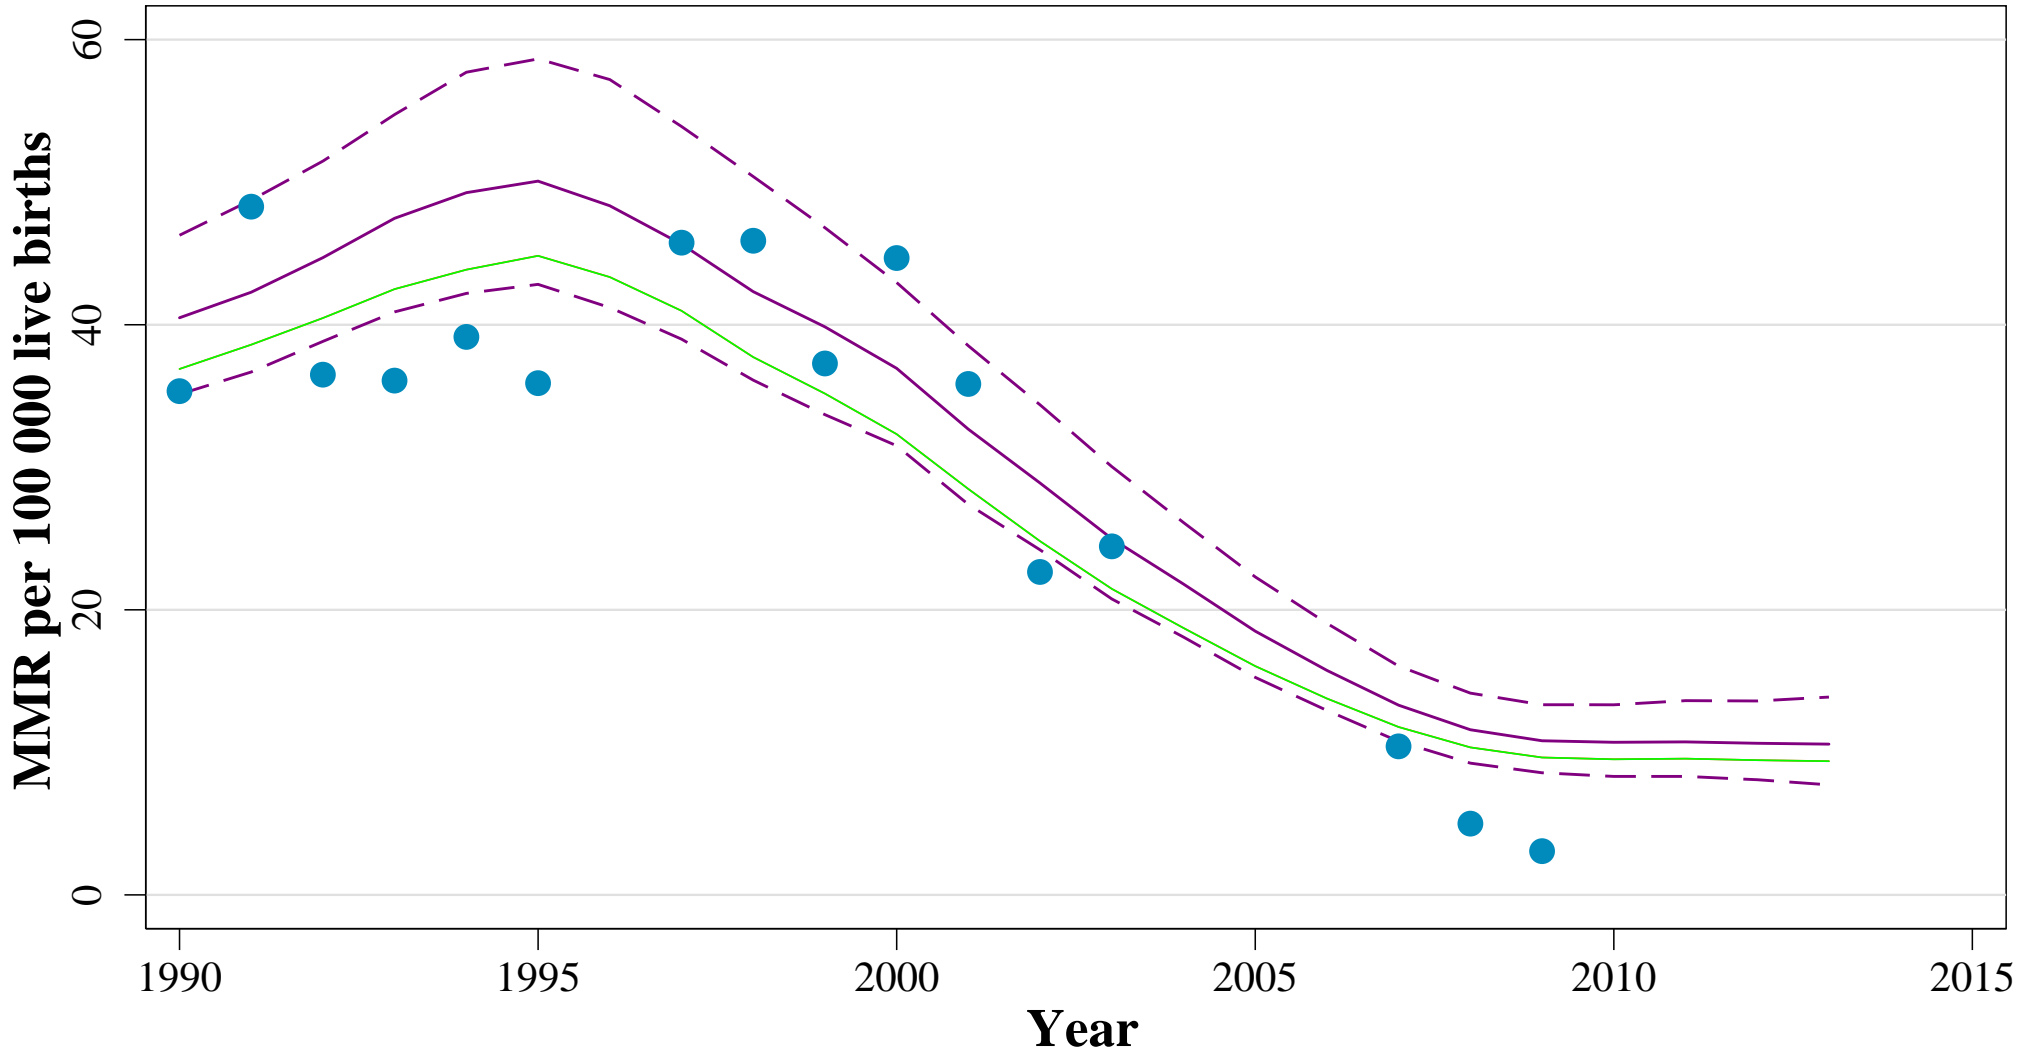

# Belgium

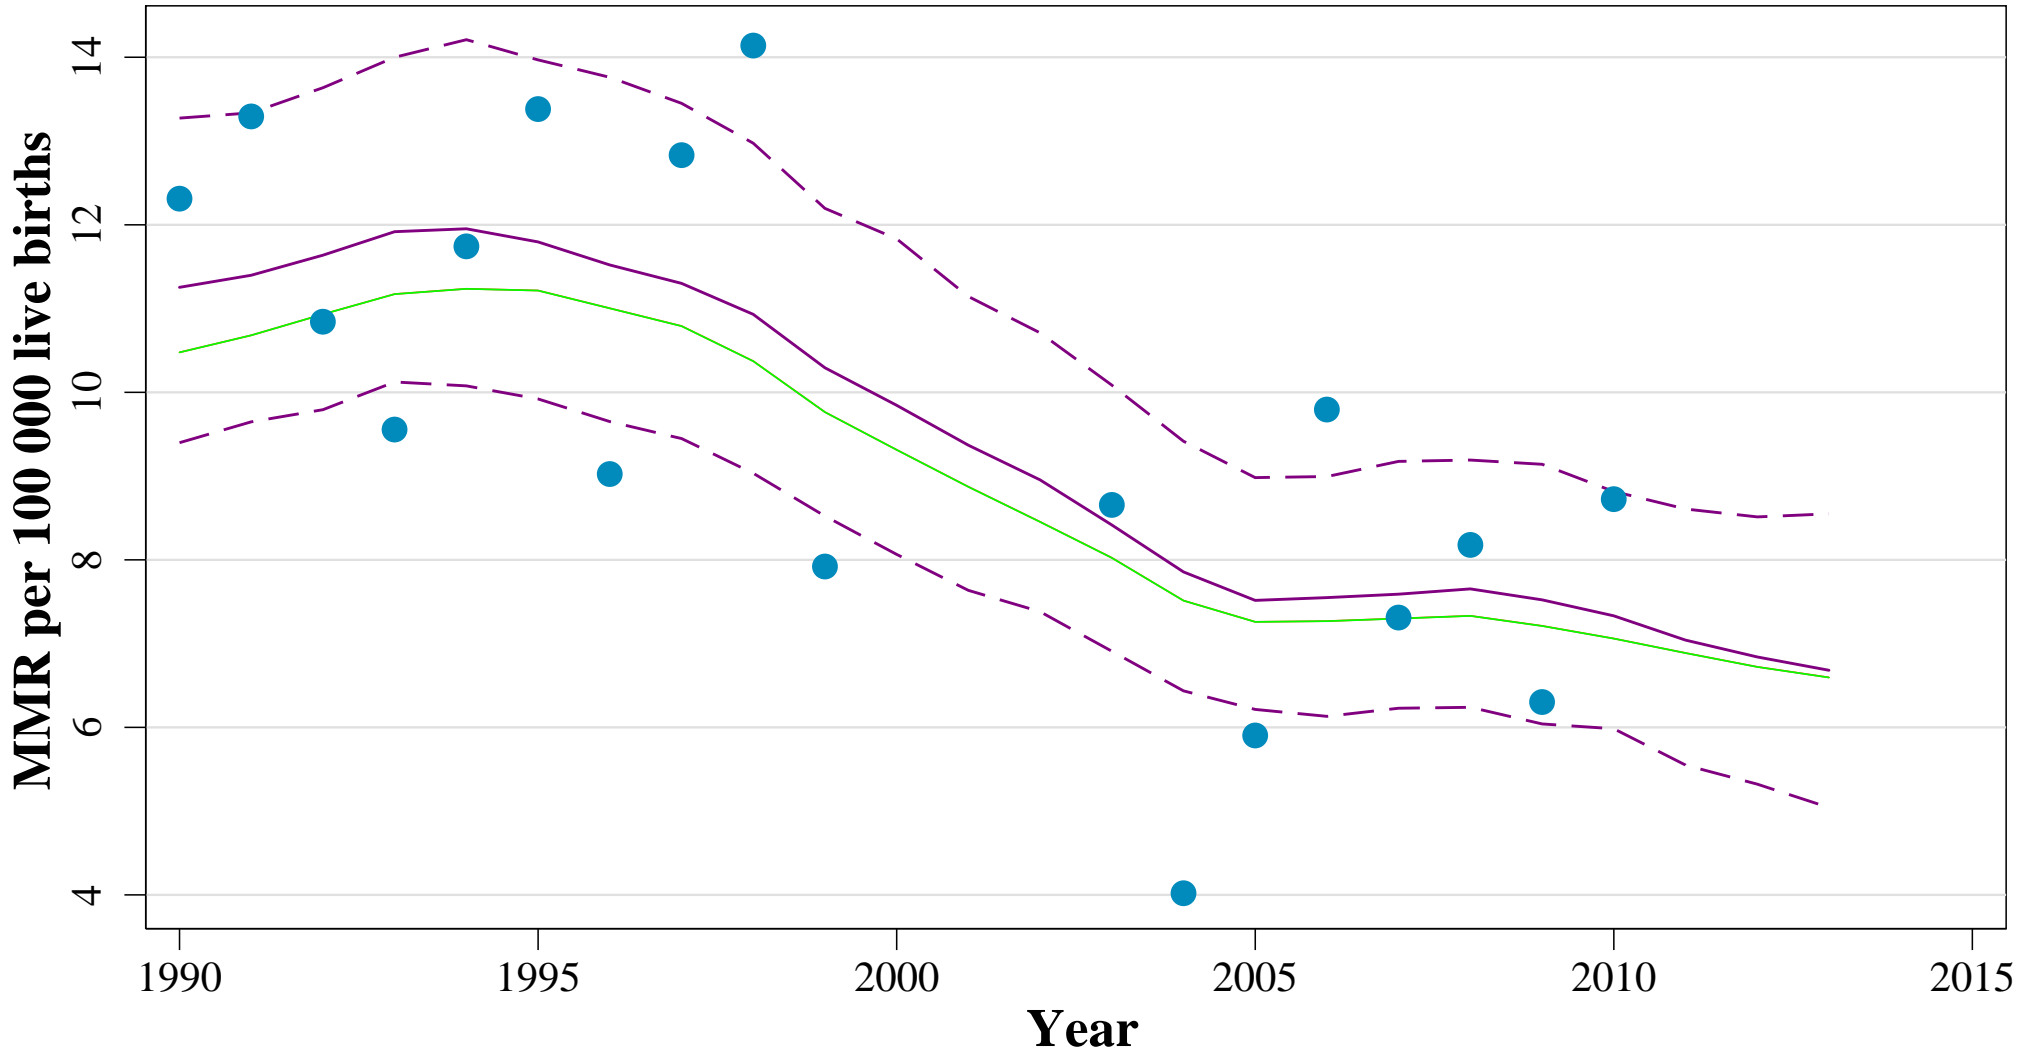

# Belize

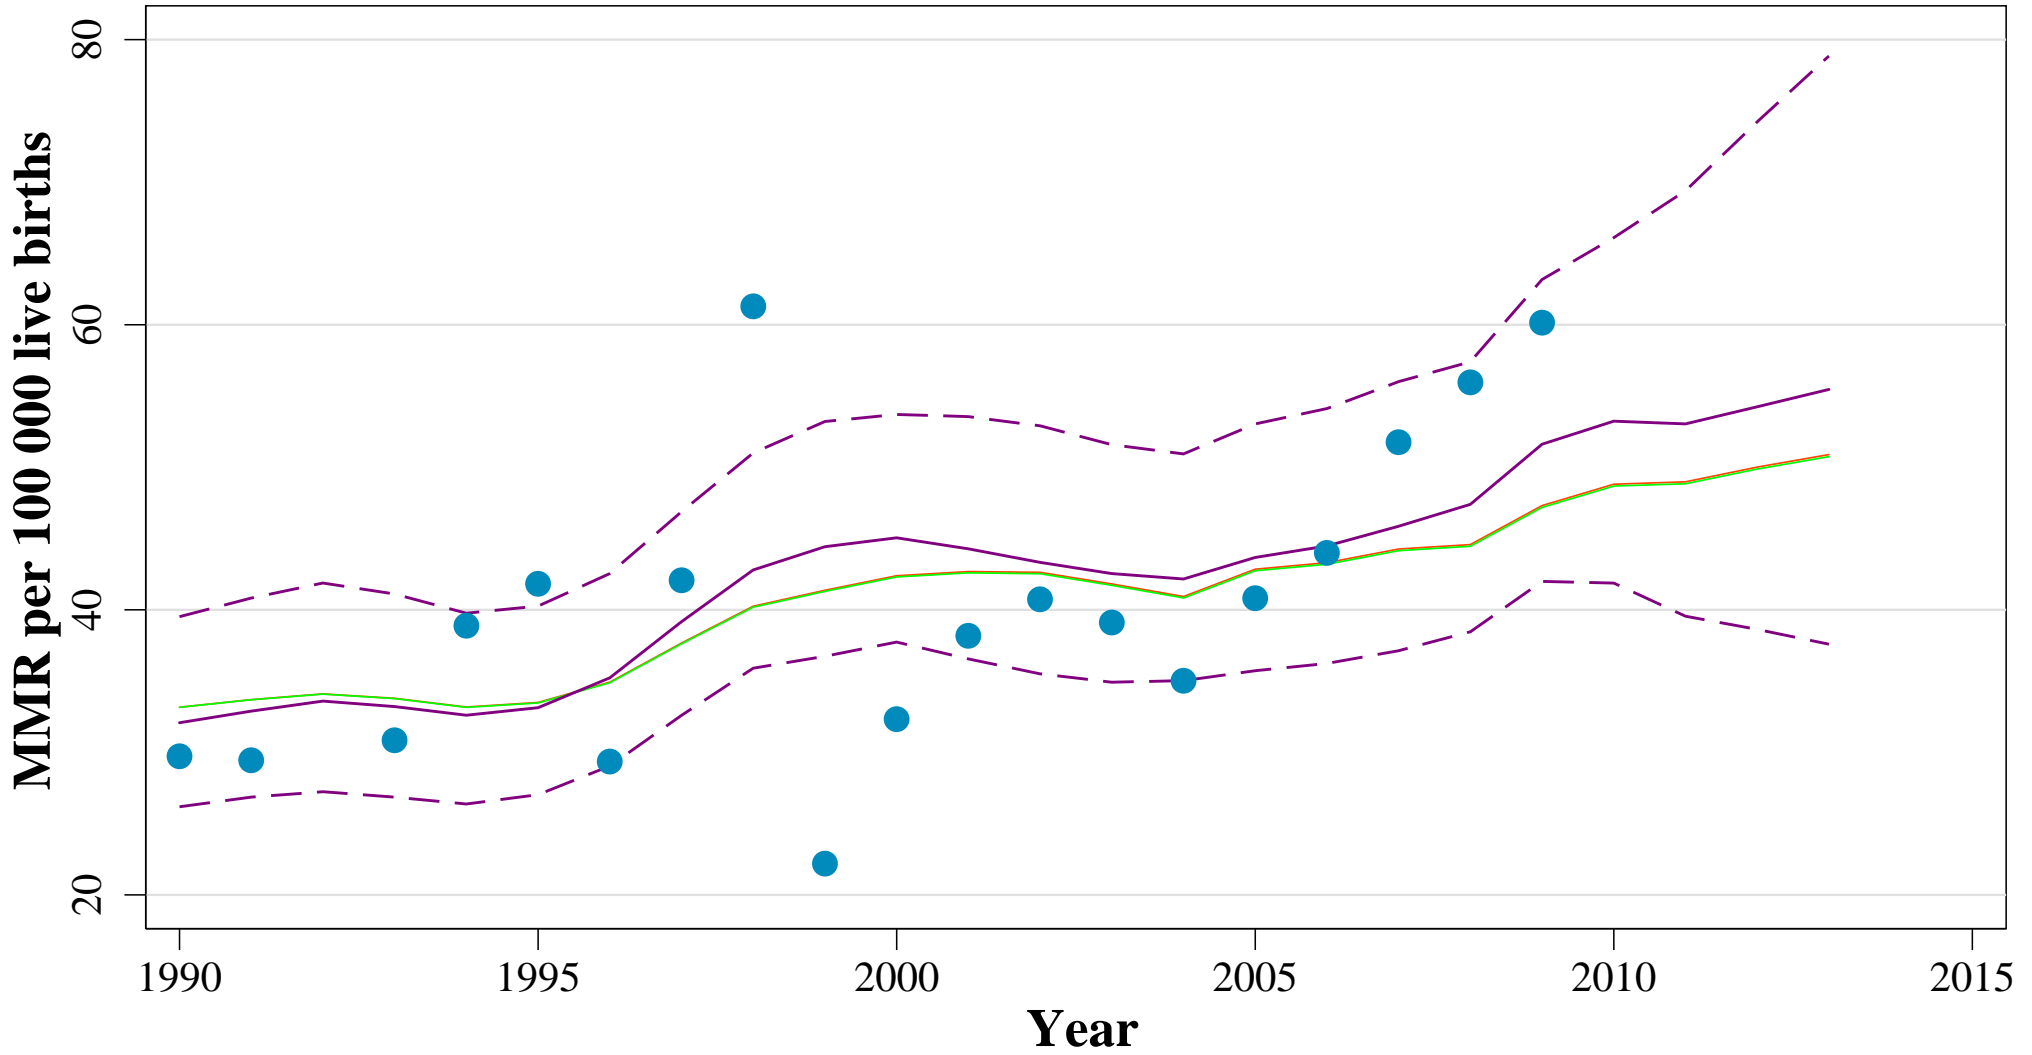

# Benin

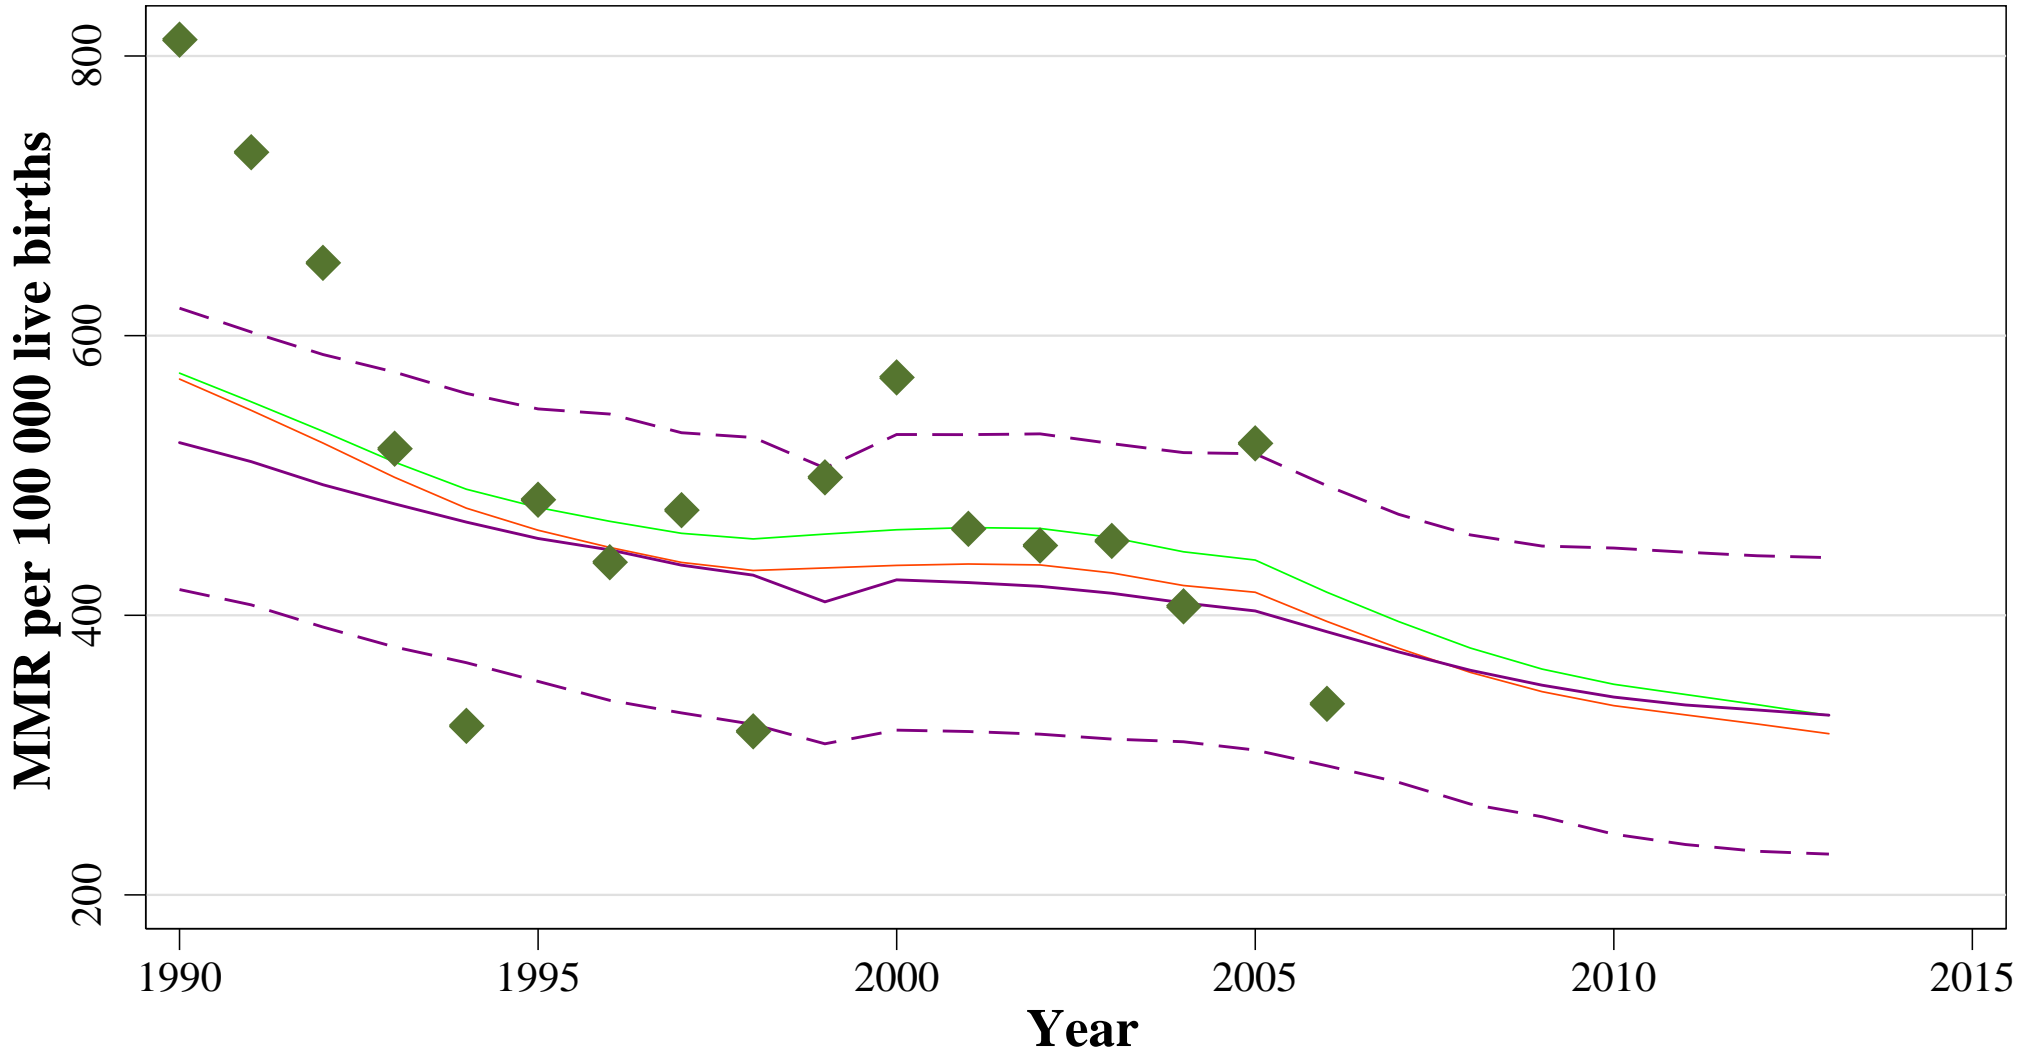

# Bhutan

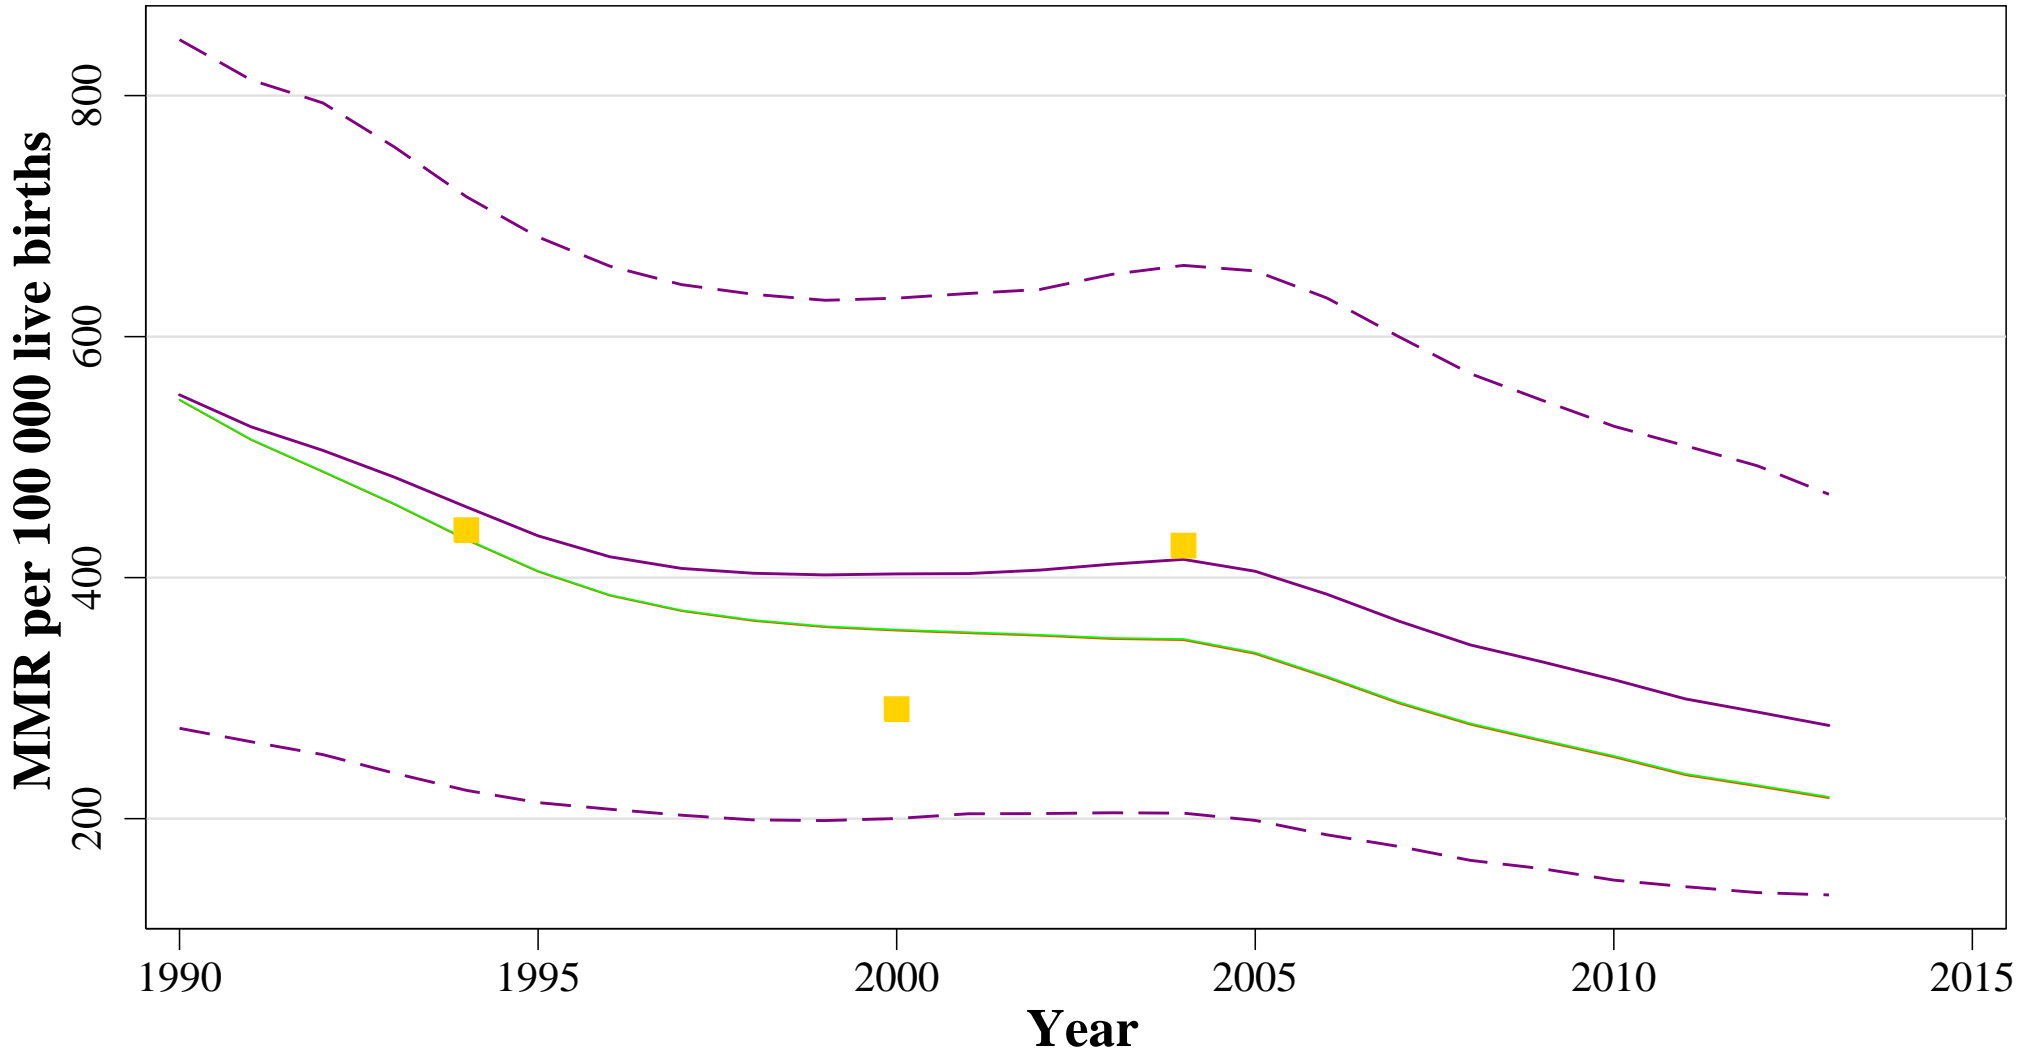

# Bolivia

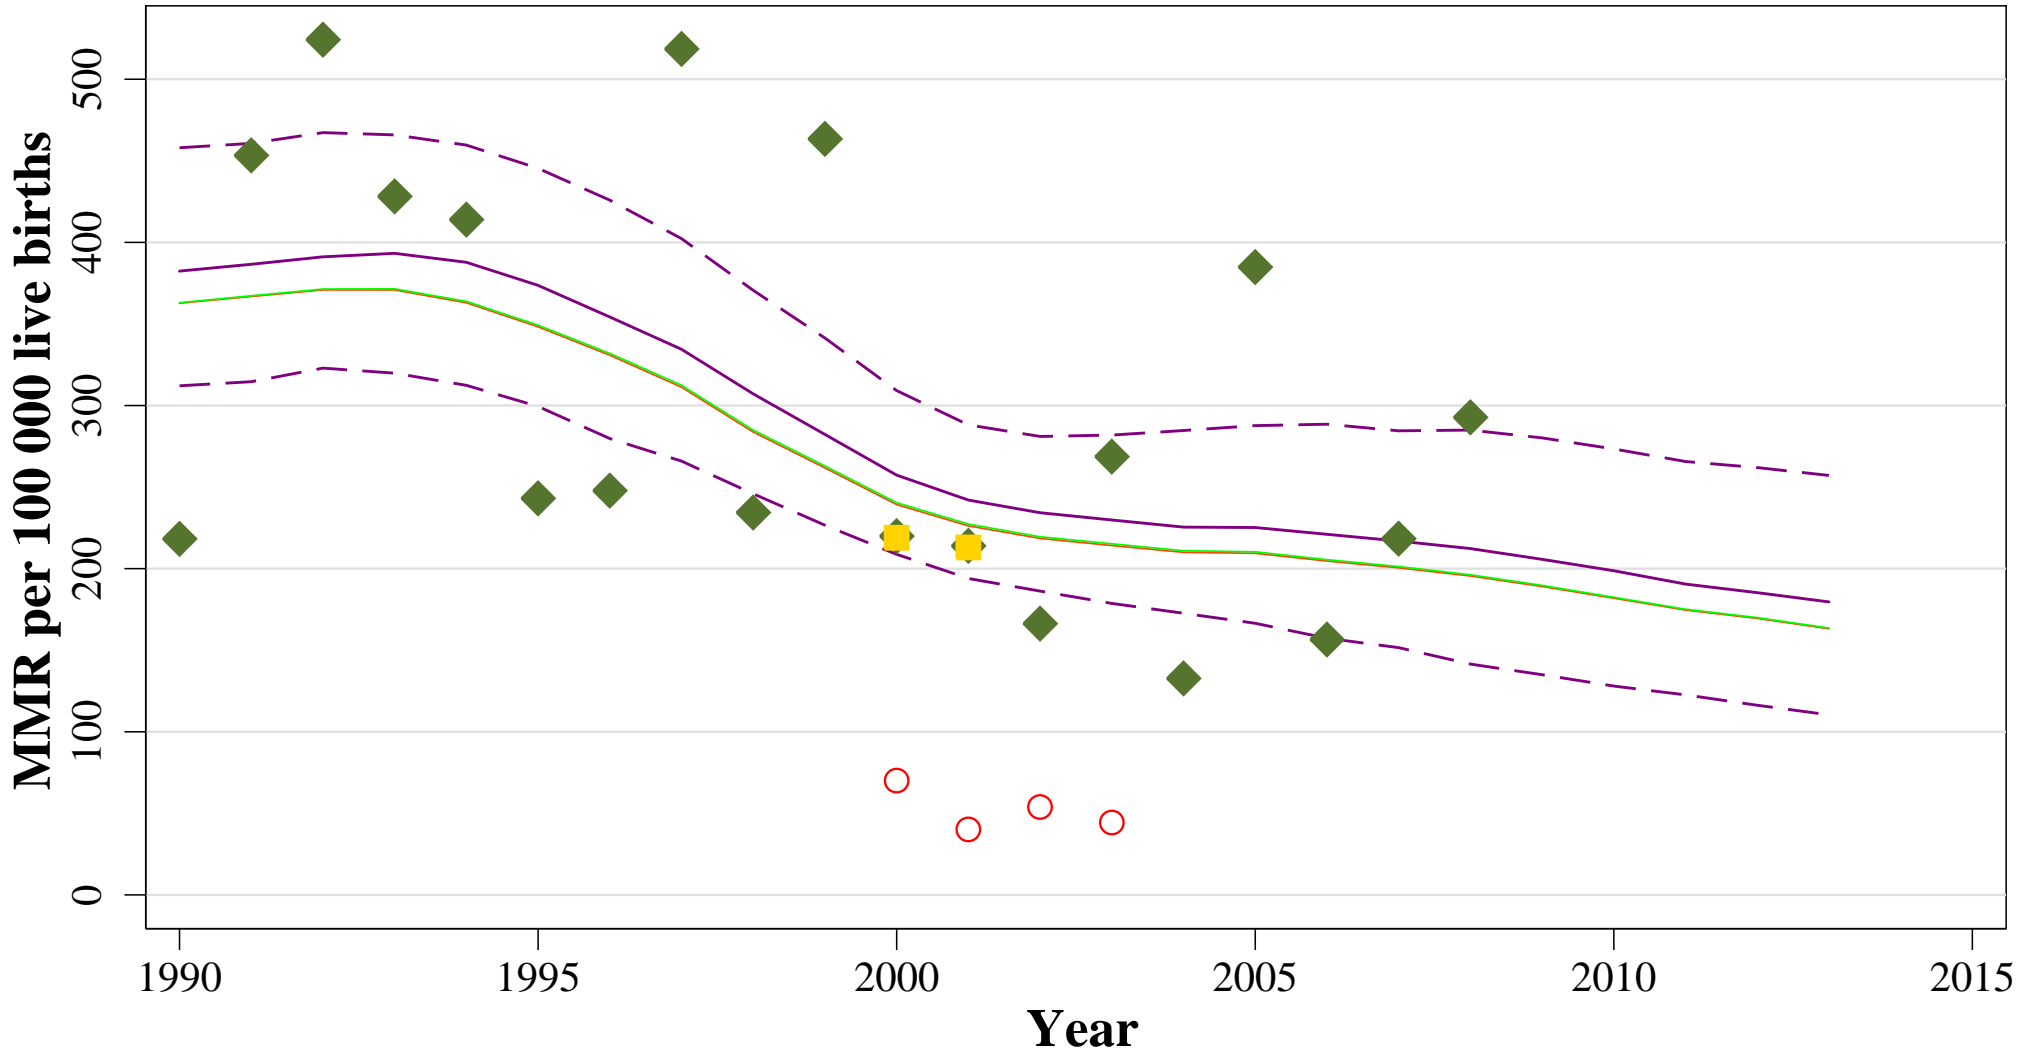

# Bosnia and Herzegovina

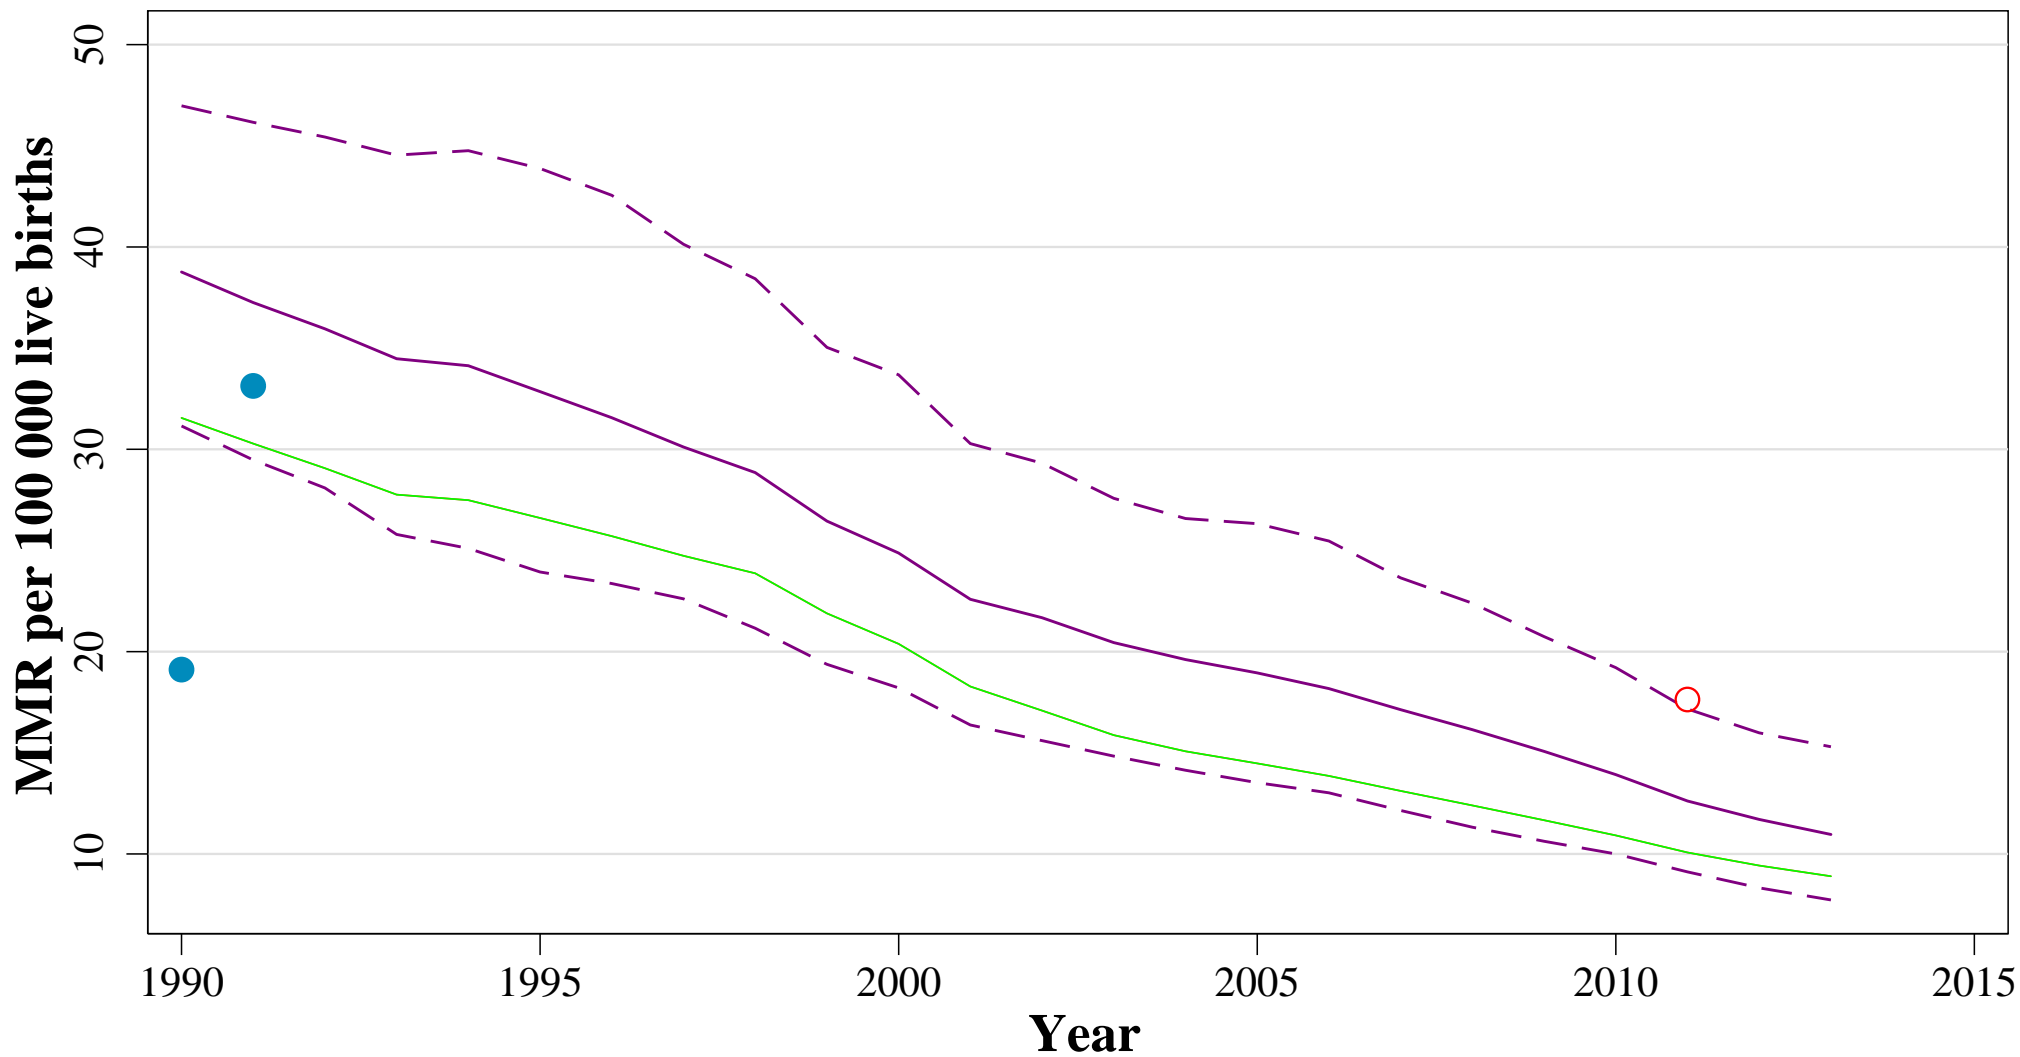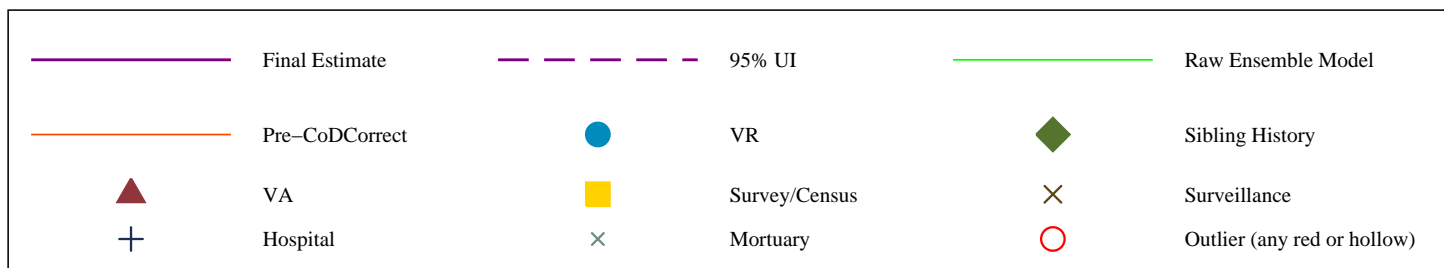



# Botswana

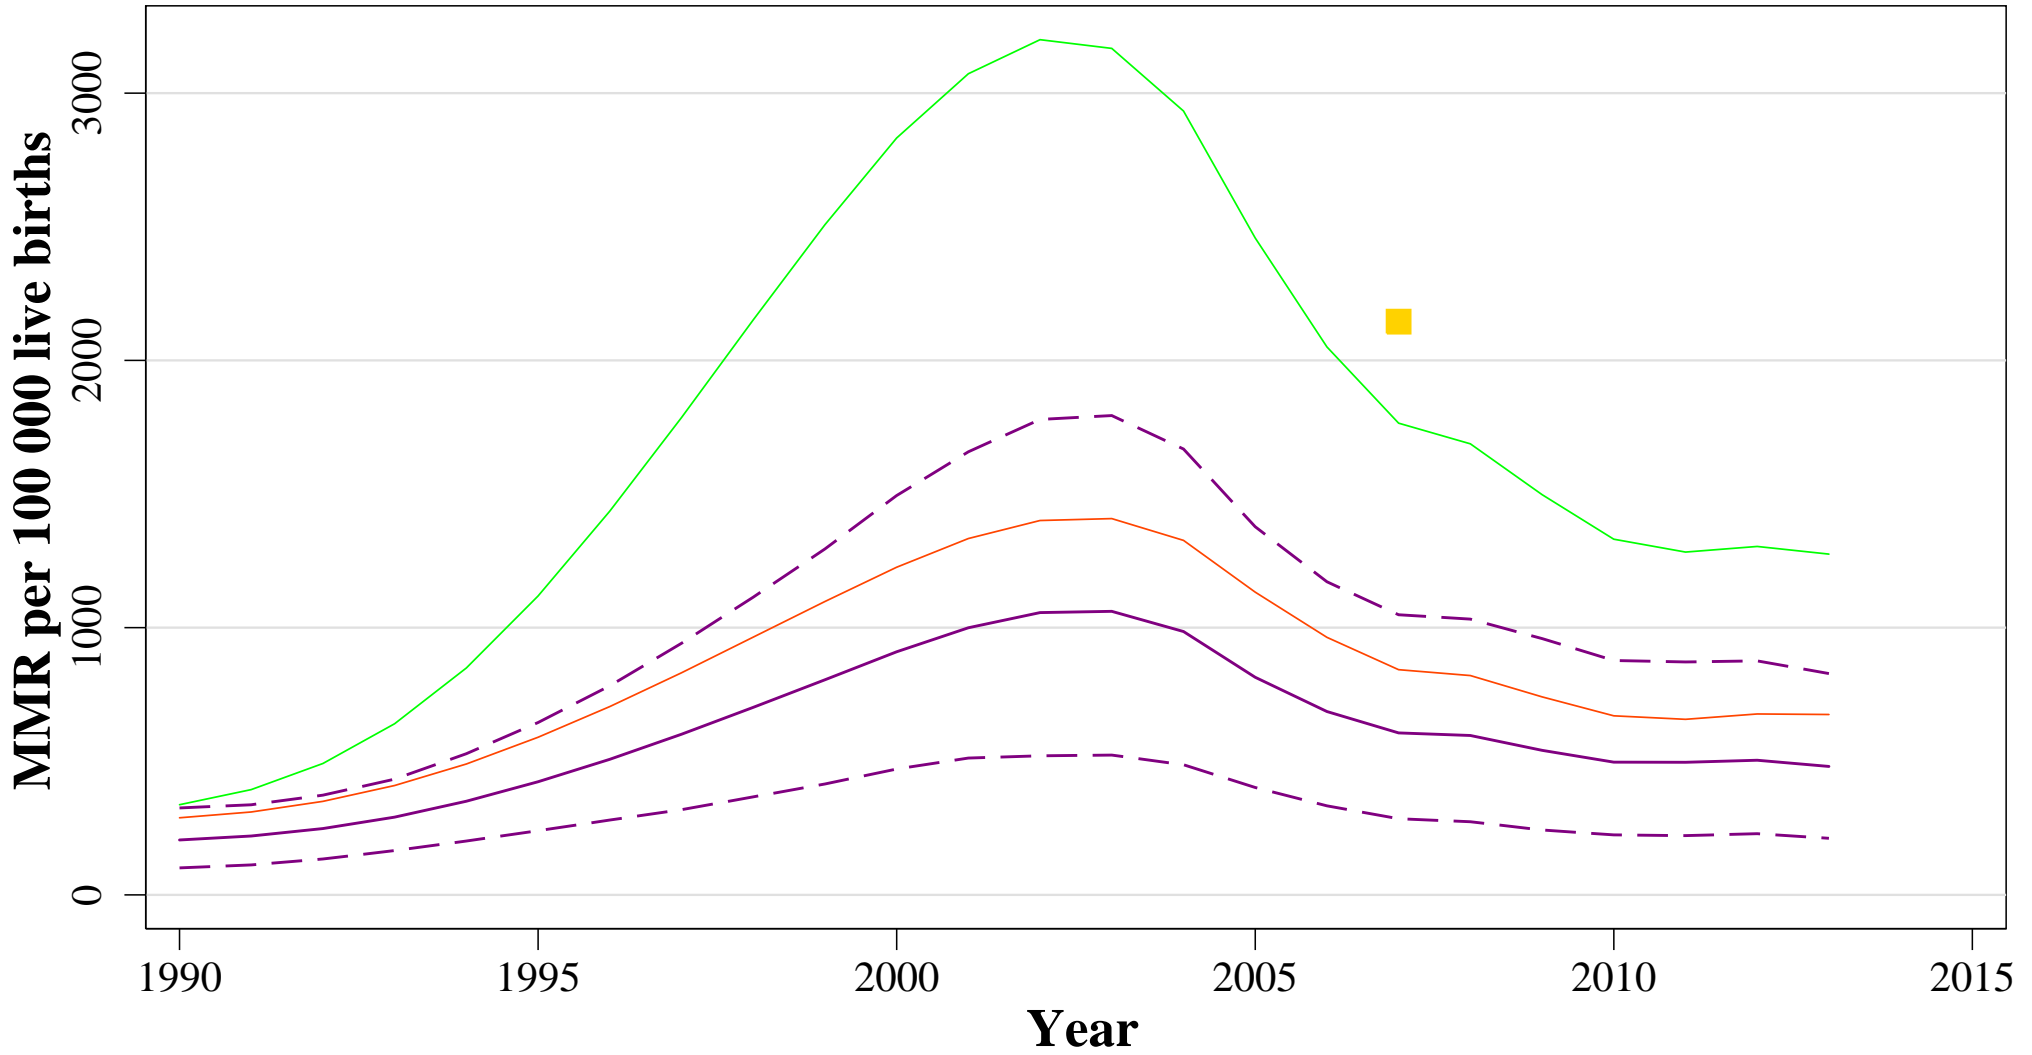

# Brazil

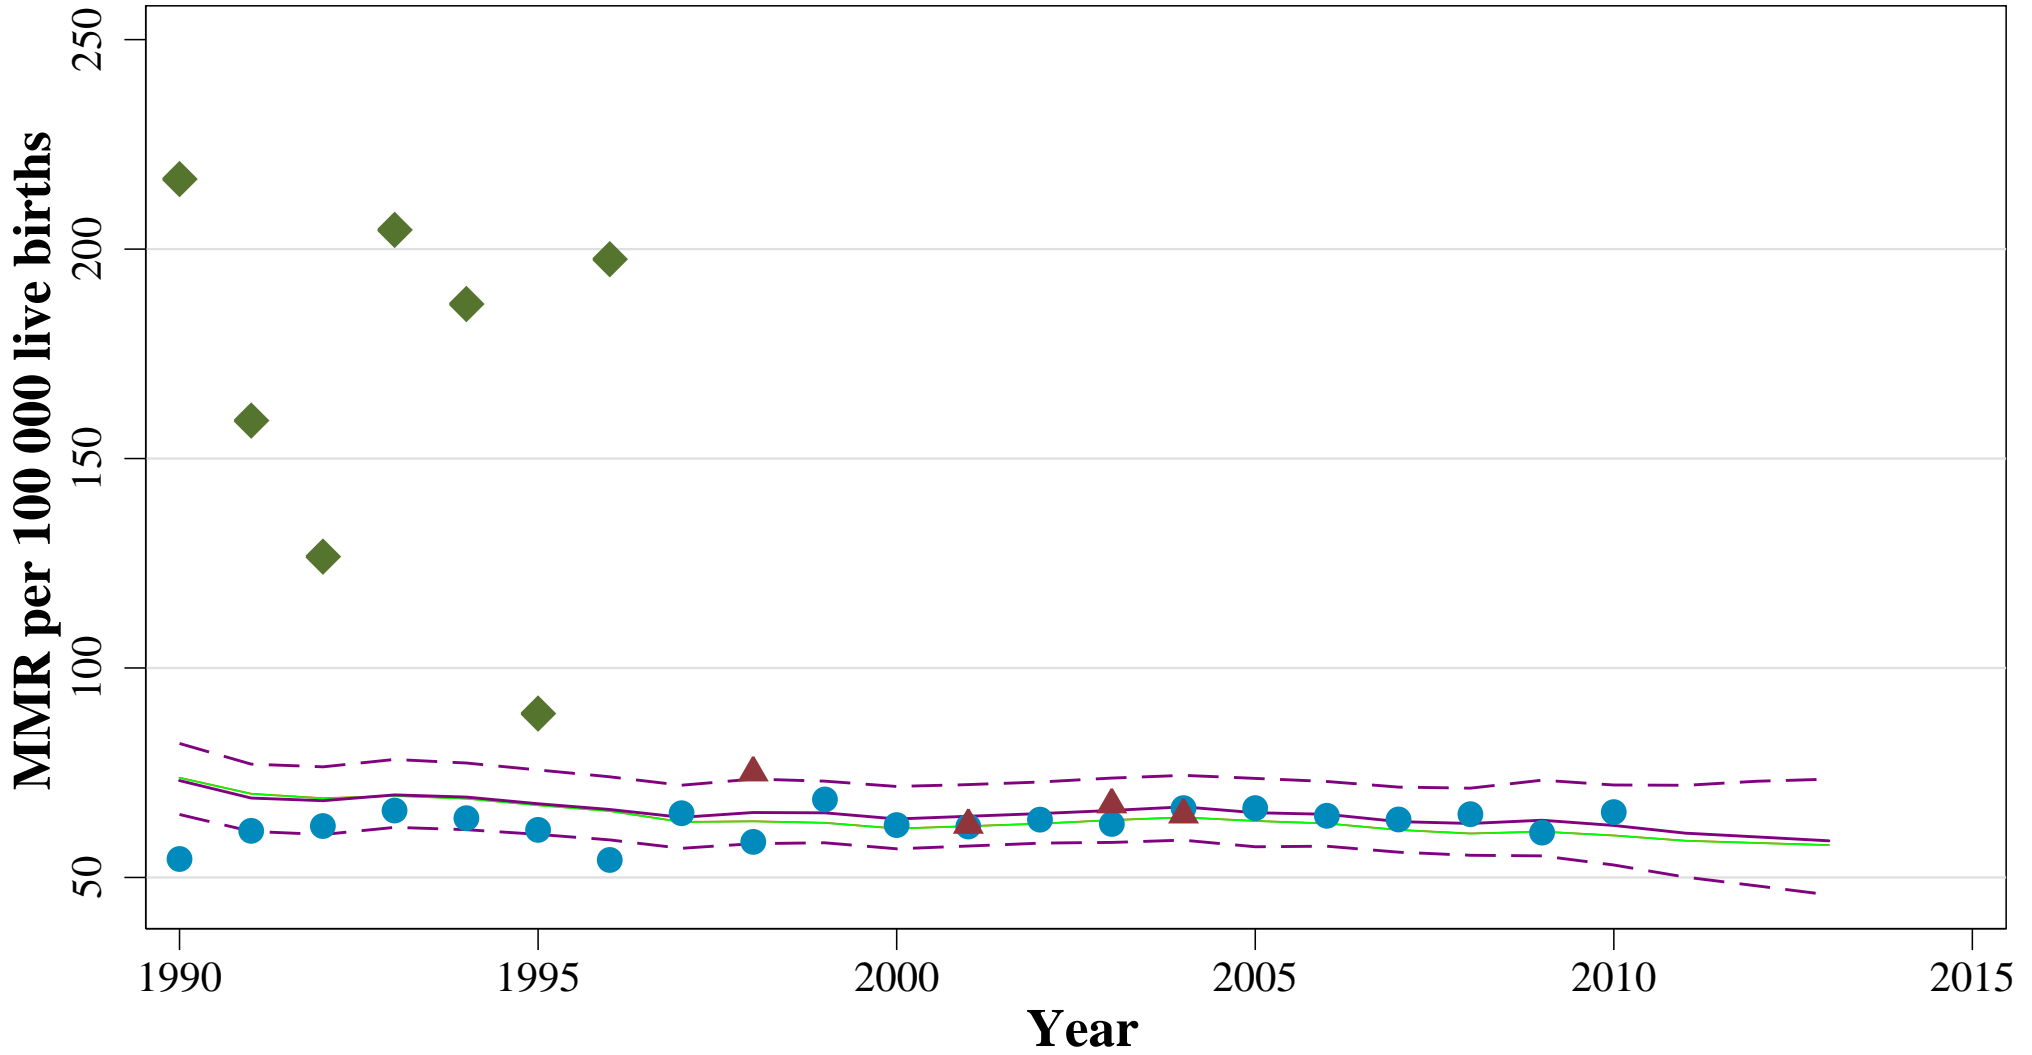

# Brunei

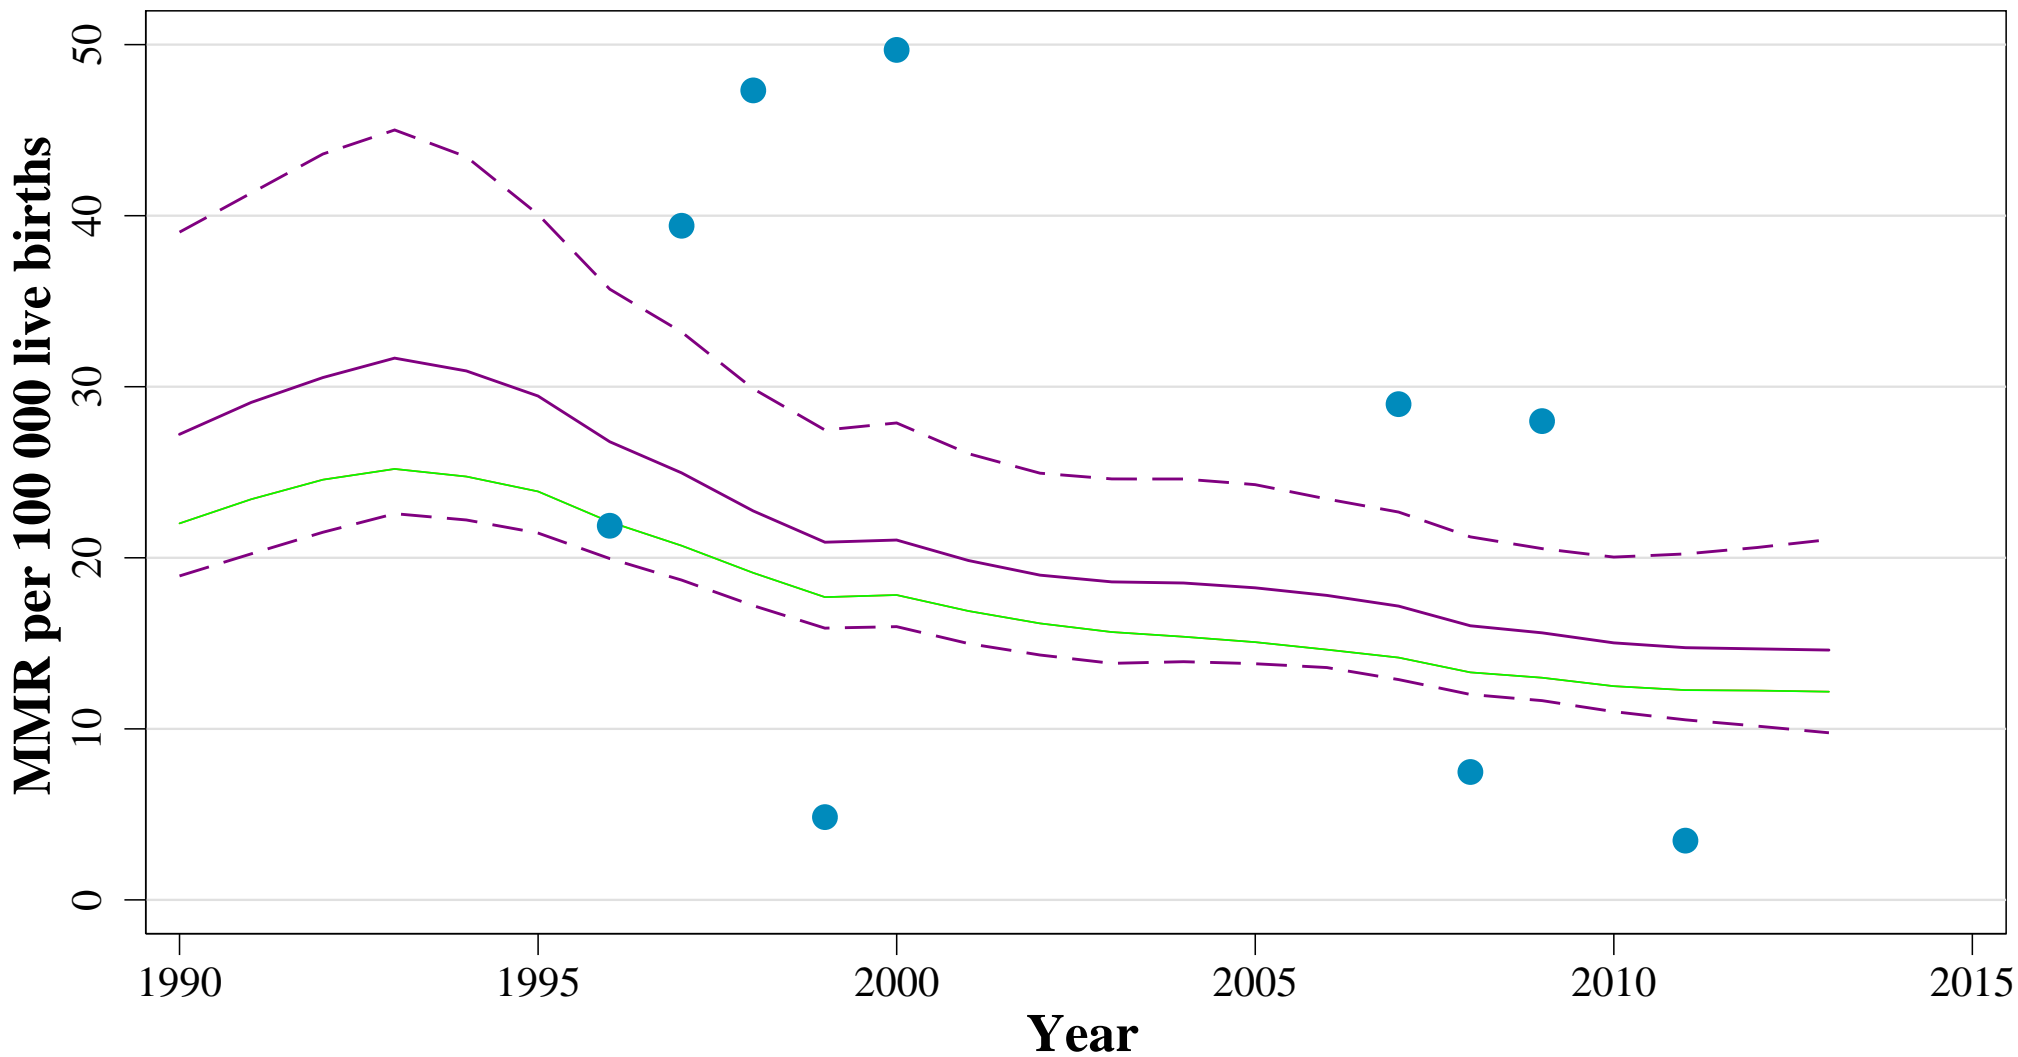

# Bulgaria

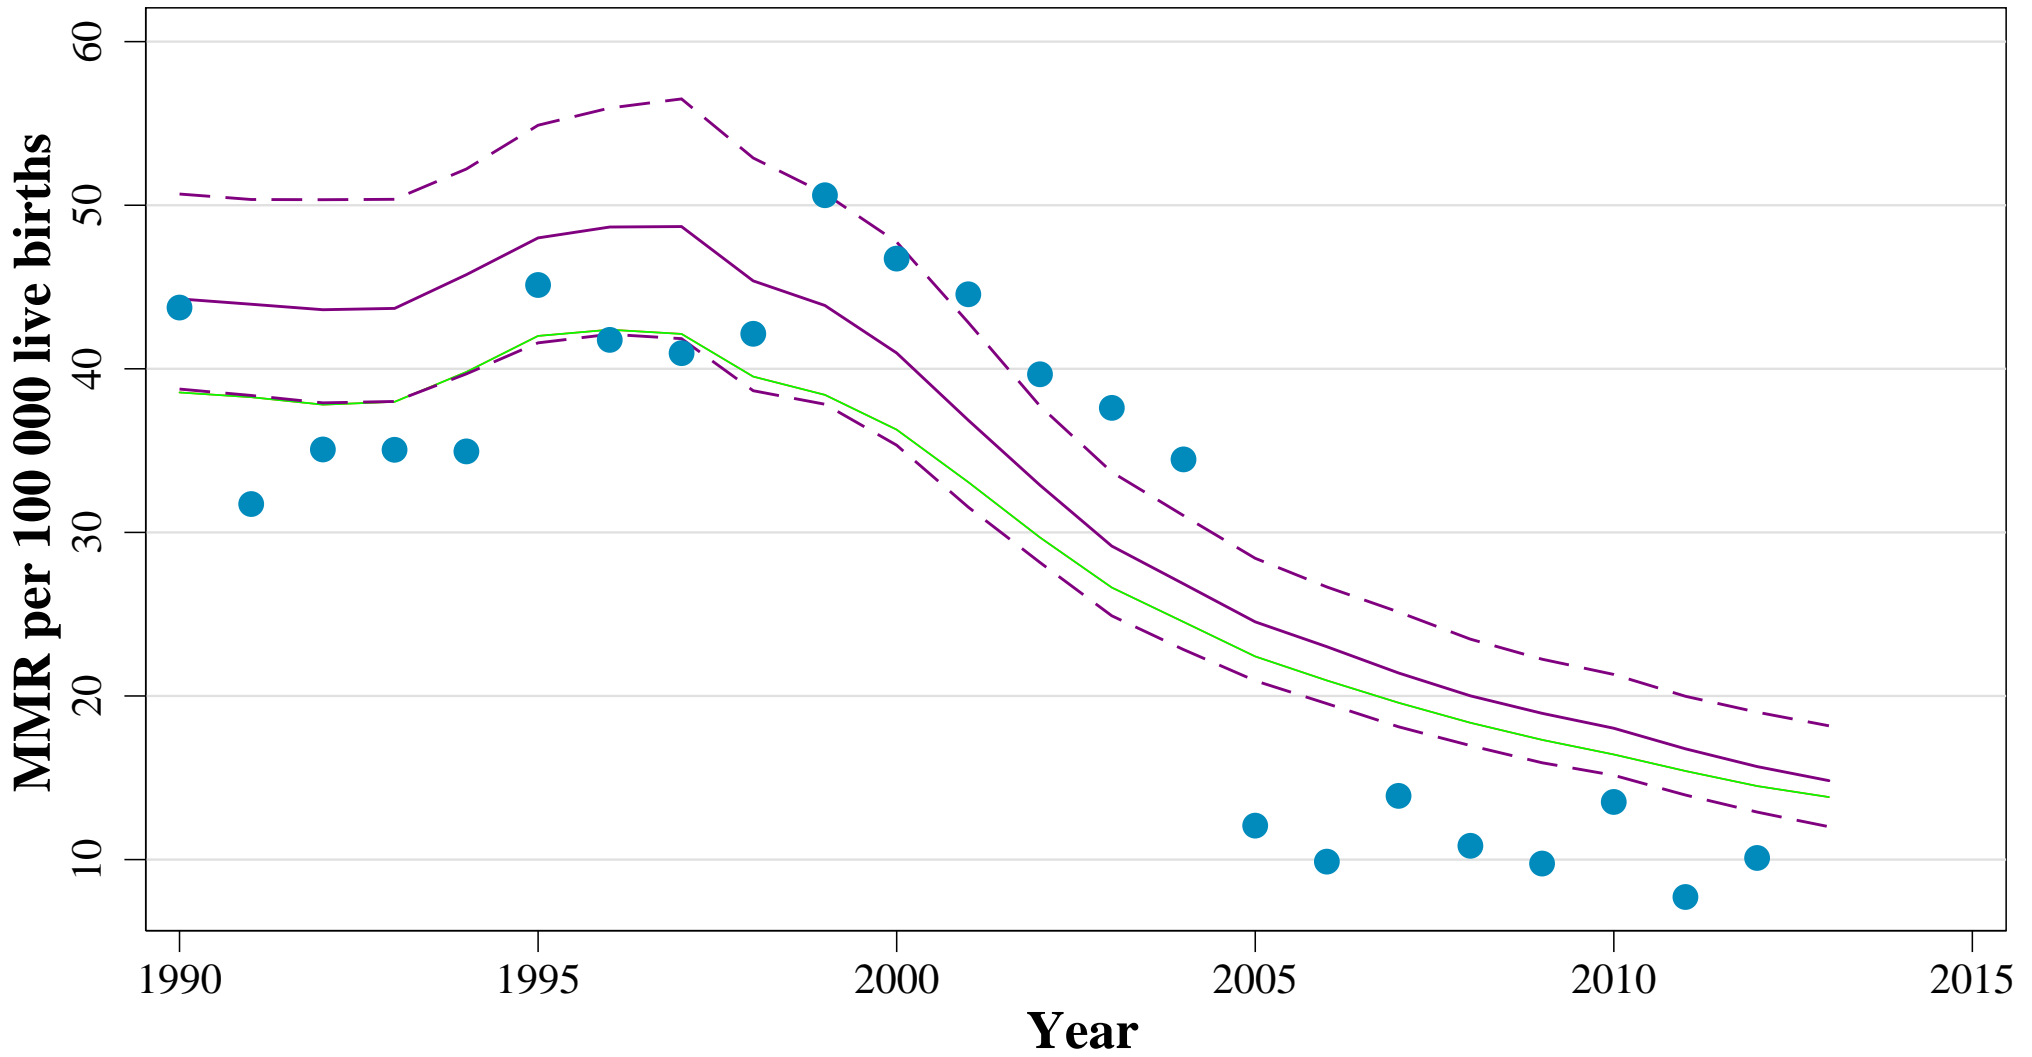

# Burkina Faso

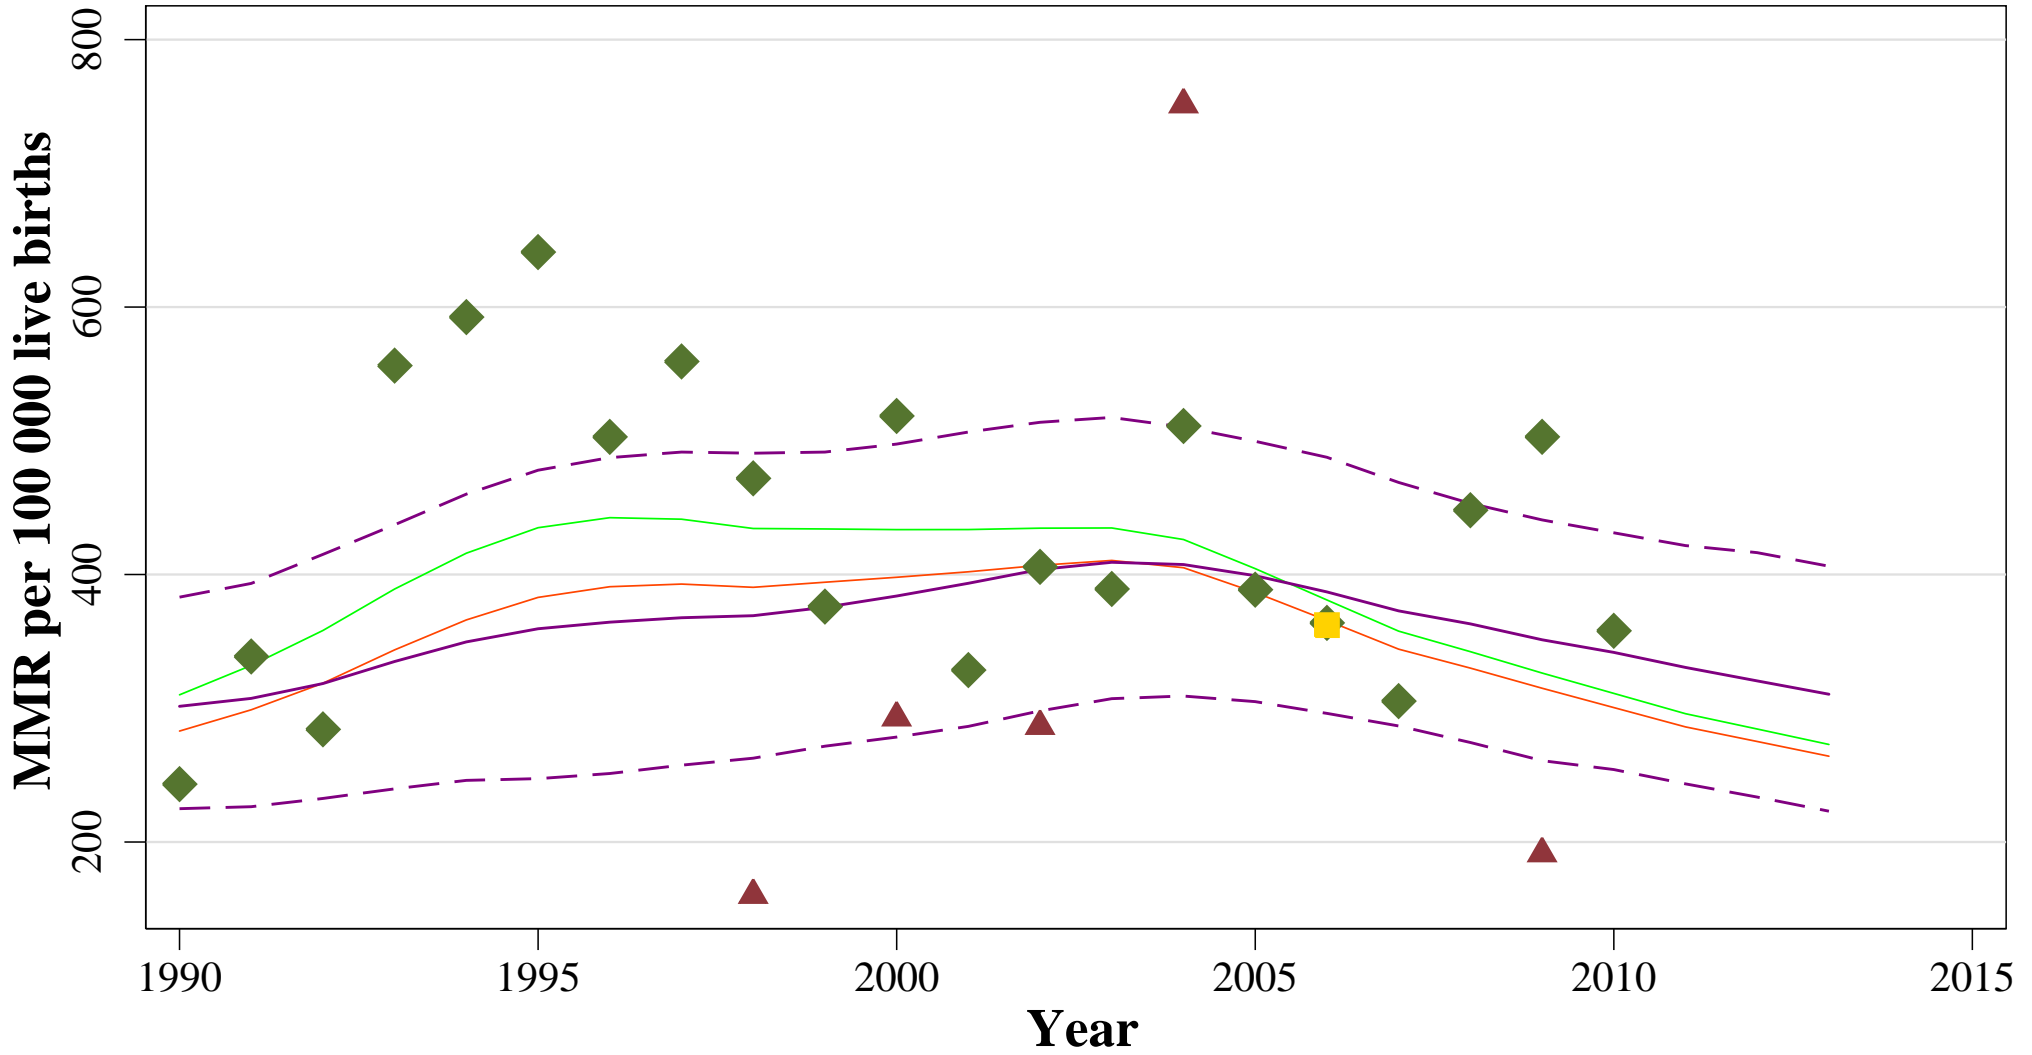

# Burundi

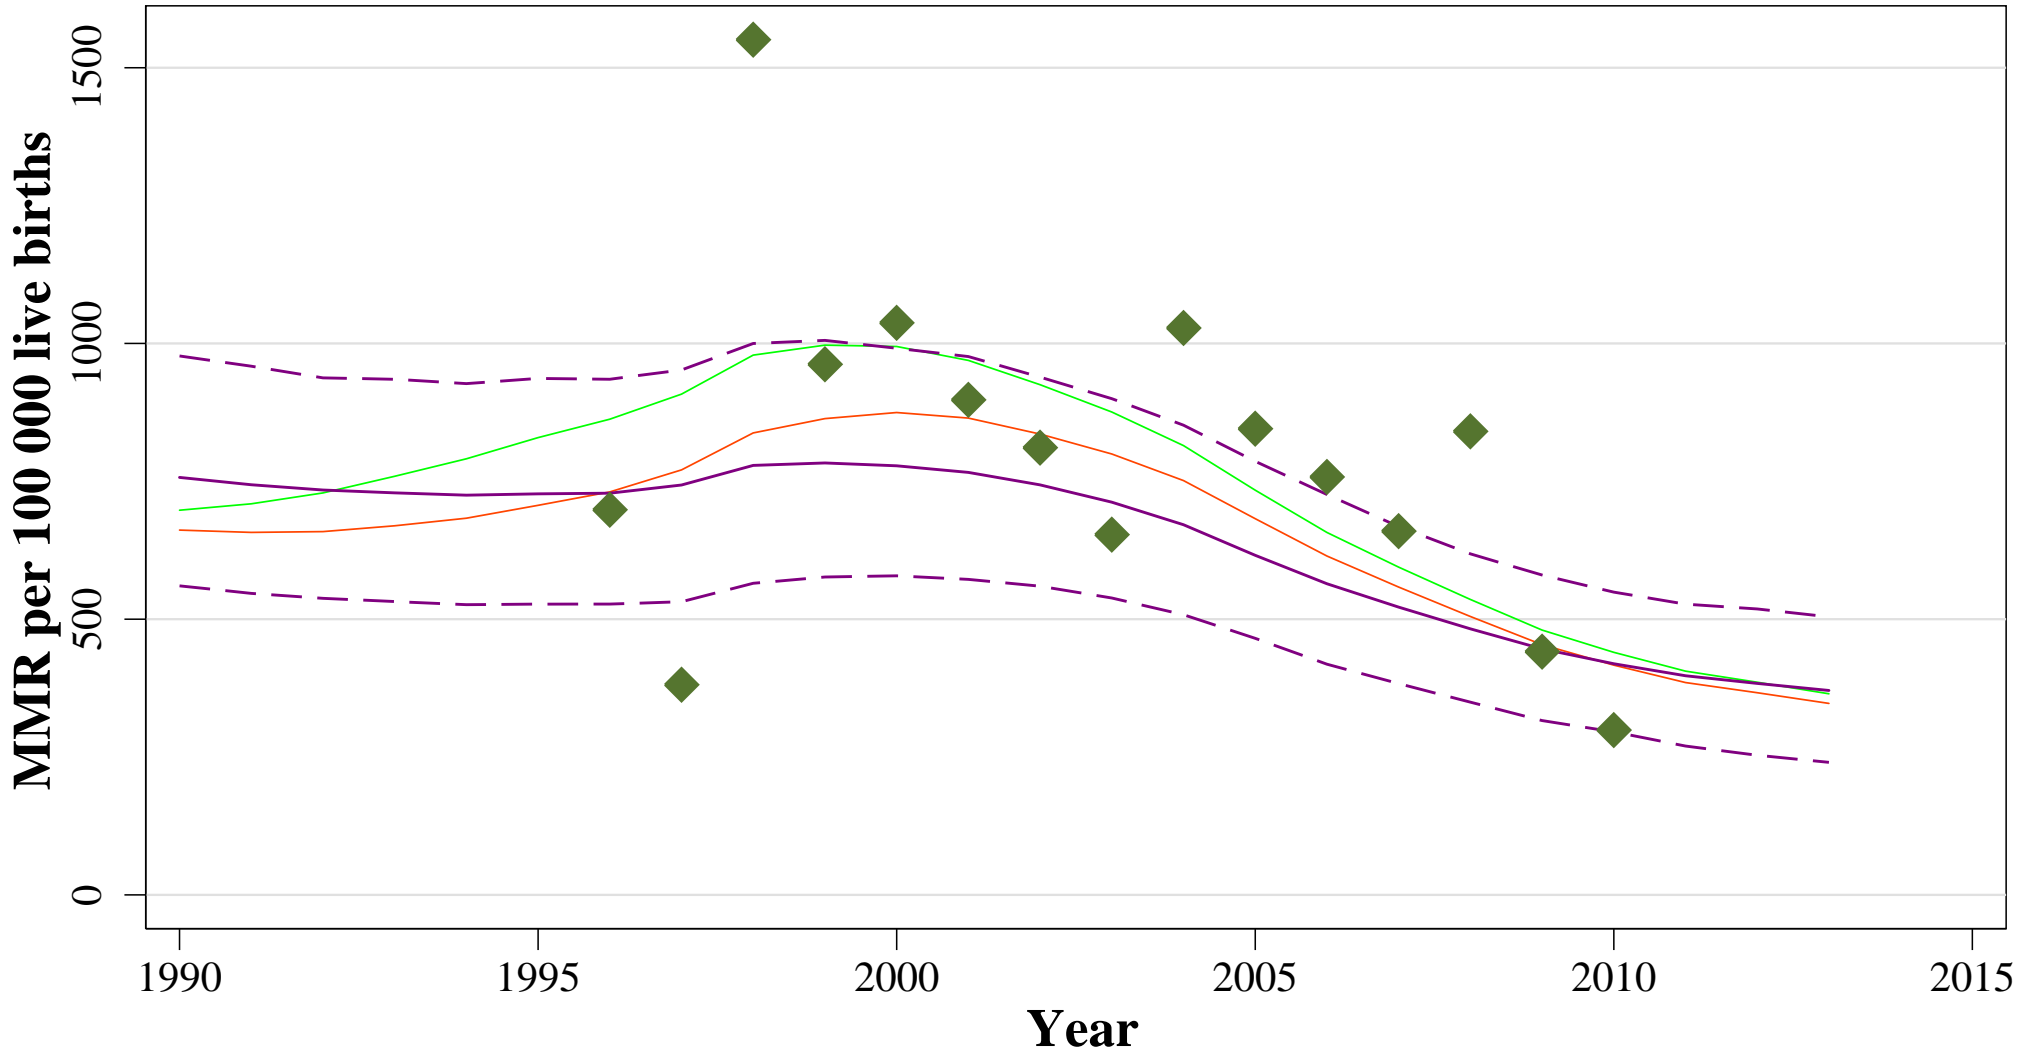

# Cambodia

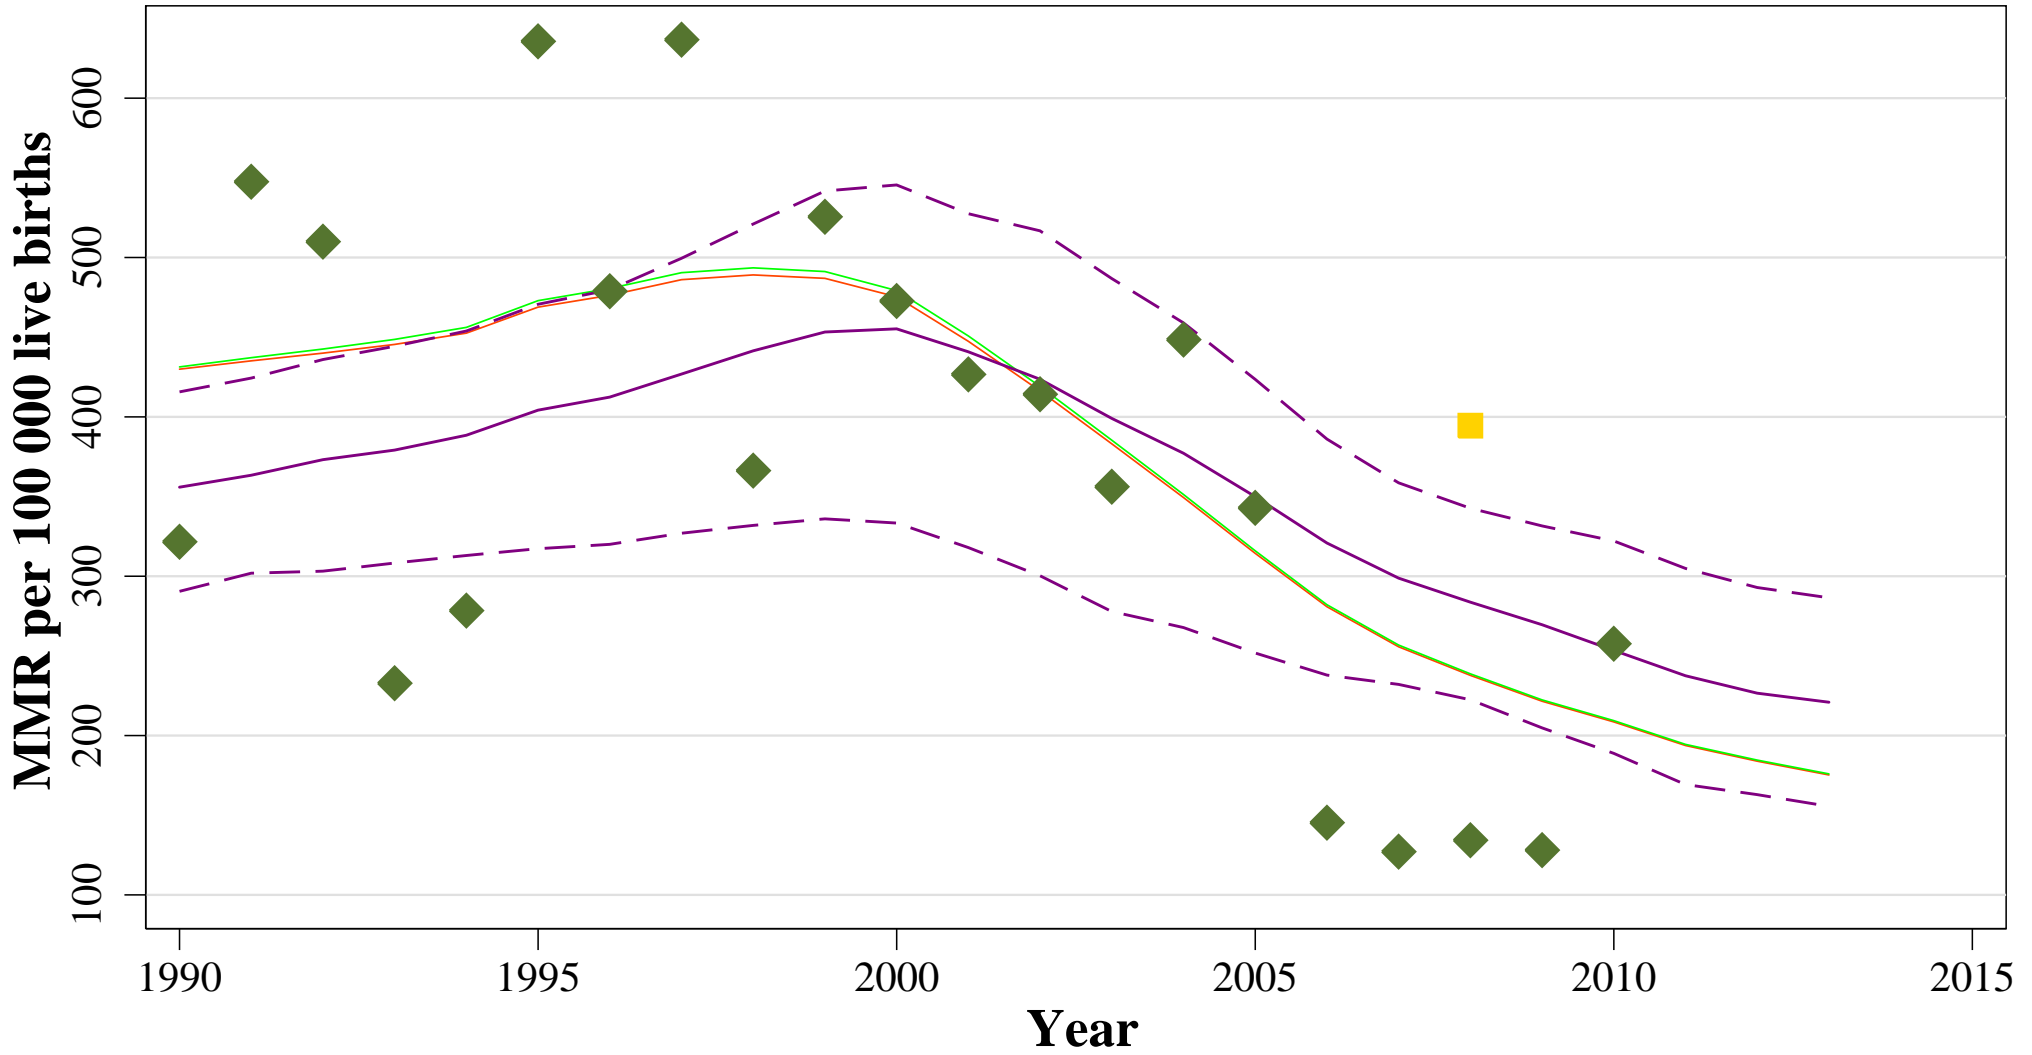

# Cameroon

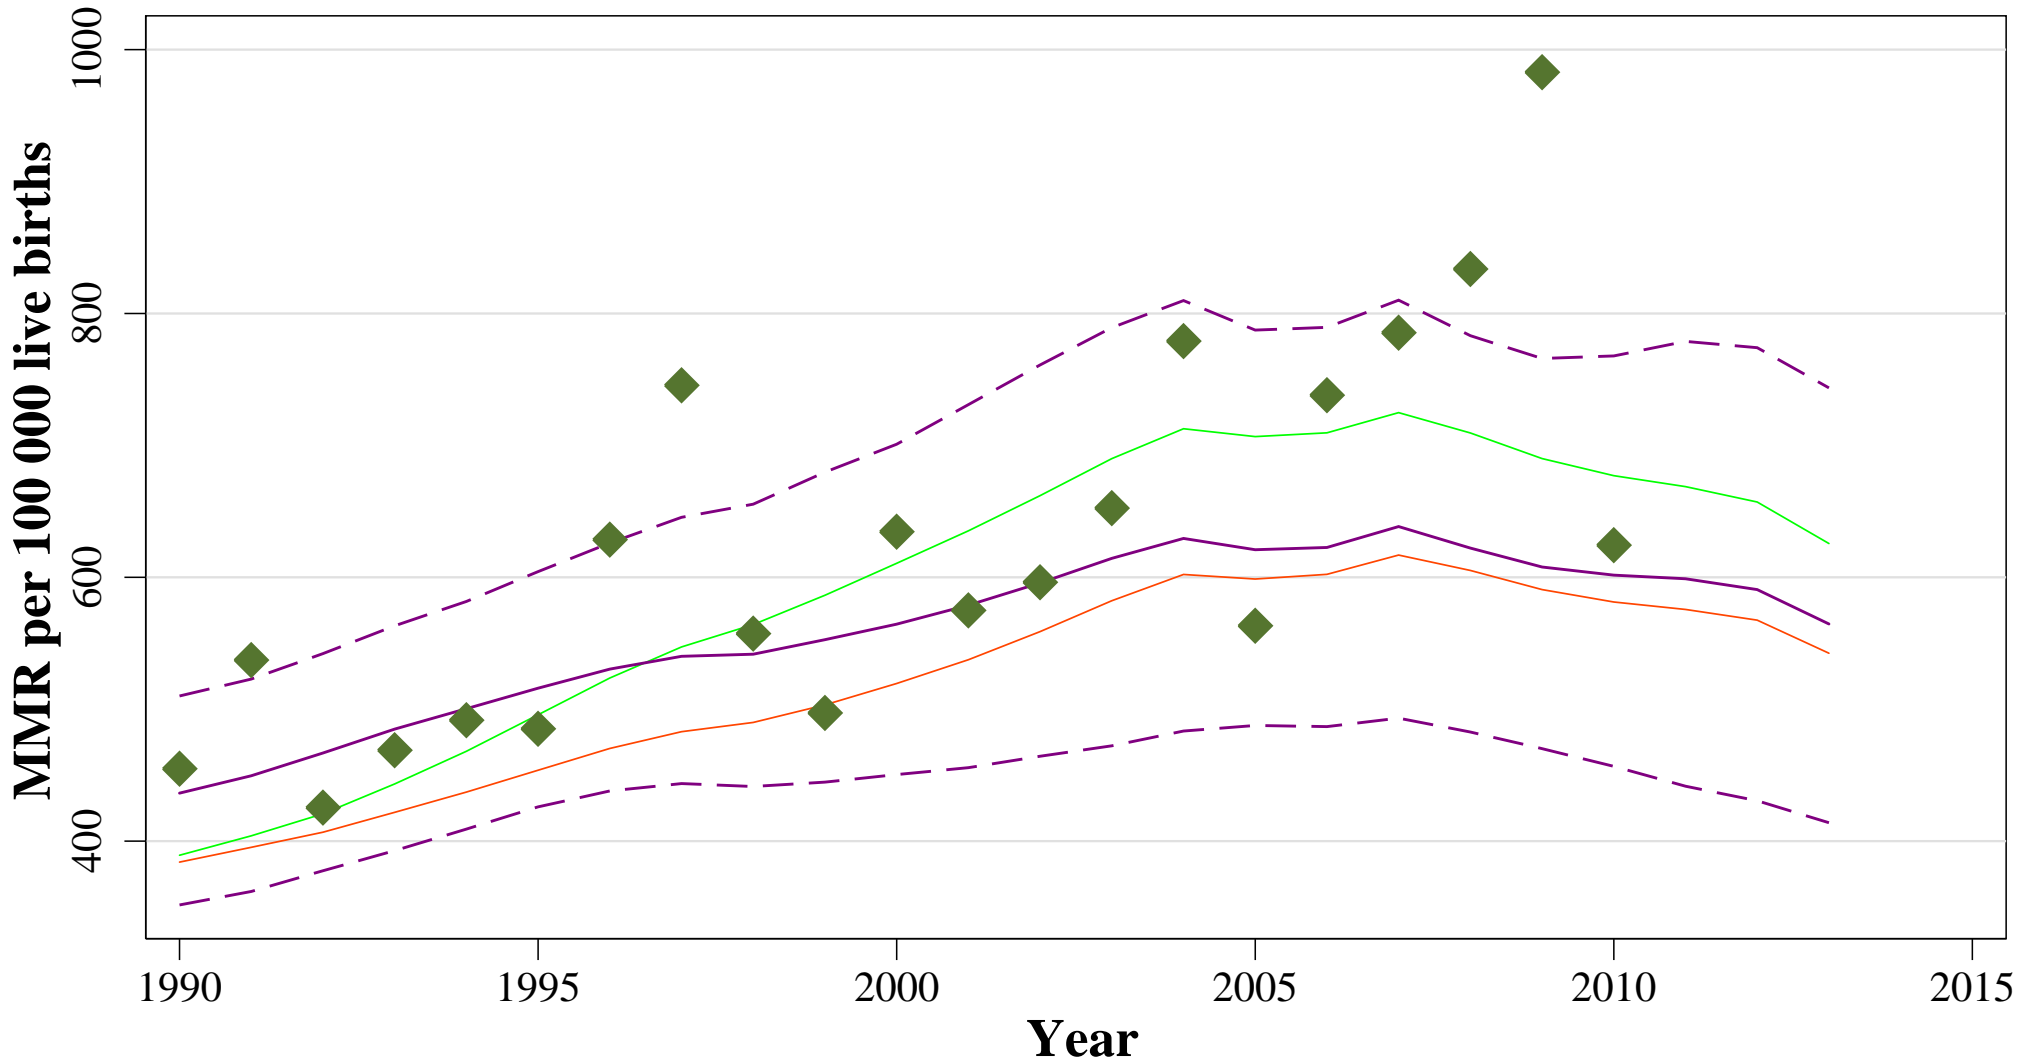



# Canada

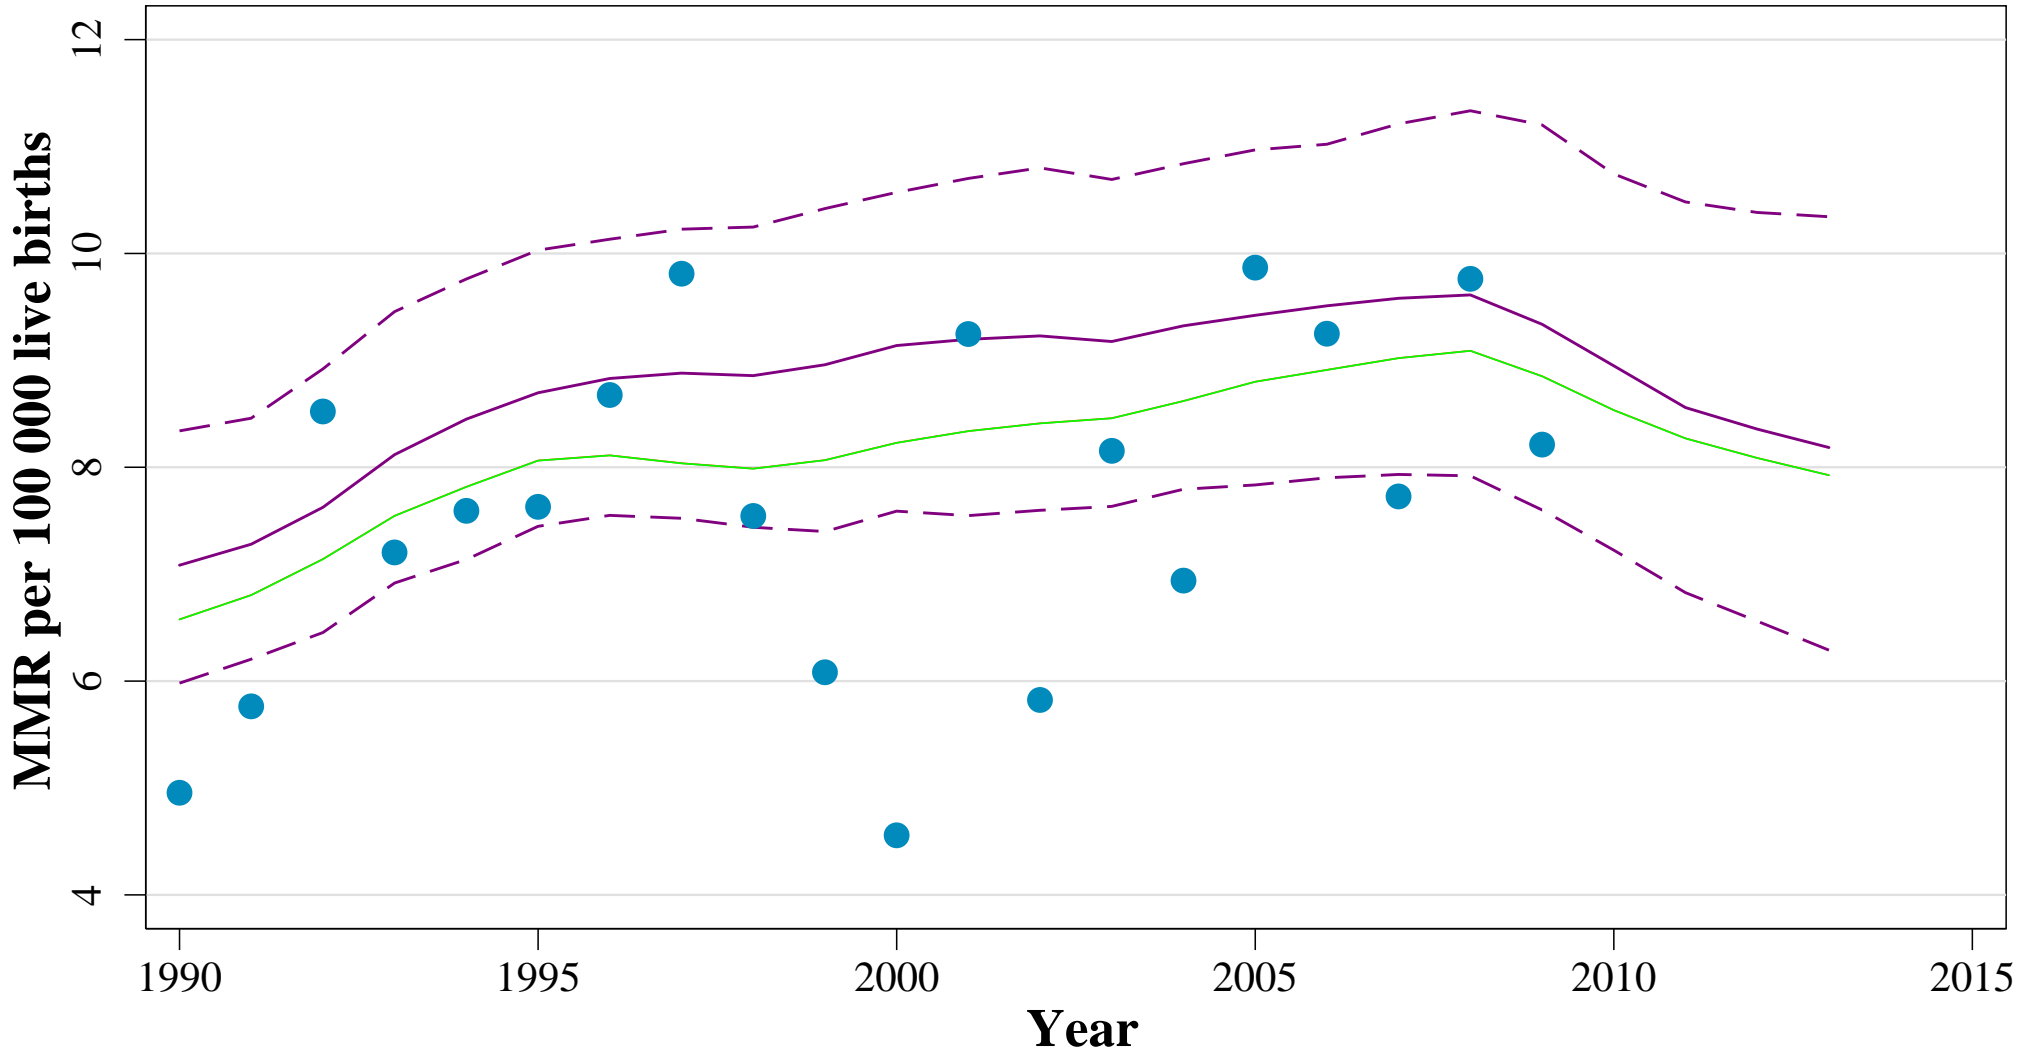

# Cape Verde

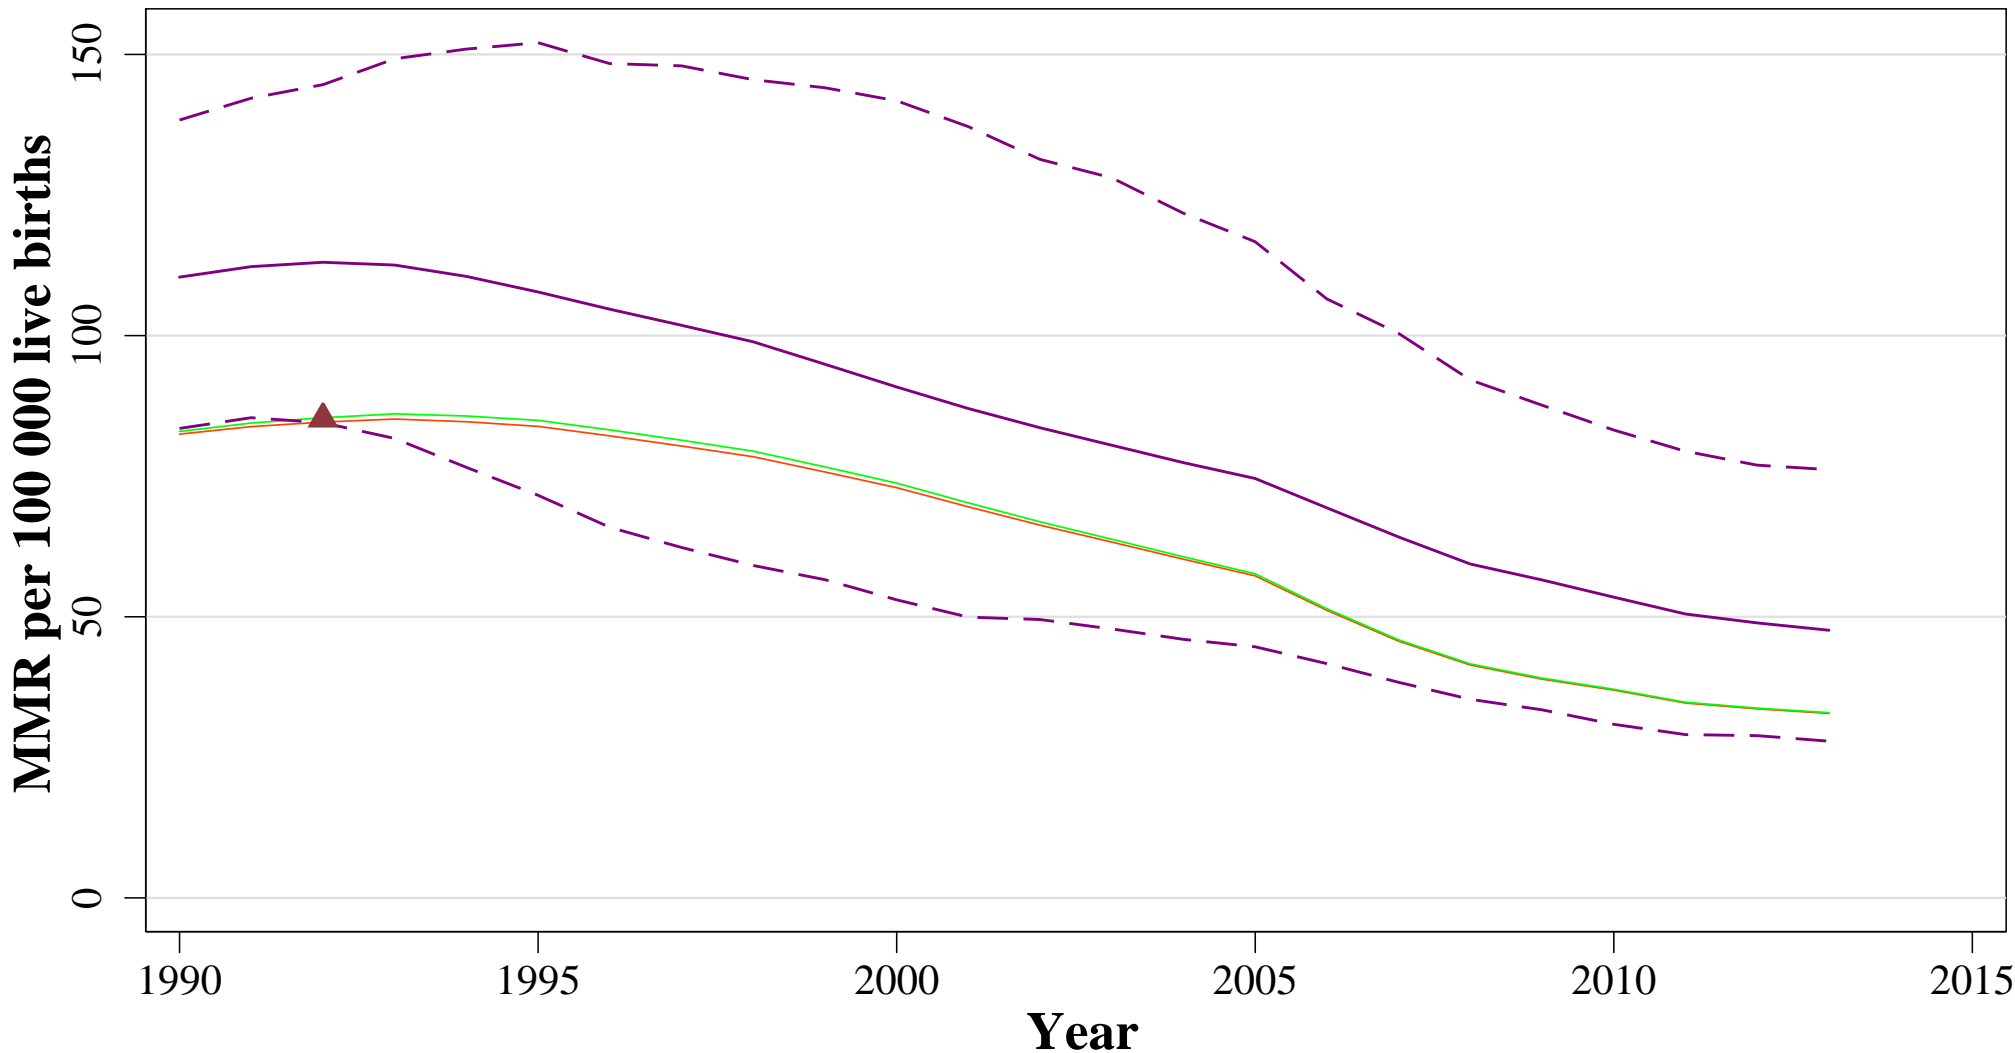

# Central African Republic

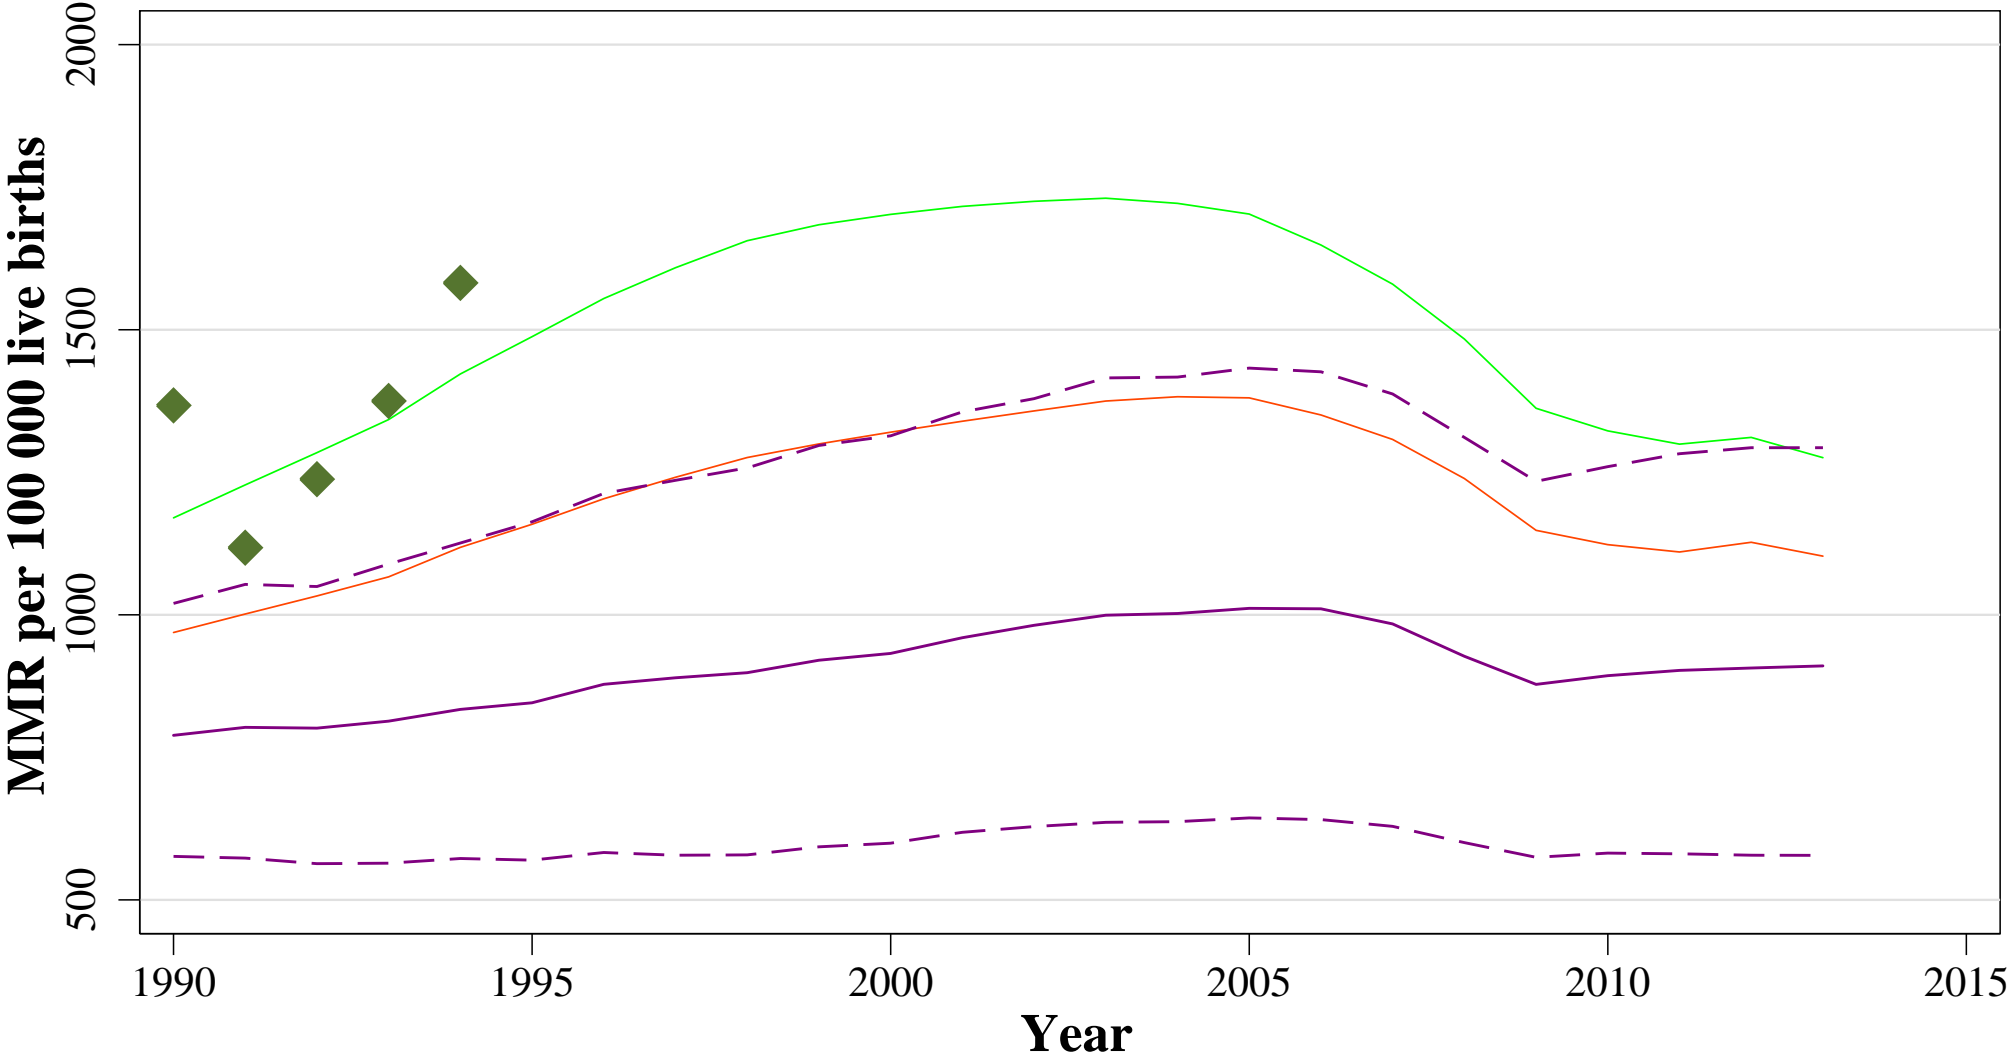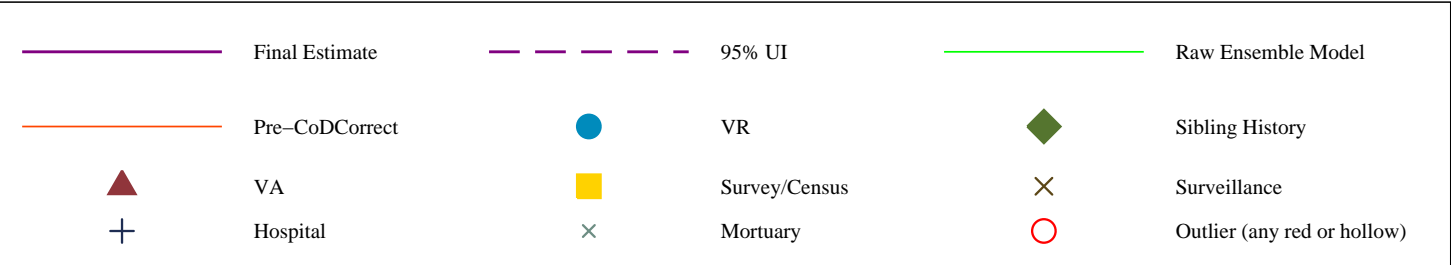

# Chad

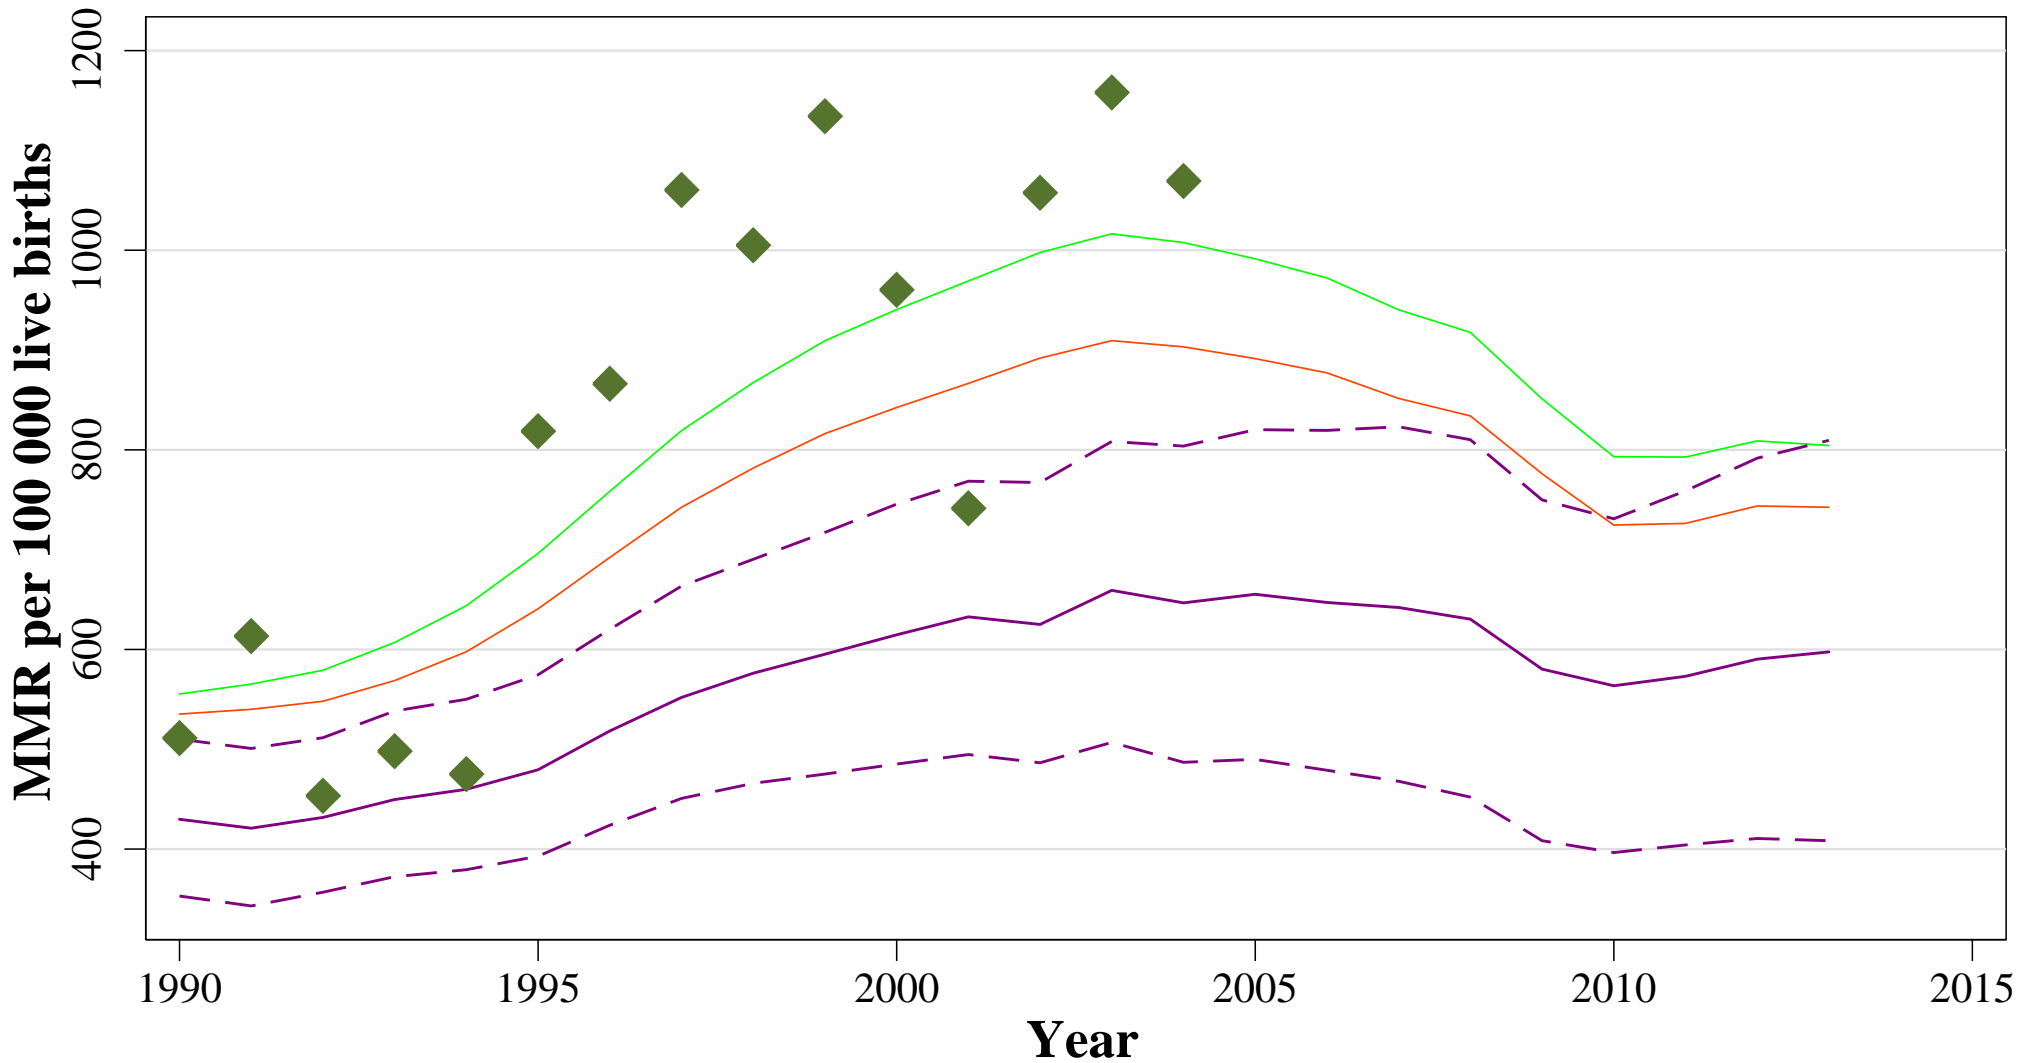

# Chile

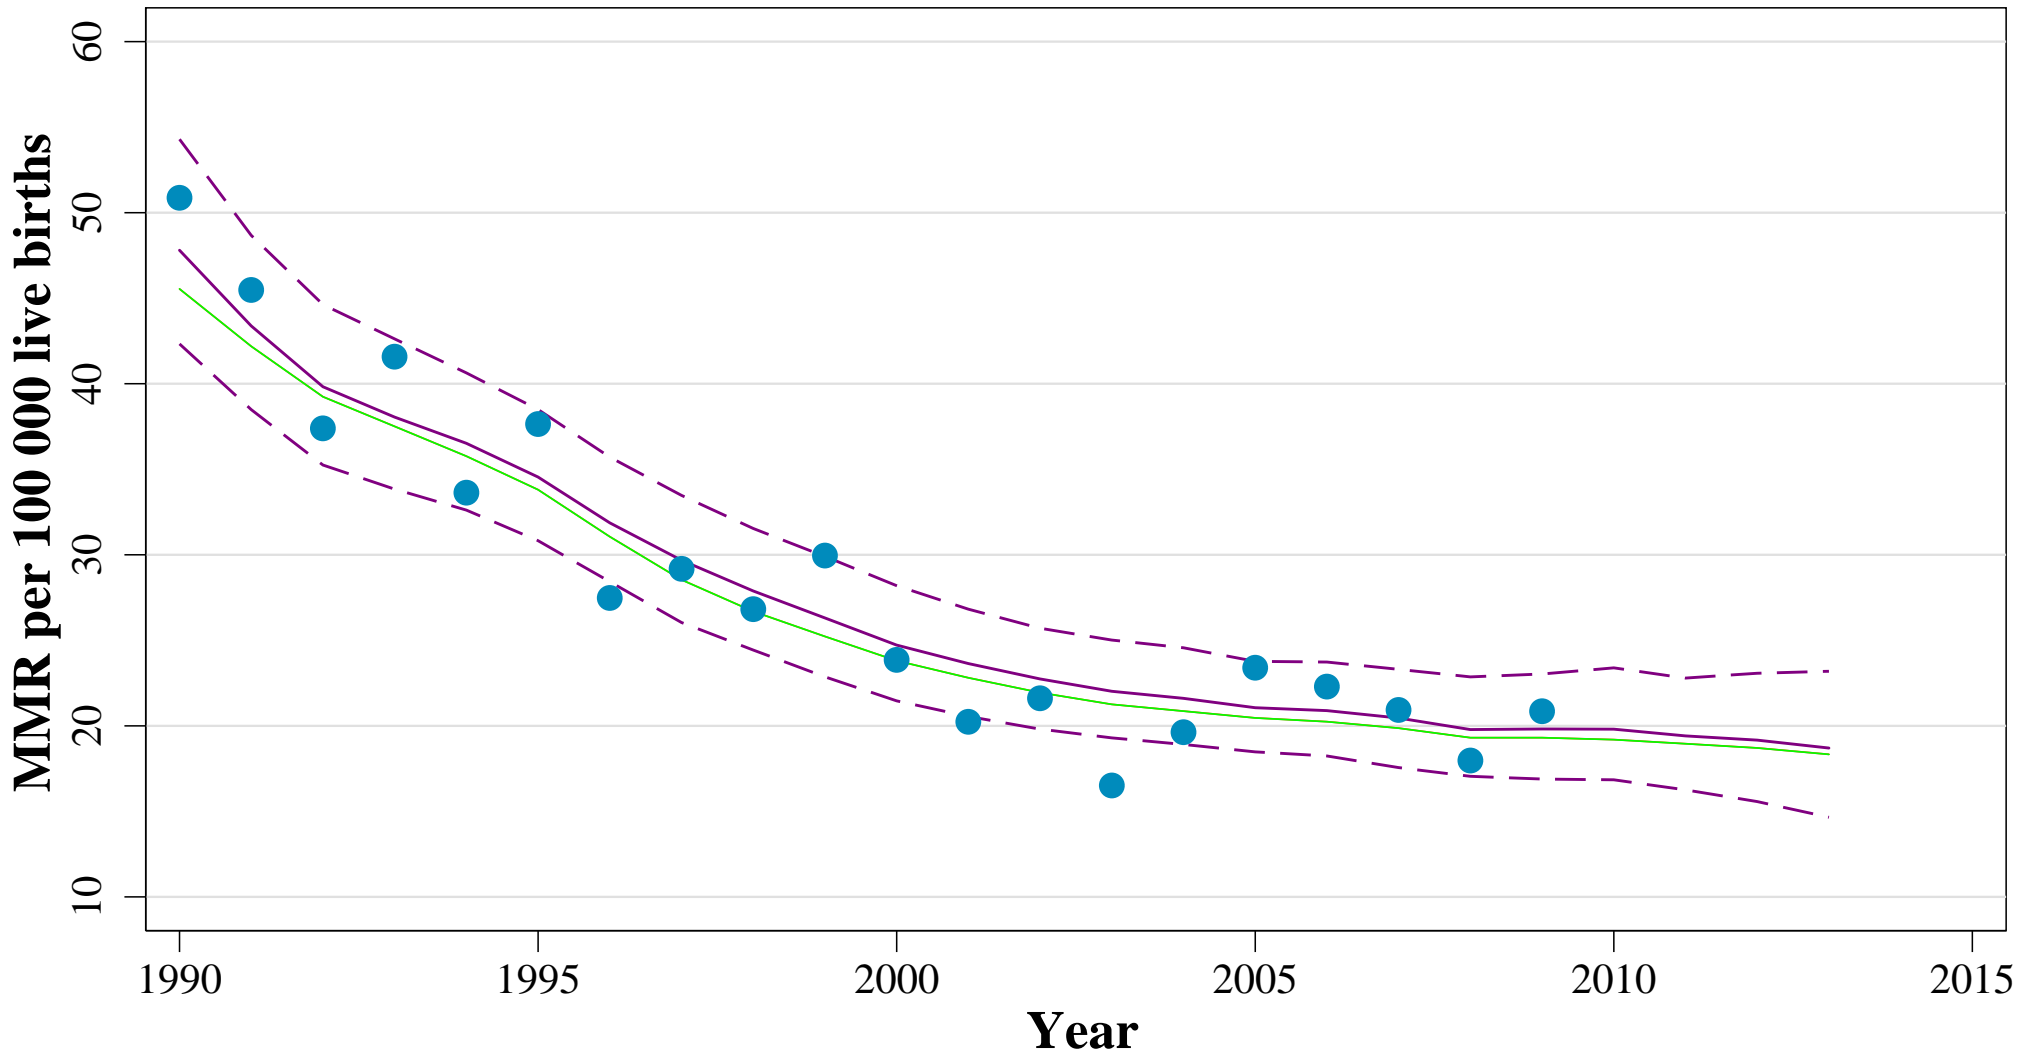

# China

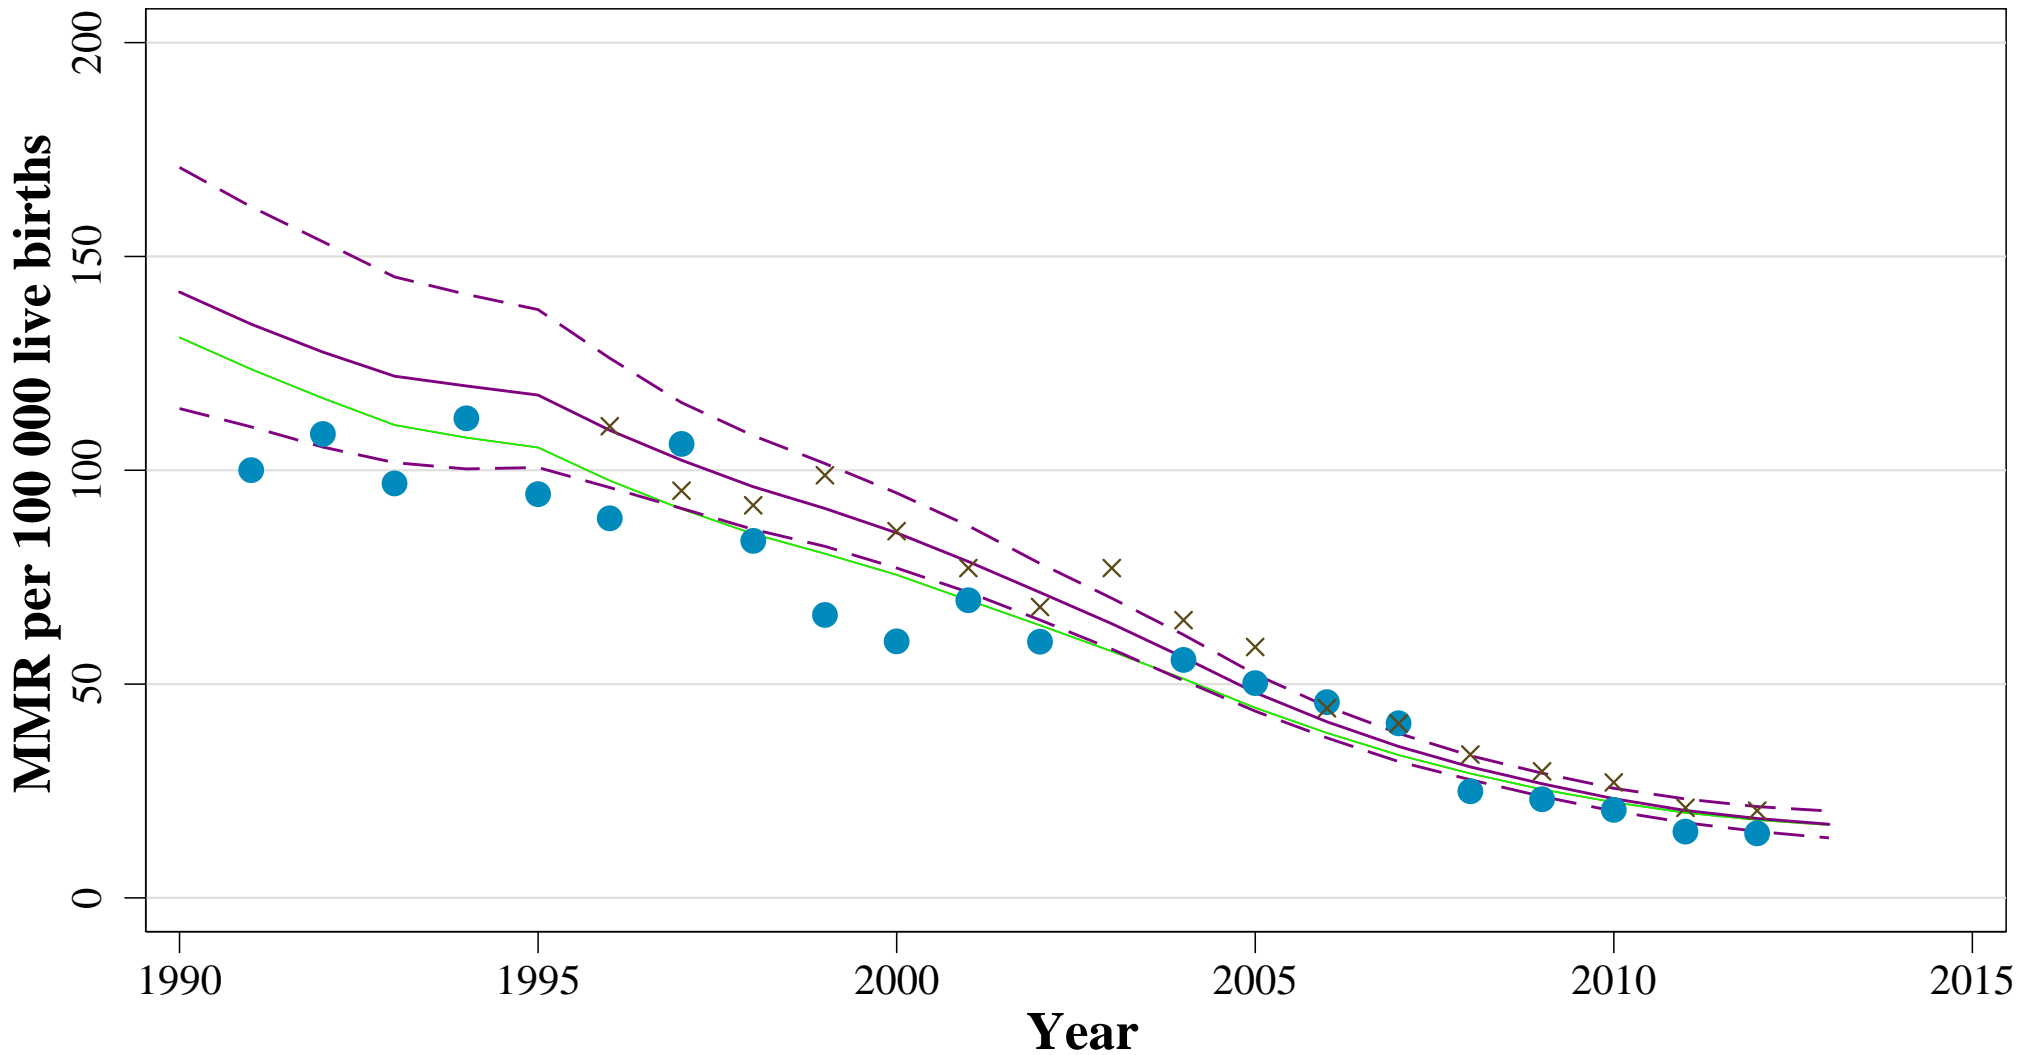

# Colombia

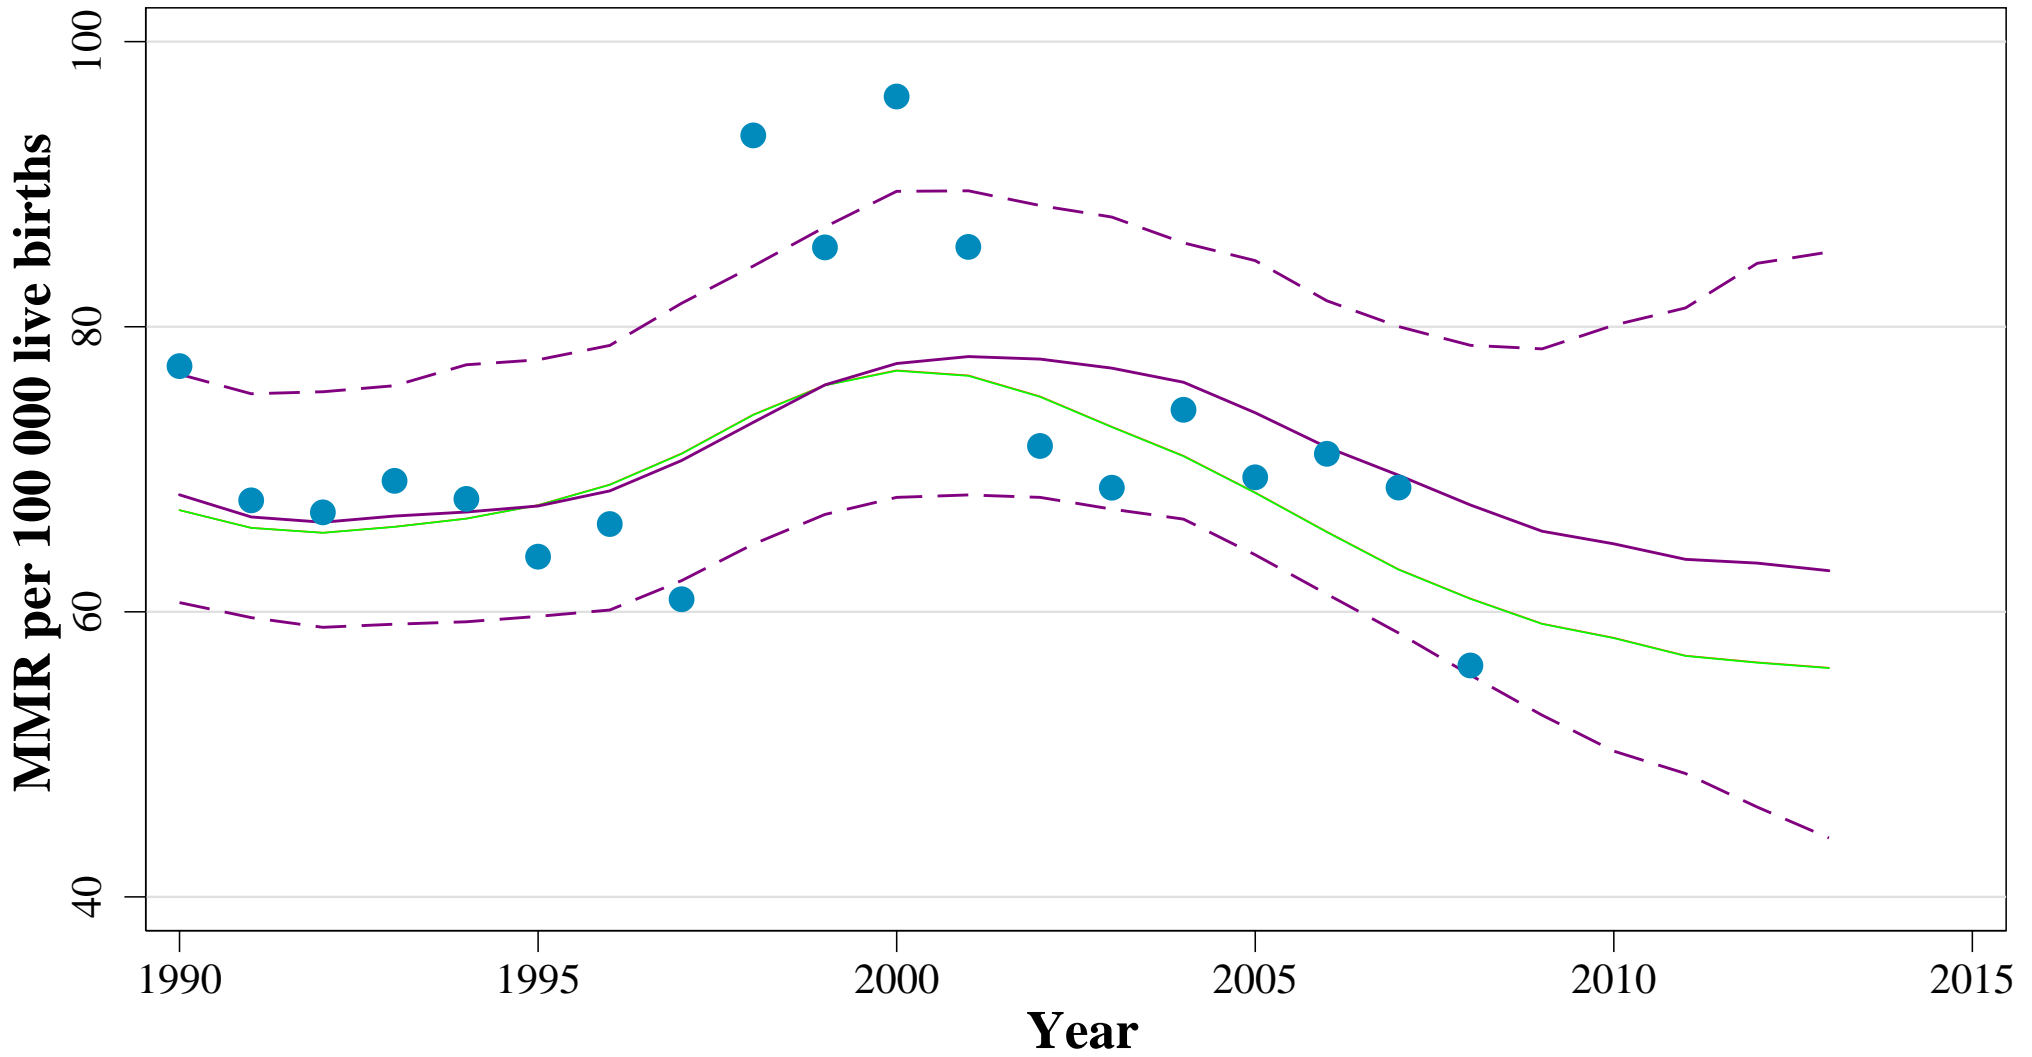

# Congo

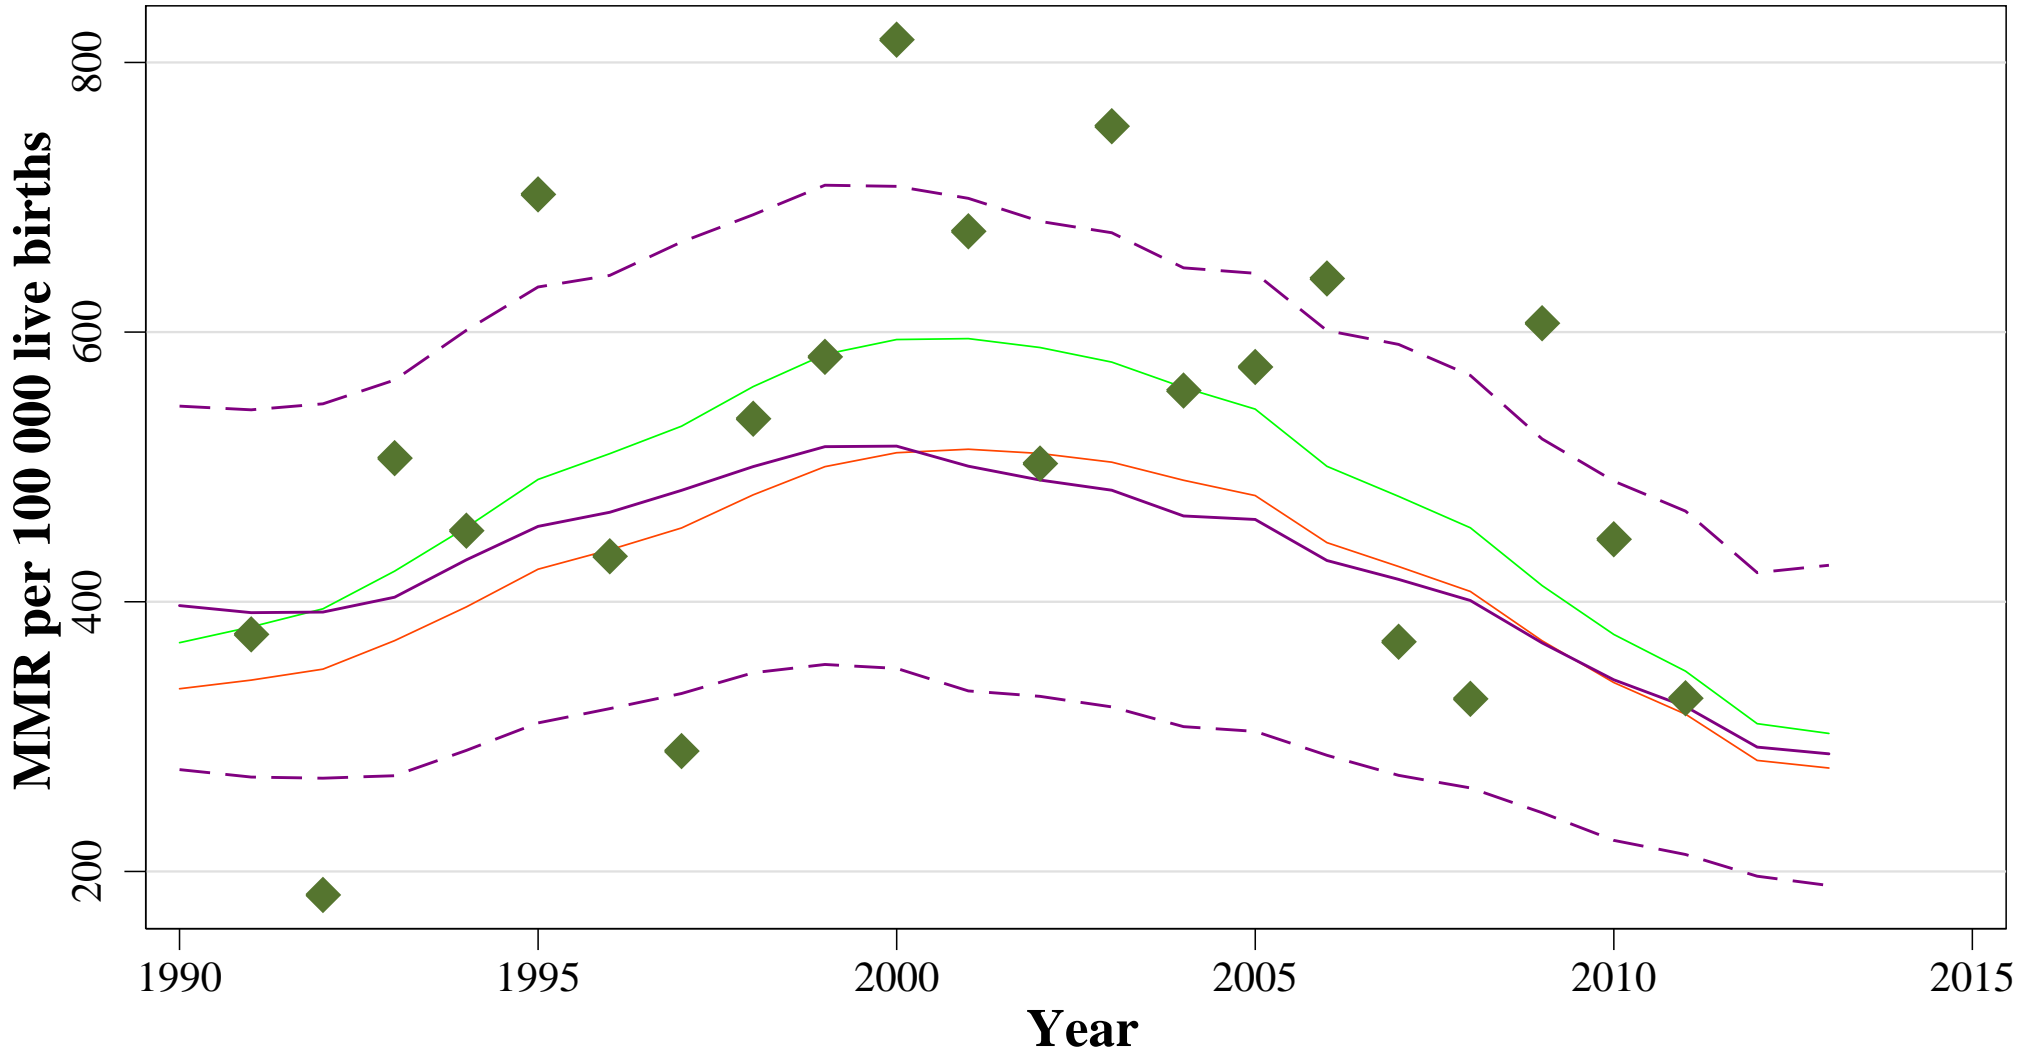



# Costa Rica

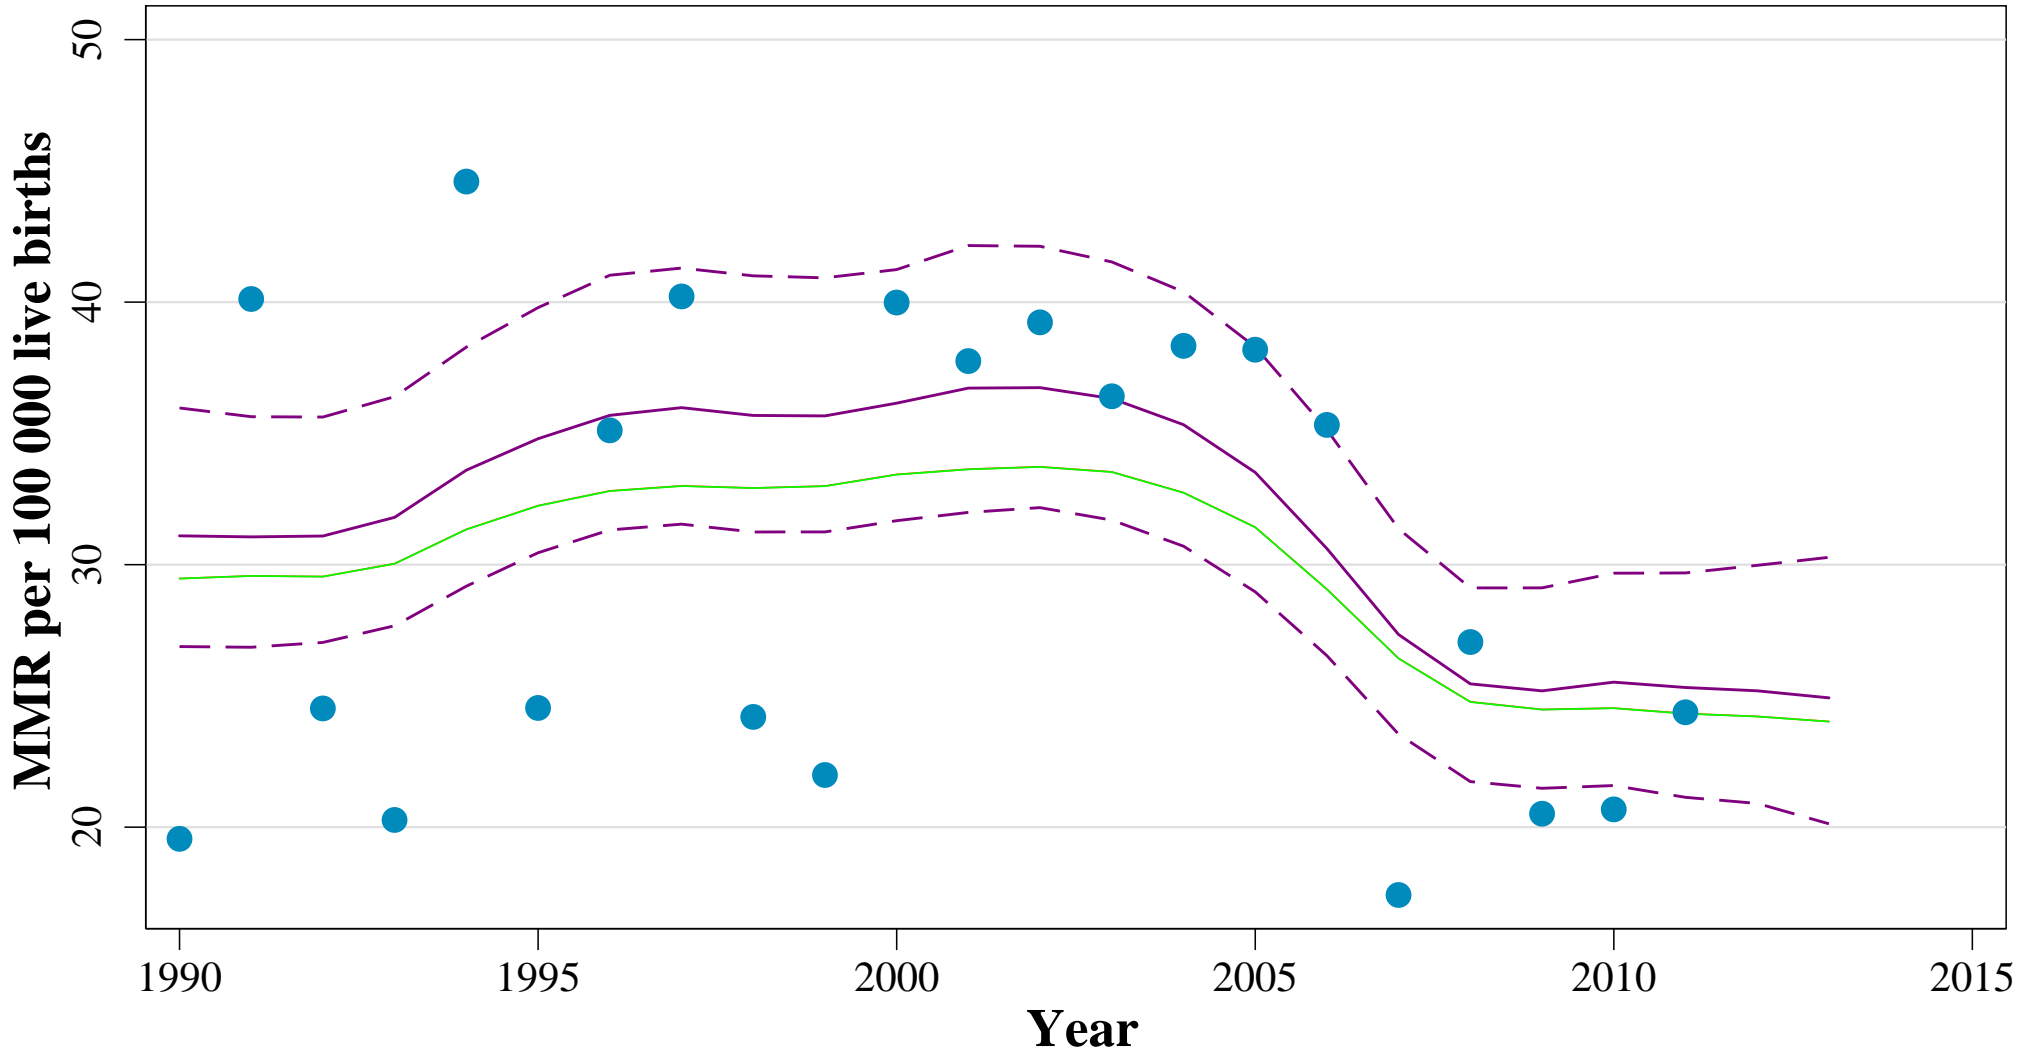

# Cote d'Ivoire

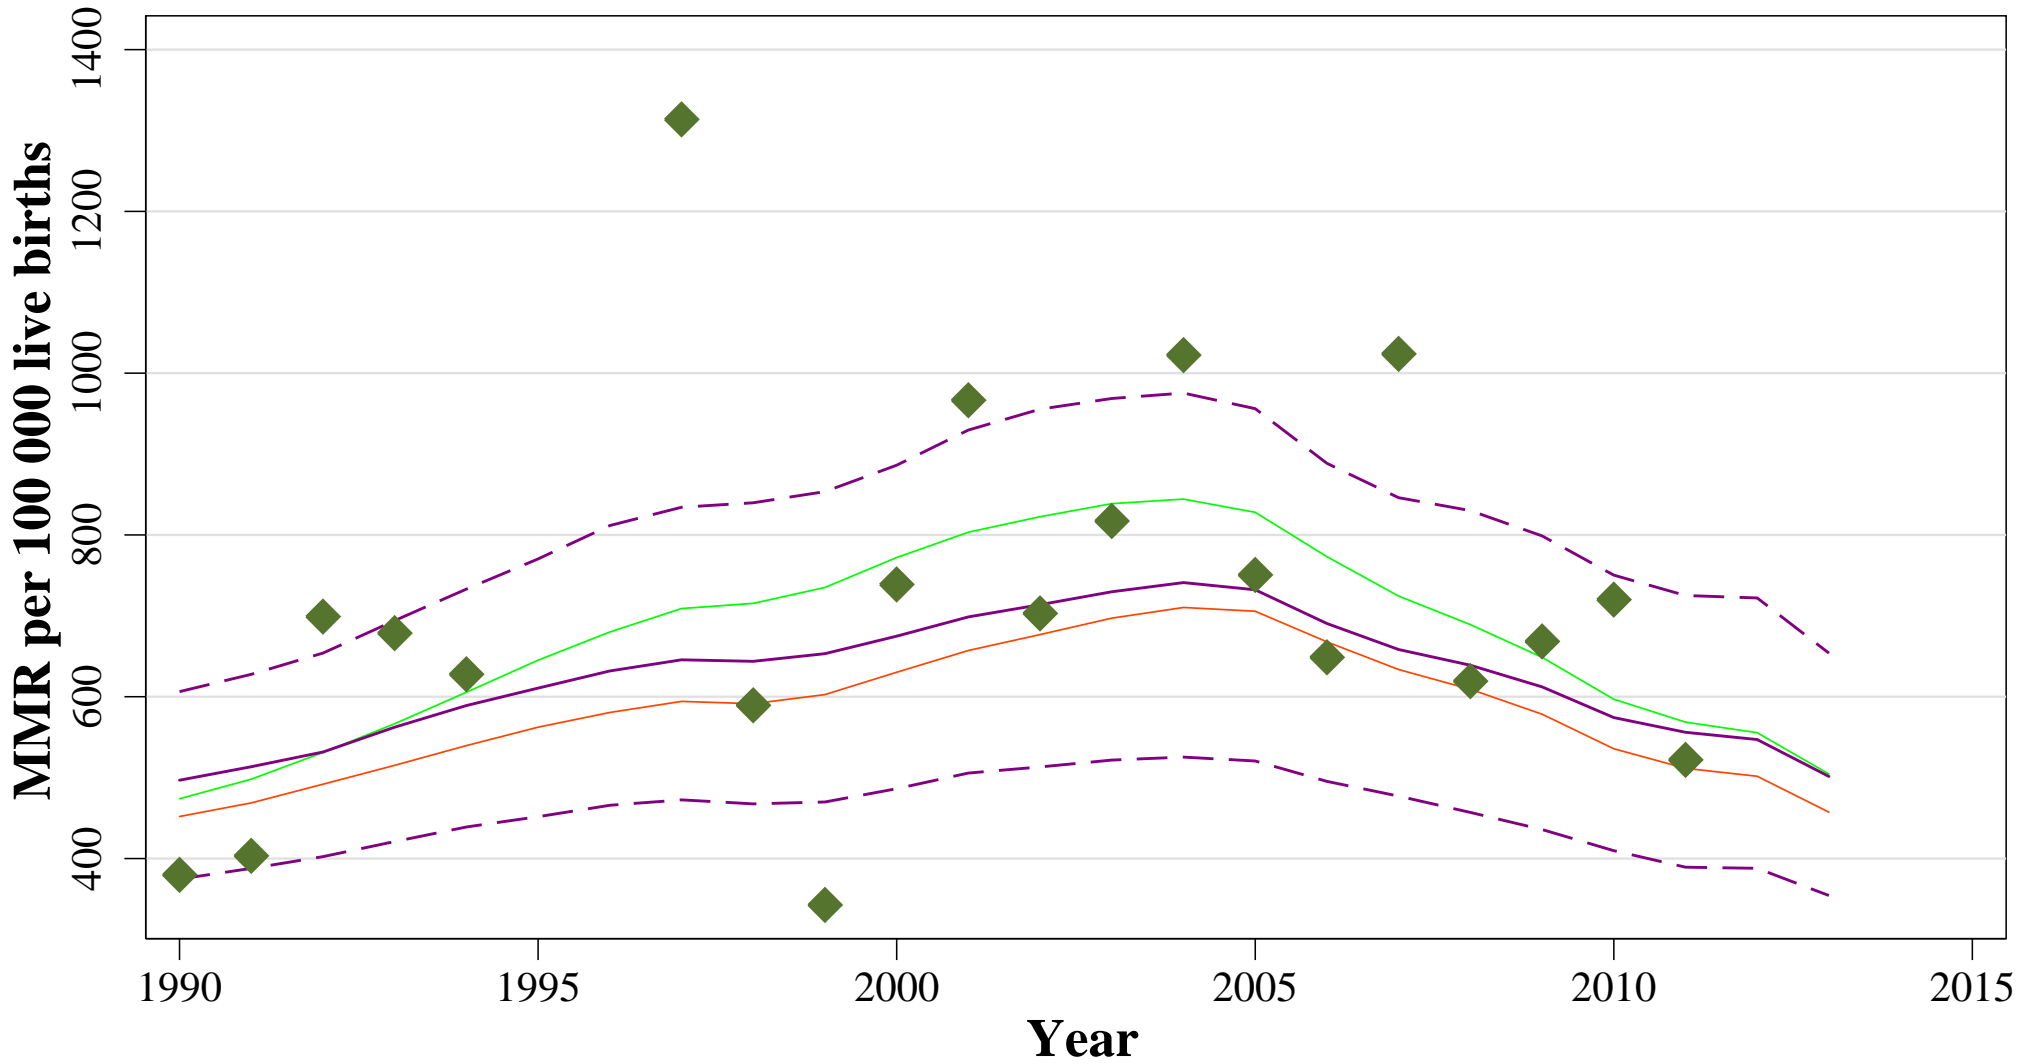

# Croatia

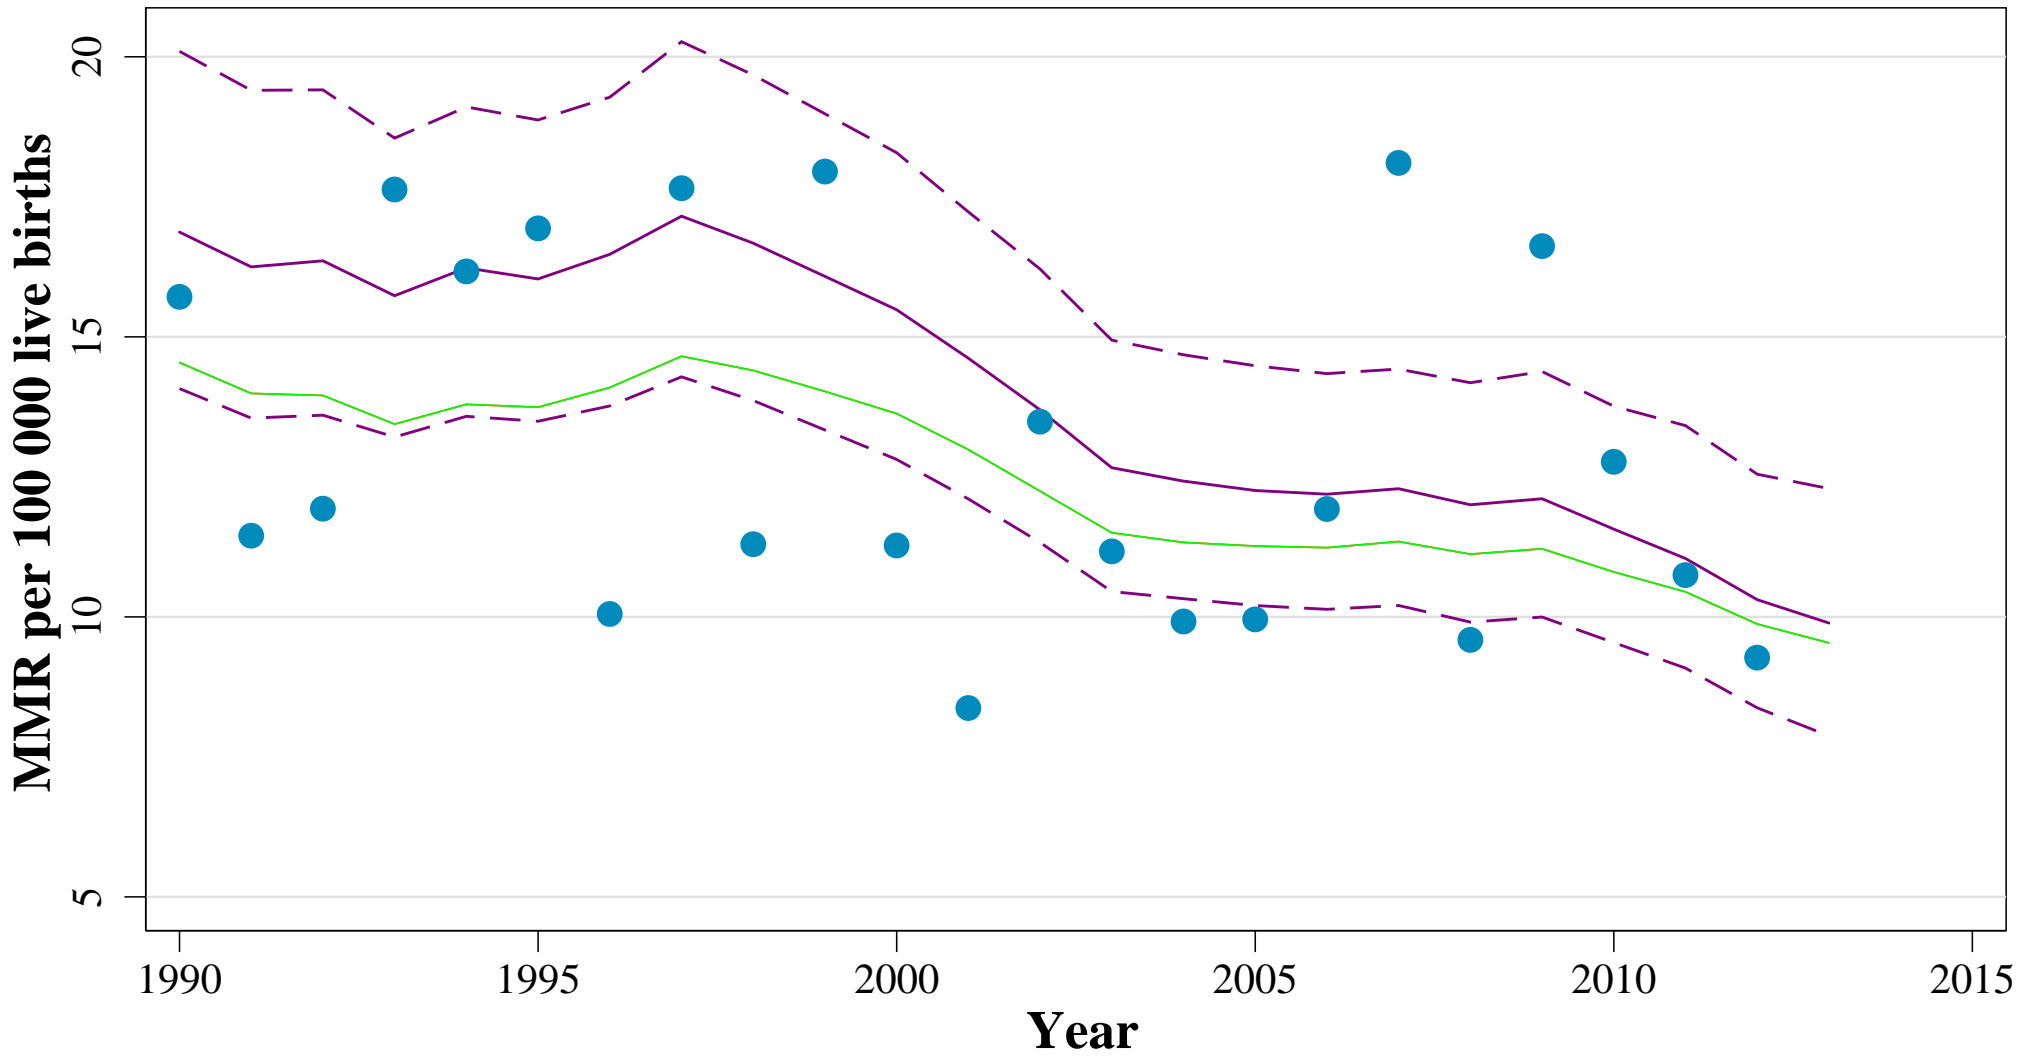

# Cuba

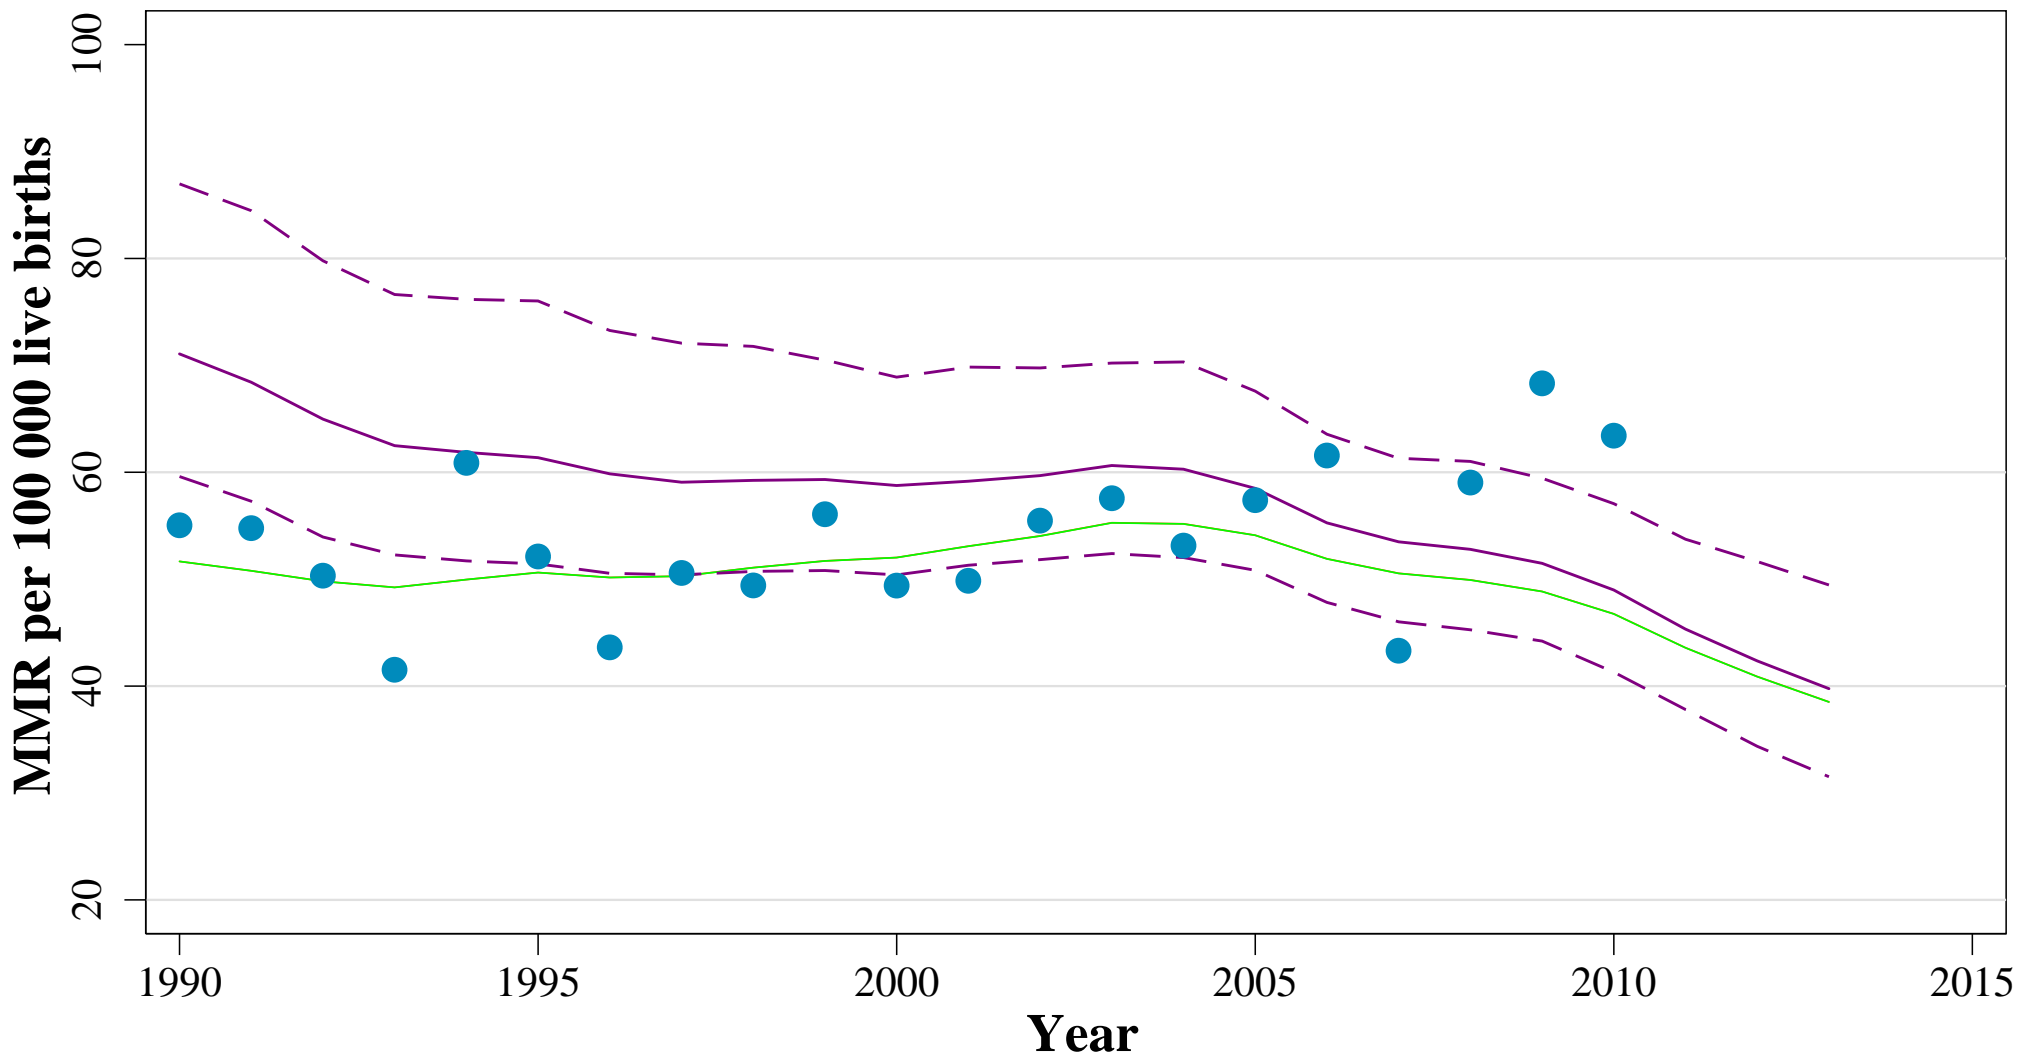

# Cyprus

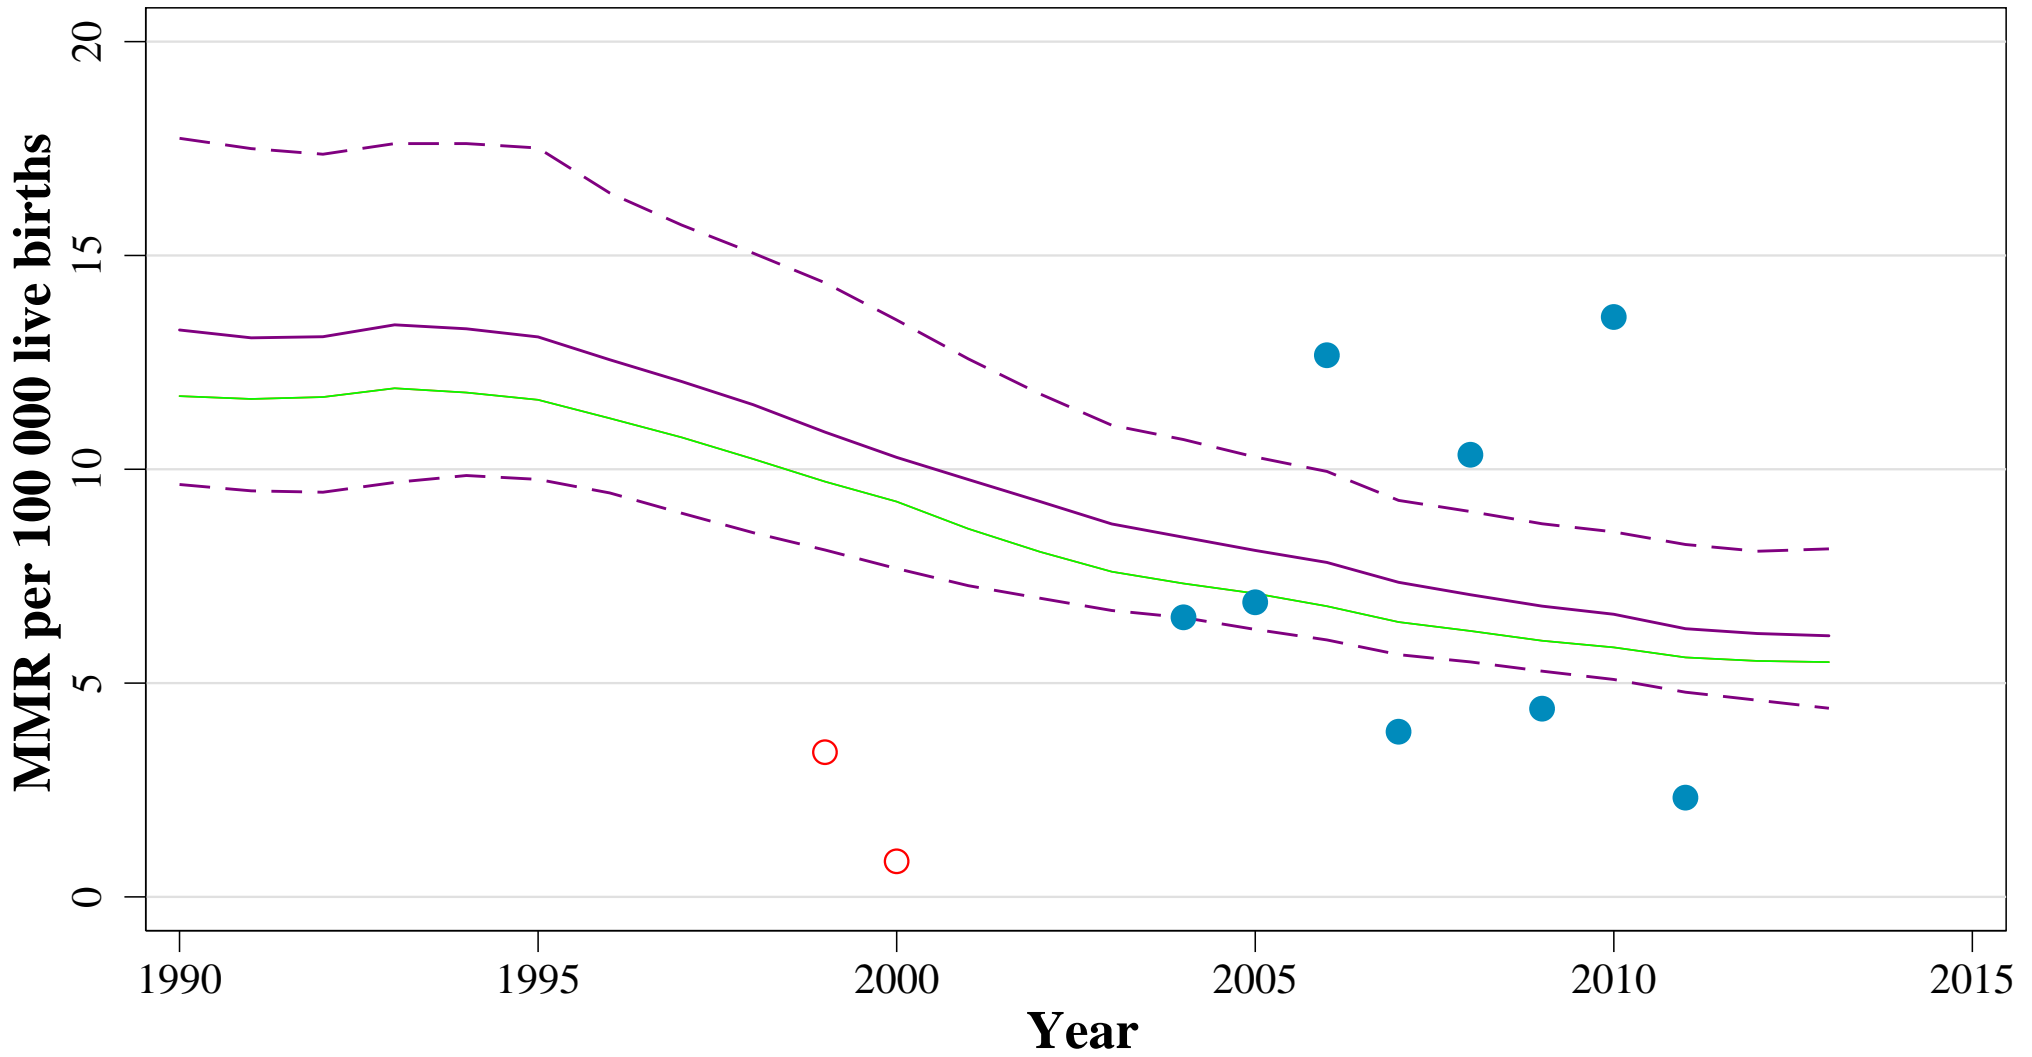

# Czech Republic

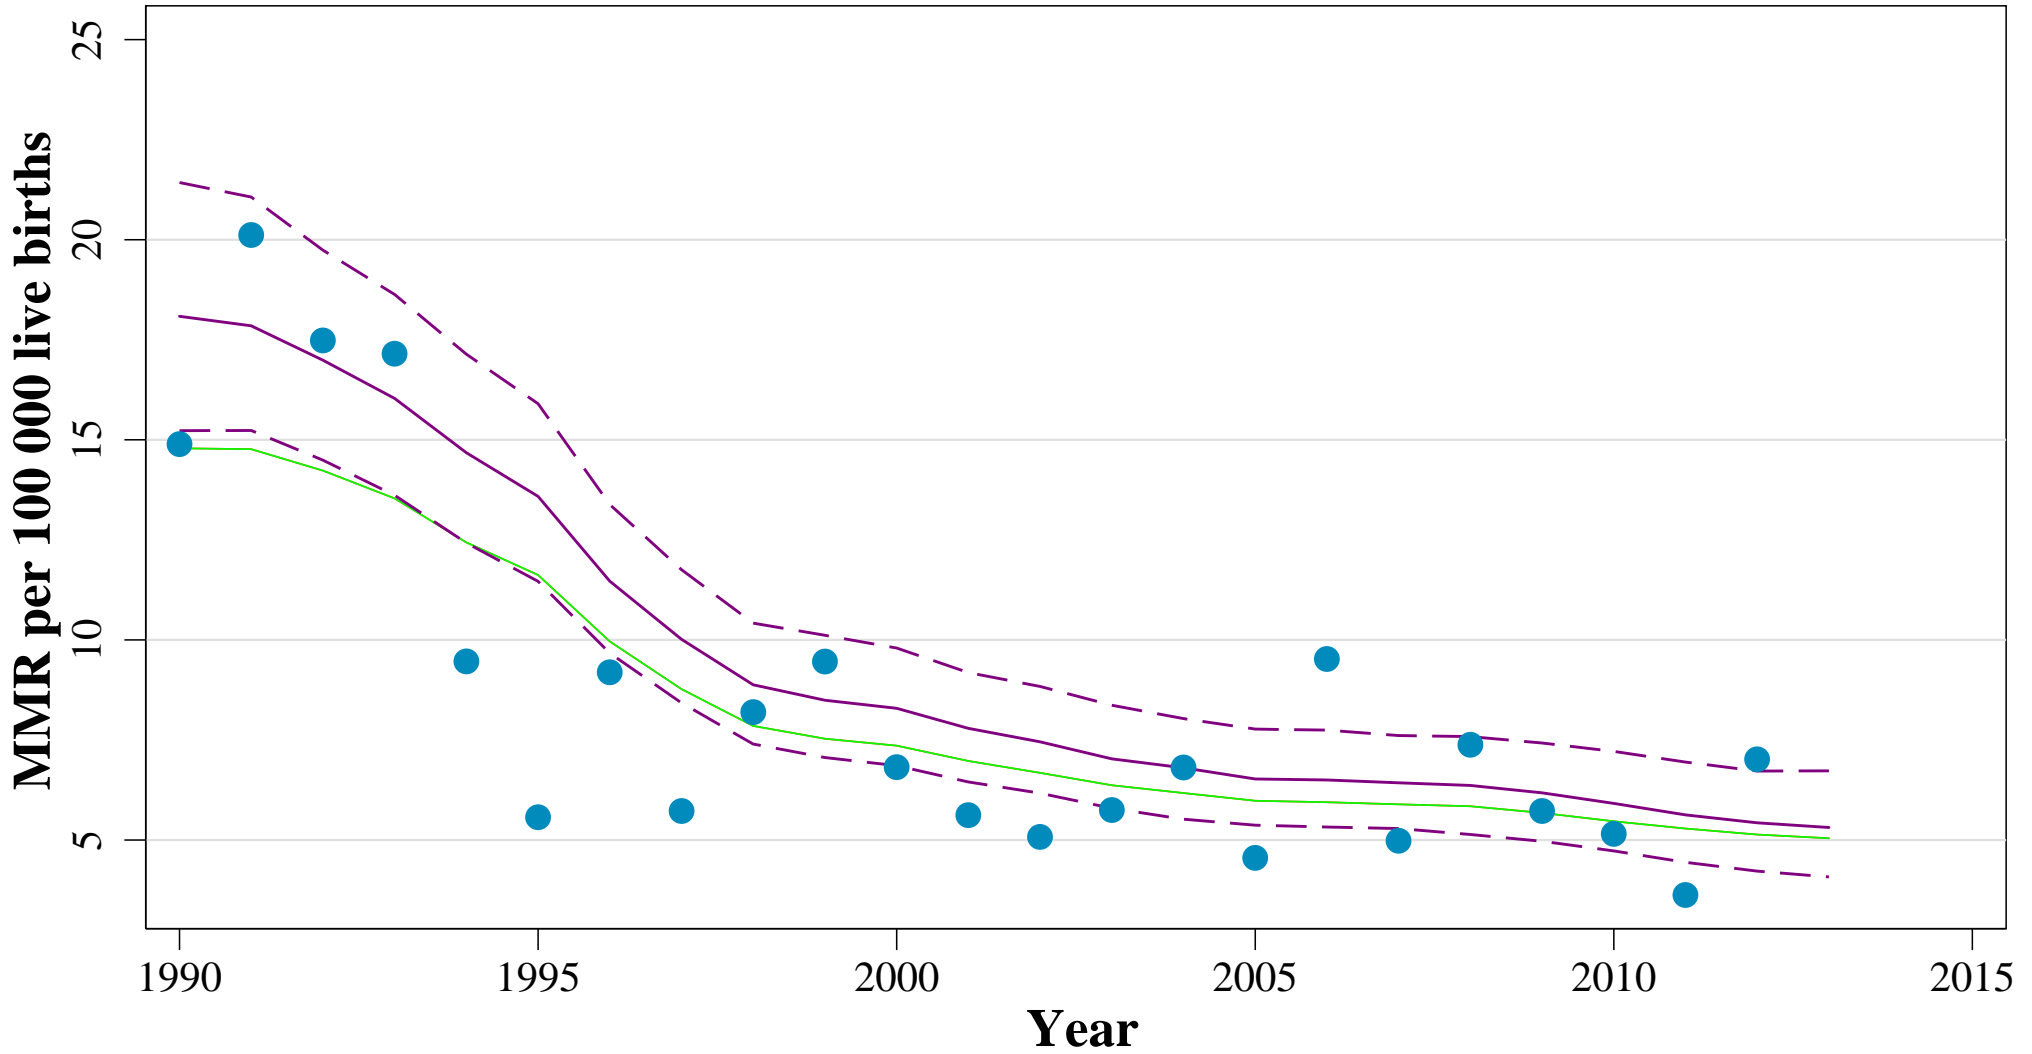

# Democratic Republic of the Congo

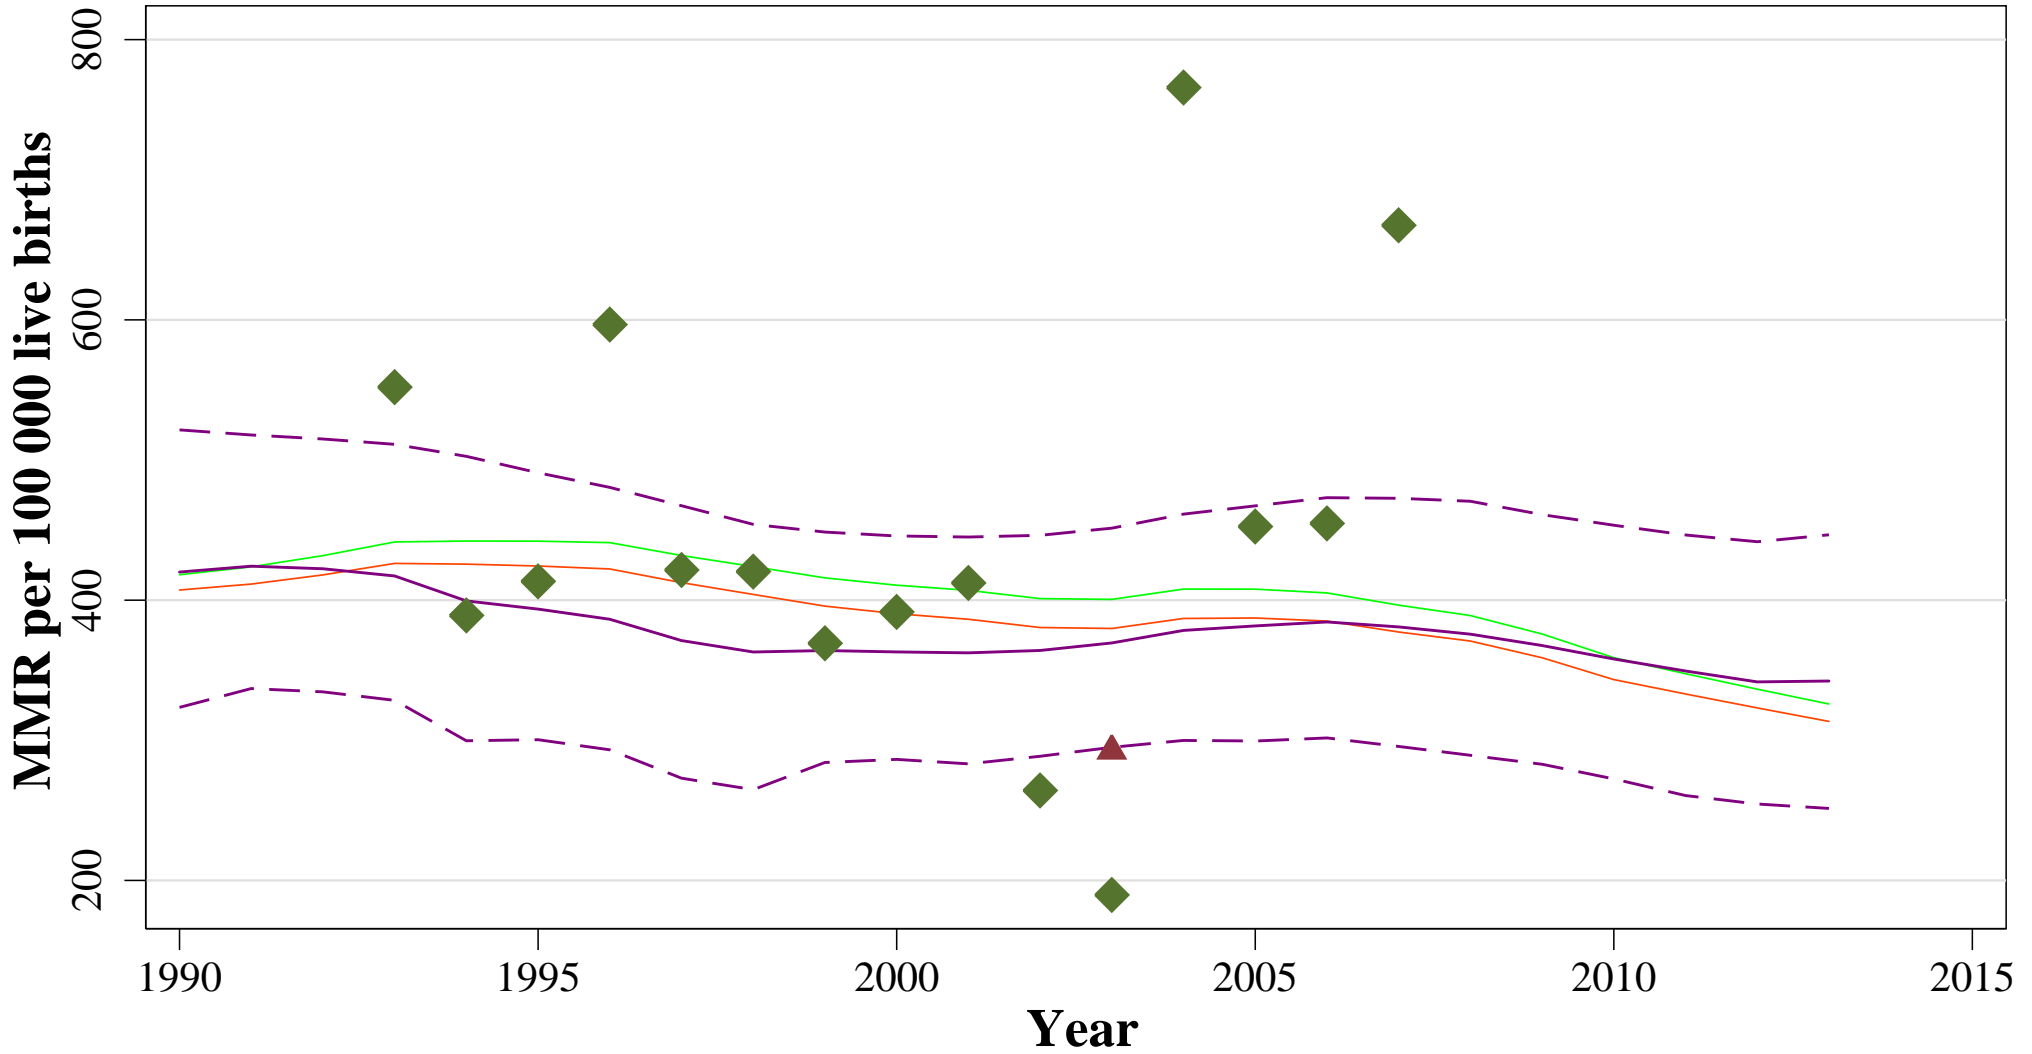

# Denmark

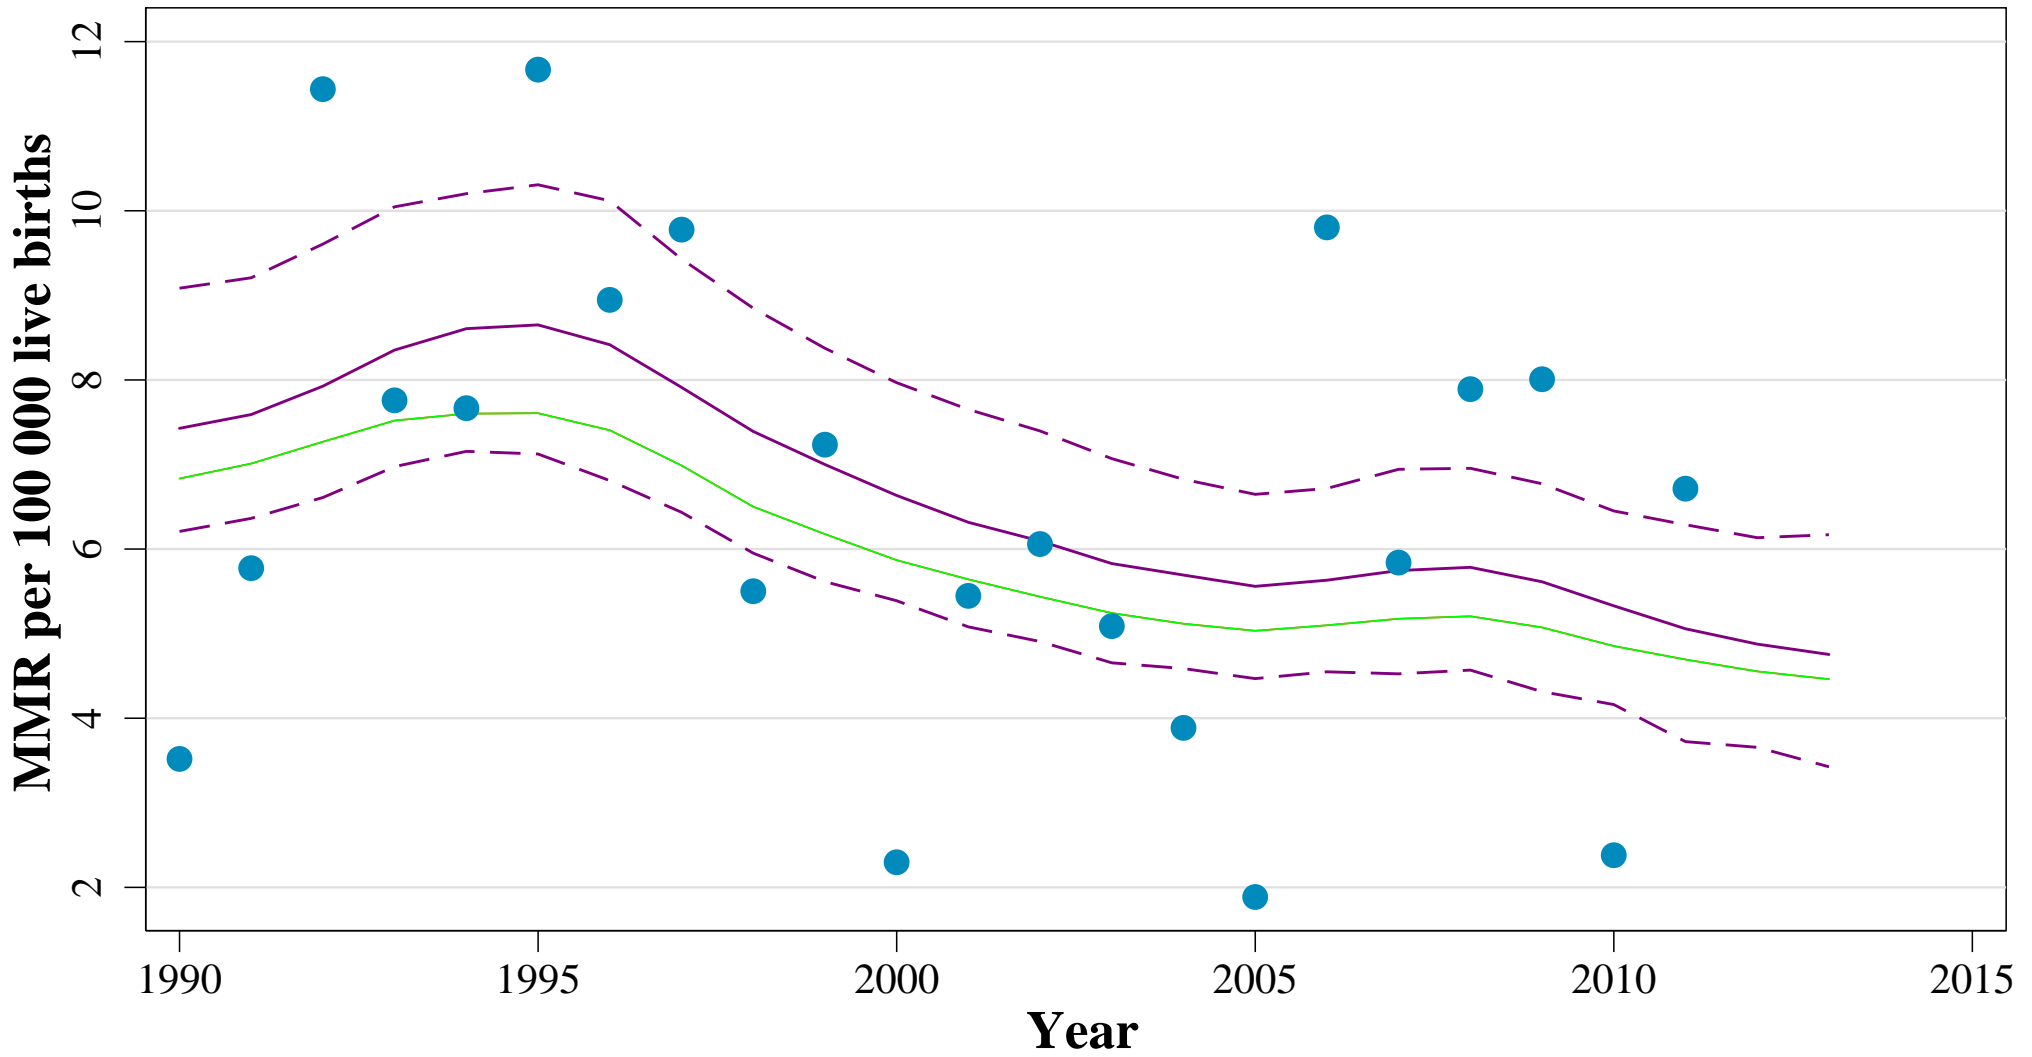



# Djibouti

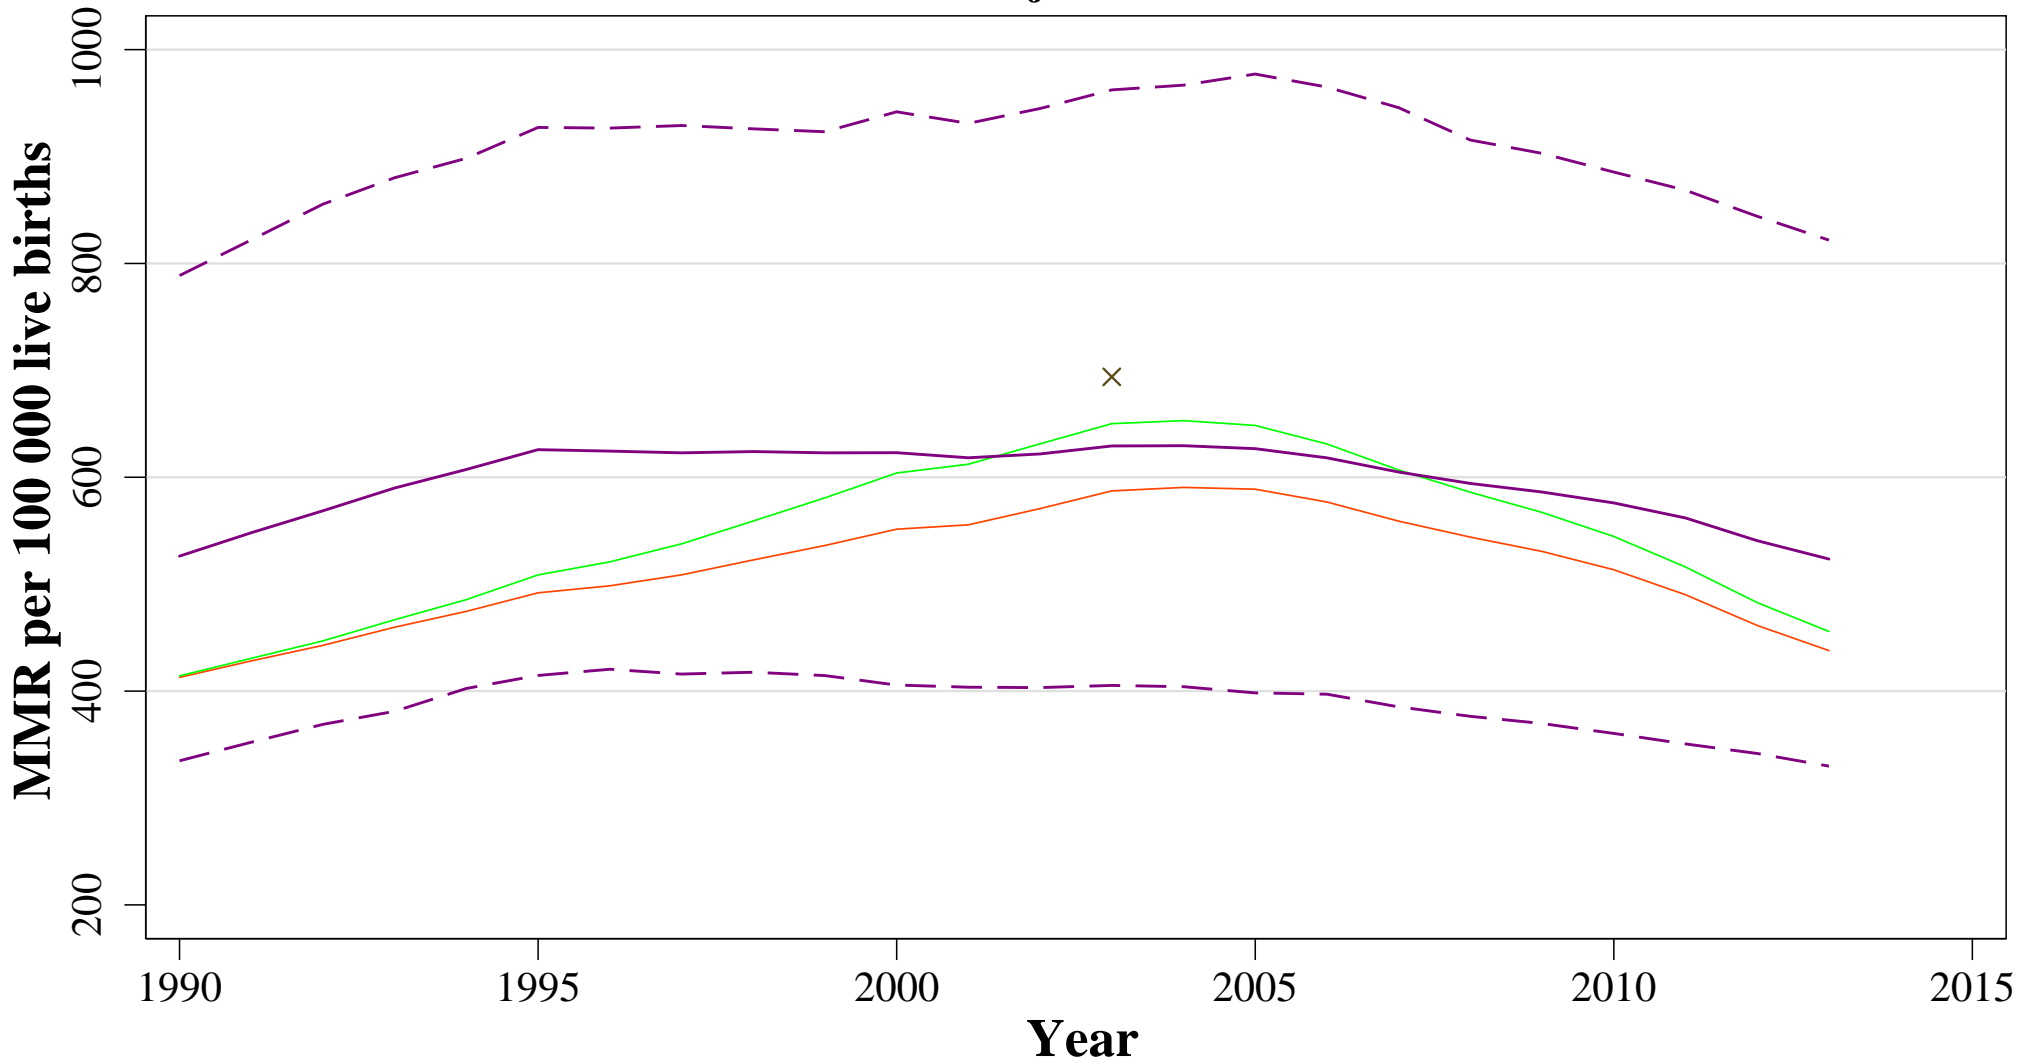

# Dominica

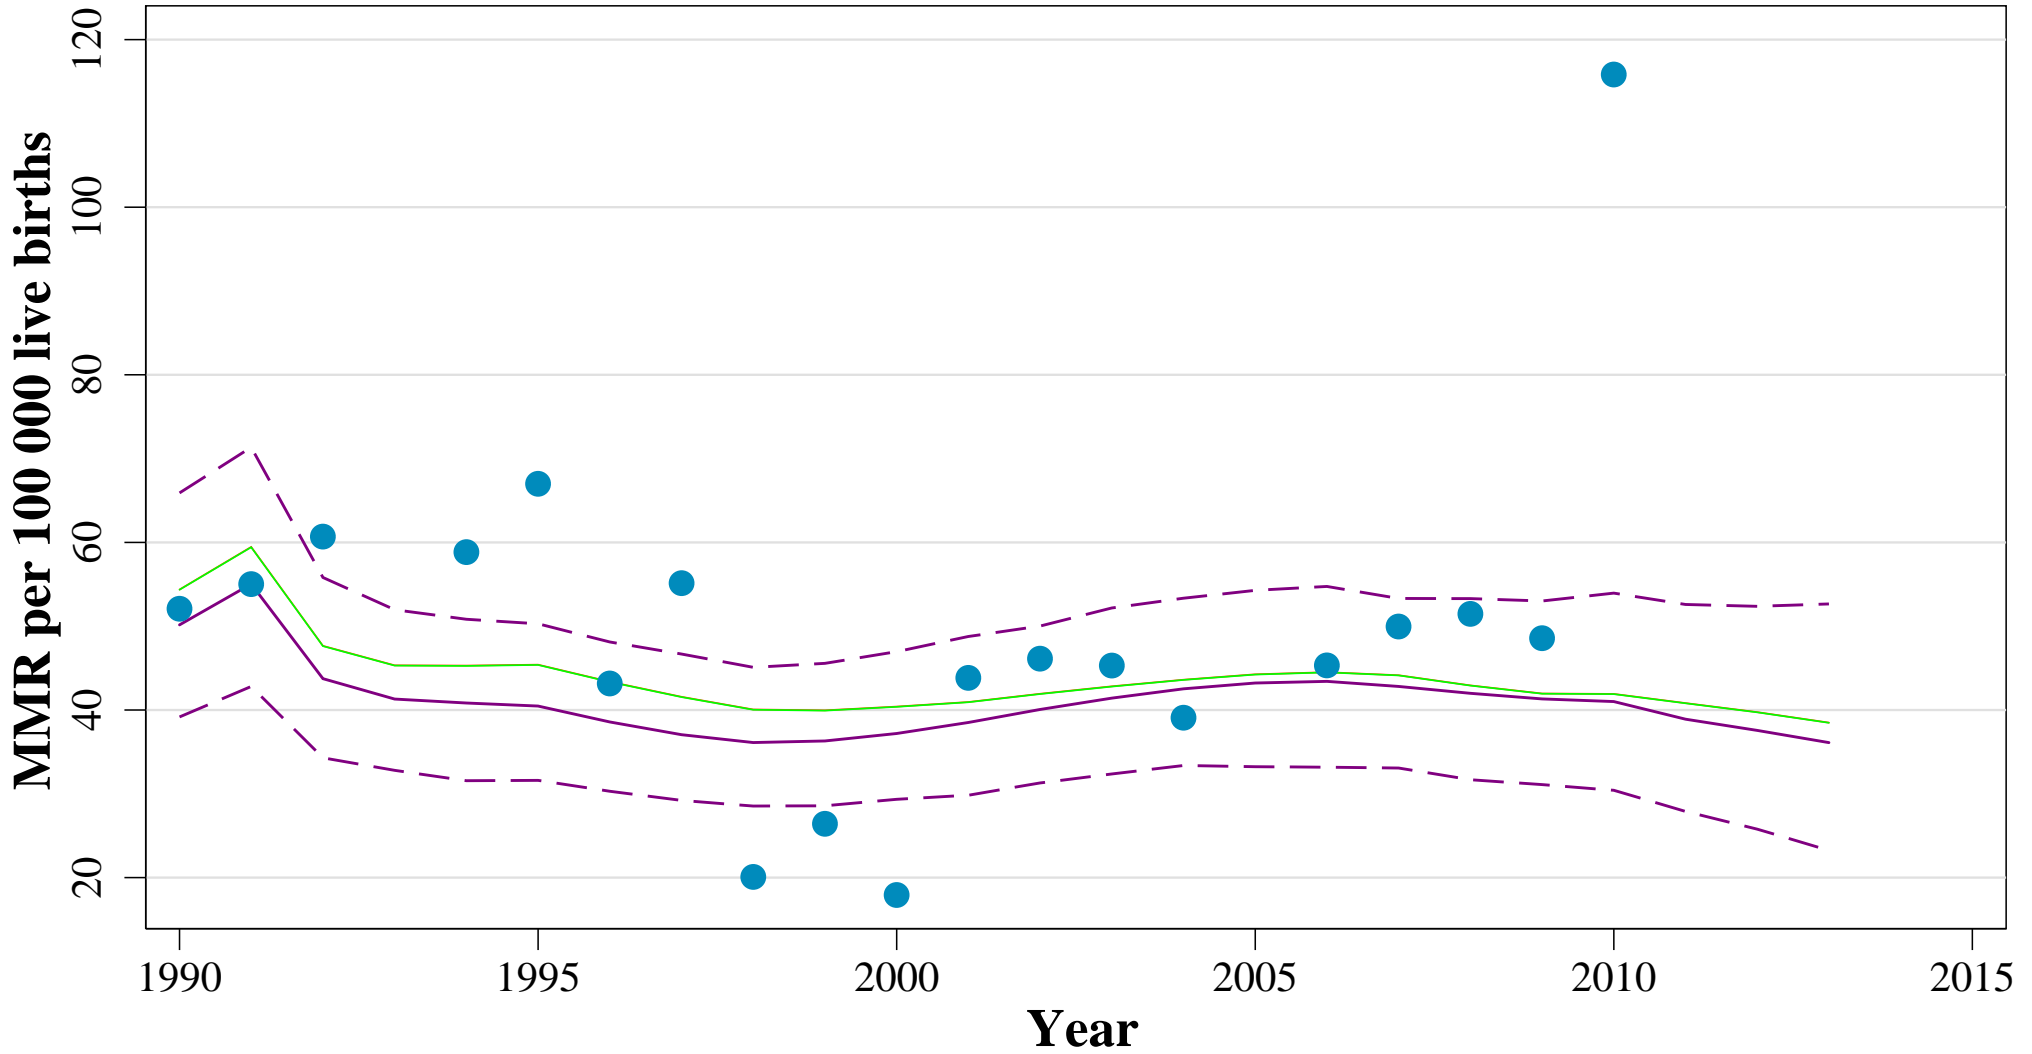

# Dominican Republic

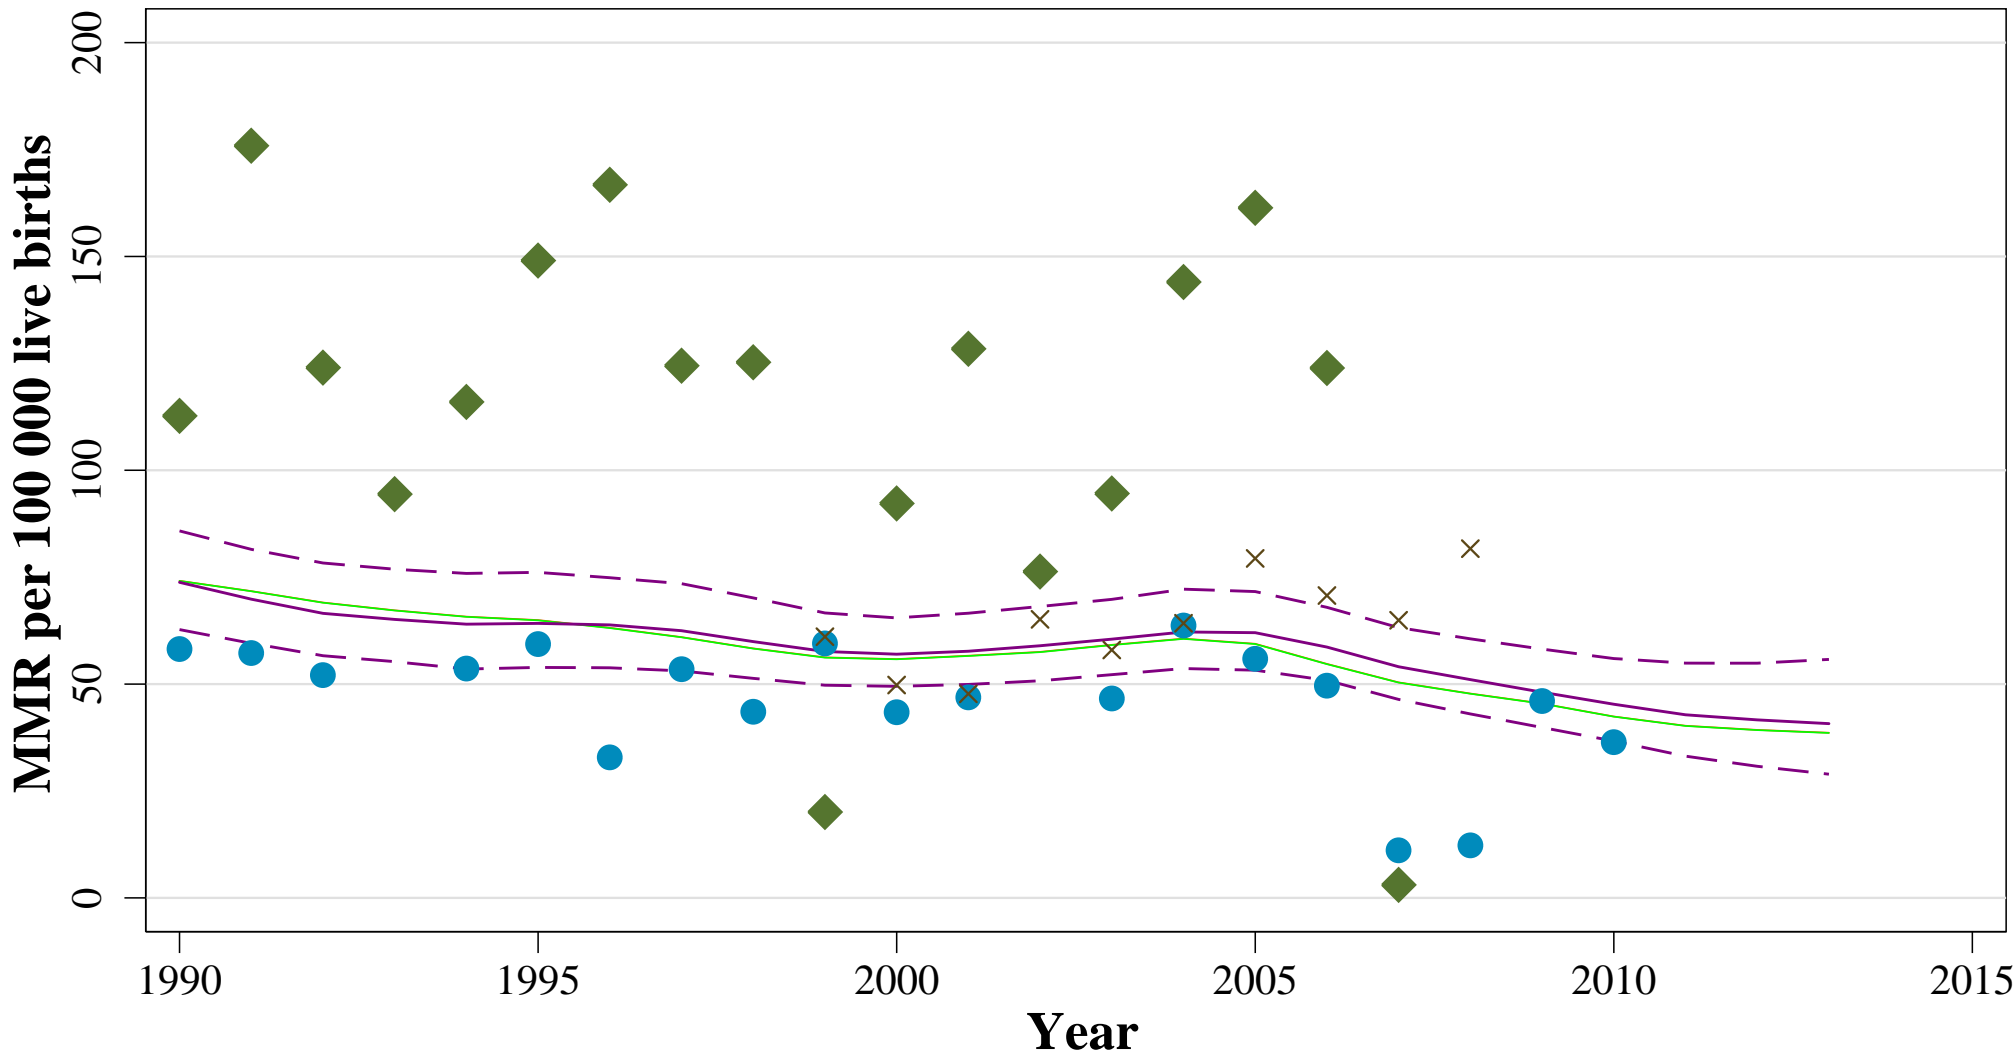

# Ecuador

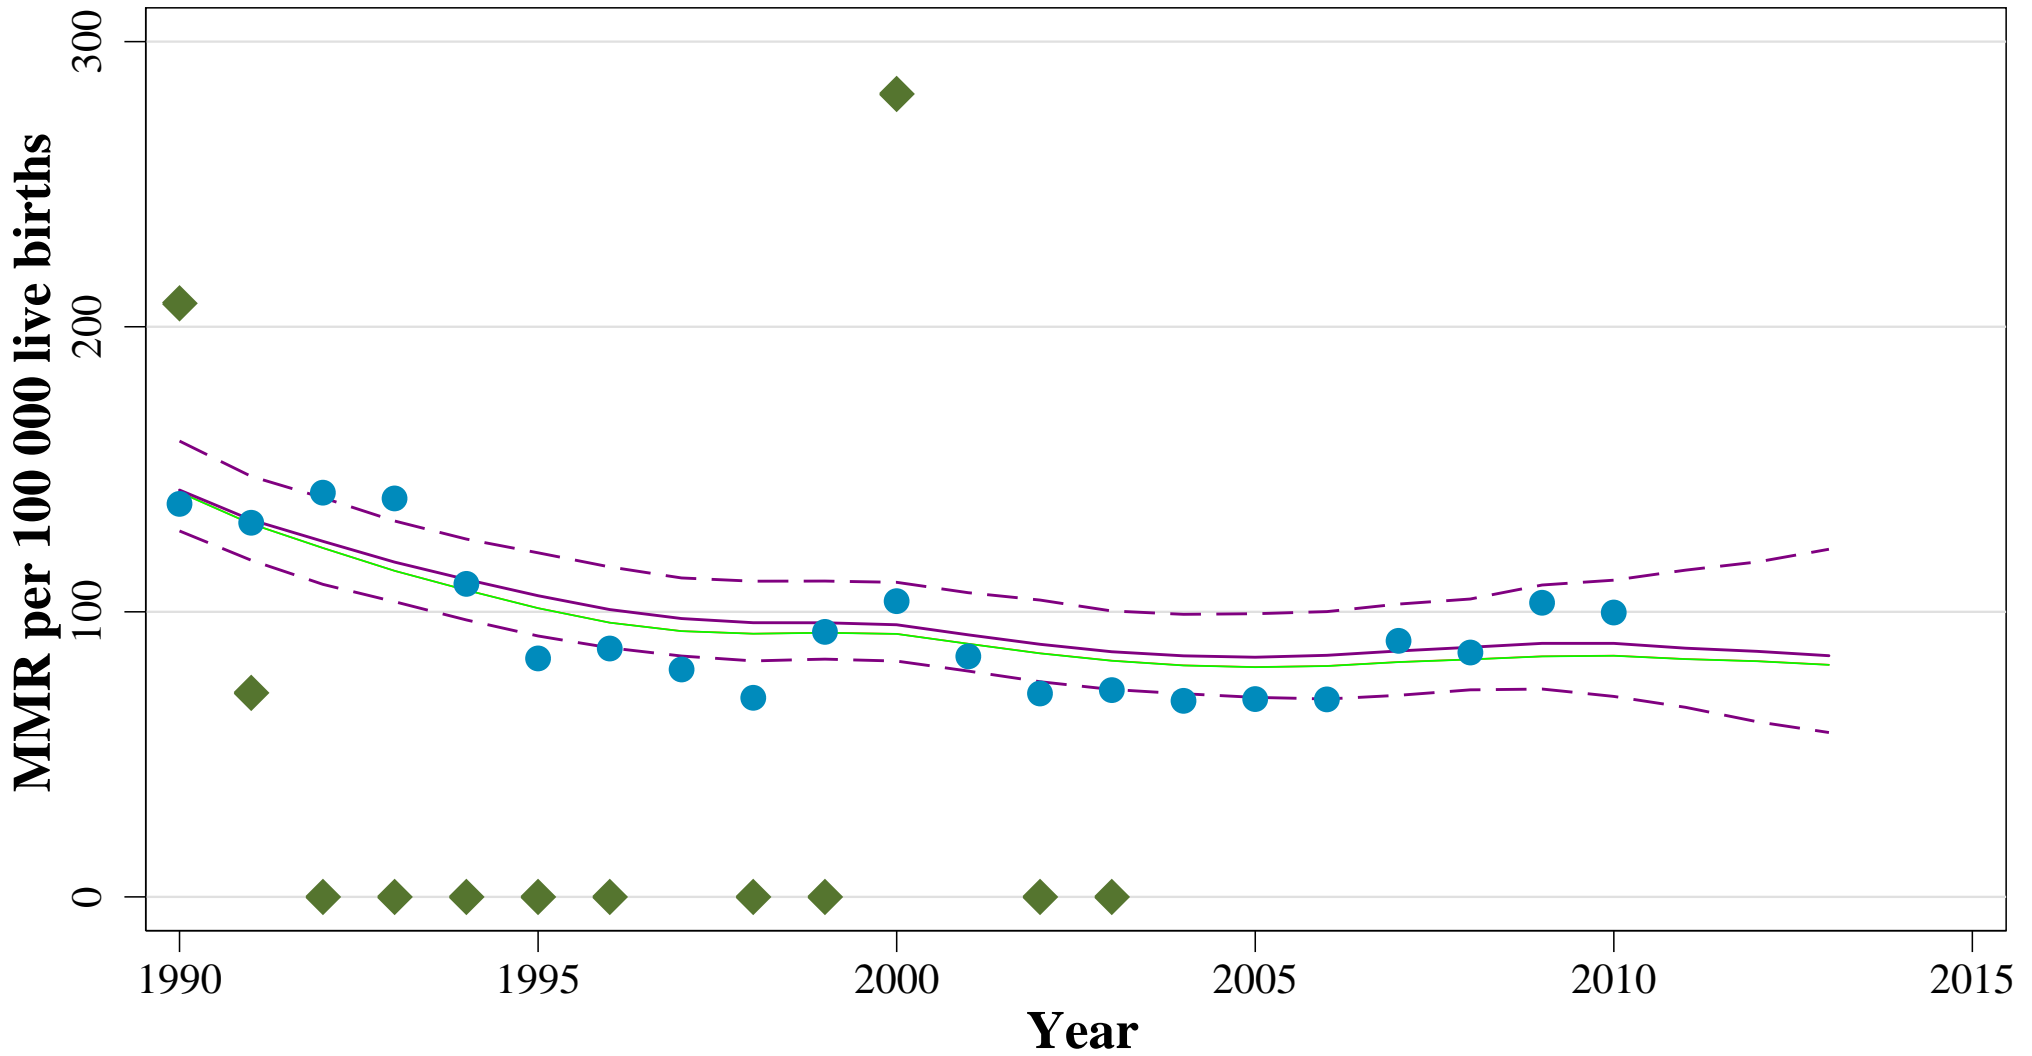

# Egypt

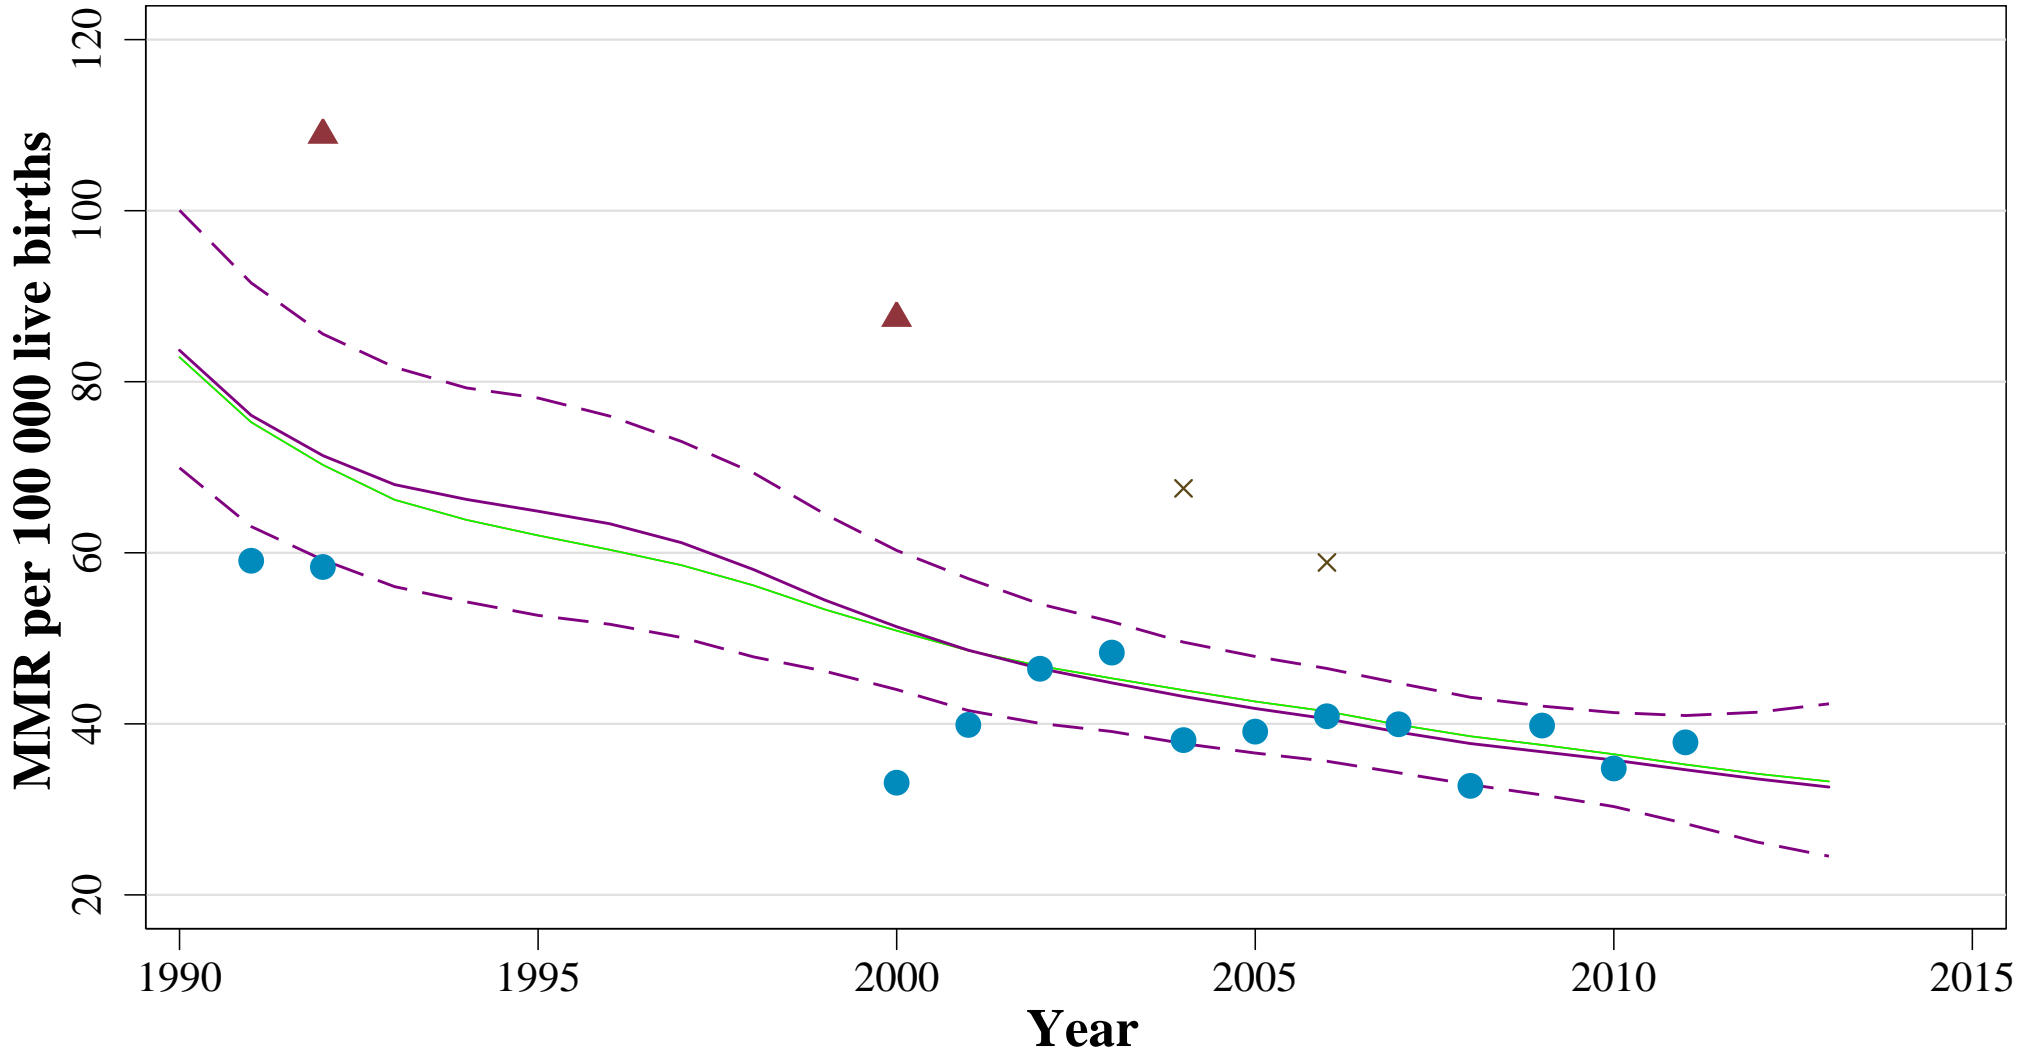

# El Salvador

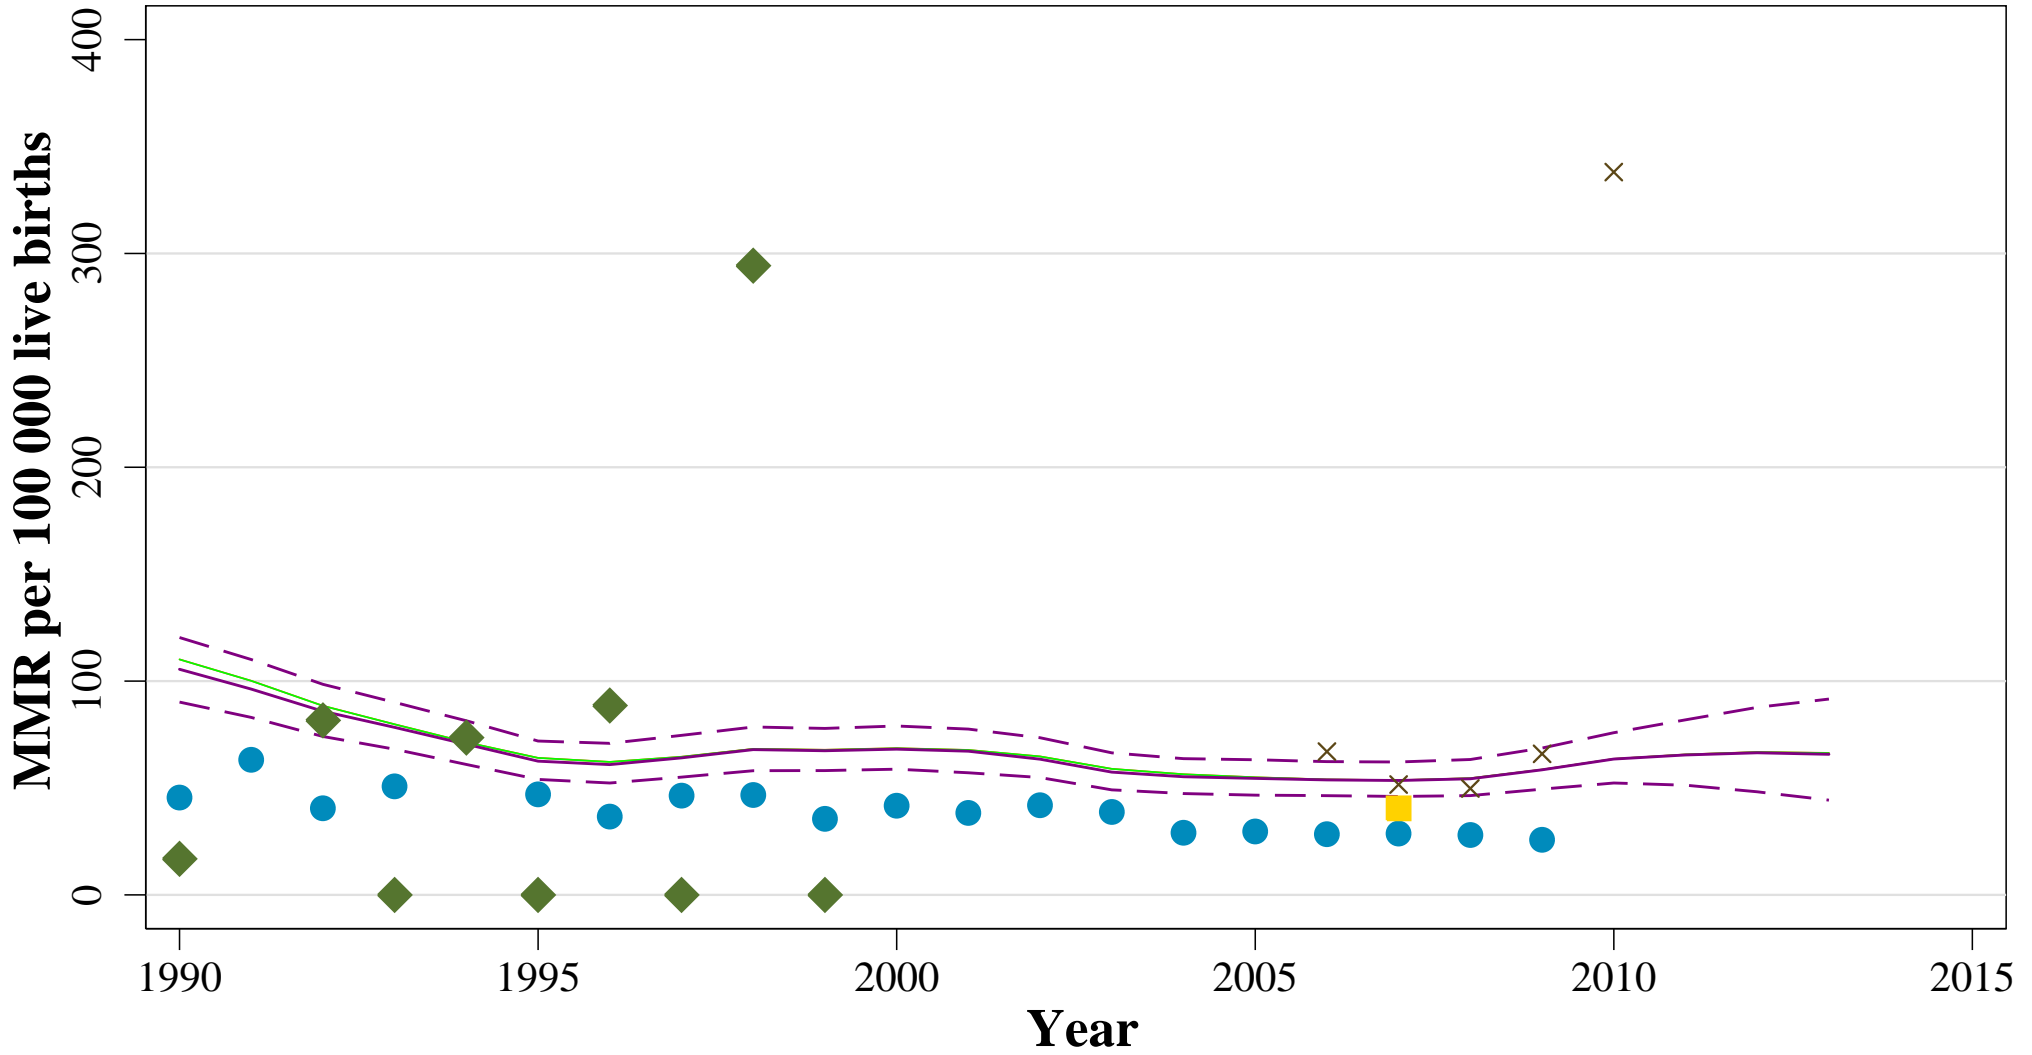

# Equatorial Guinea

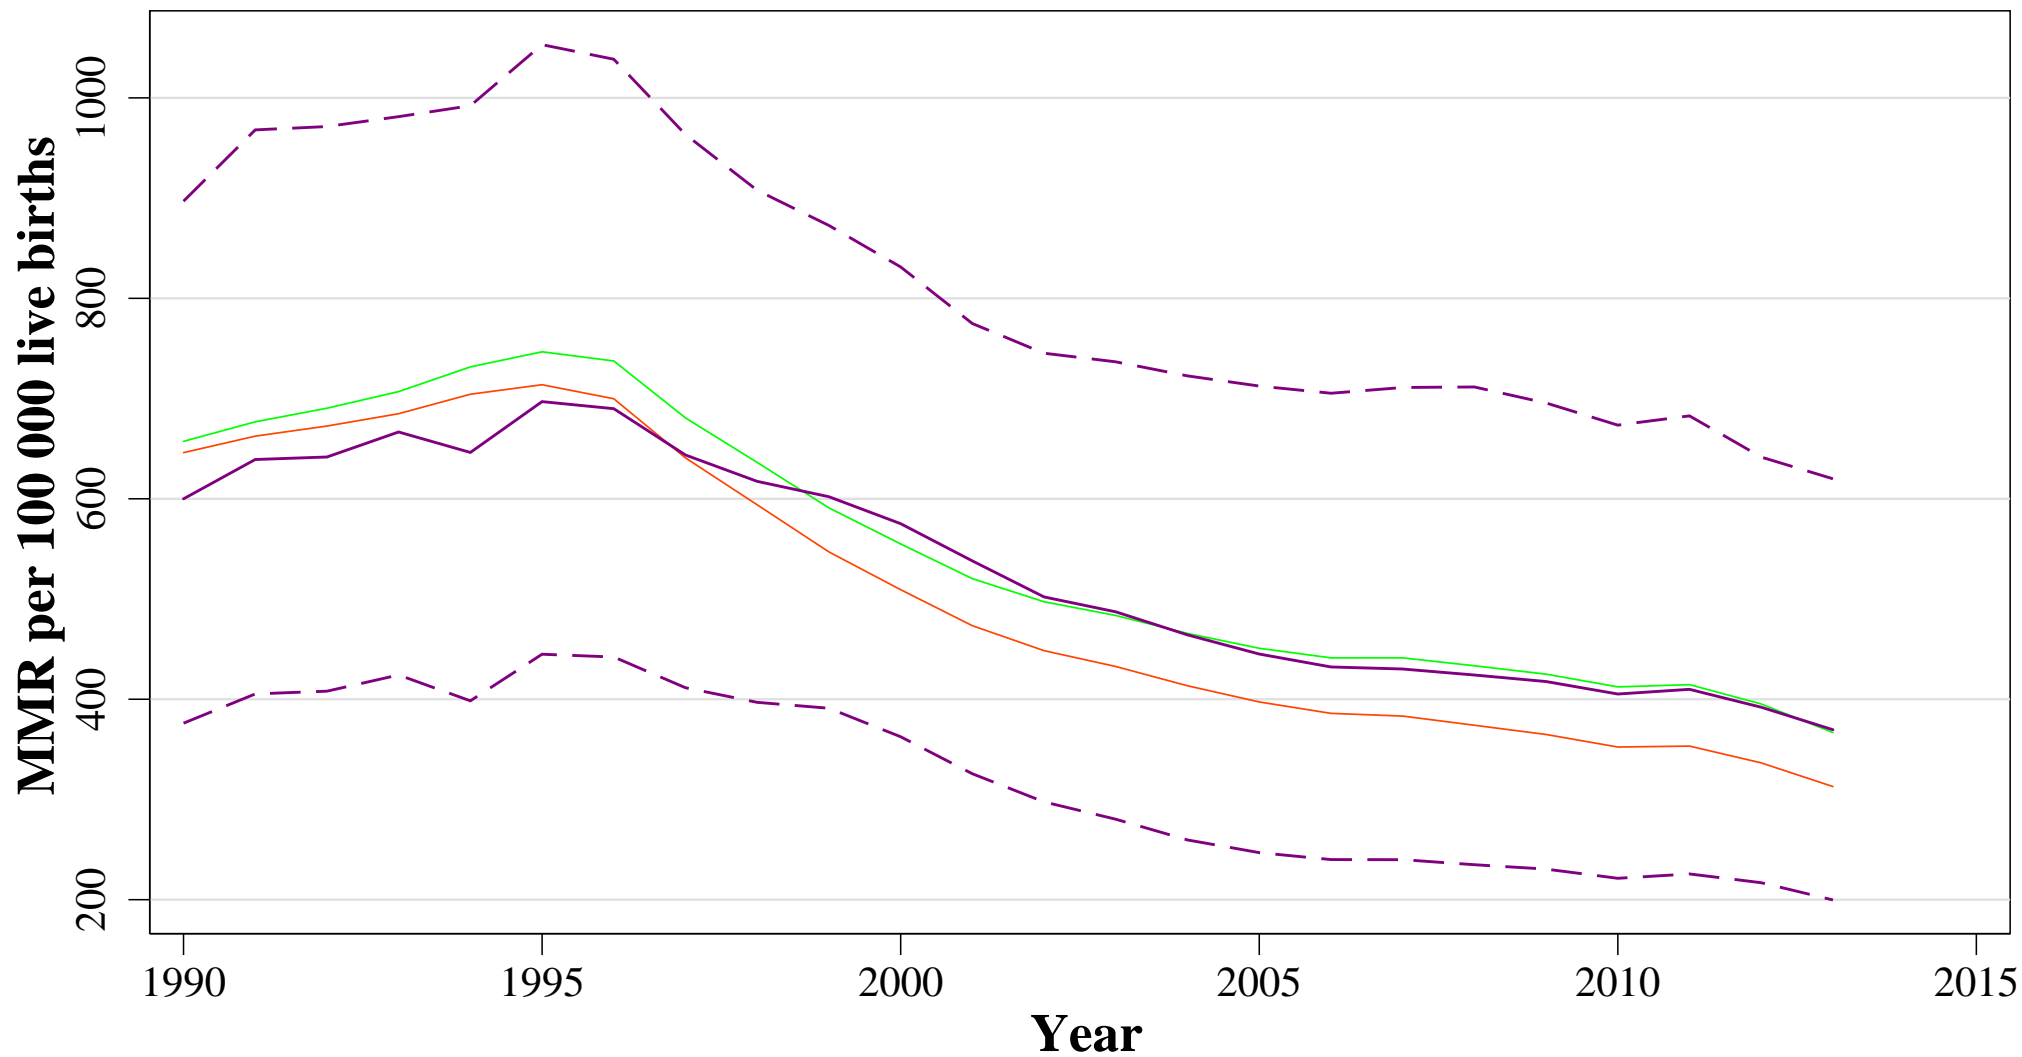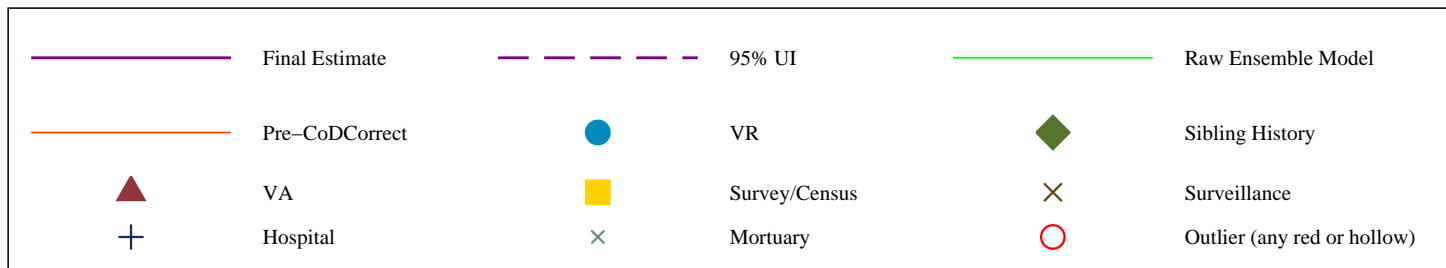

# Eritrea

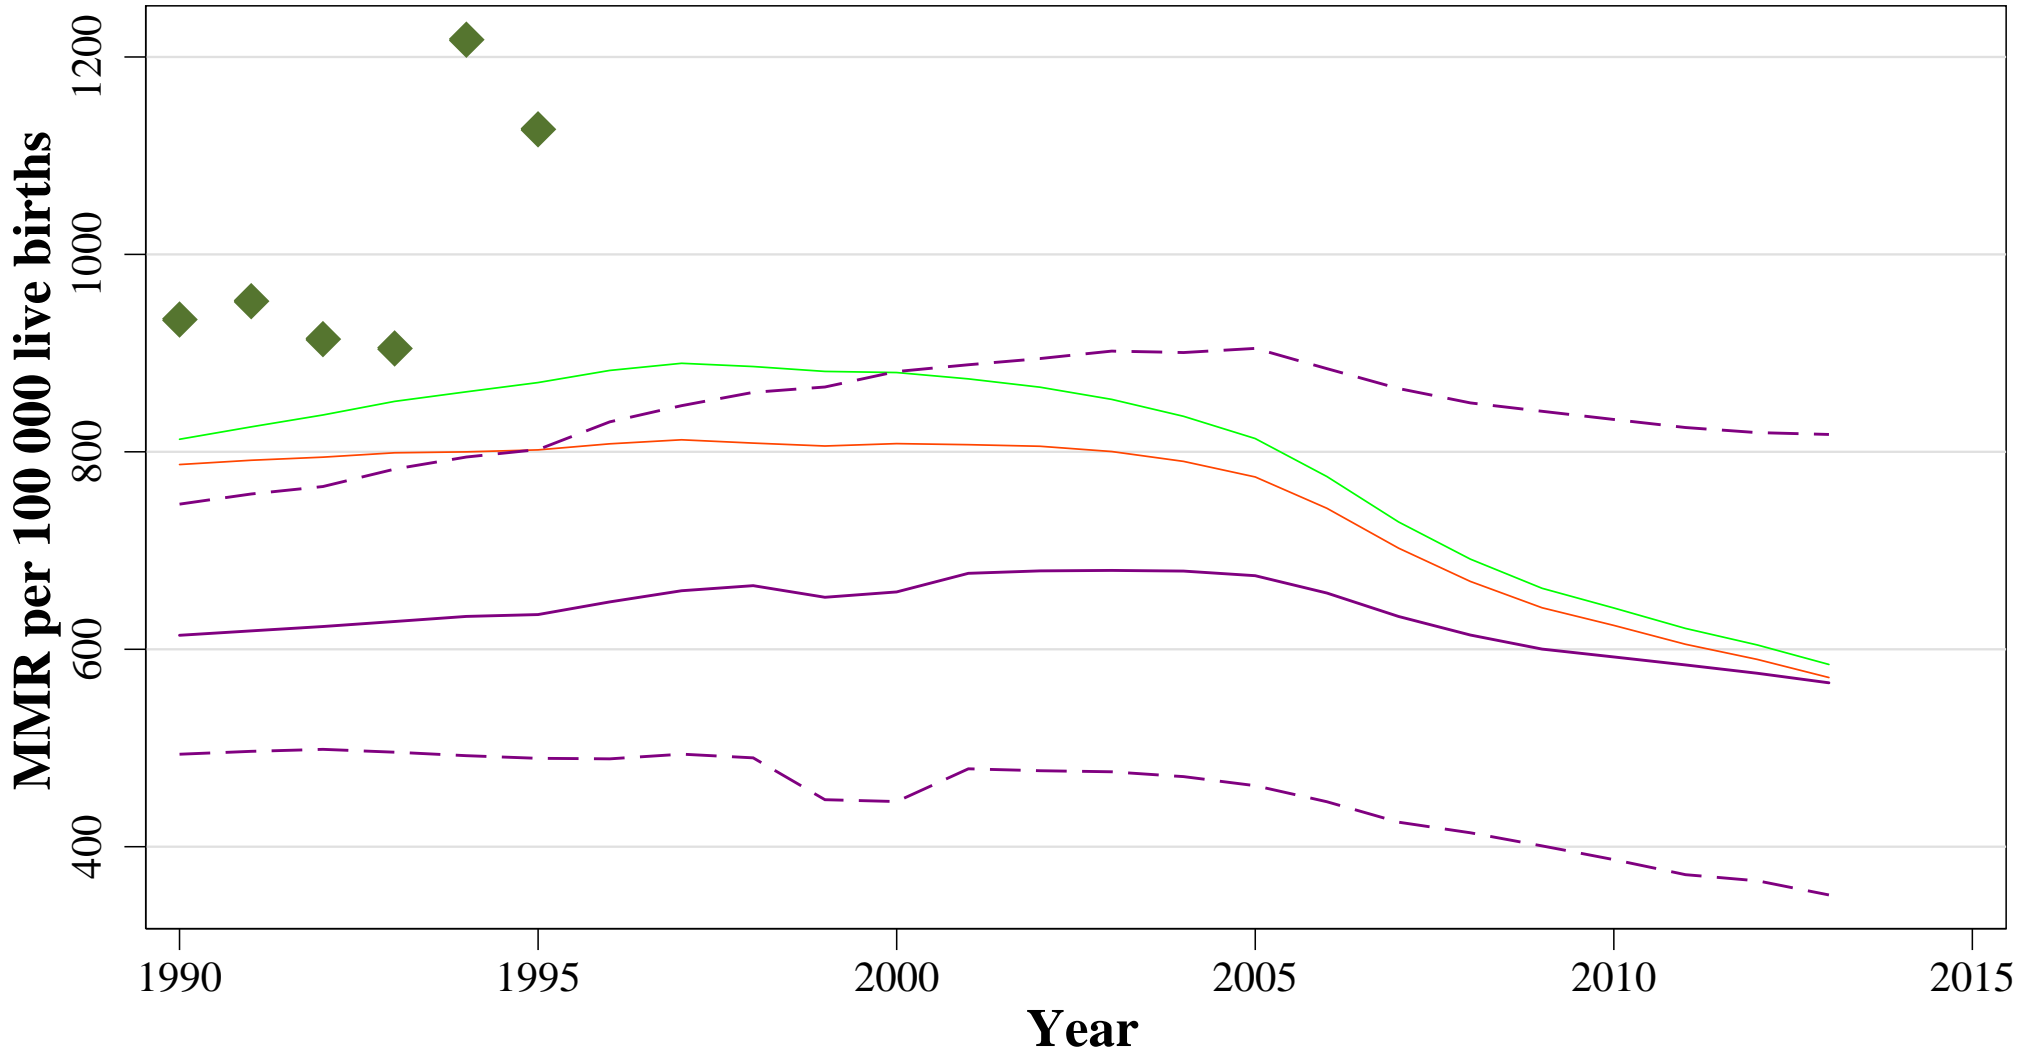



# Estonia

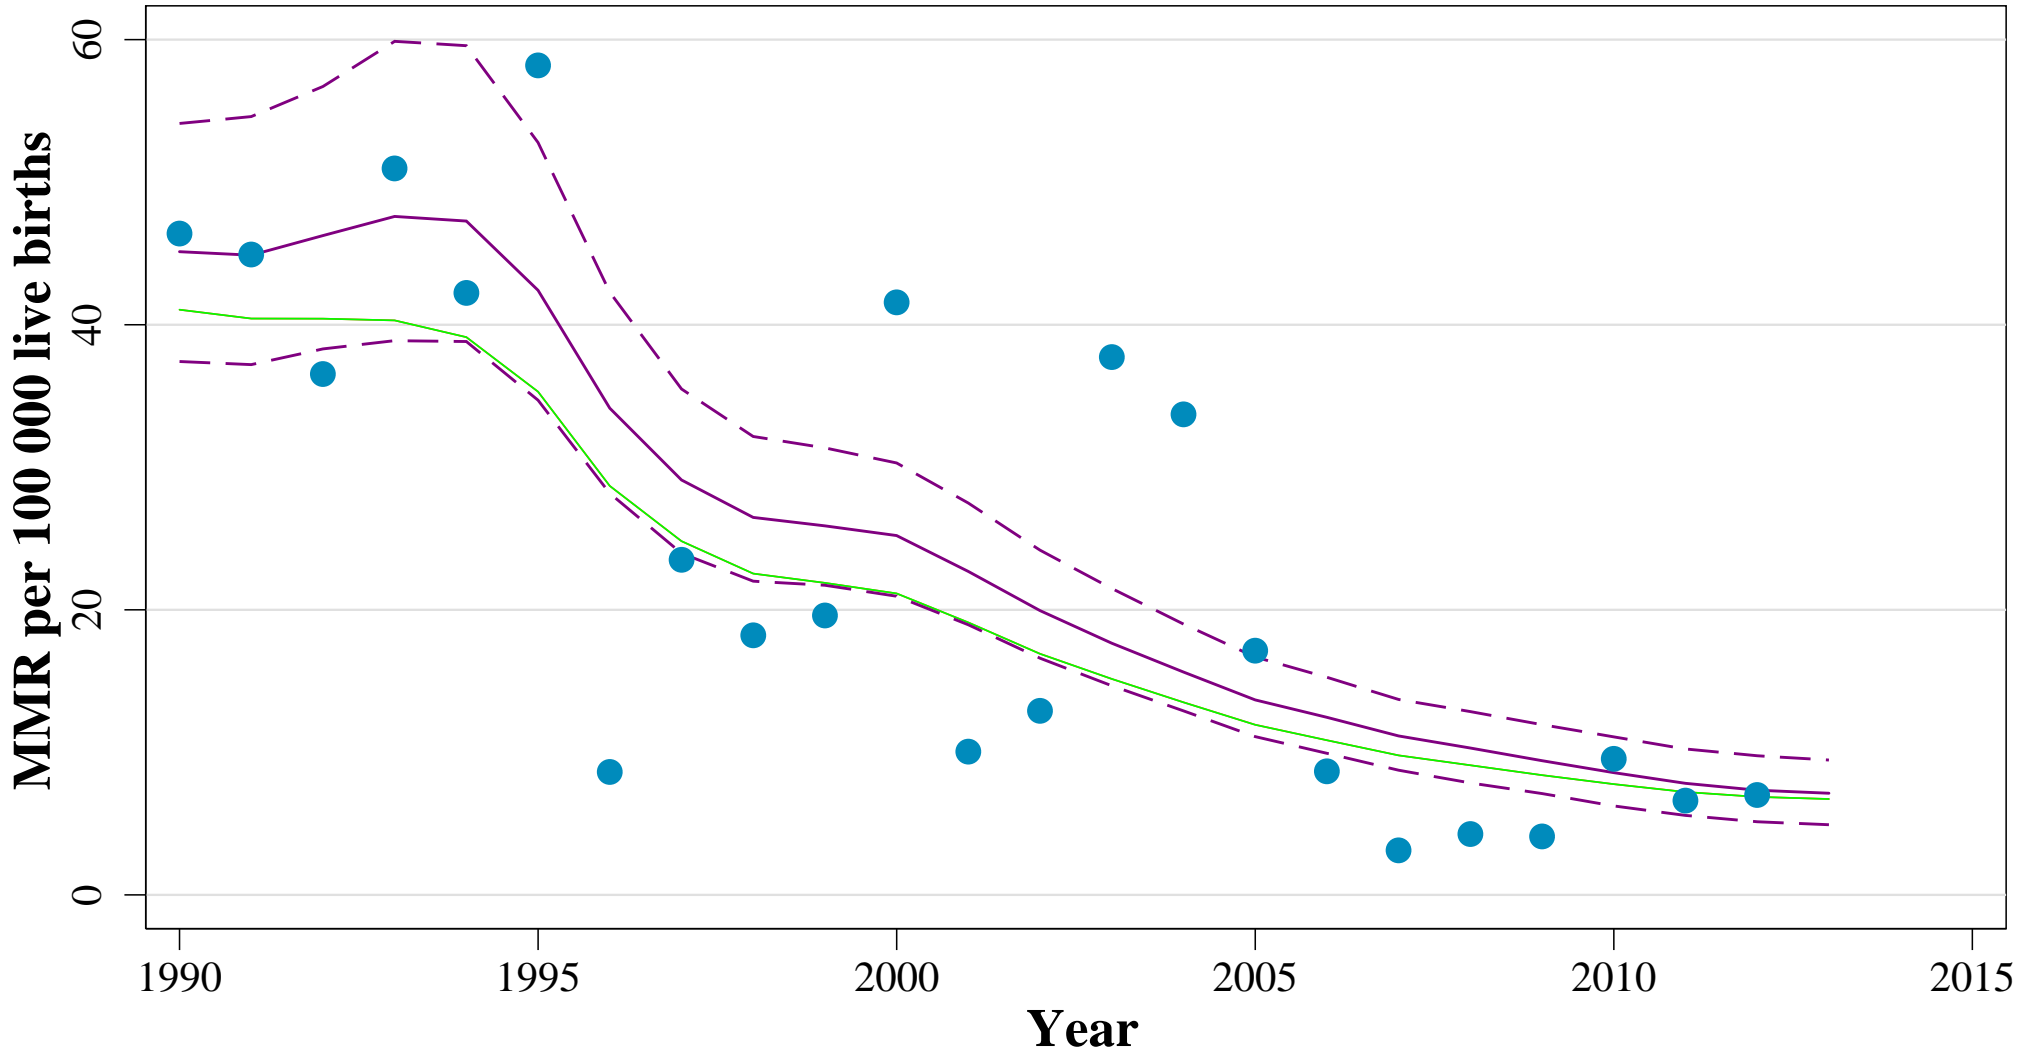

# Ethiopia

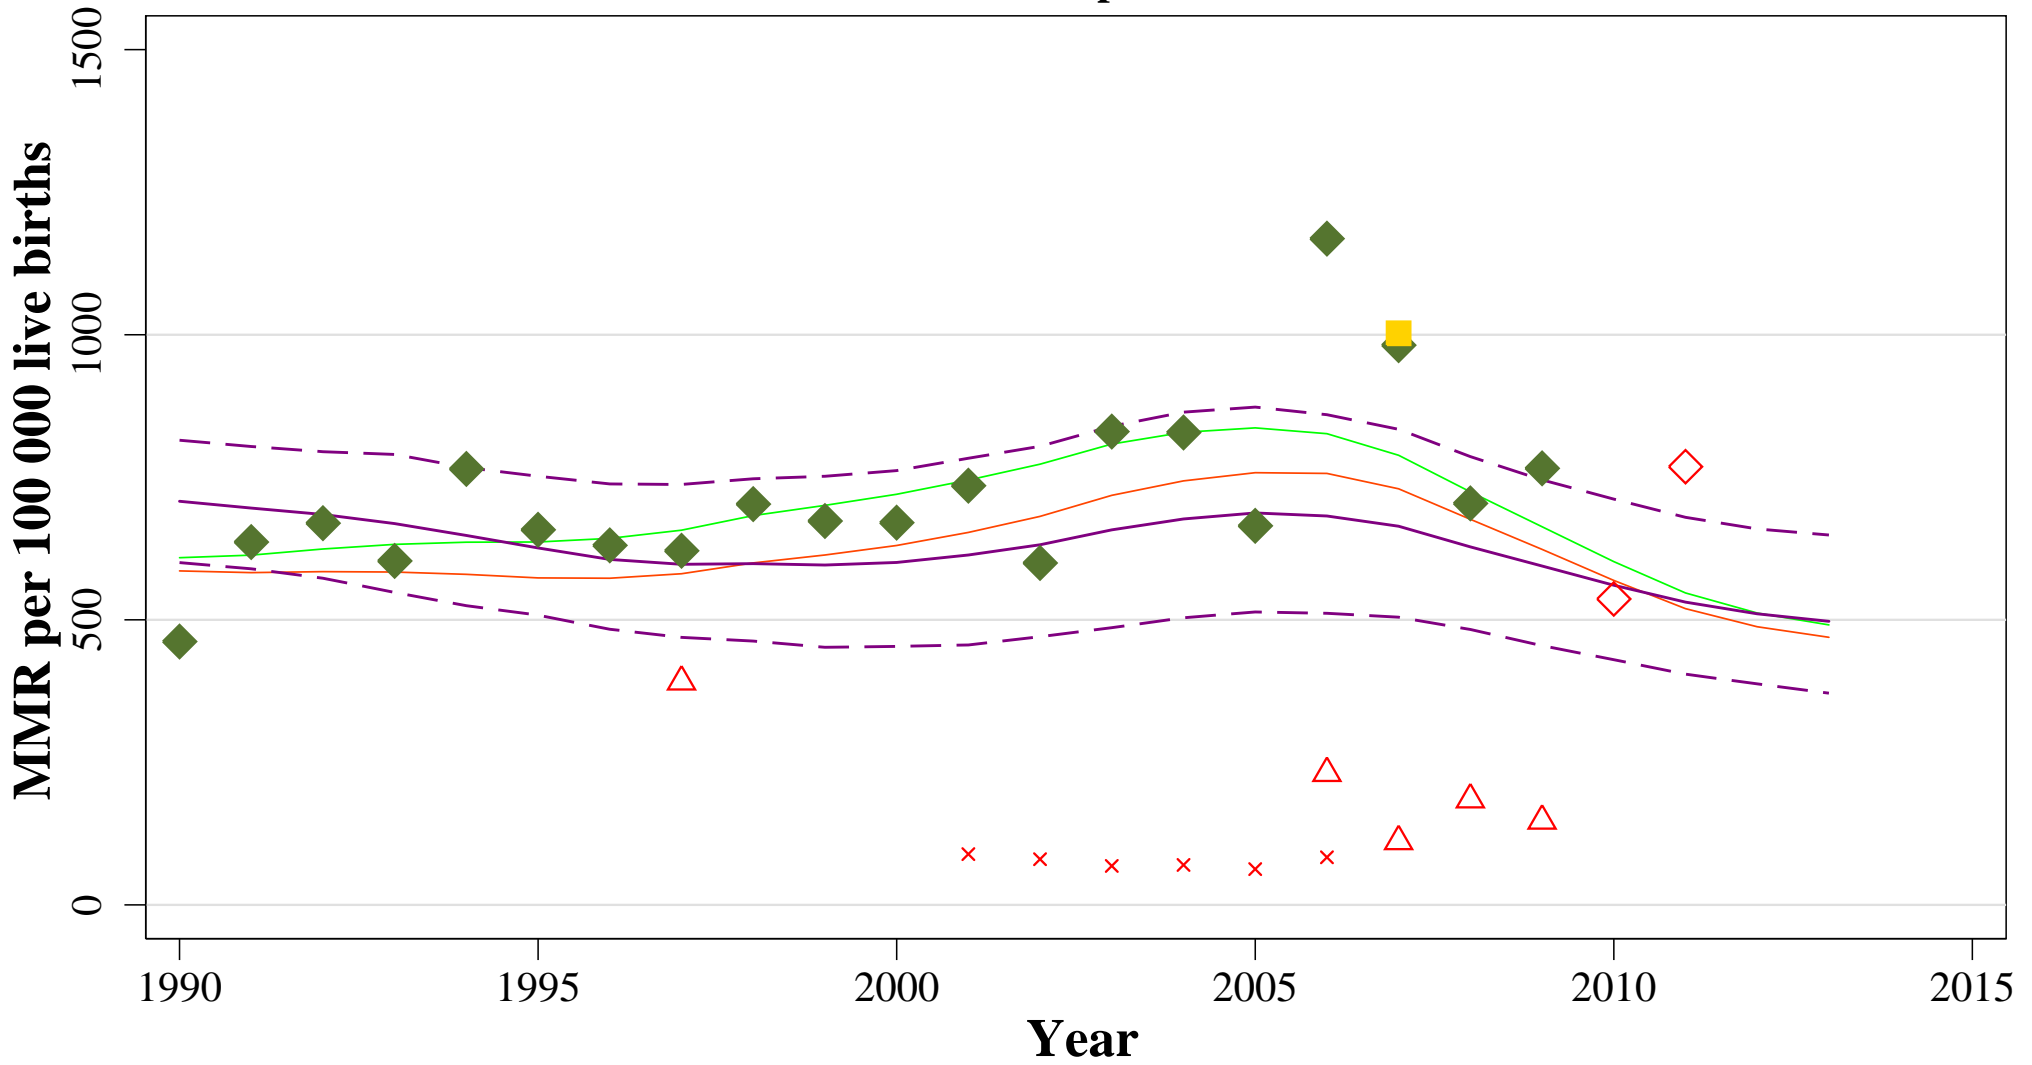

# Fiji

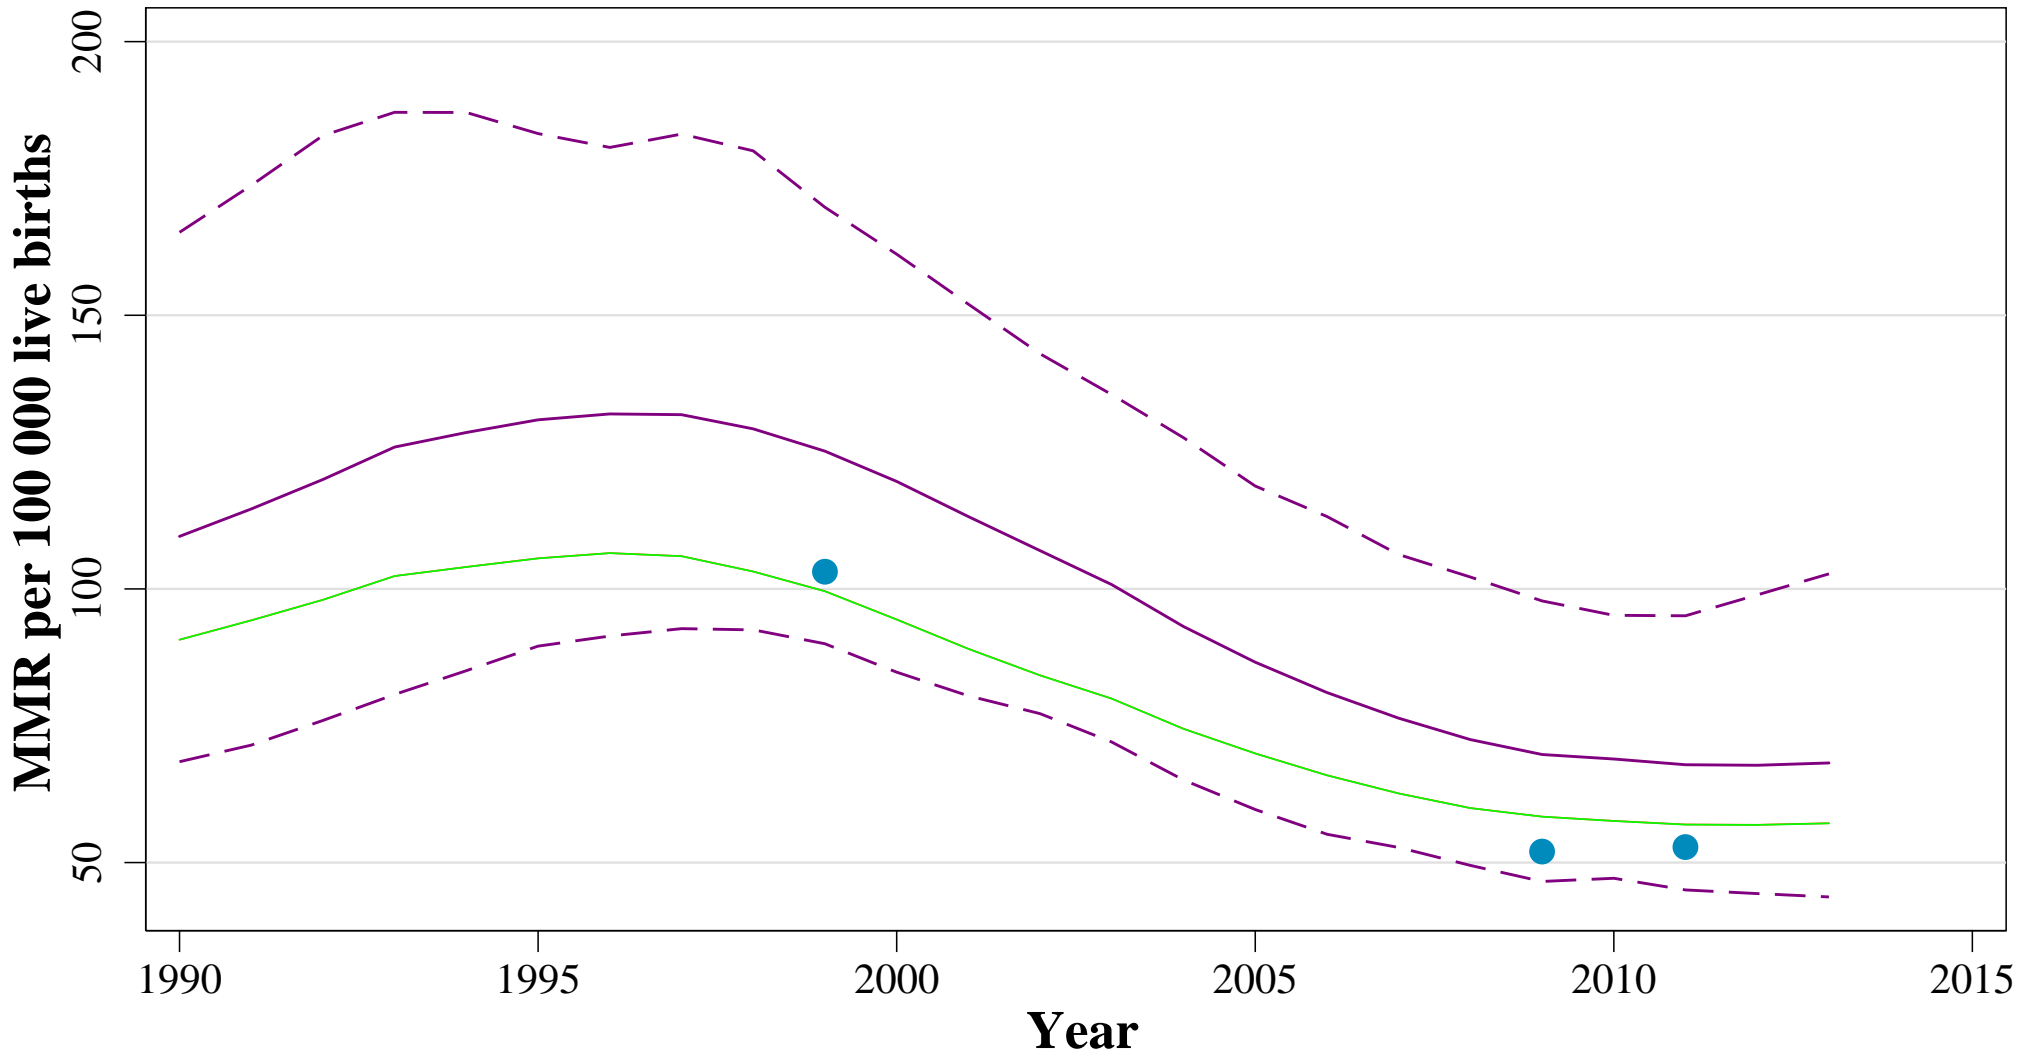

# Finland

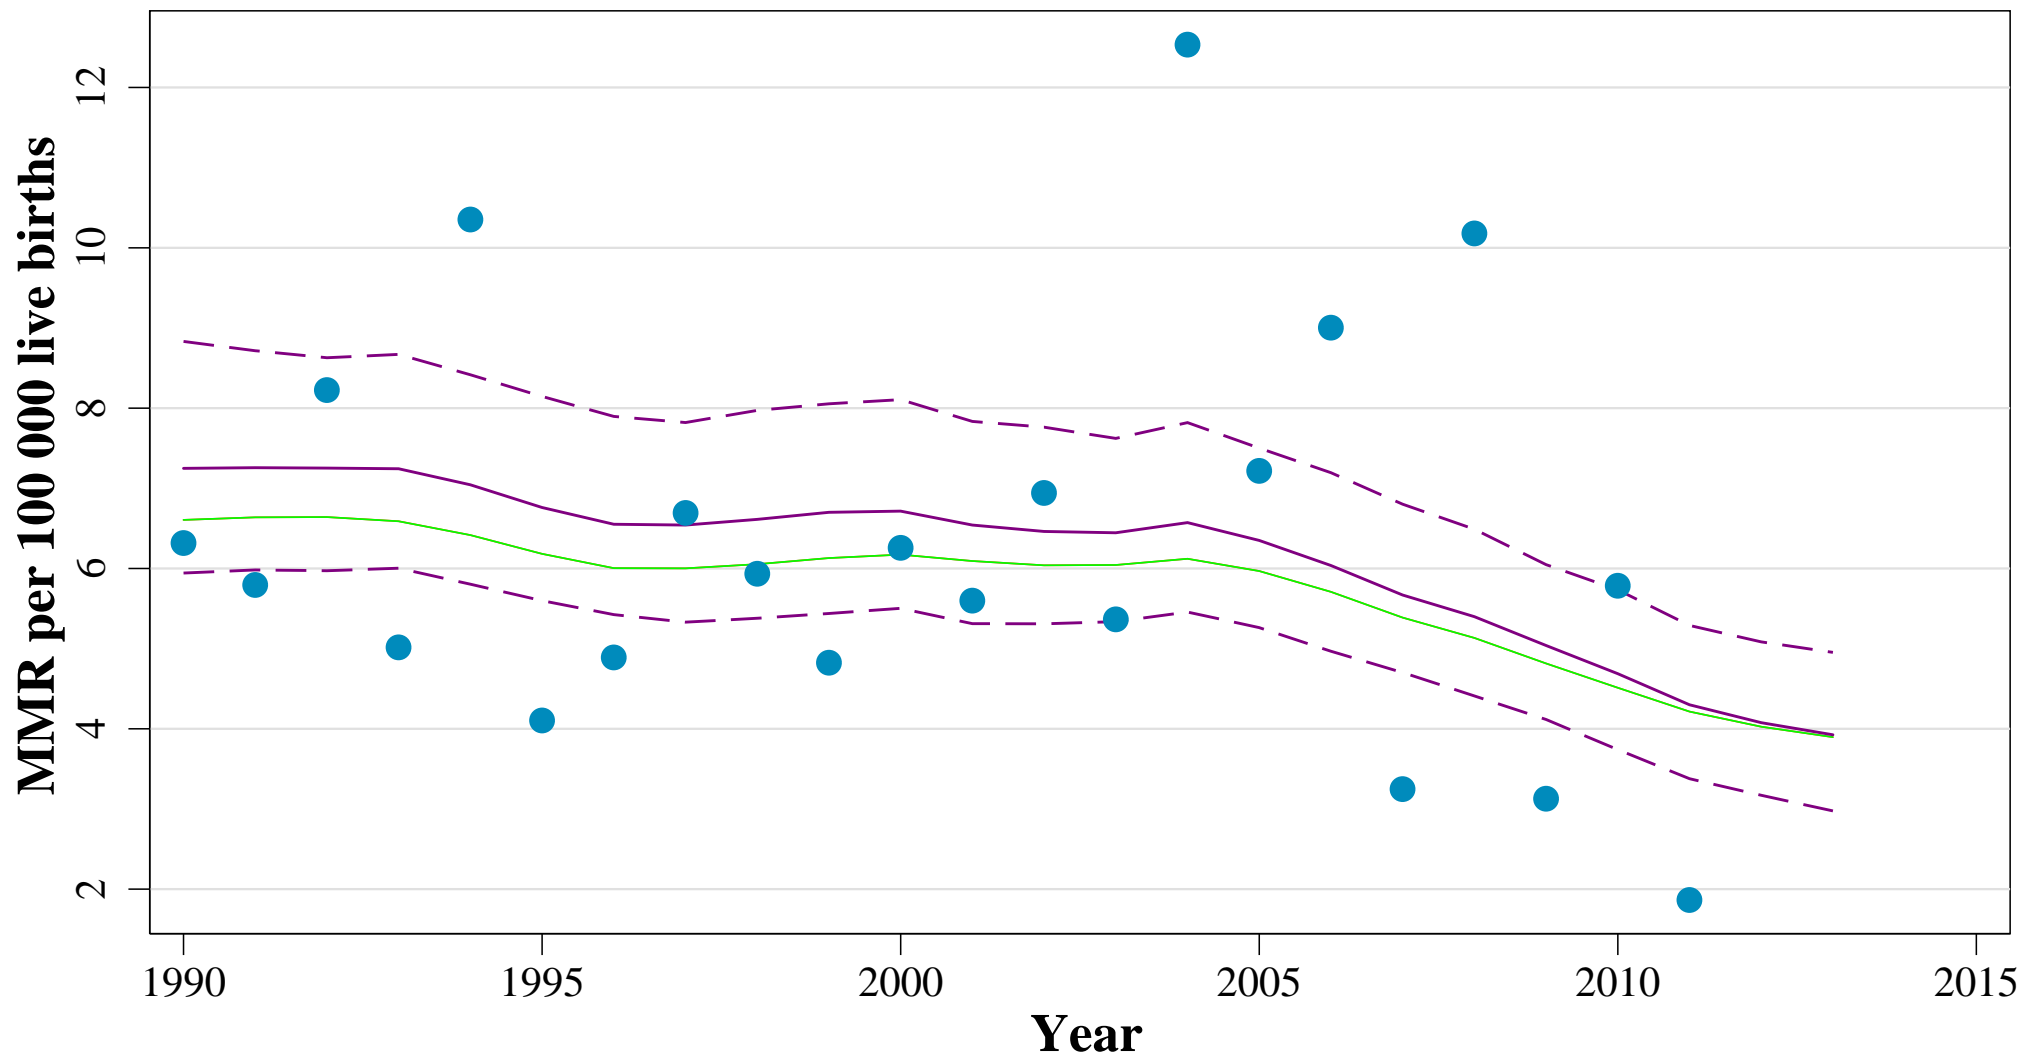

# France

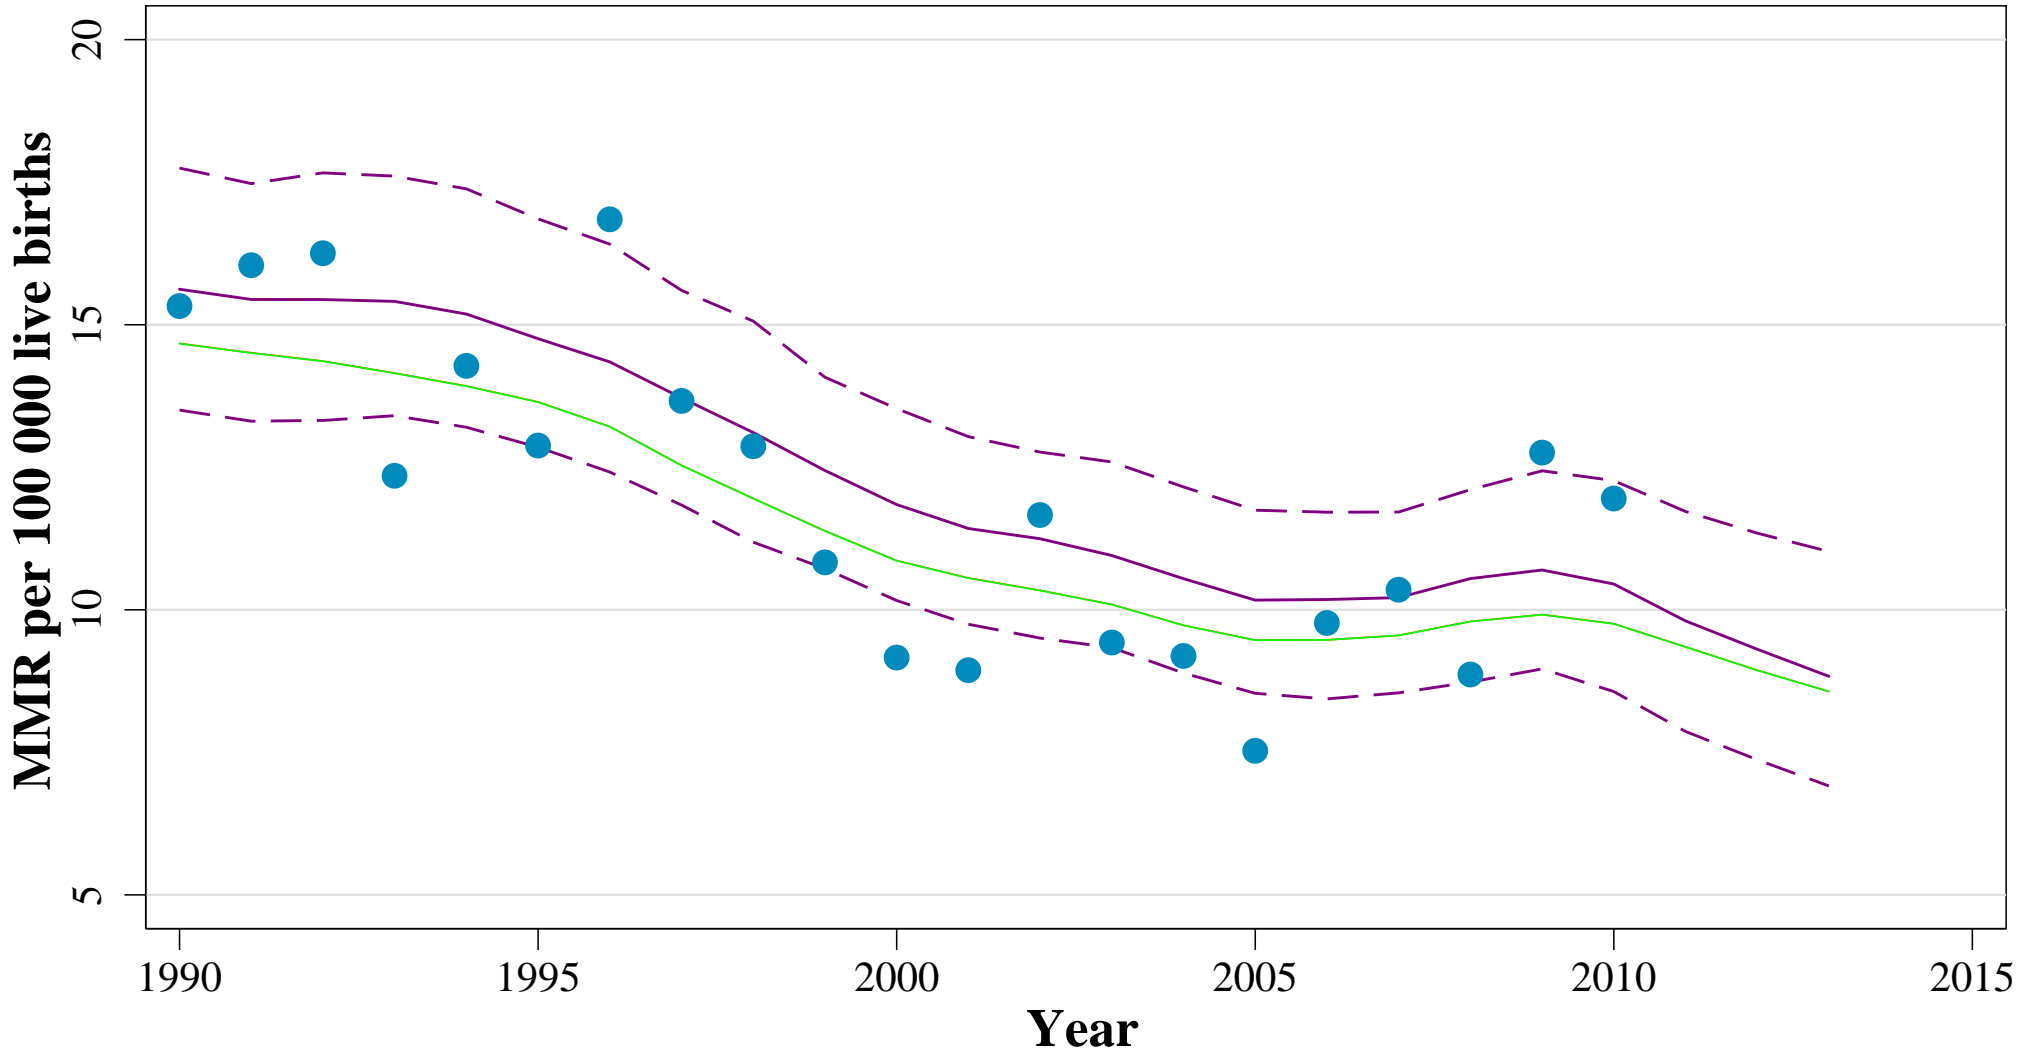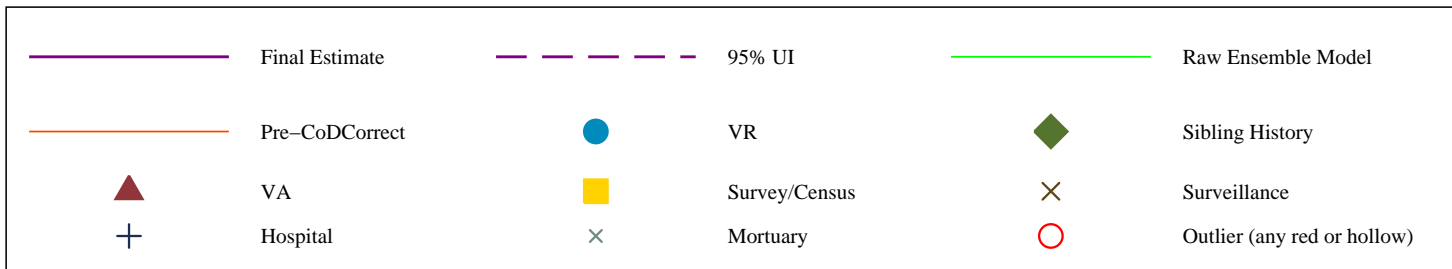

# Gabon

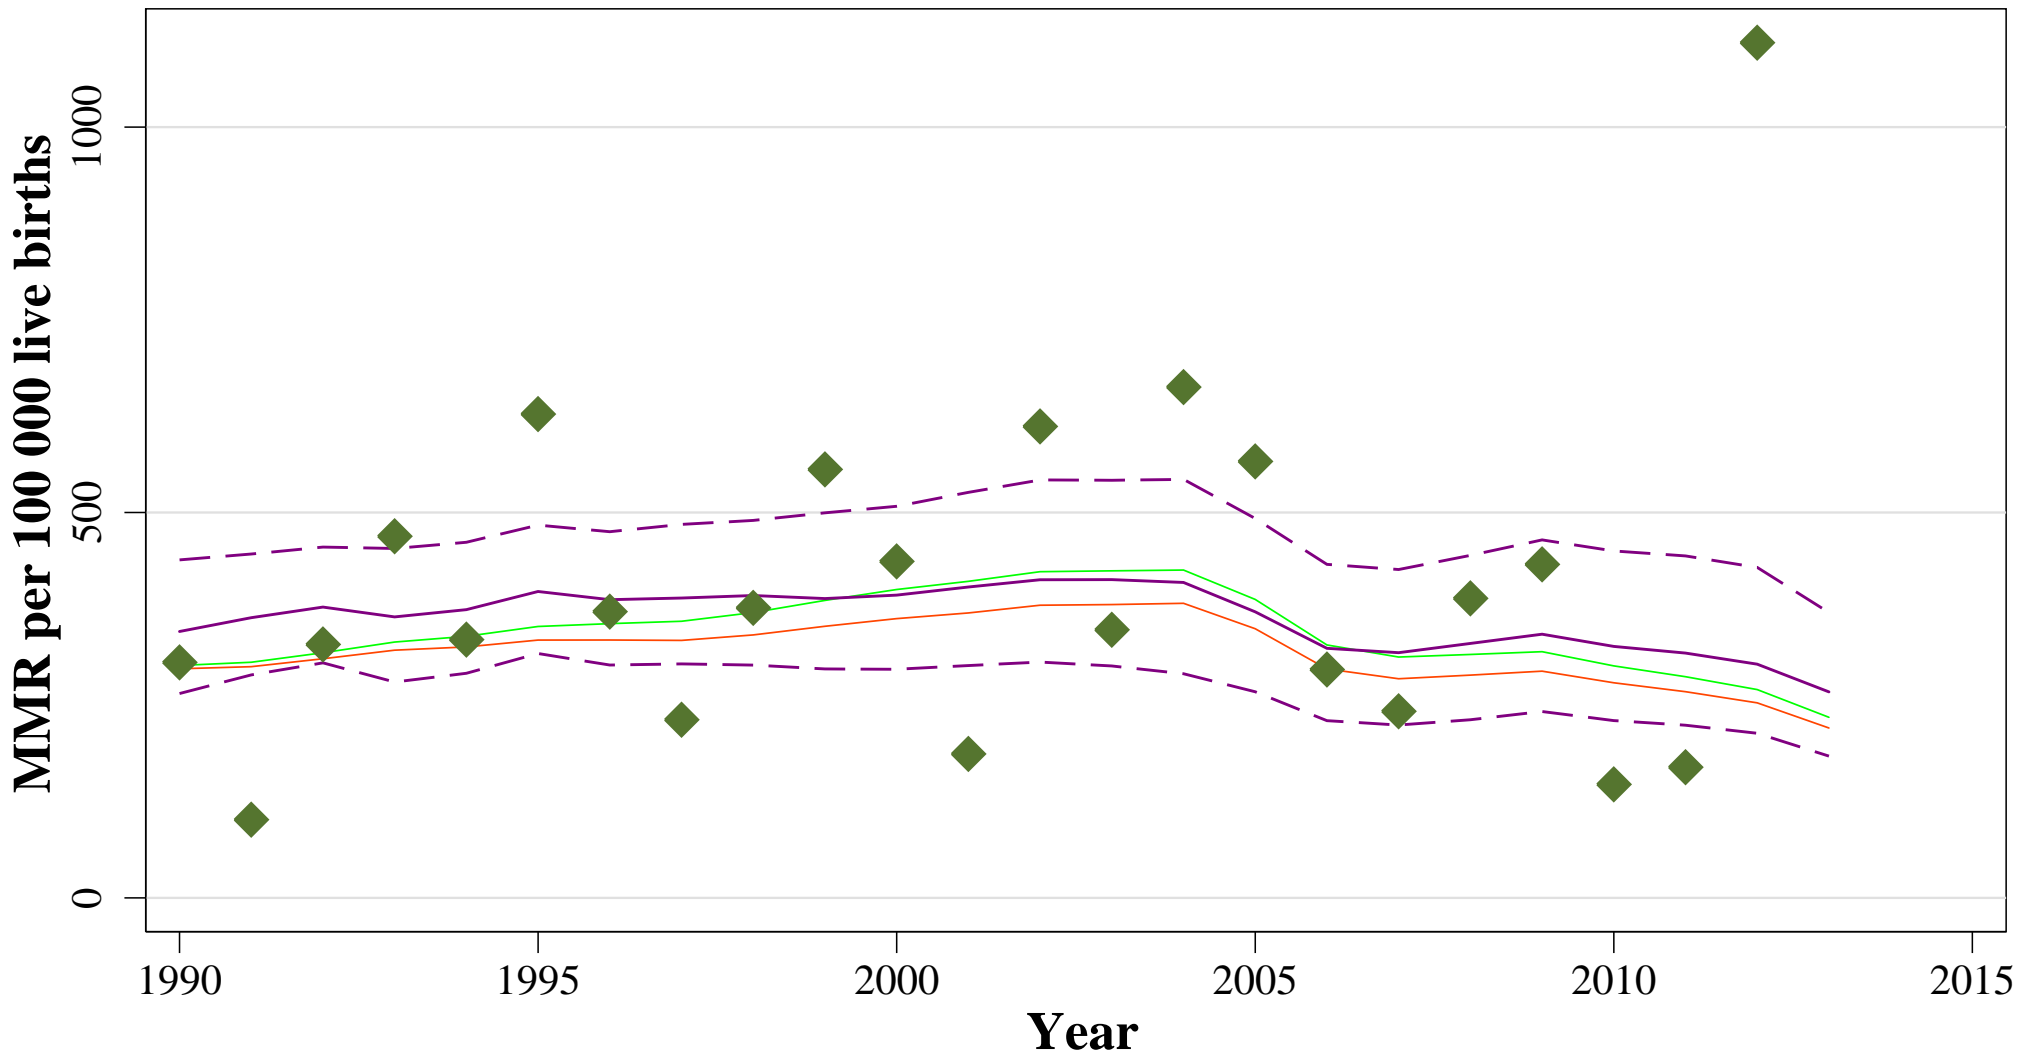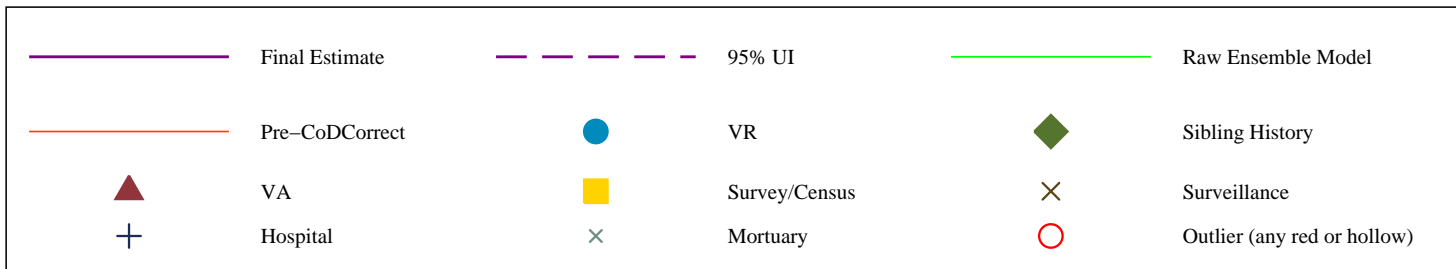

# Georgia

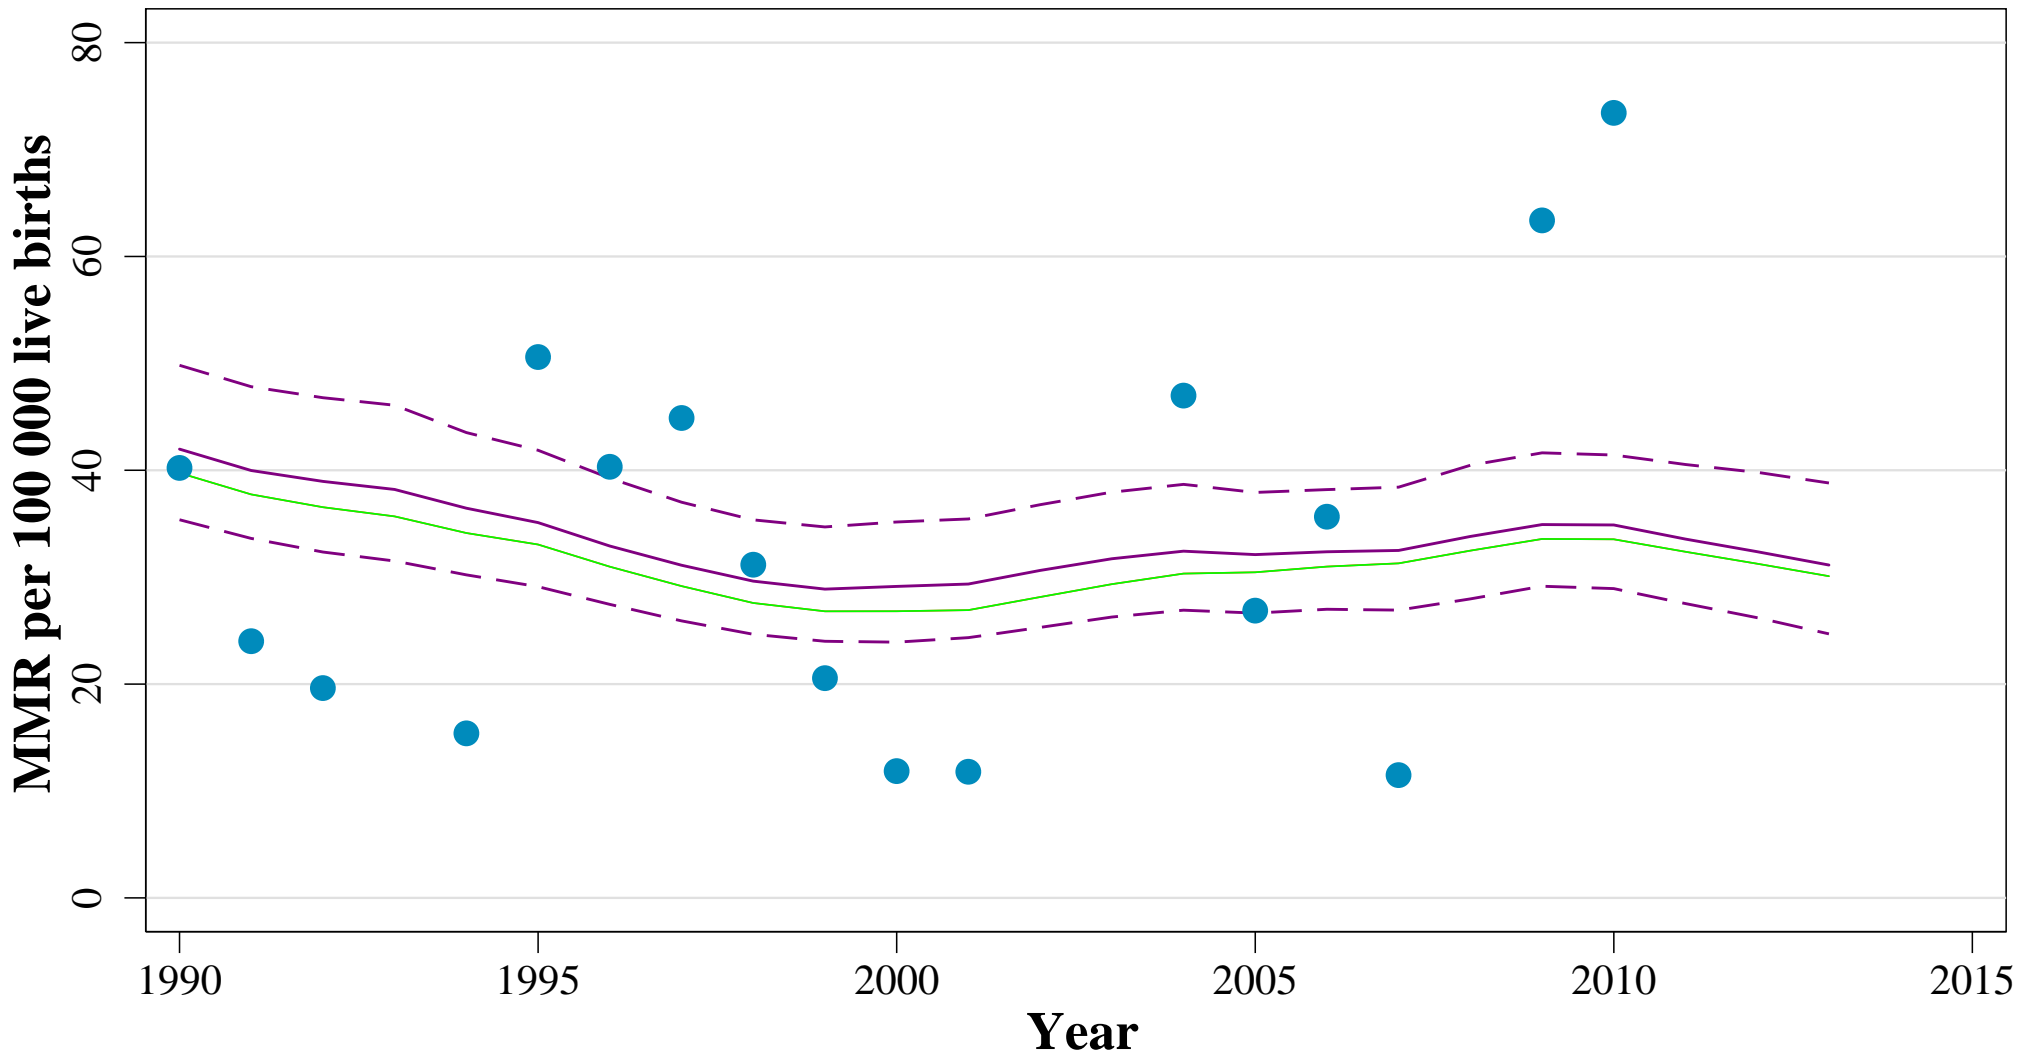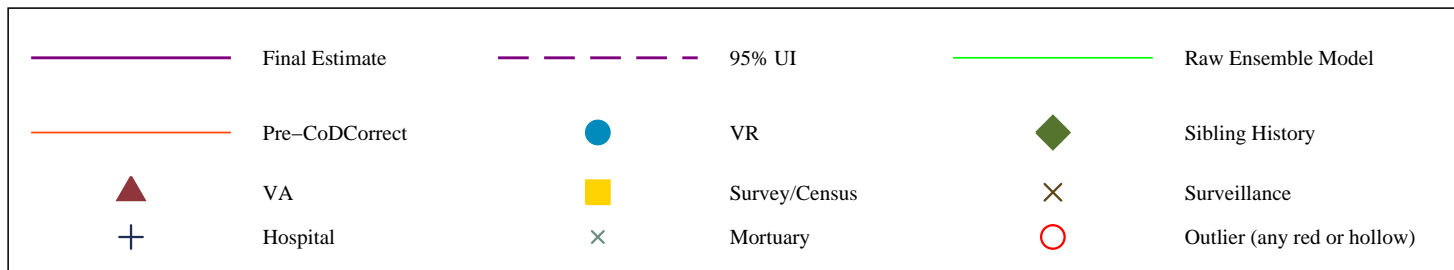

# Germany

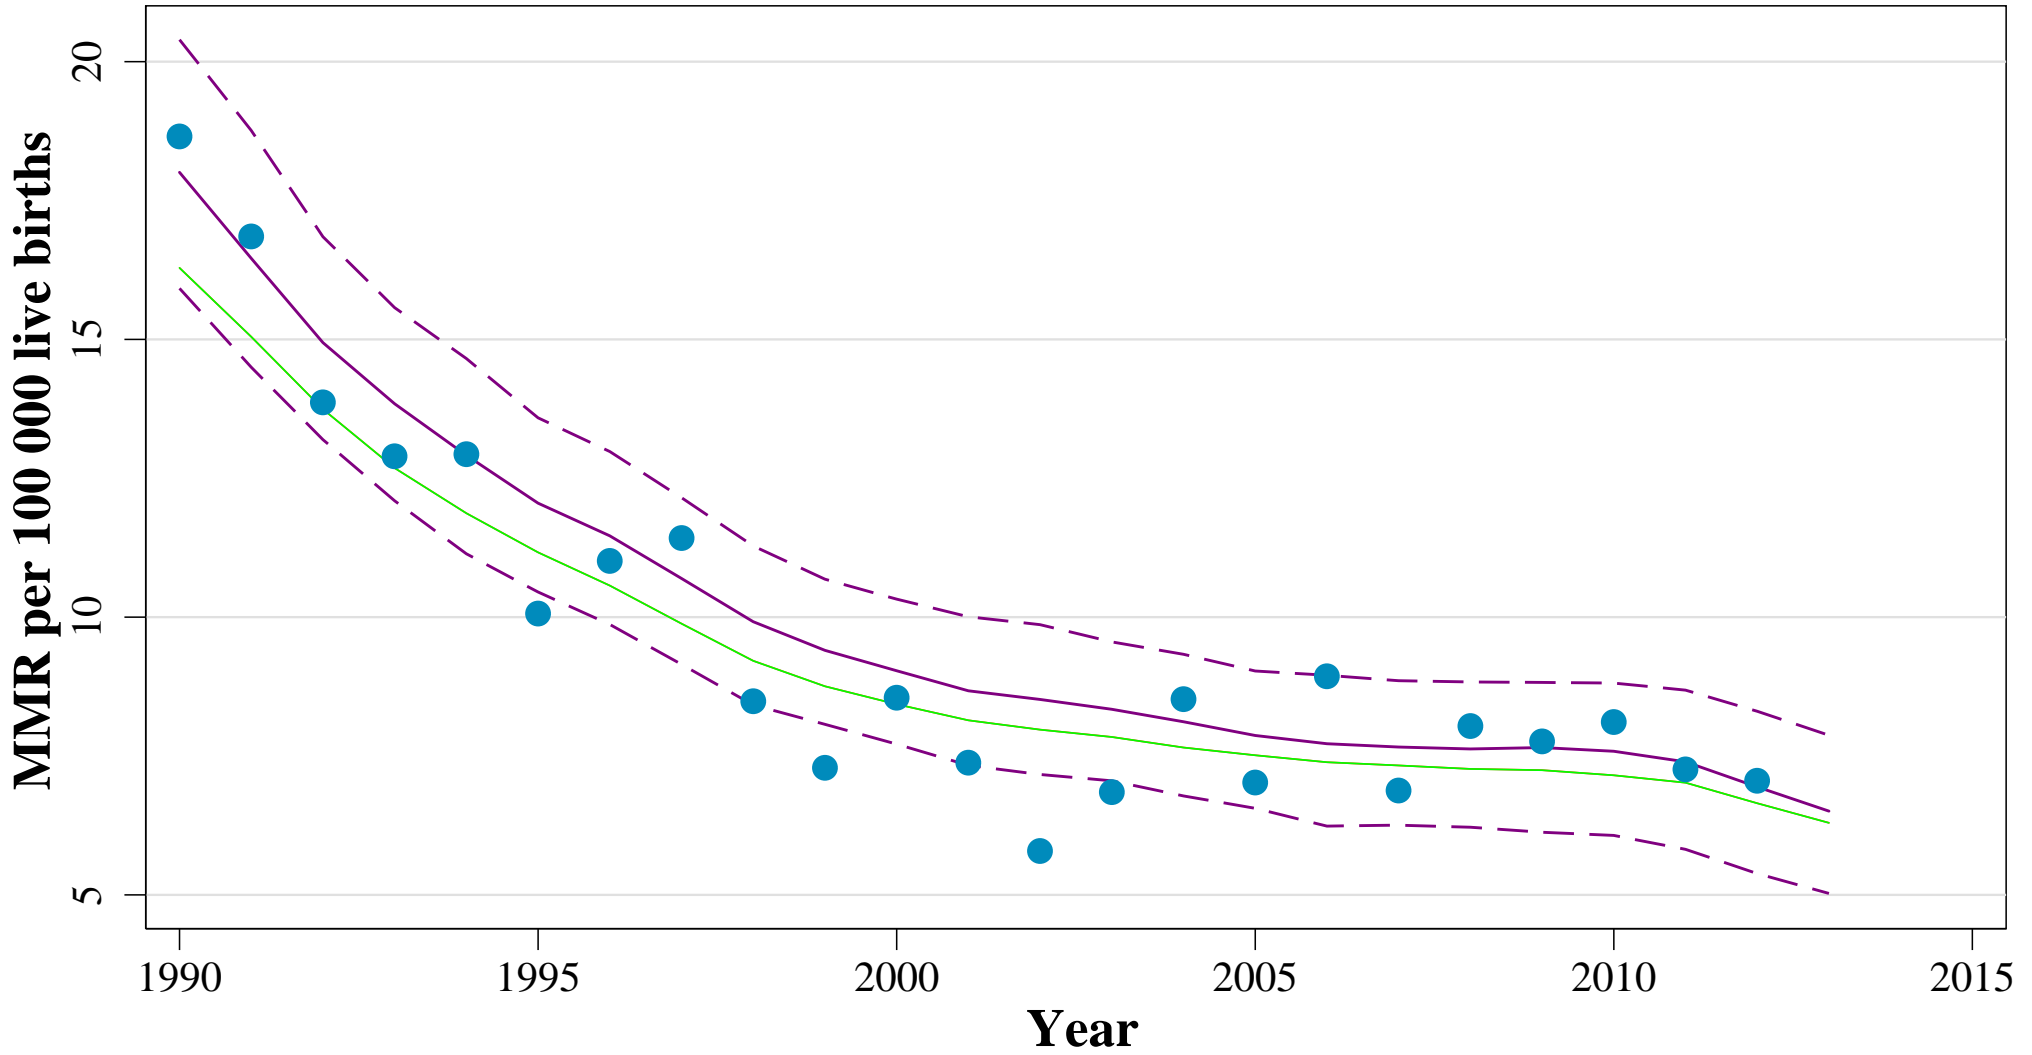



# Ghana

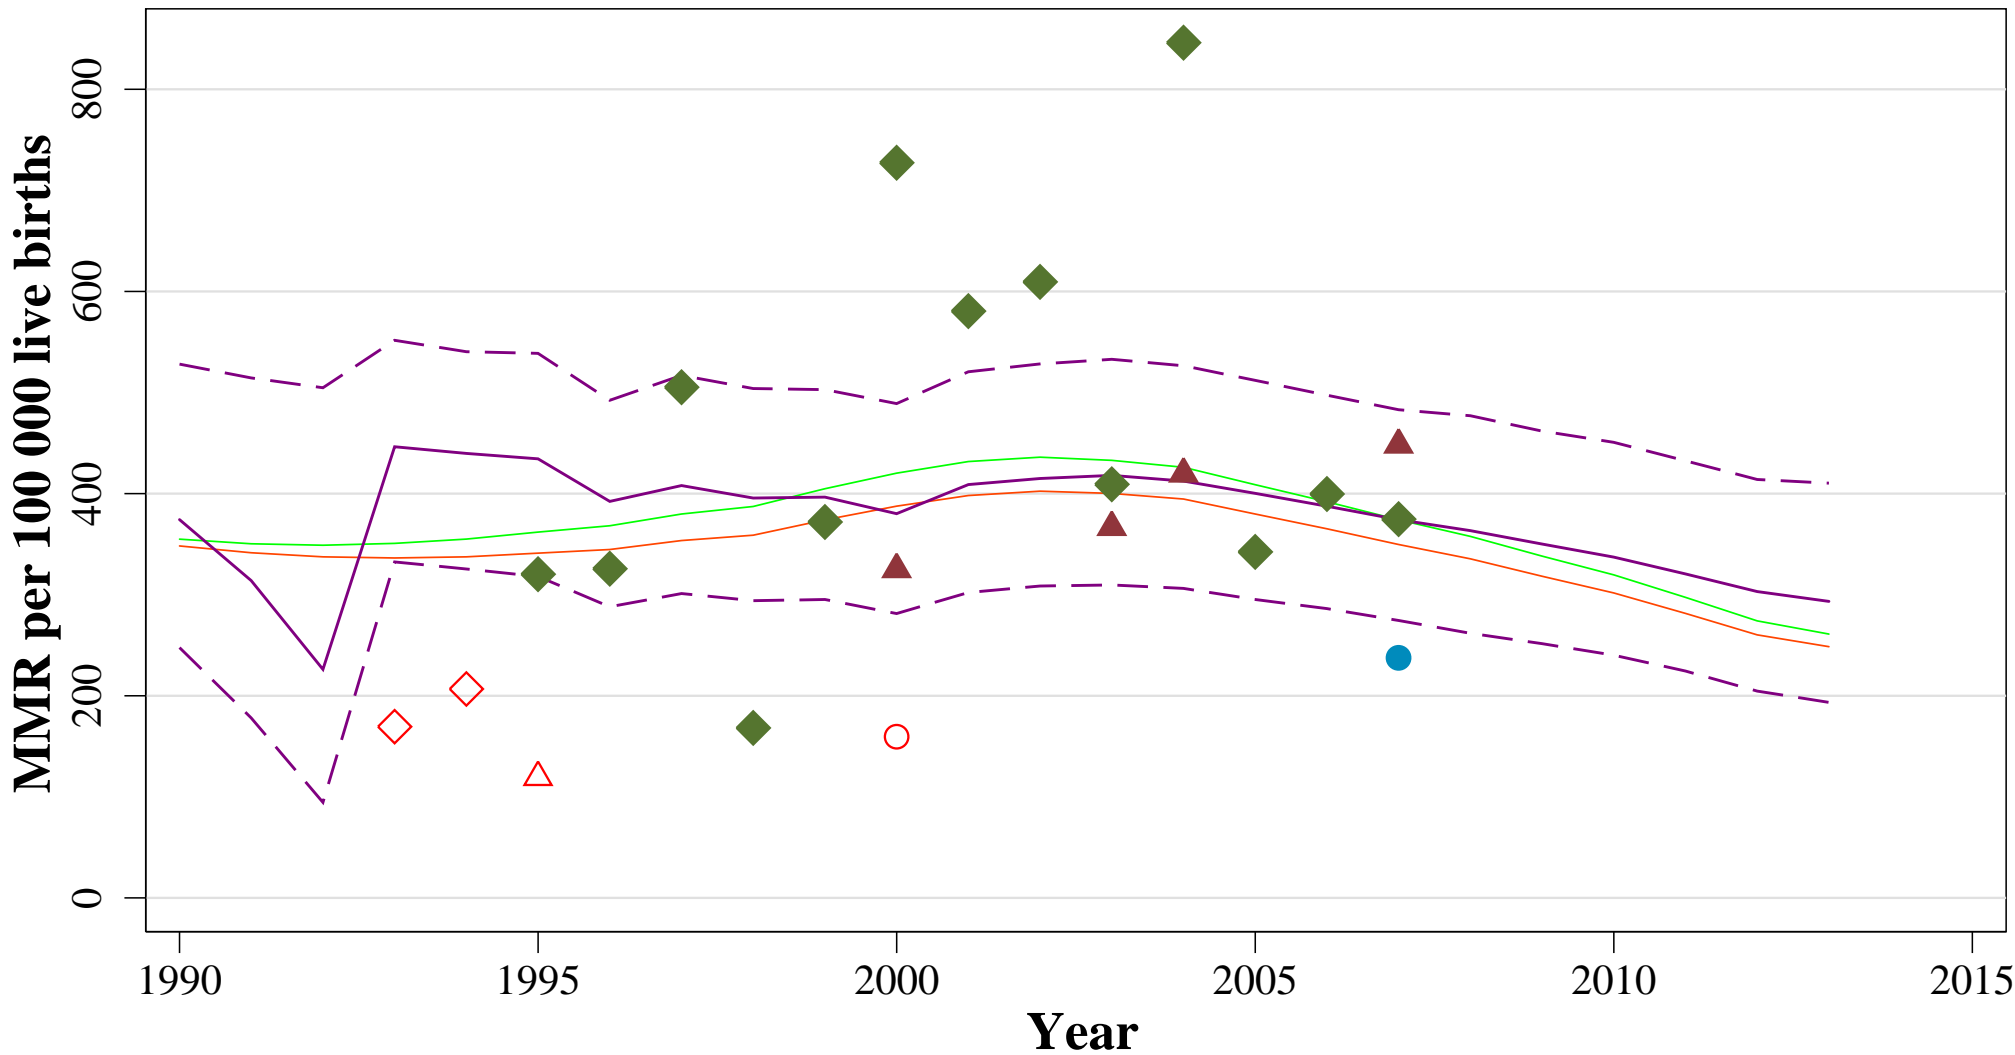

# Greece

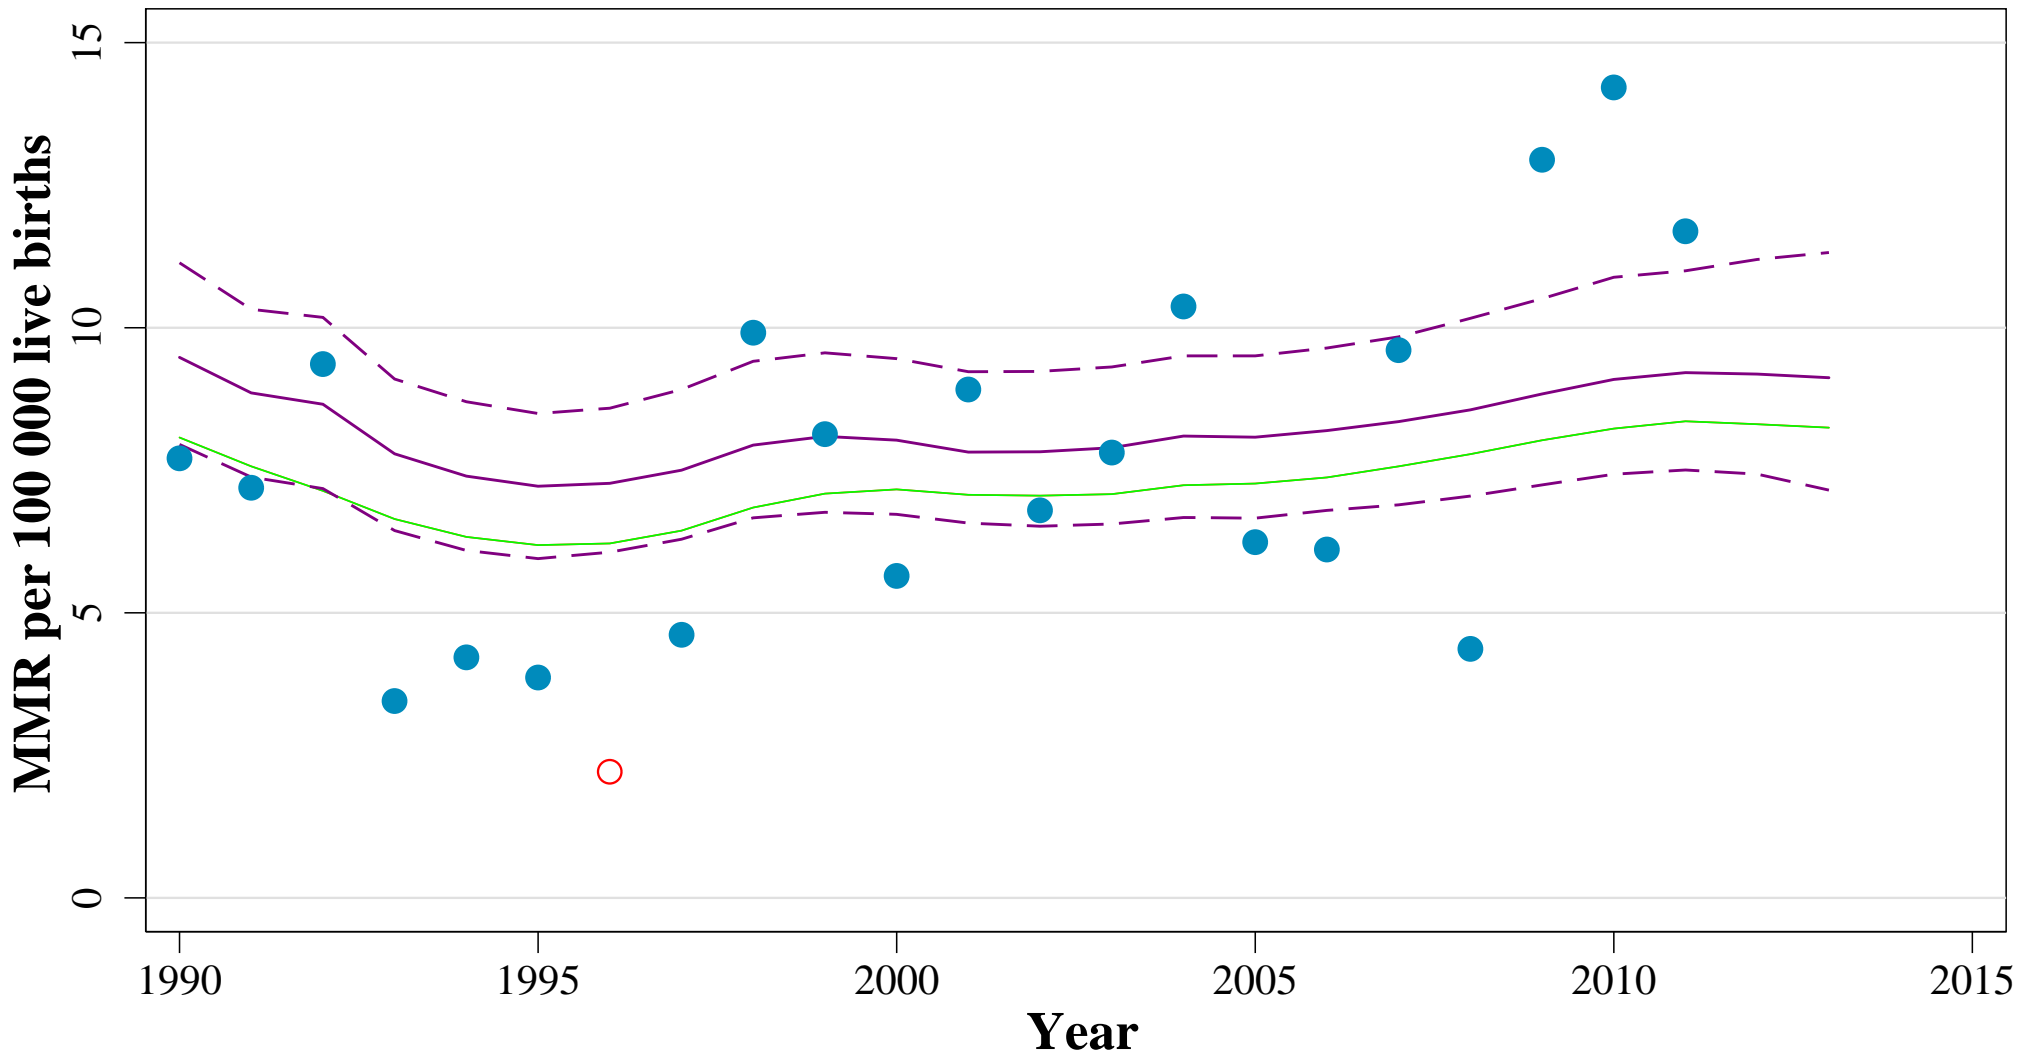

# Grenada

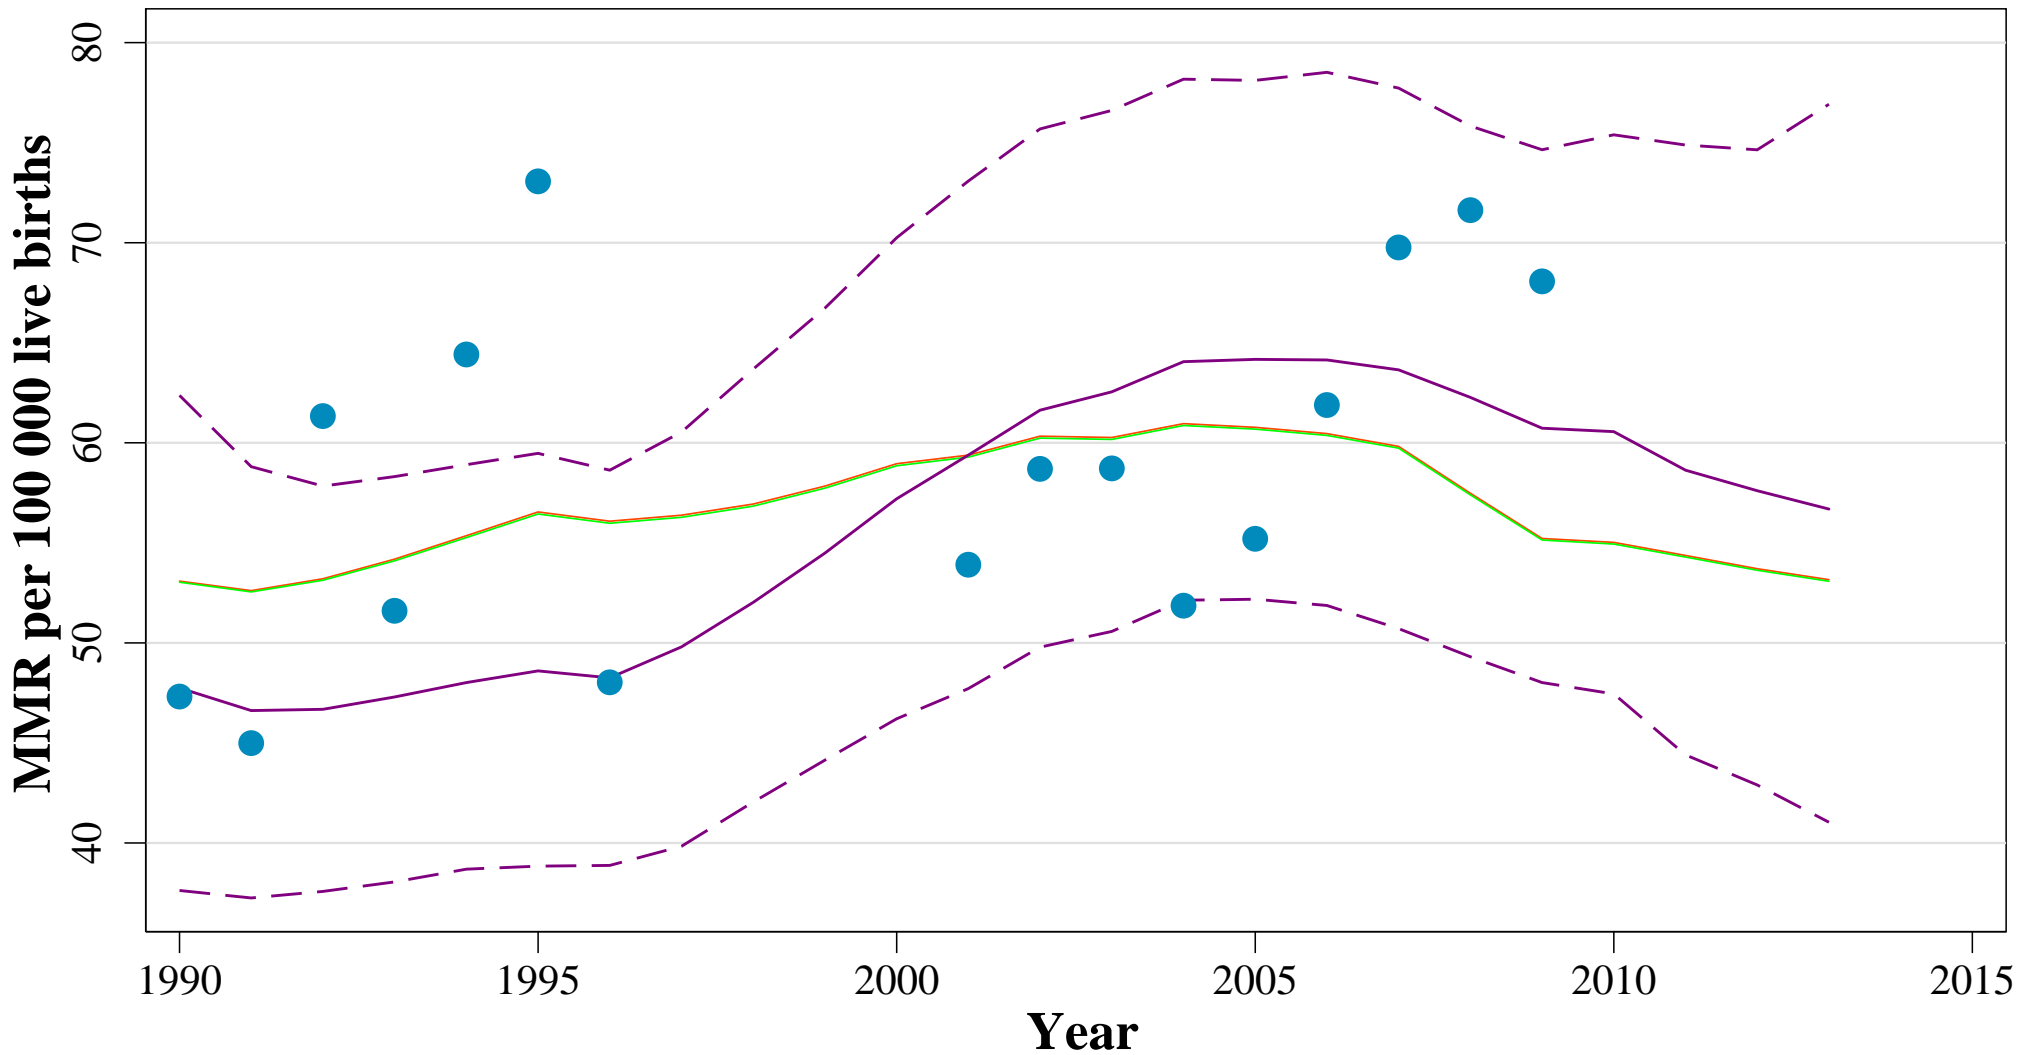

# Guatemala

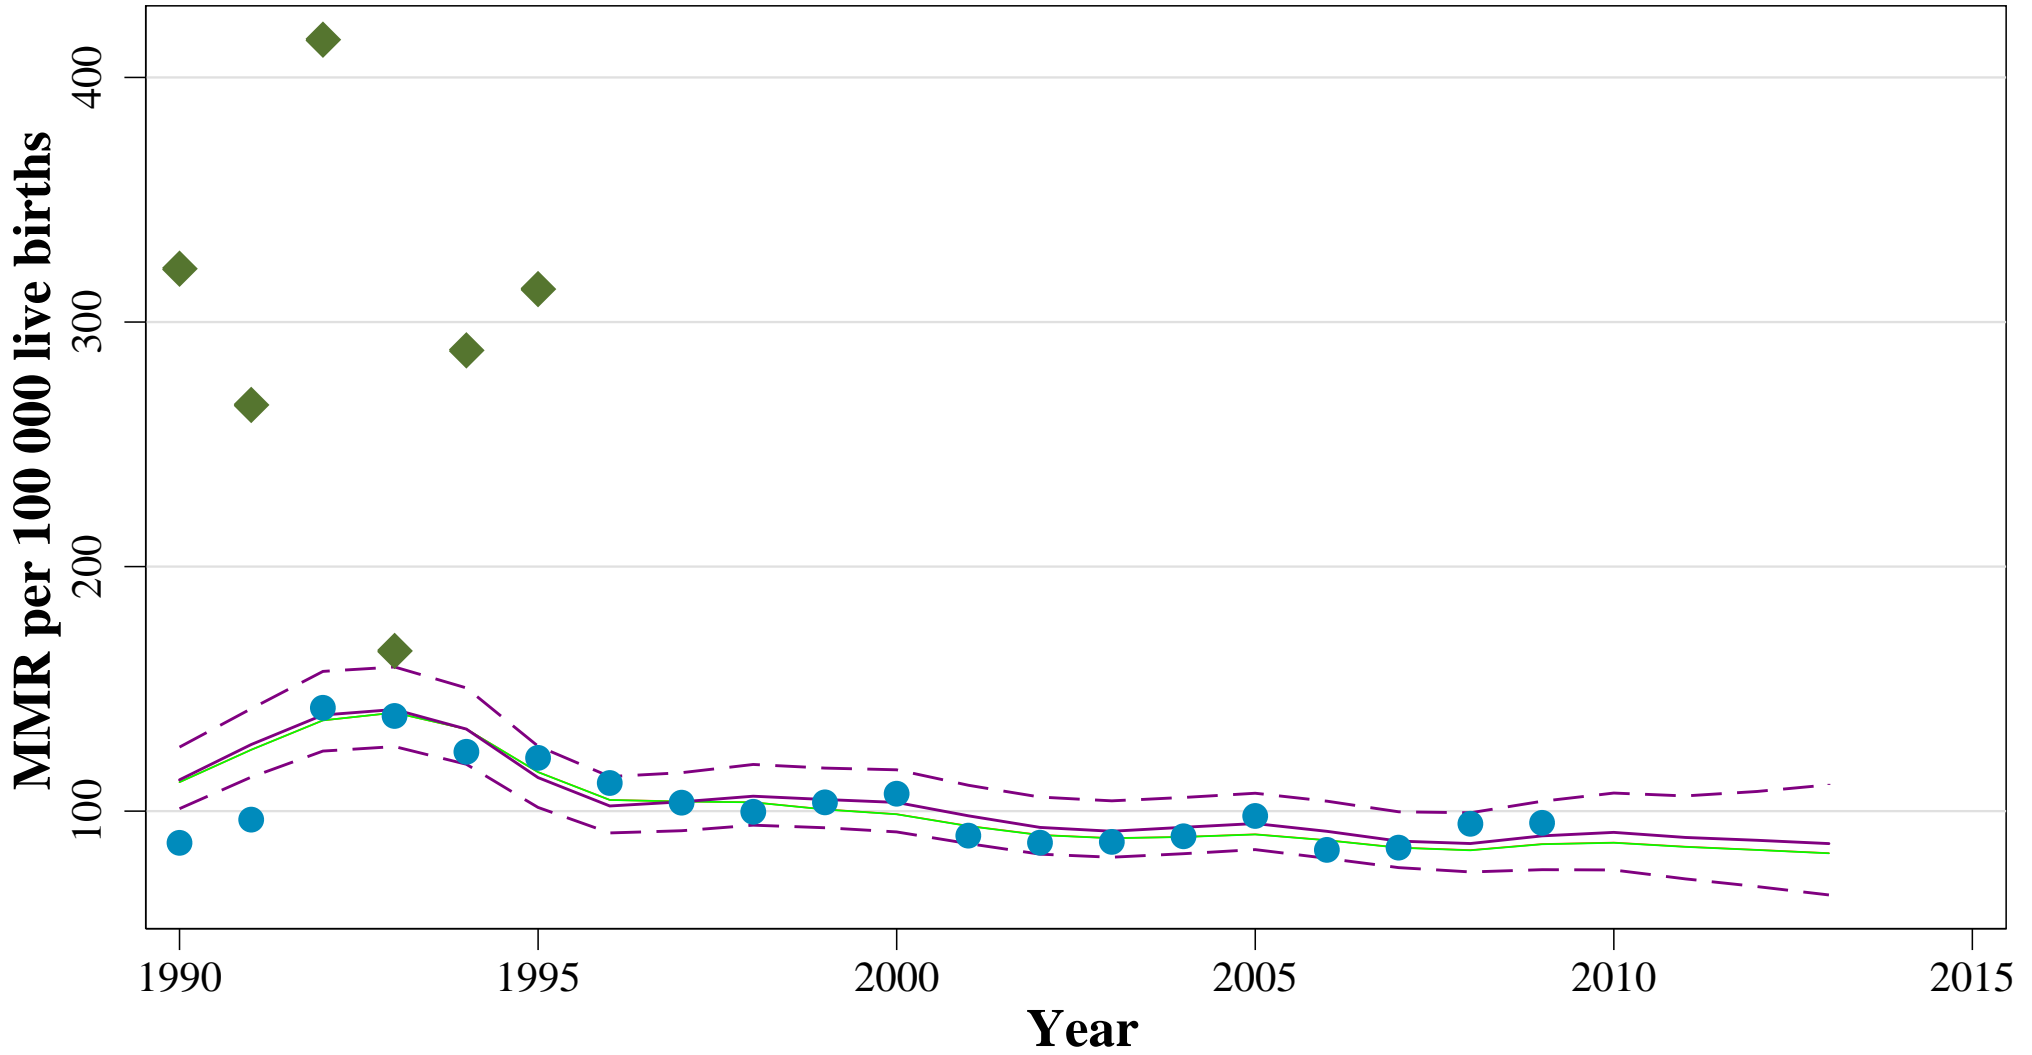

# Guinea

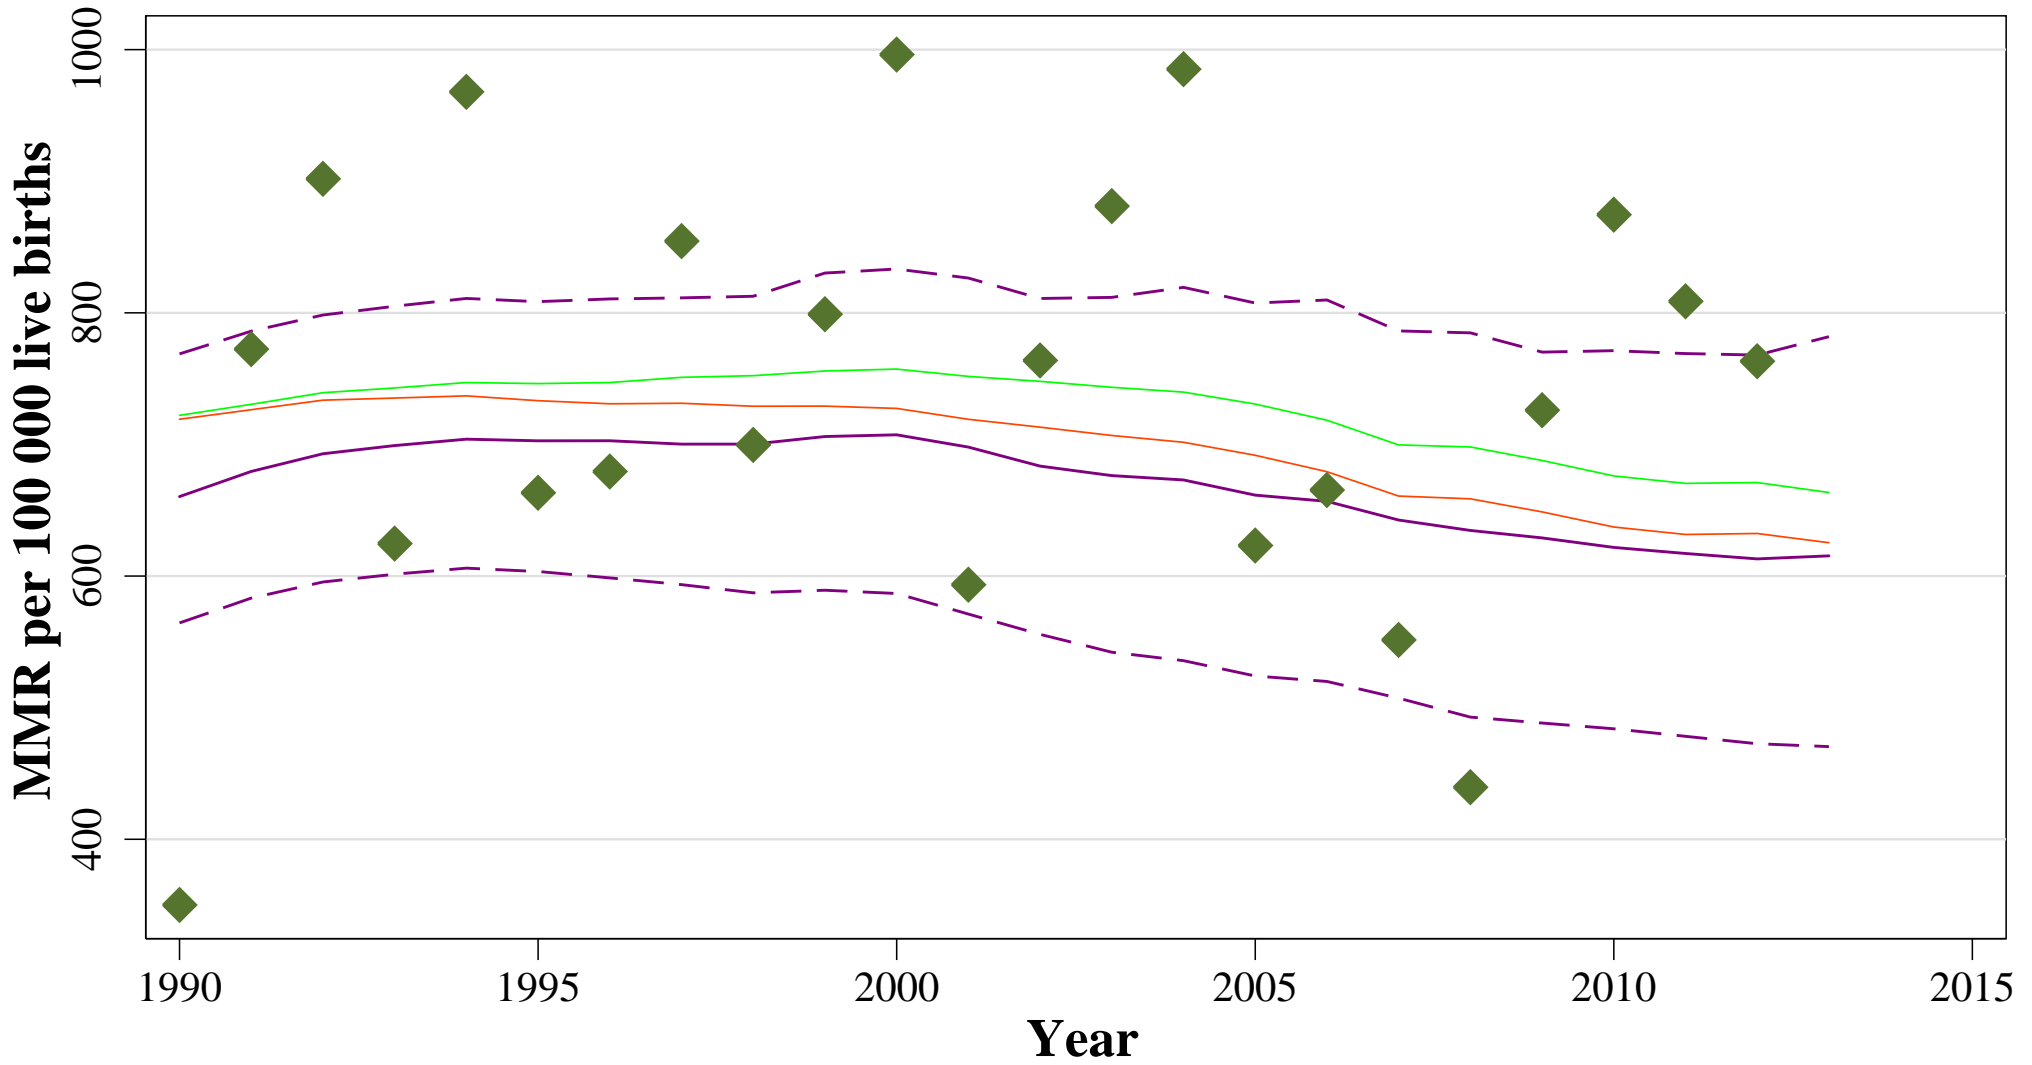

# Guinea-Bissau

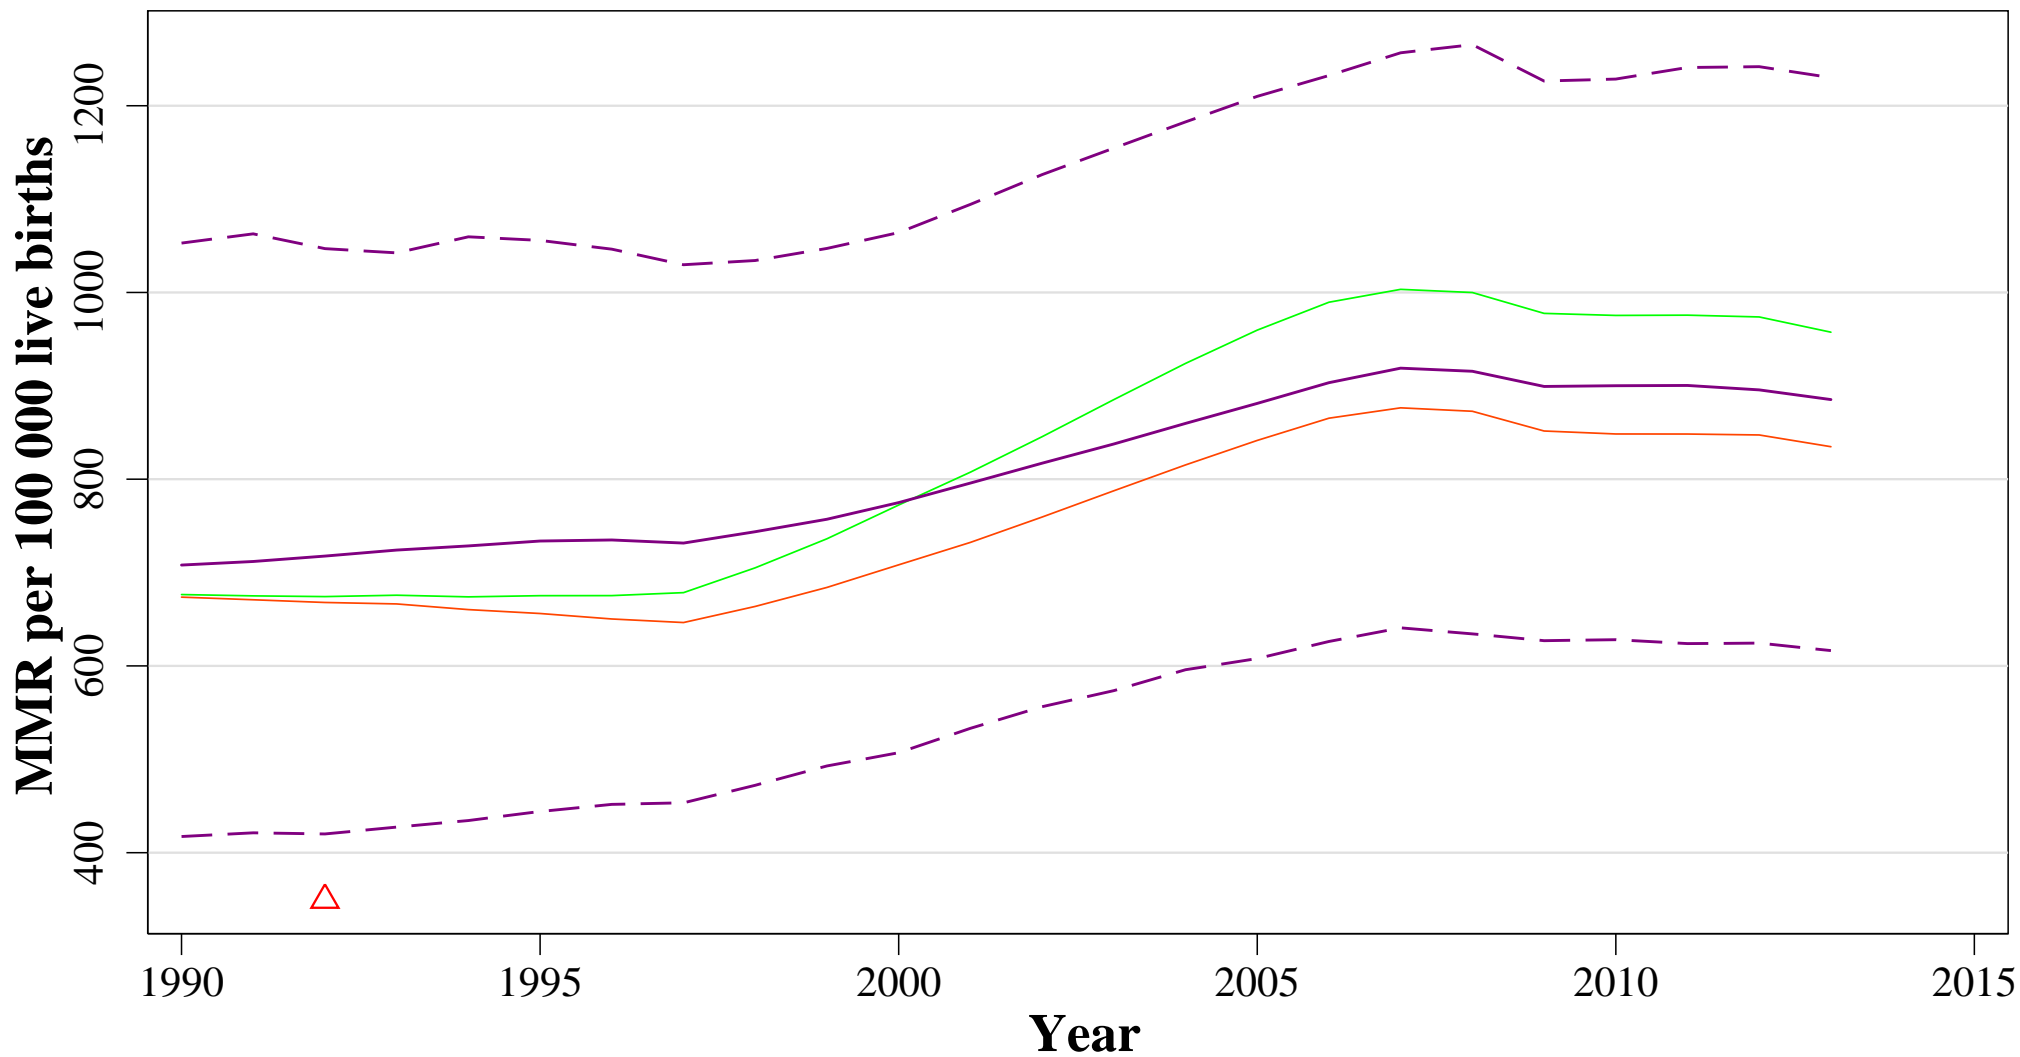

# Guyana

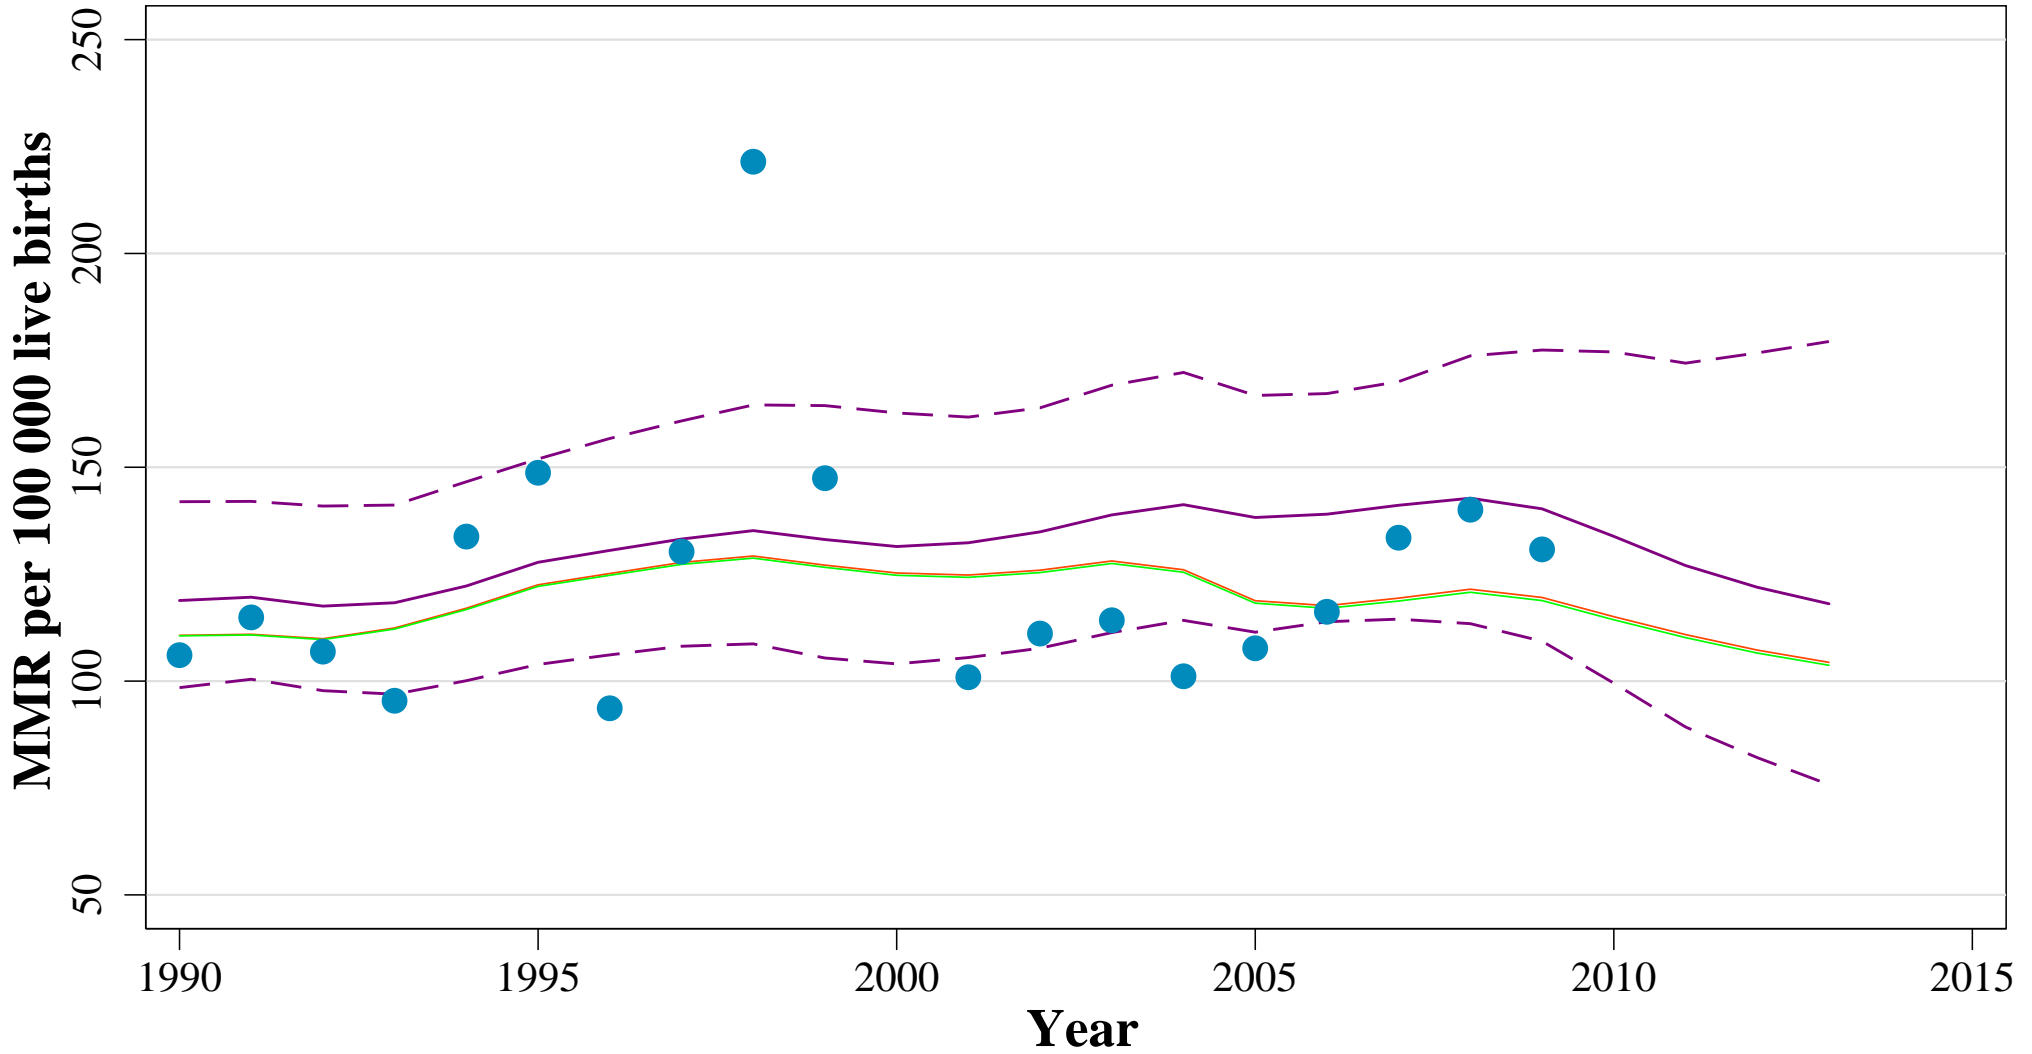

# Haiti

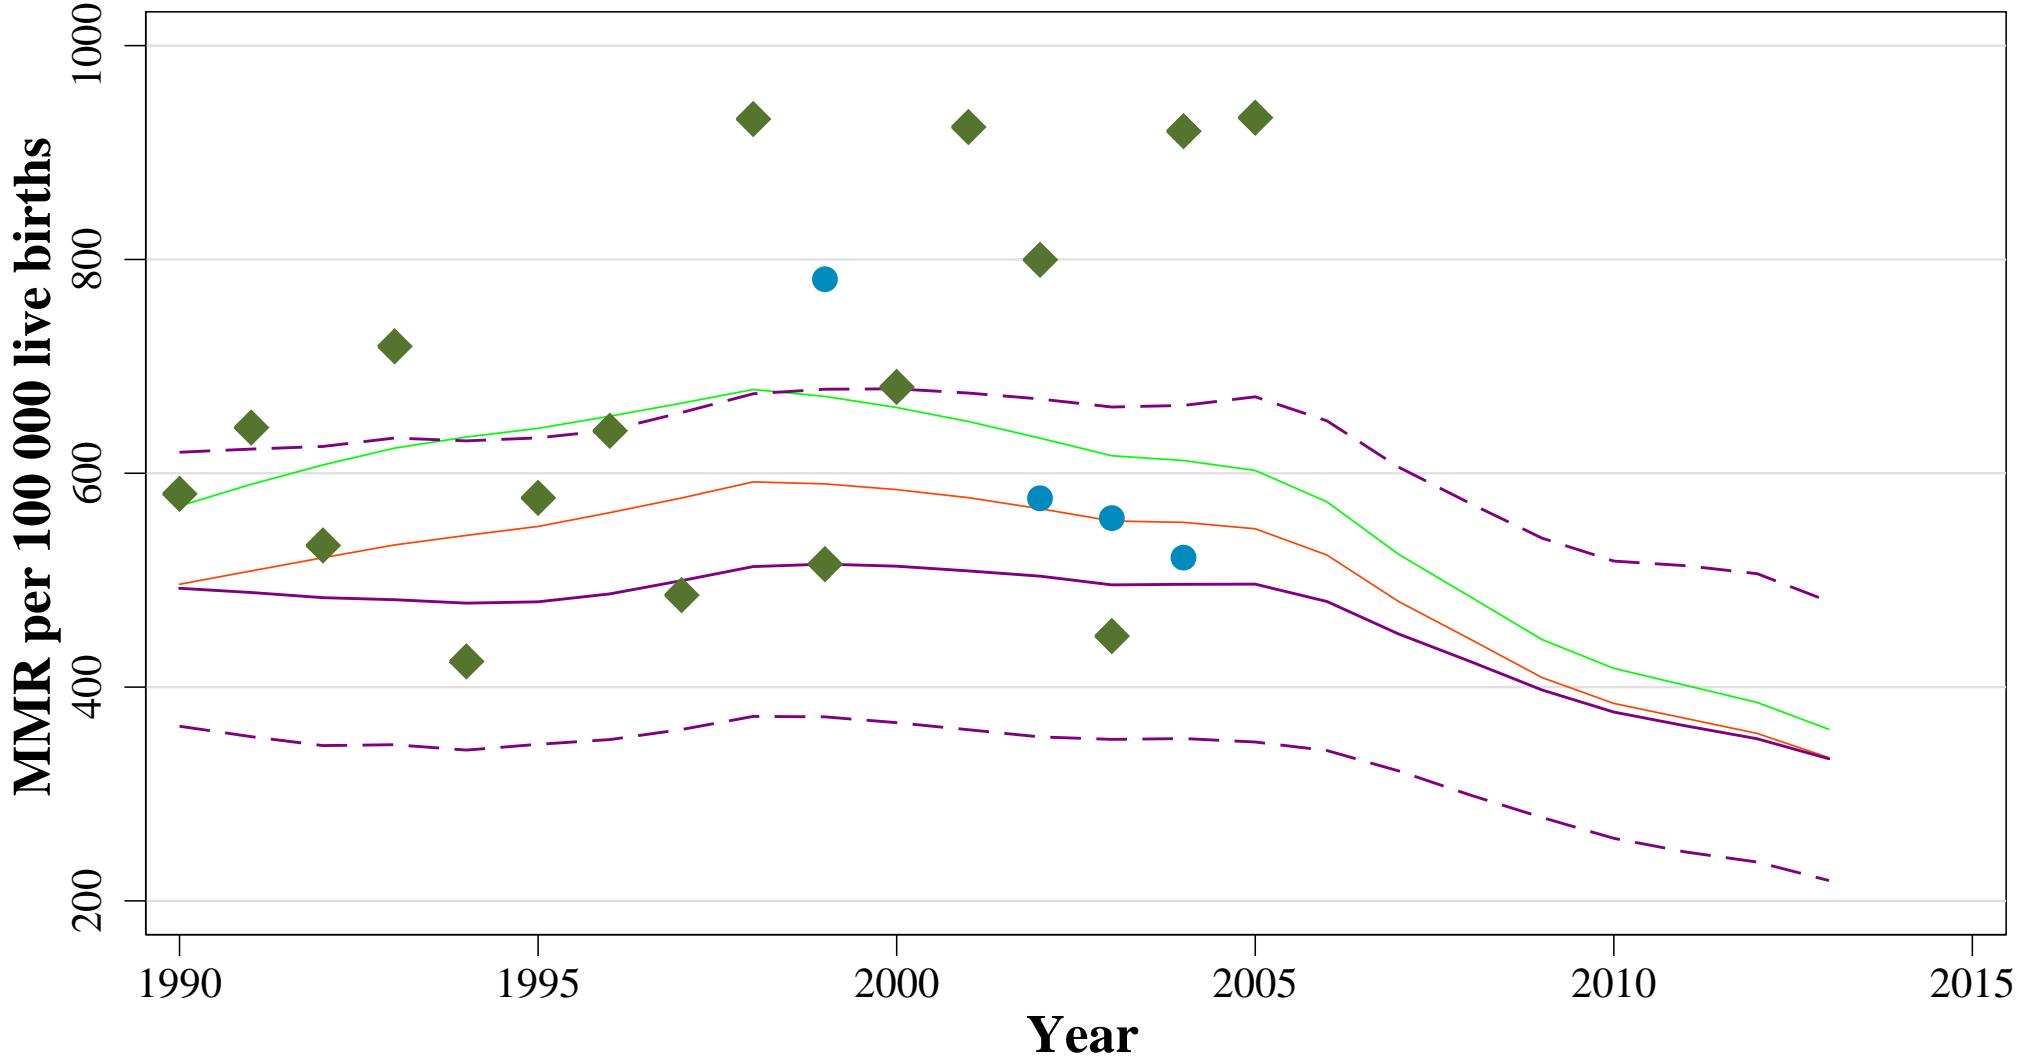



# Honduras

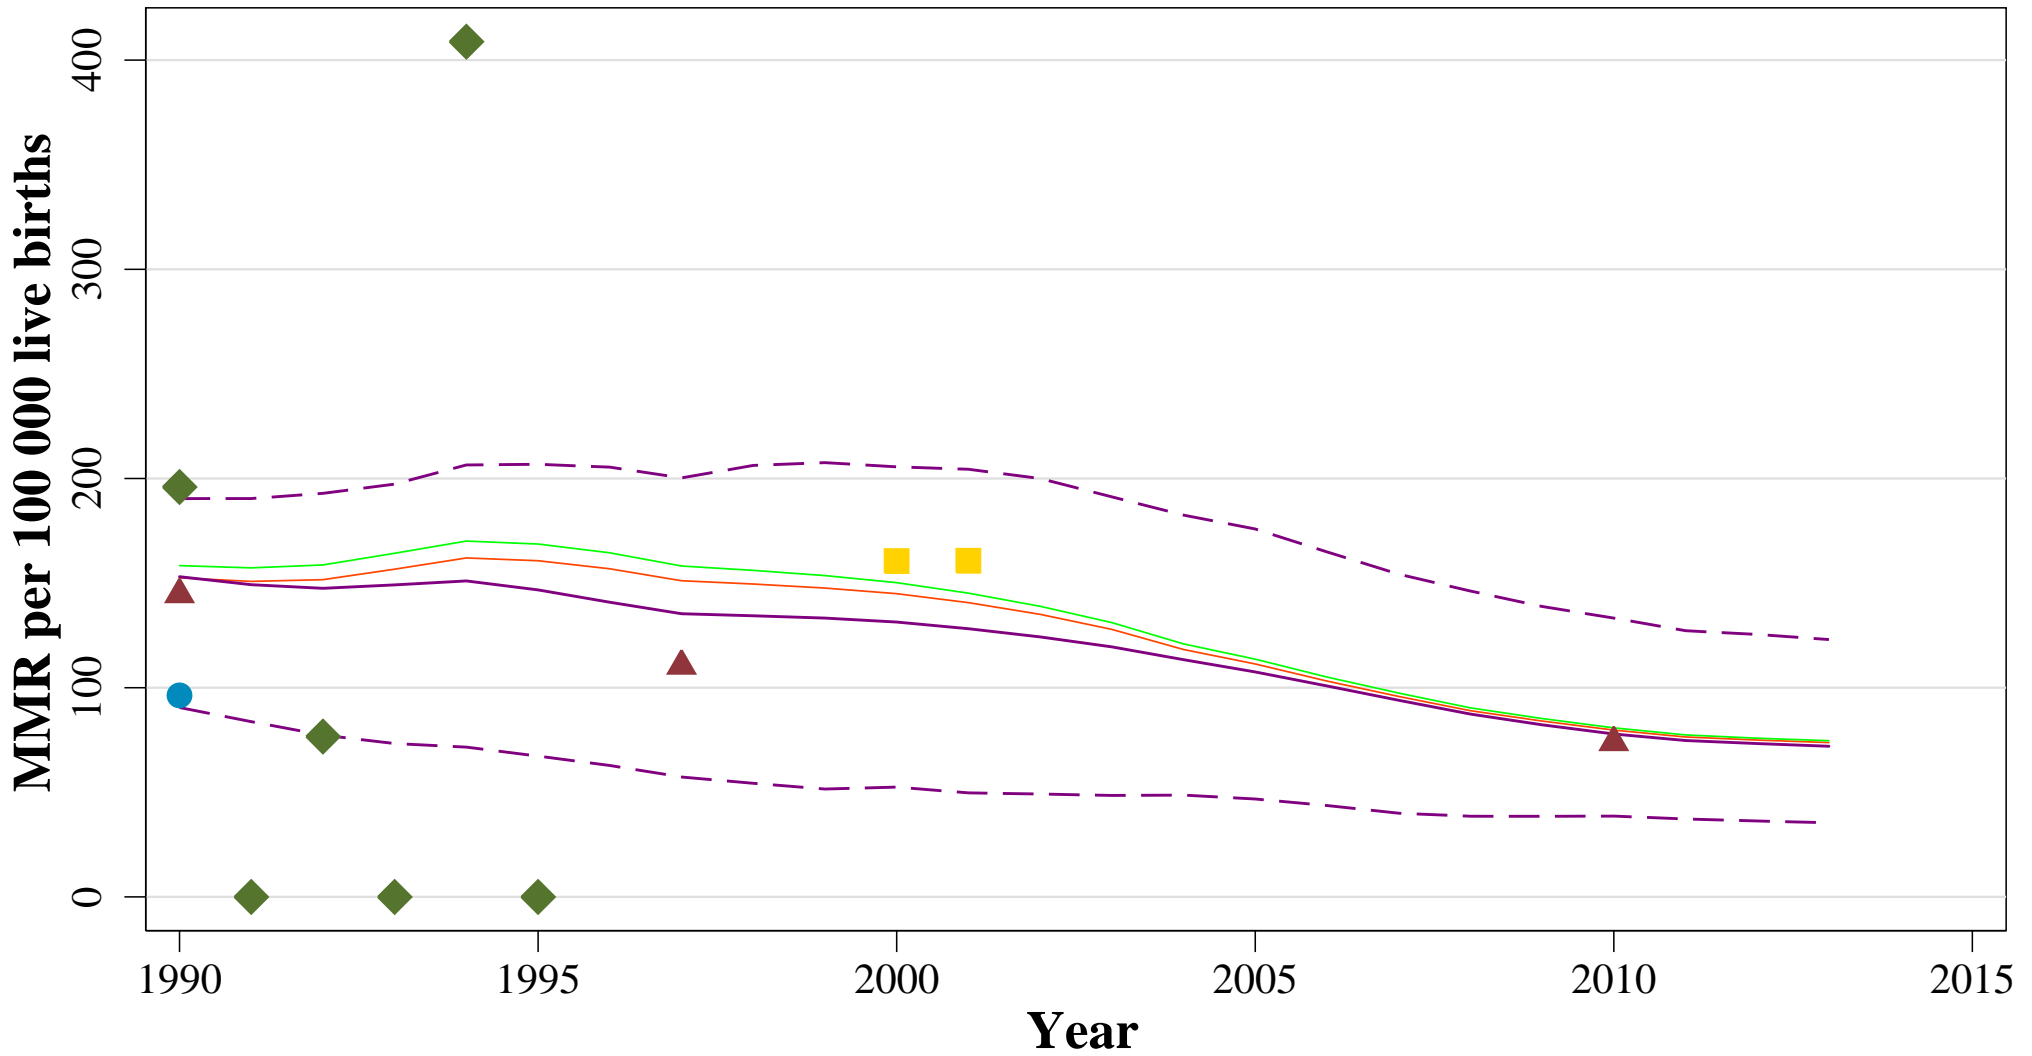

# Hungary

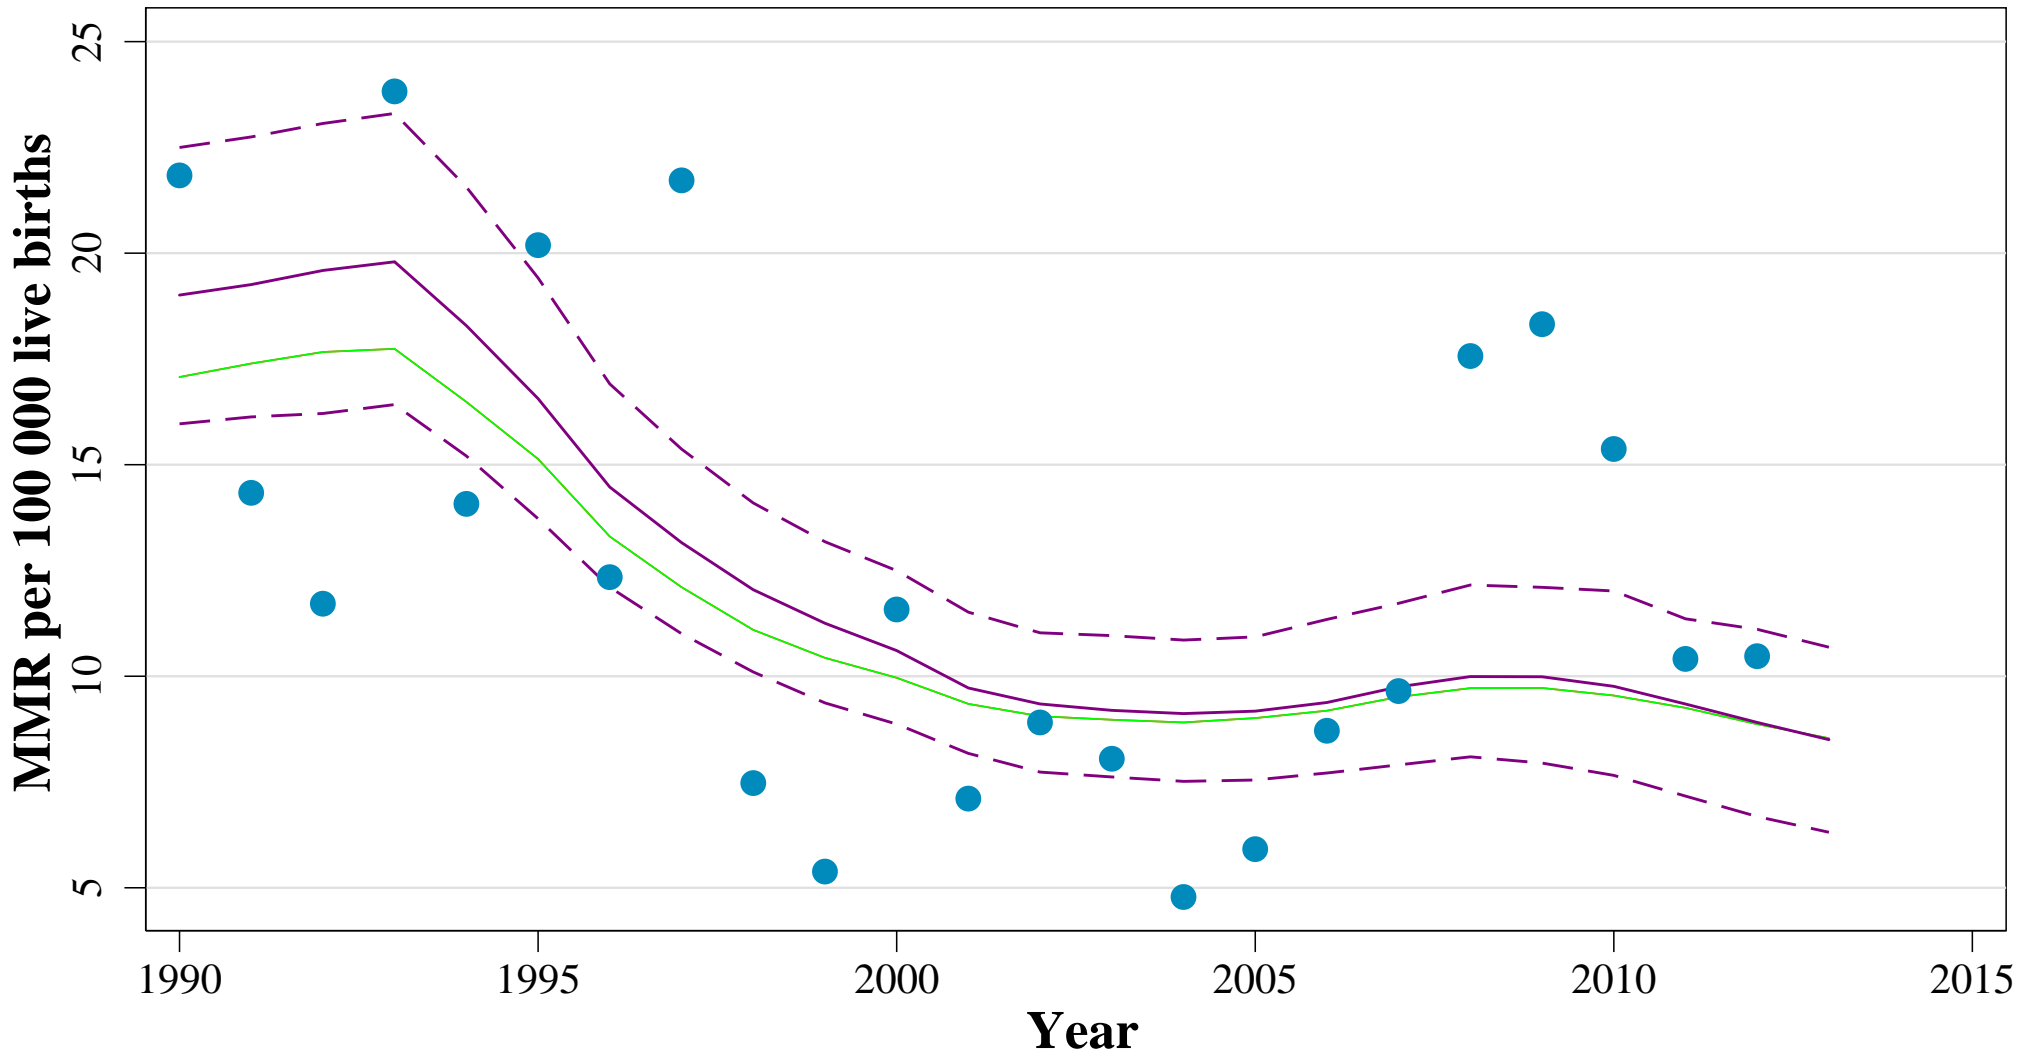

# Iceland

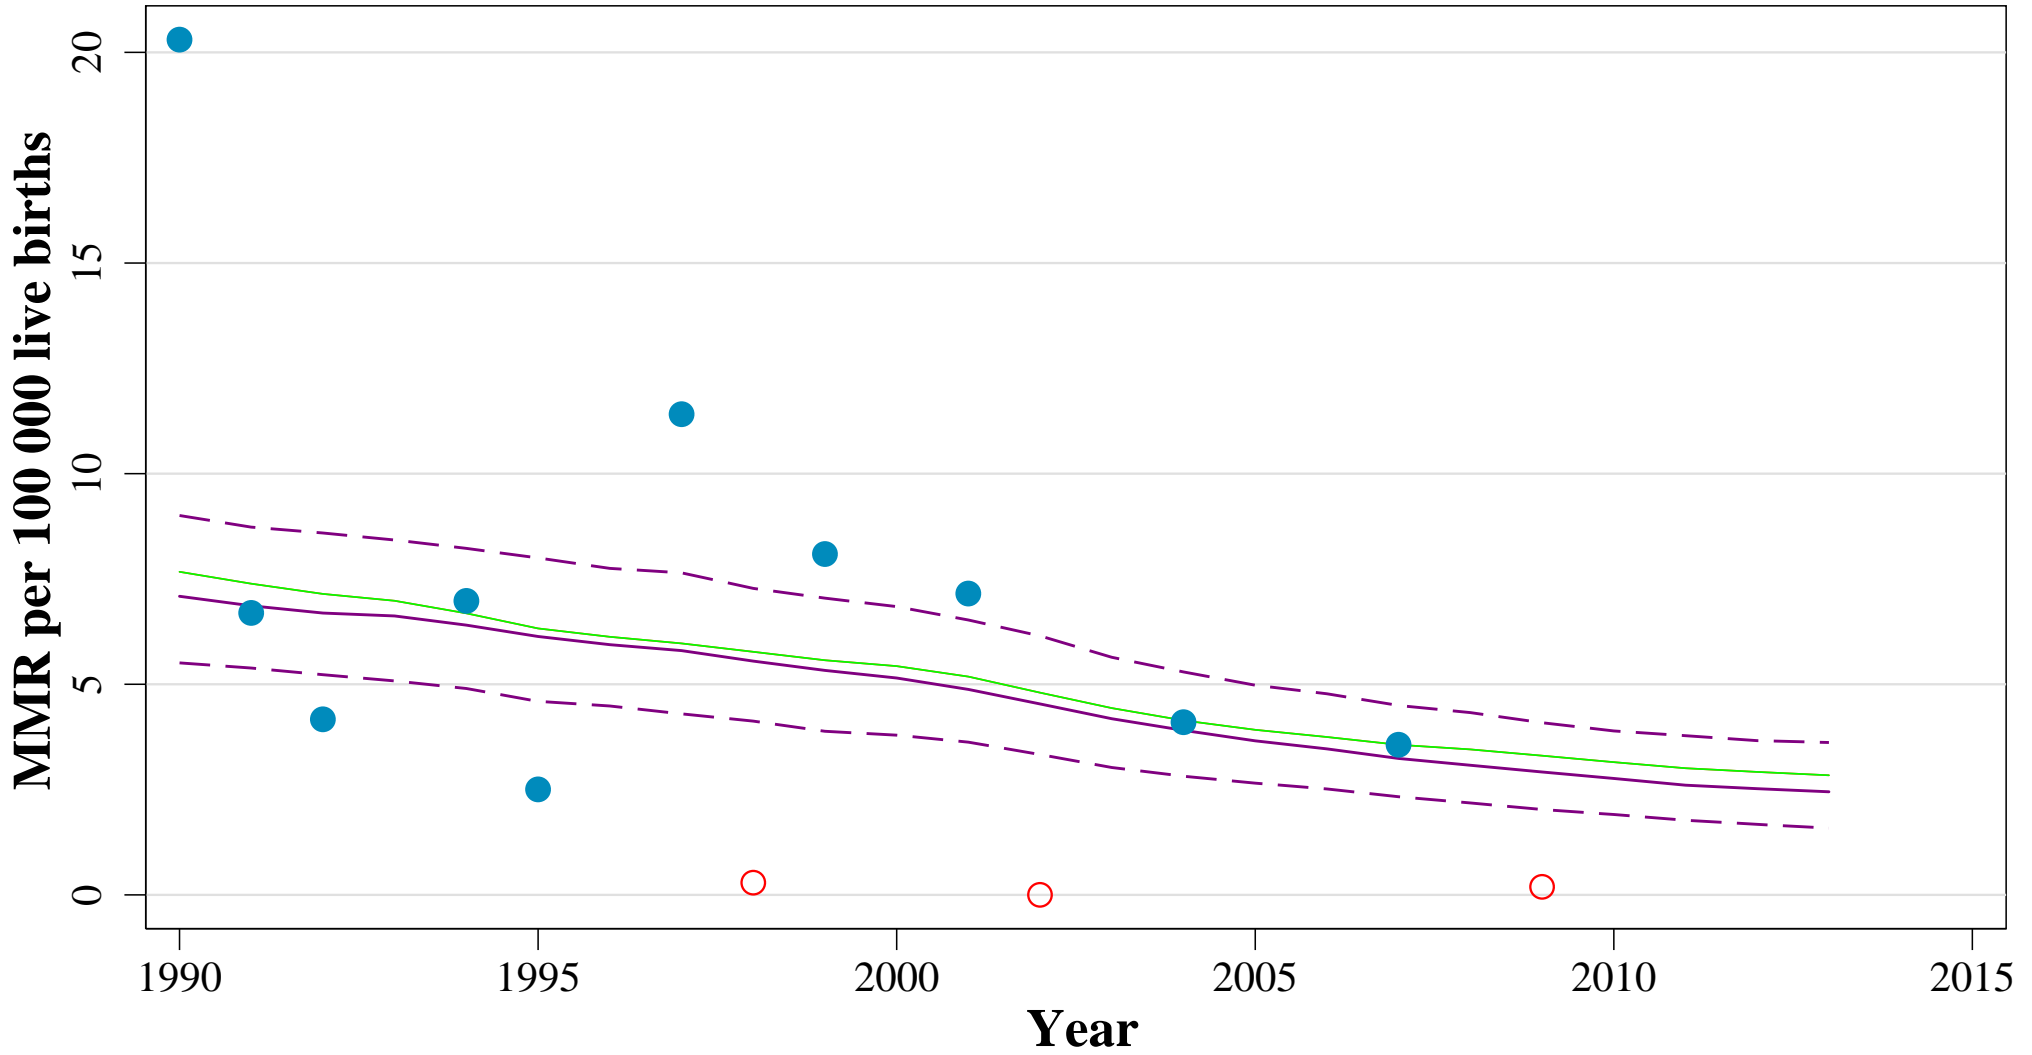

# India

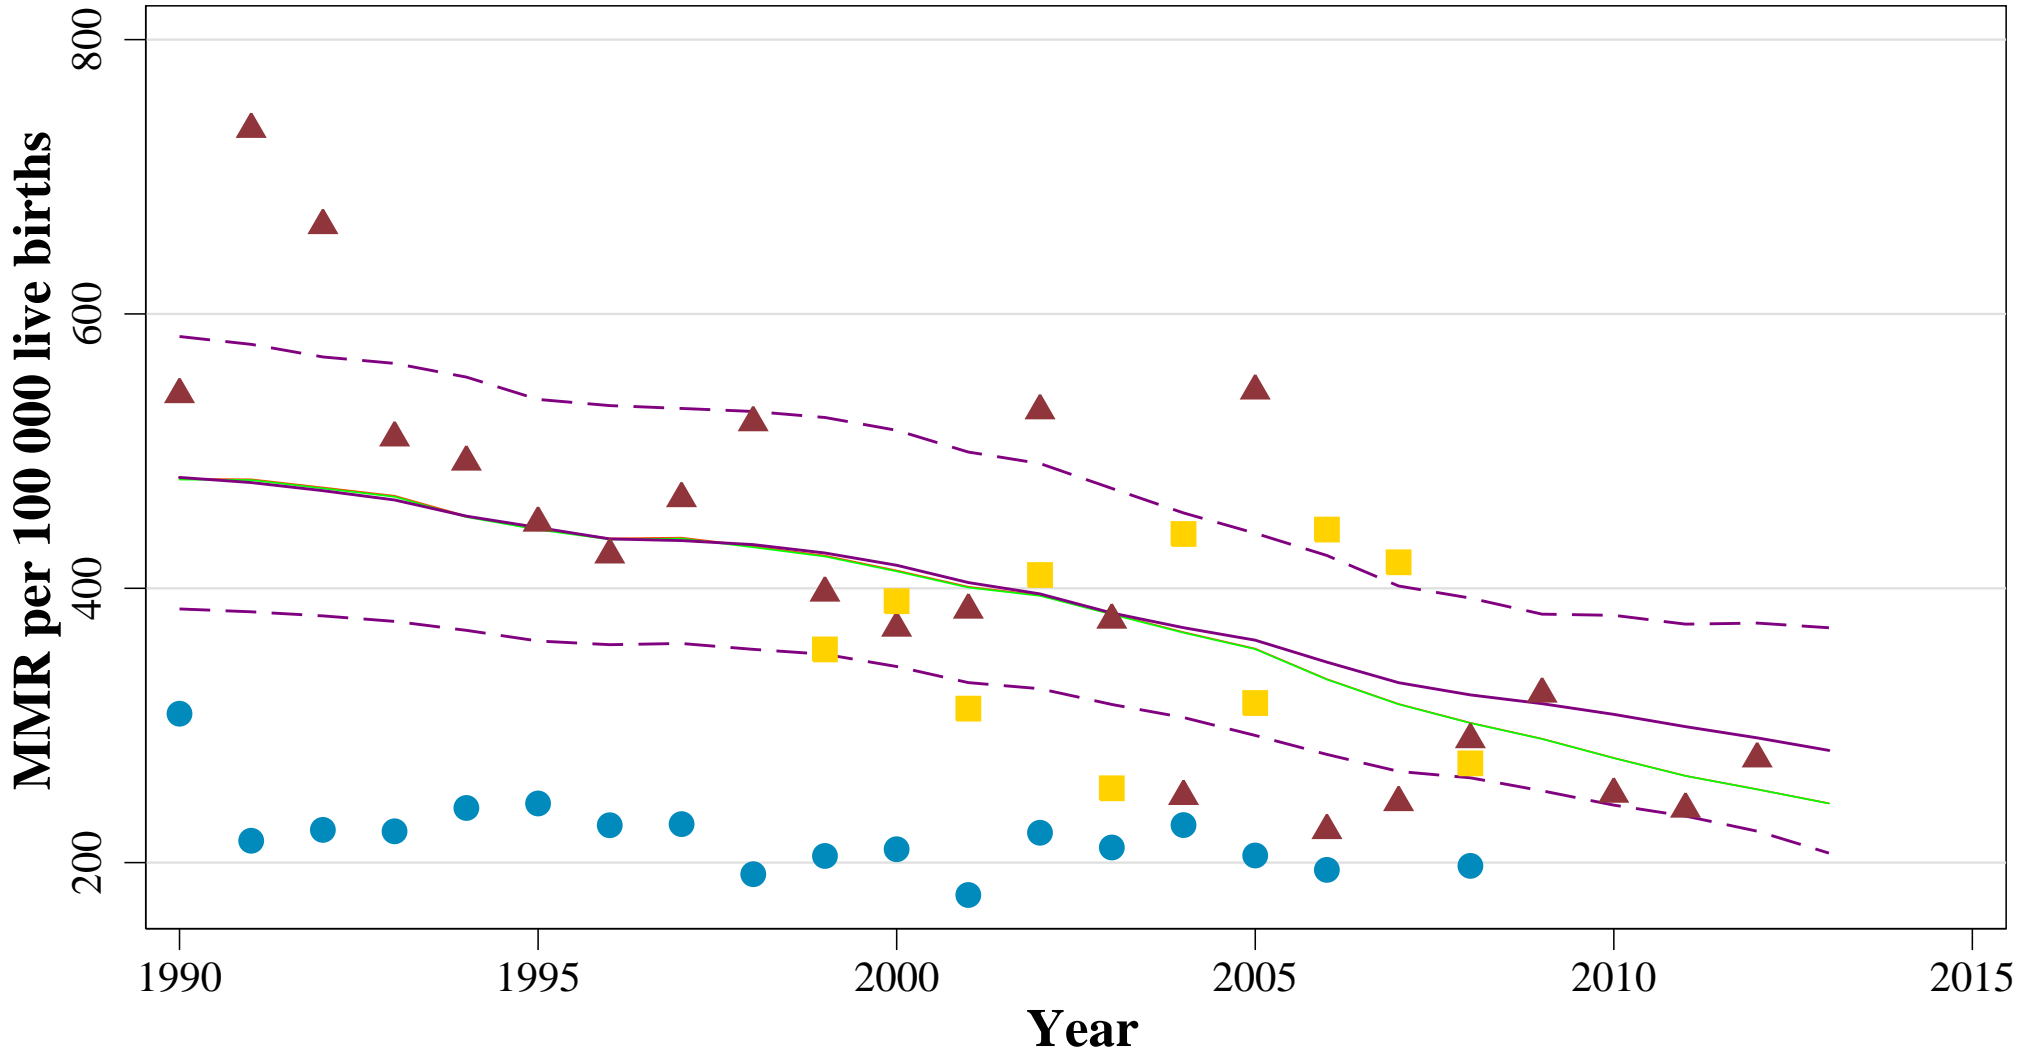

# Indonesia

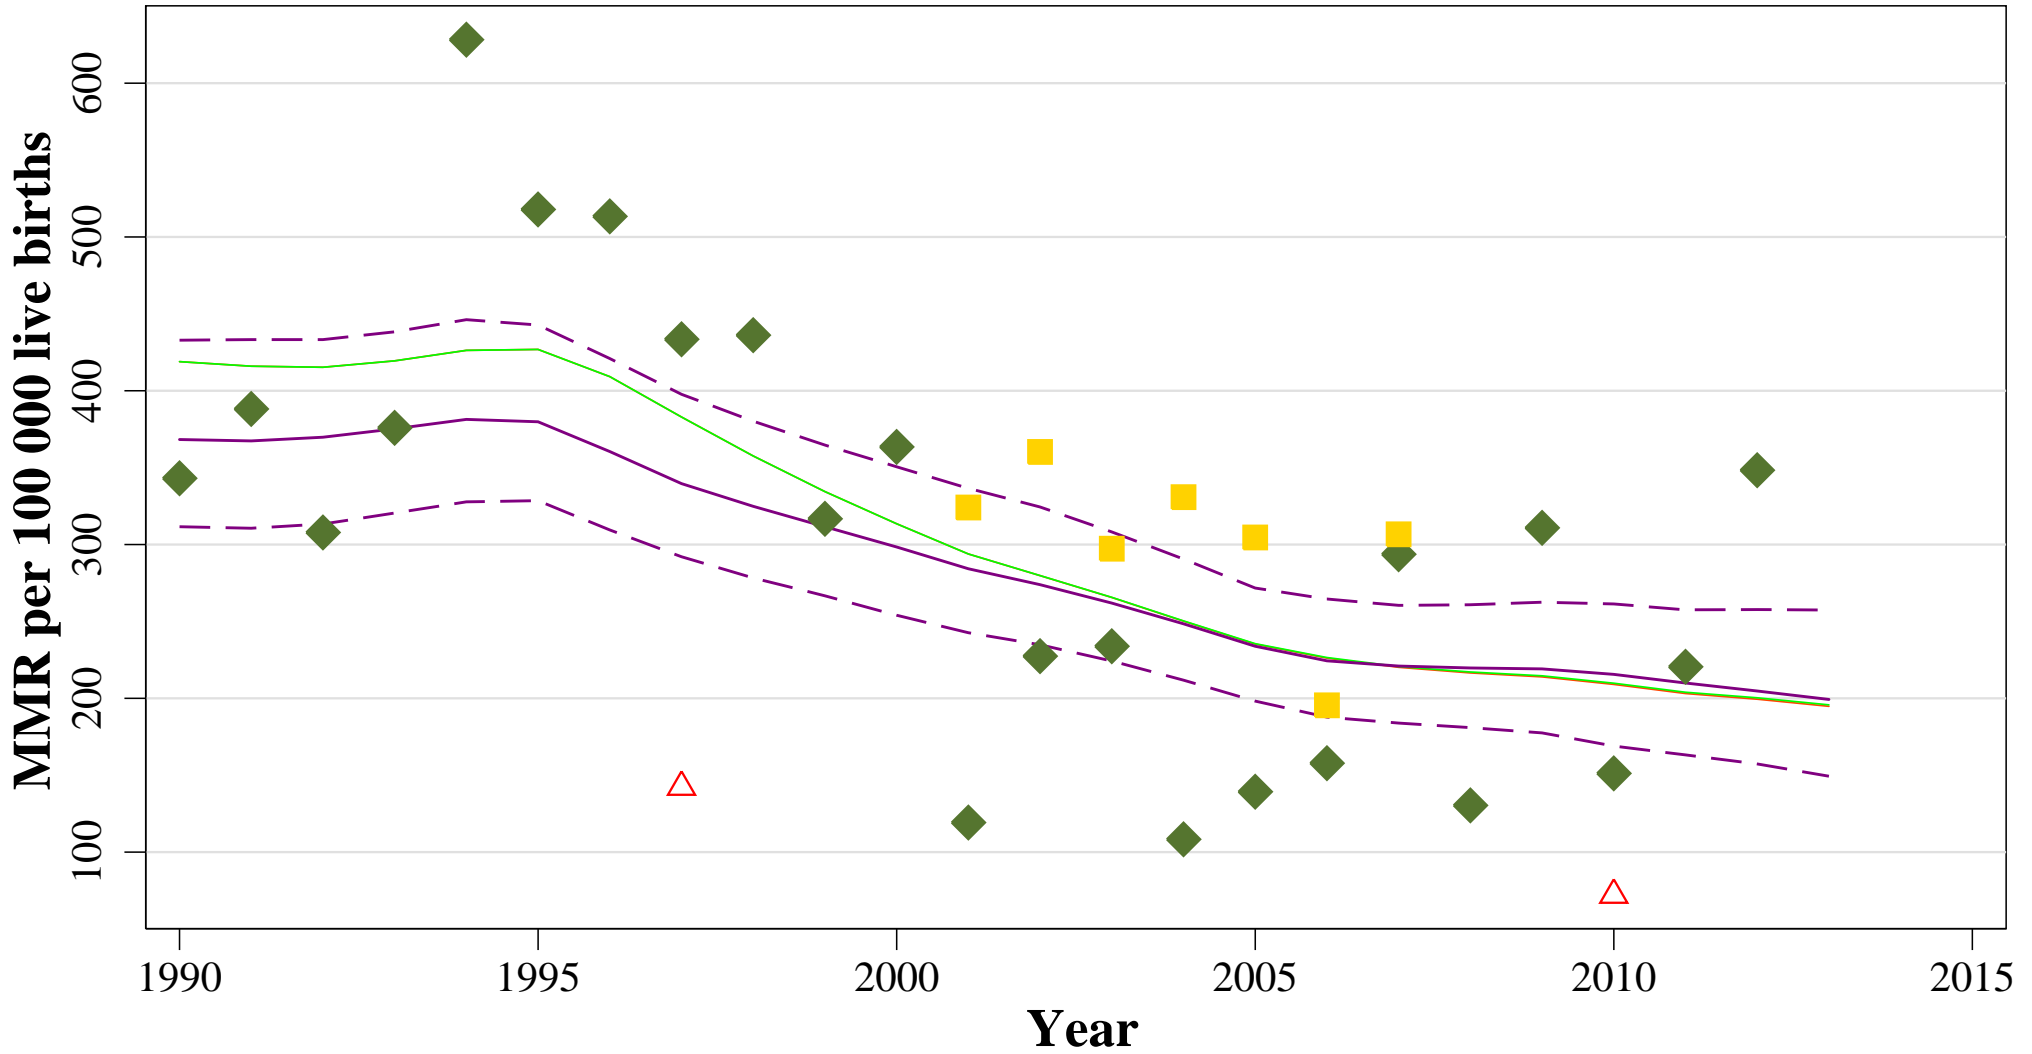

# Iran

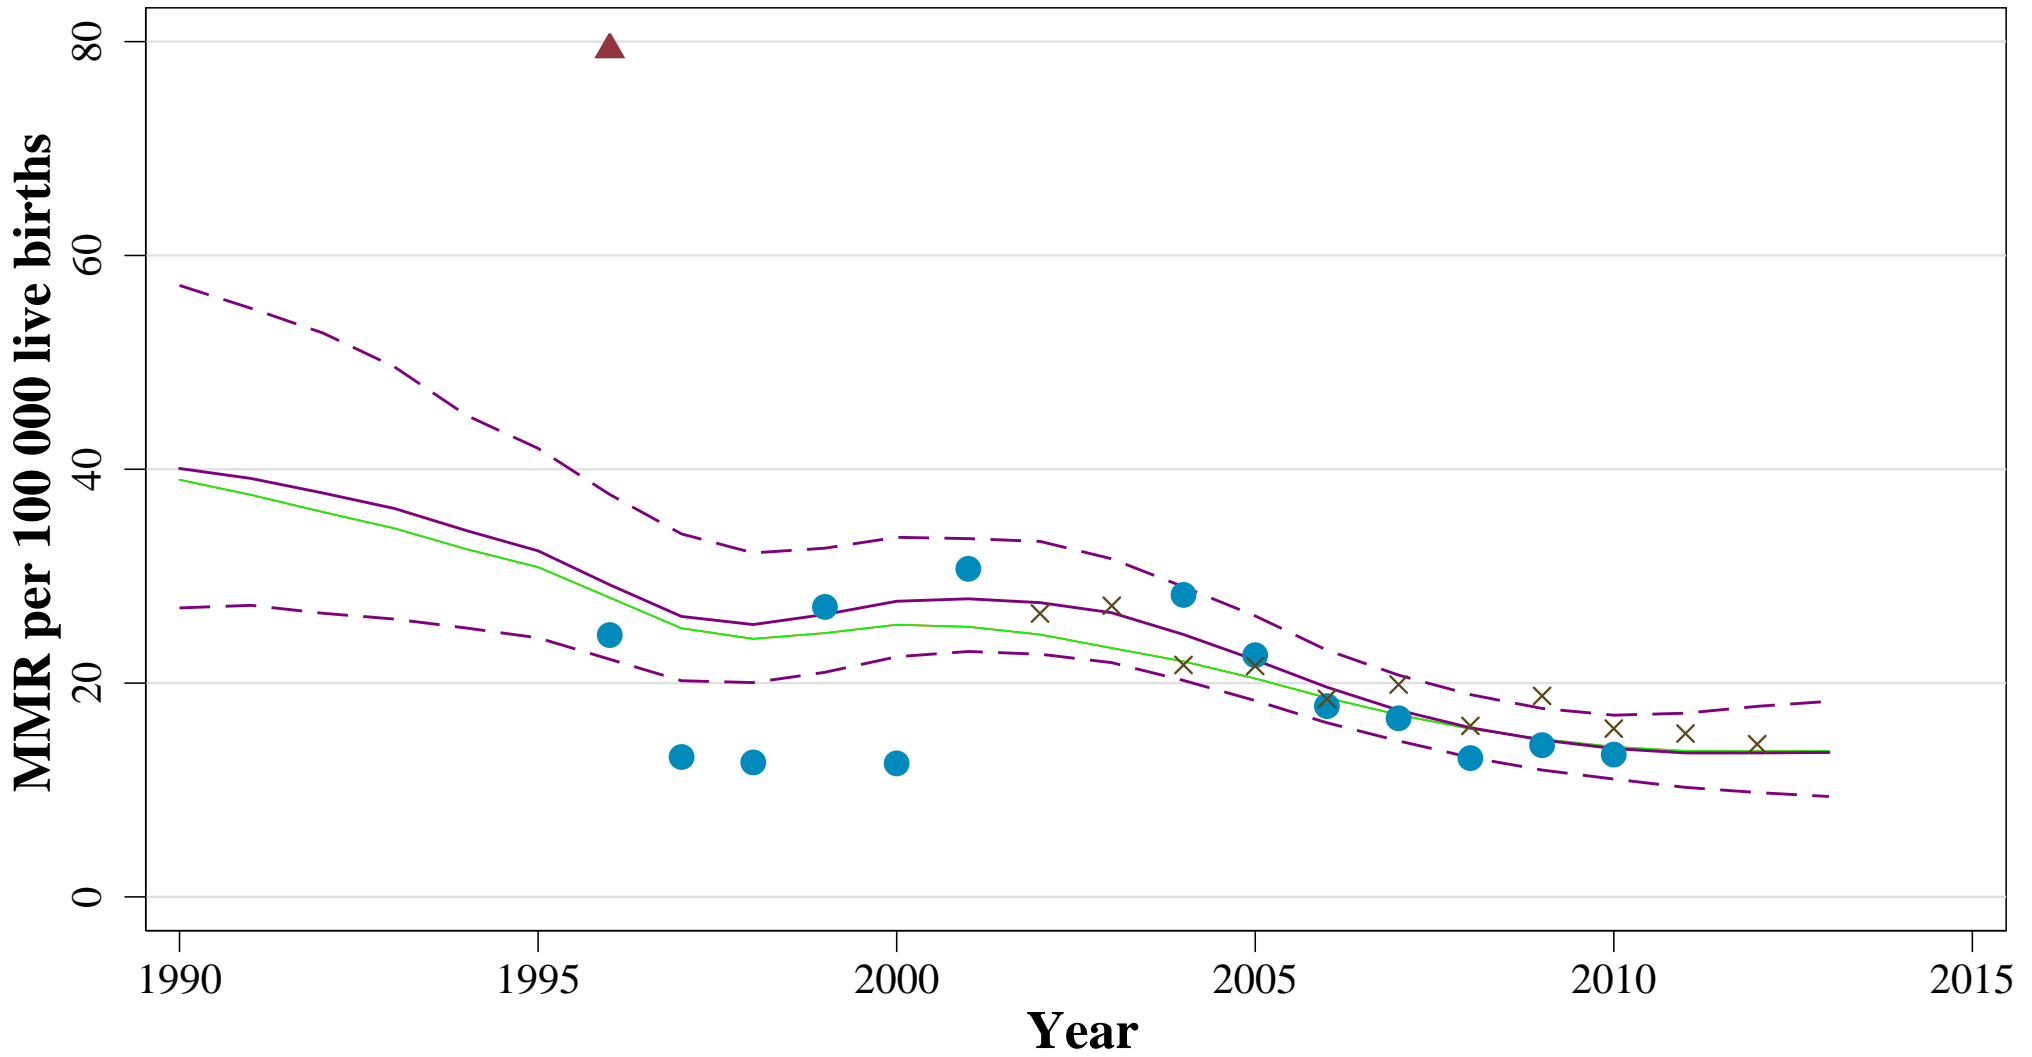

# Iraq

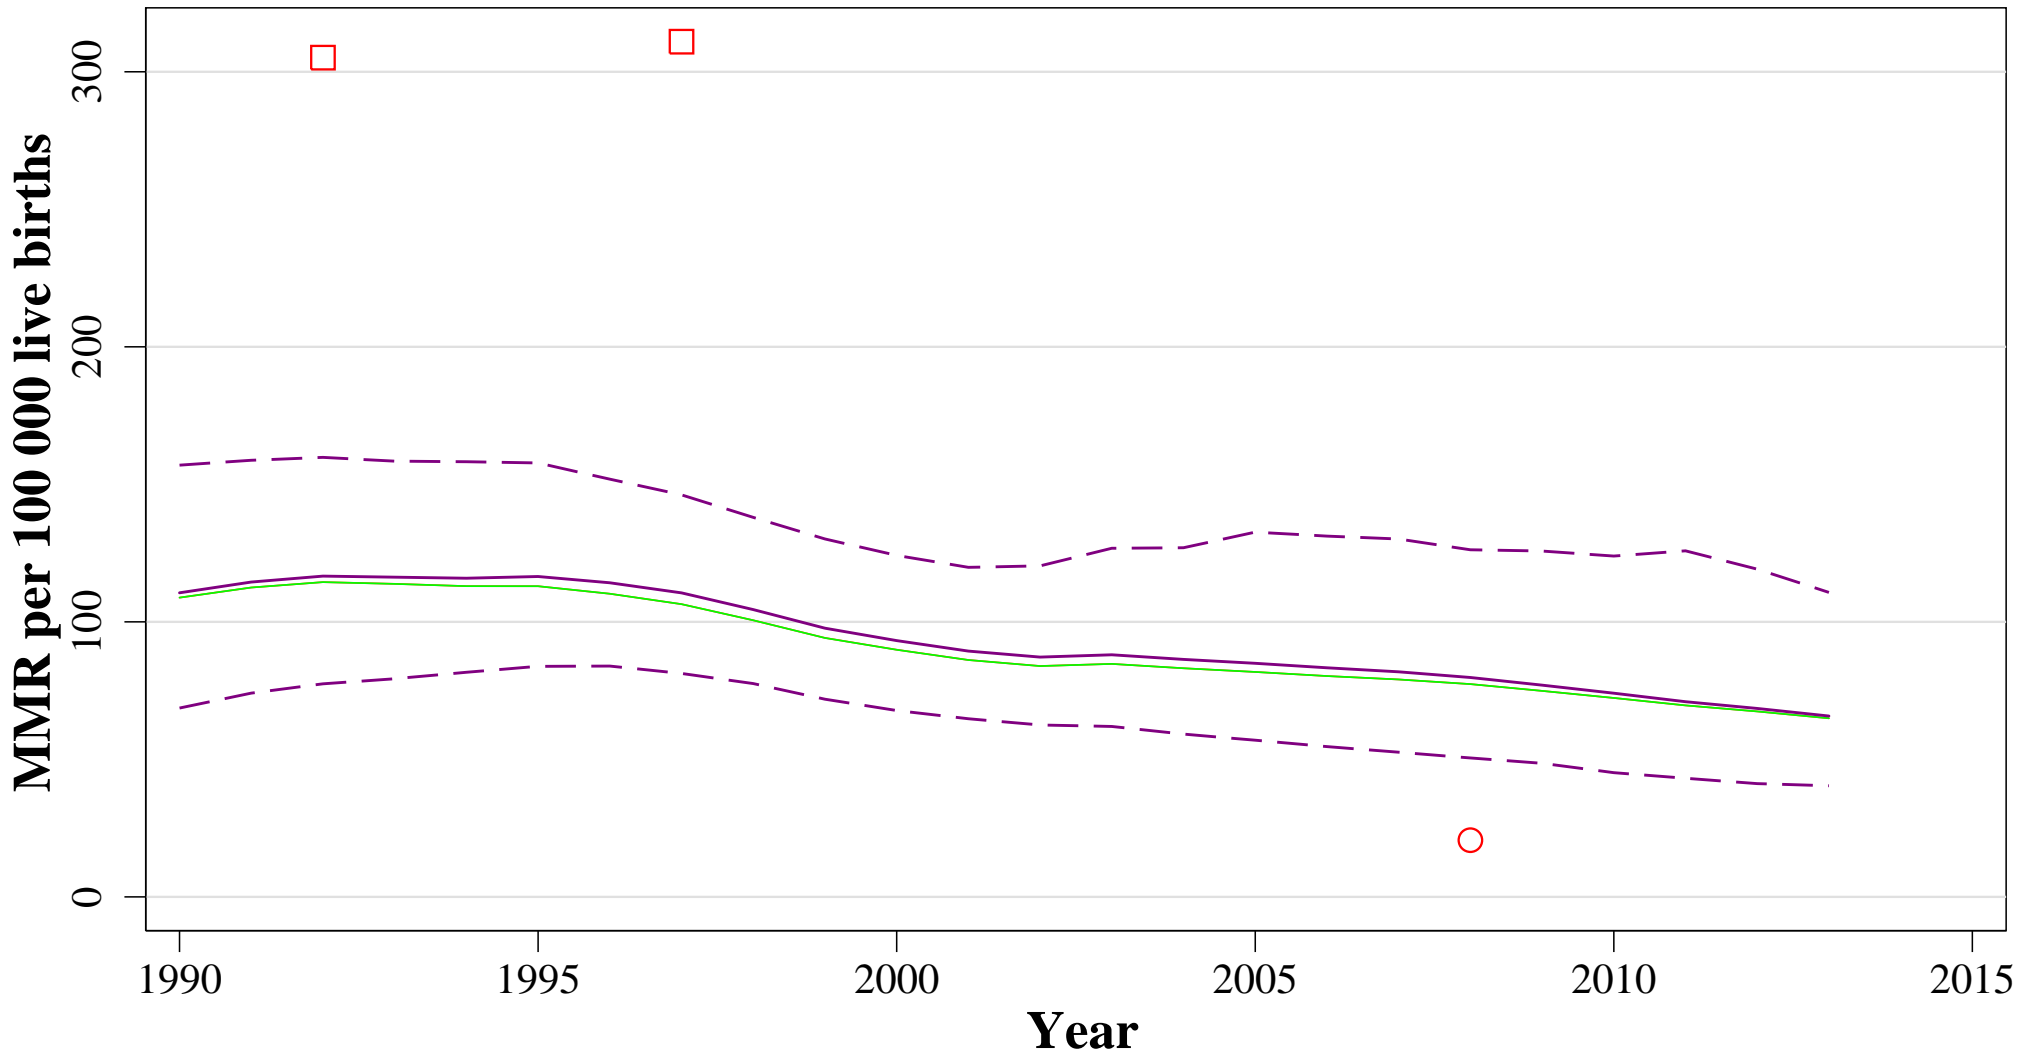

# Ireland

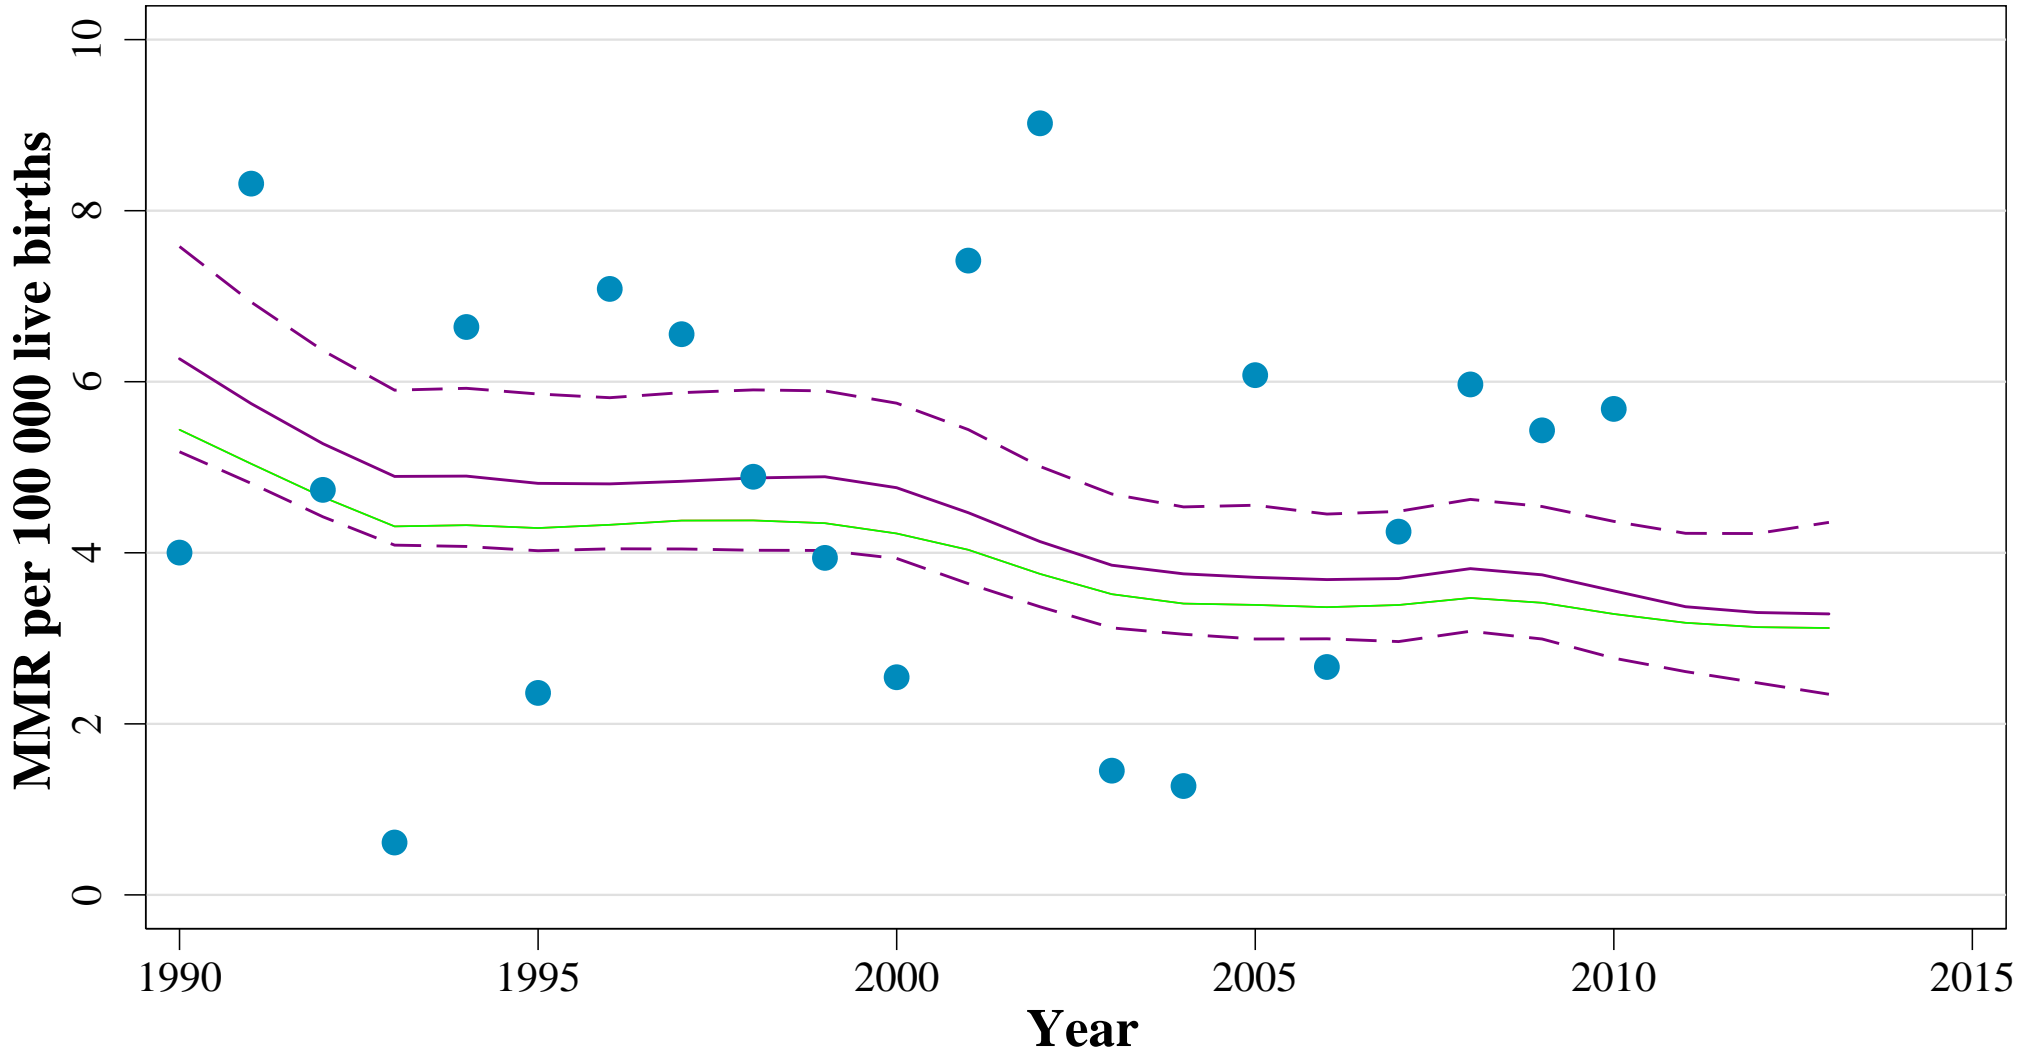



# Israel

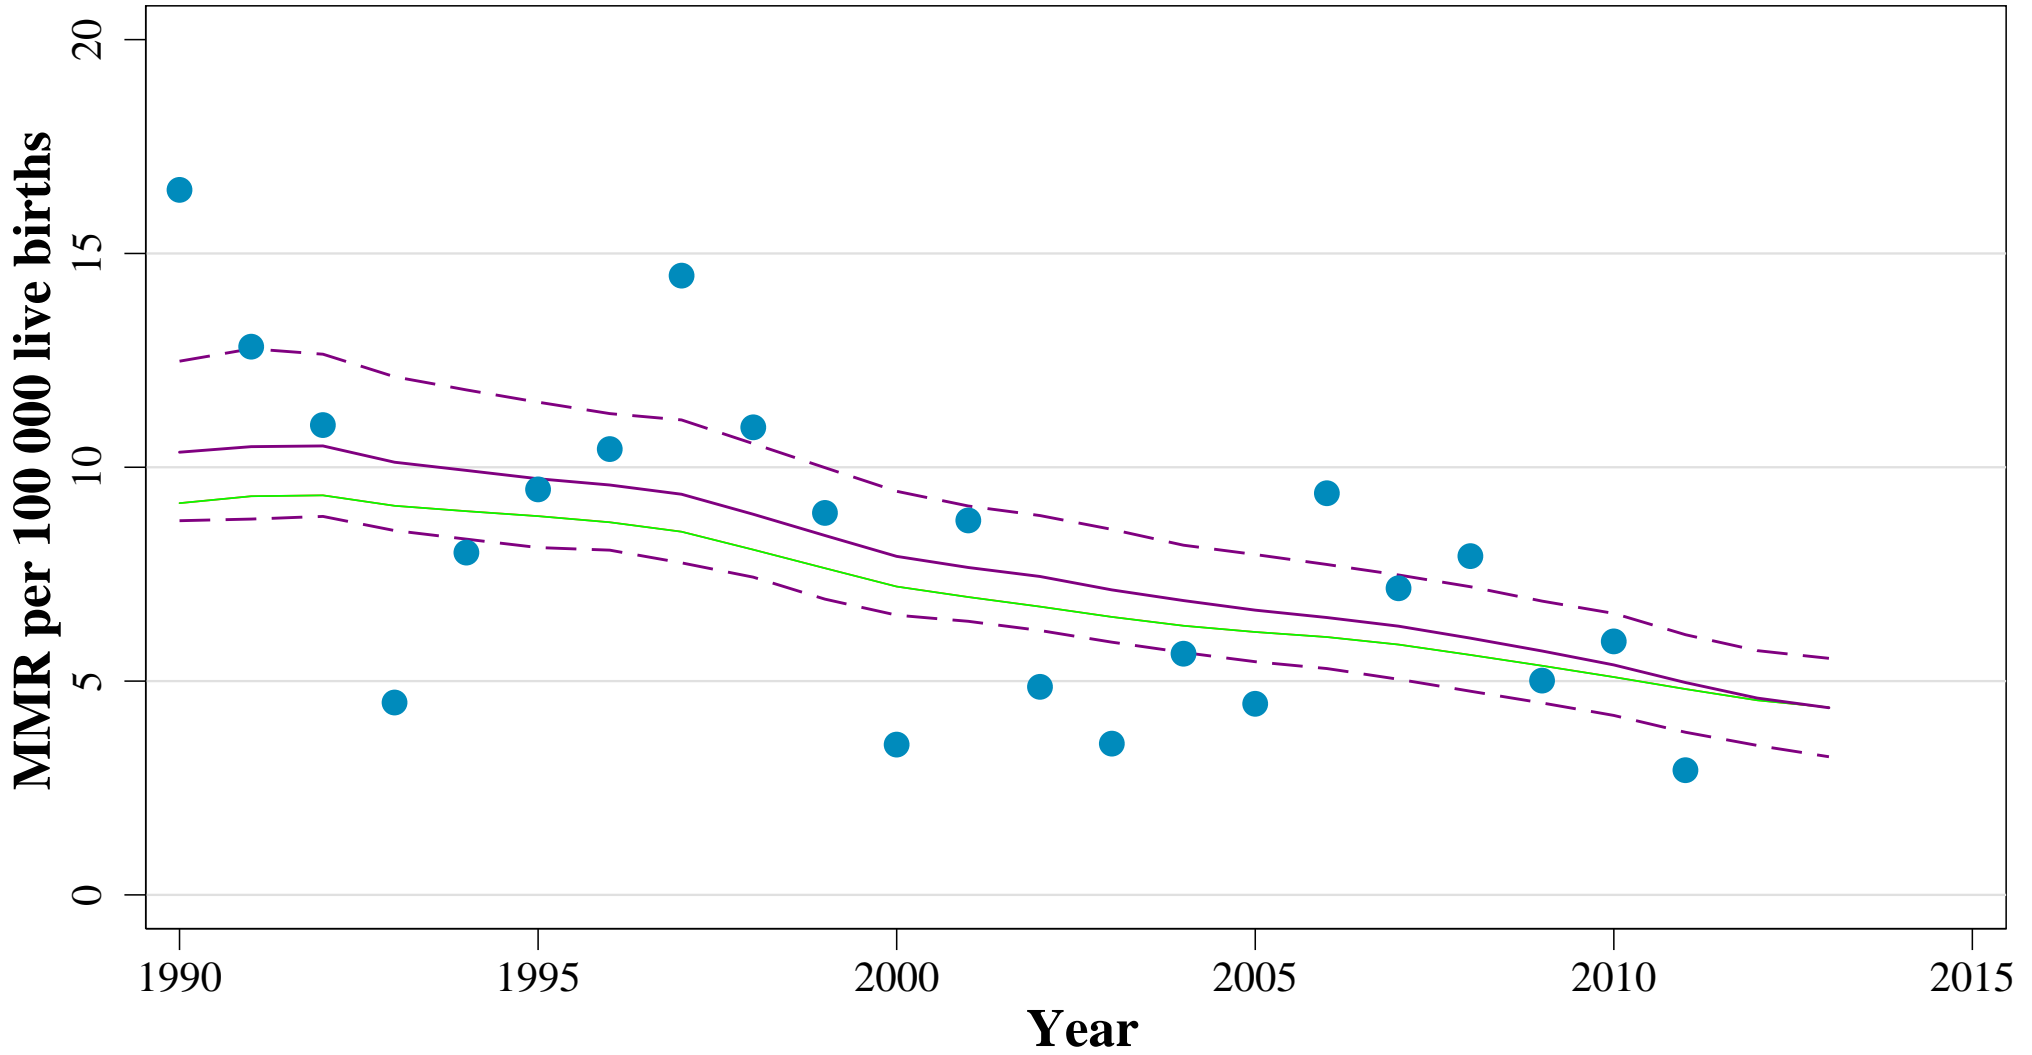

# Italy

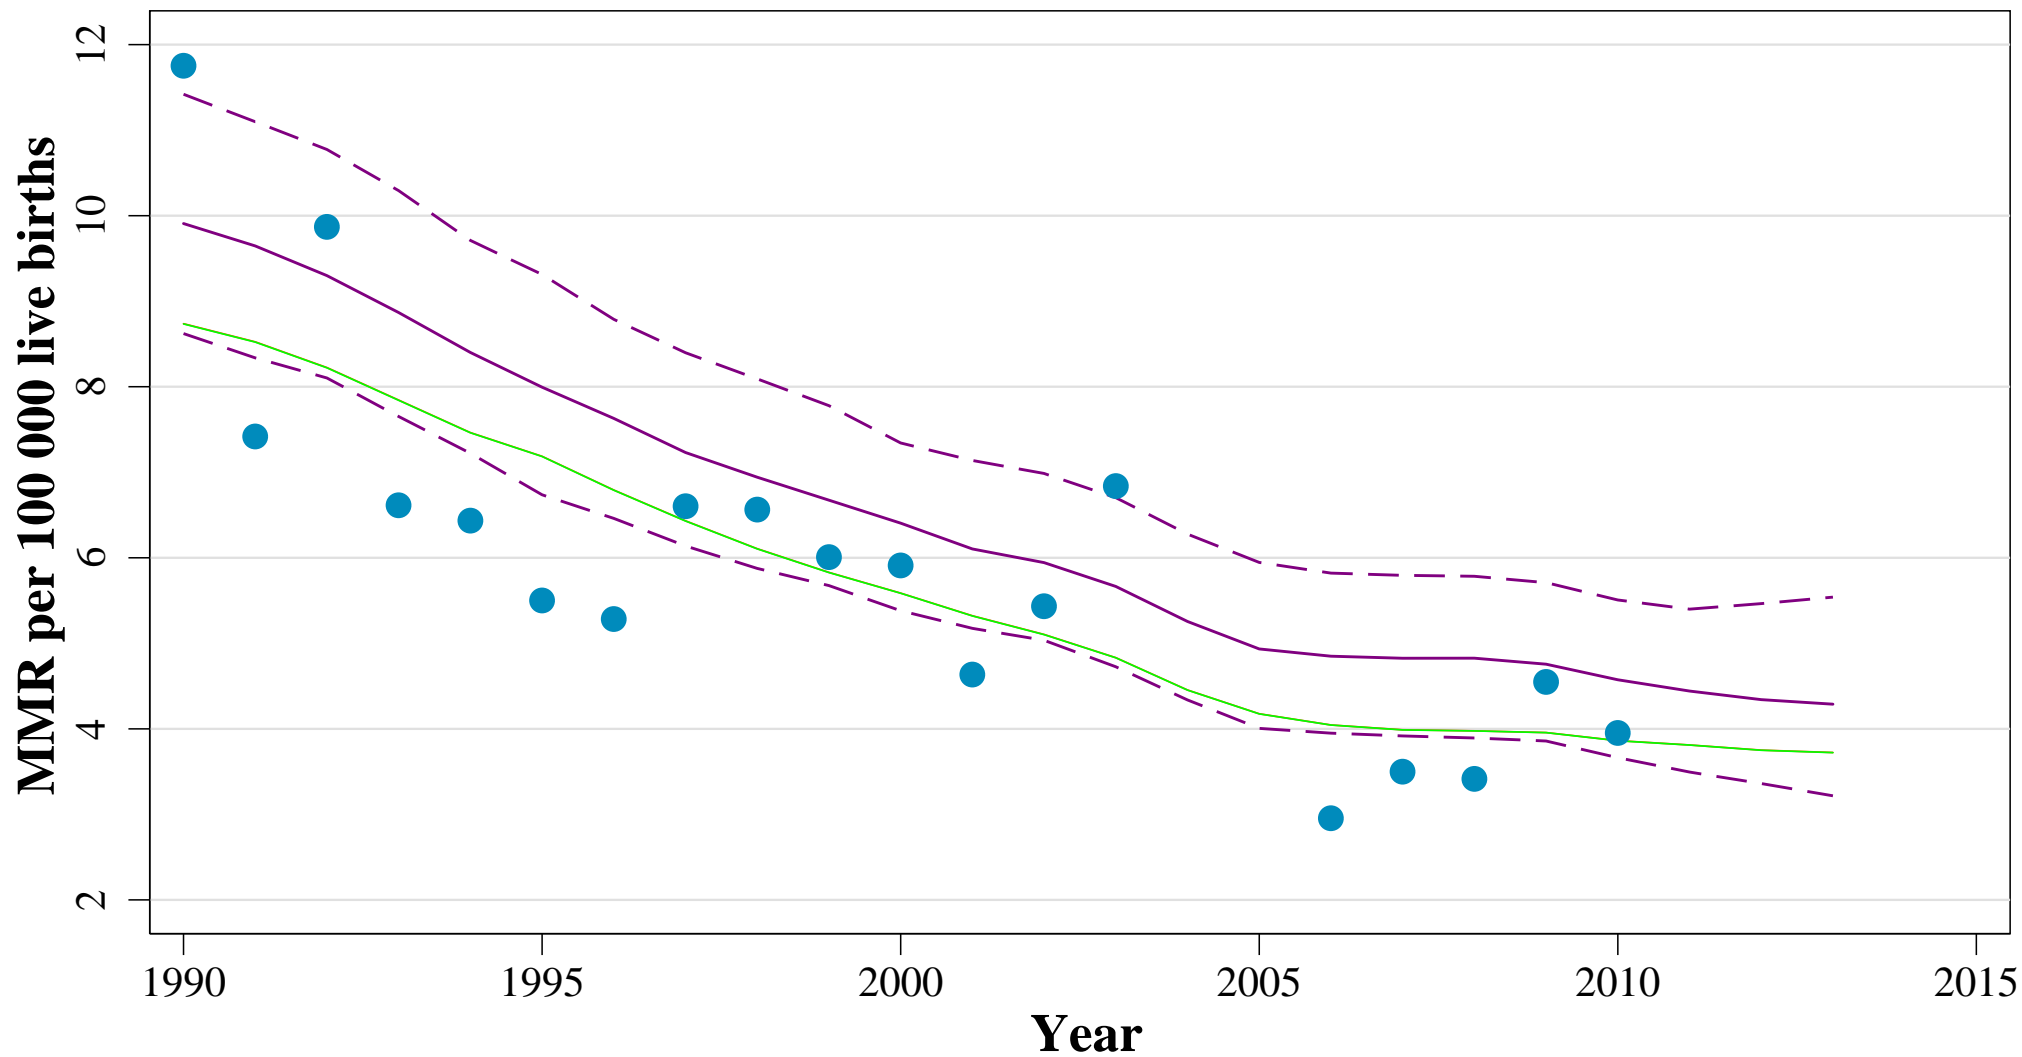

# Jamaica

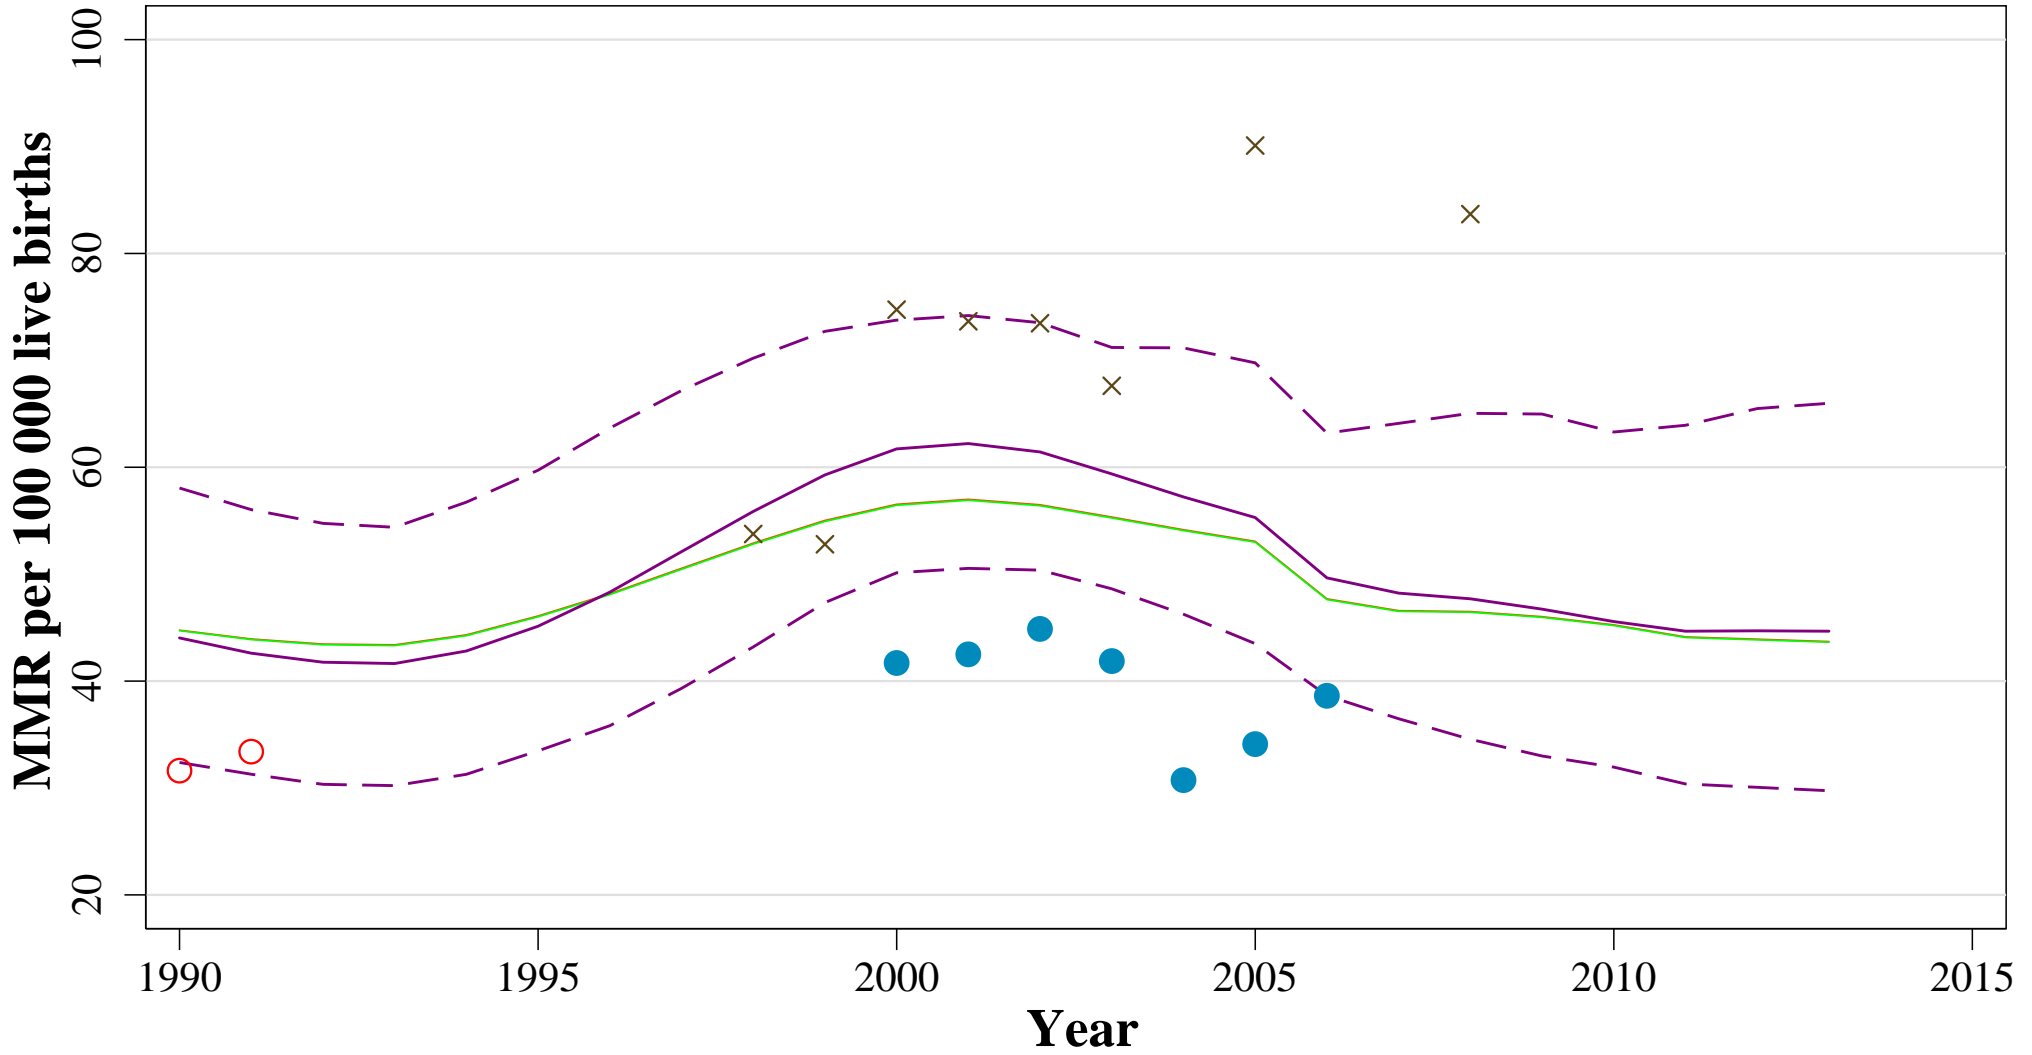

# Japan

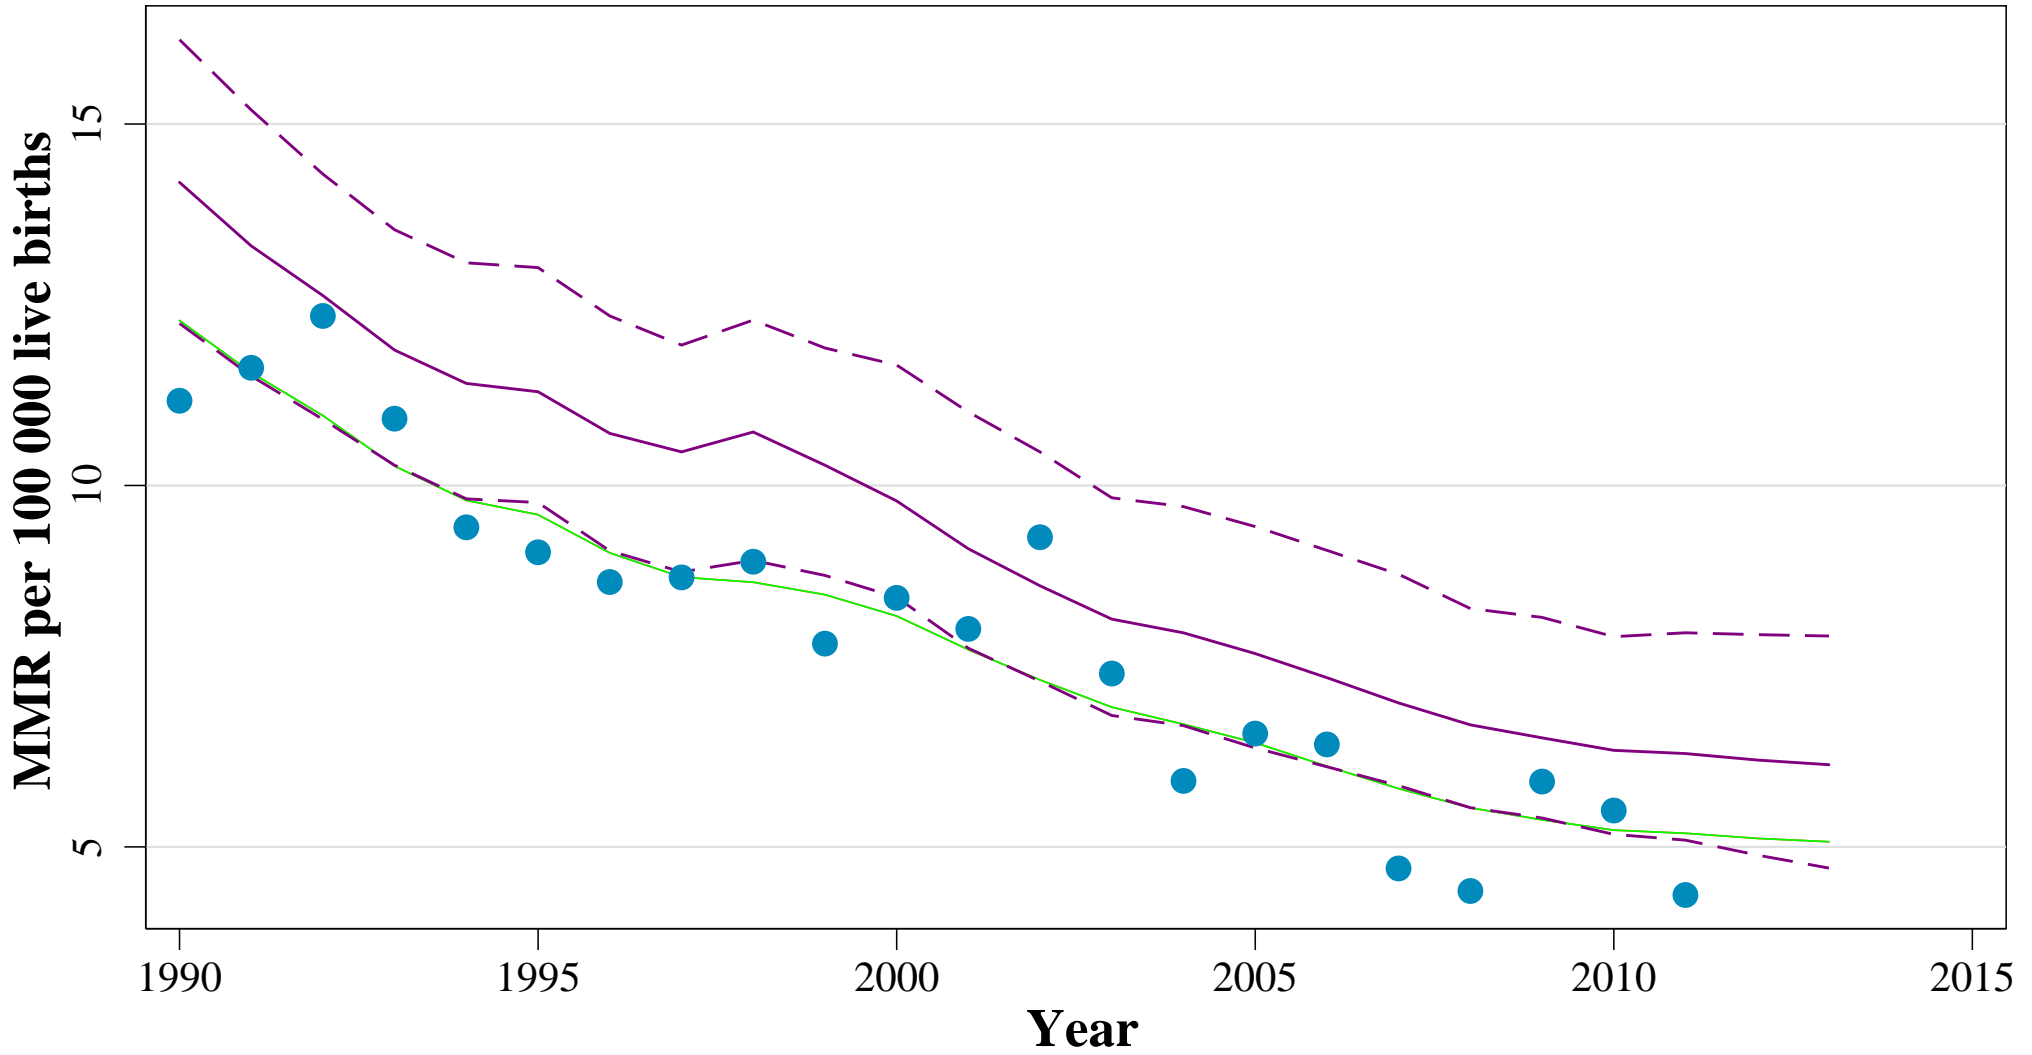

# Jordan

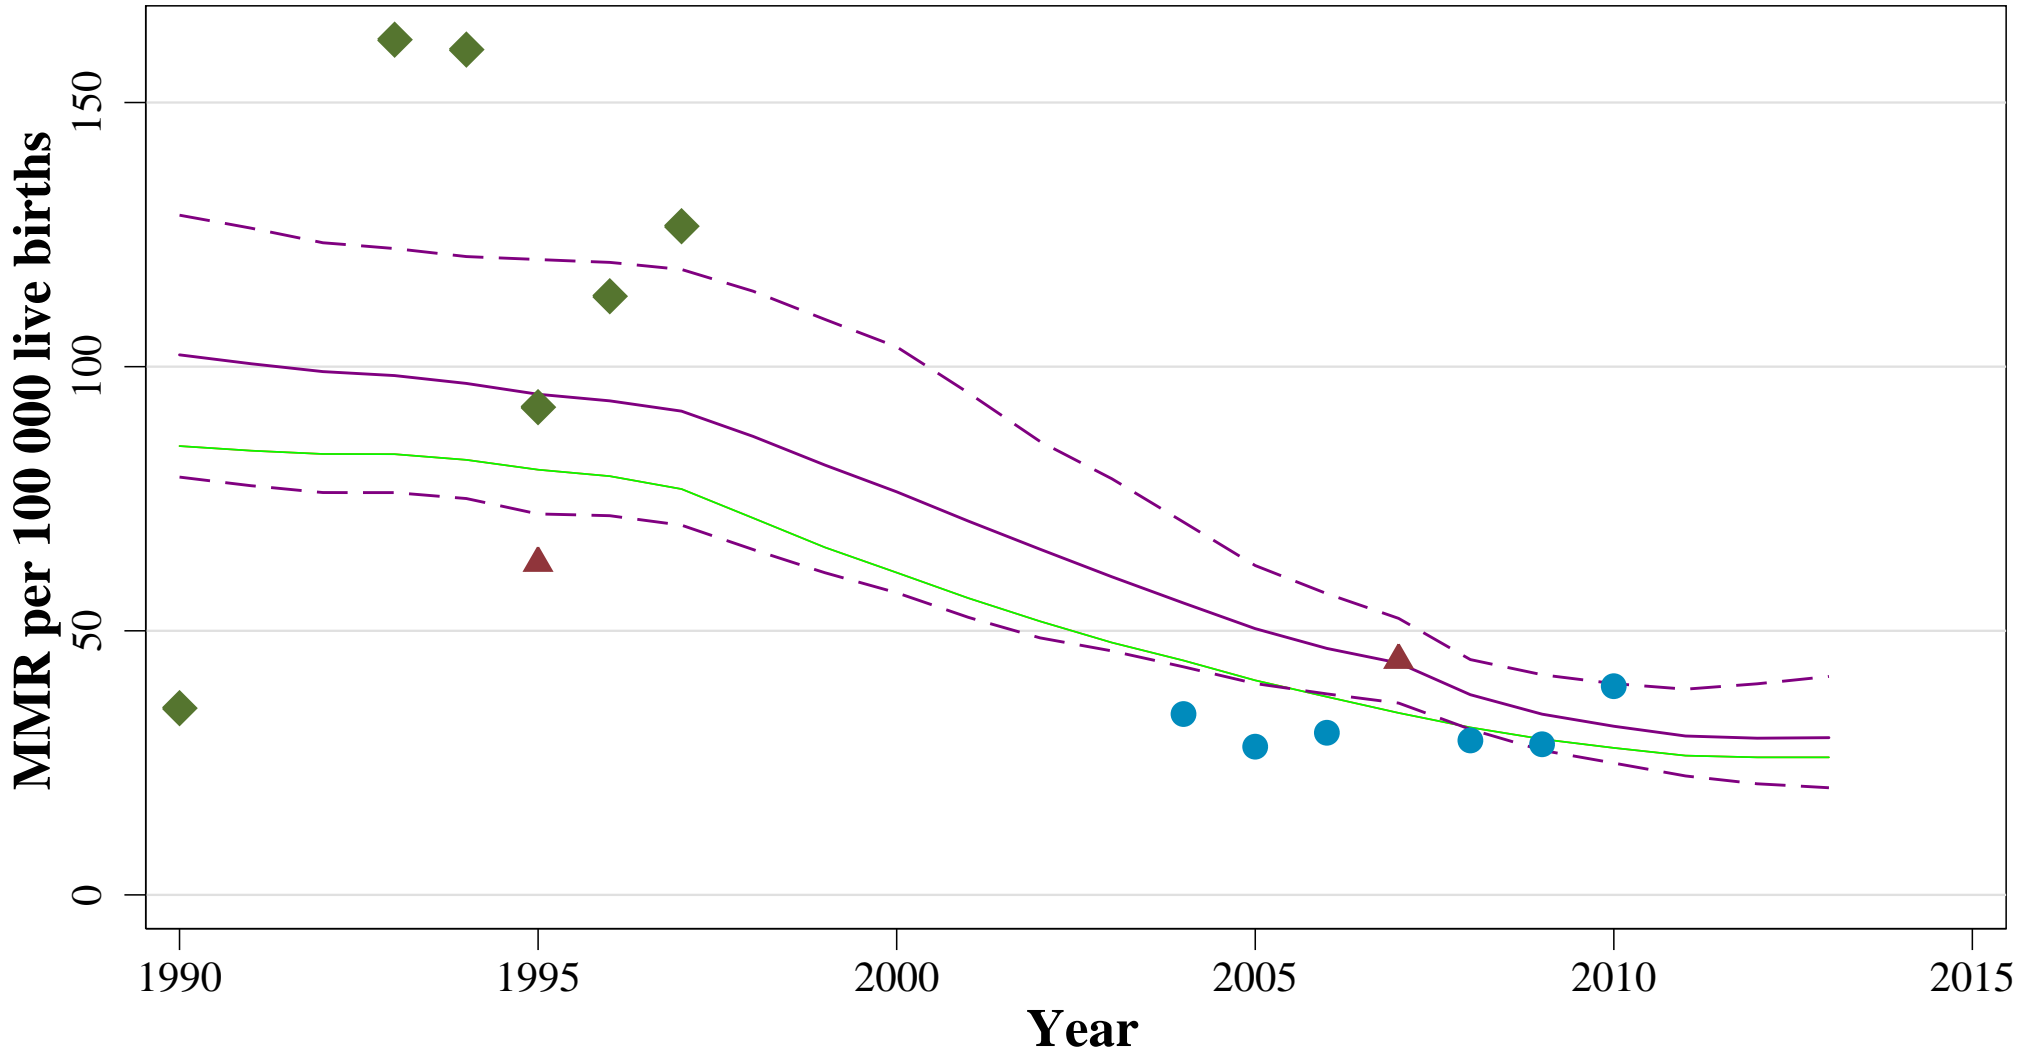

# Kazakhstan

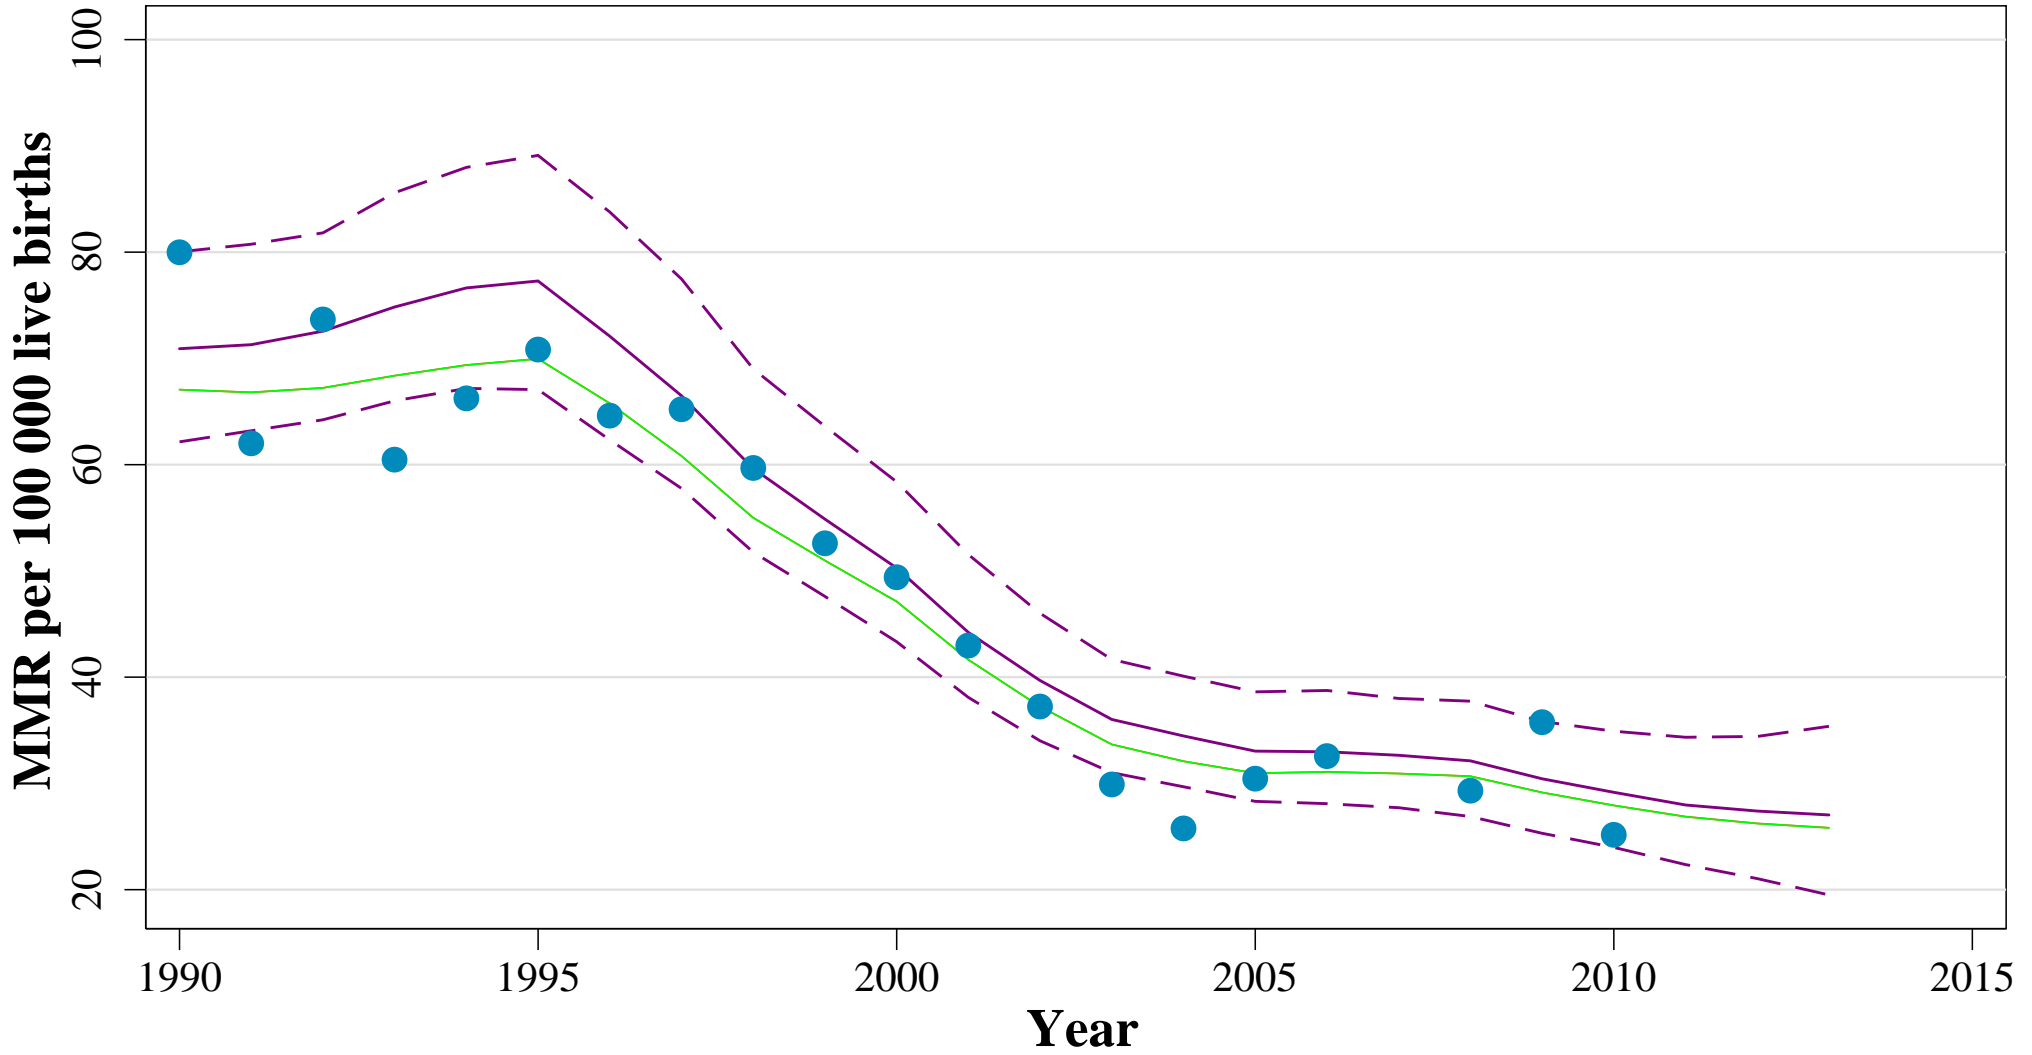

# Kenya

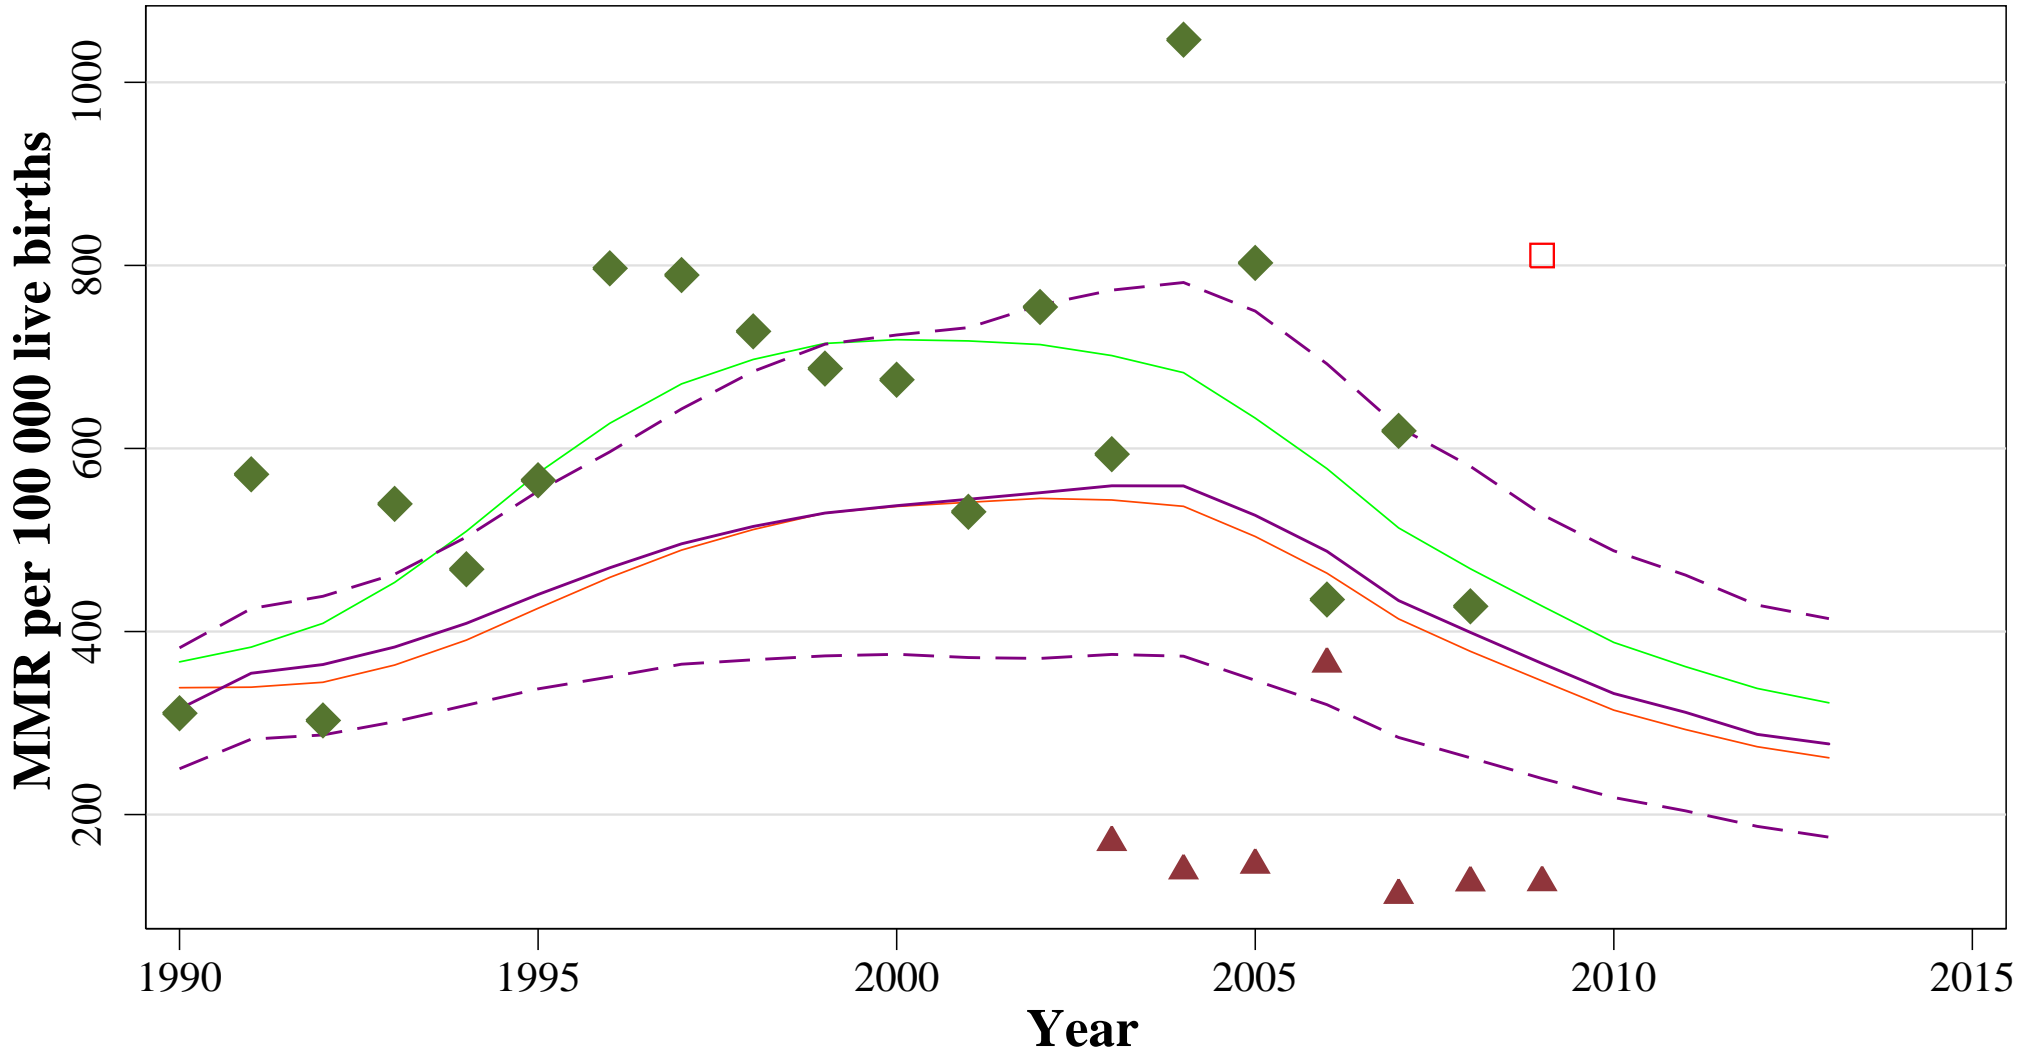

# Kiribati

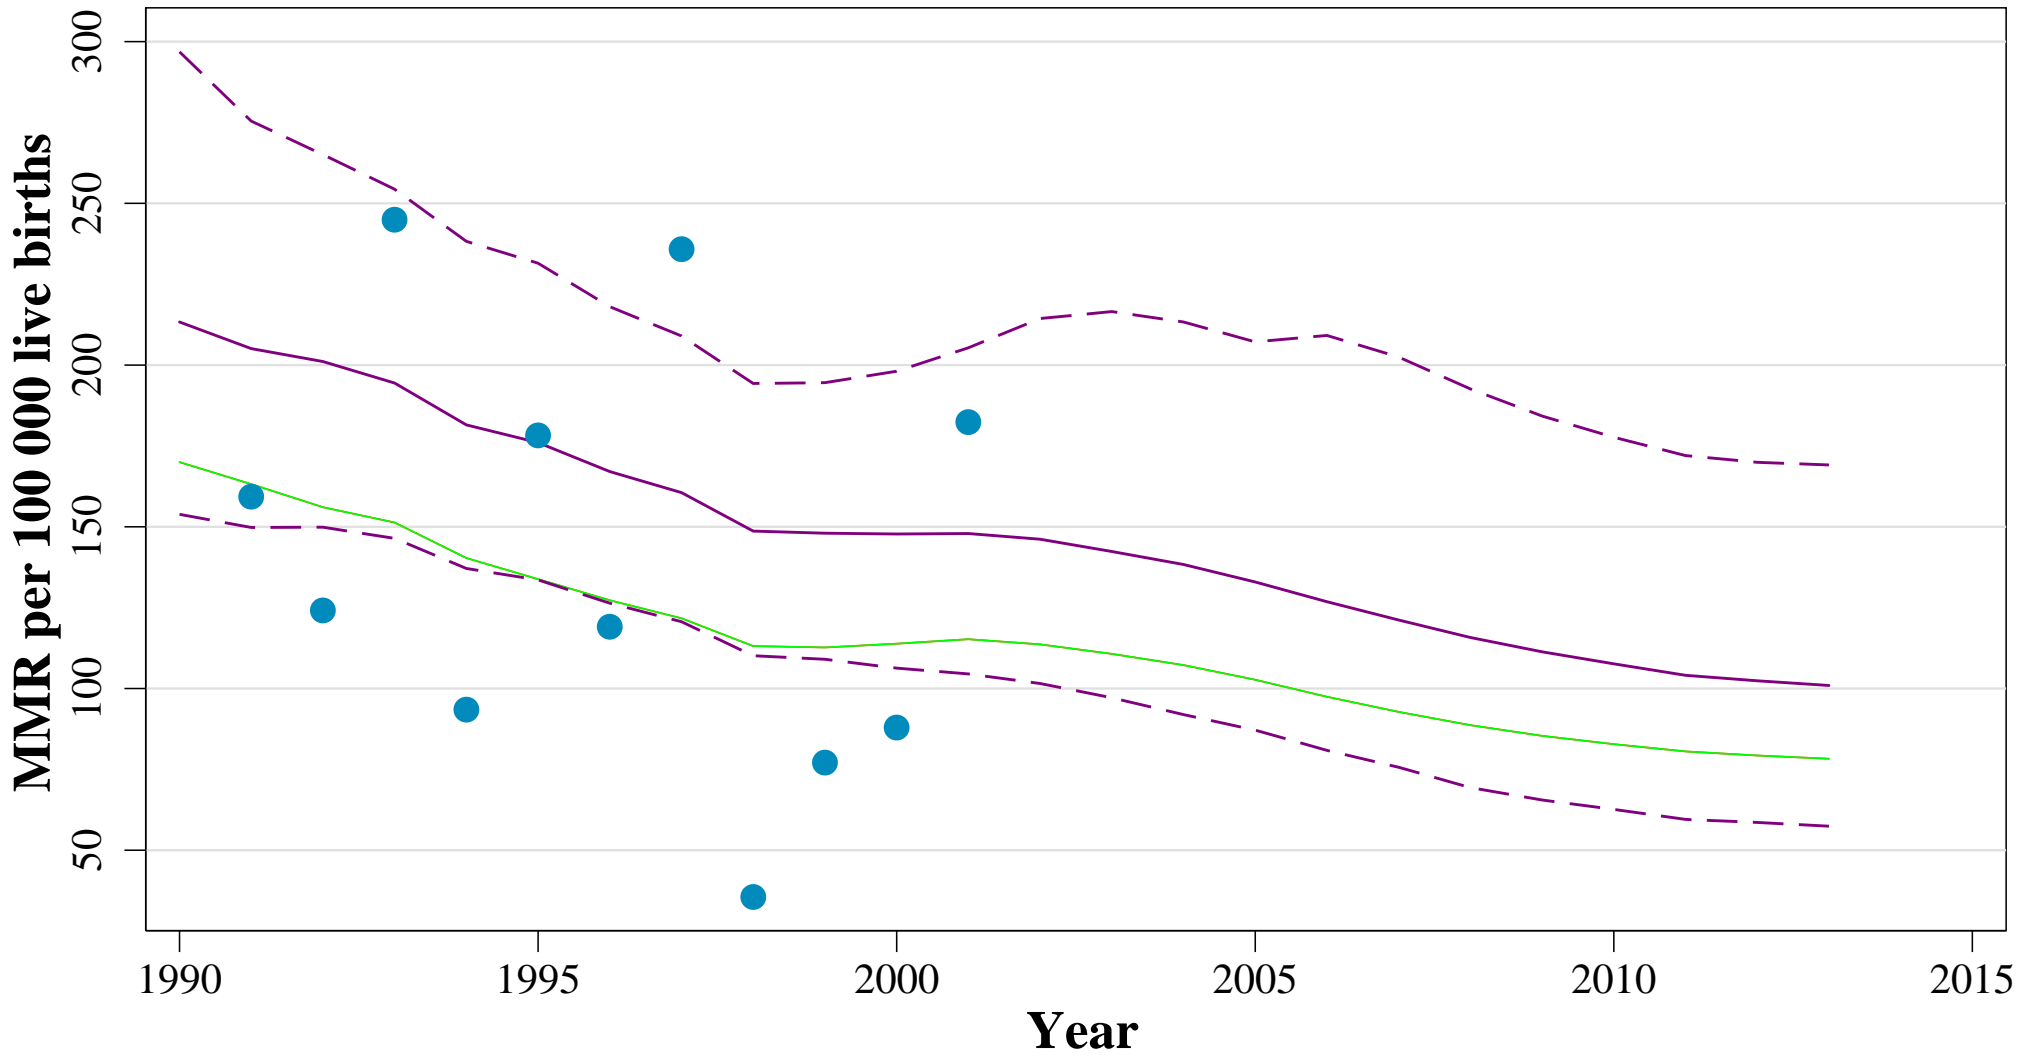



# Kuwait

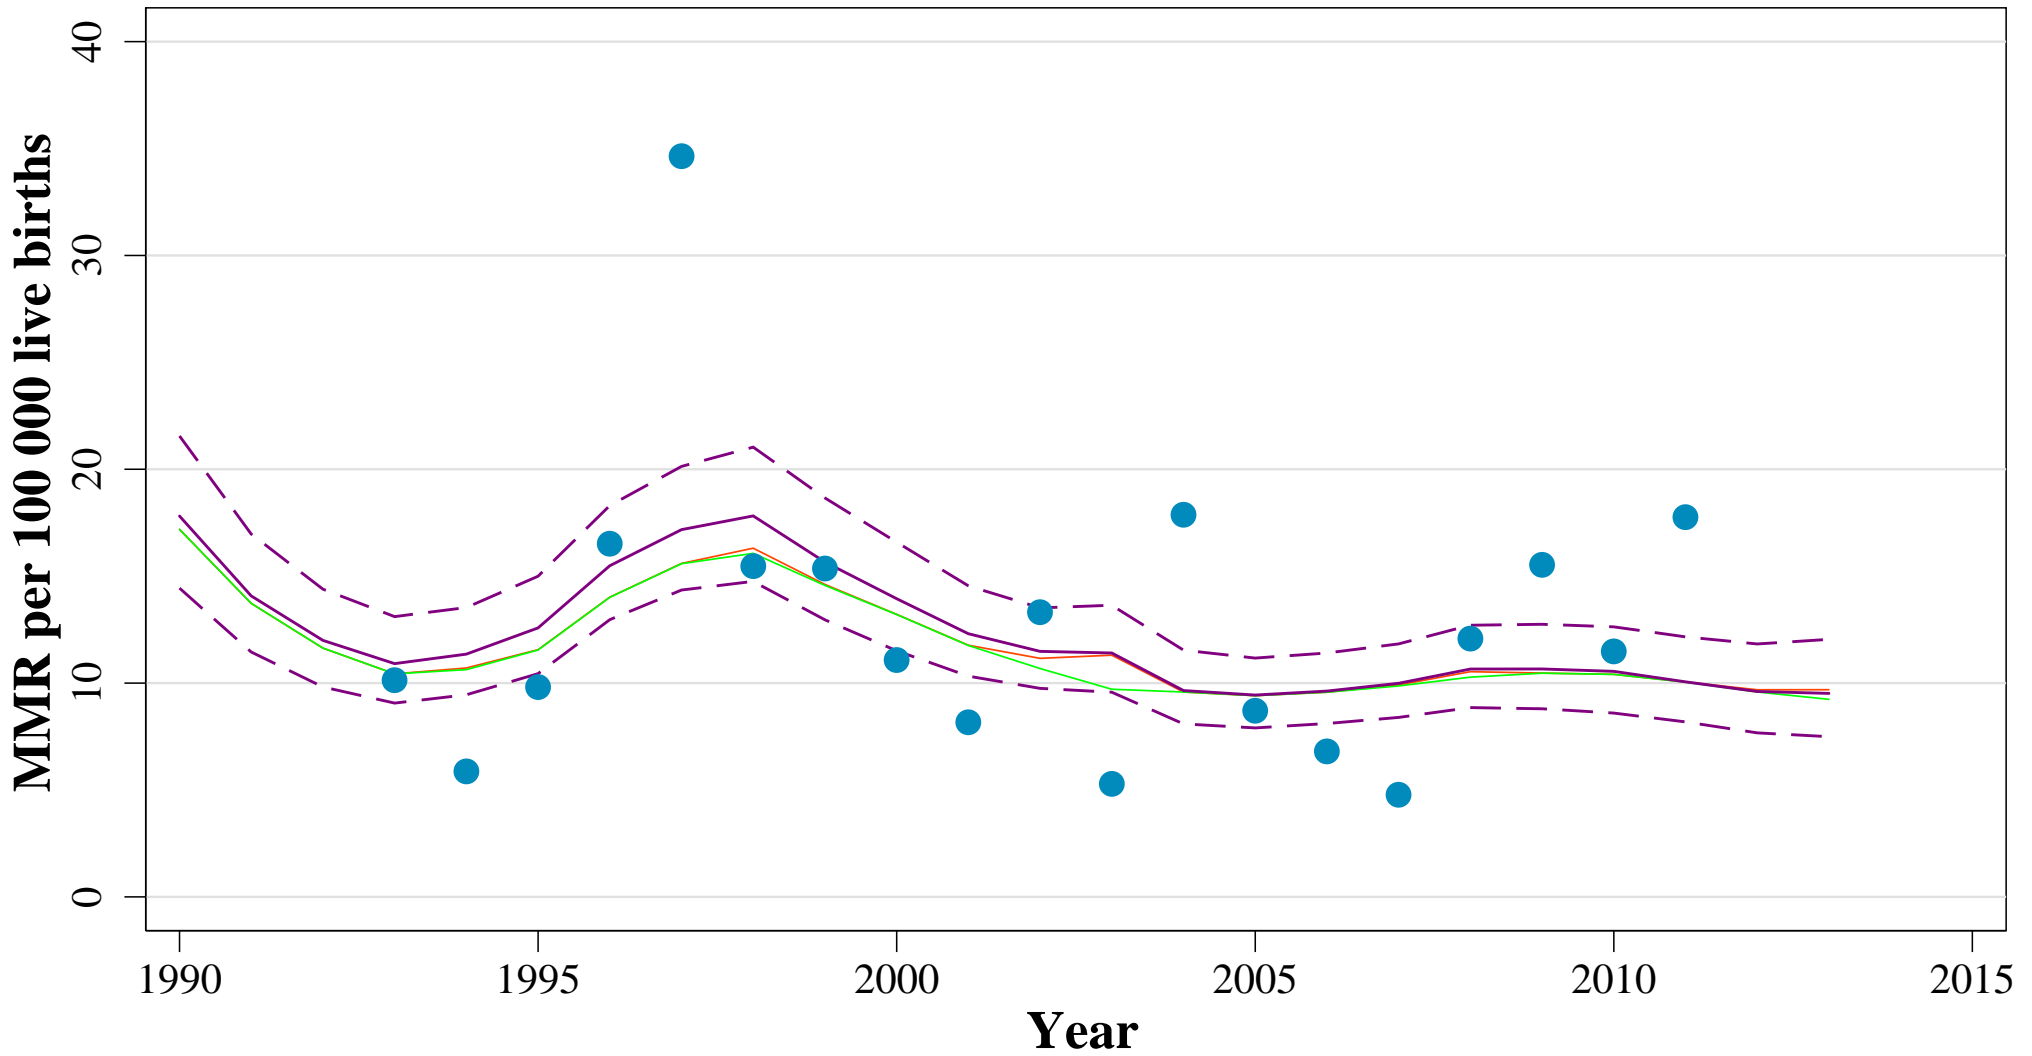

# Kyrgyzstan

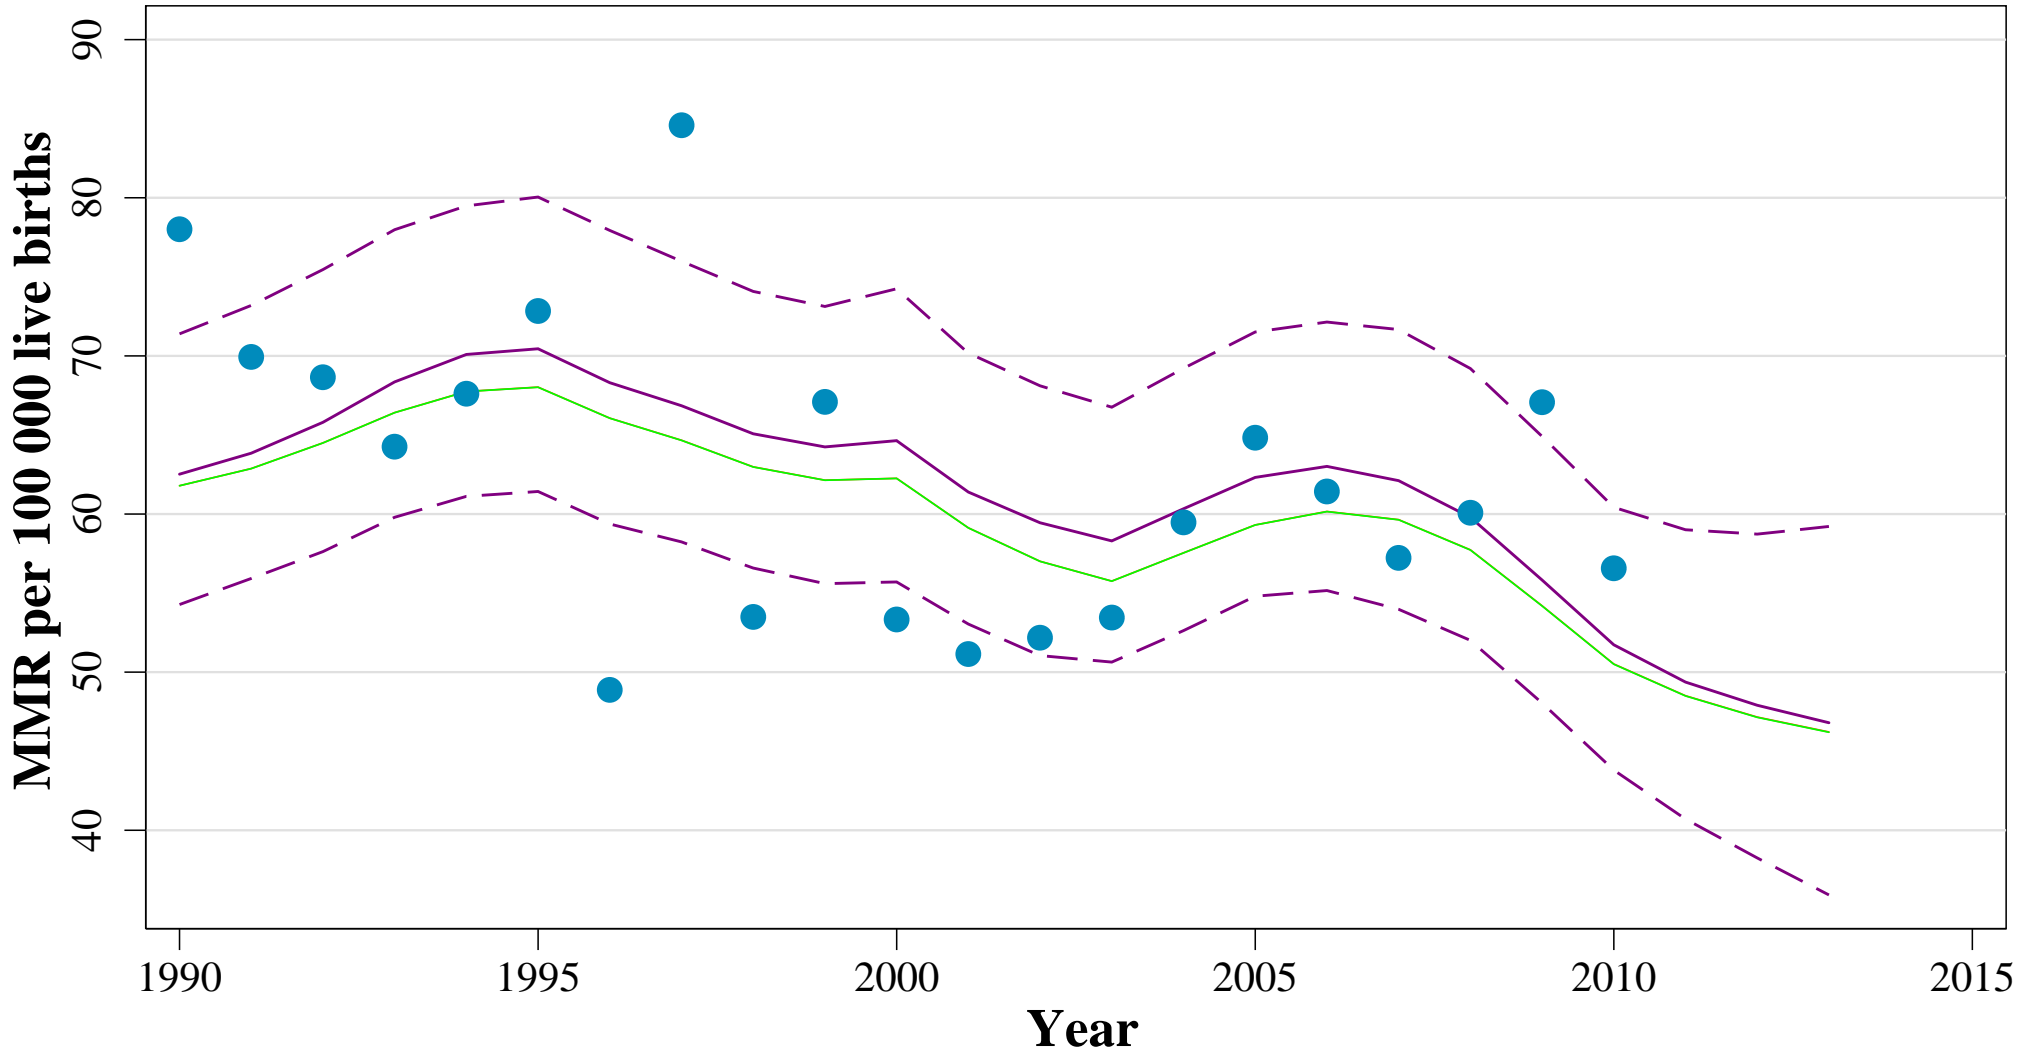

# Laos

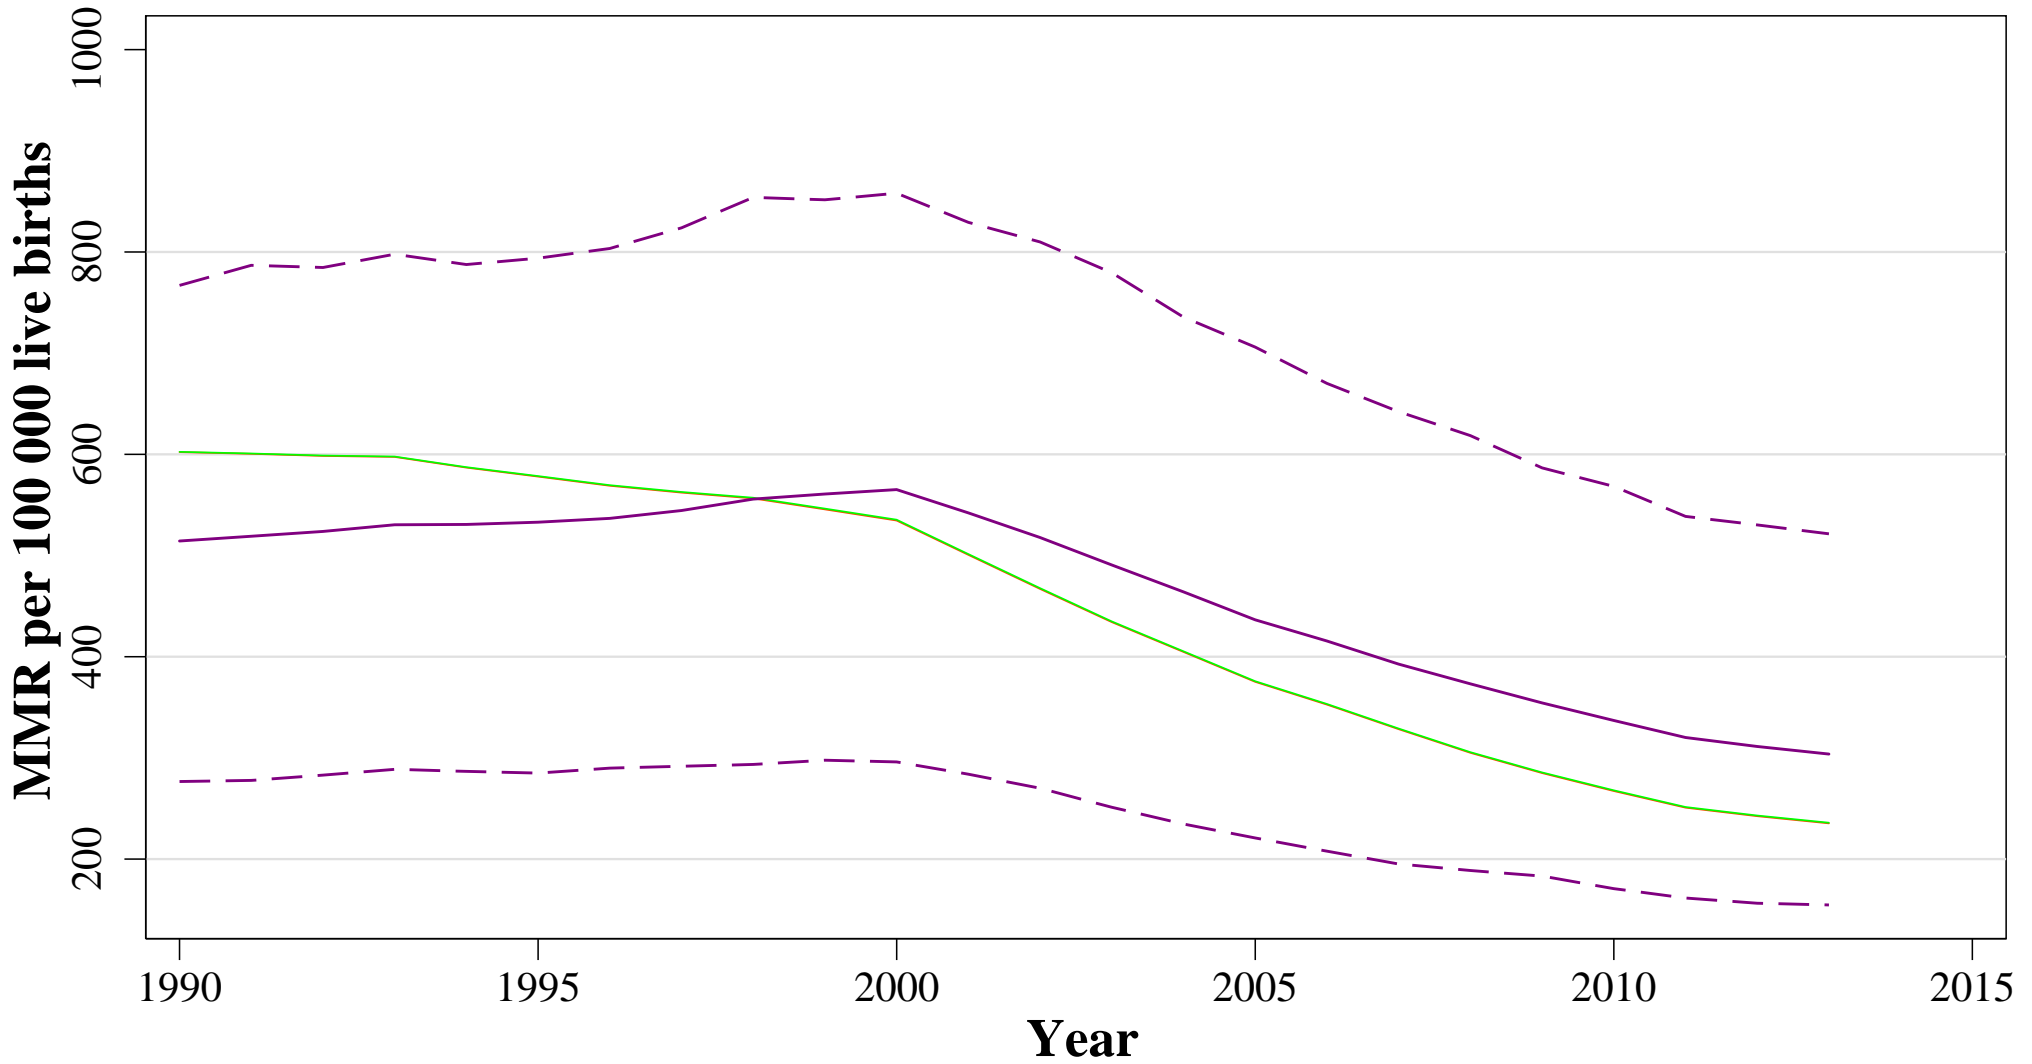

# Latvia

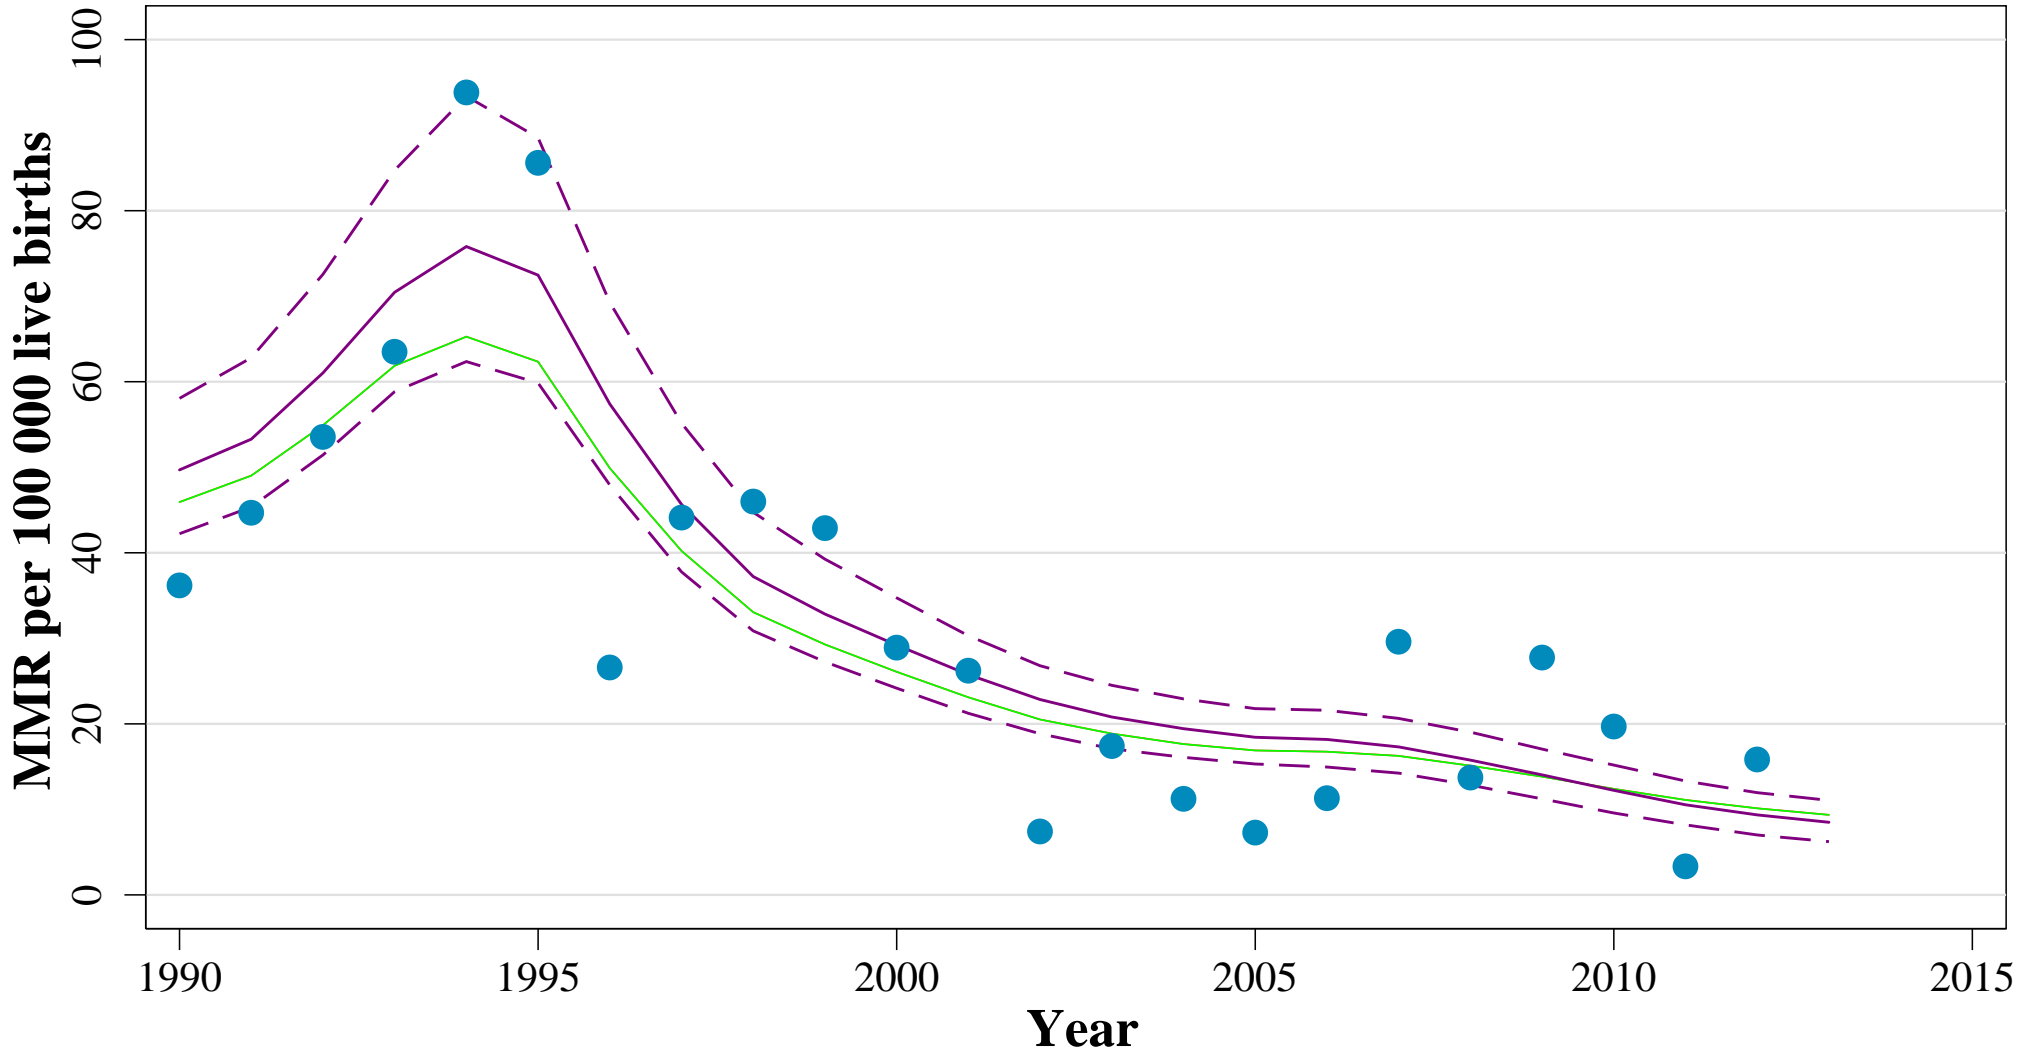

# Lebanon

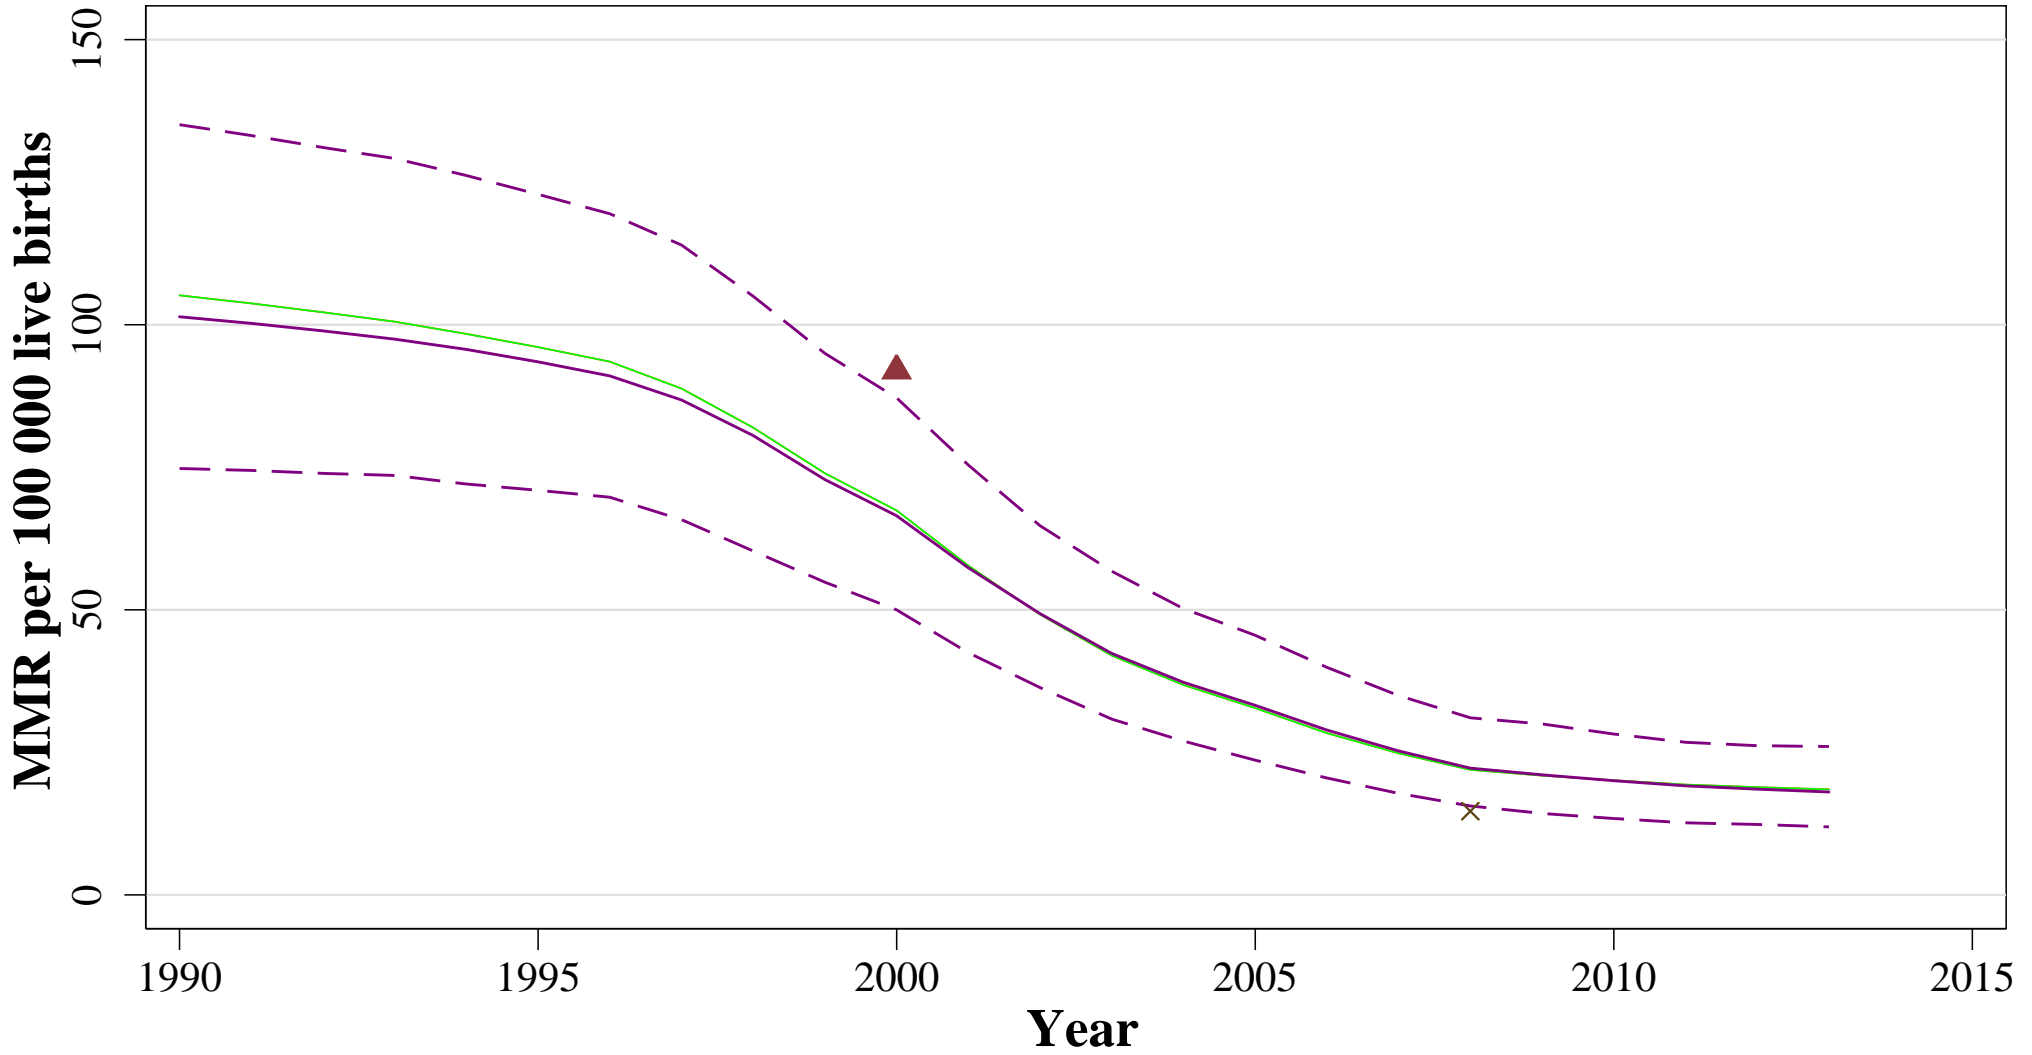

# Lesotho

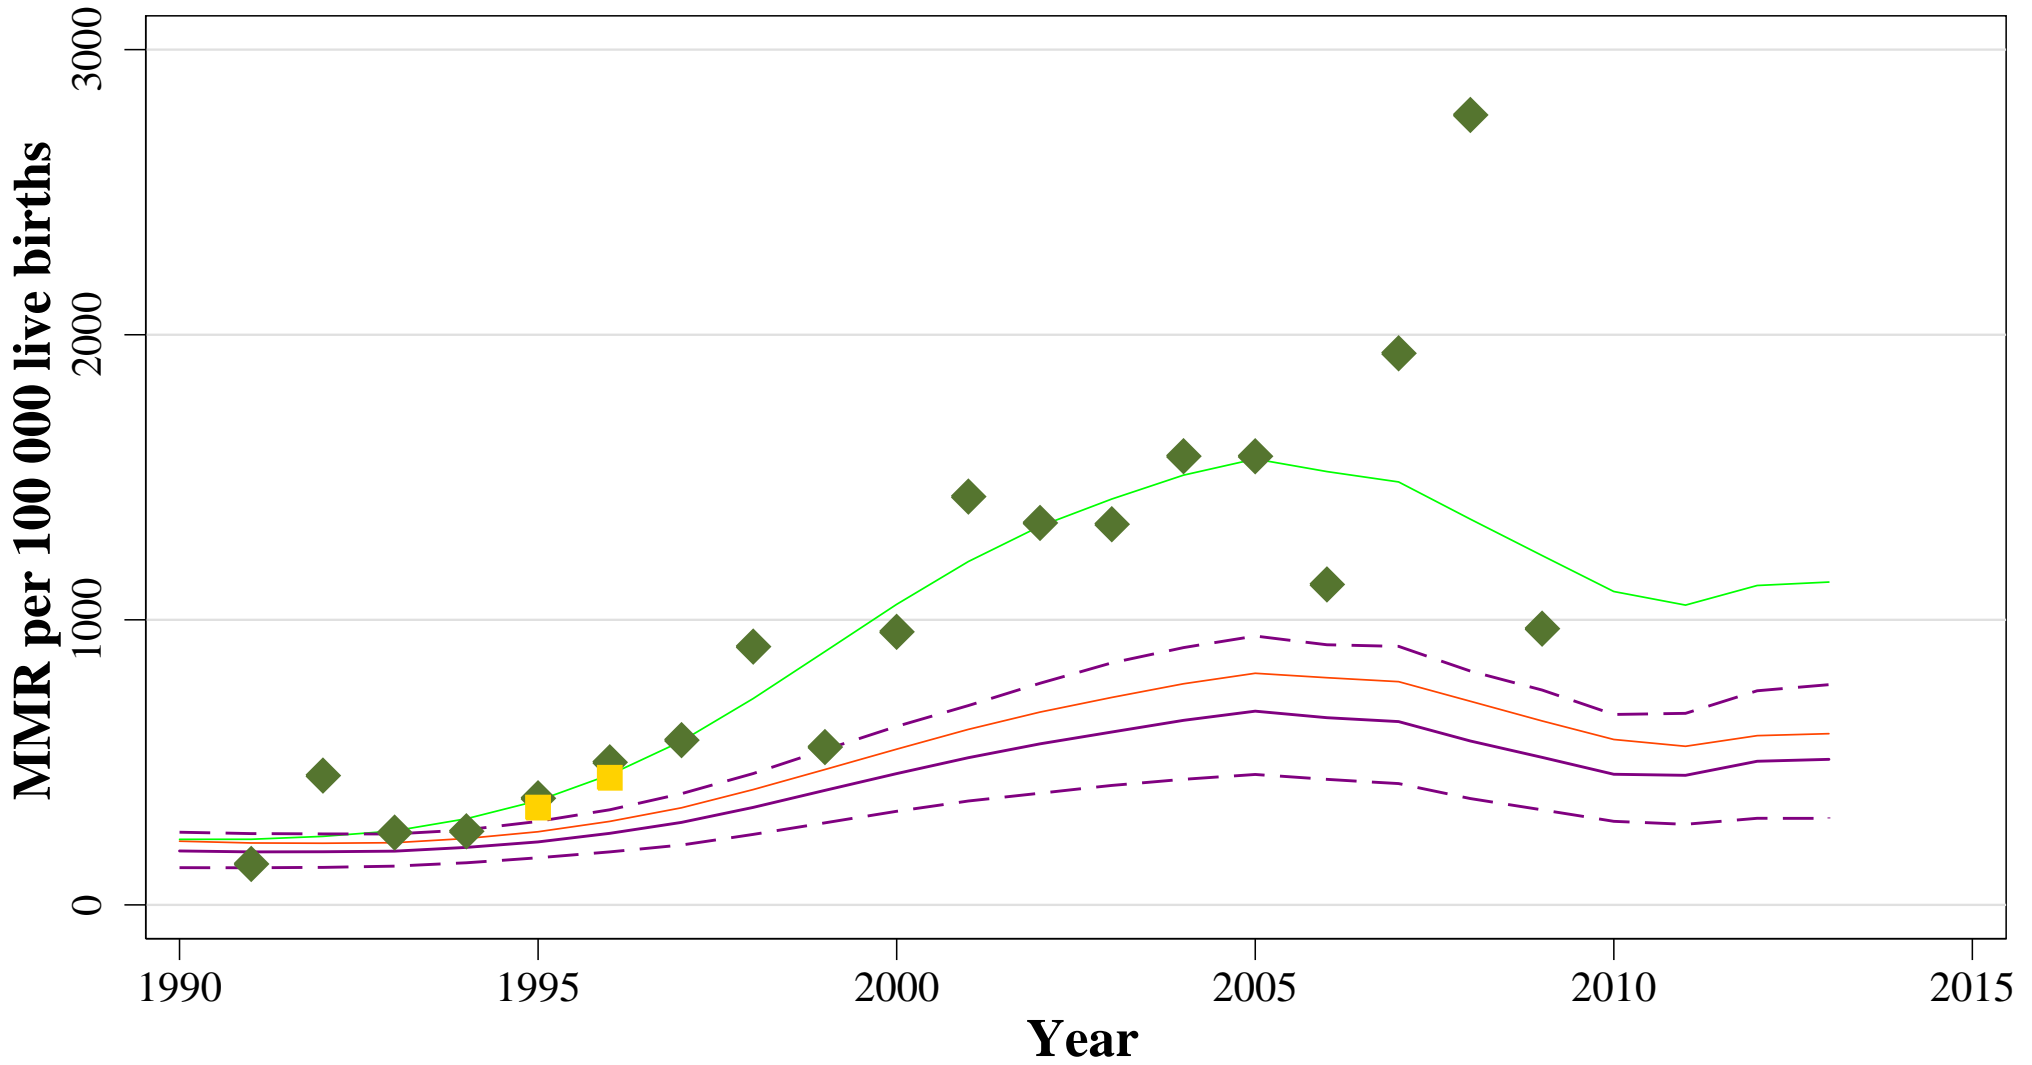

# Liberia

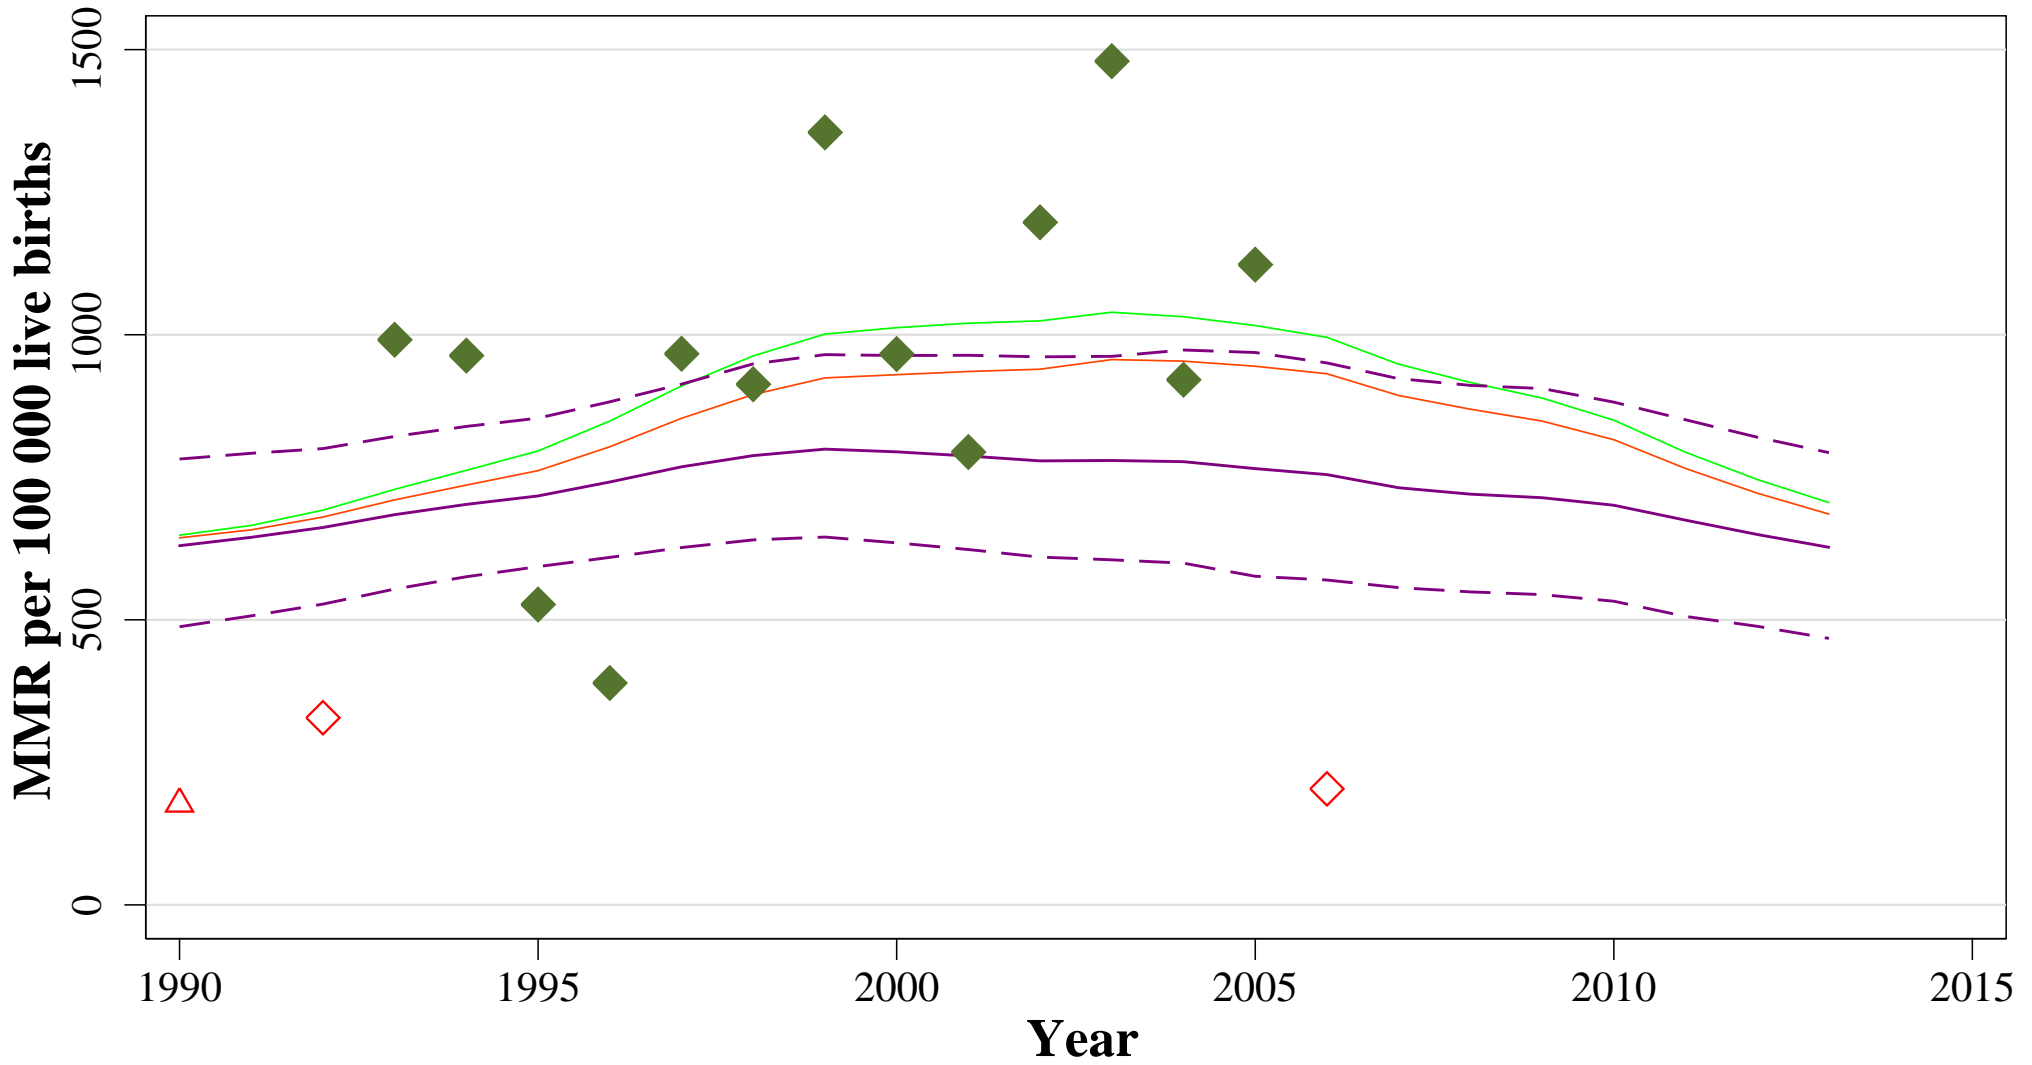

# Libya

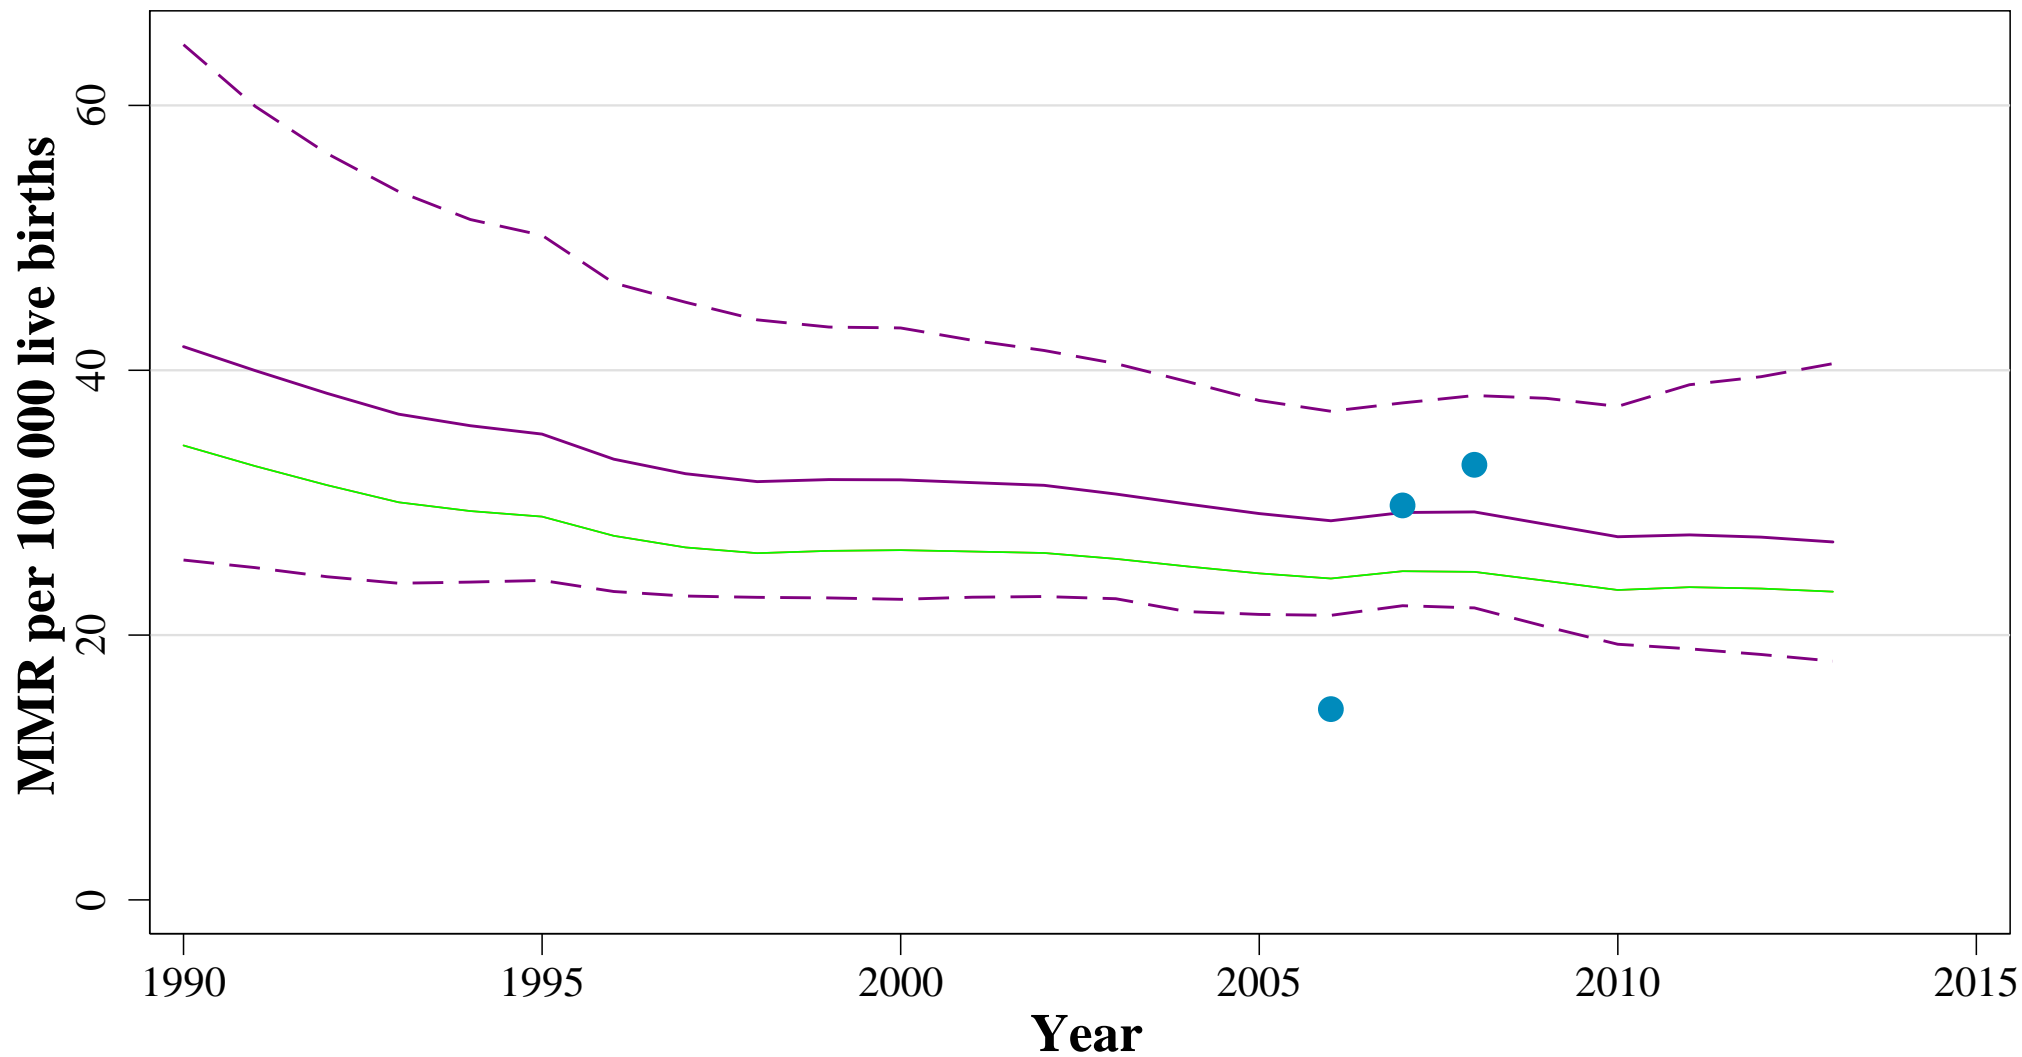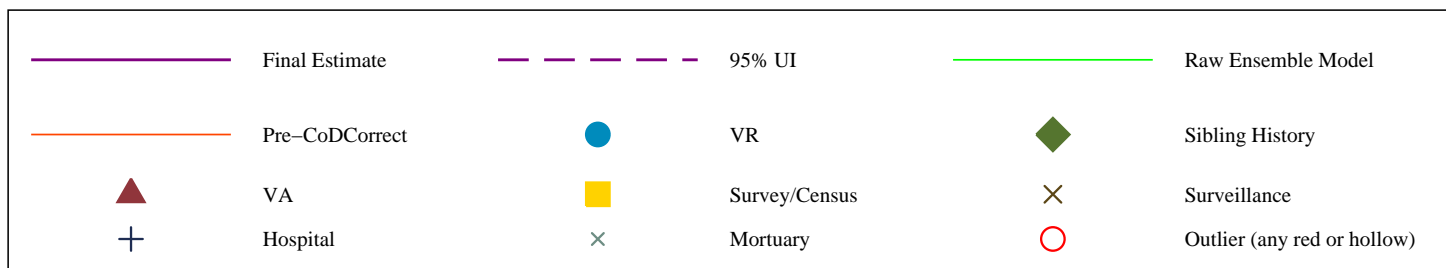



# Lithuania

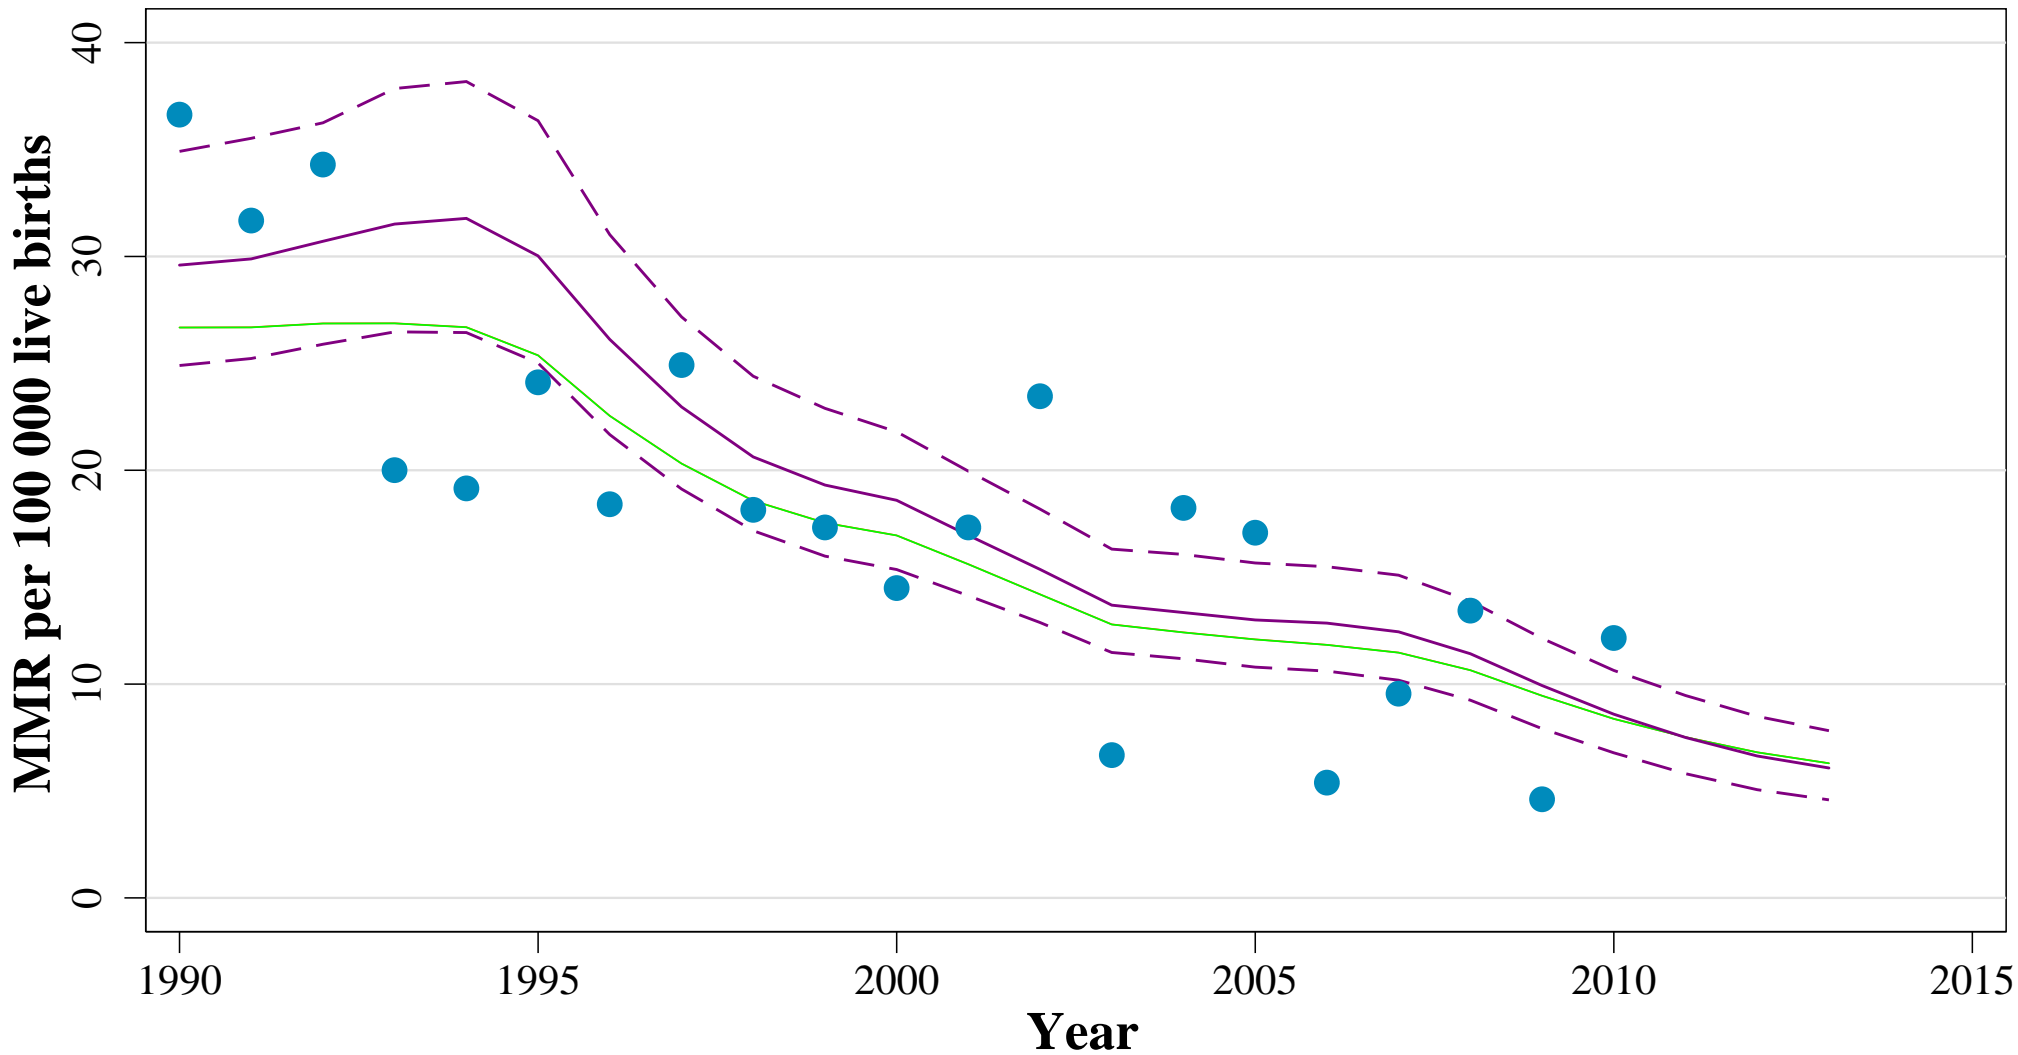

# Luxembourg

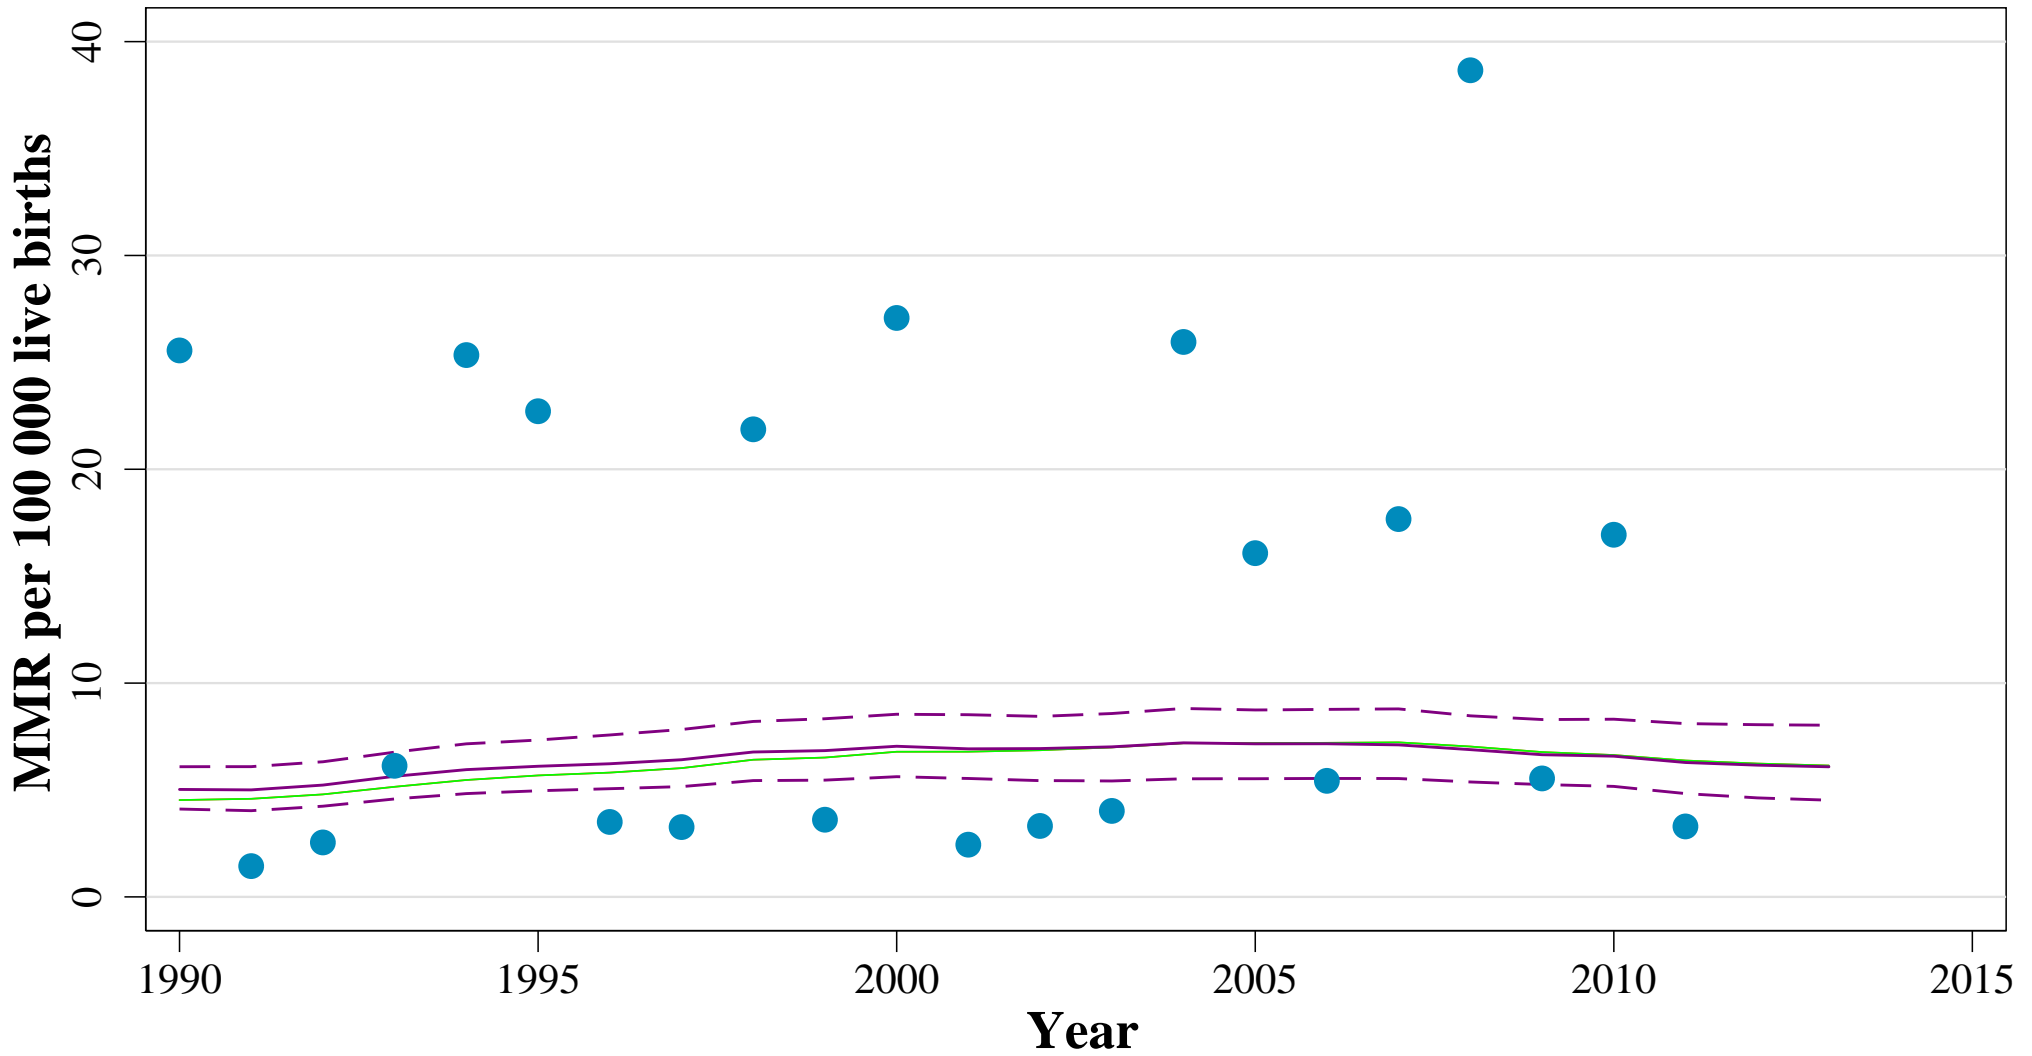

# Macedonia

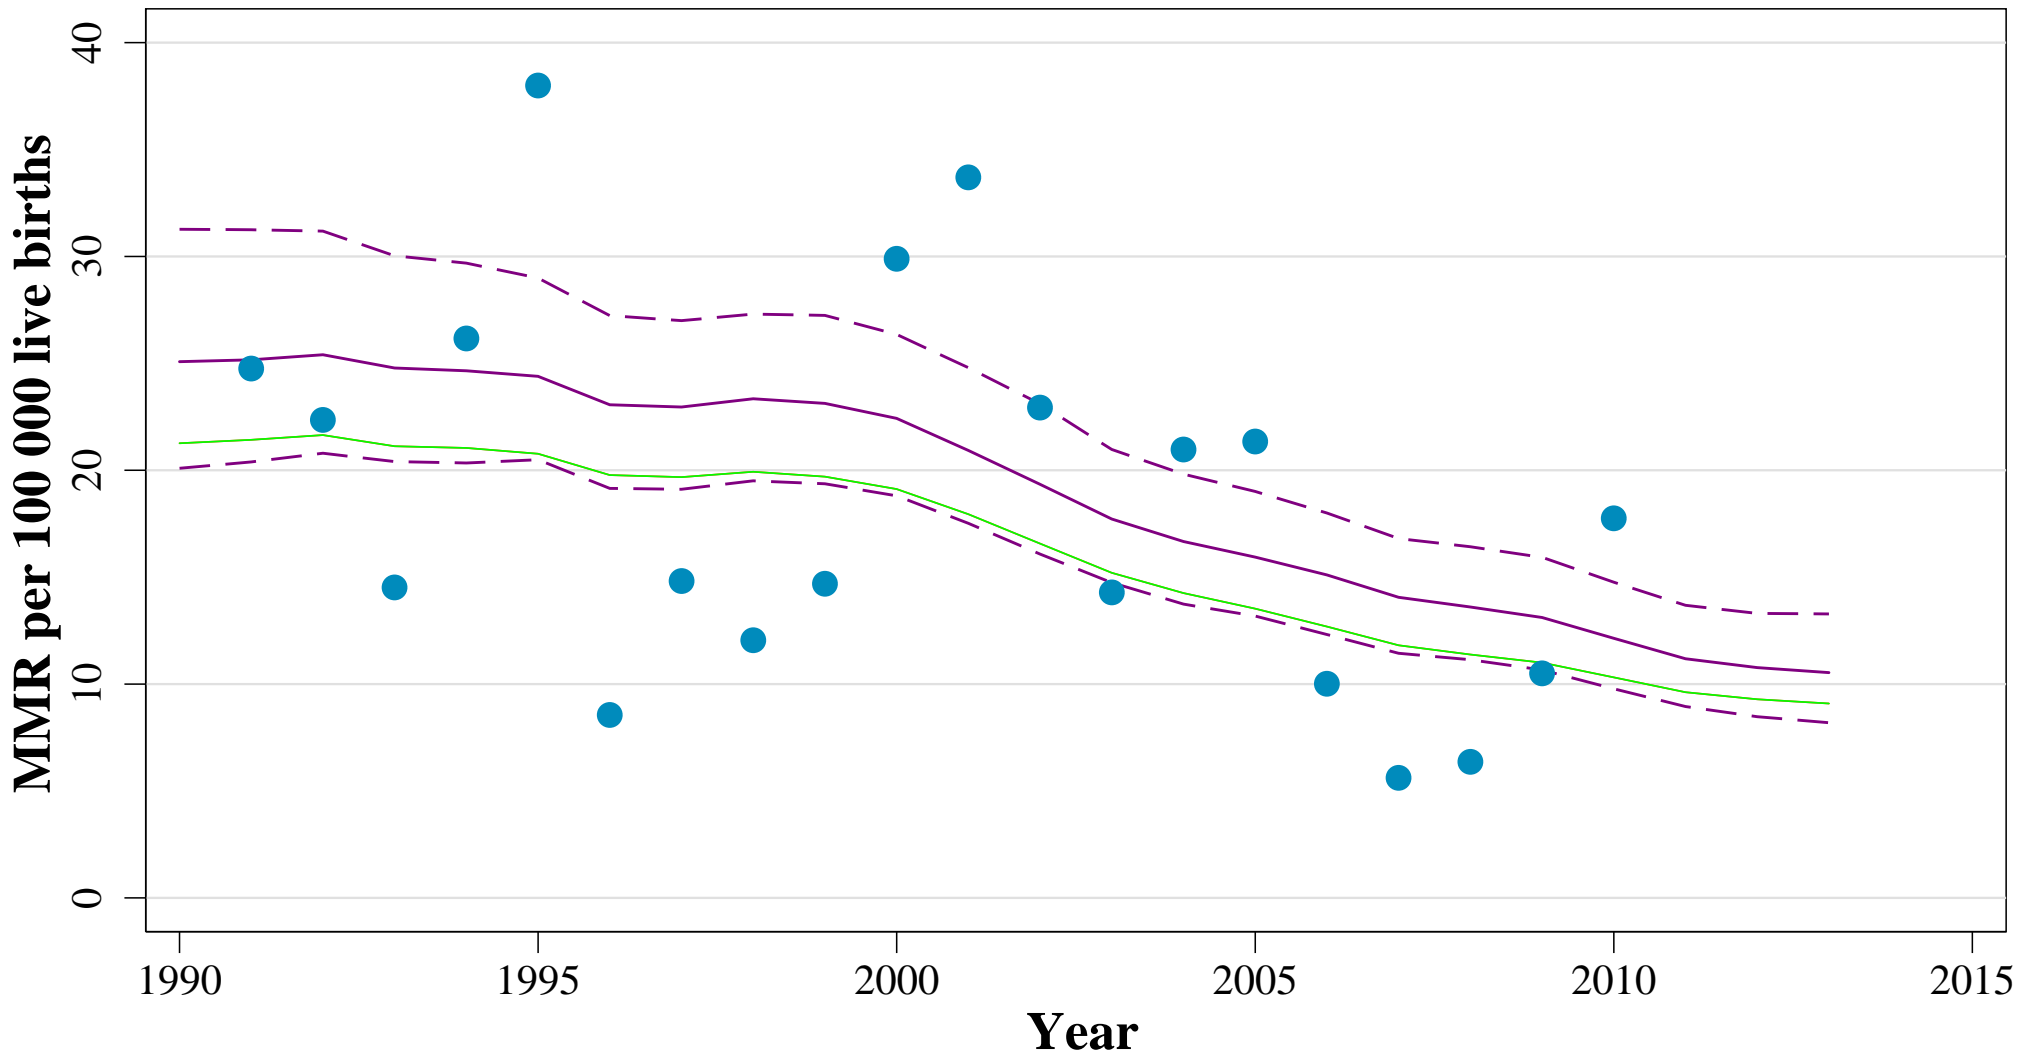

# Madagascar

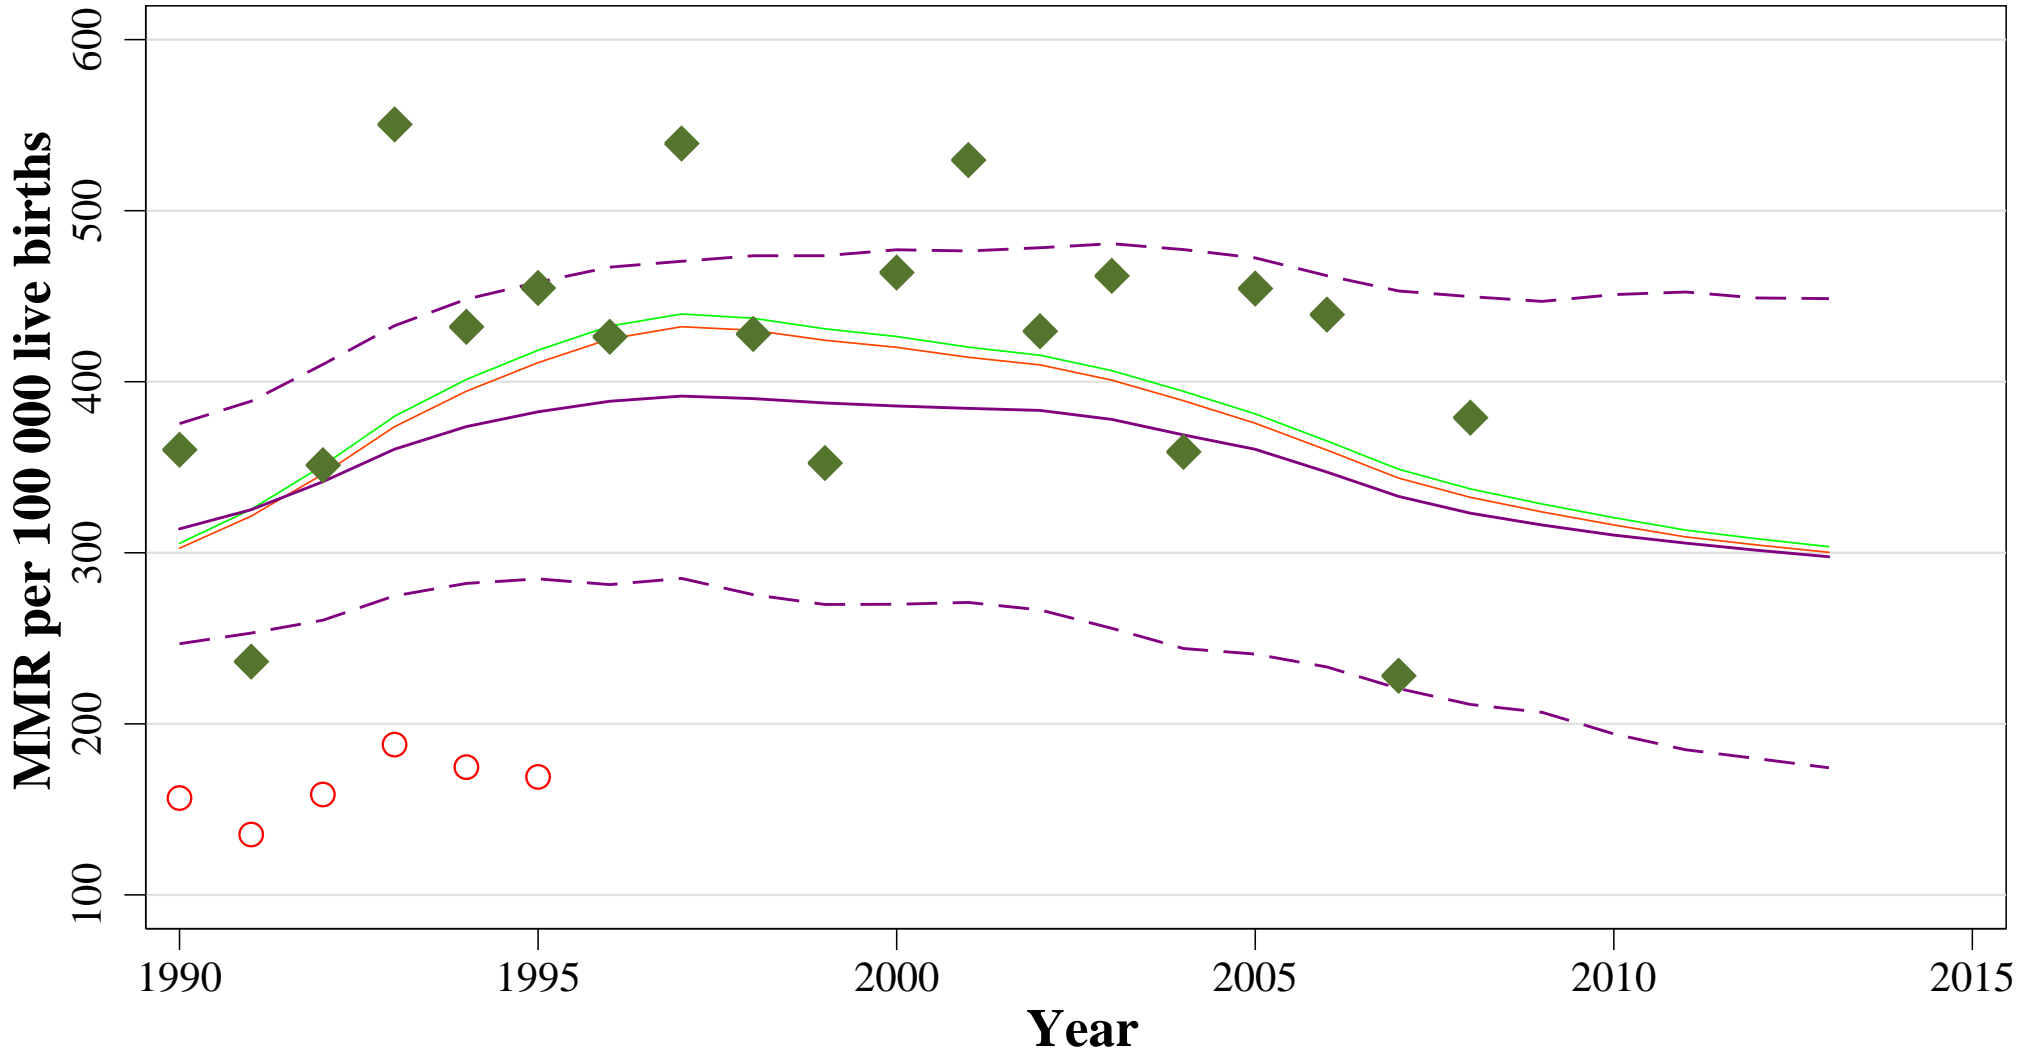

# Malawi

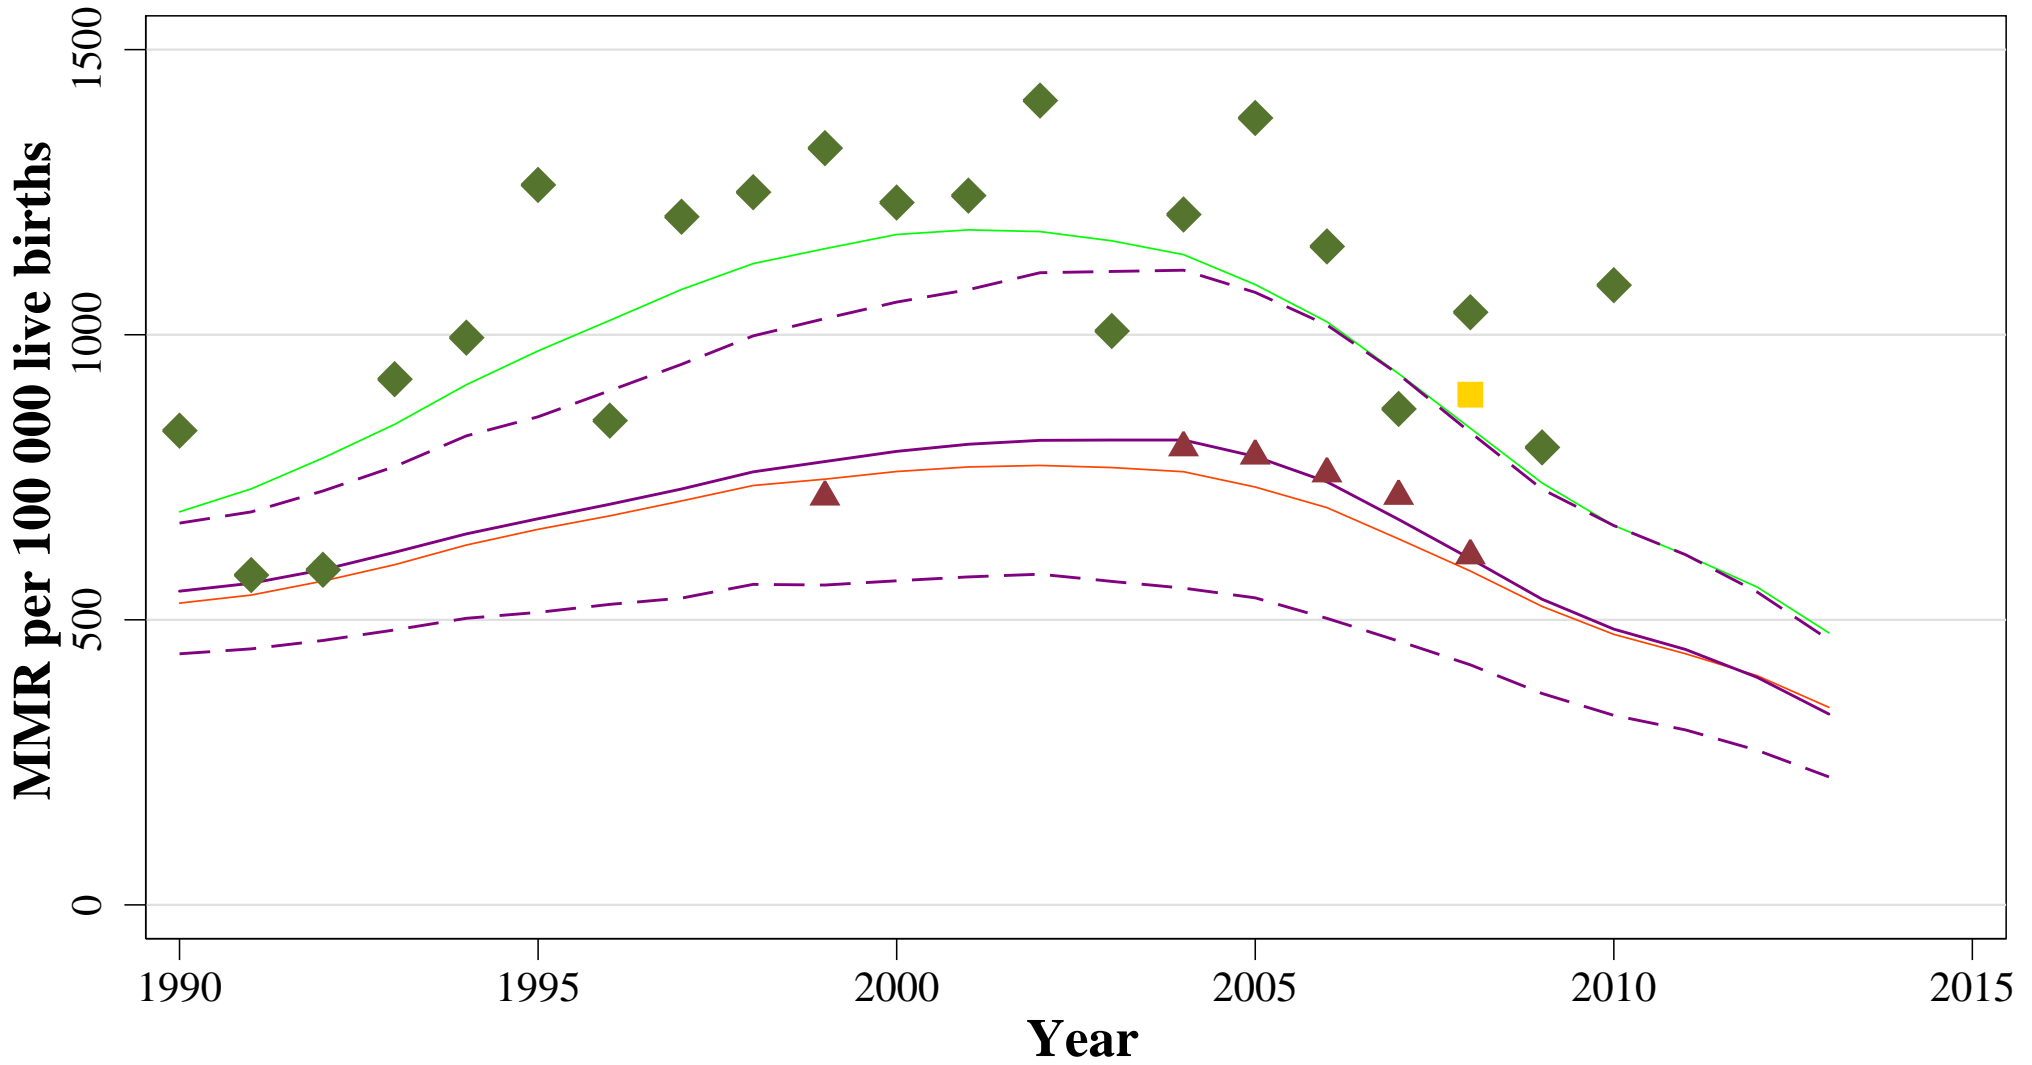

# Malaysia

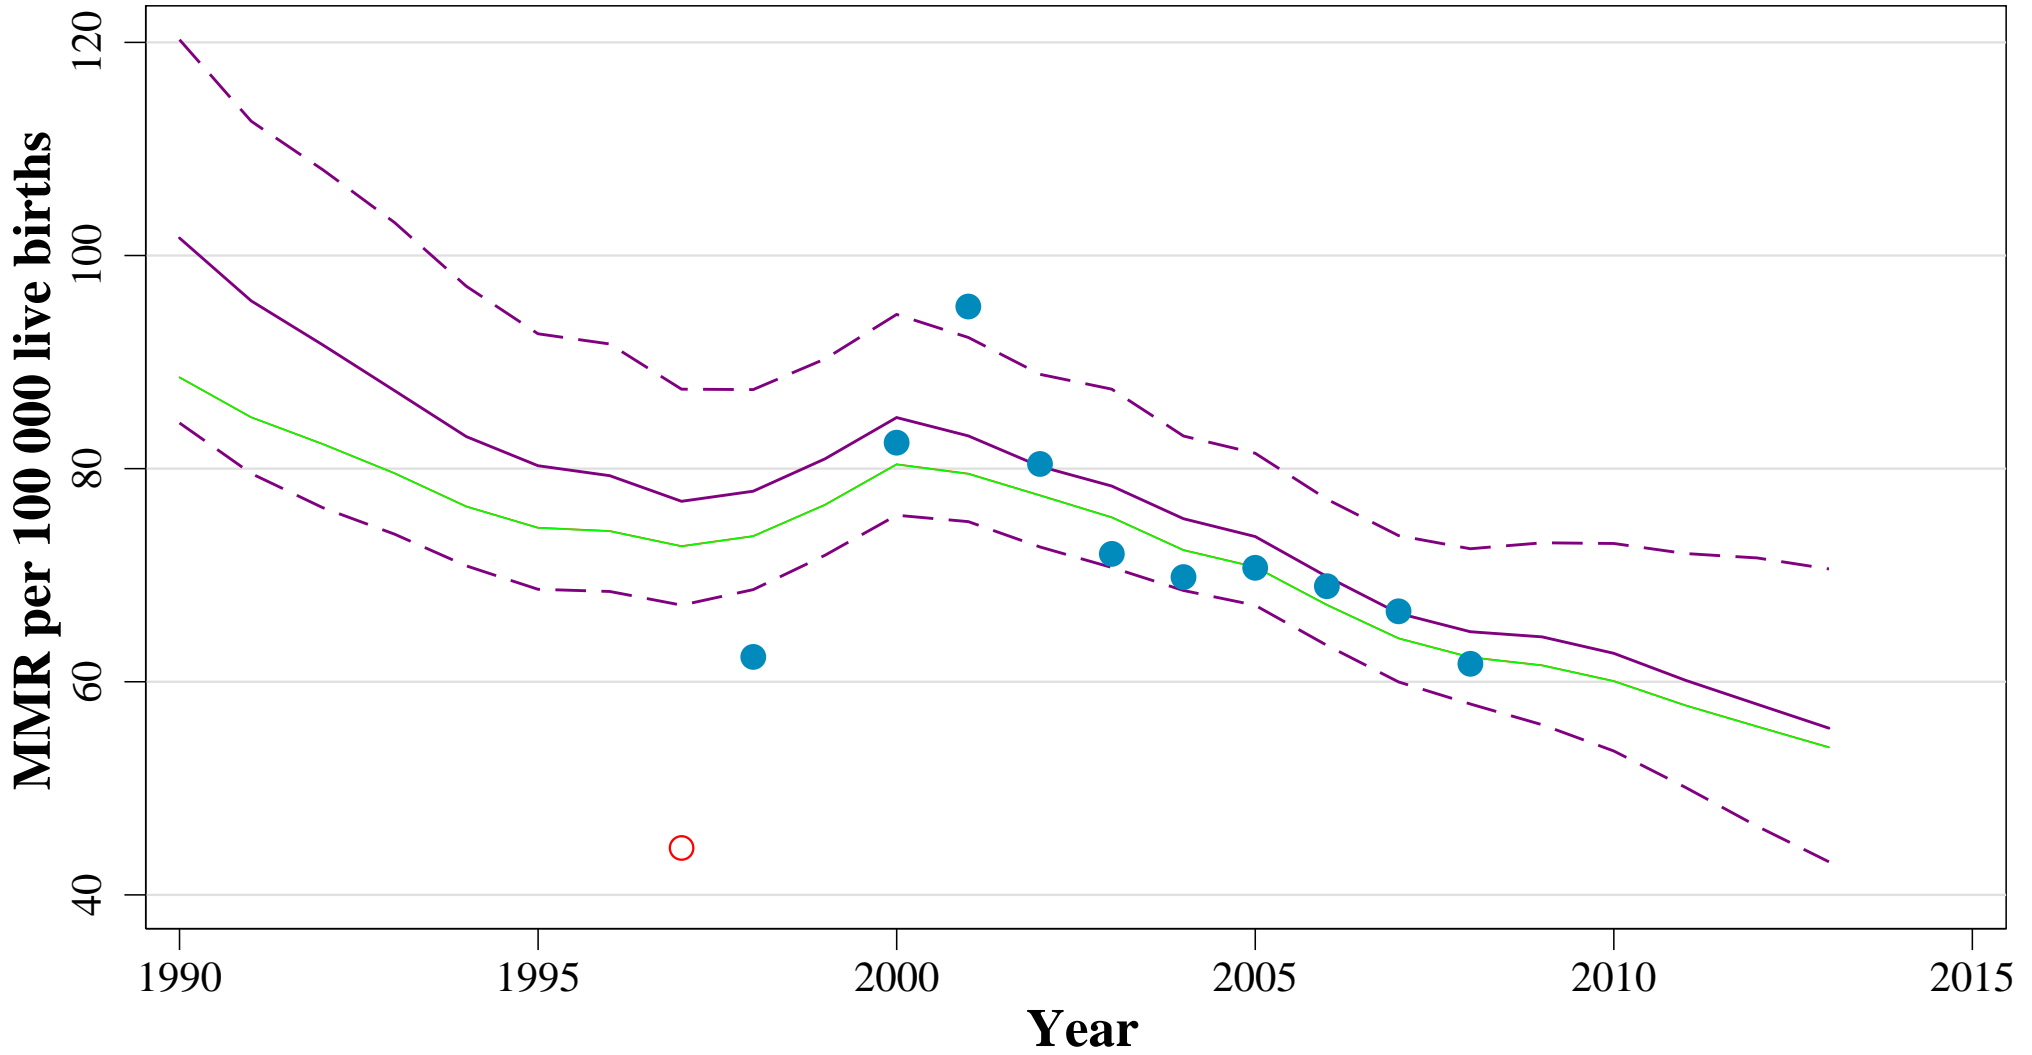

# Maldives

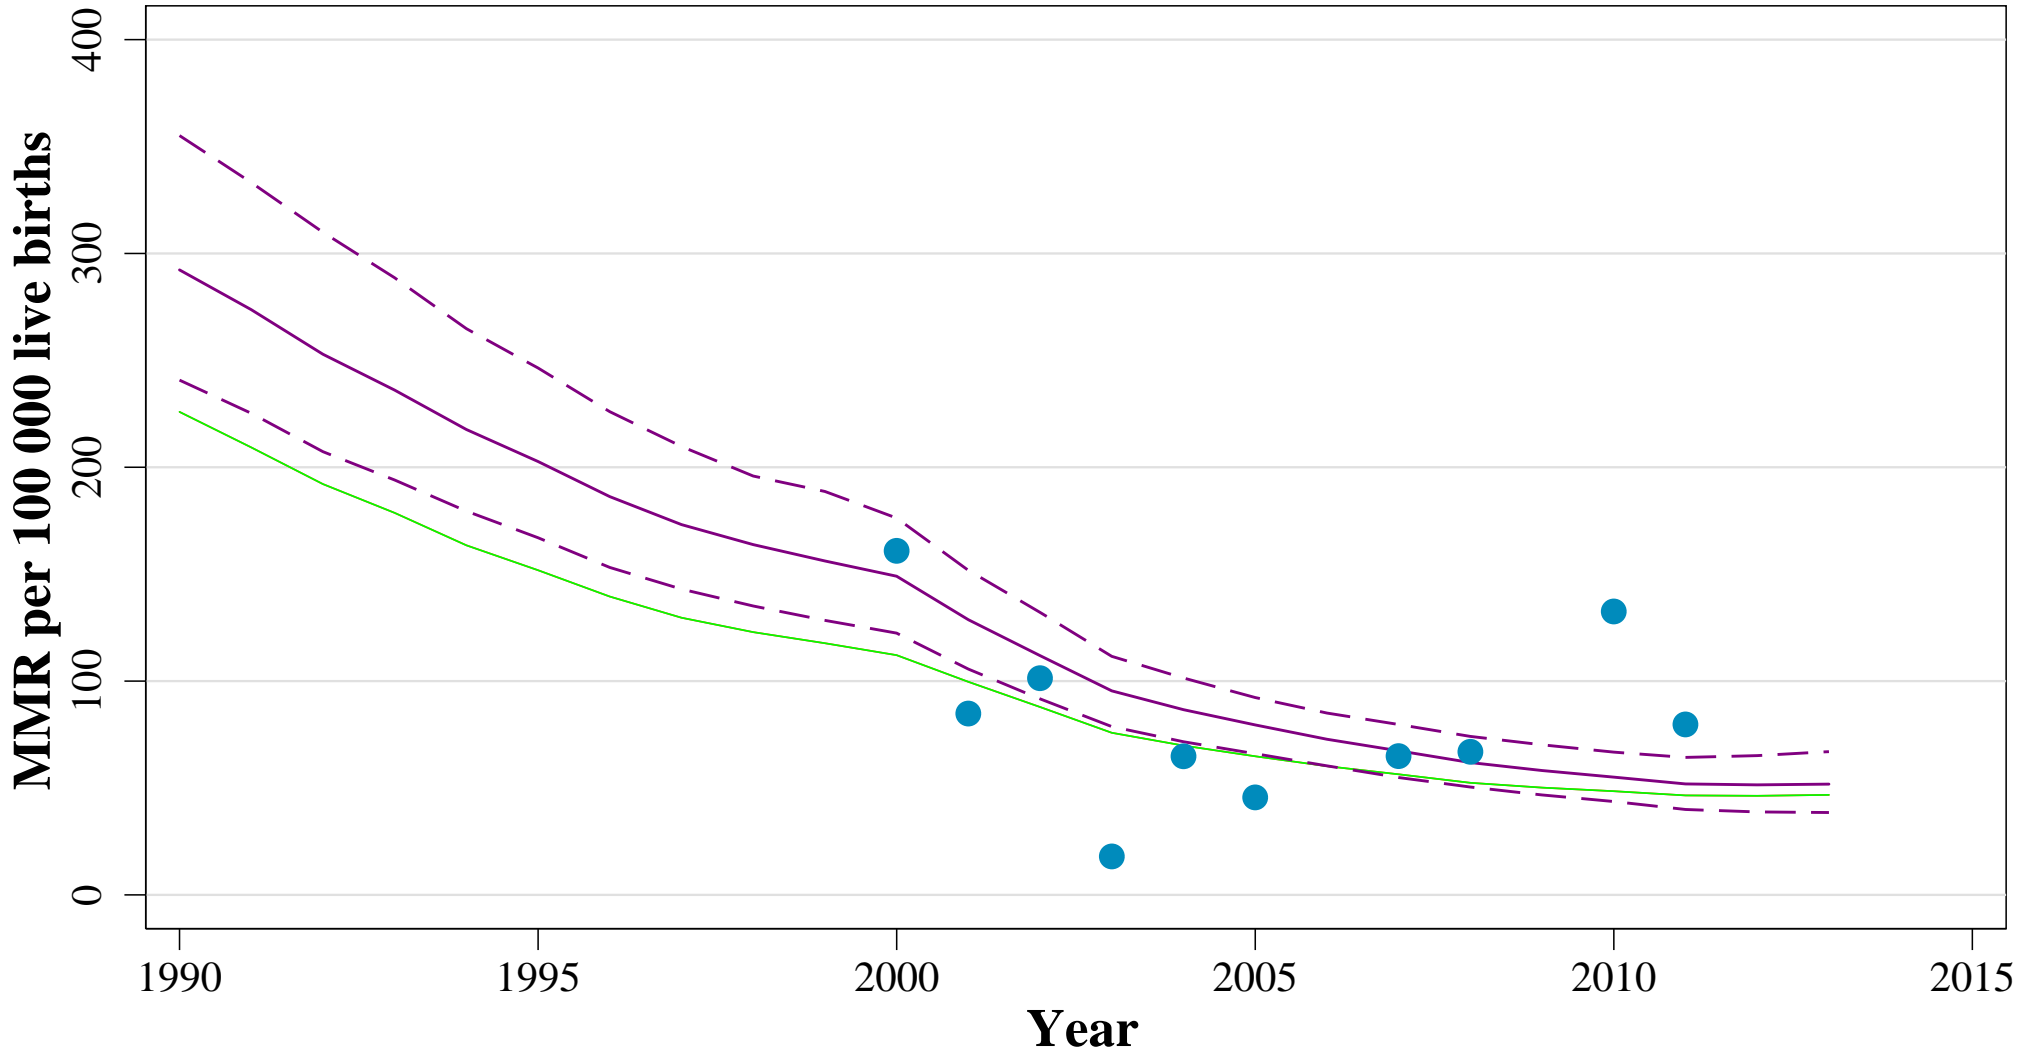

# Mali

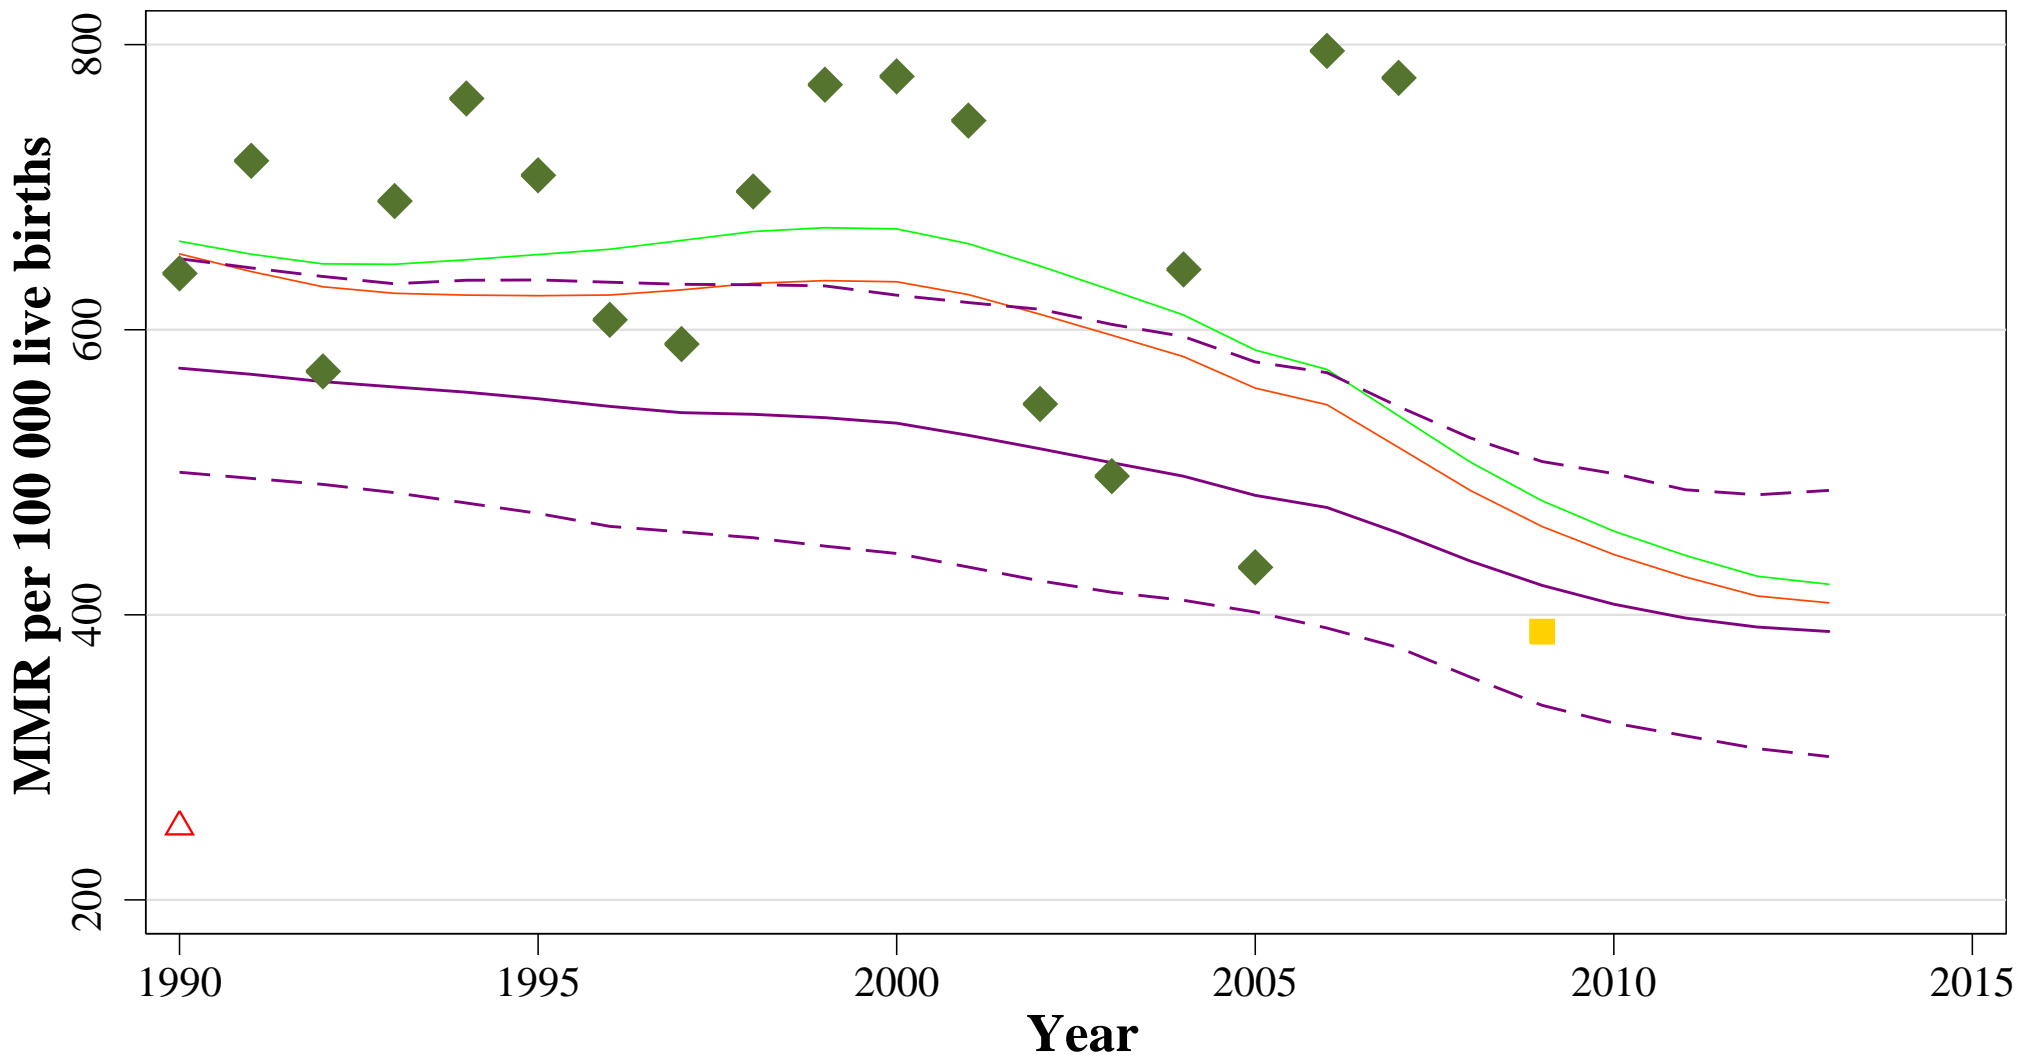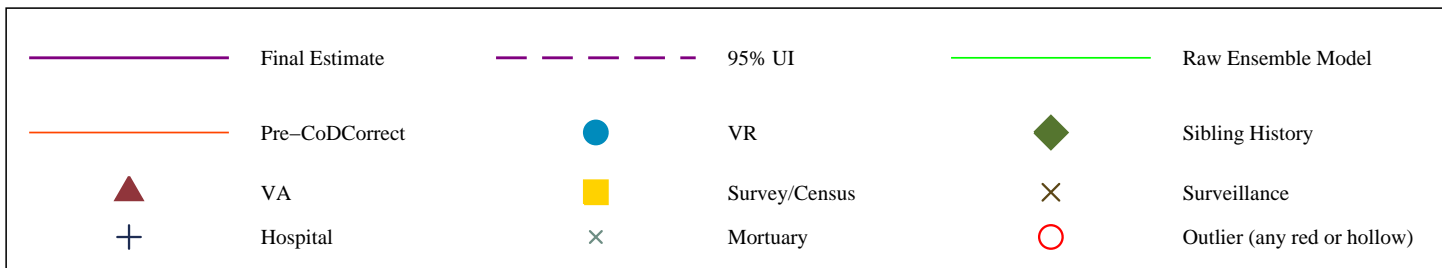



# Malta

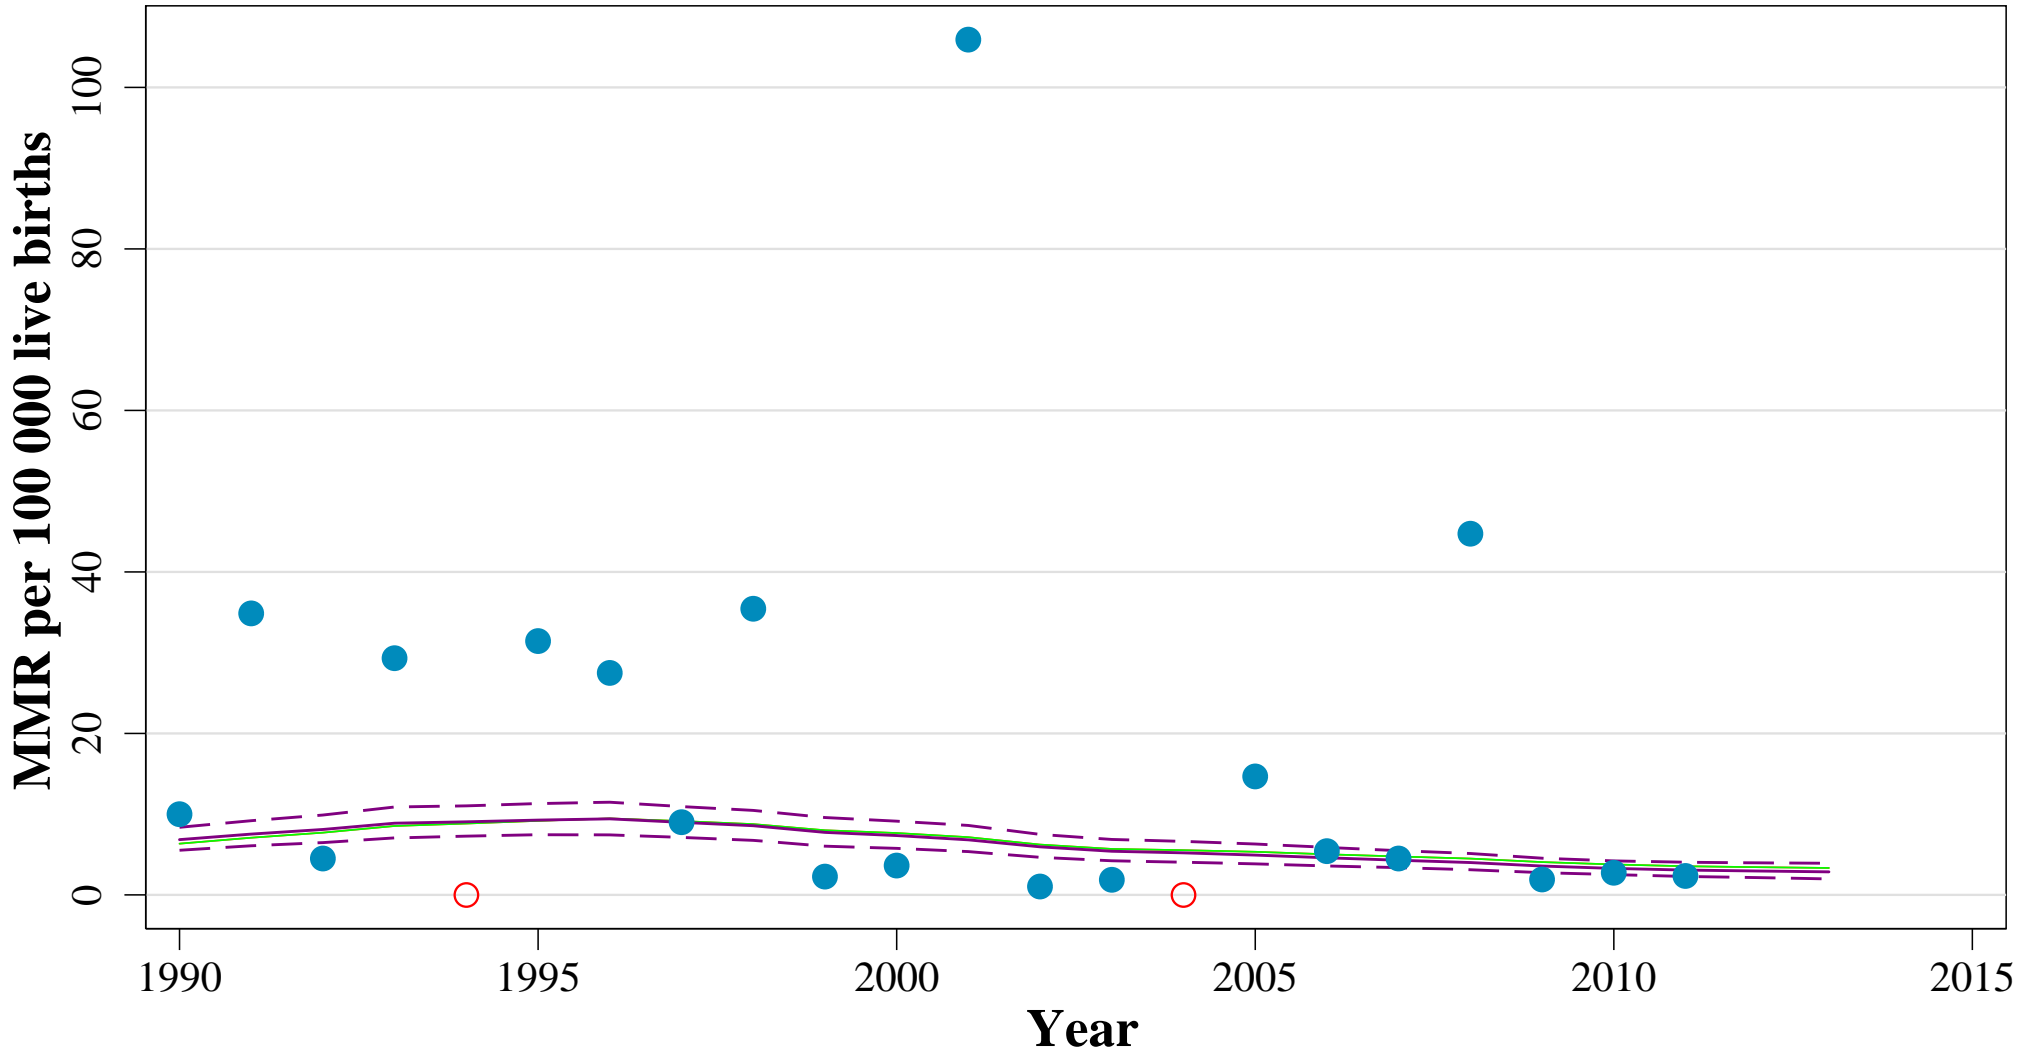

# Mauritania

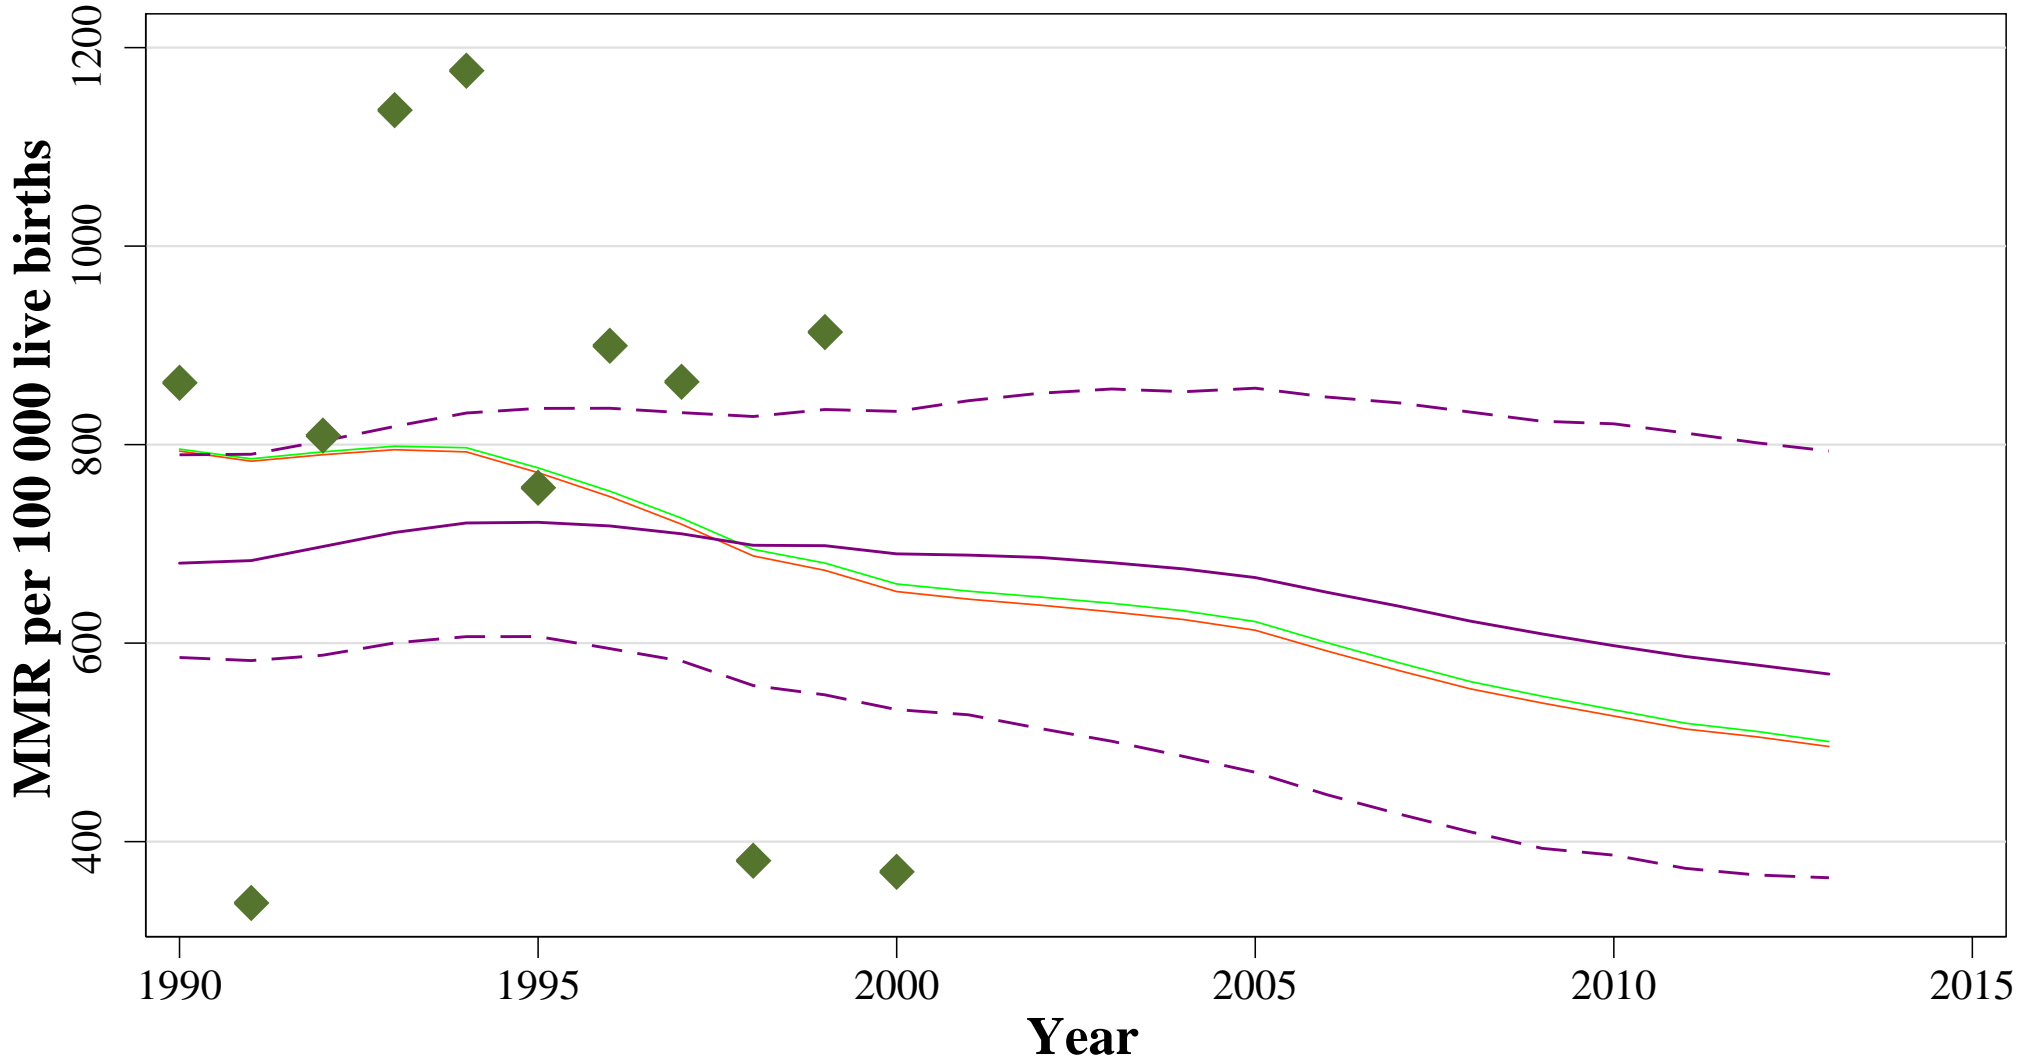

# Mauritius

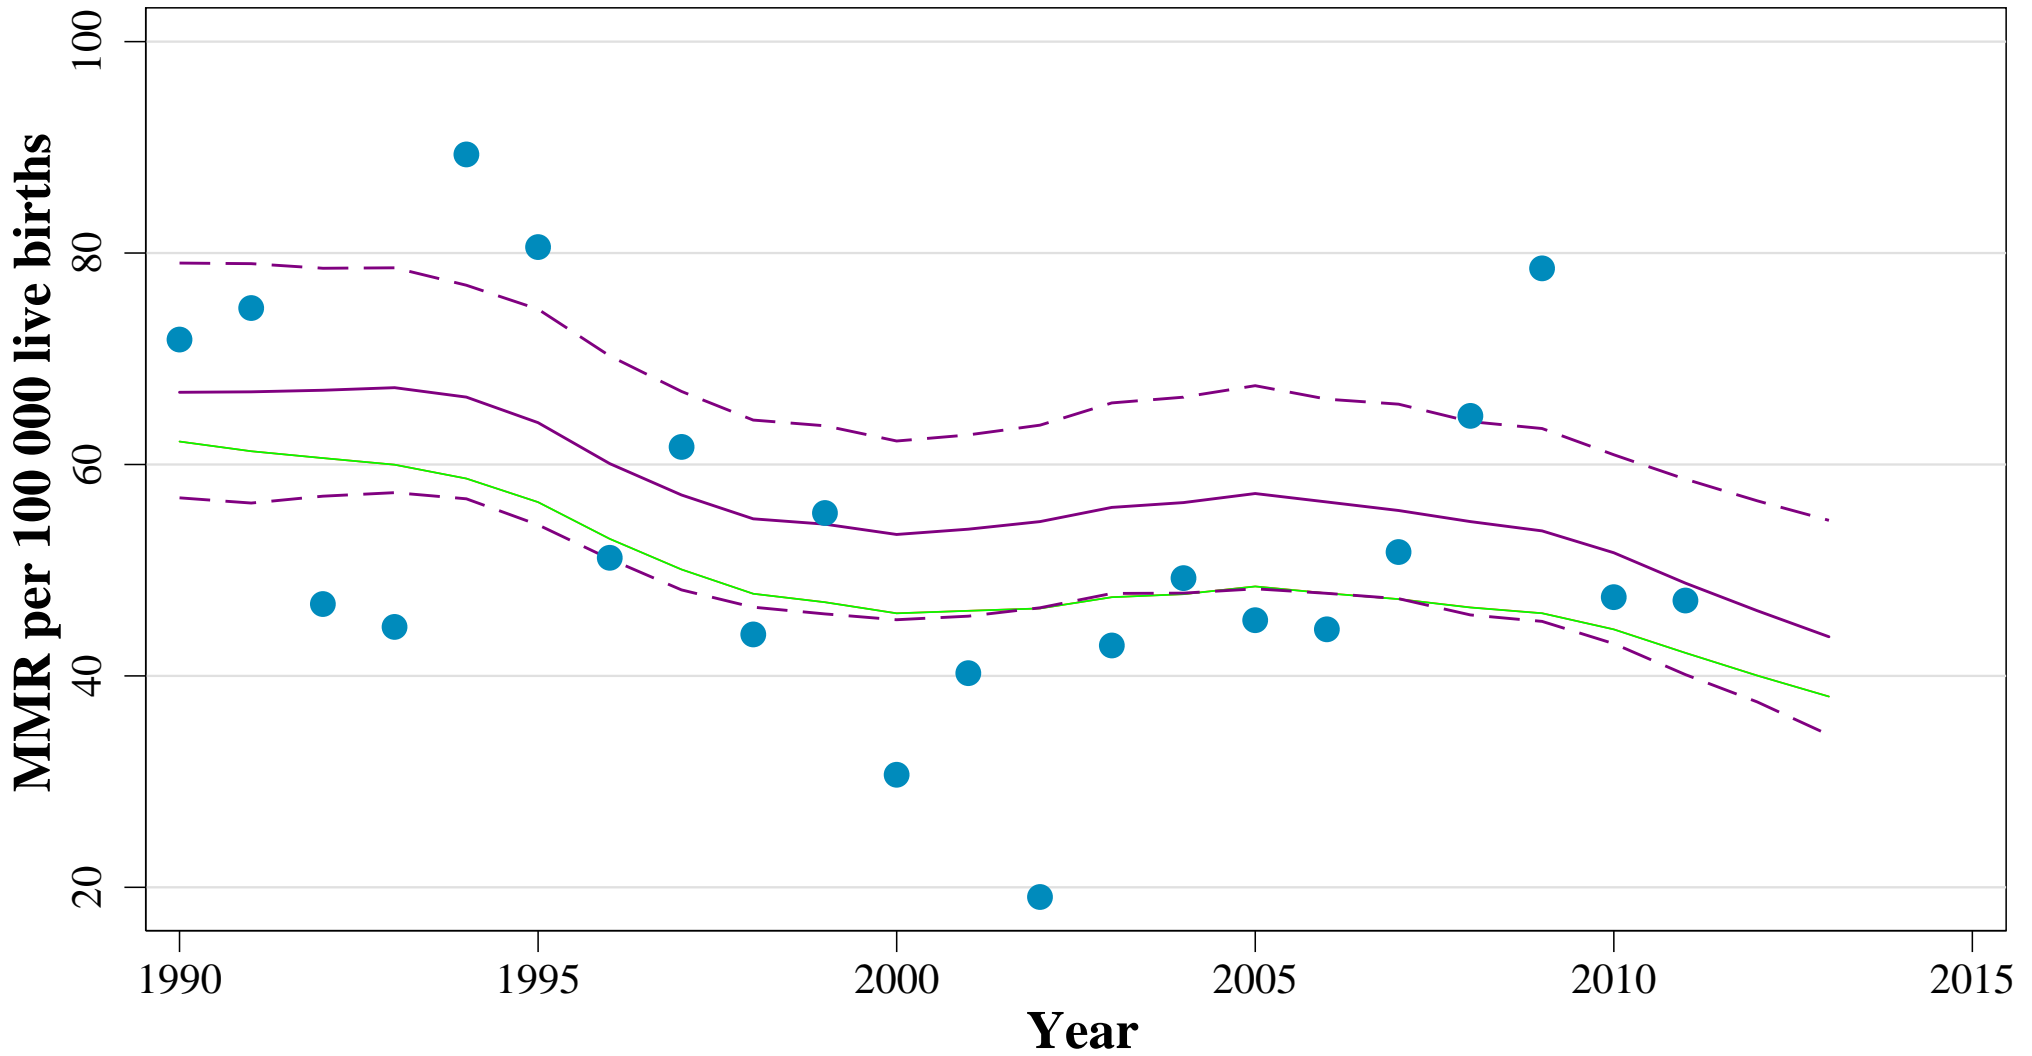

# Mexico

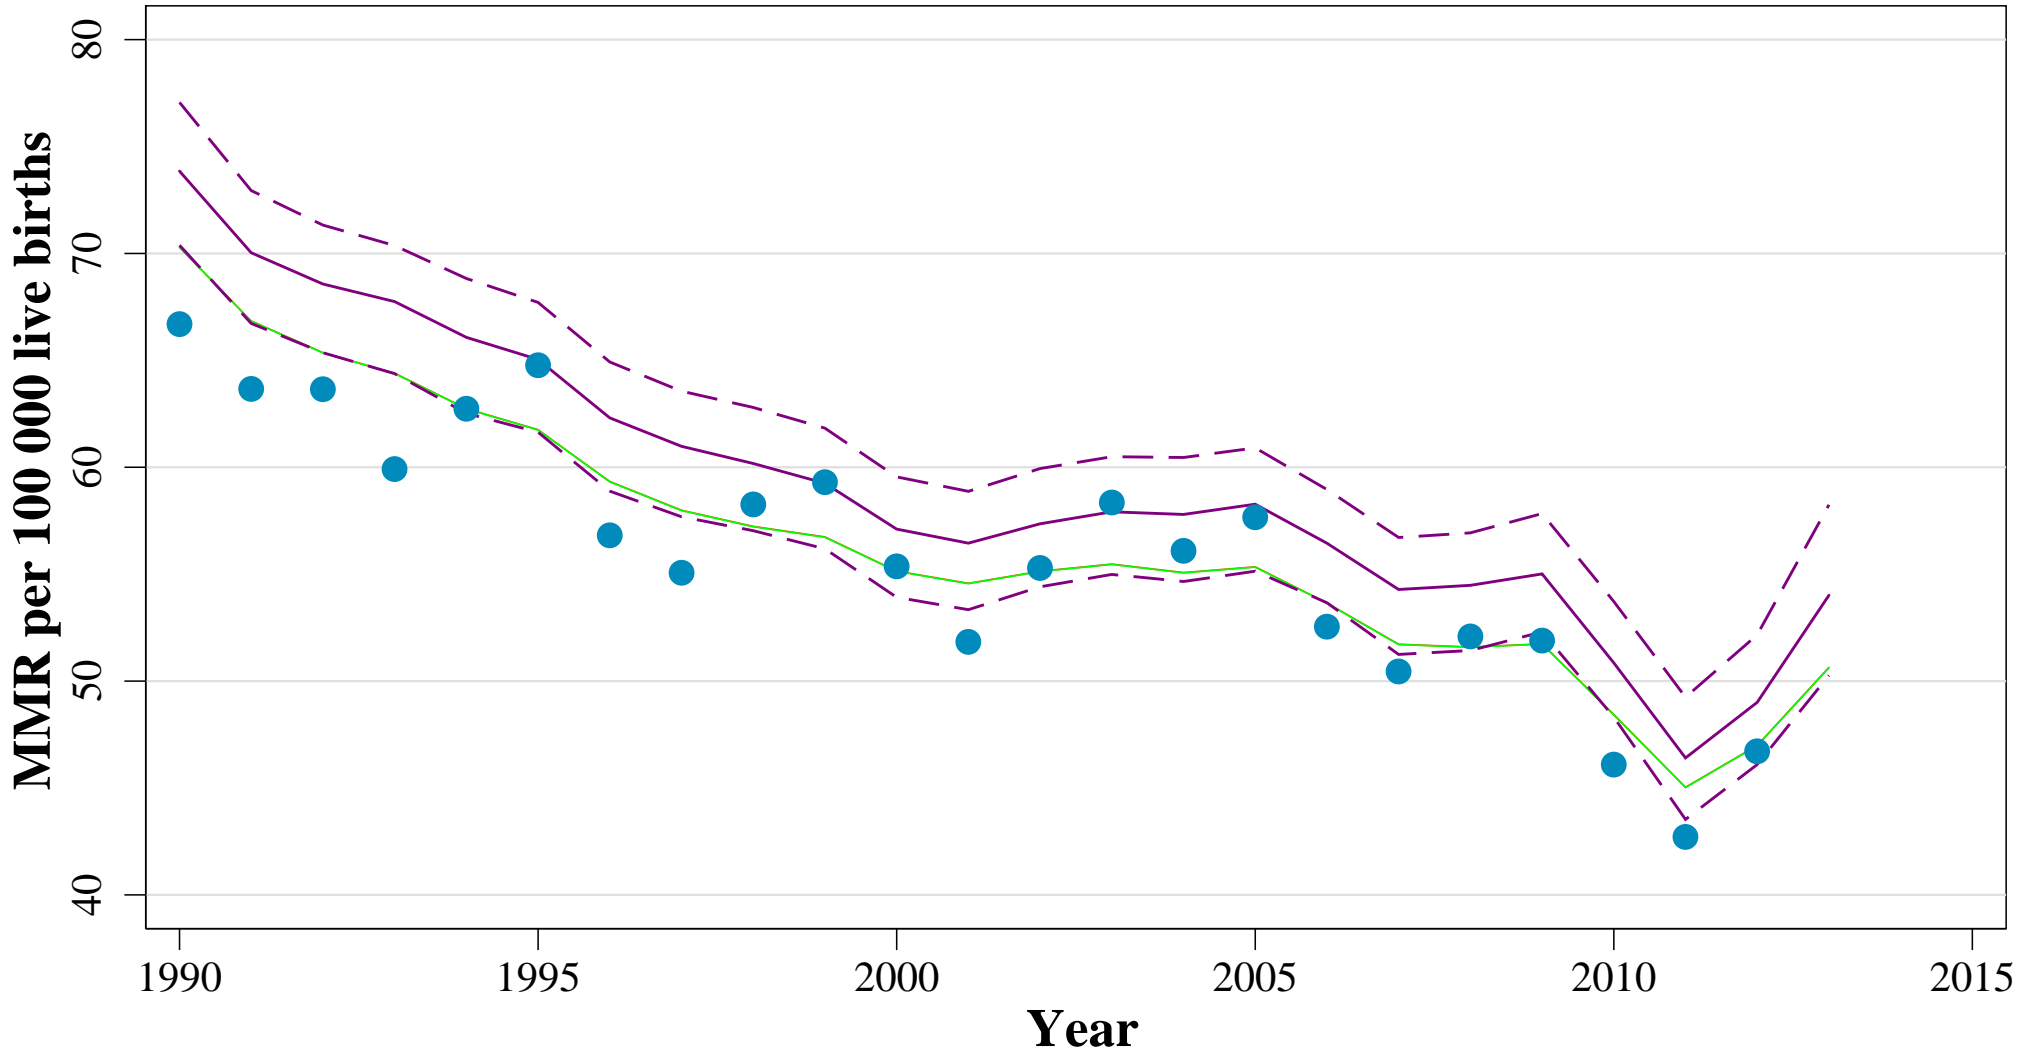

# Moldova

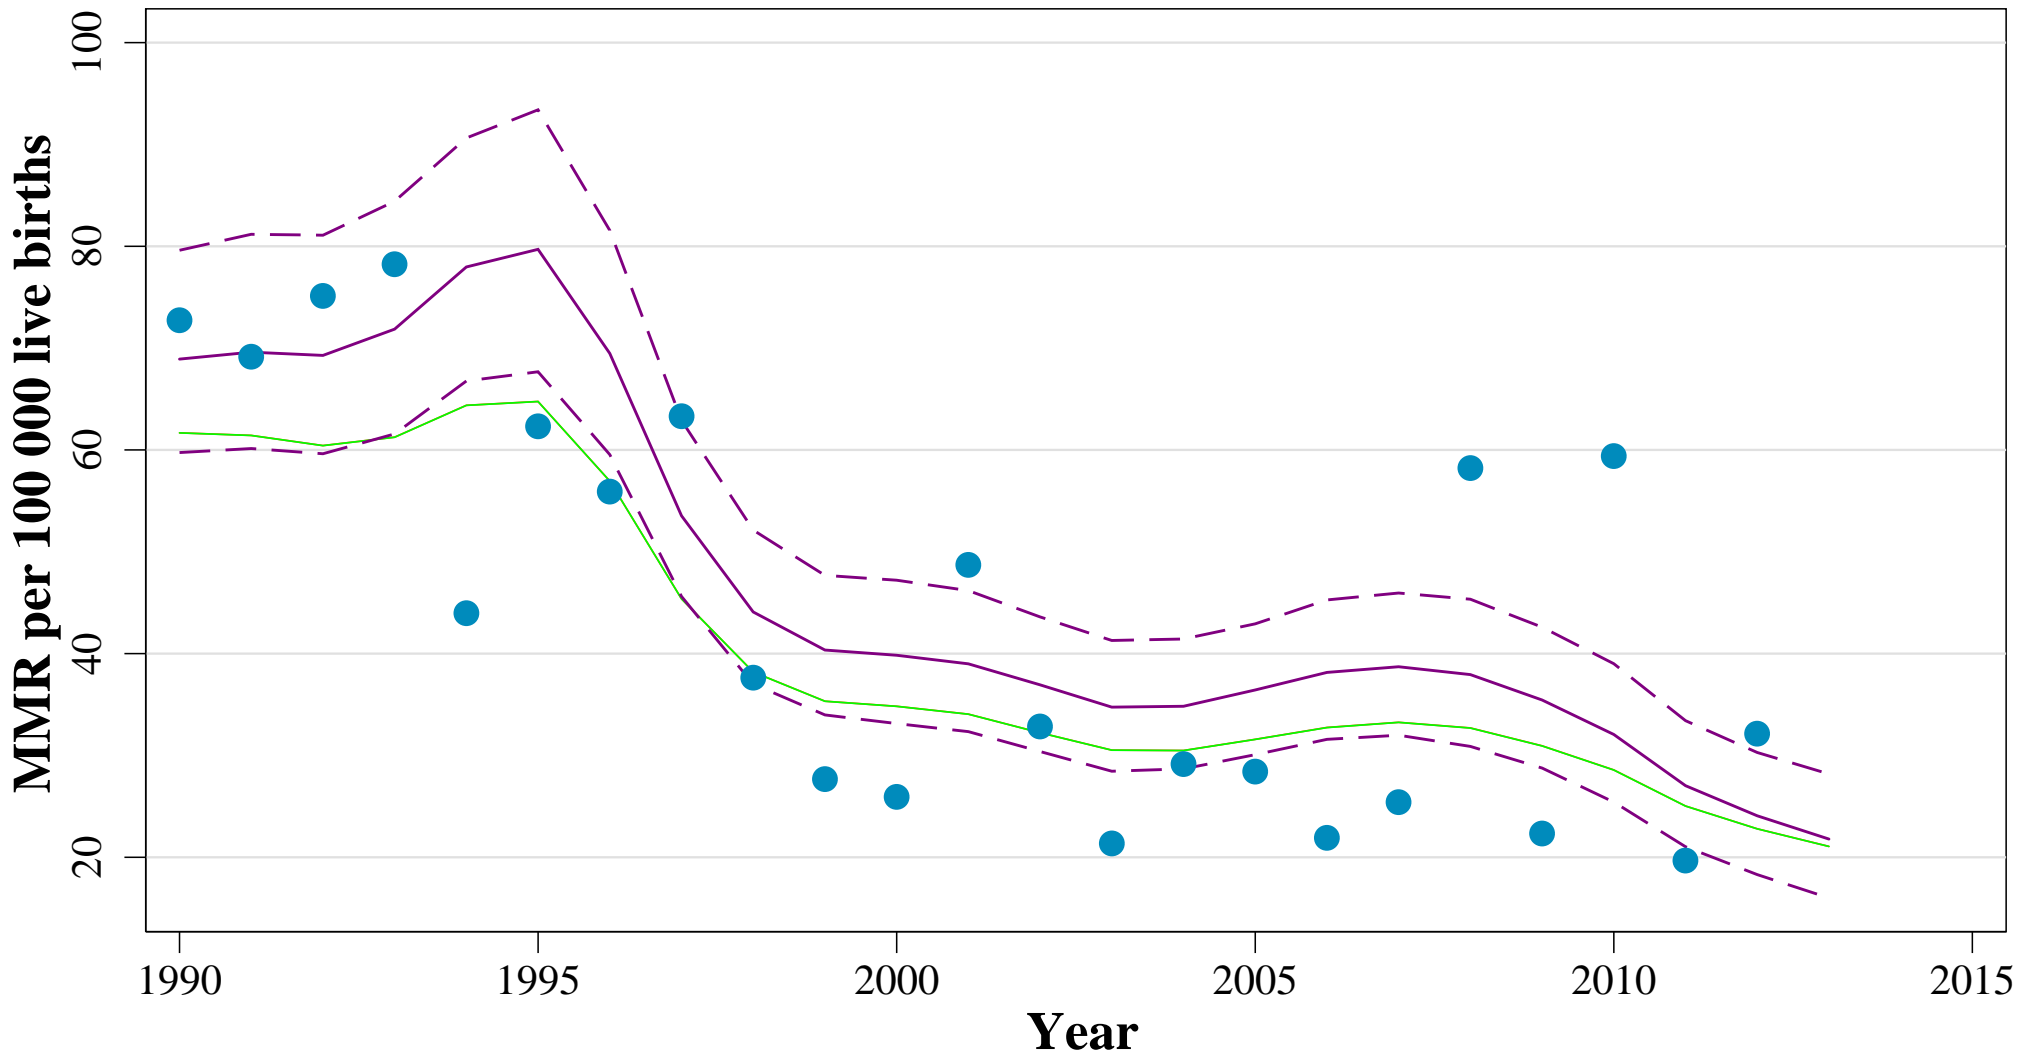

# Mongolia

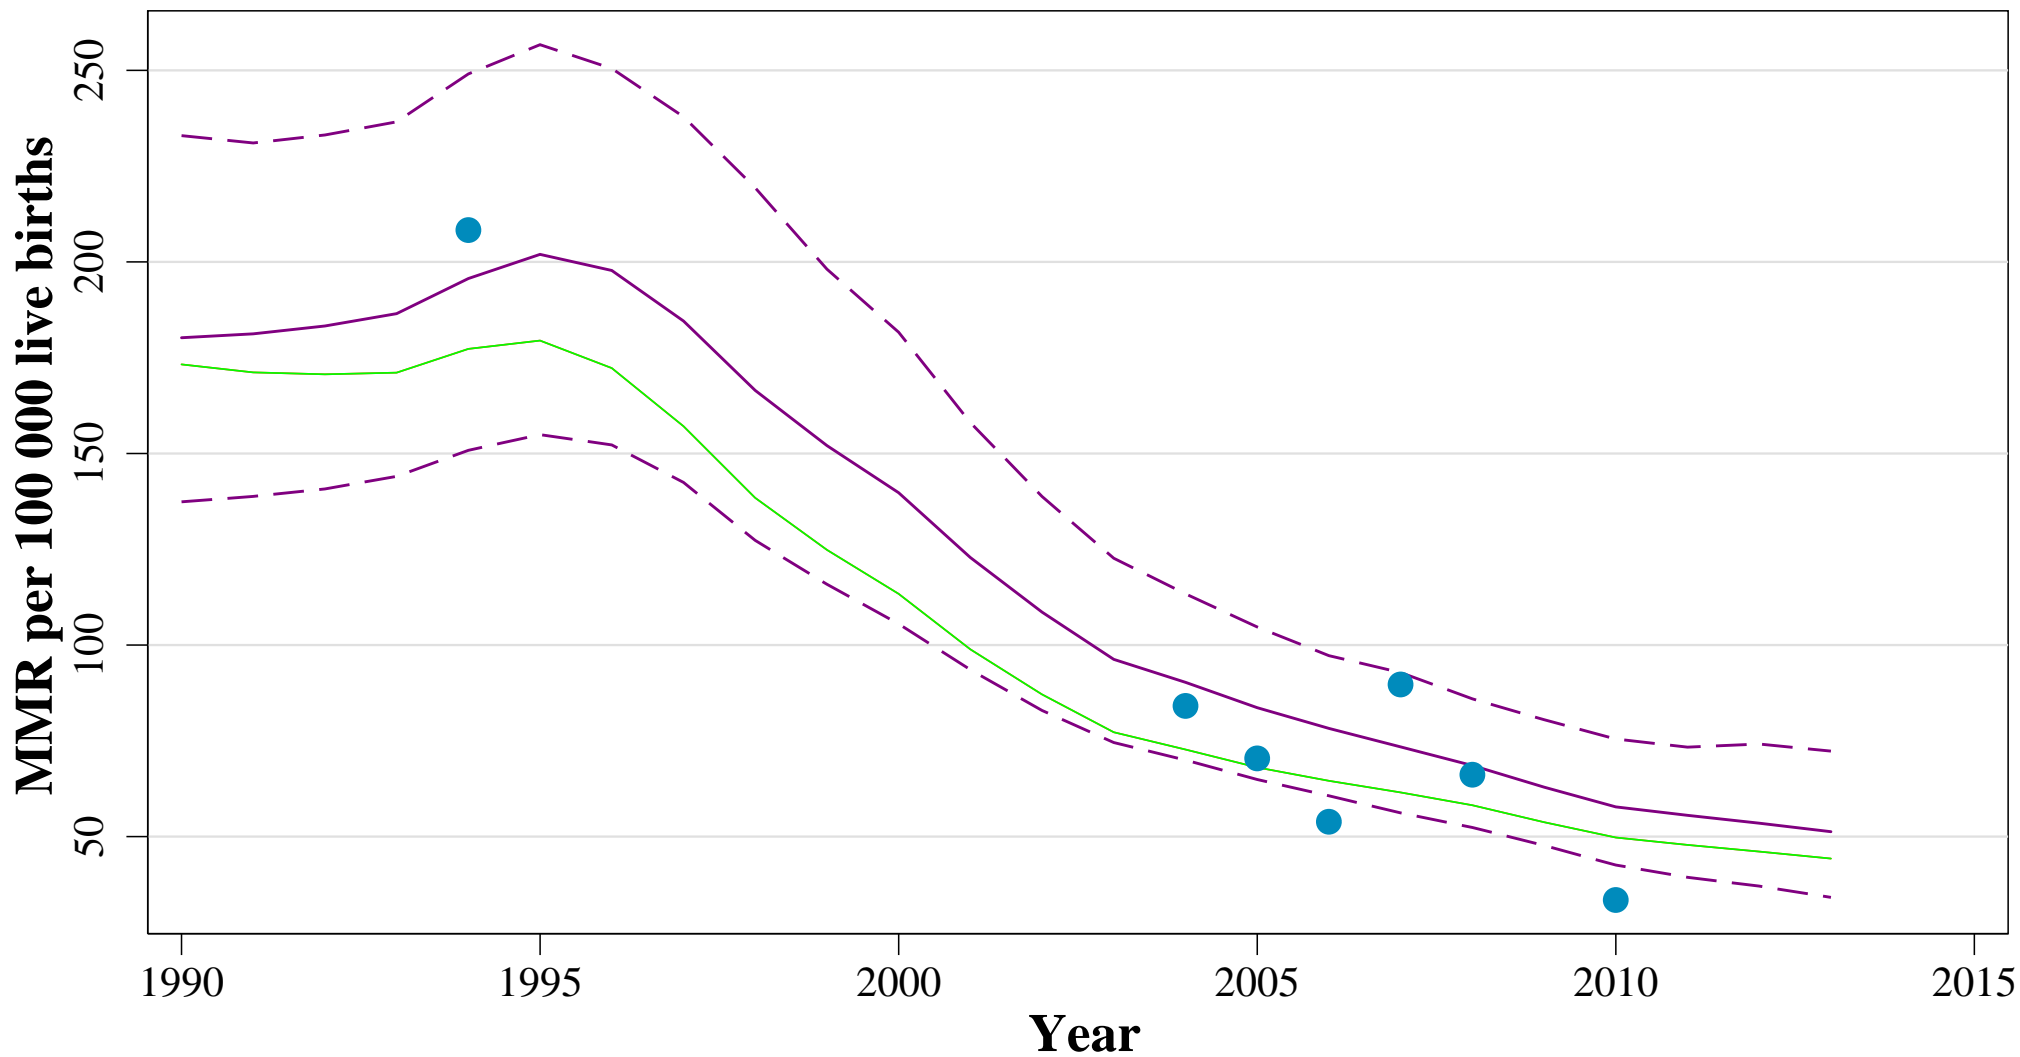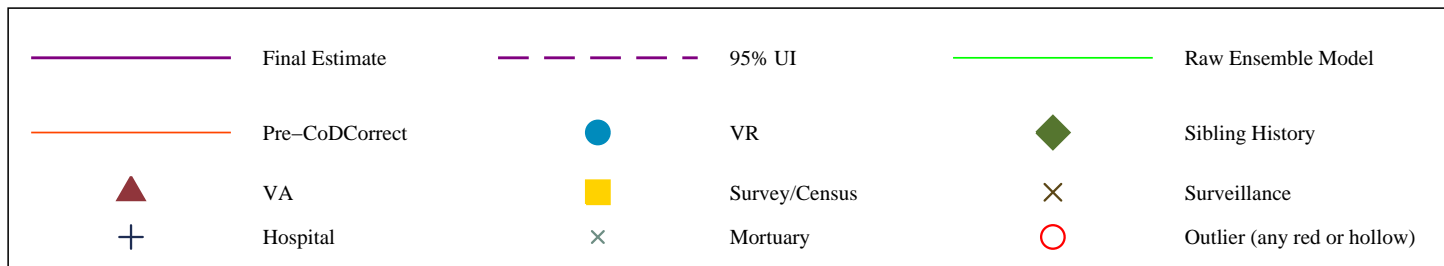

# Montenegro

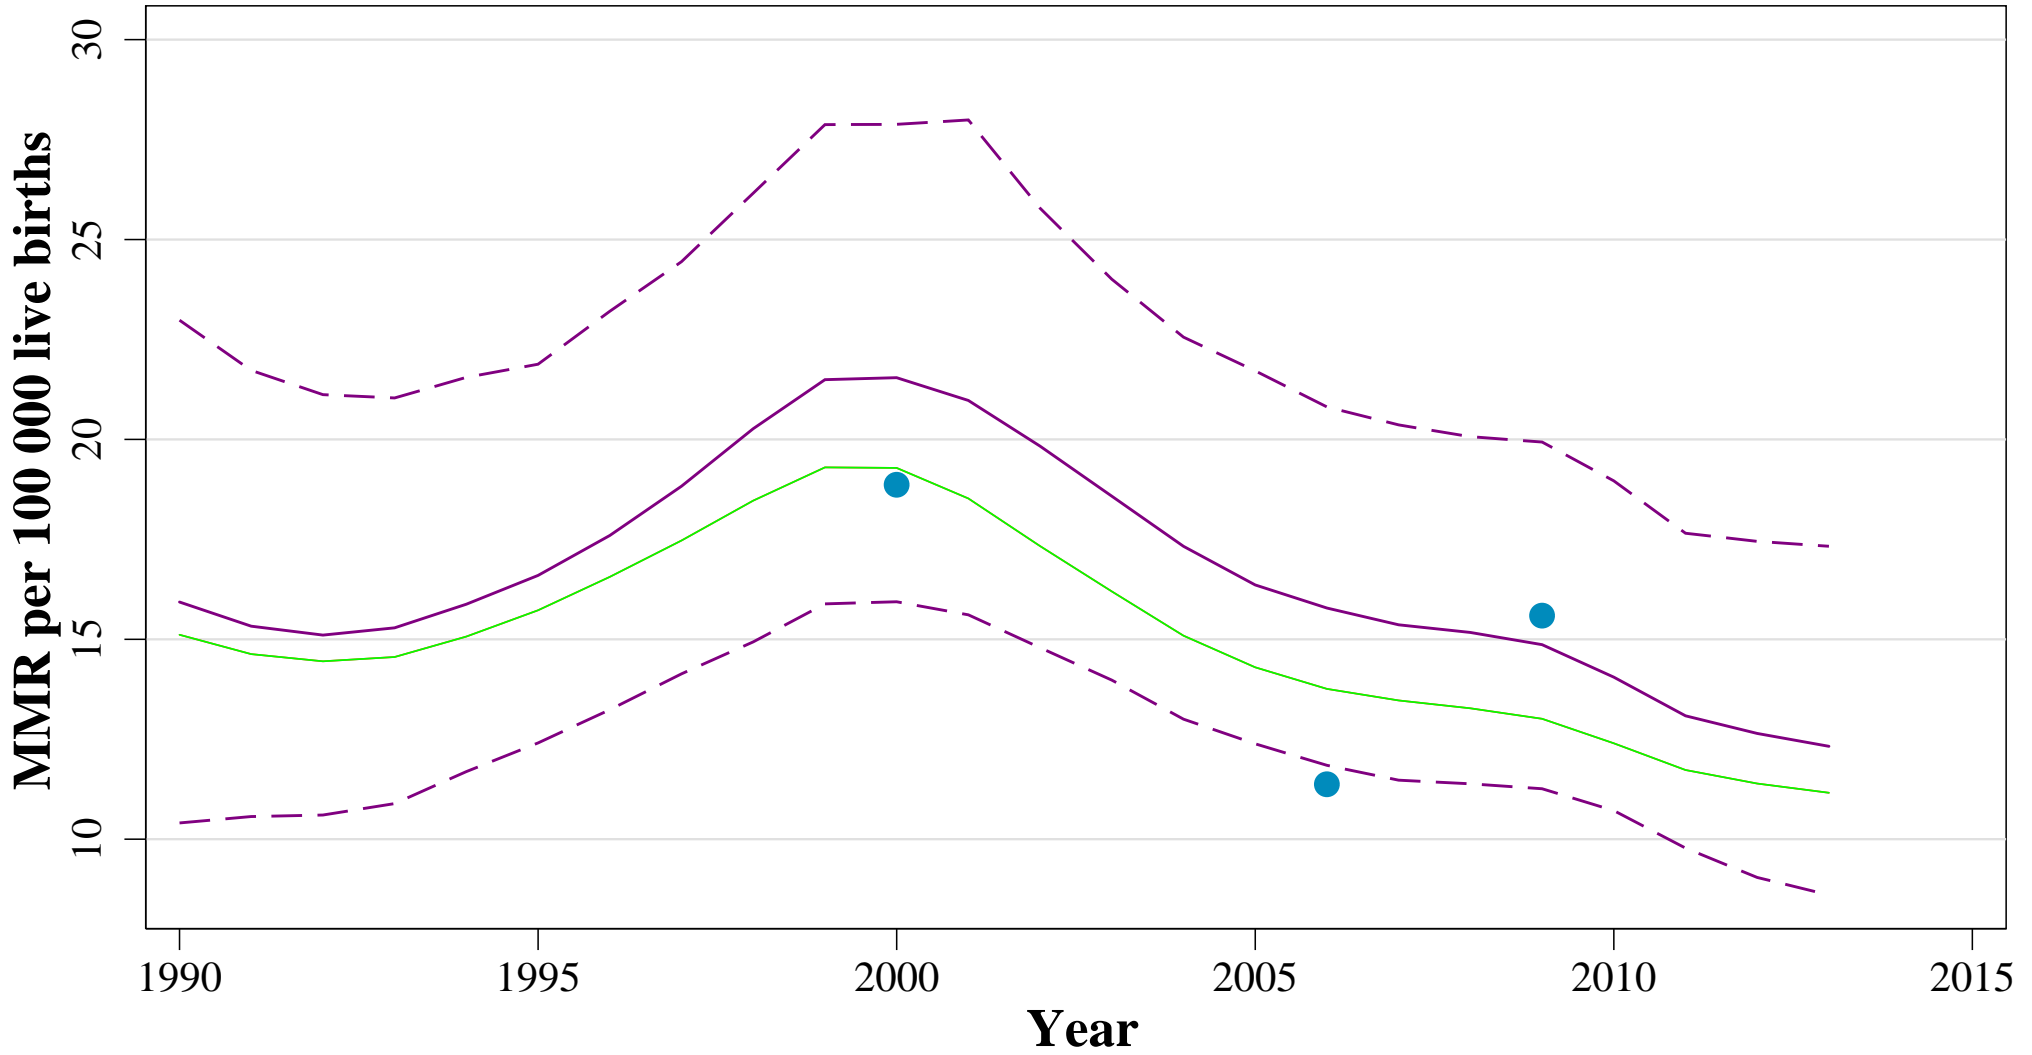

# Morocco

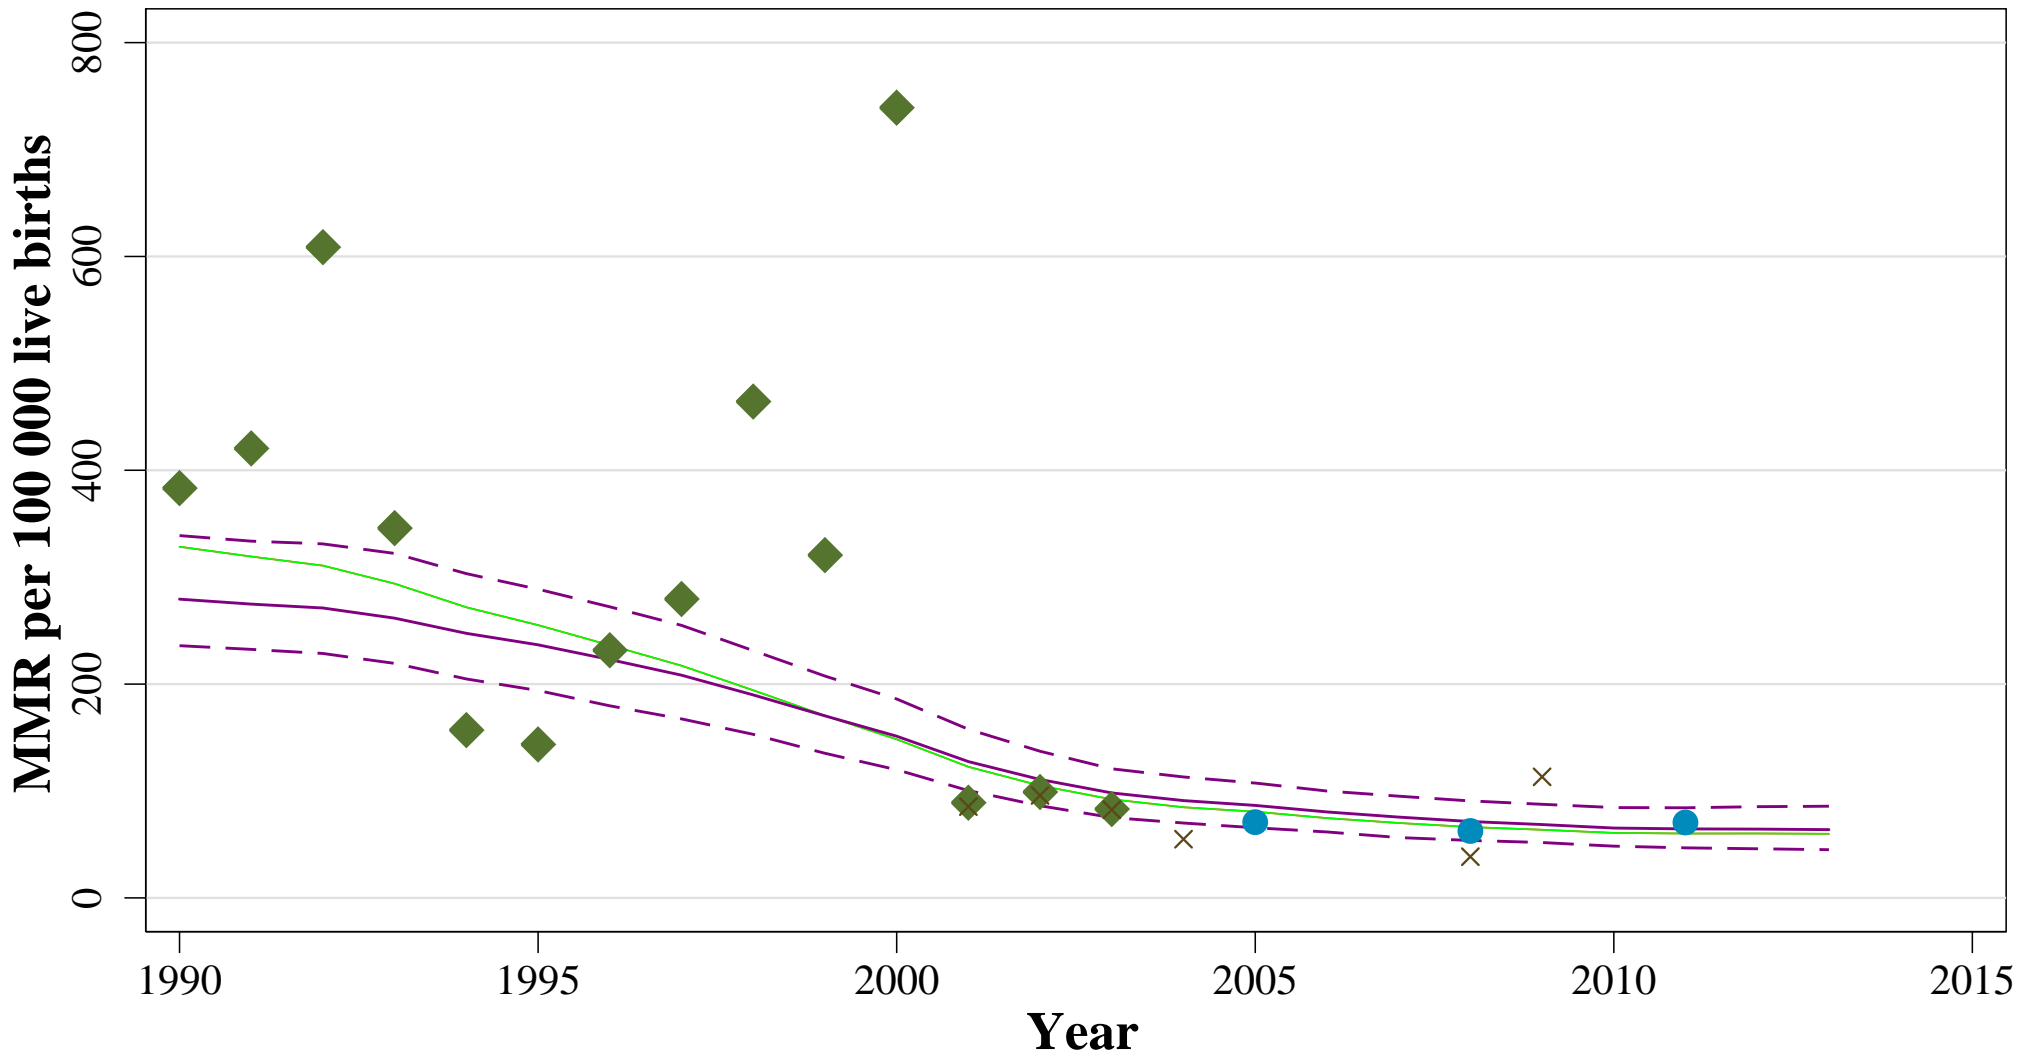



# Mozambique

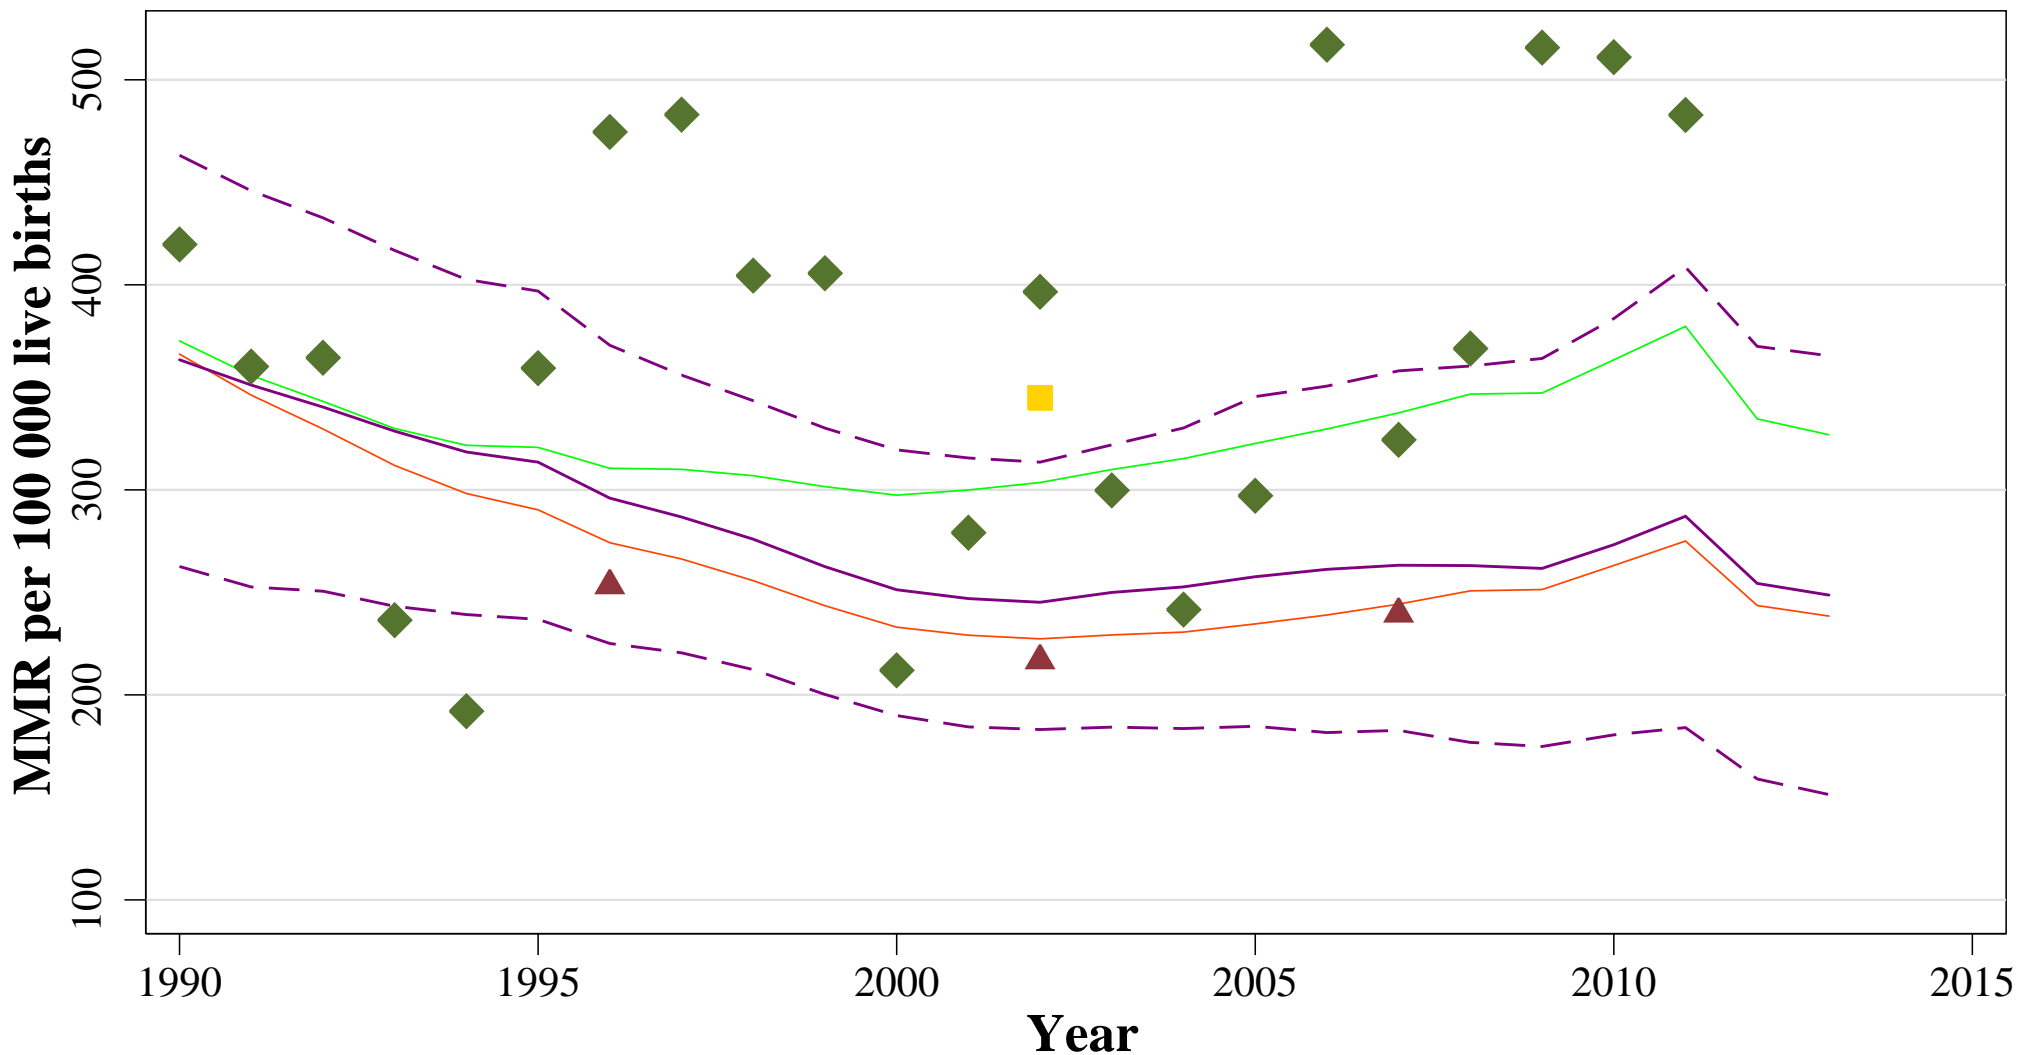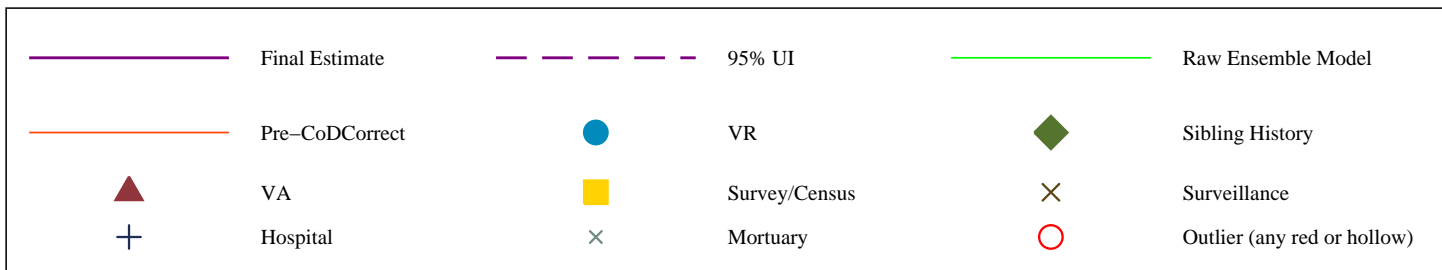

# Myanmar

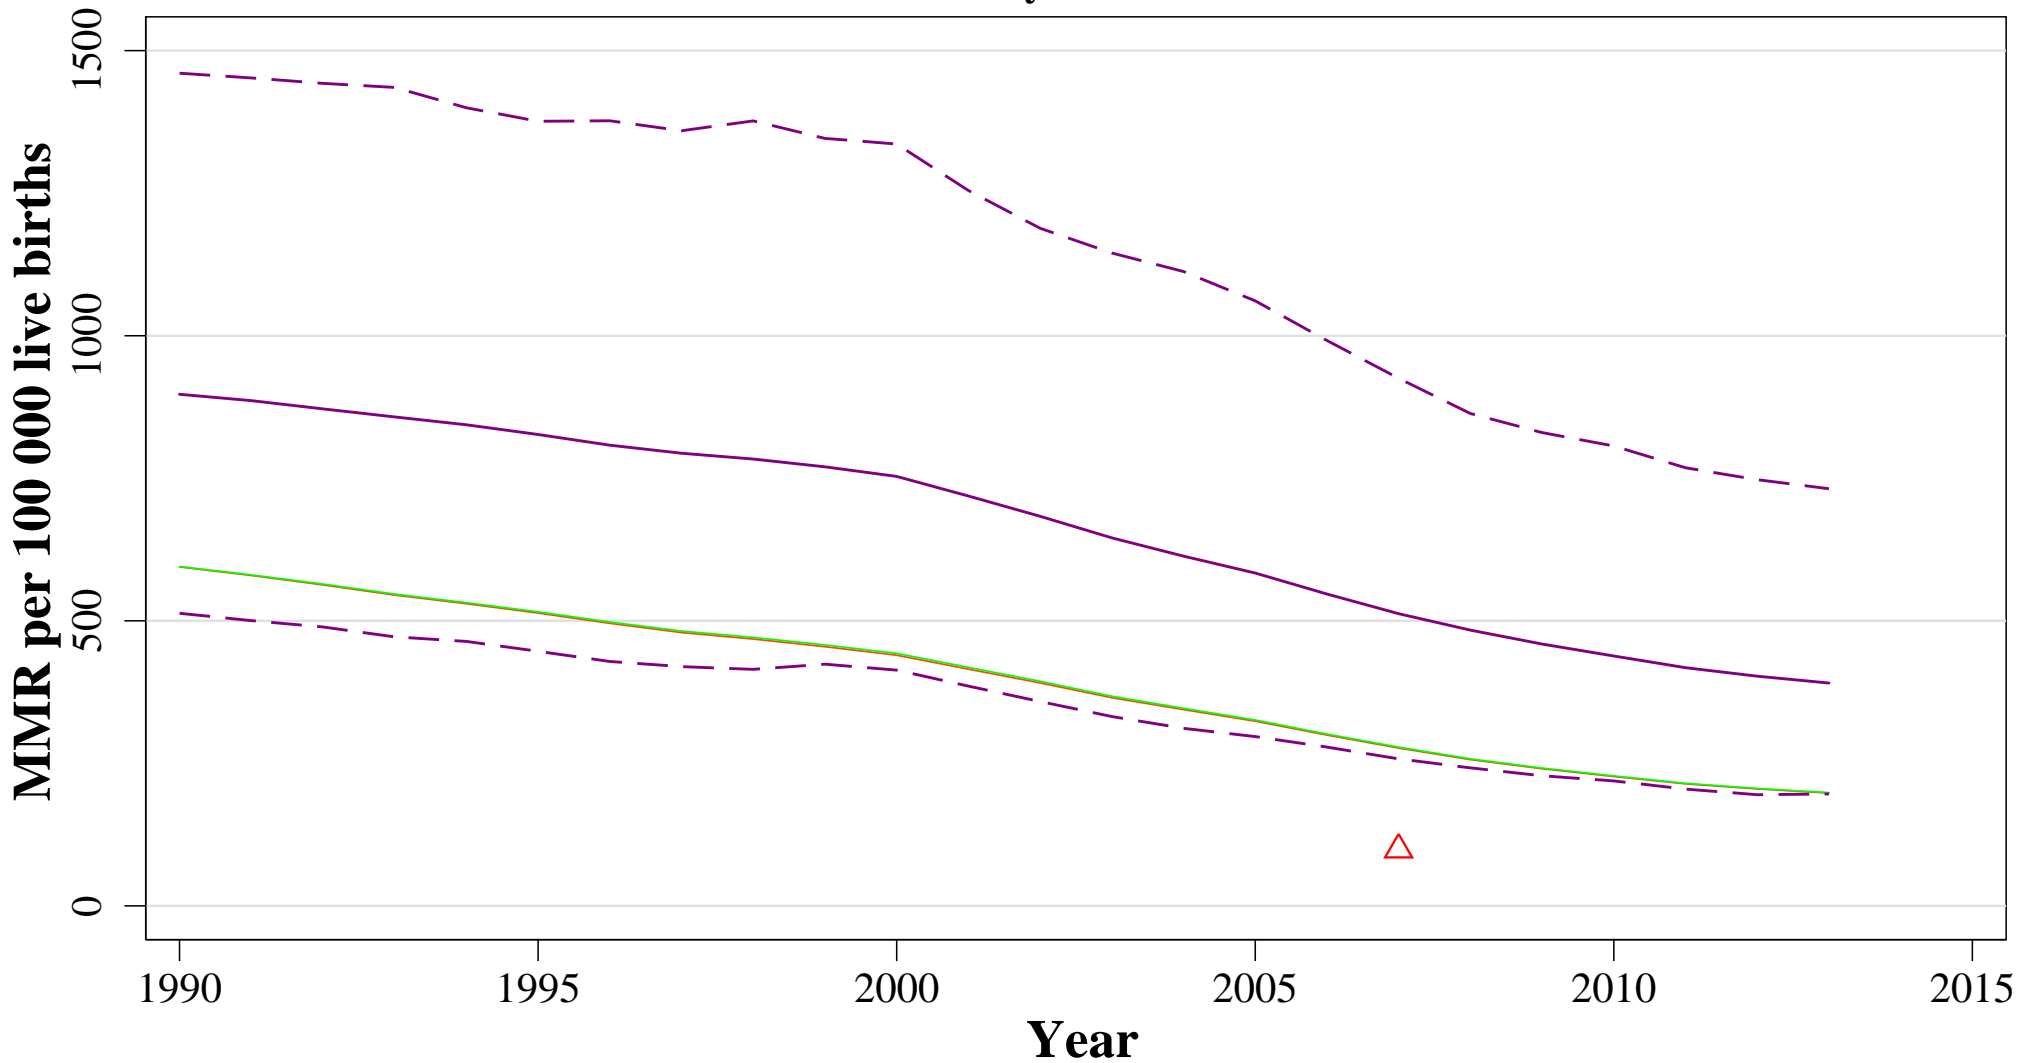

# Namibia

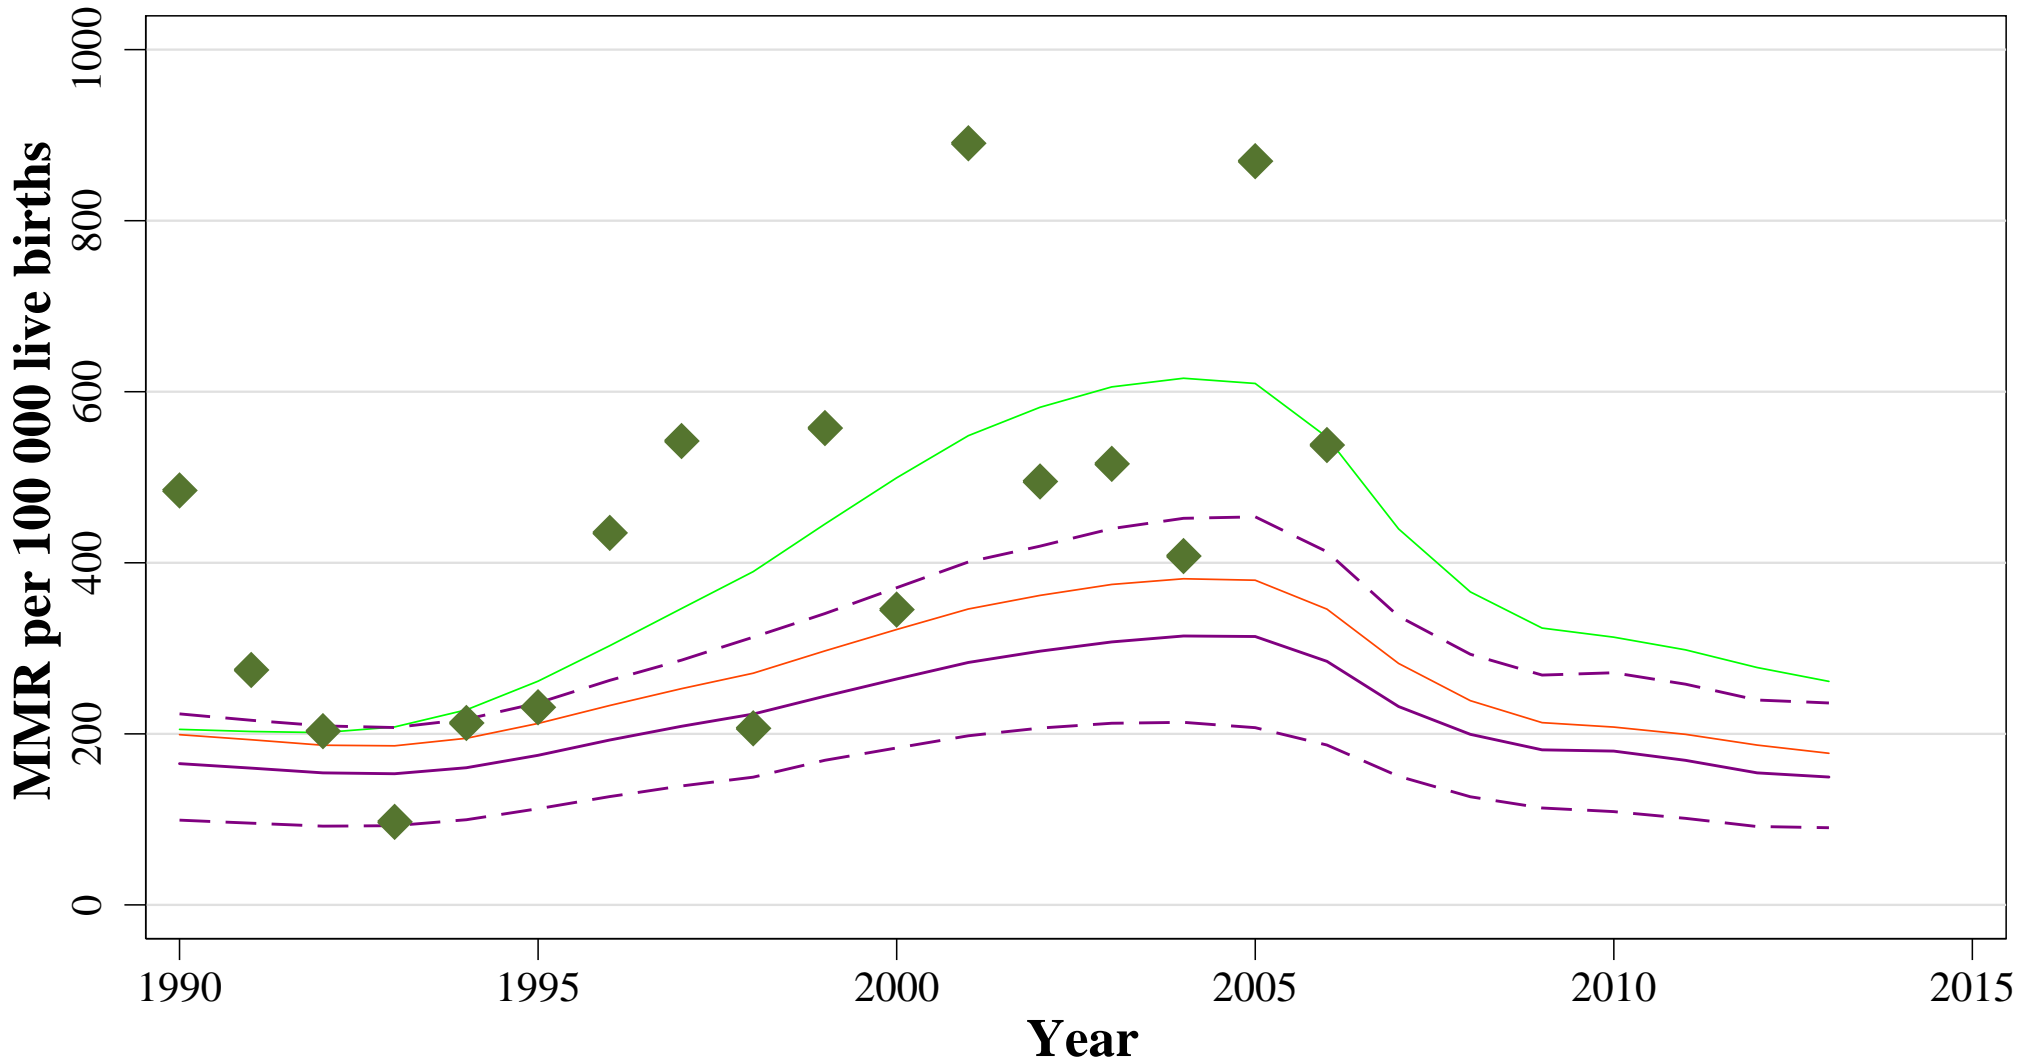

# Nepal

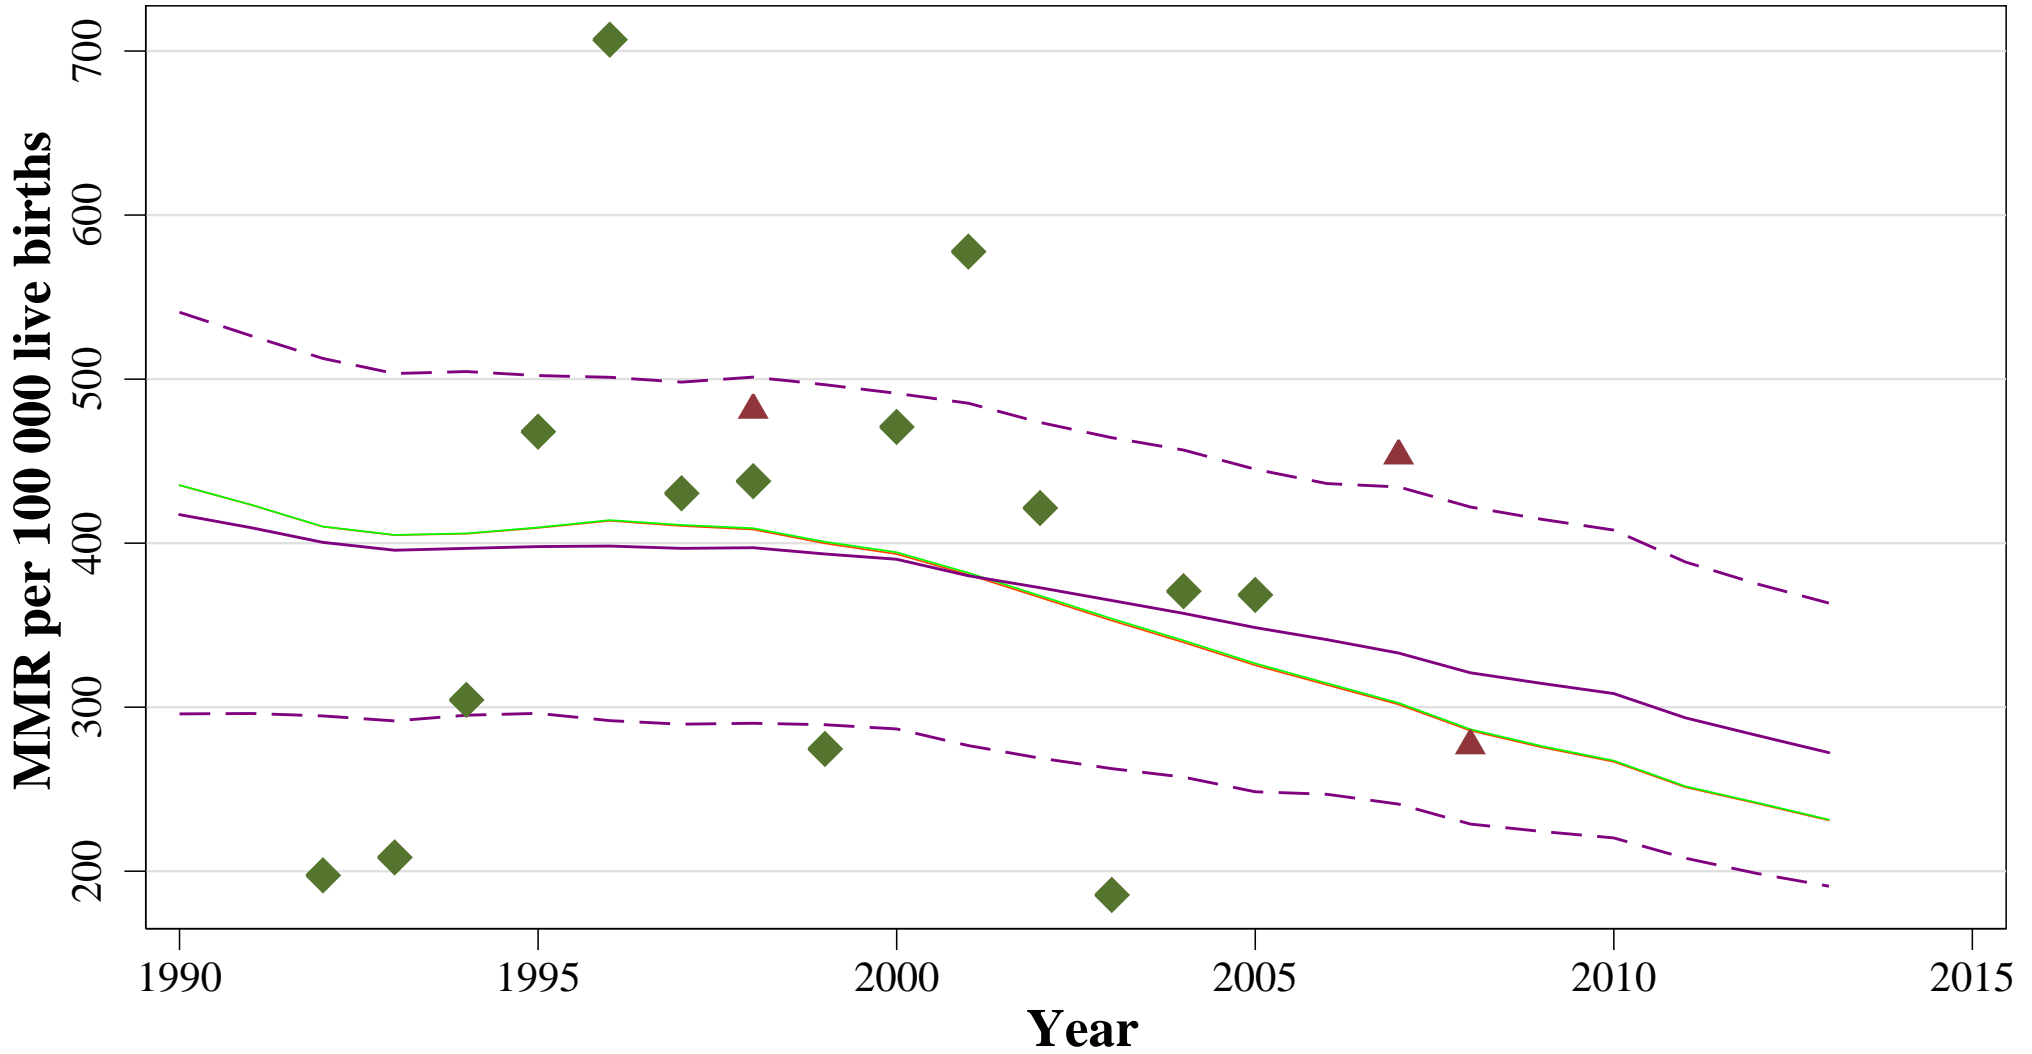

# Netherlands

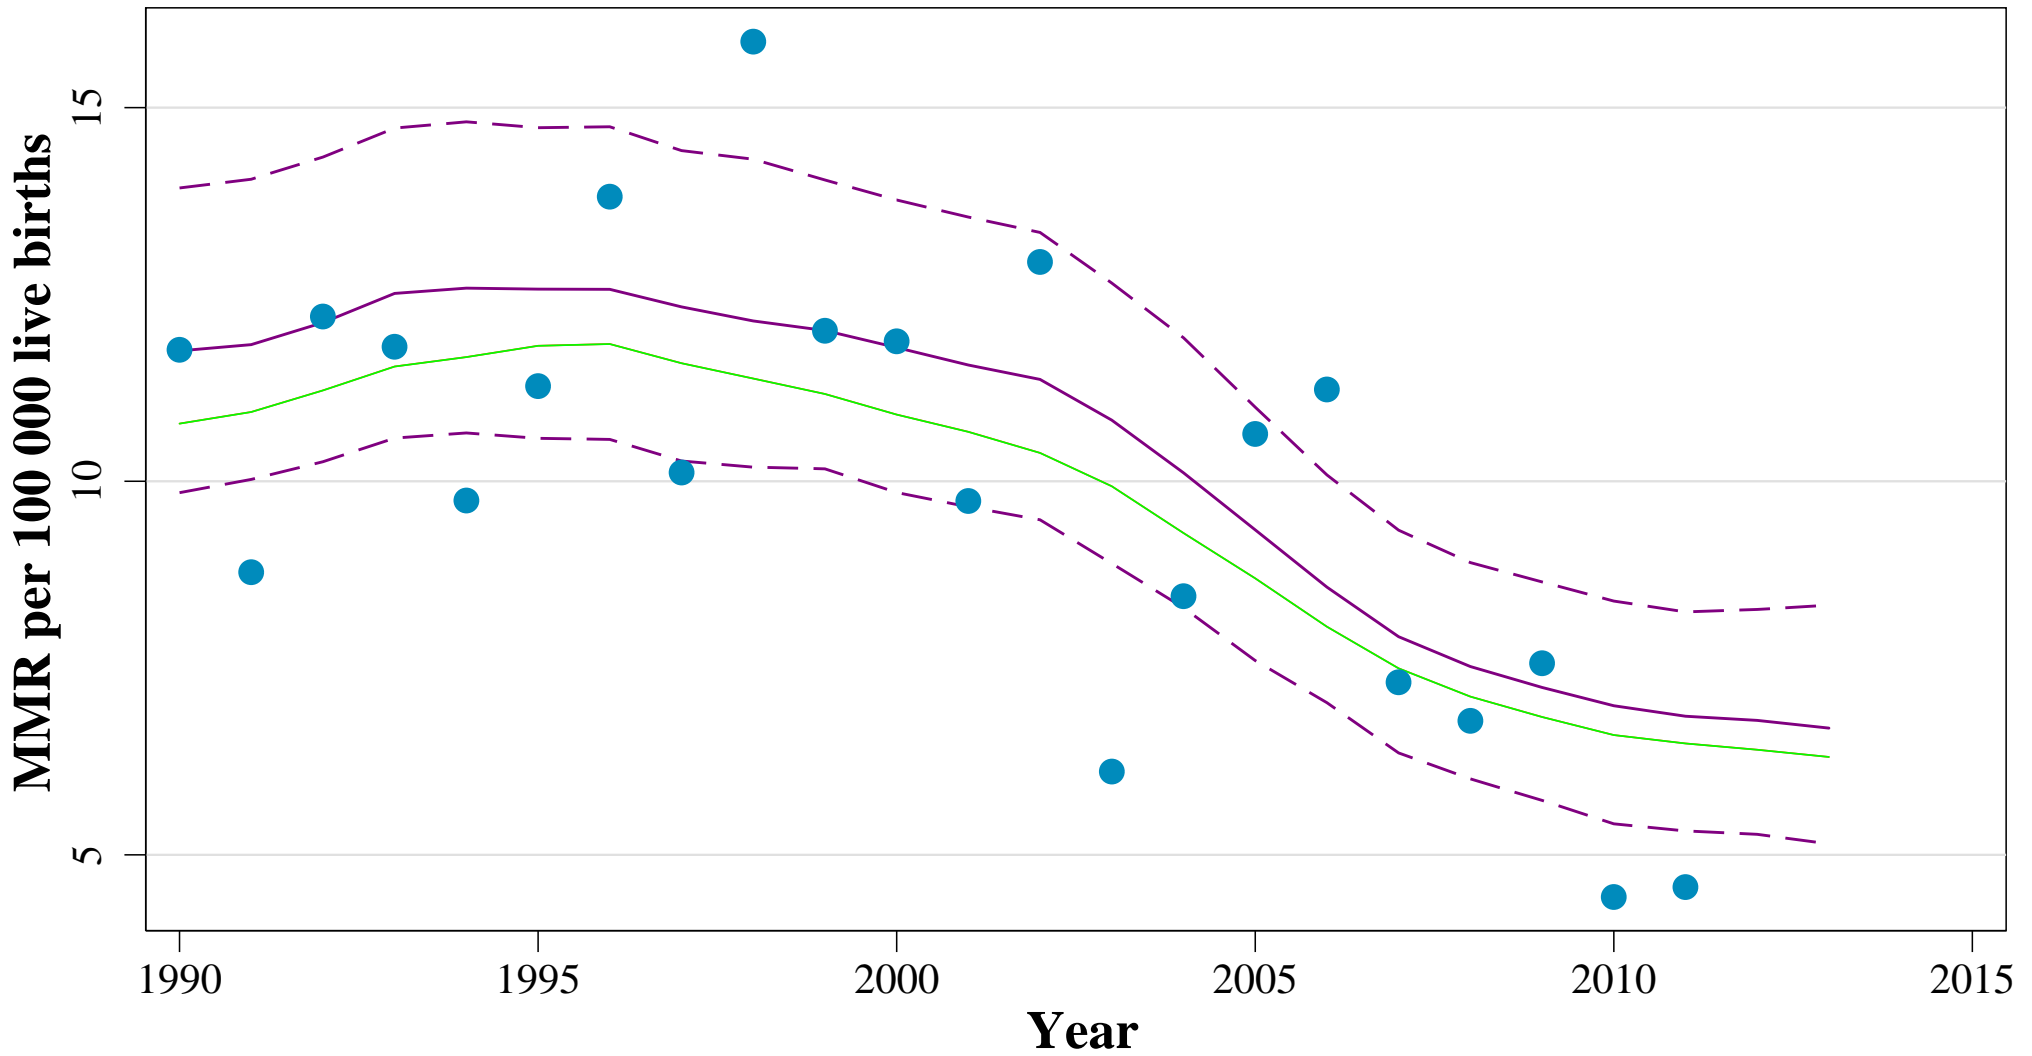

# New Zealand

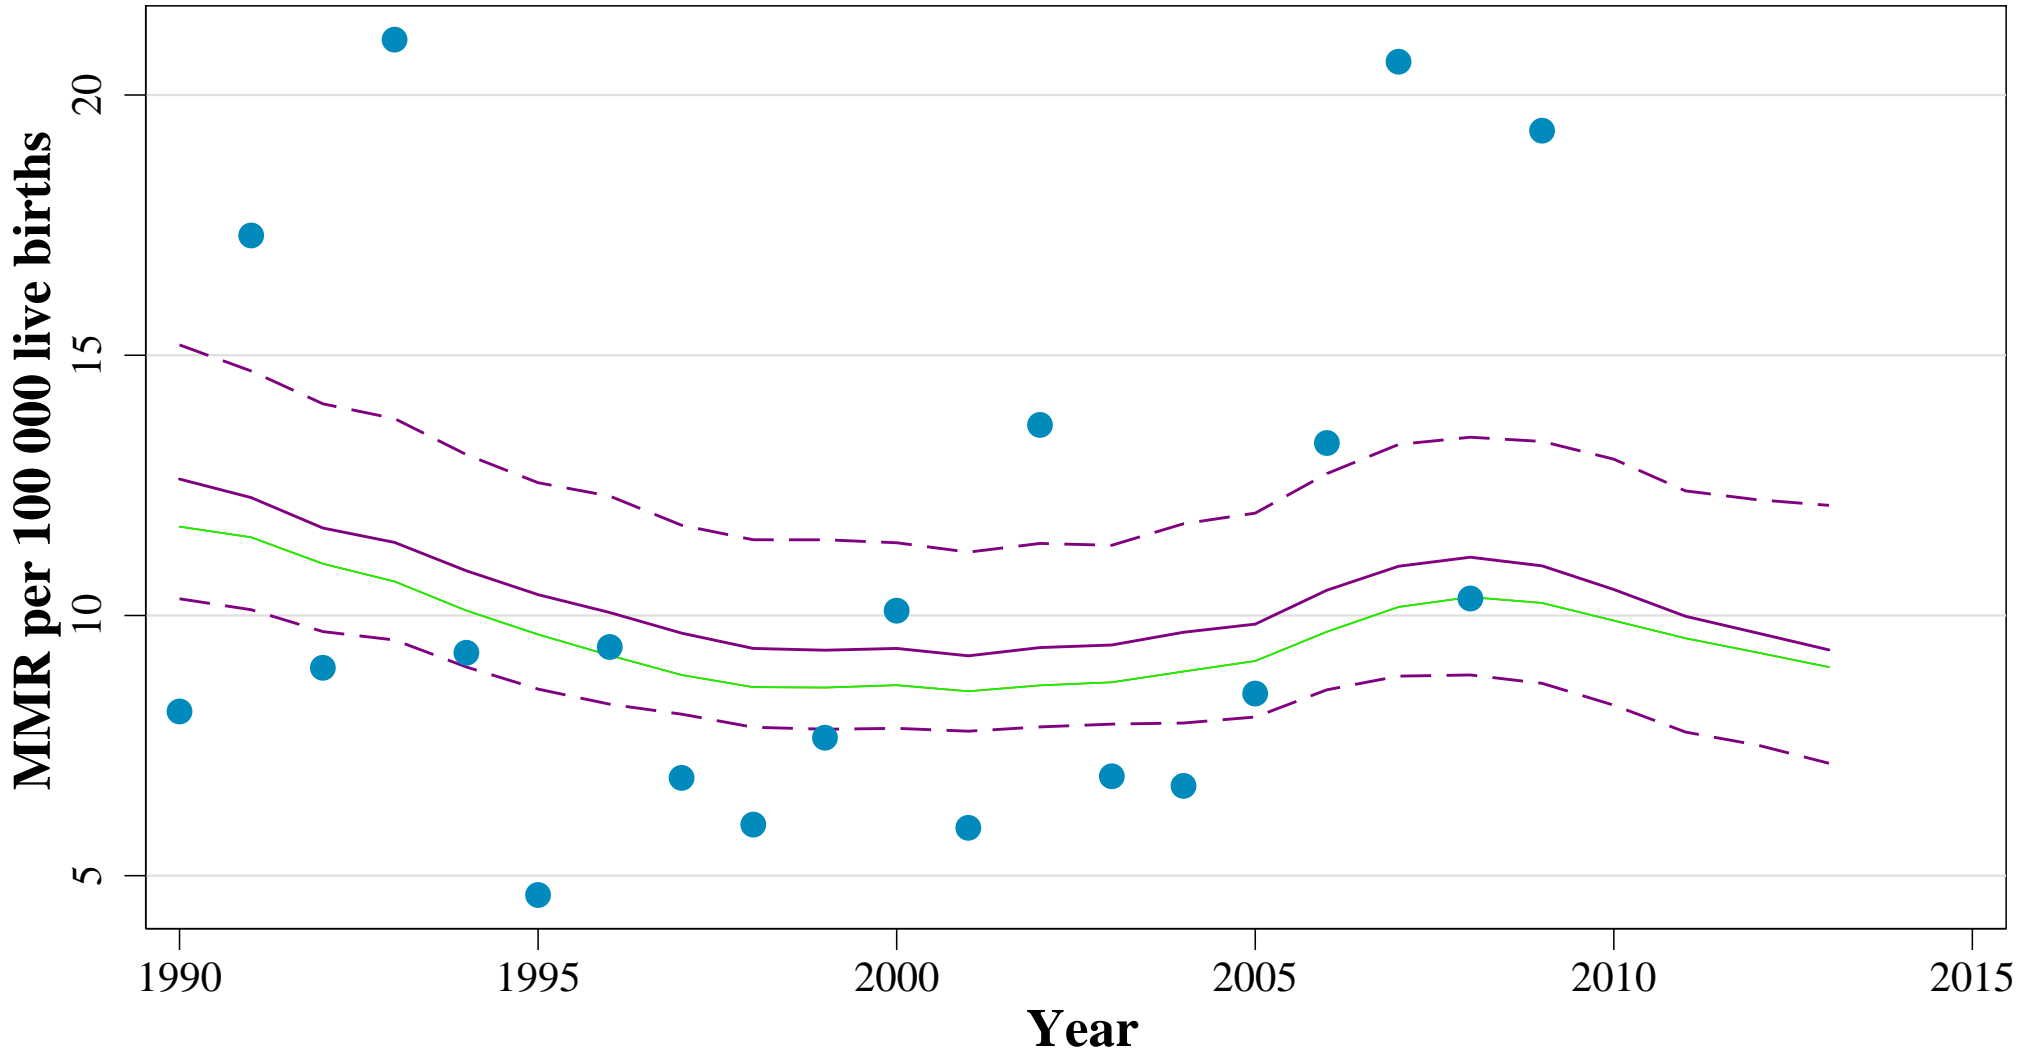

# Nicaragua

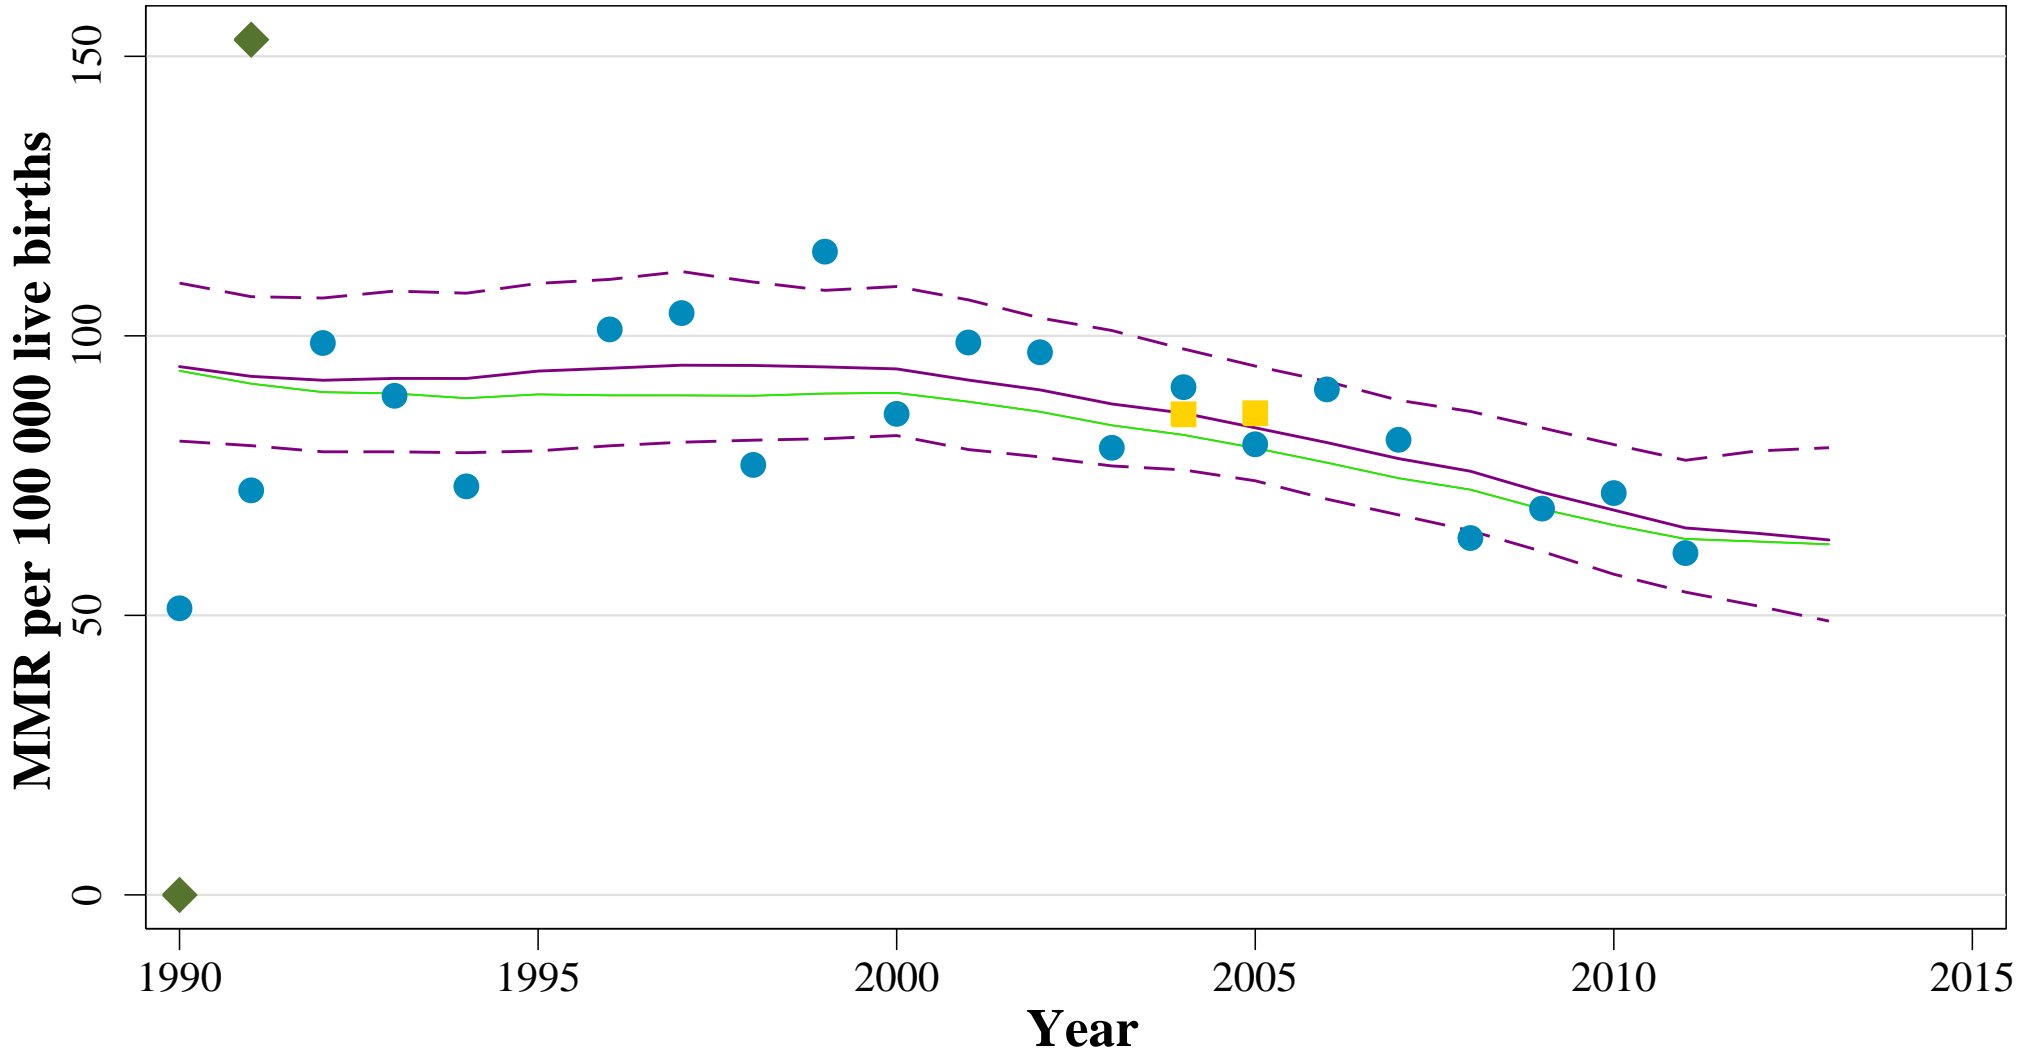

# Niger

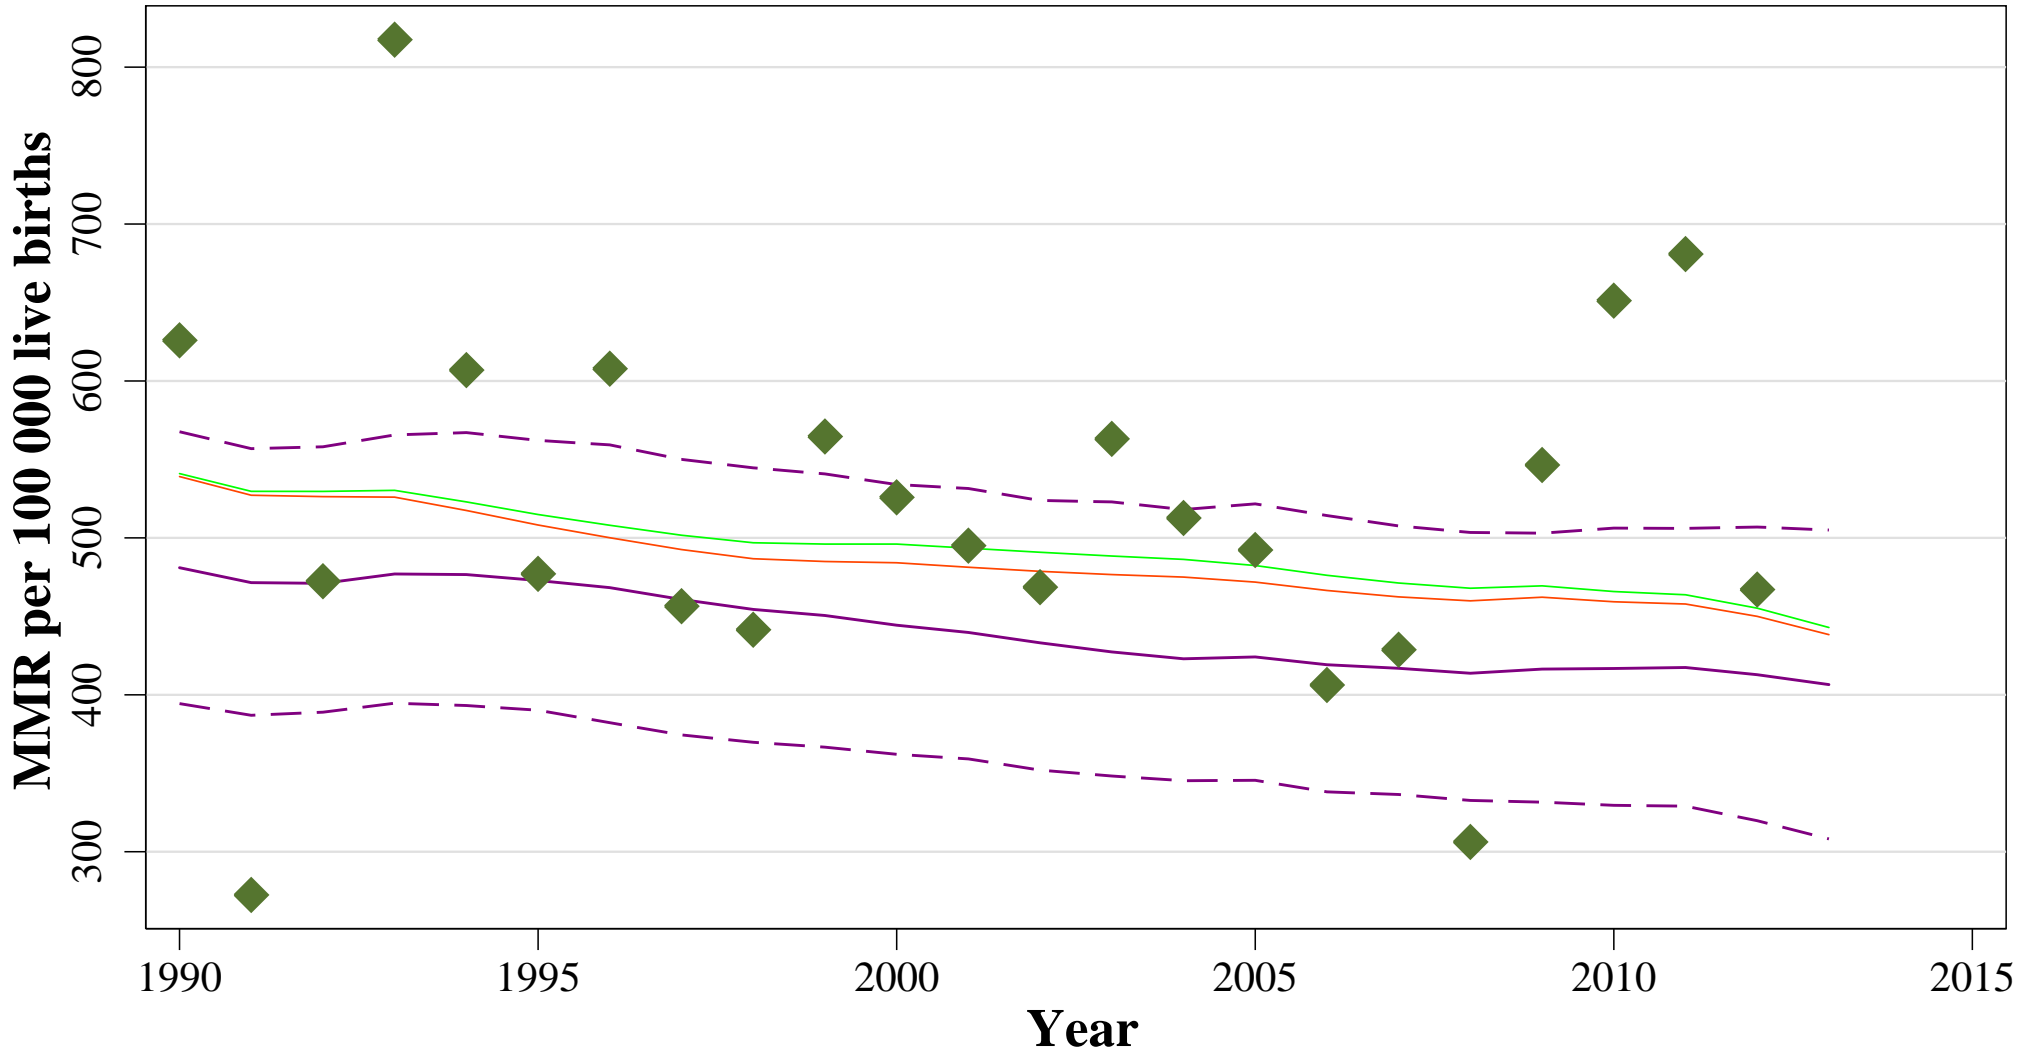



# Nigeria

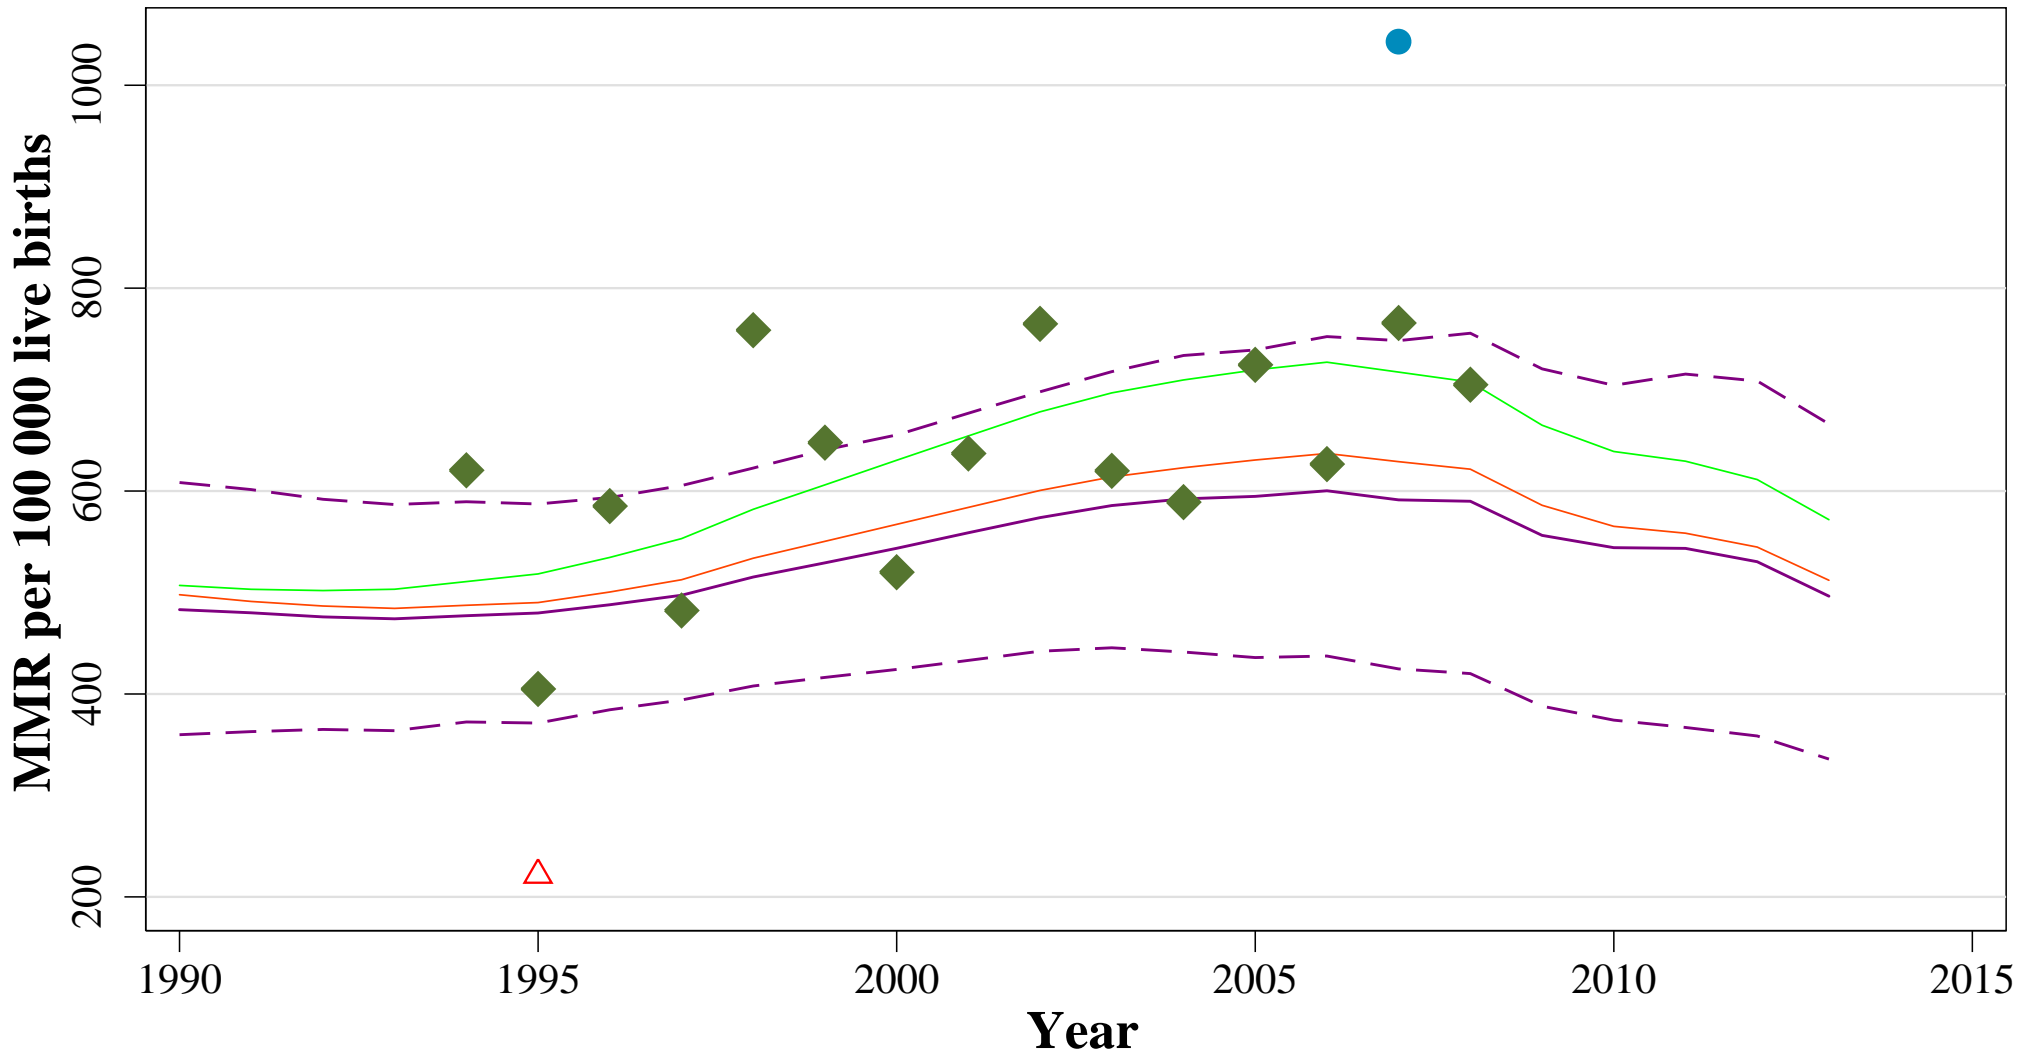

# North Korea

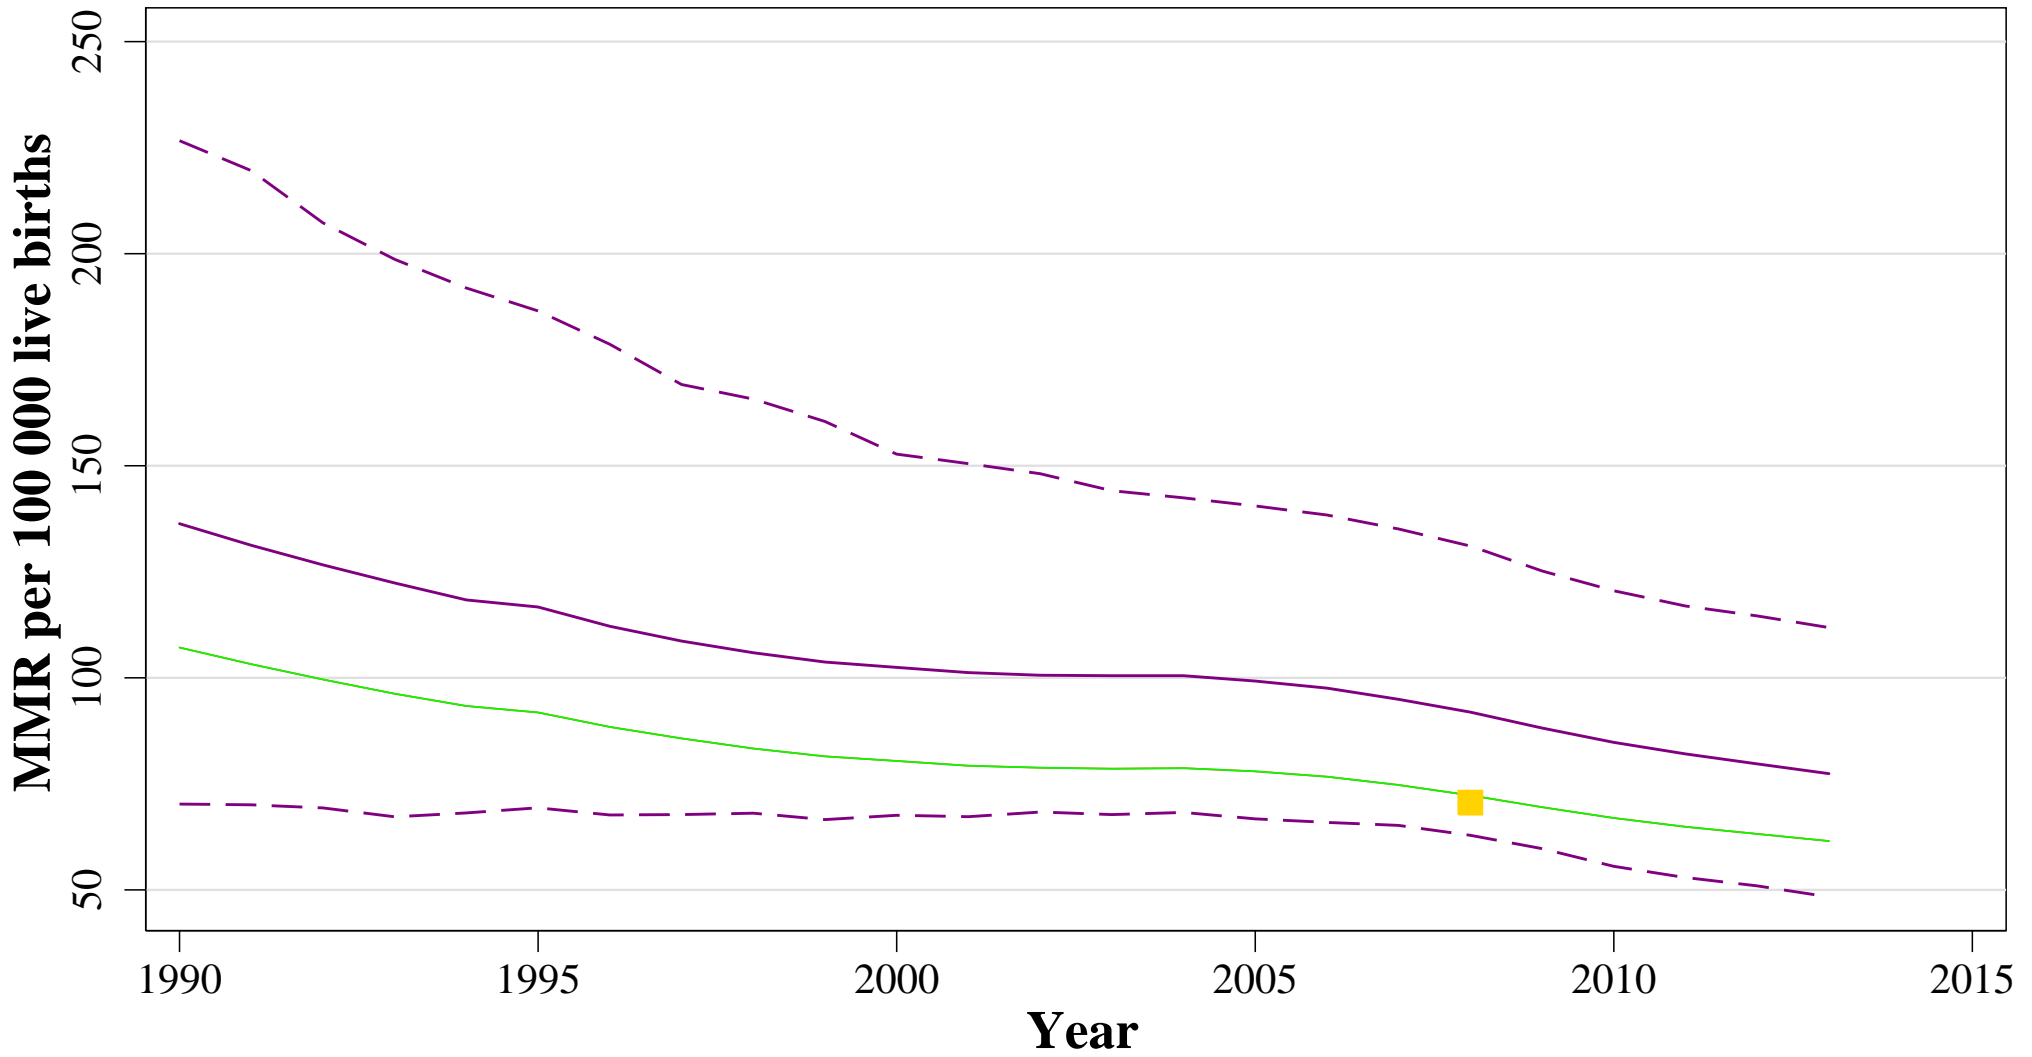

# Norway

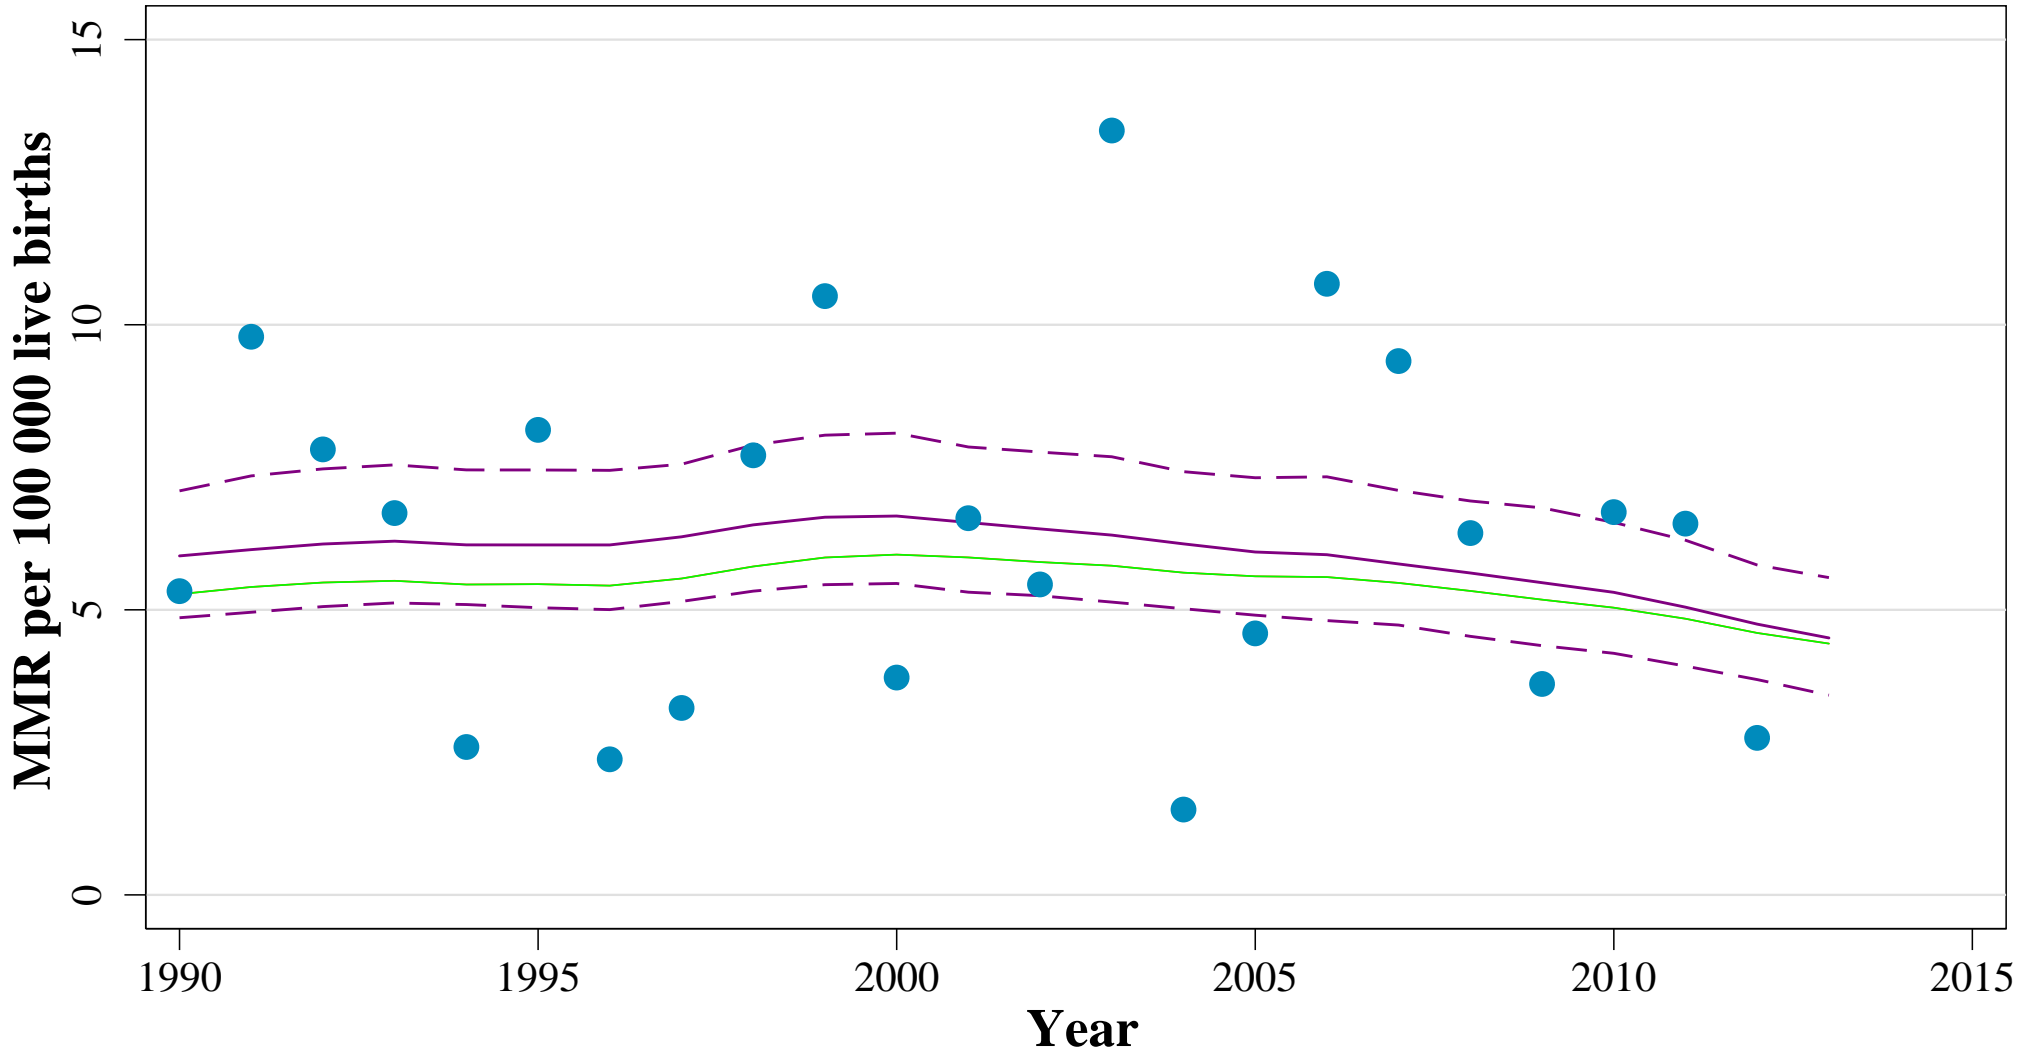

# Oman

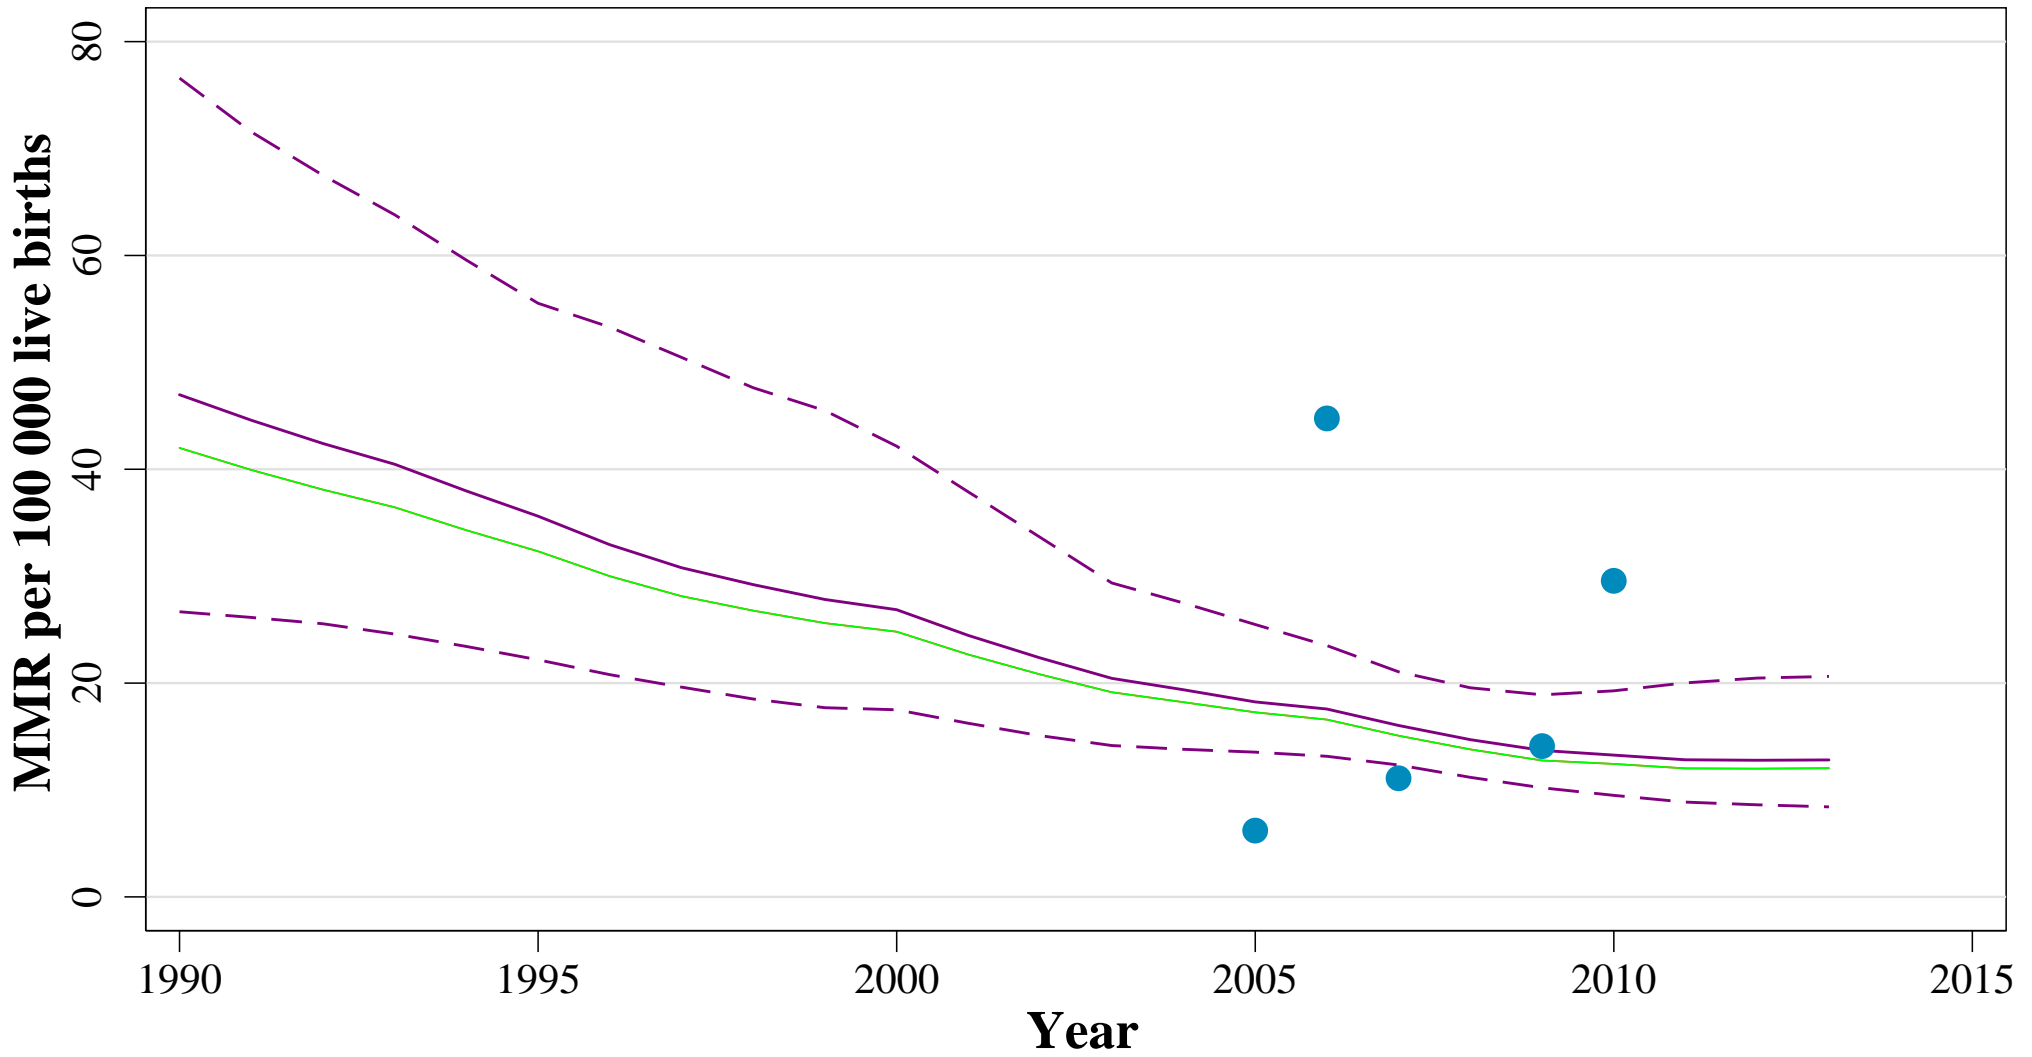

# Pakistan

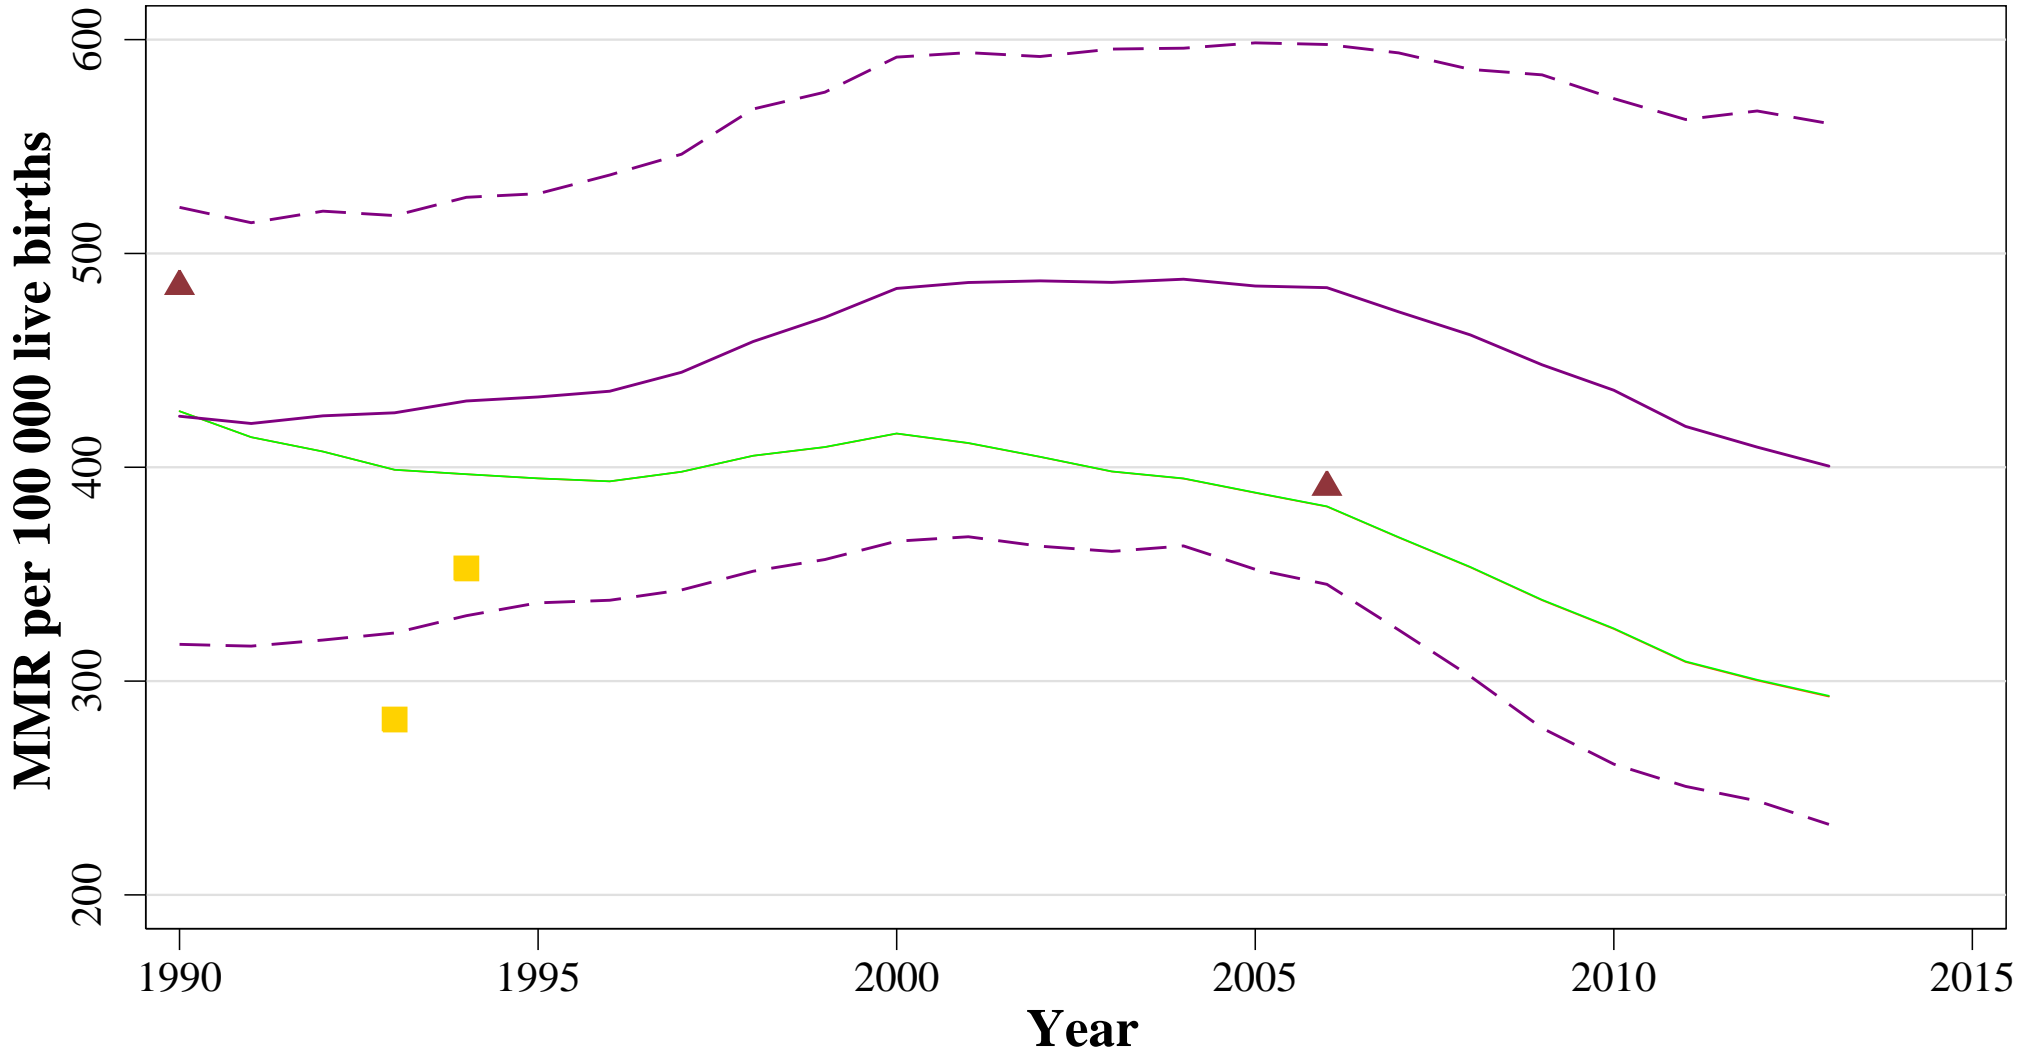

# Palestine

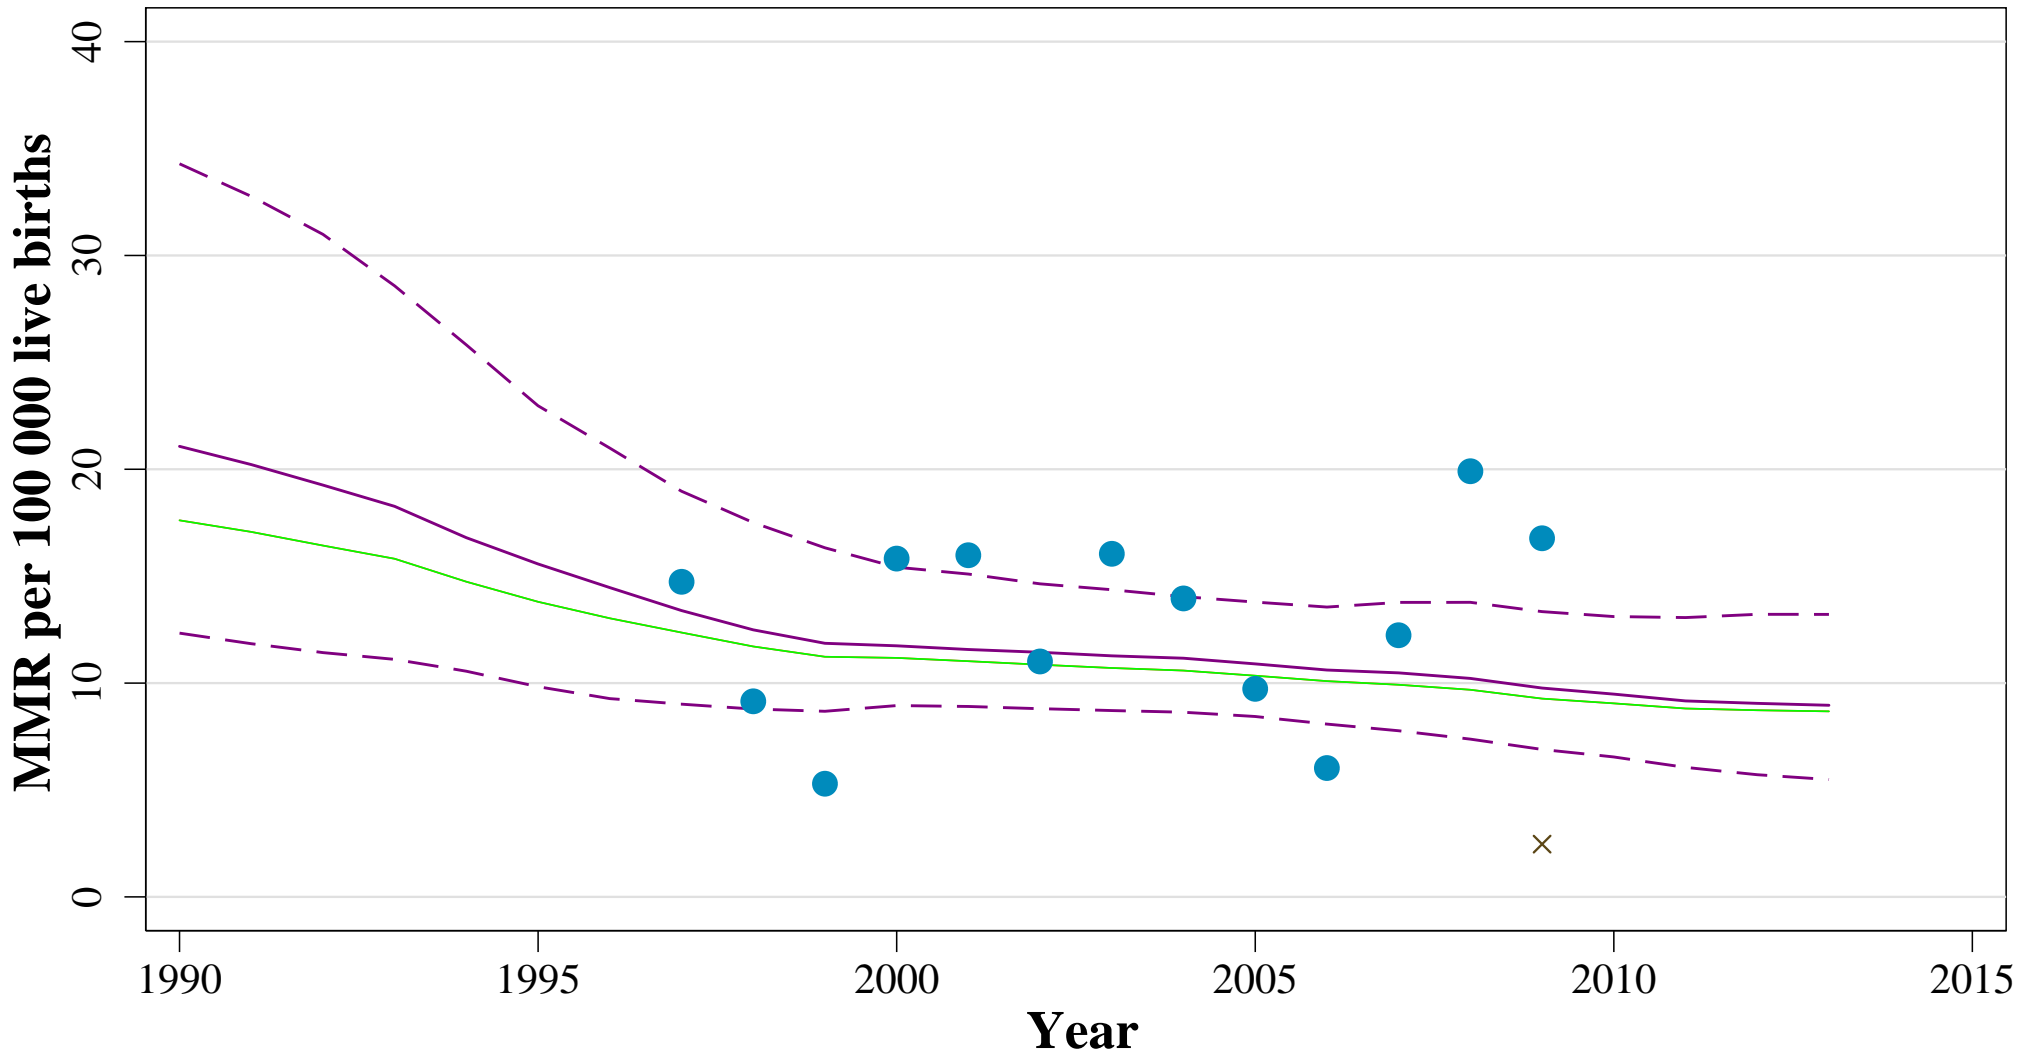

# Panama

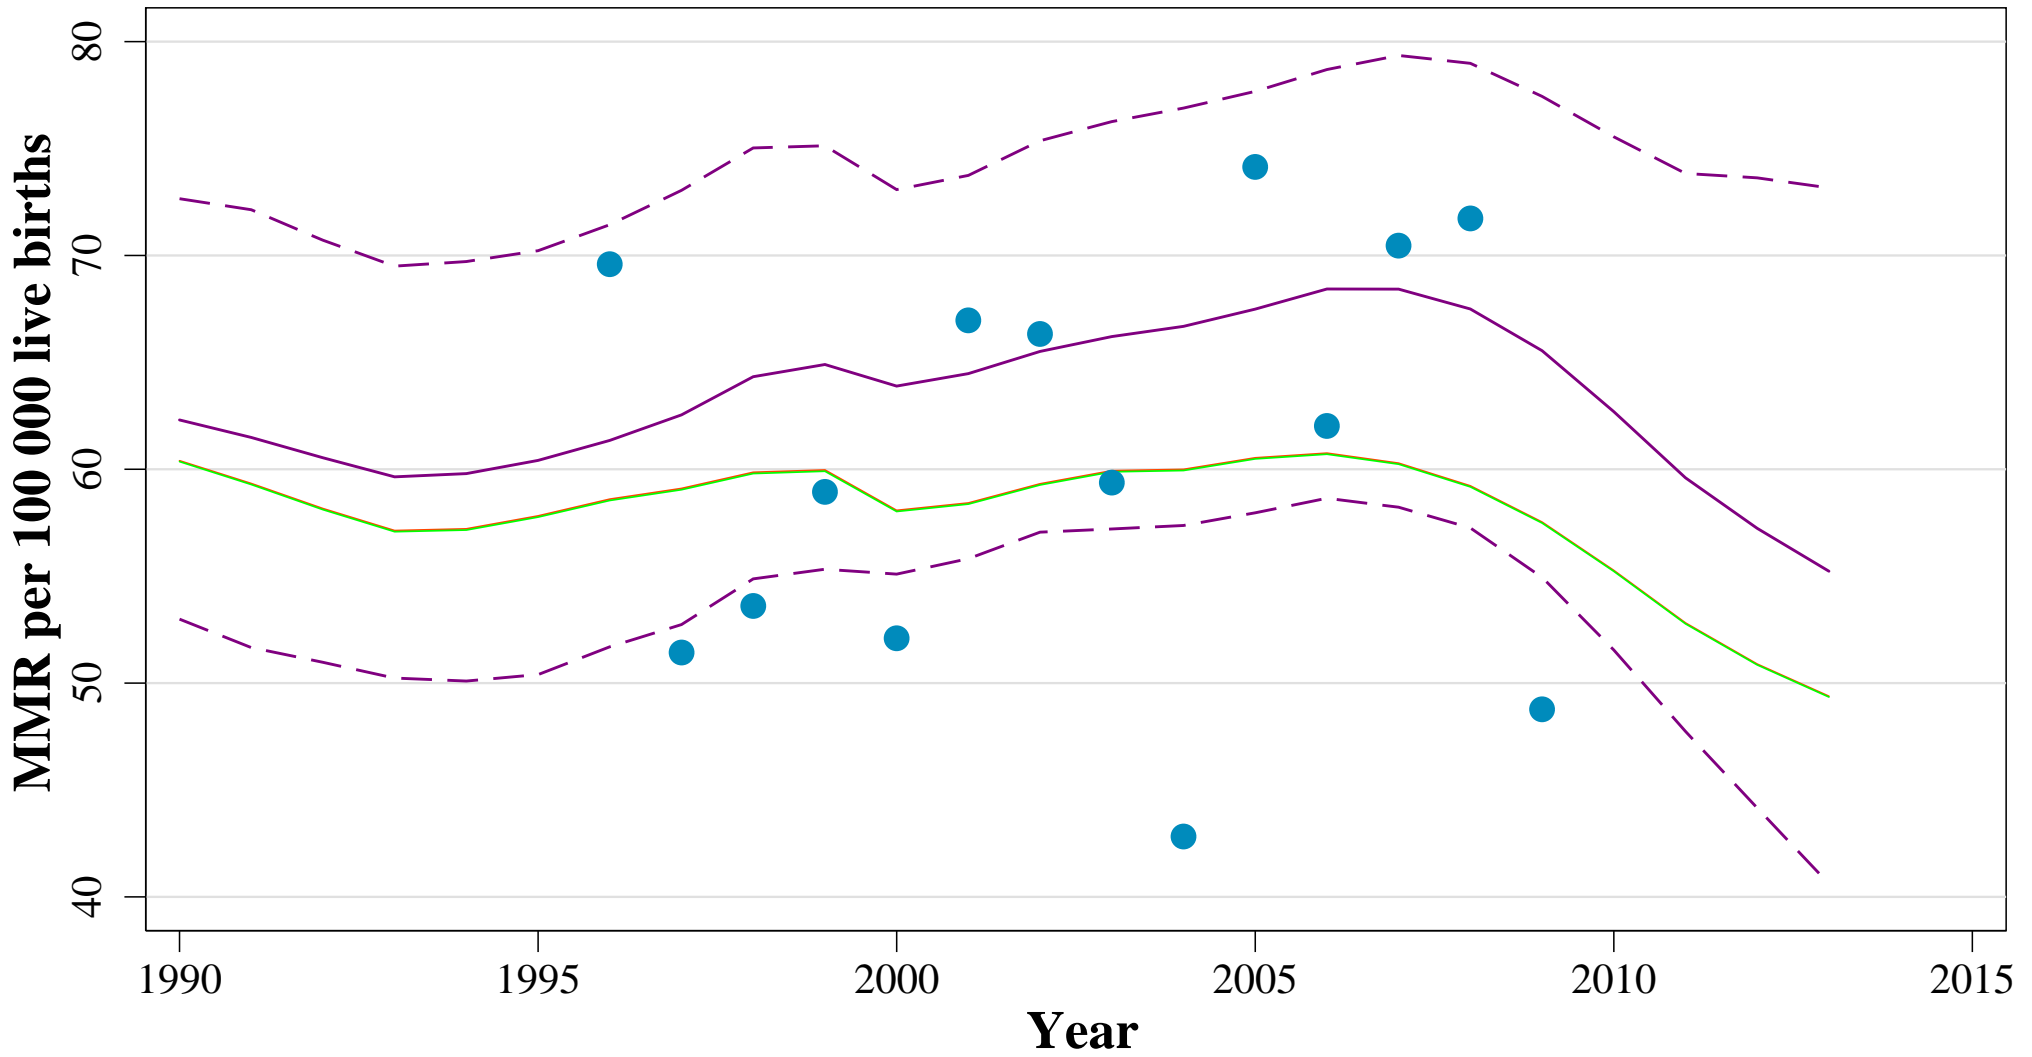

# Papua New Guinea

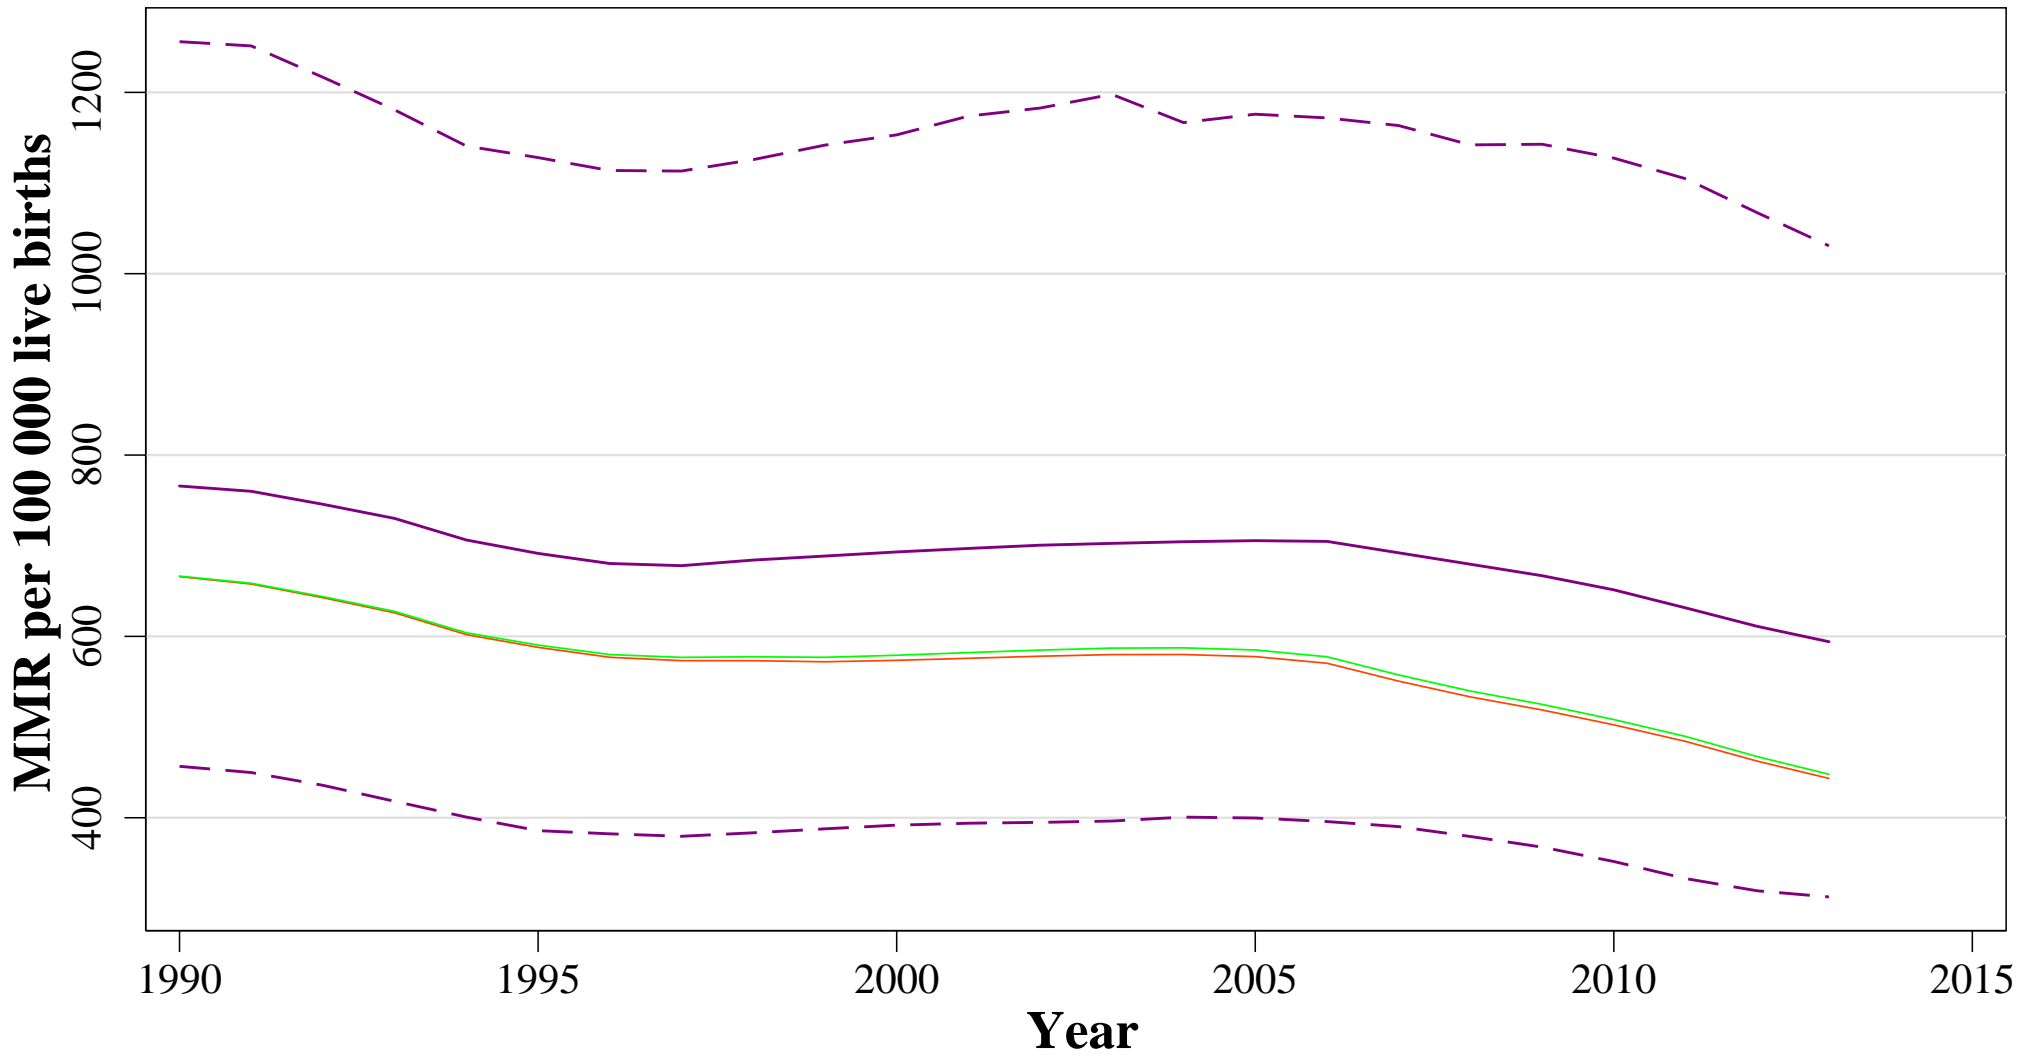



# Paraguay

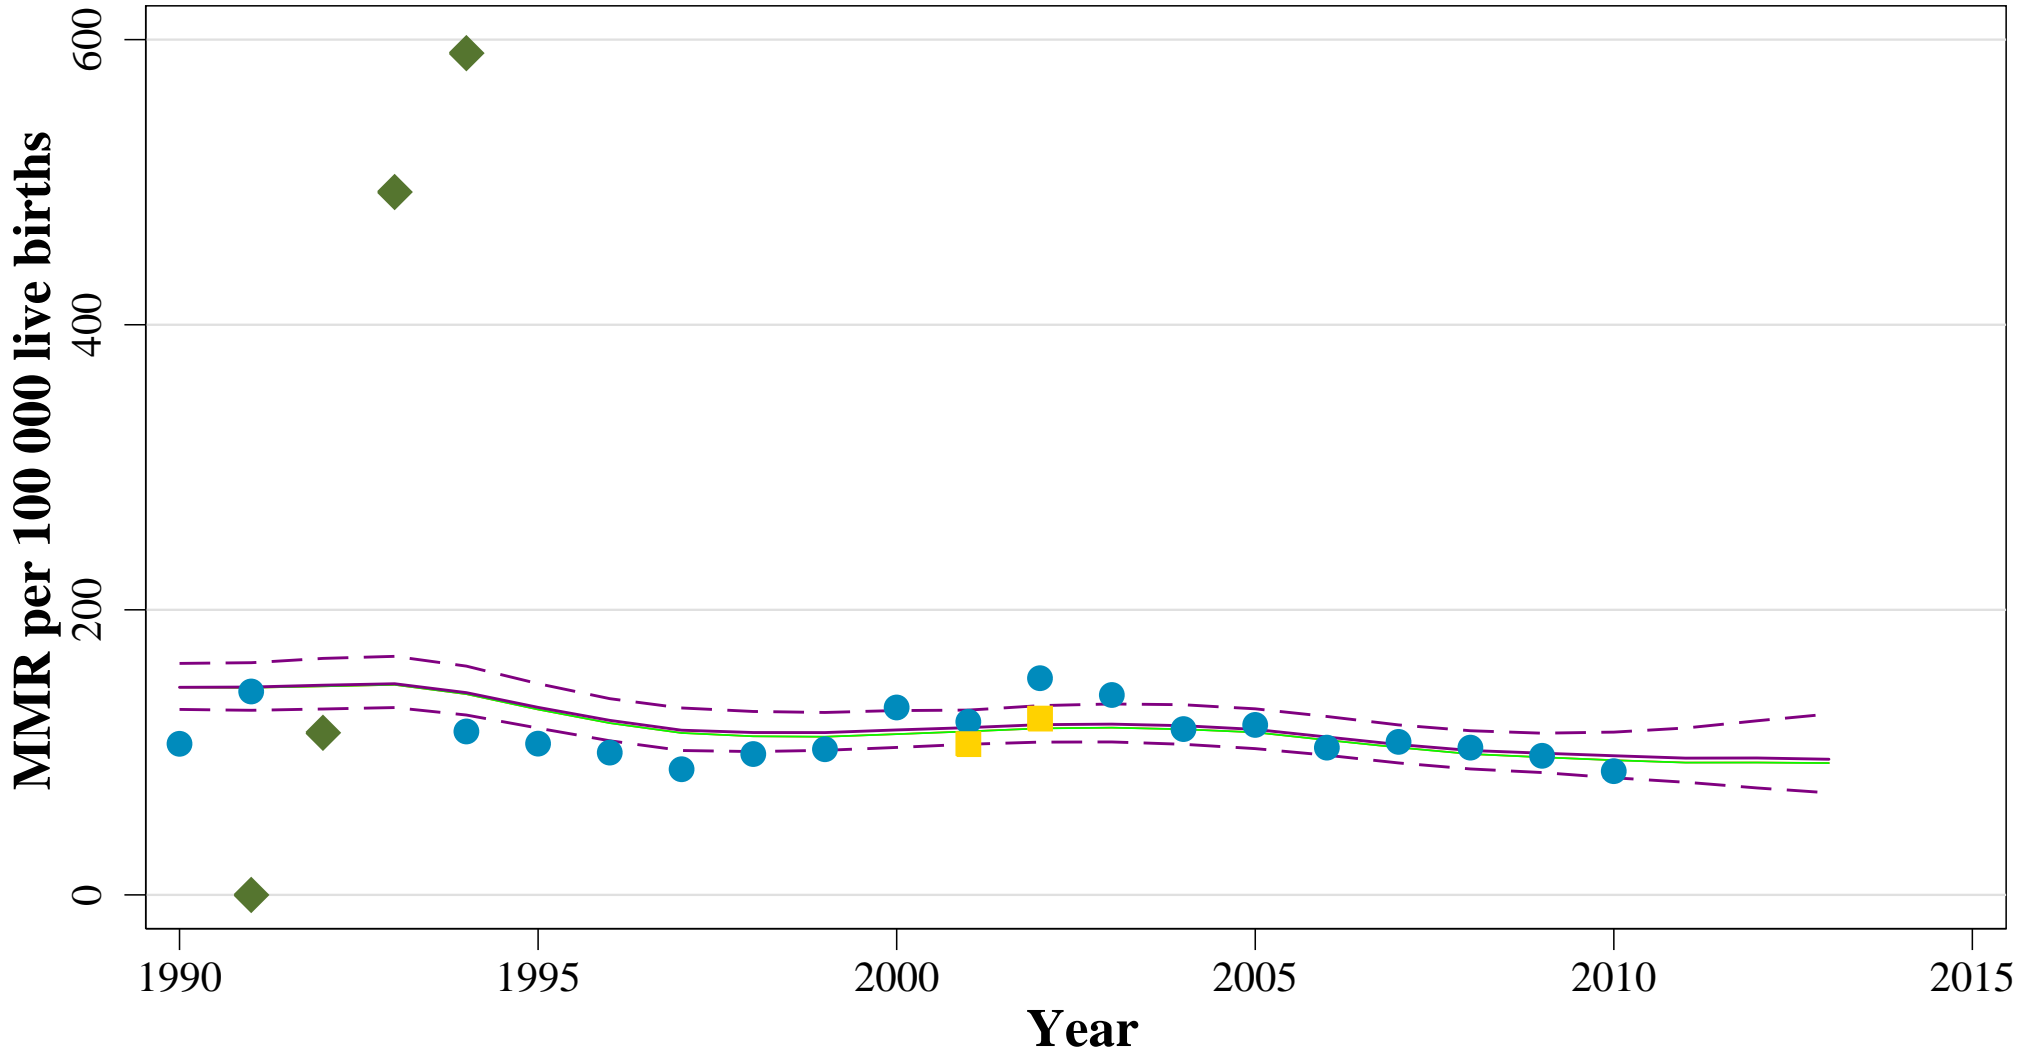

# Peru

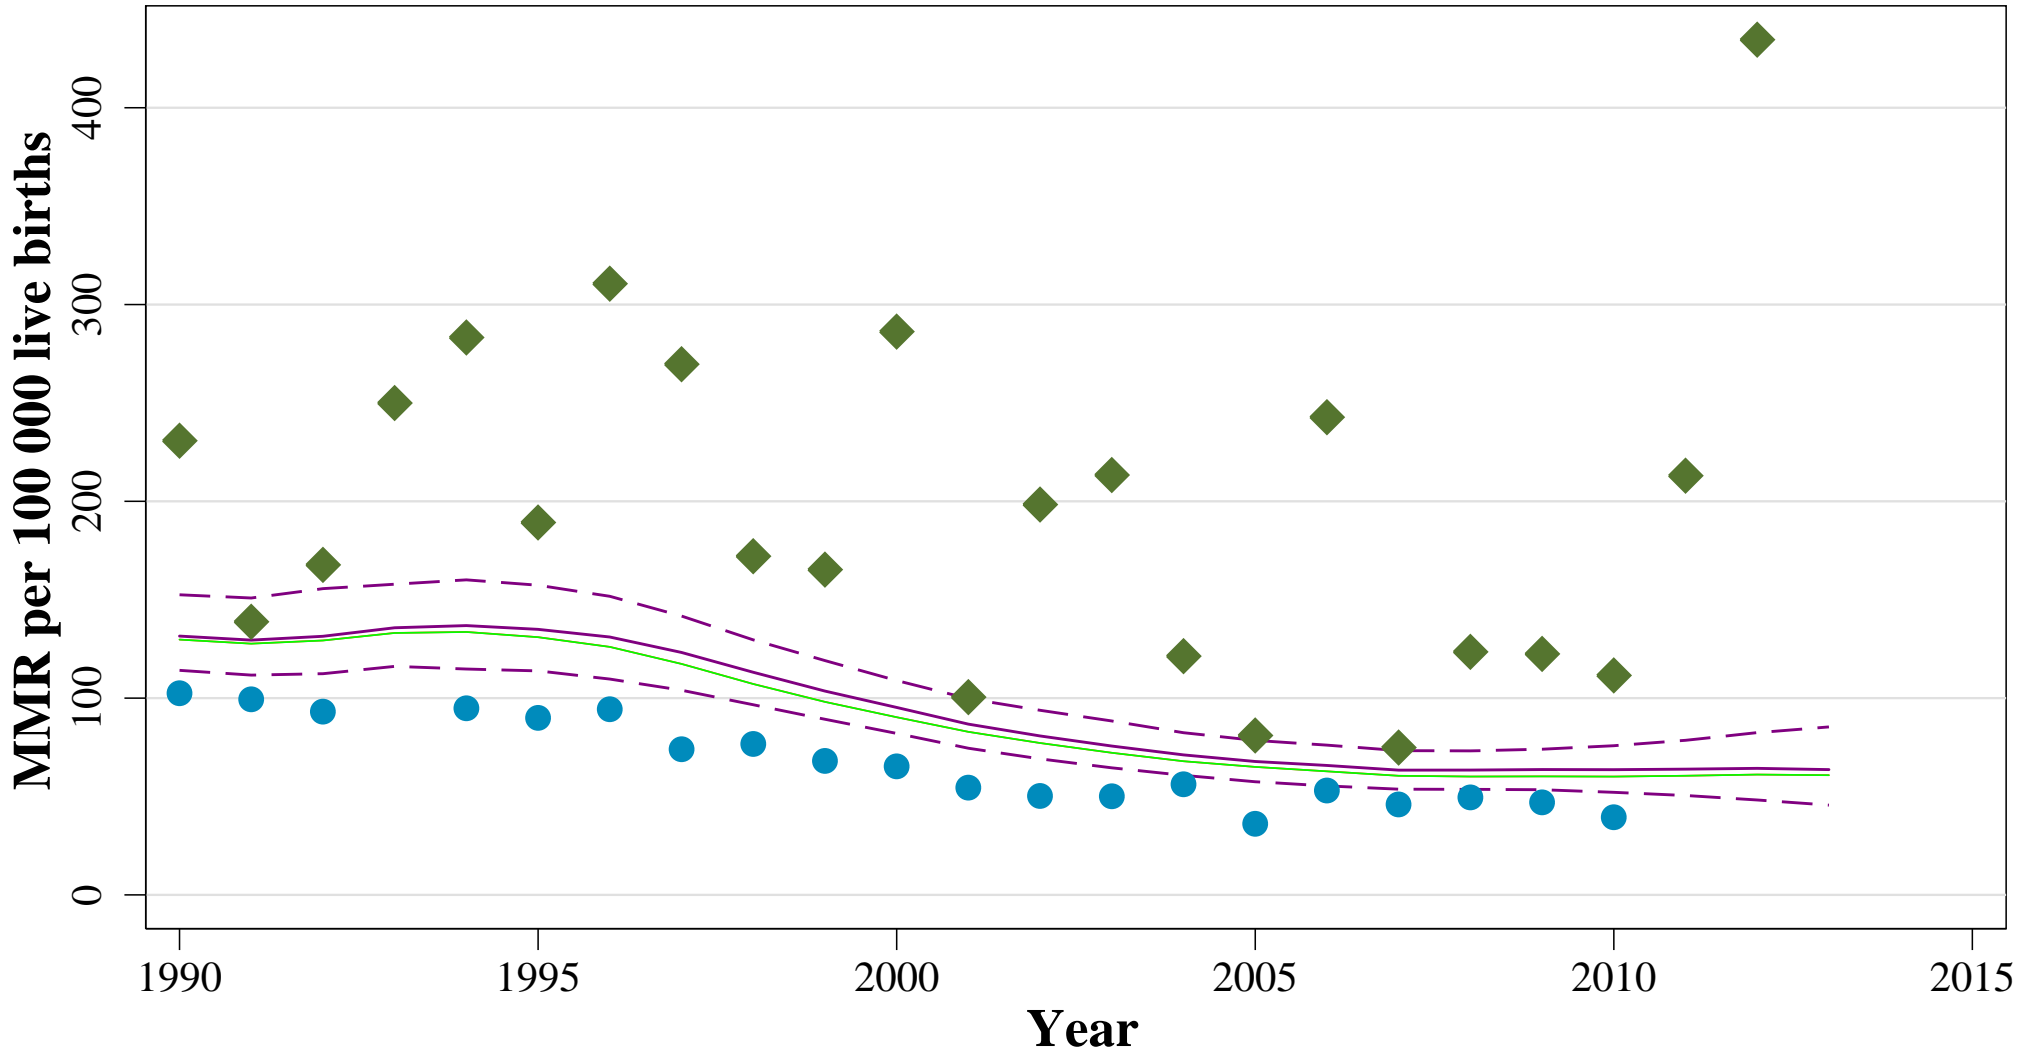

# Philippines

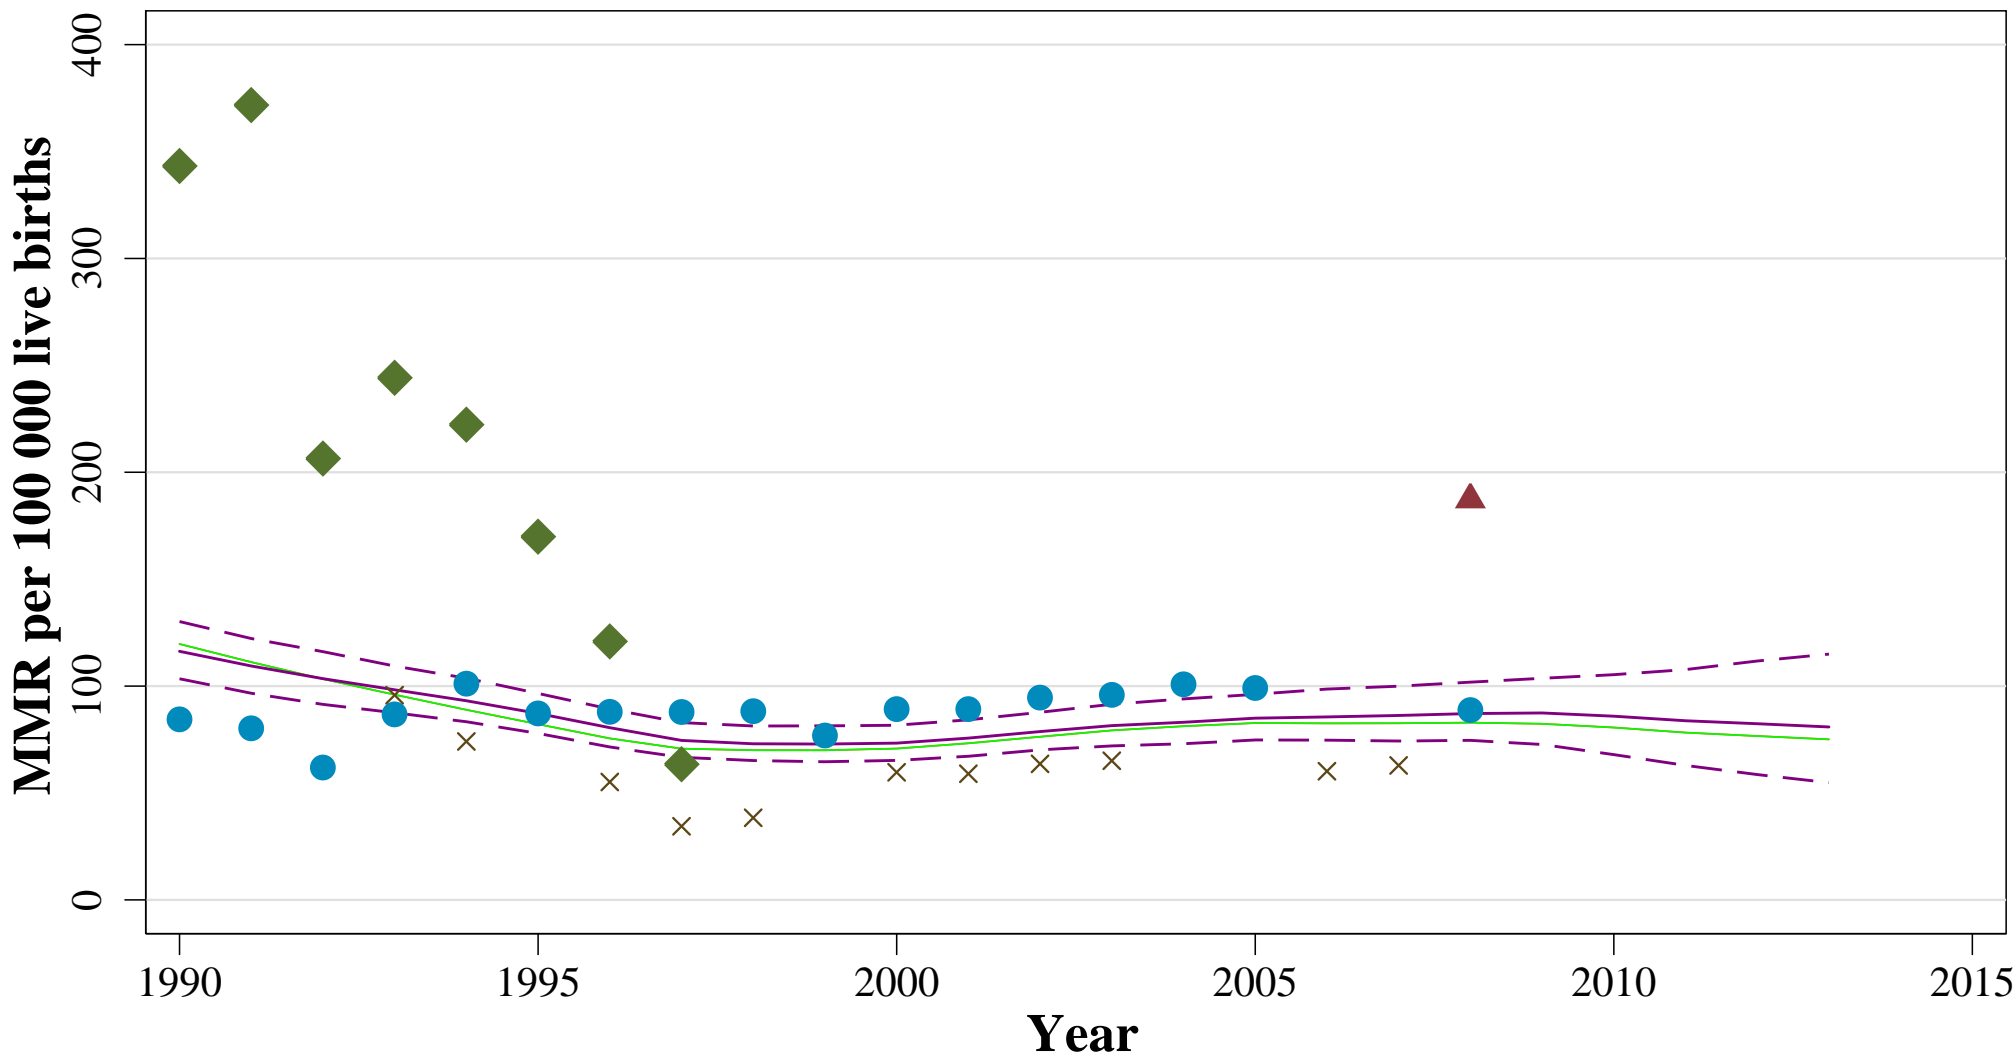

# Poland

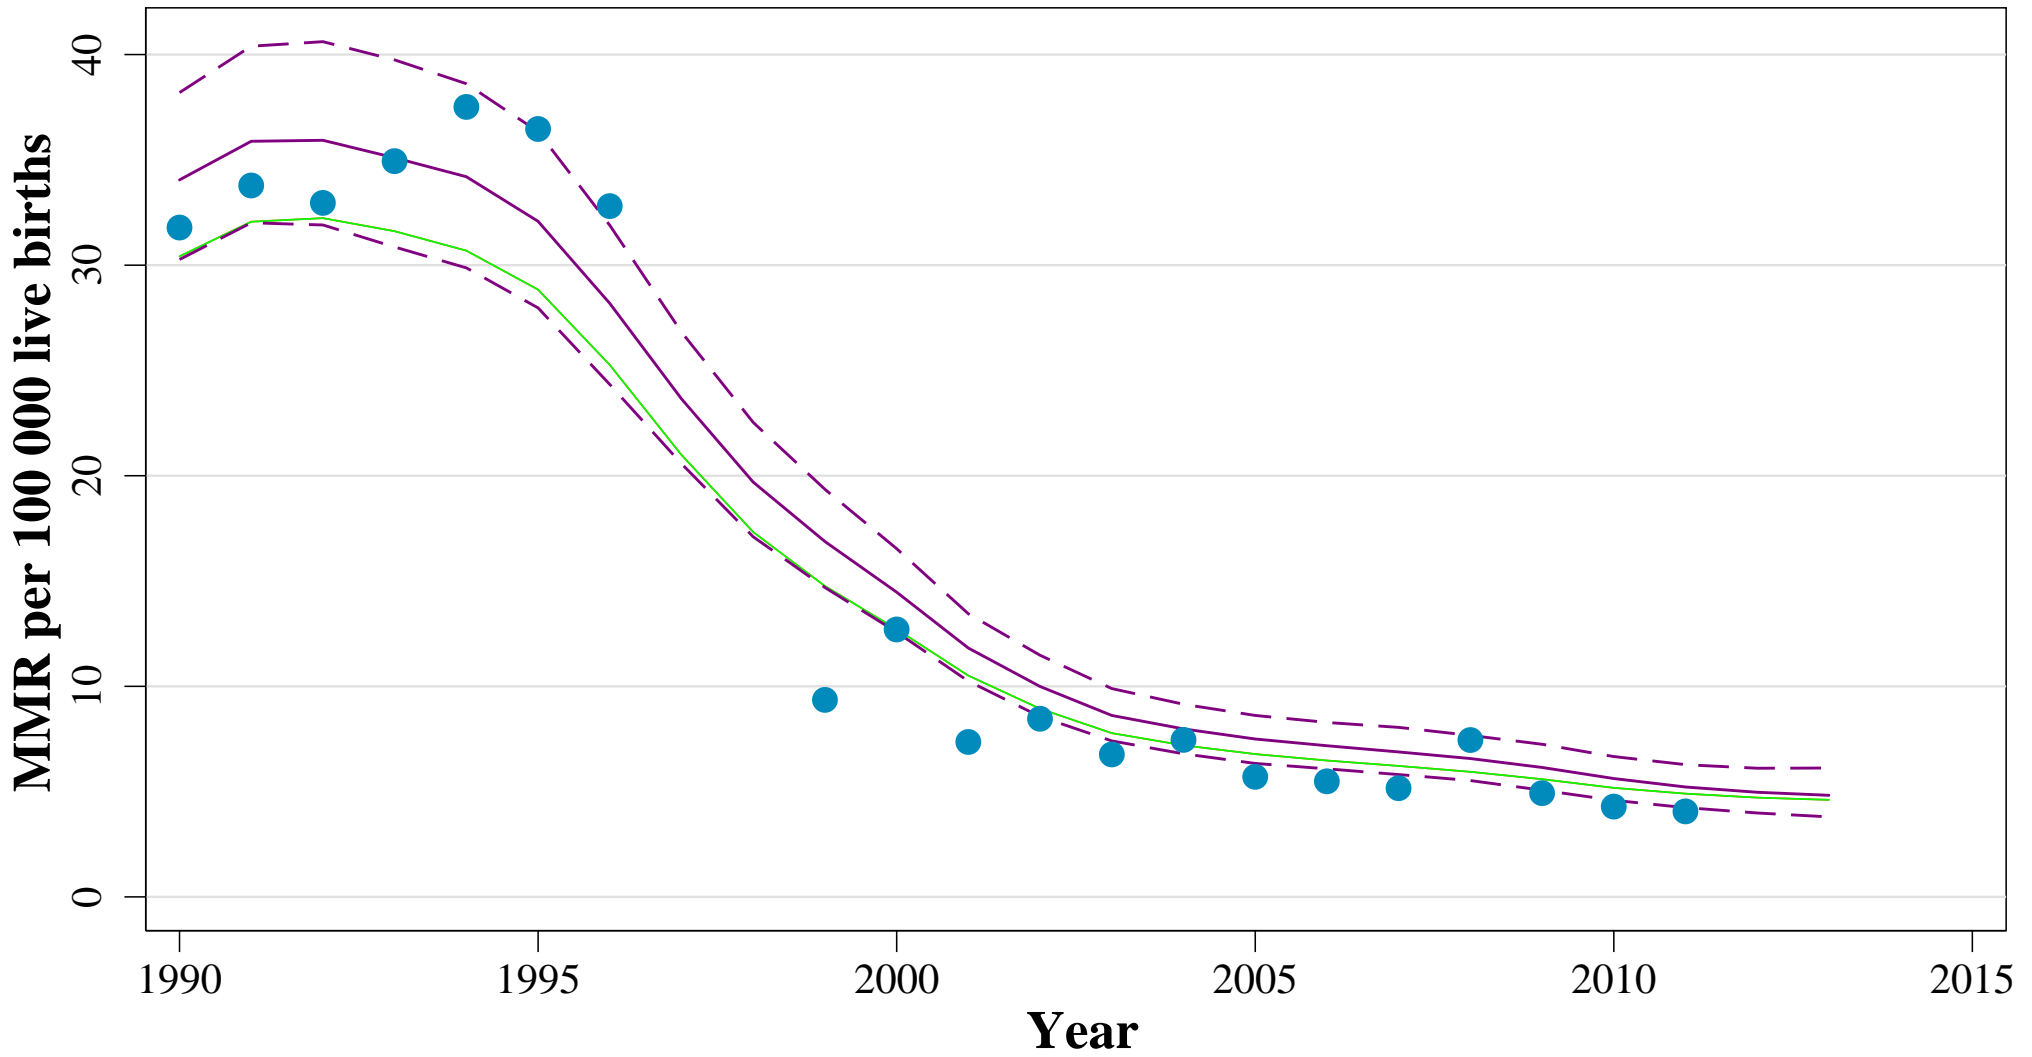

# Portugal

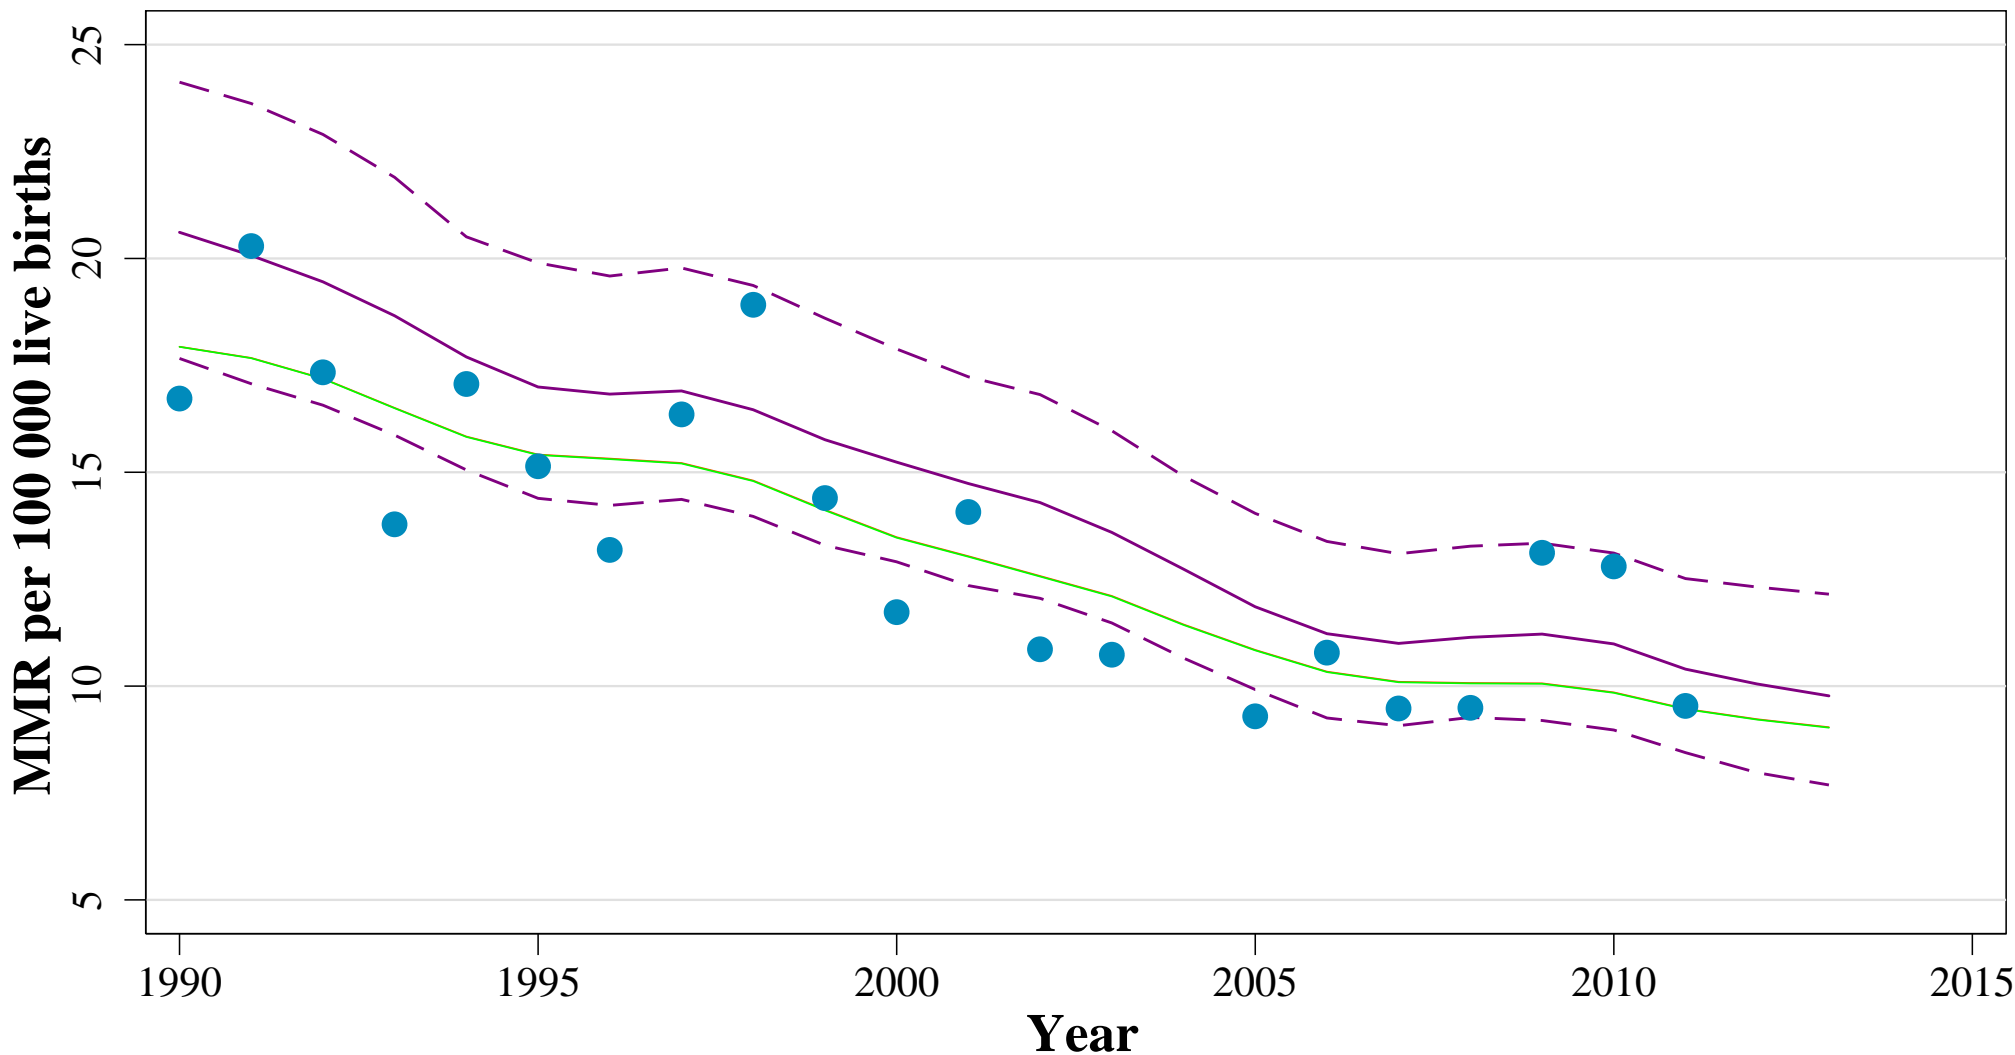

# Qatar

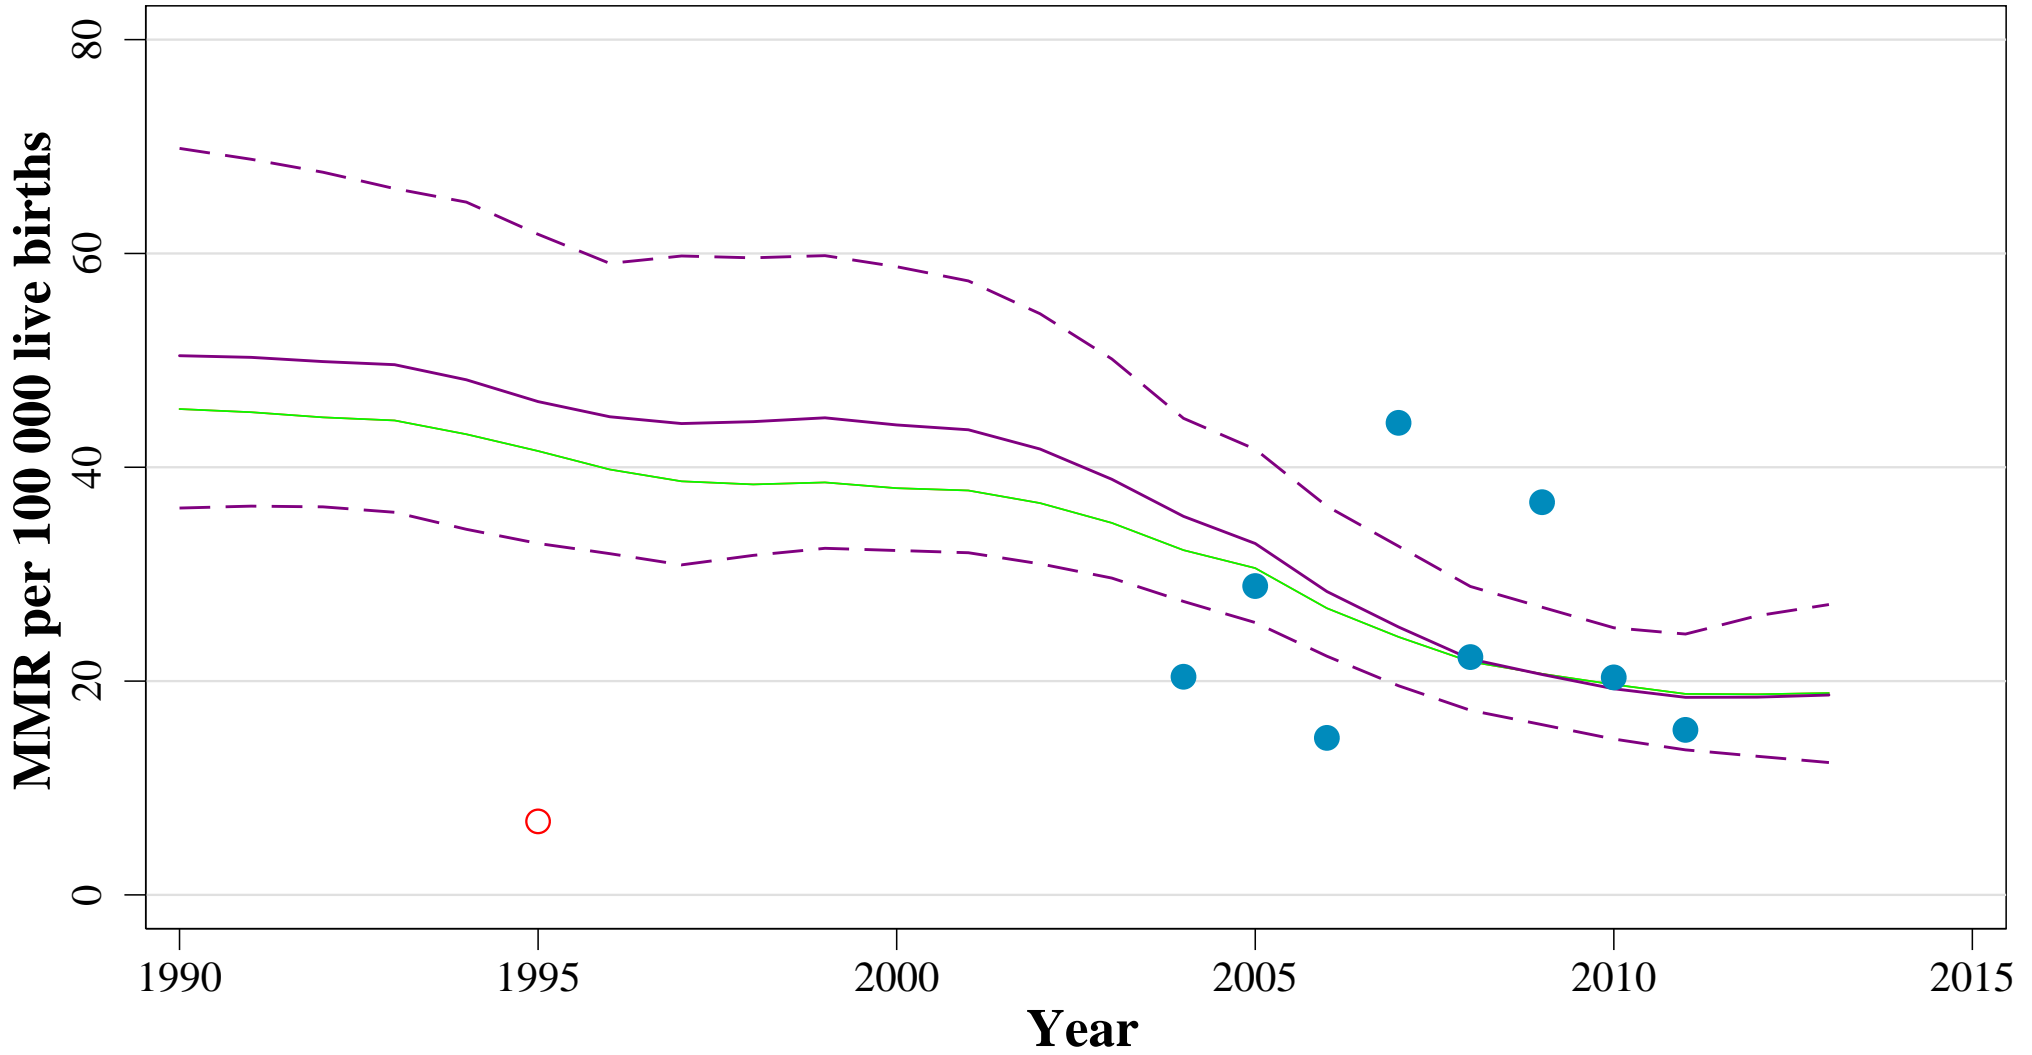

# Romania

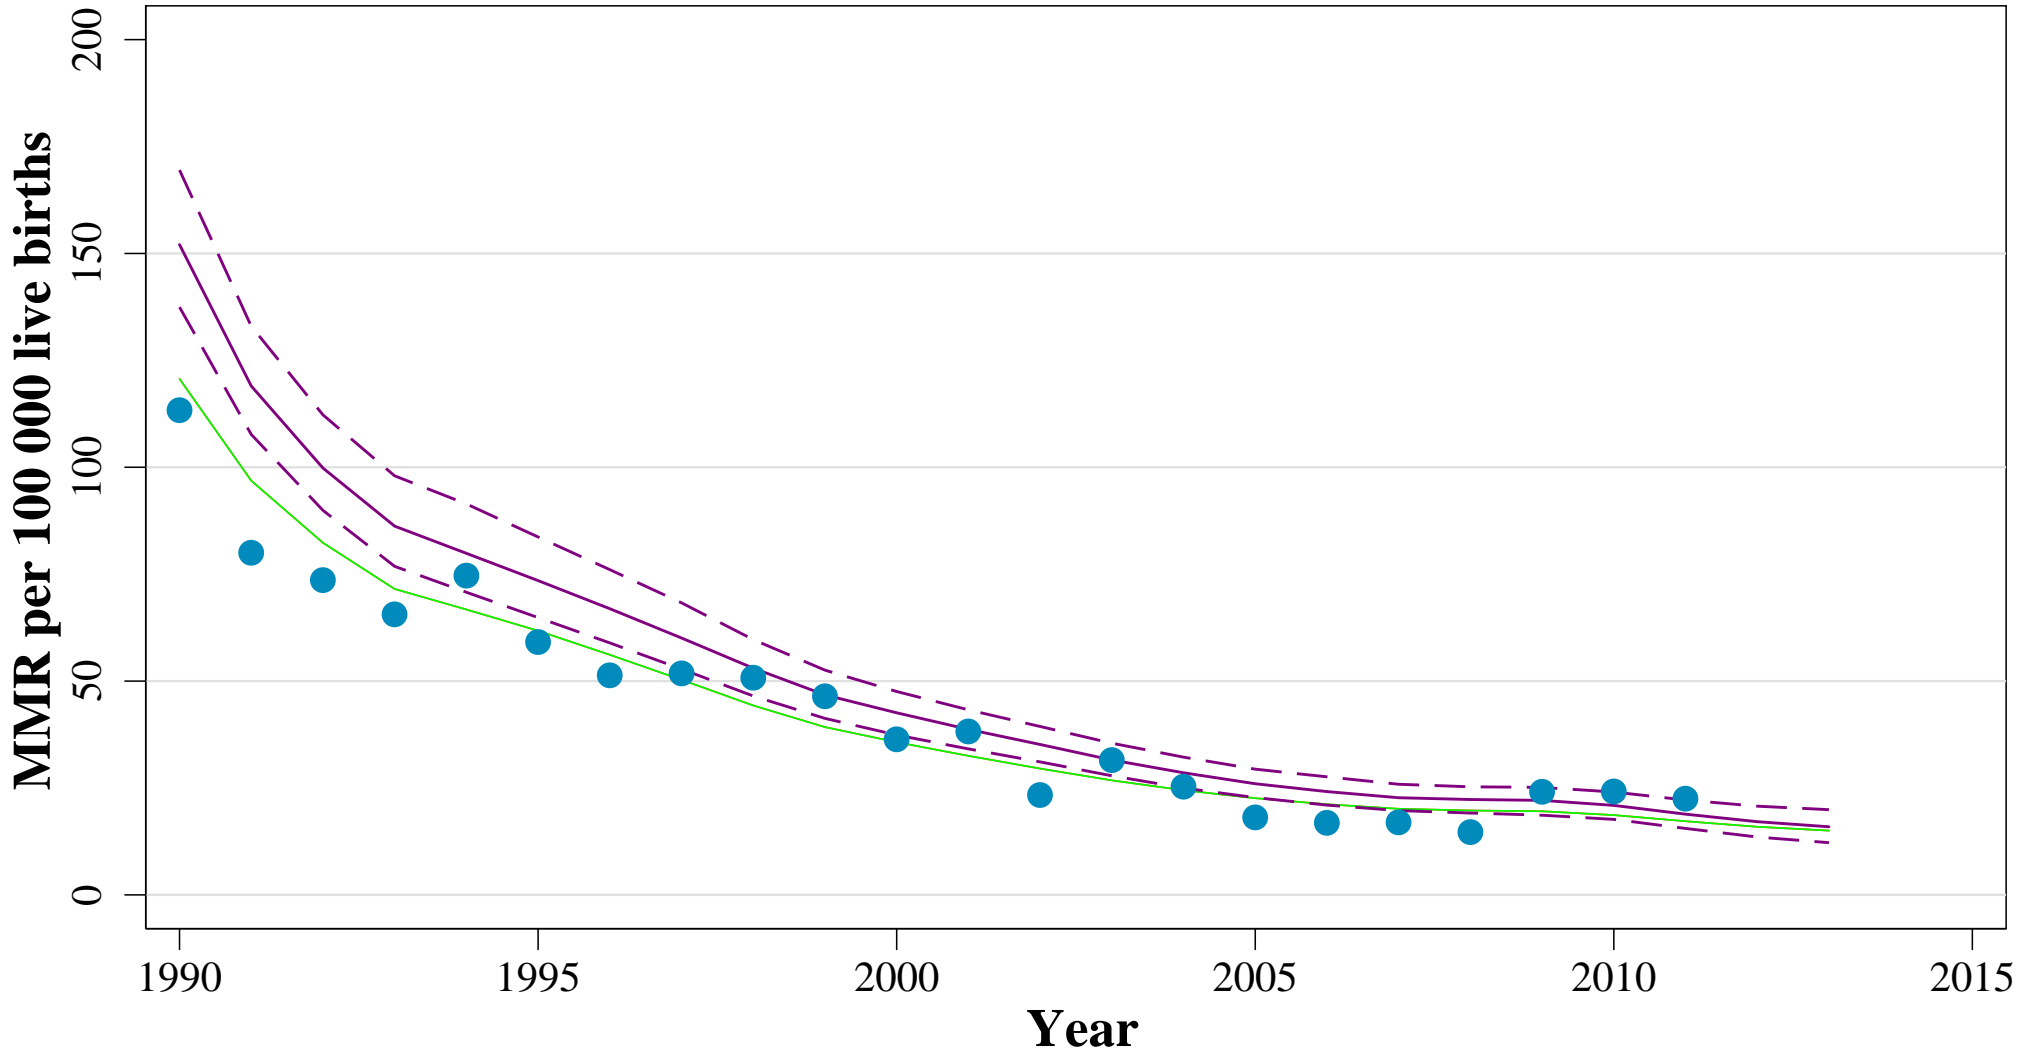

# Russia

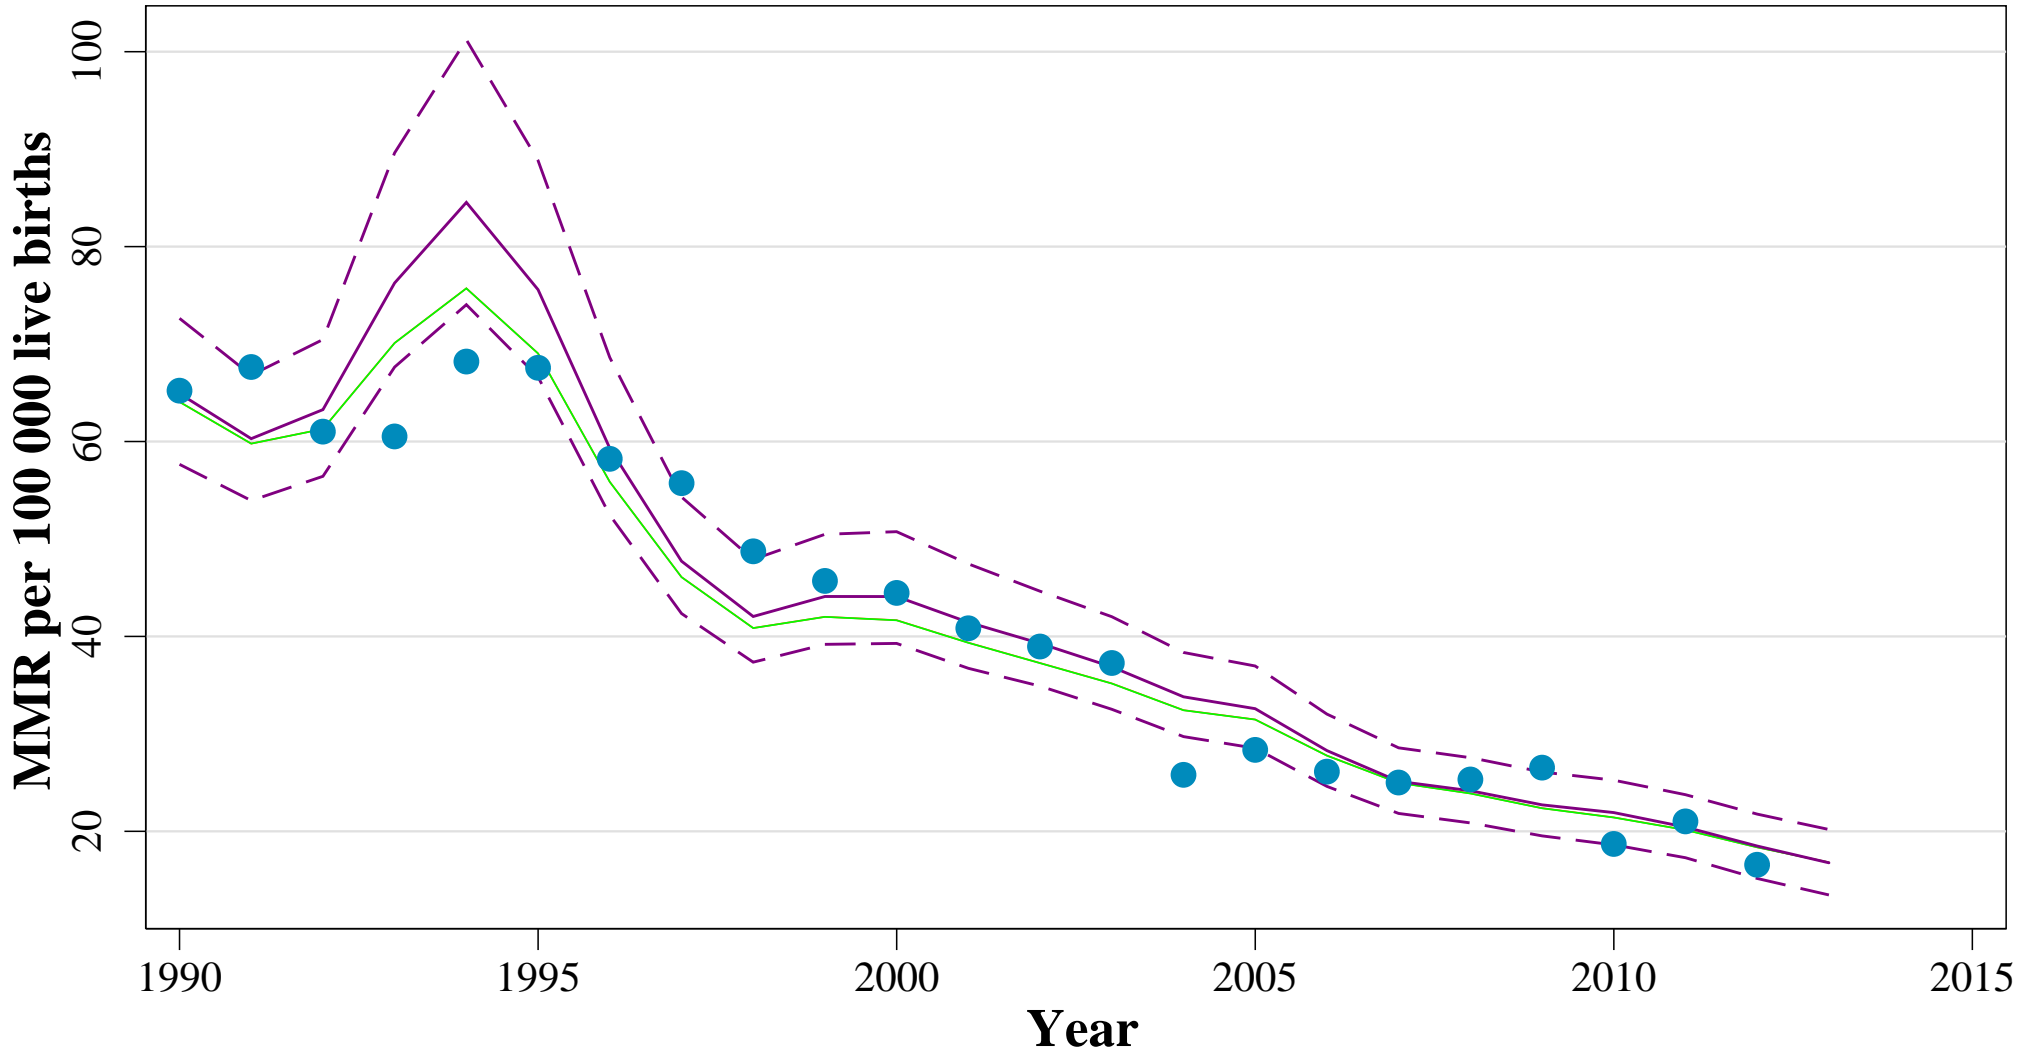



# Rwanda

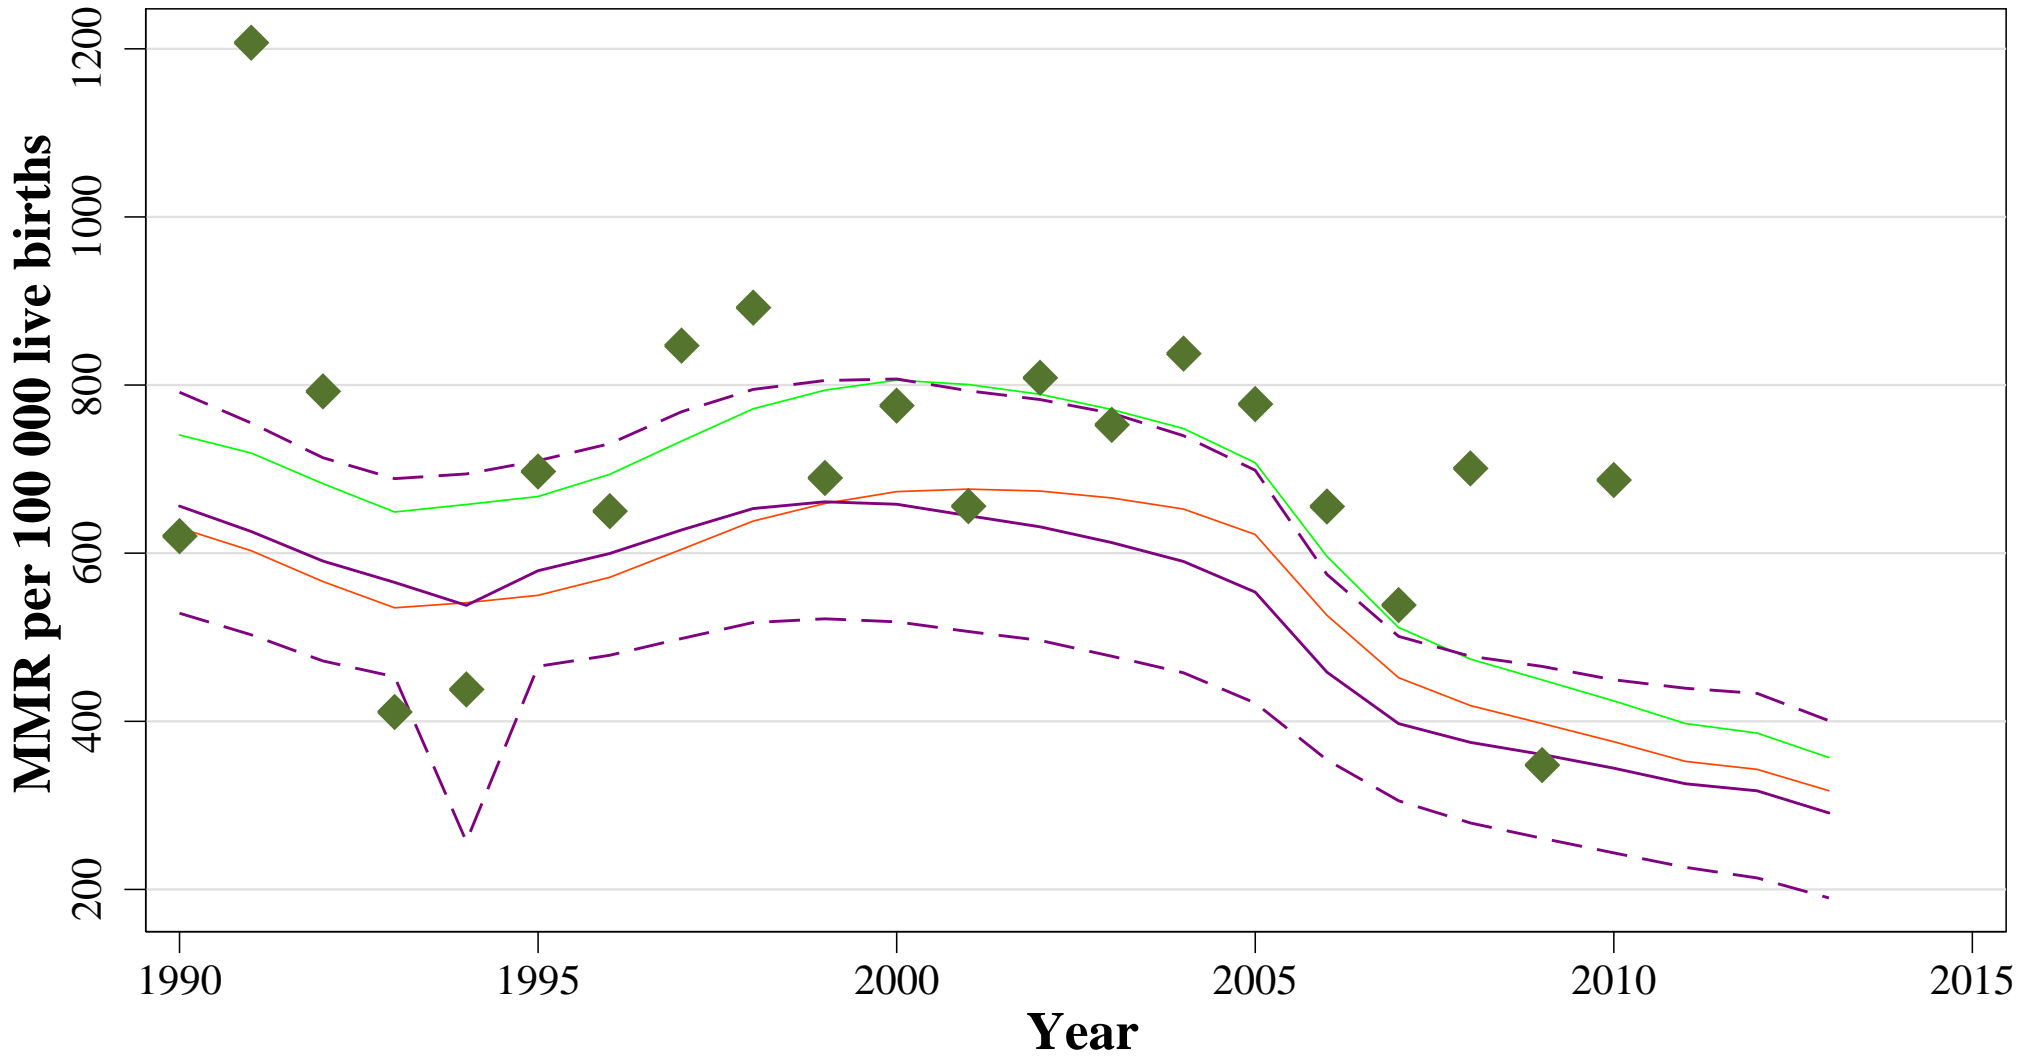

# Saint Lucia

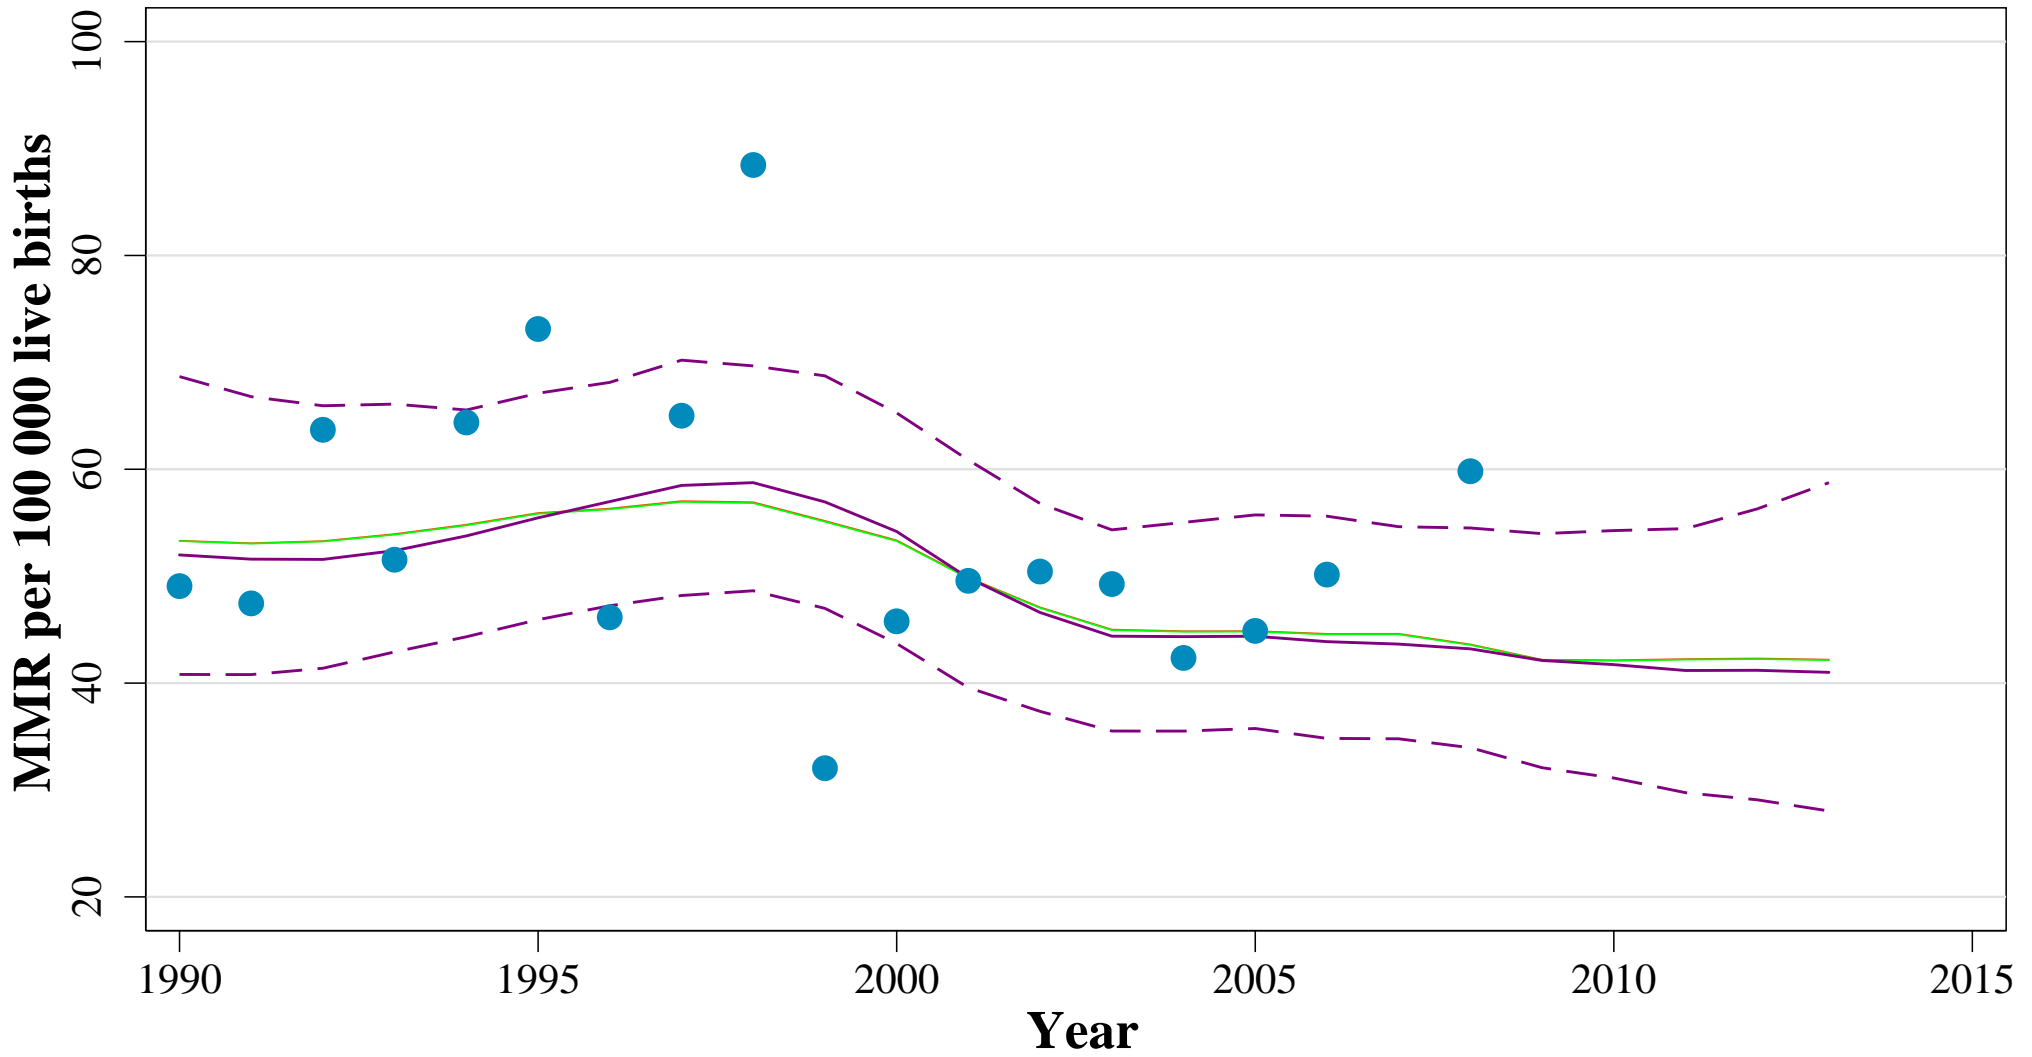

# Samoa

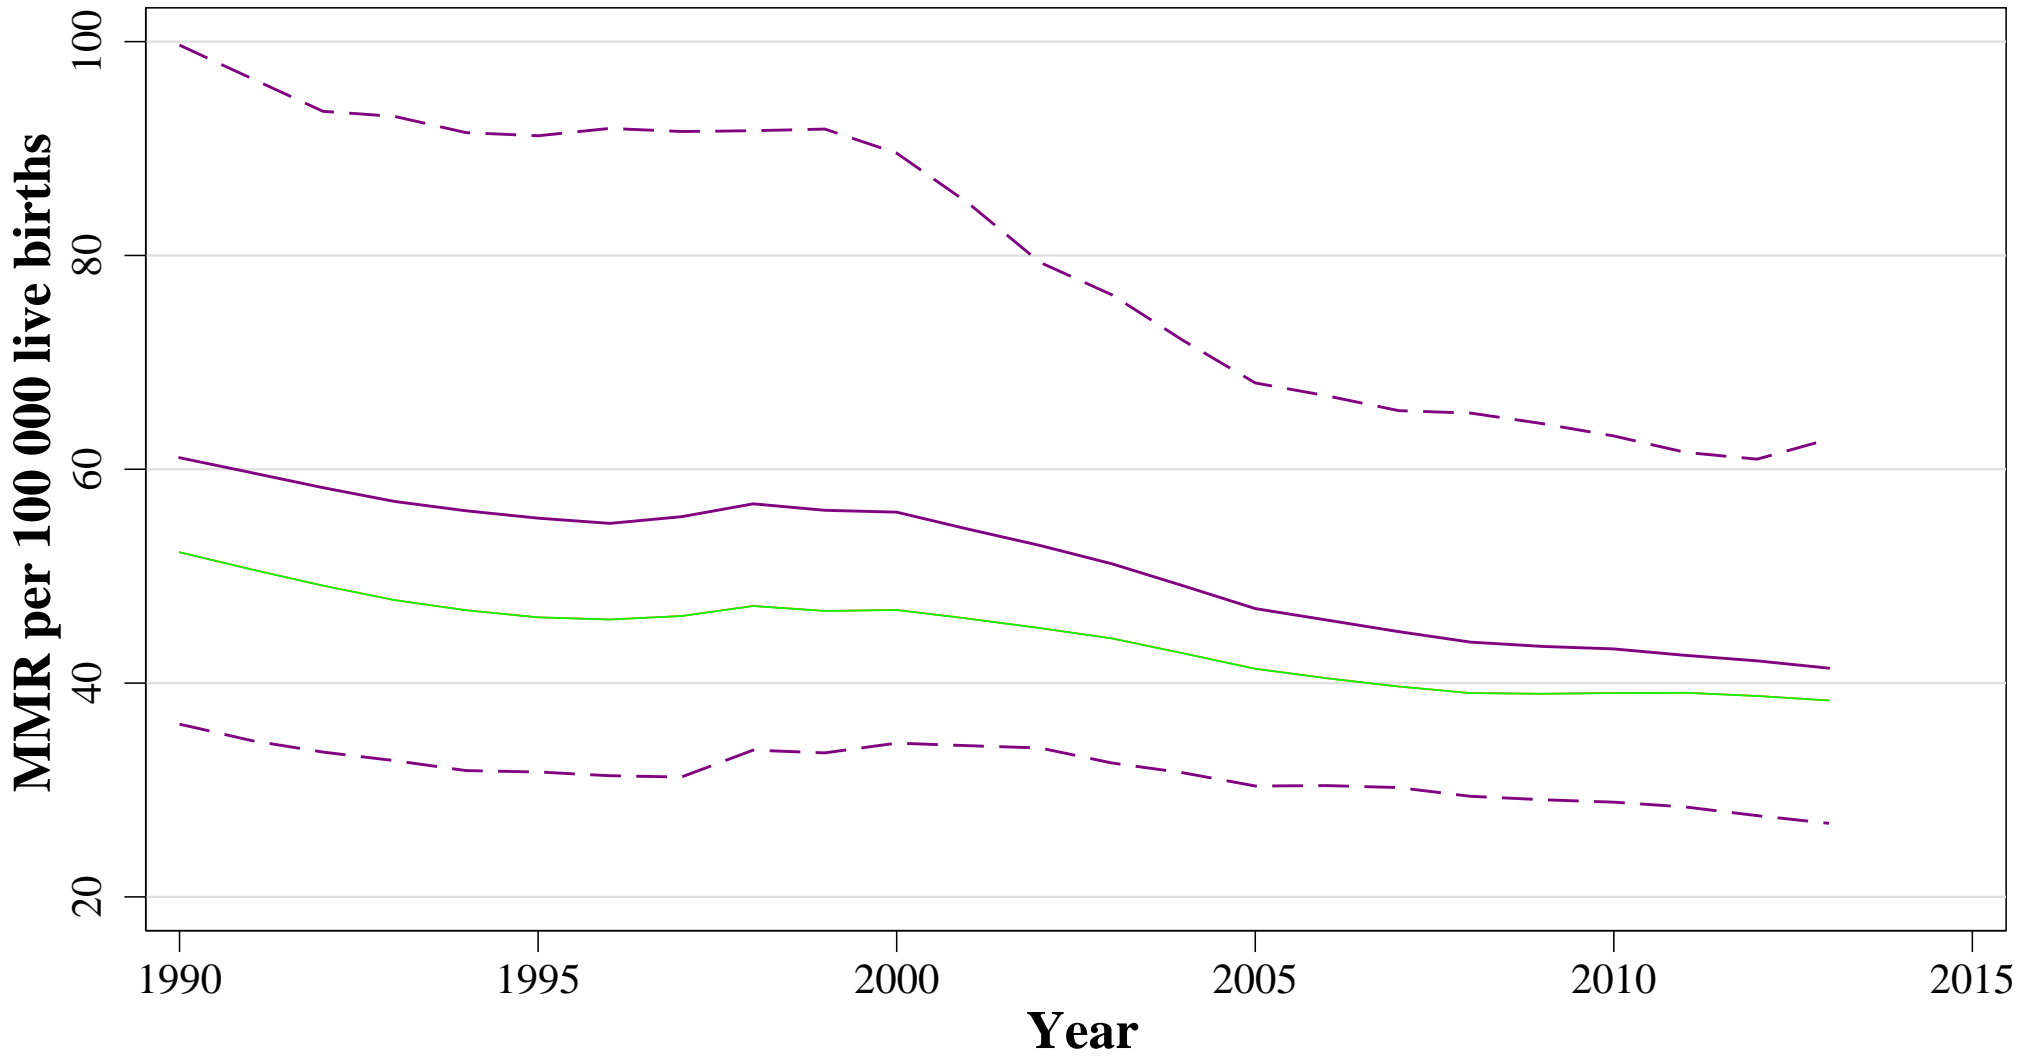

# Sao Tome and Principe

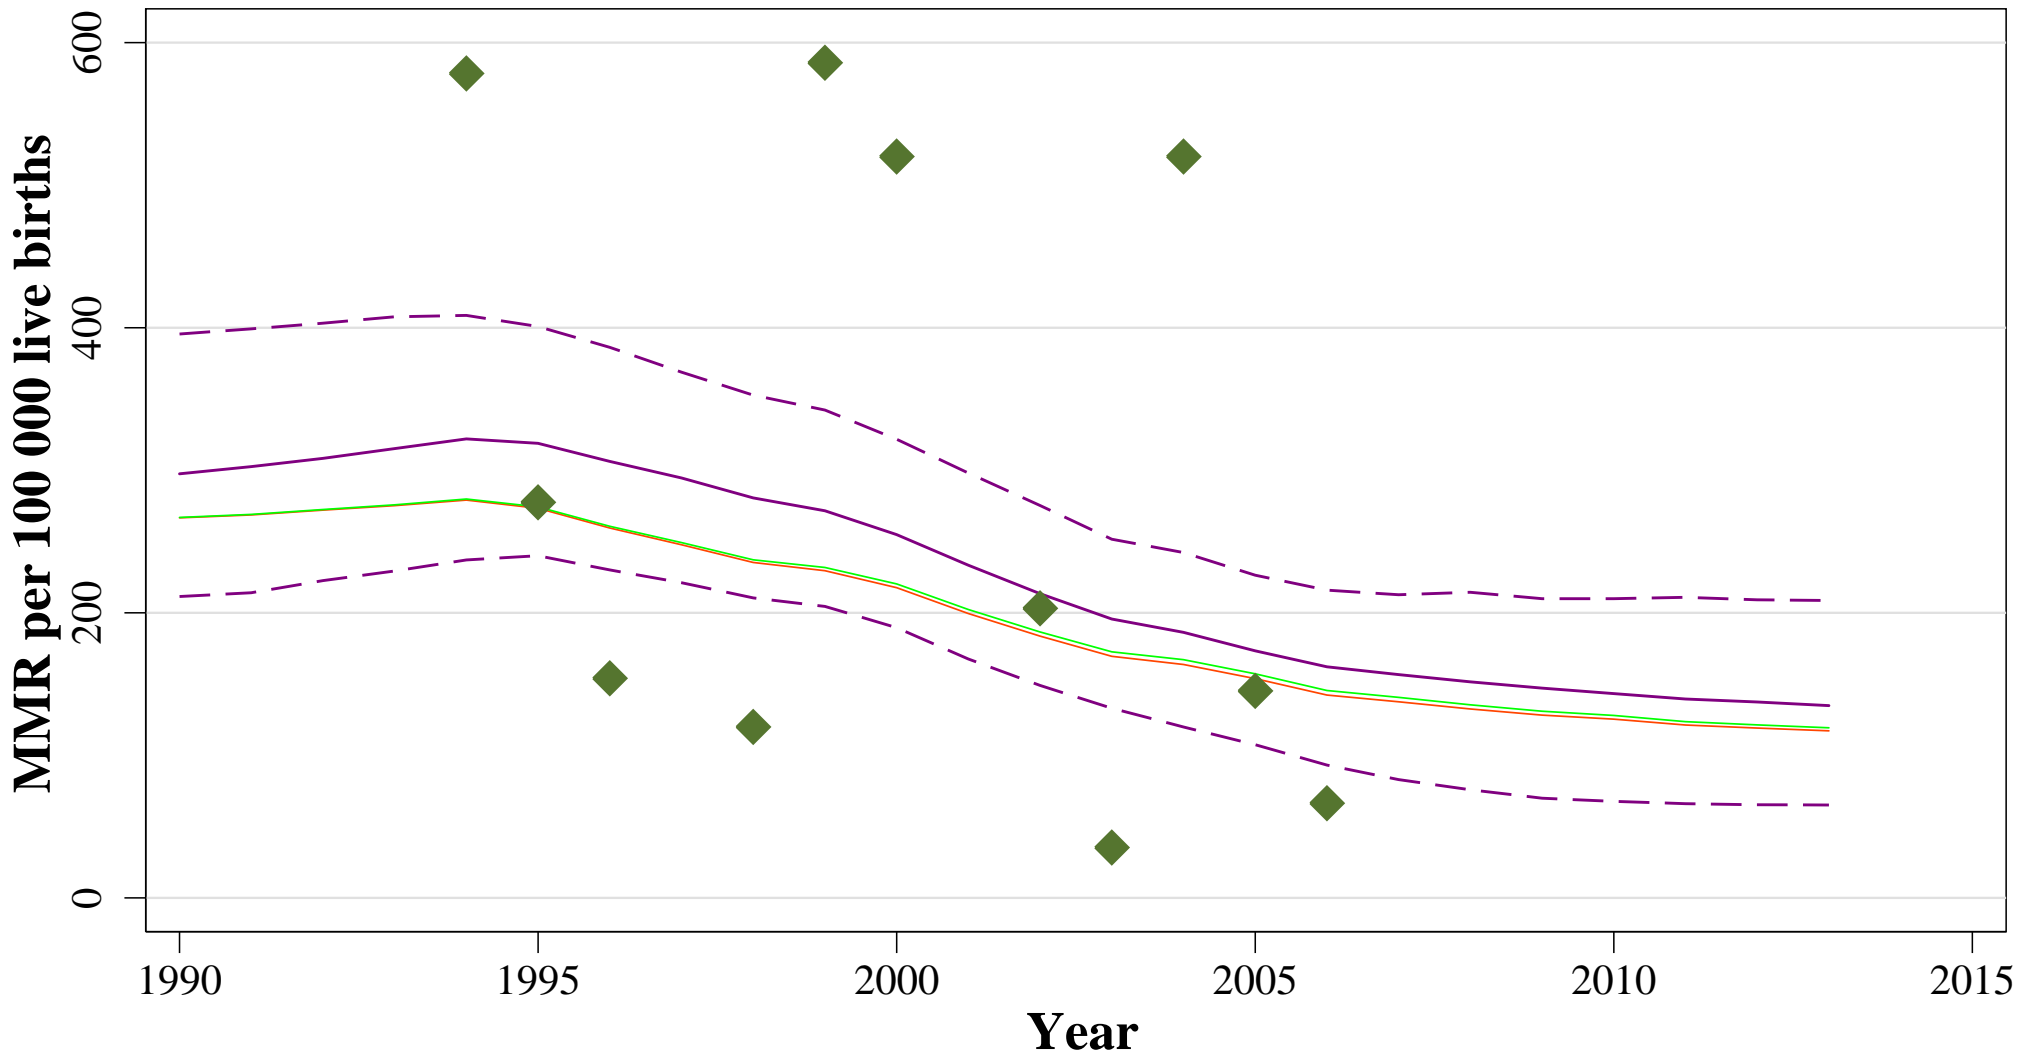

# Saudi Arabia

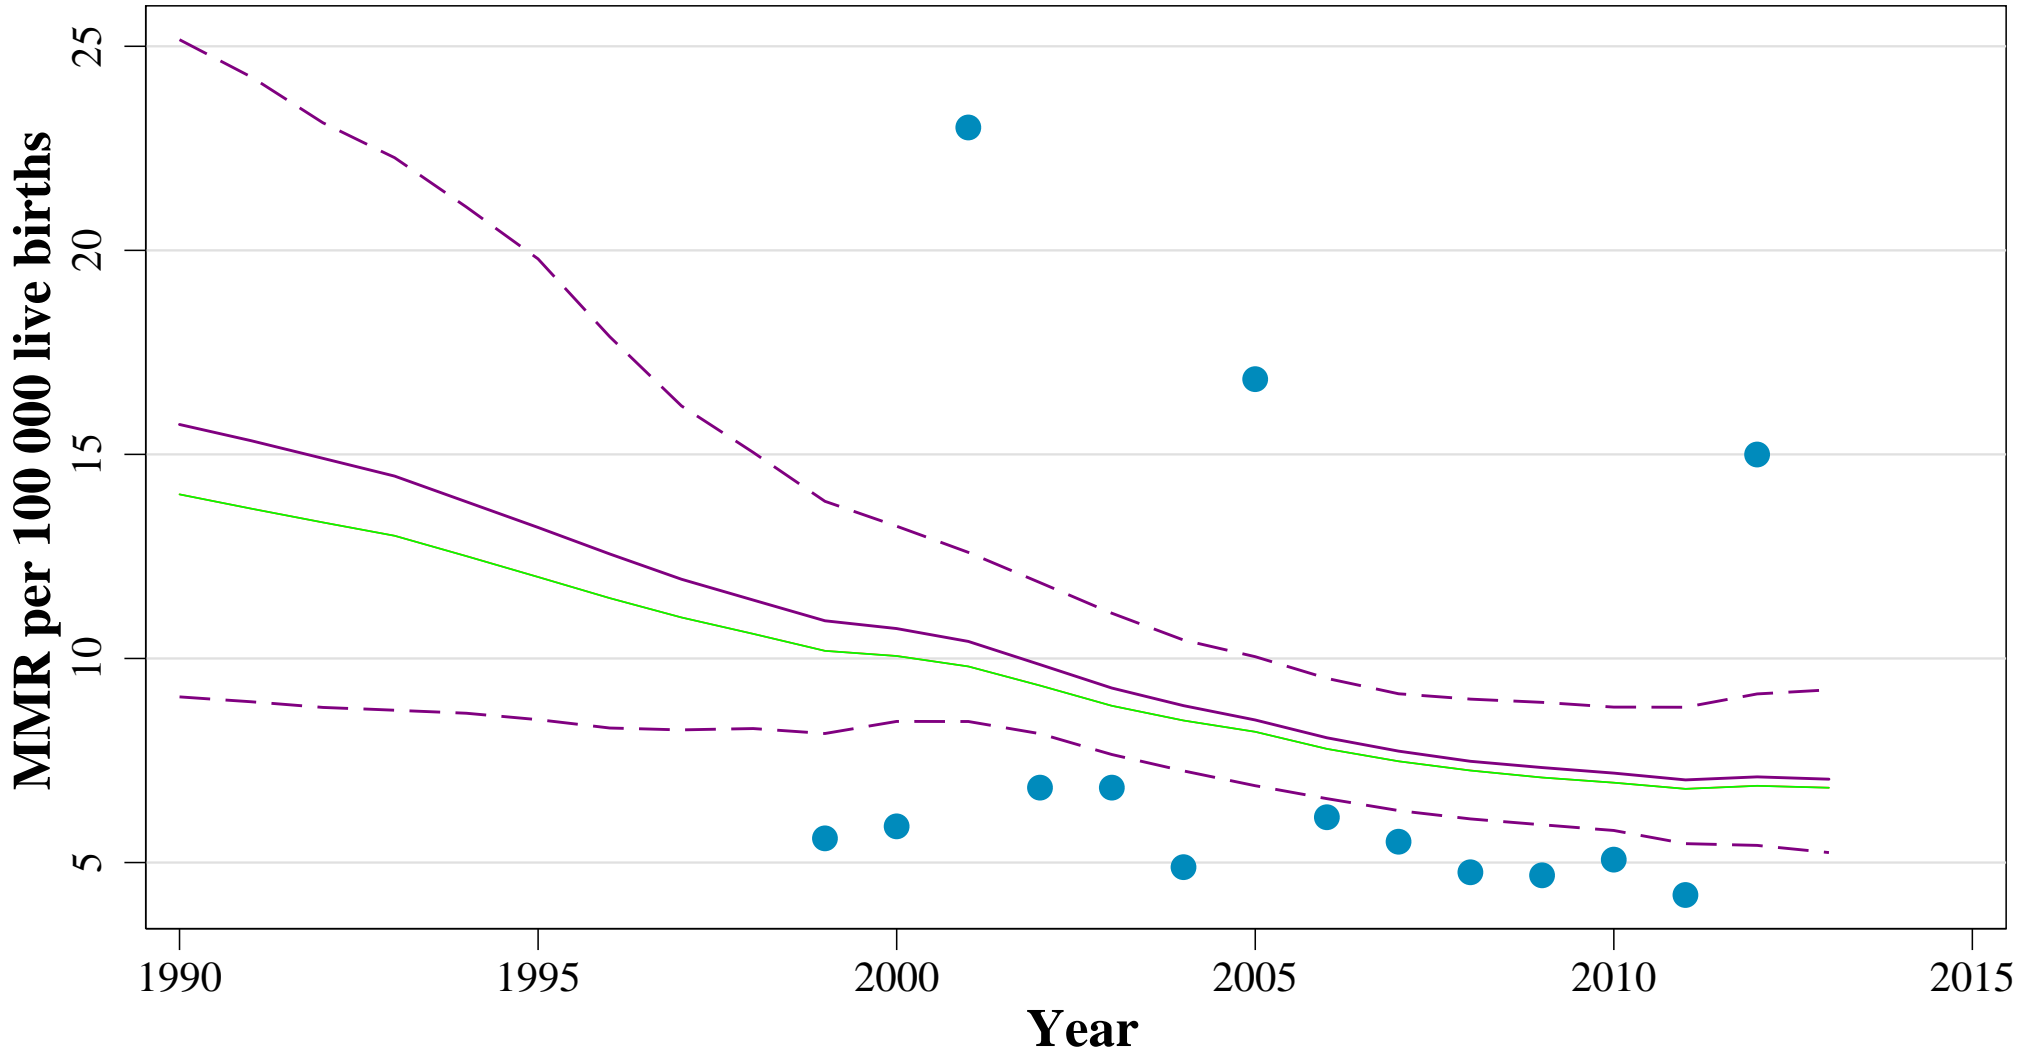

# Senegal

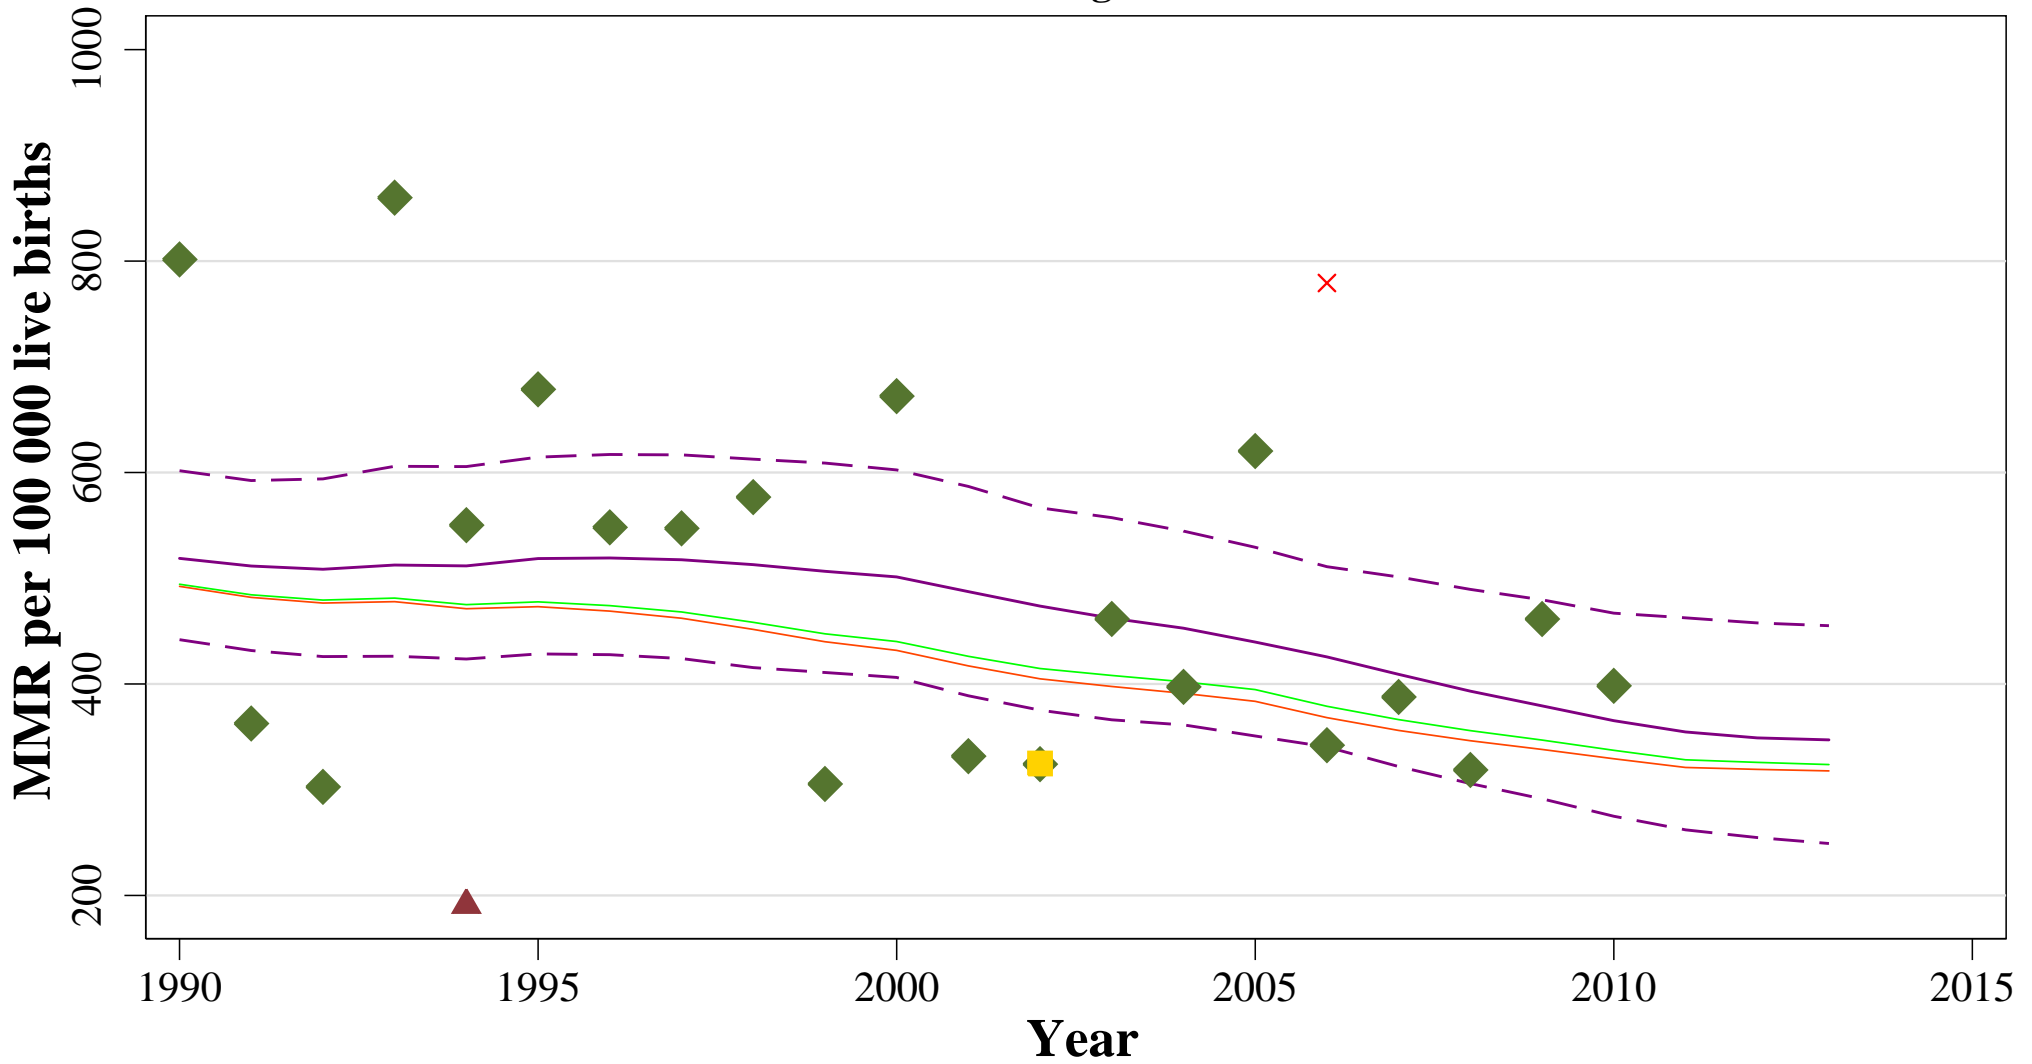

# Serbia

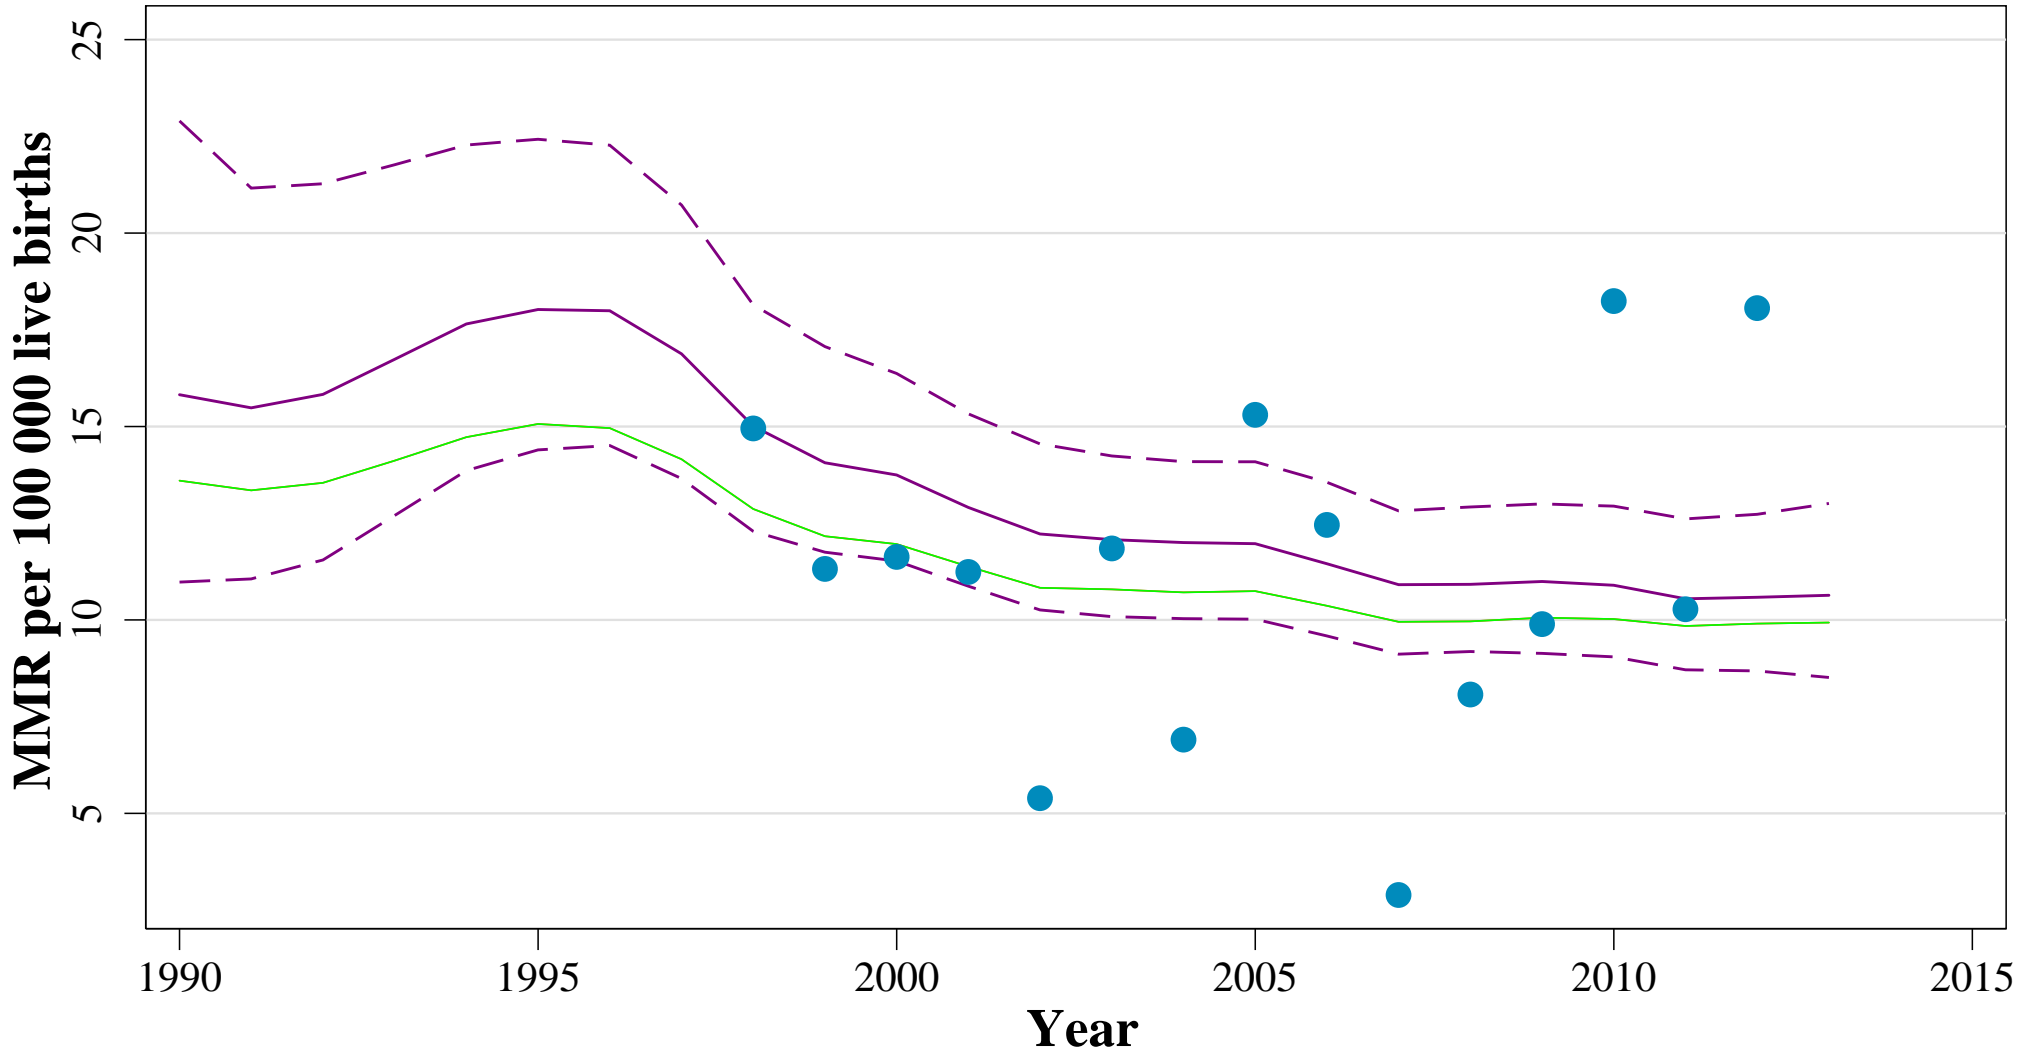

# Seychelles

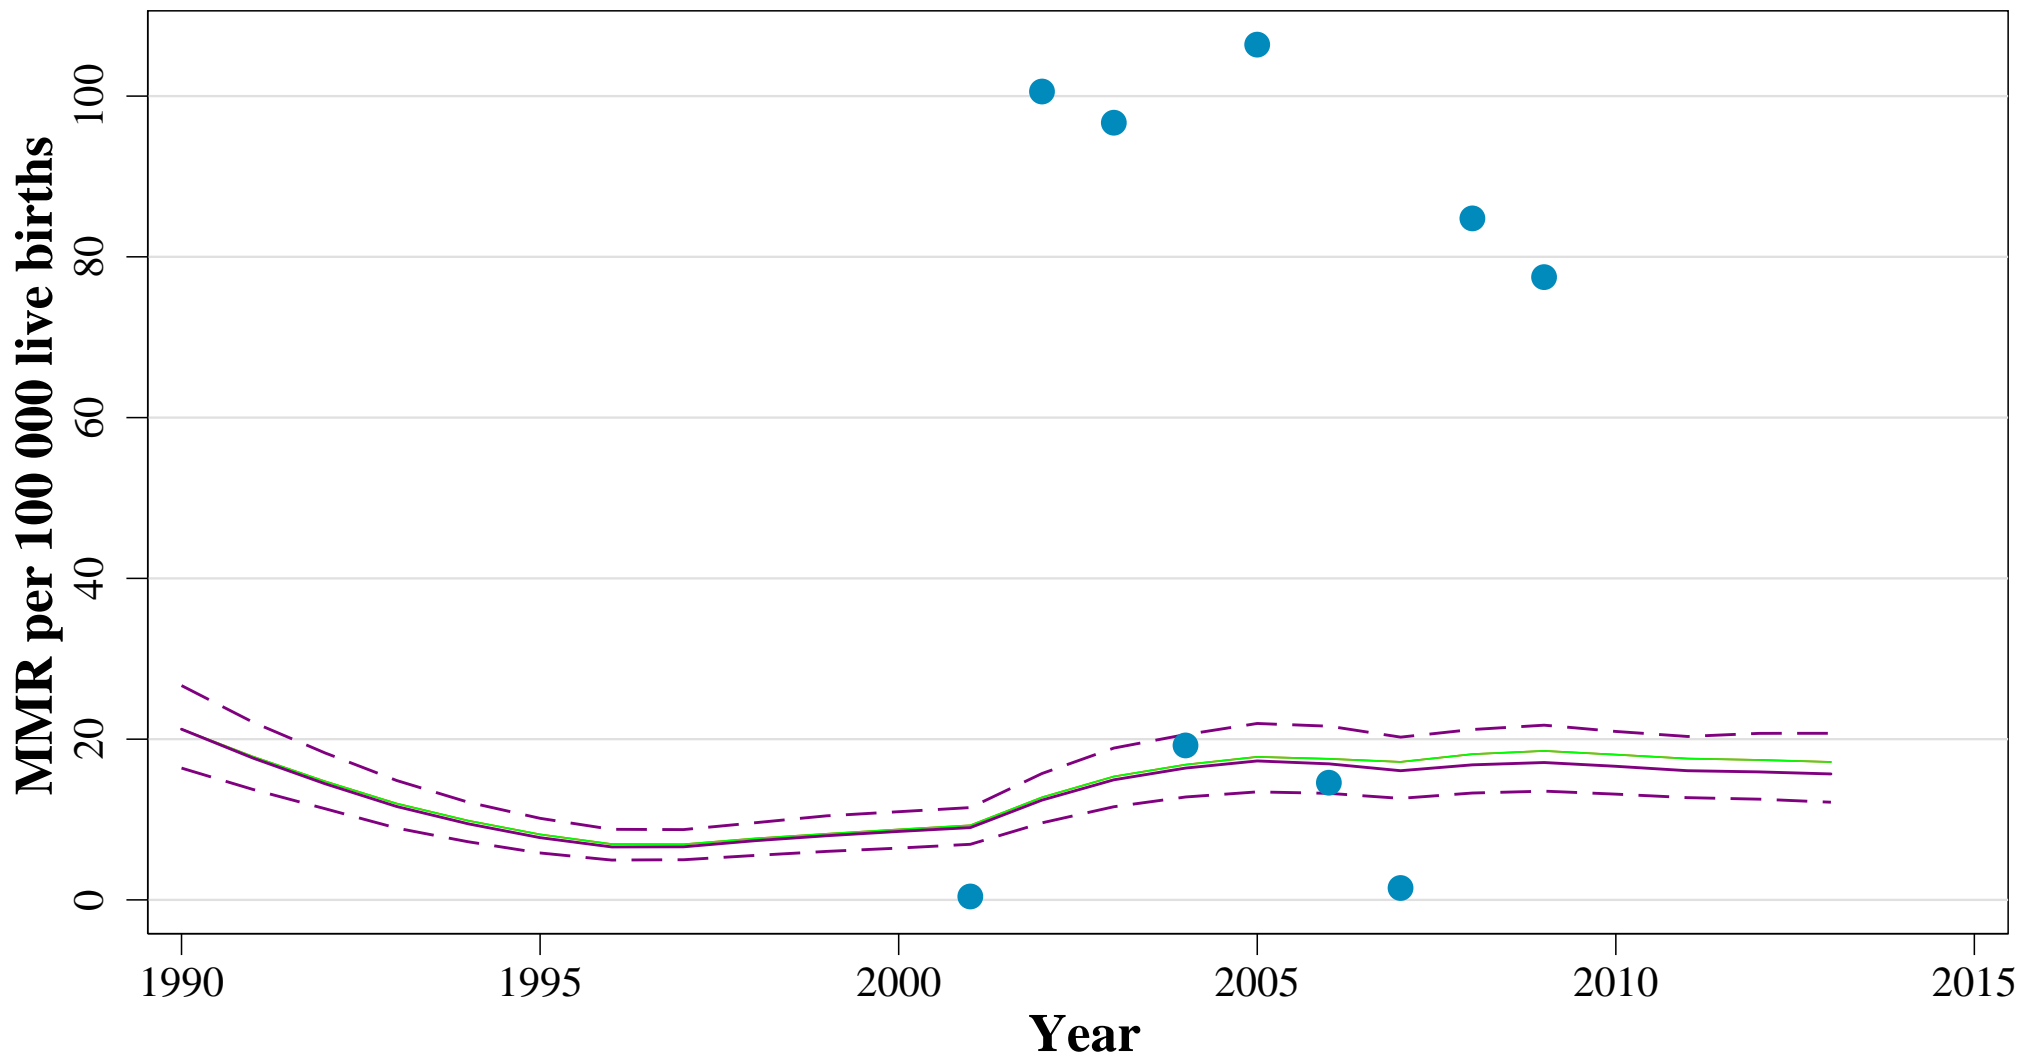



# Sierra Leone

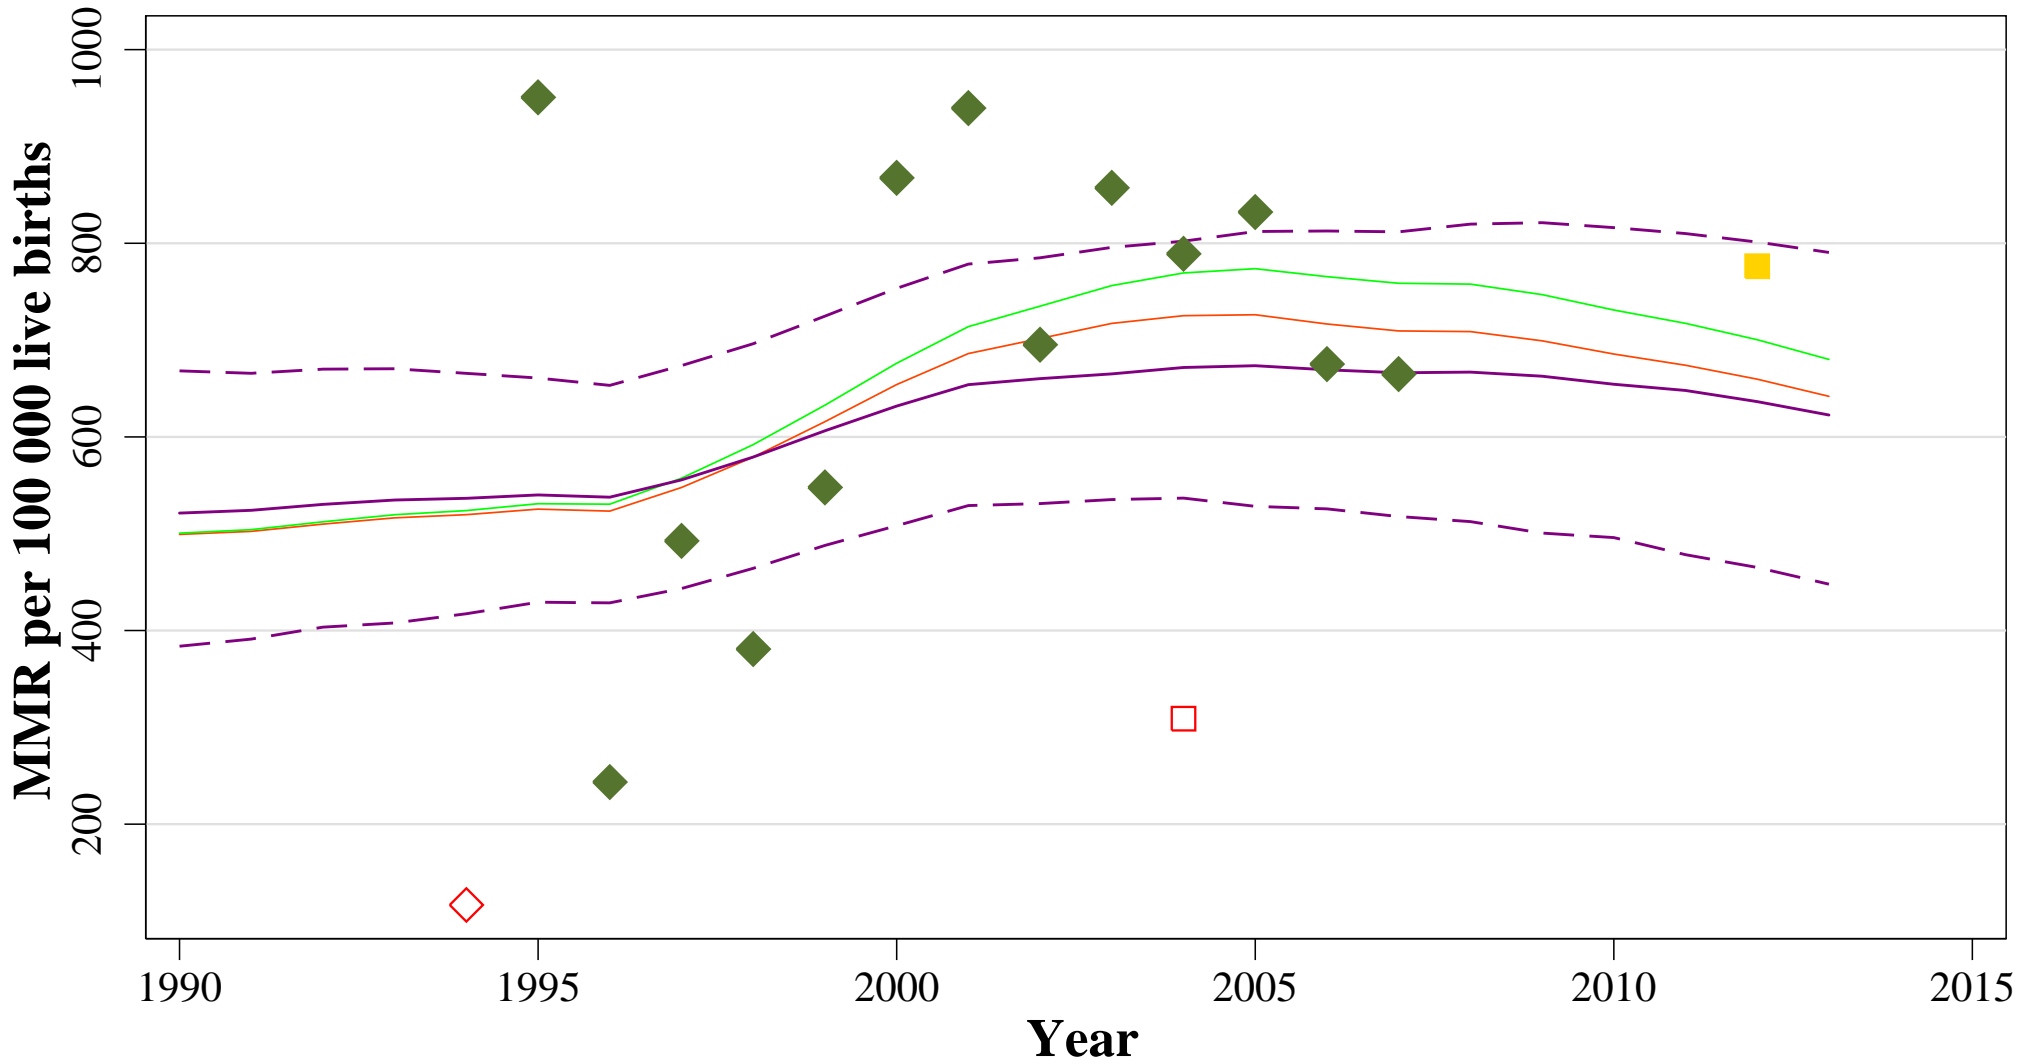

# Singapore

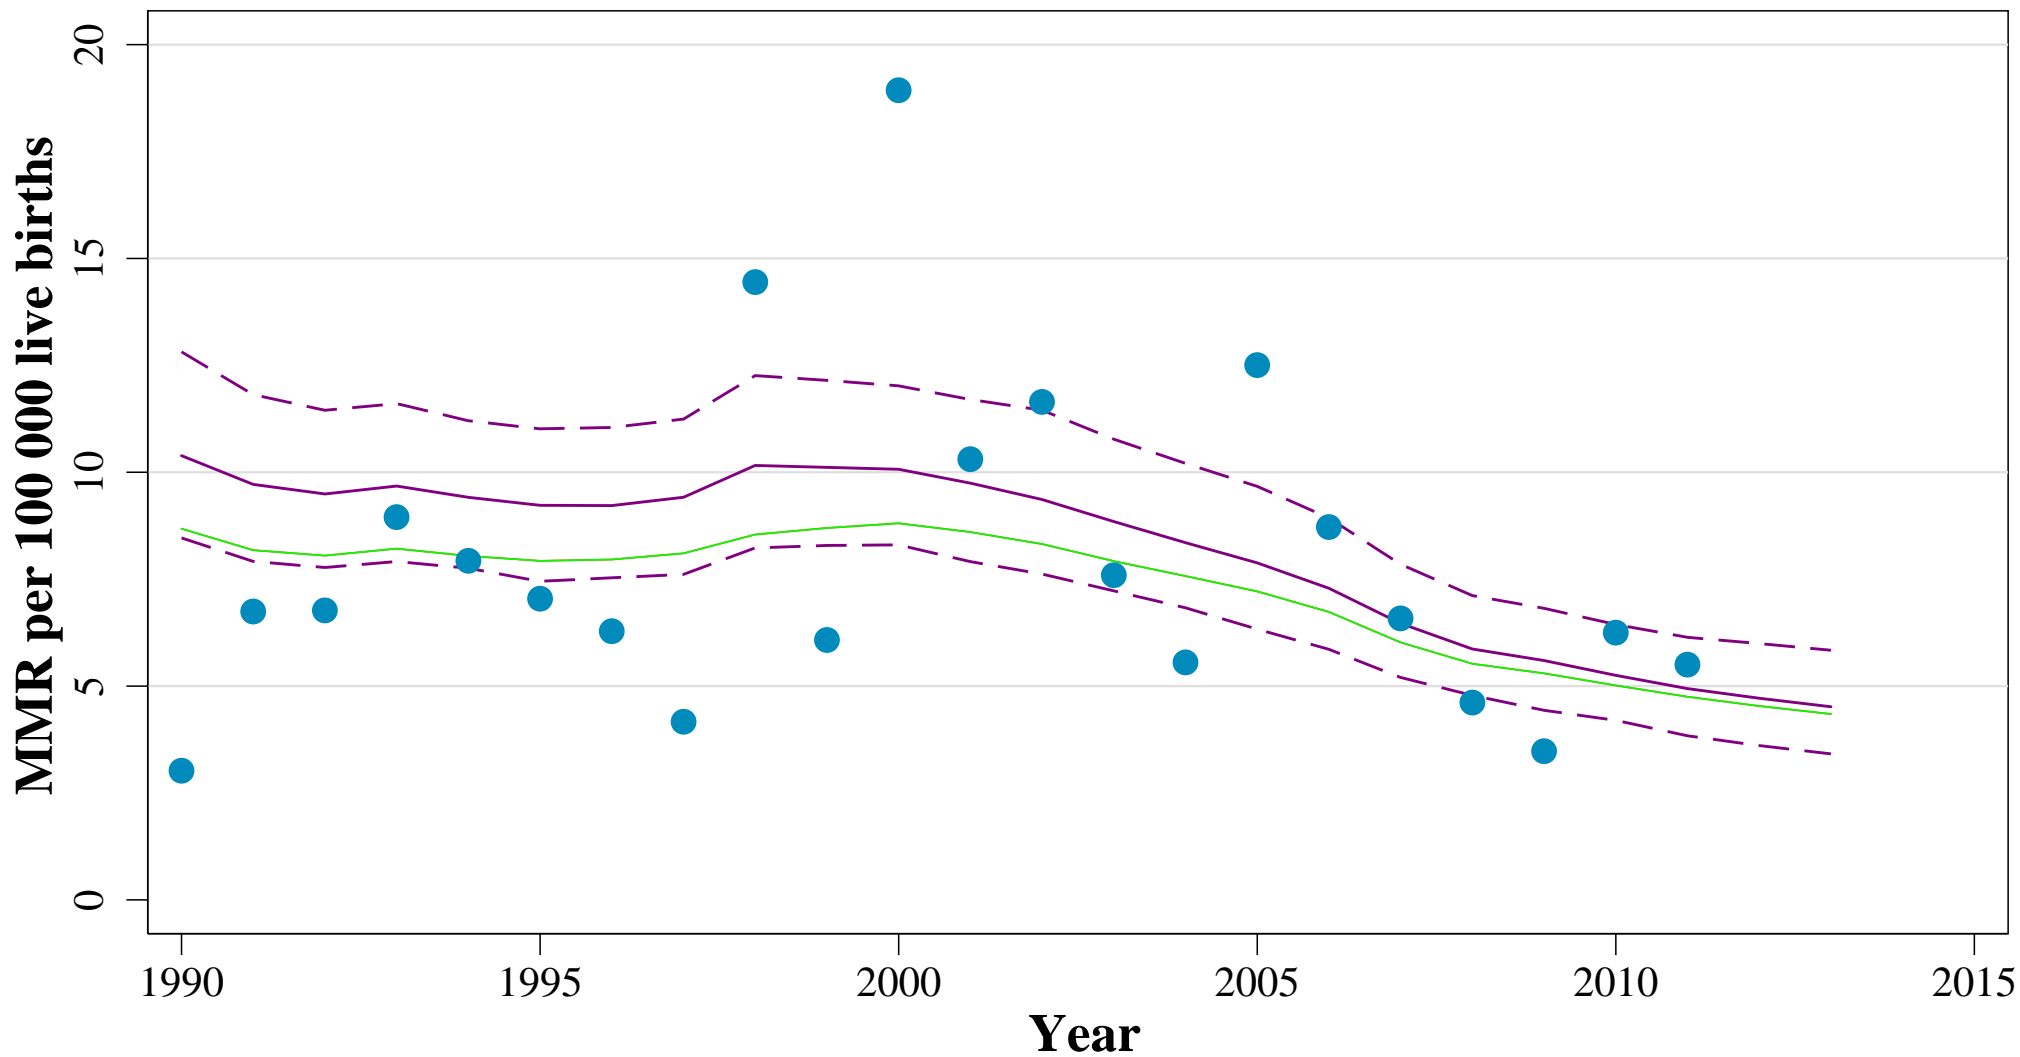

# Slovakia

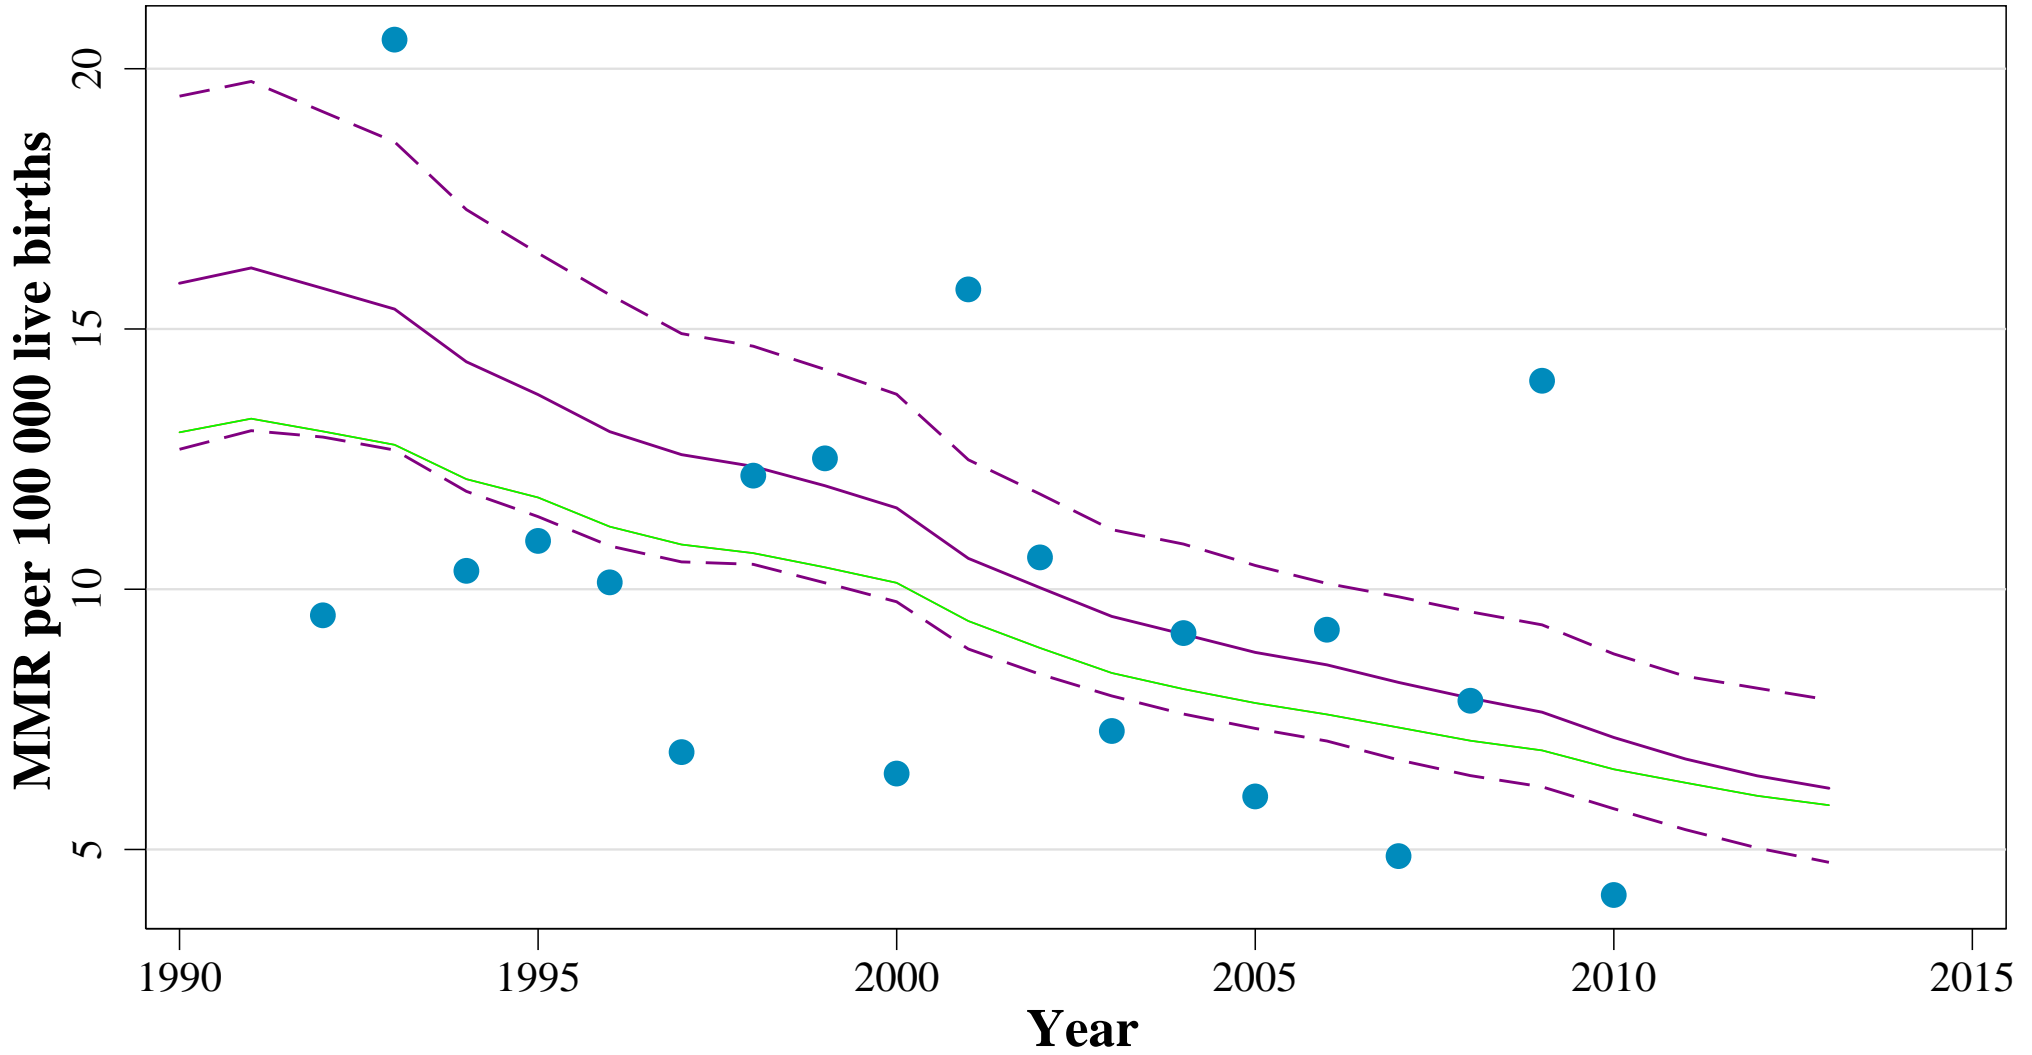

# Slovenia

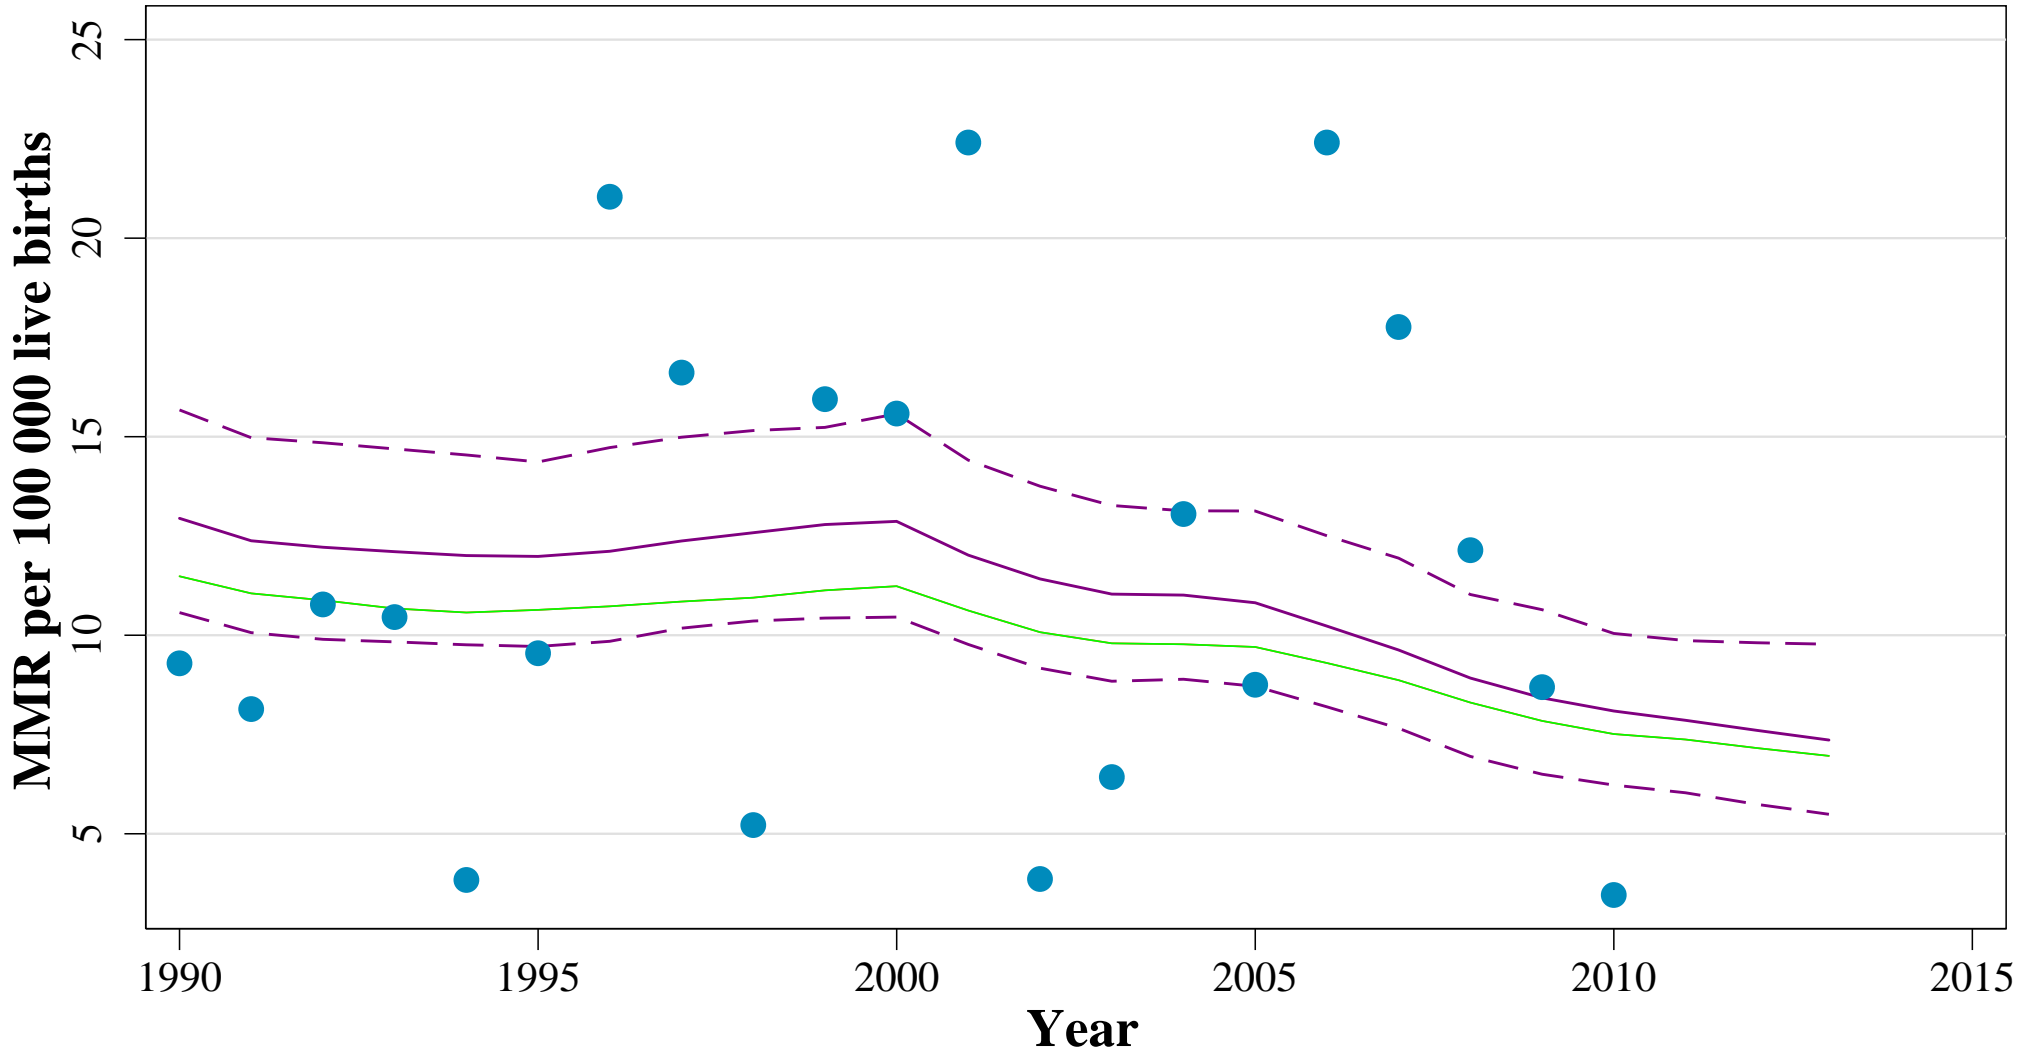

# Solomon Islands

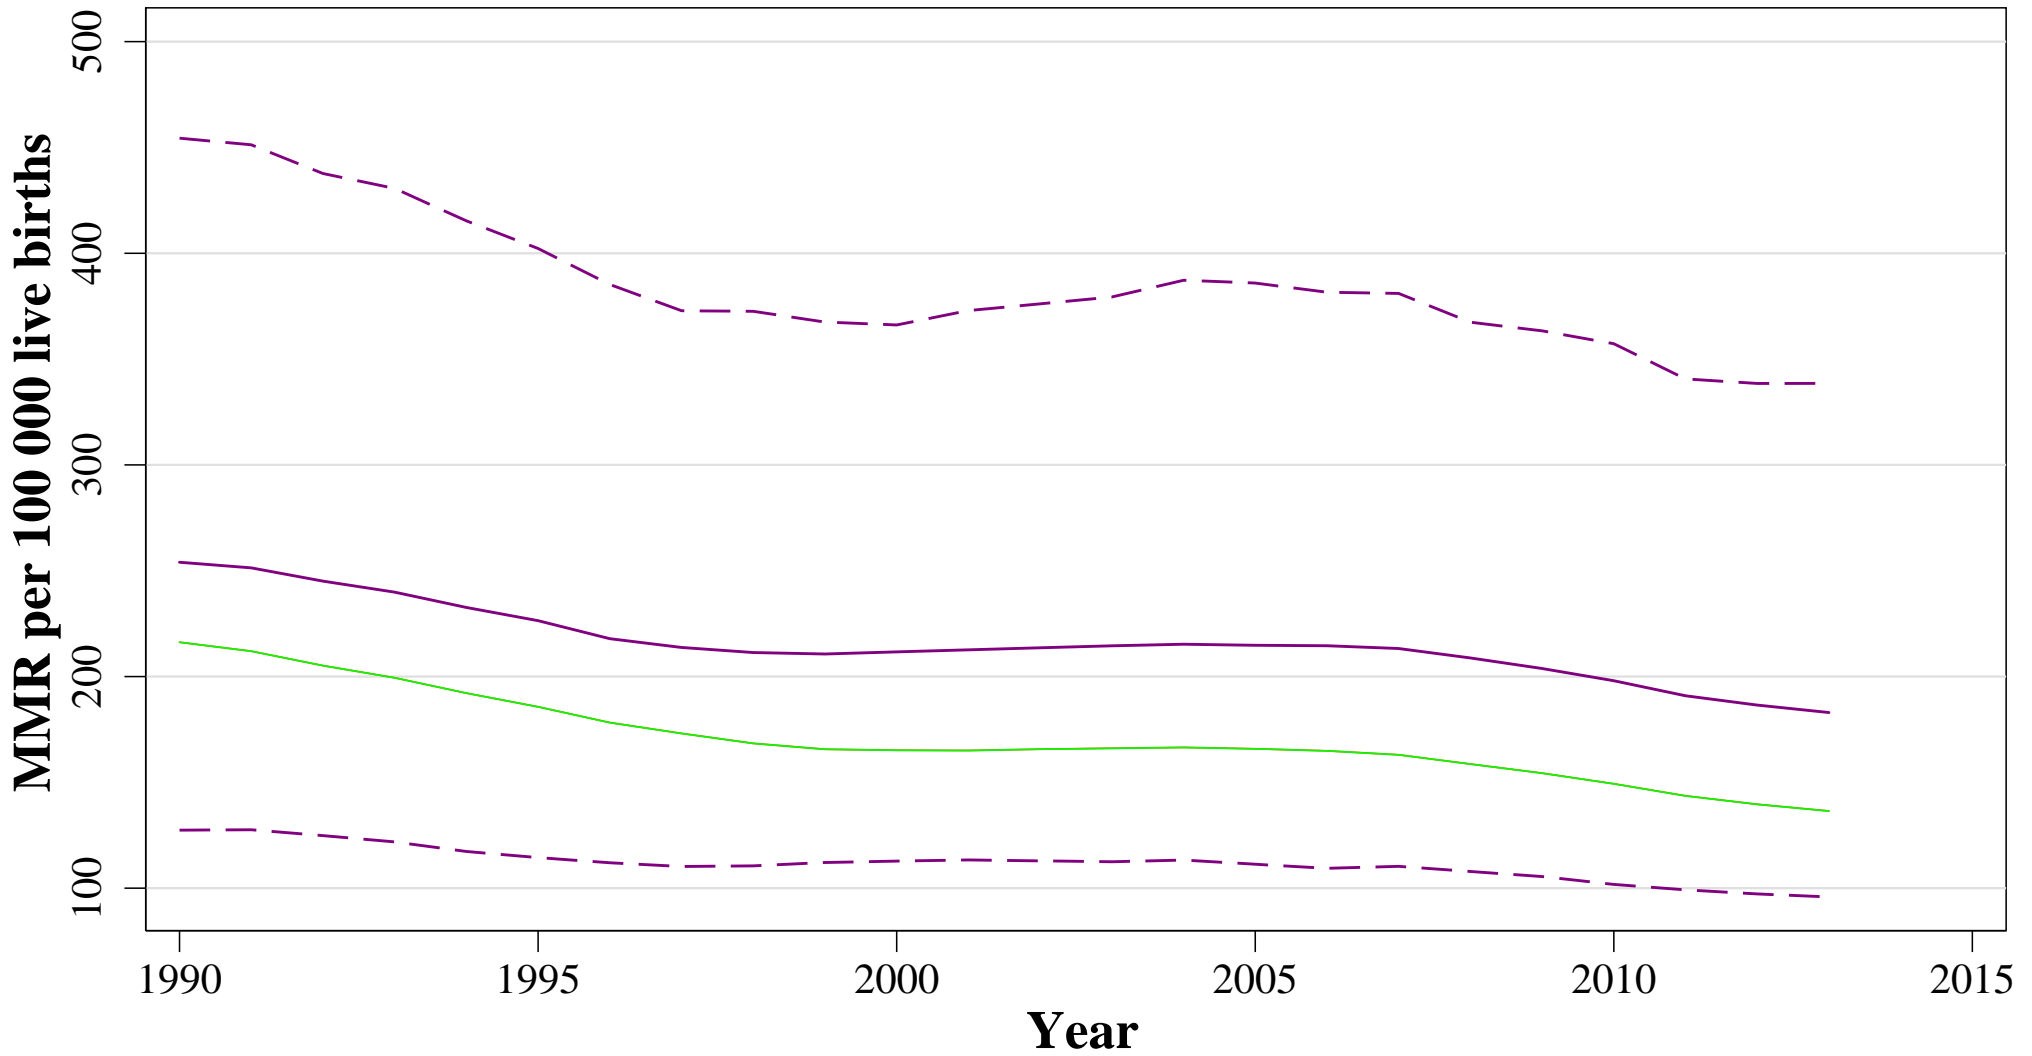

# Somalia

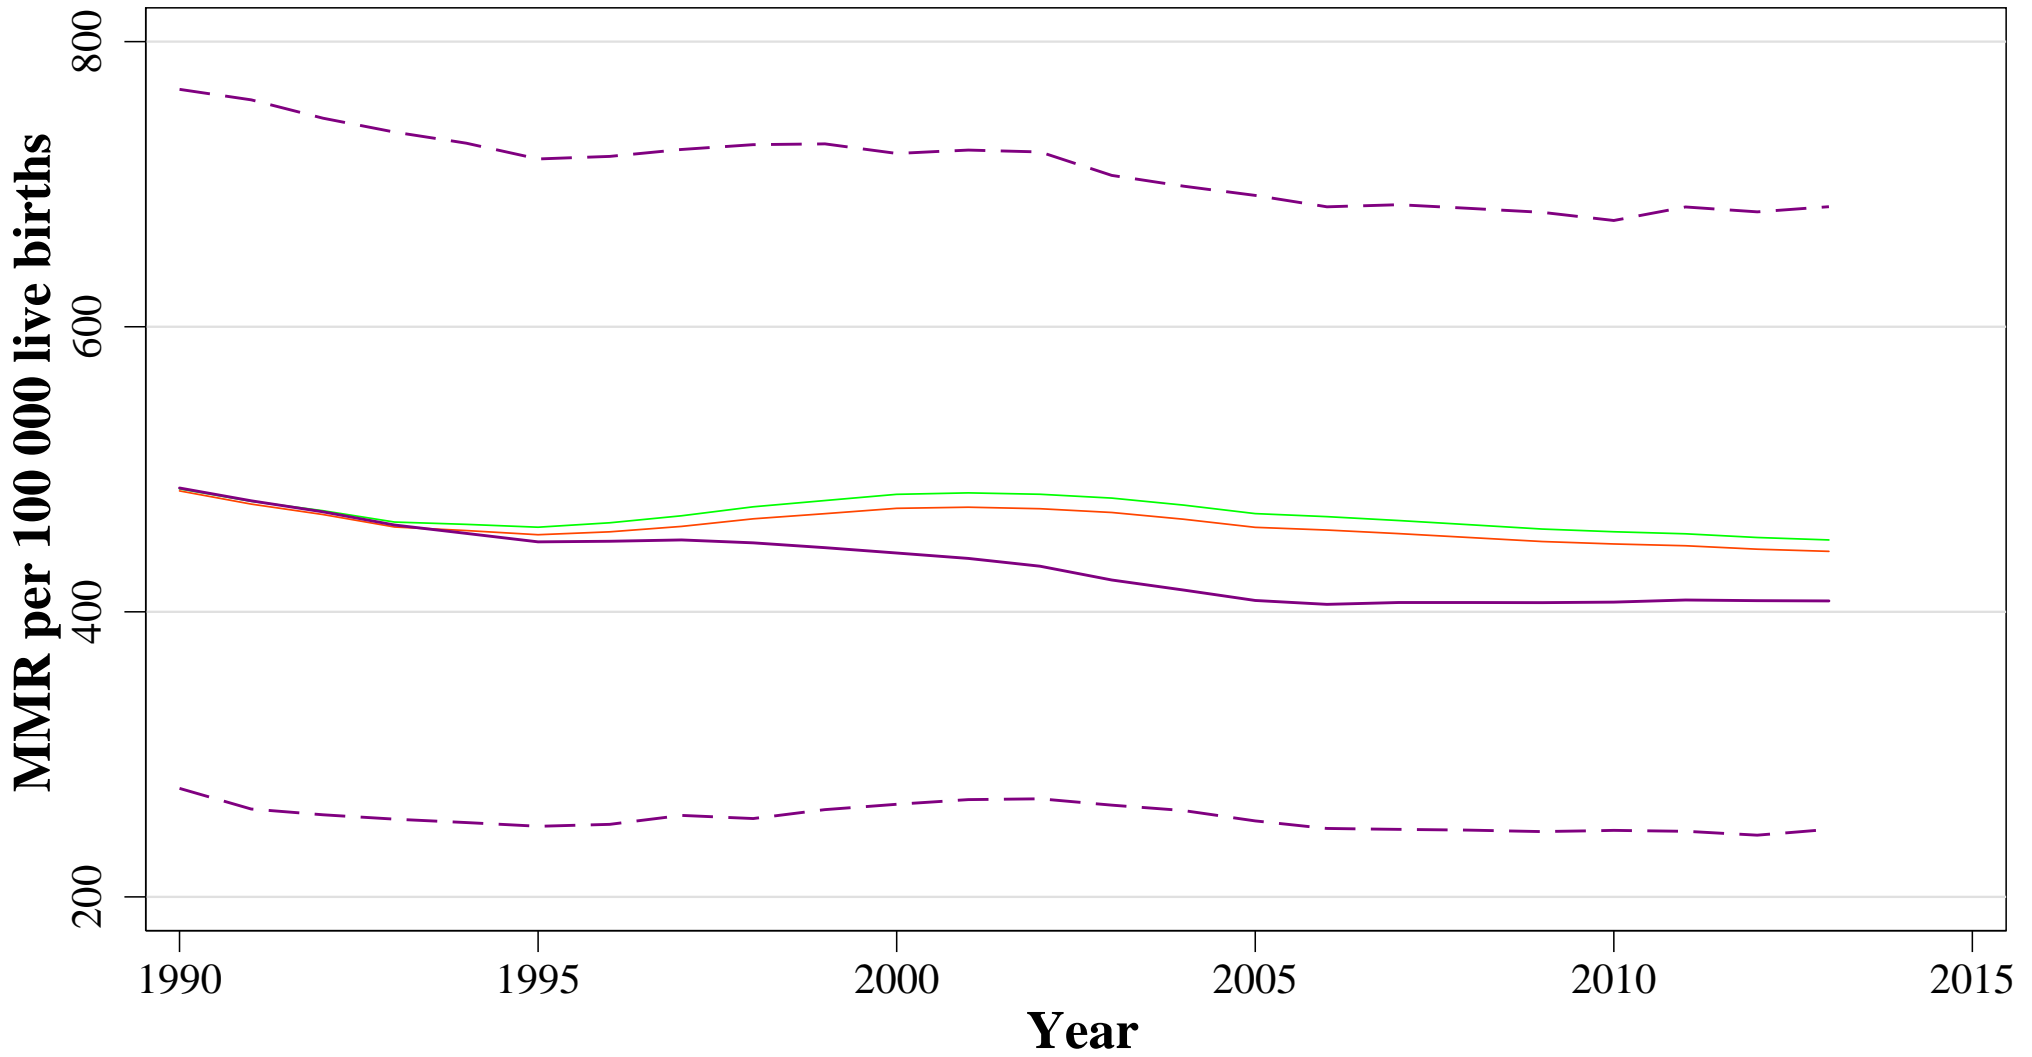

# South Africa

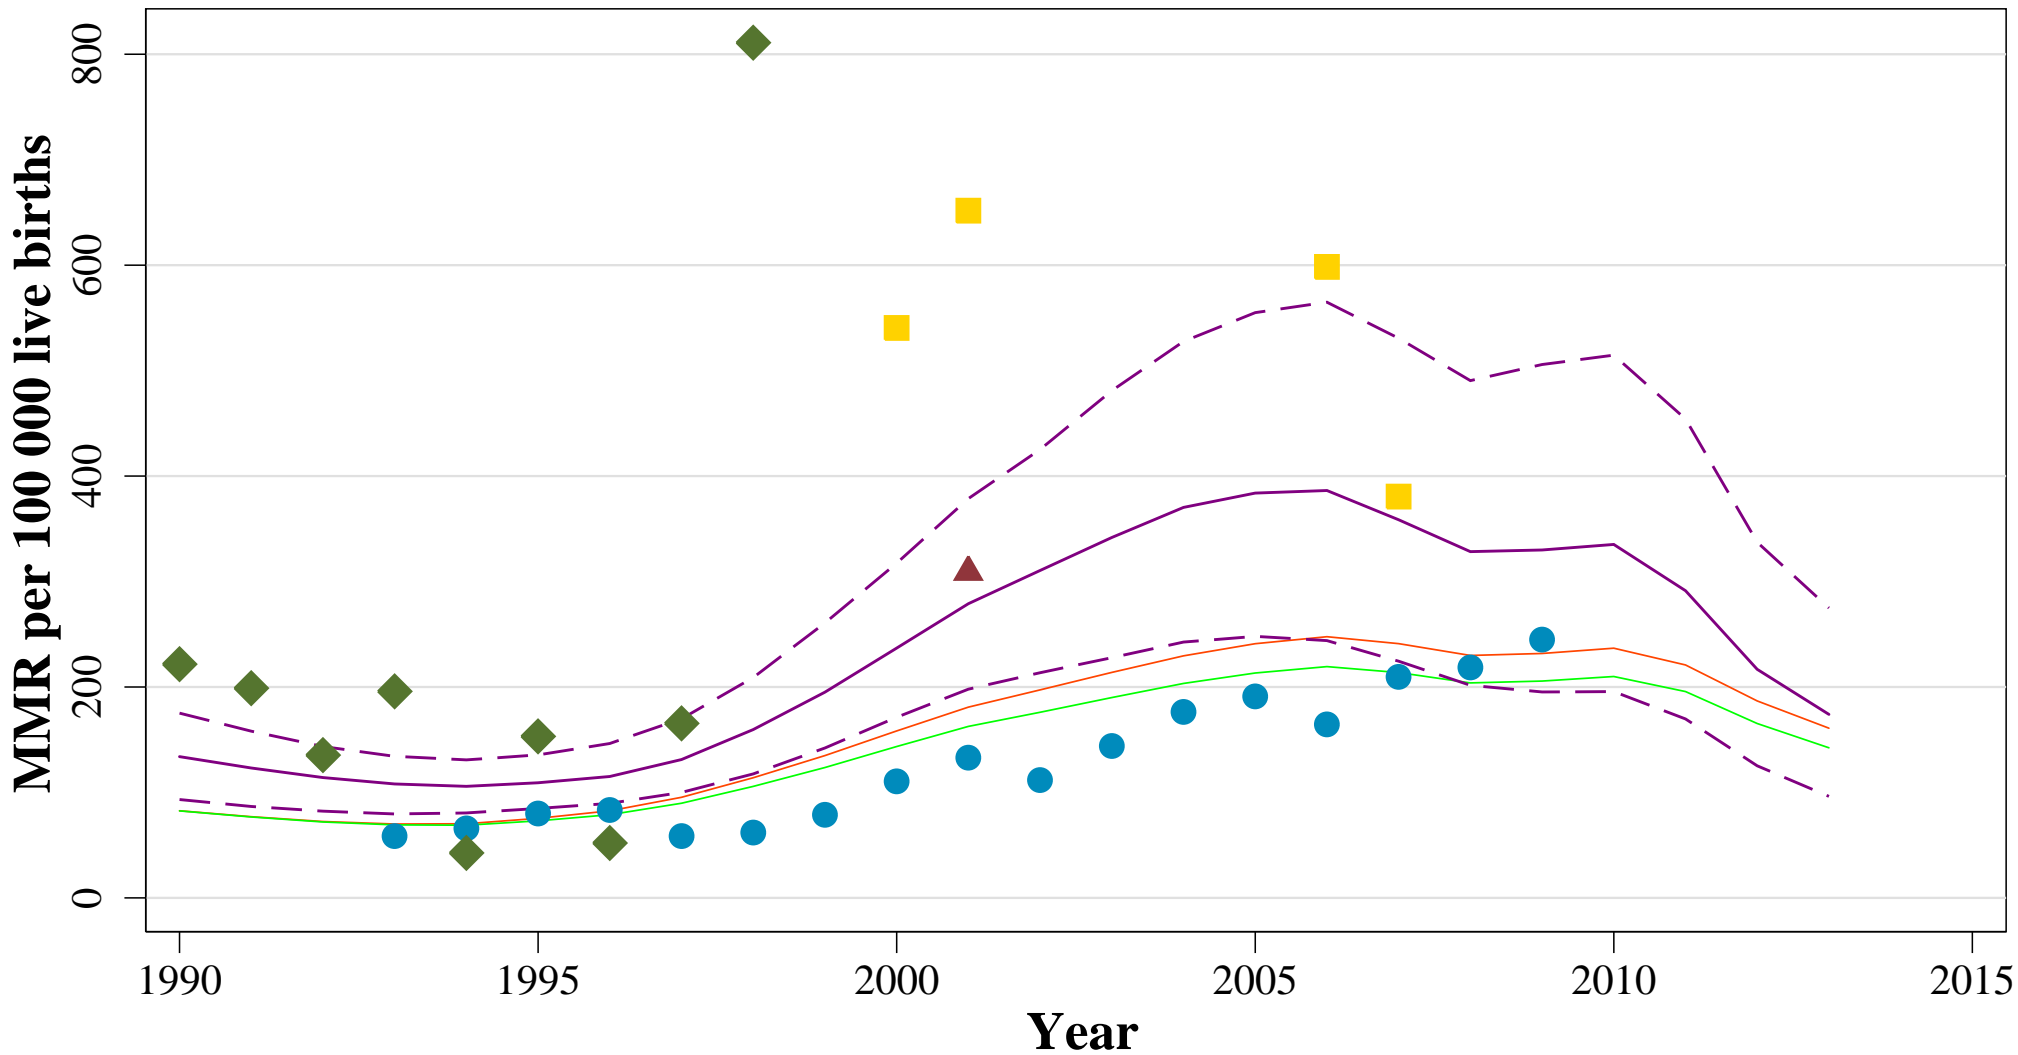

# South Korea

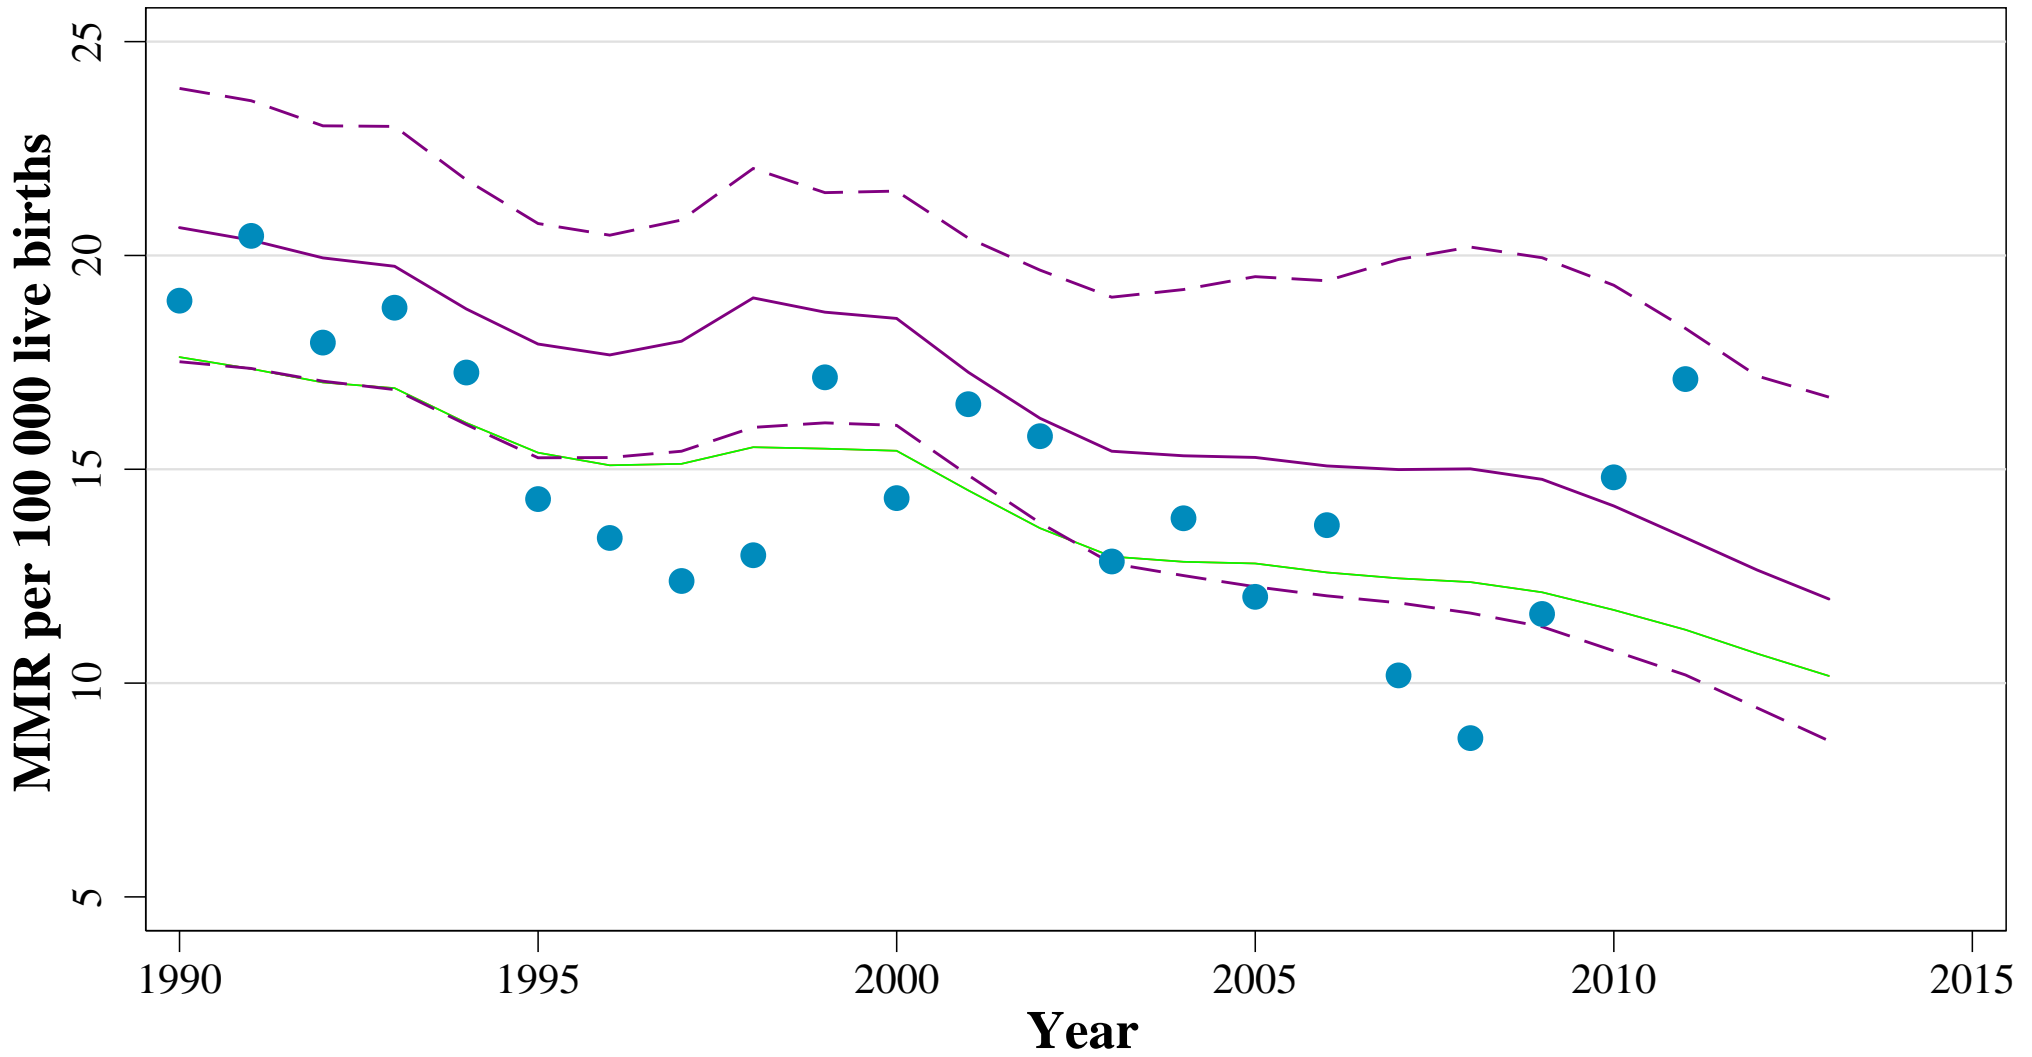



# South Sudan

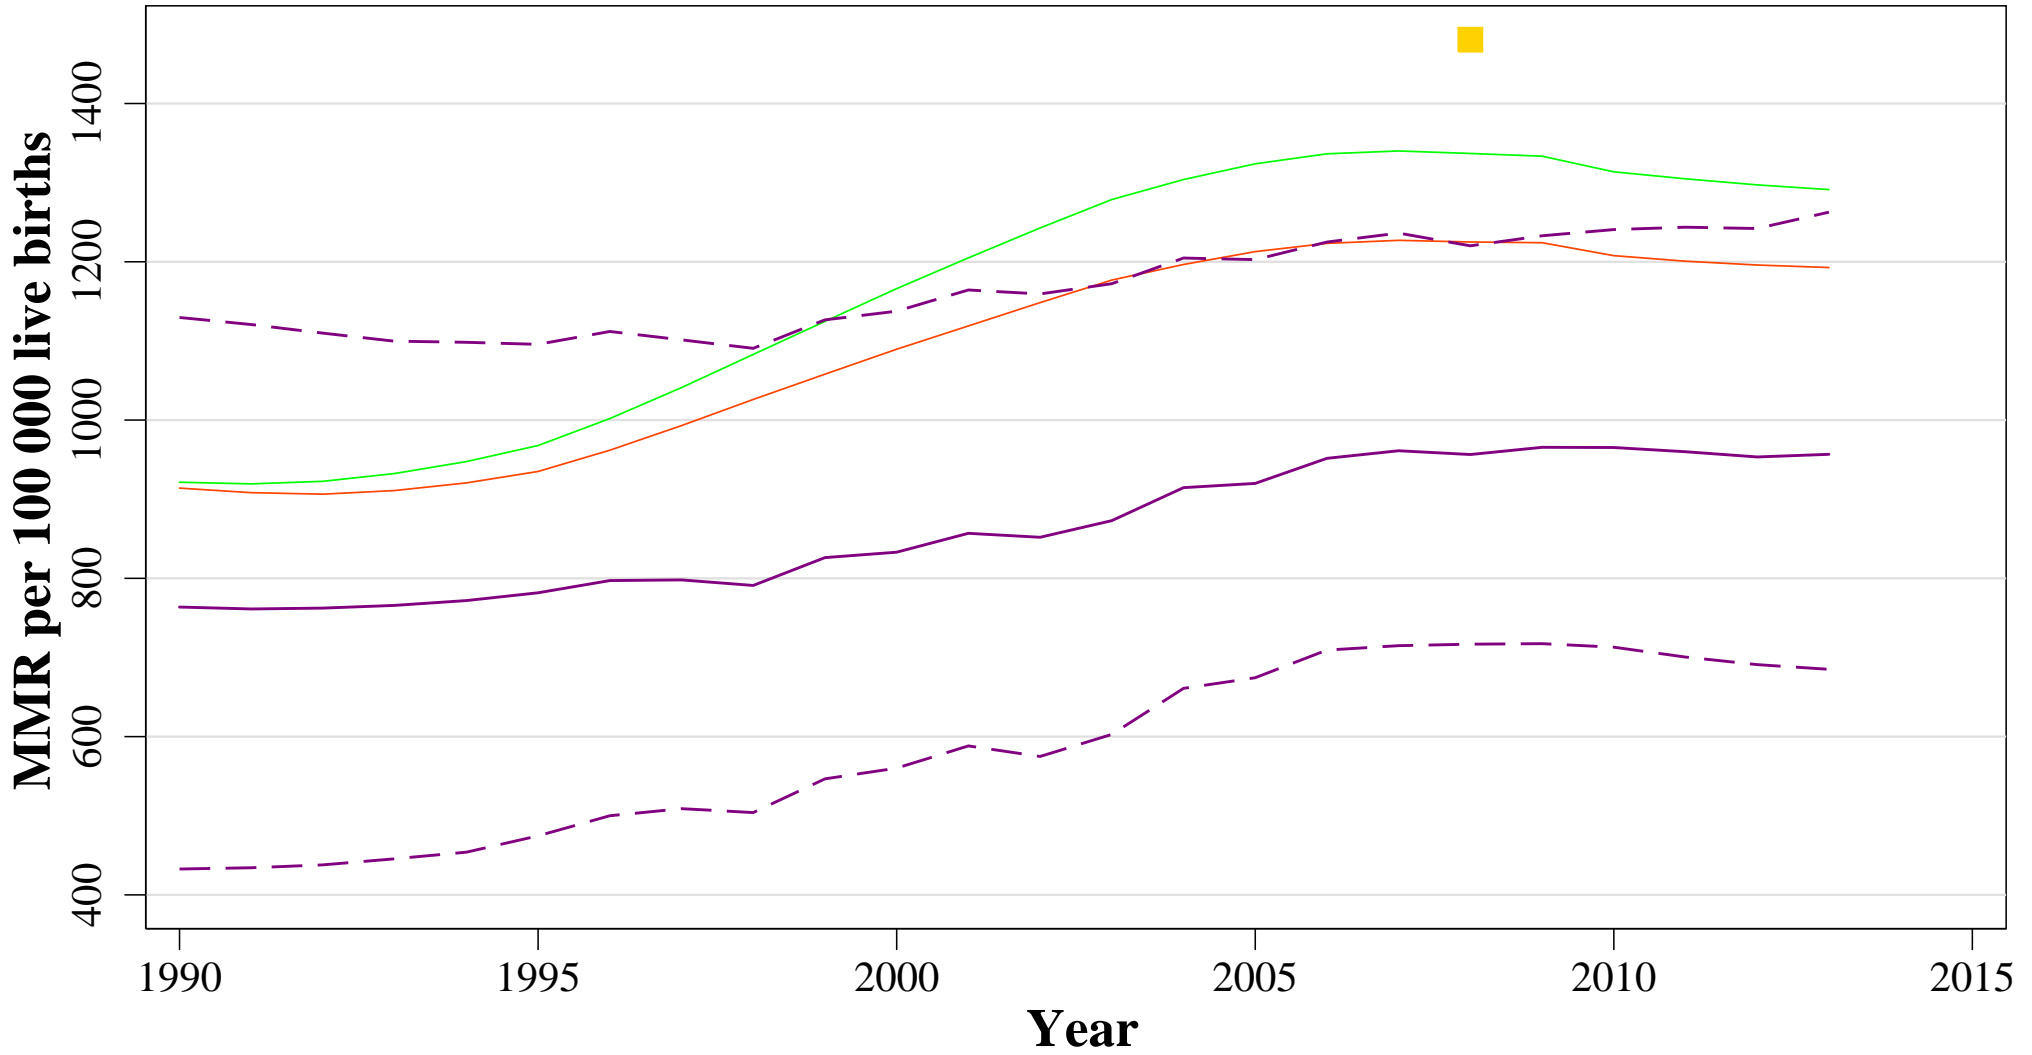

# Spain

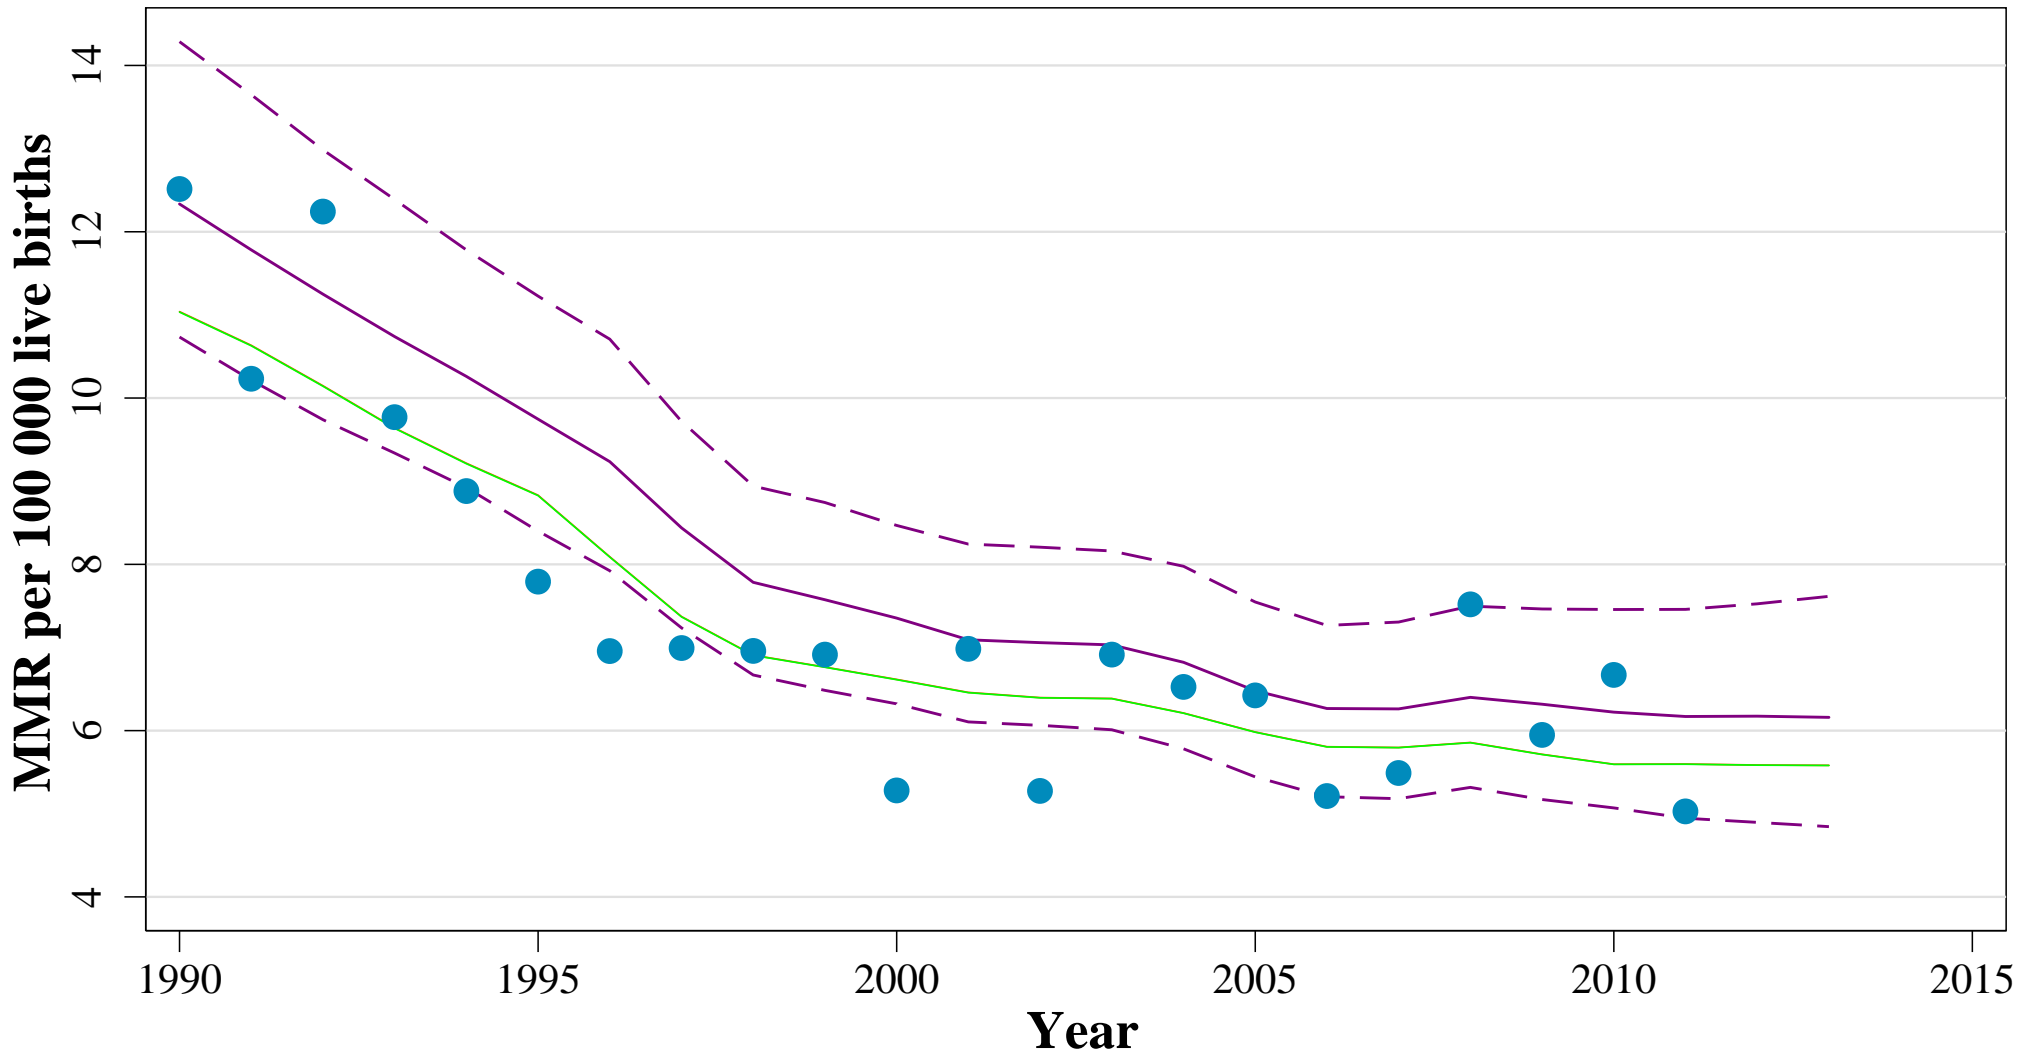

# Sri Lanka

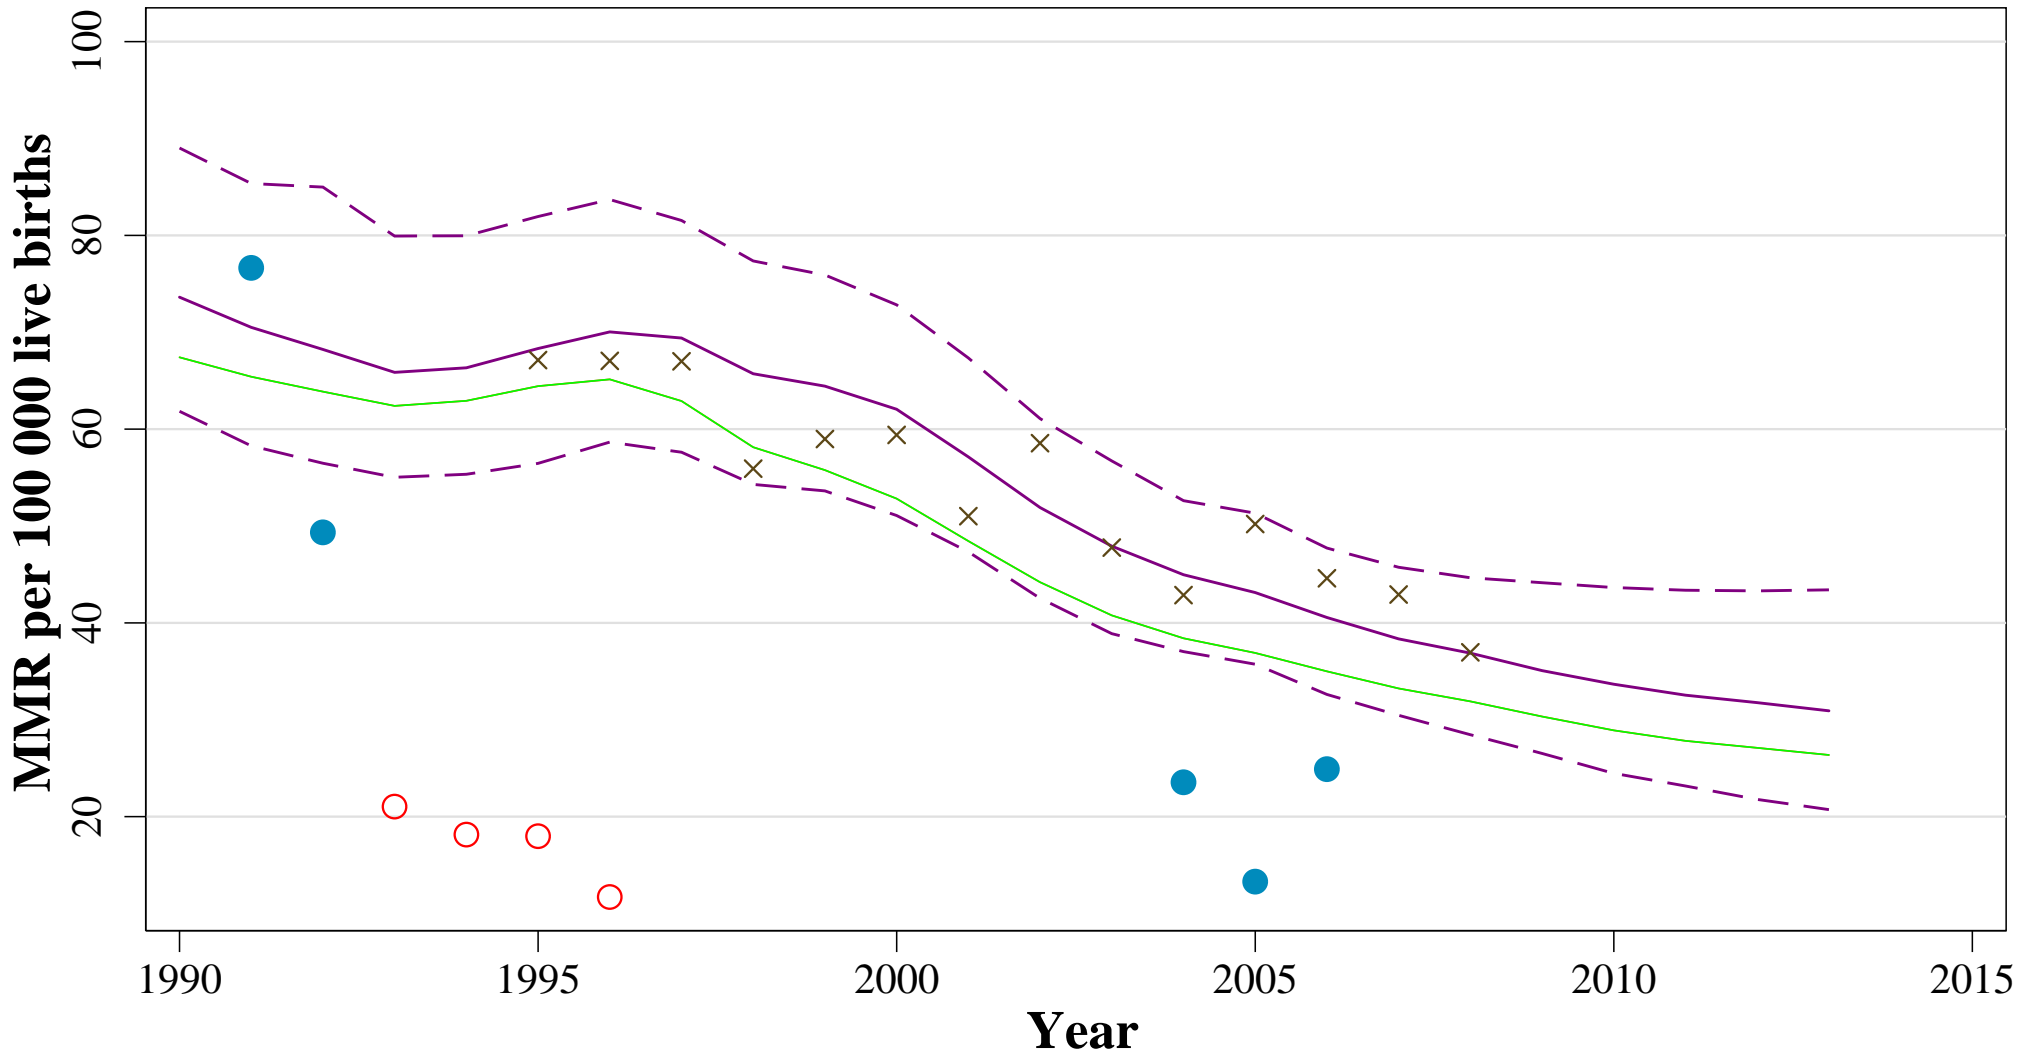

# Sudan

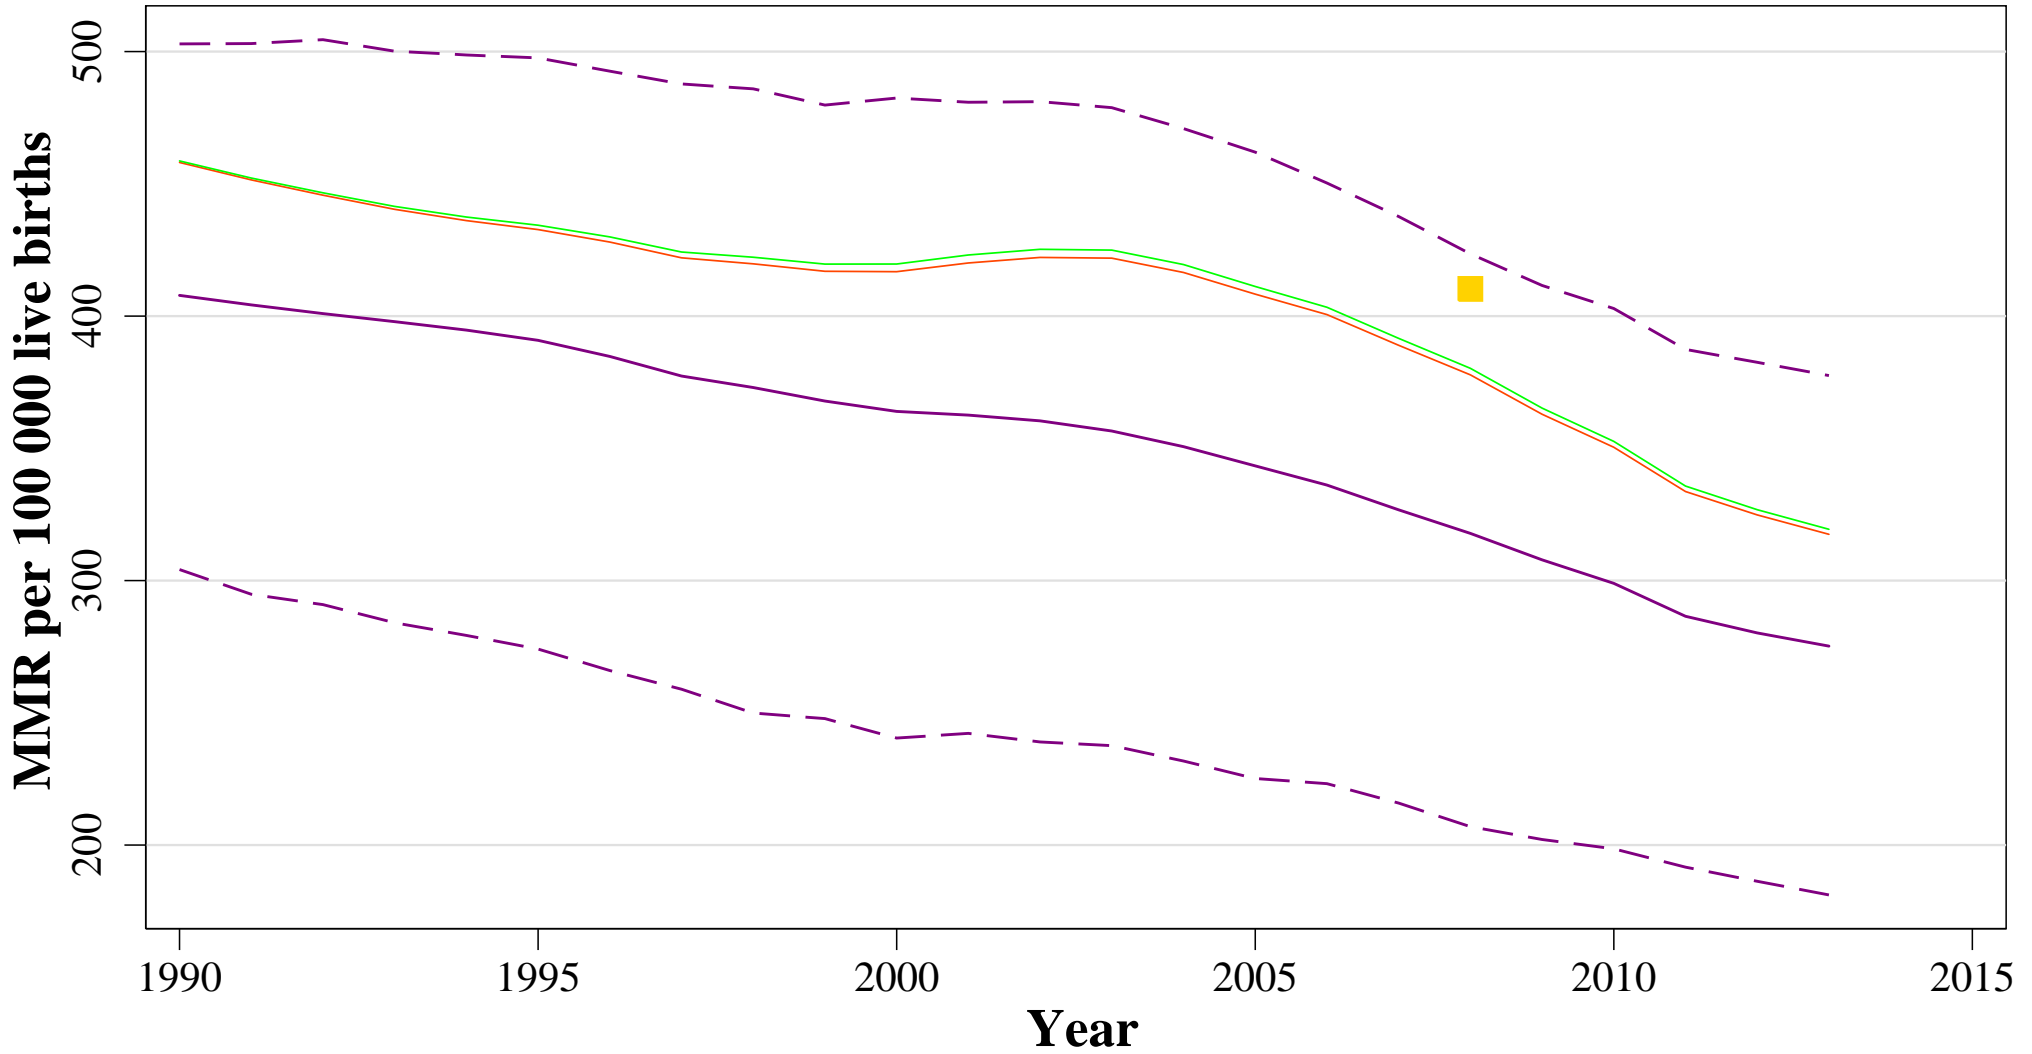

# Suriname

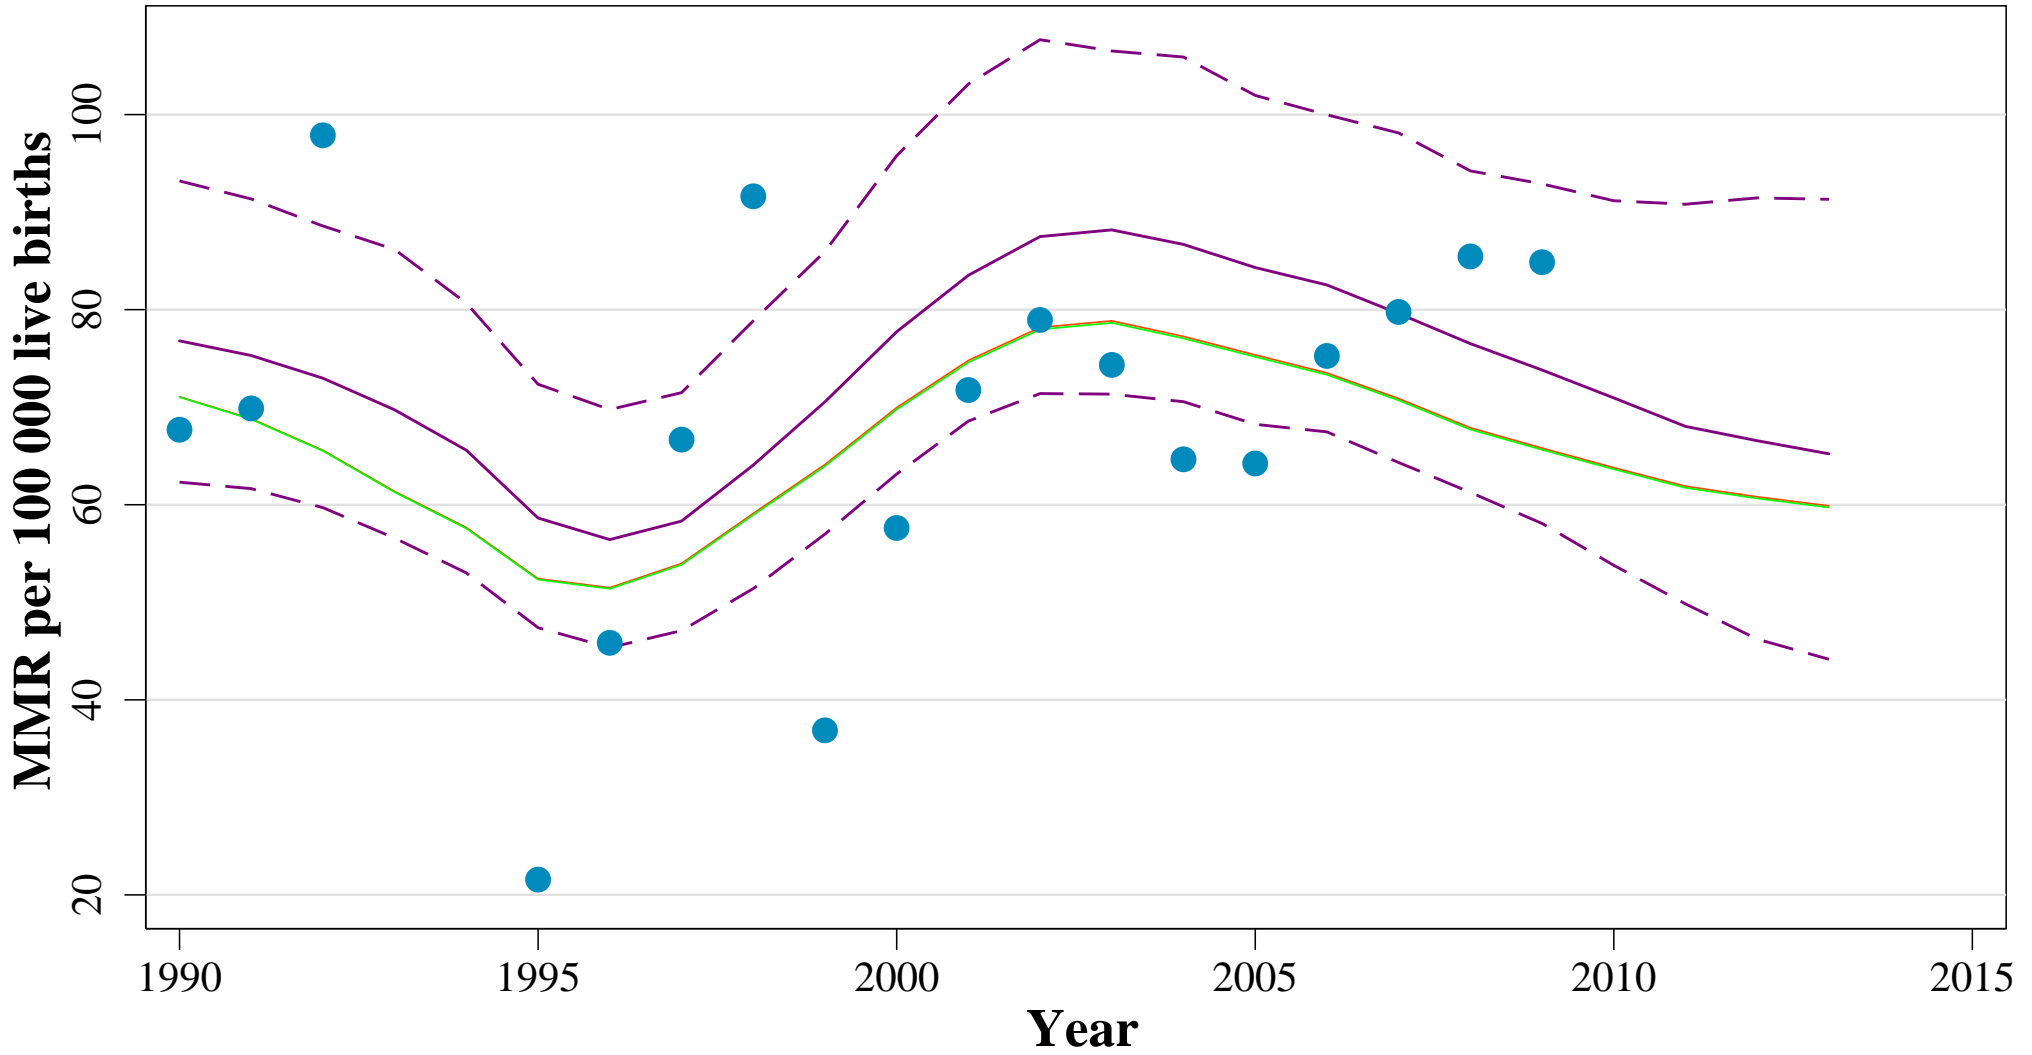

# Swaziland

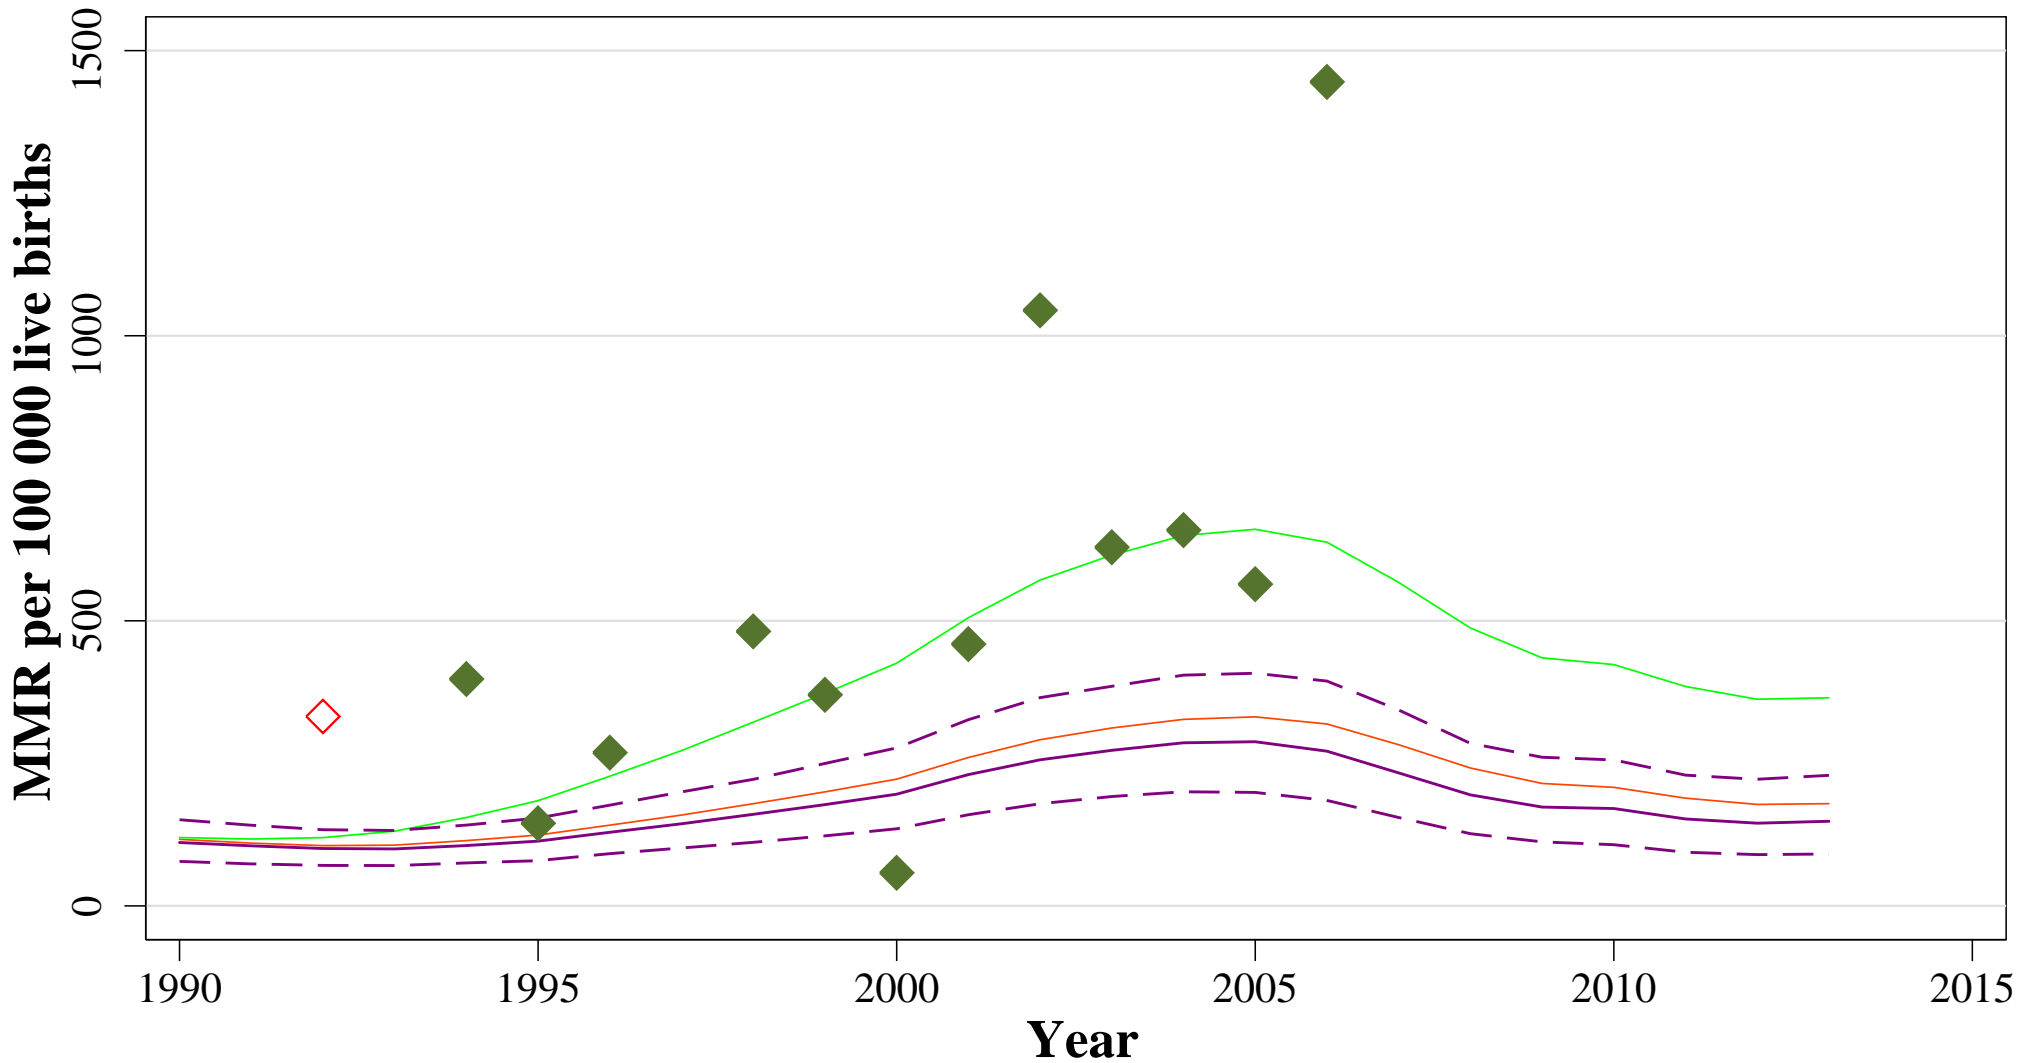

# Sweden

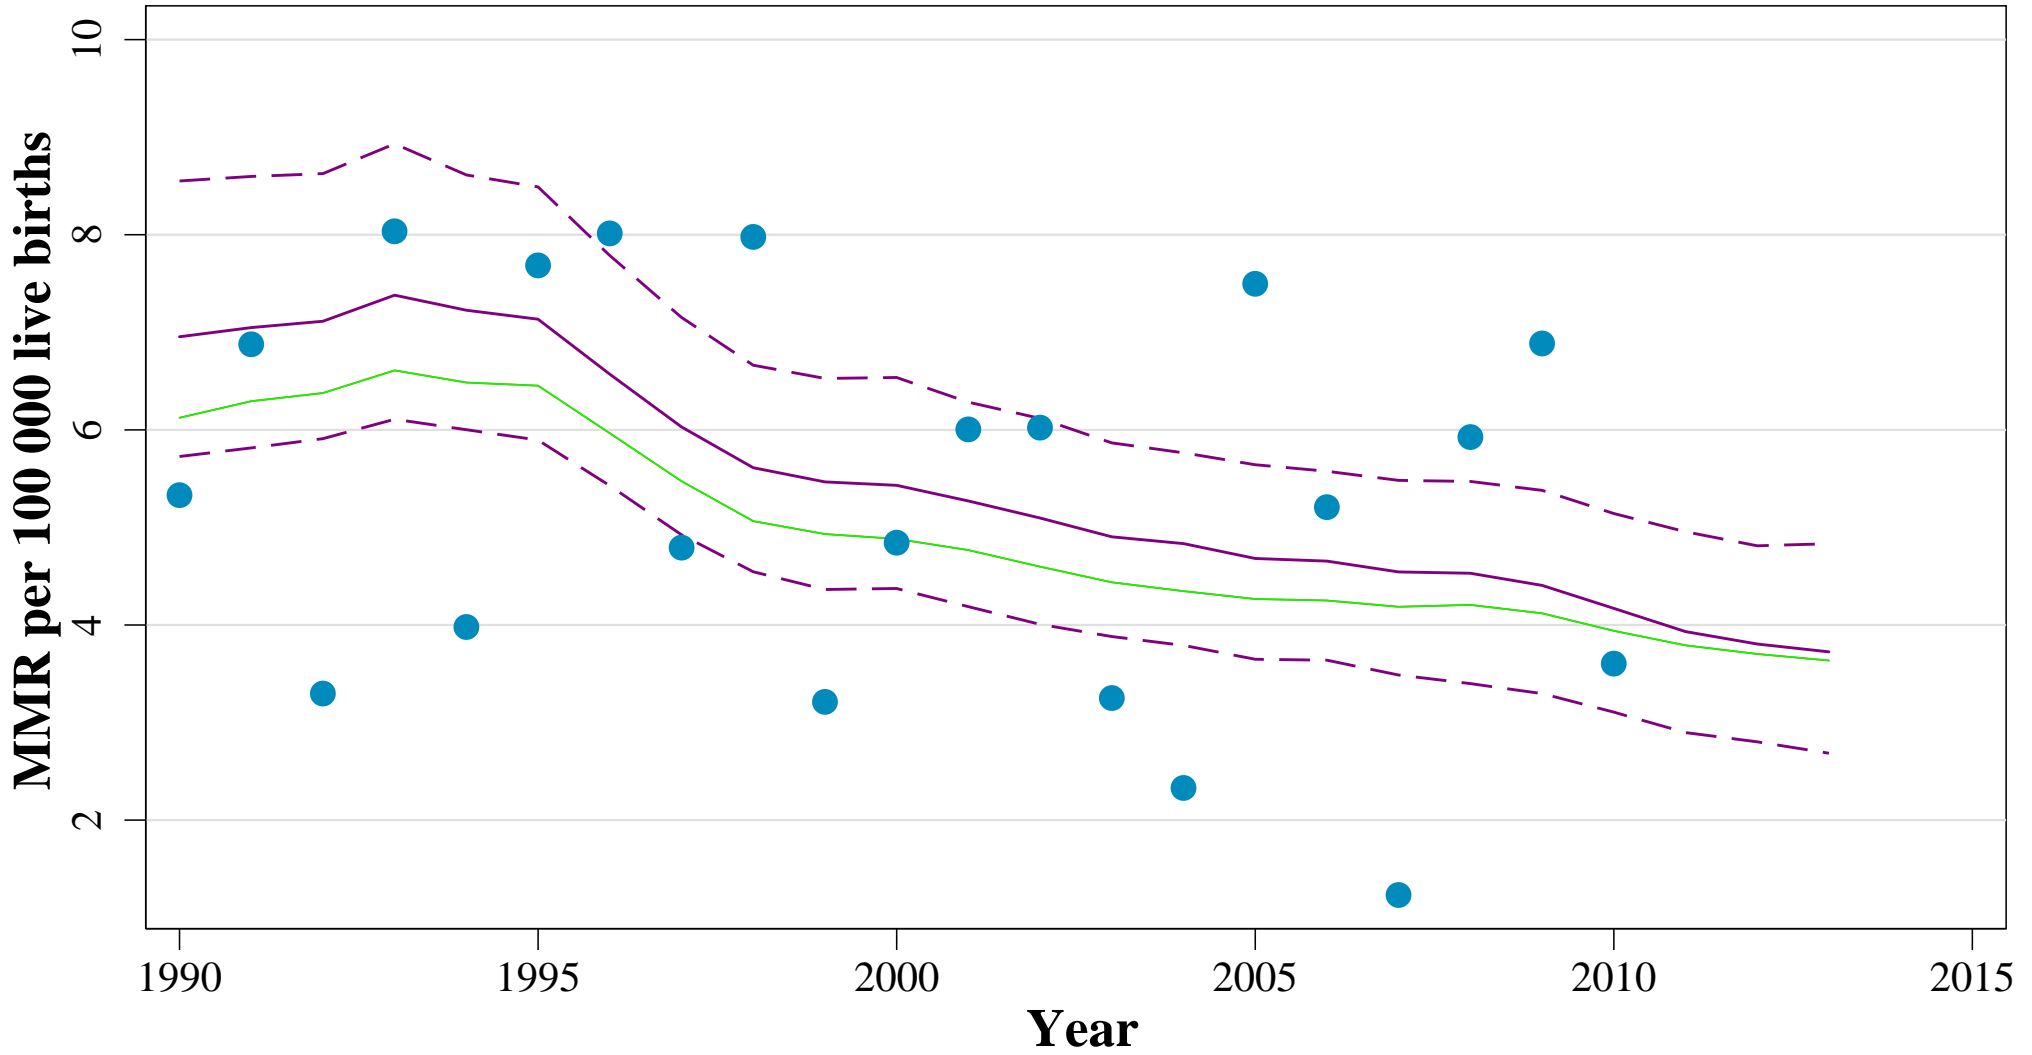

# Switzerland

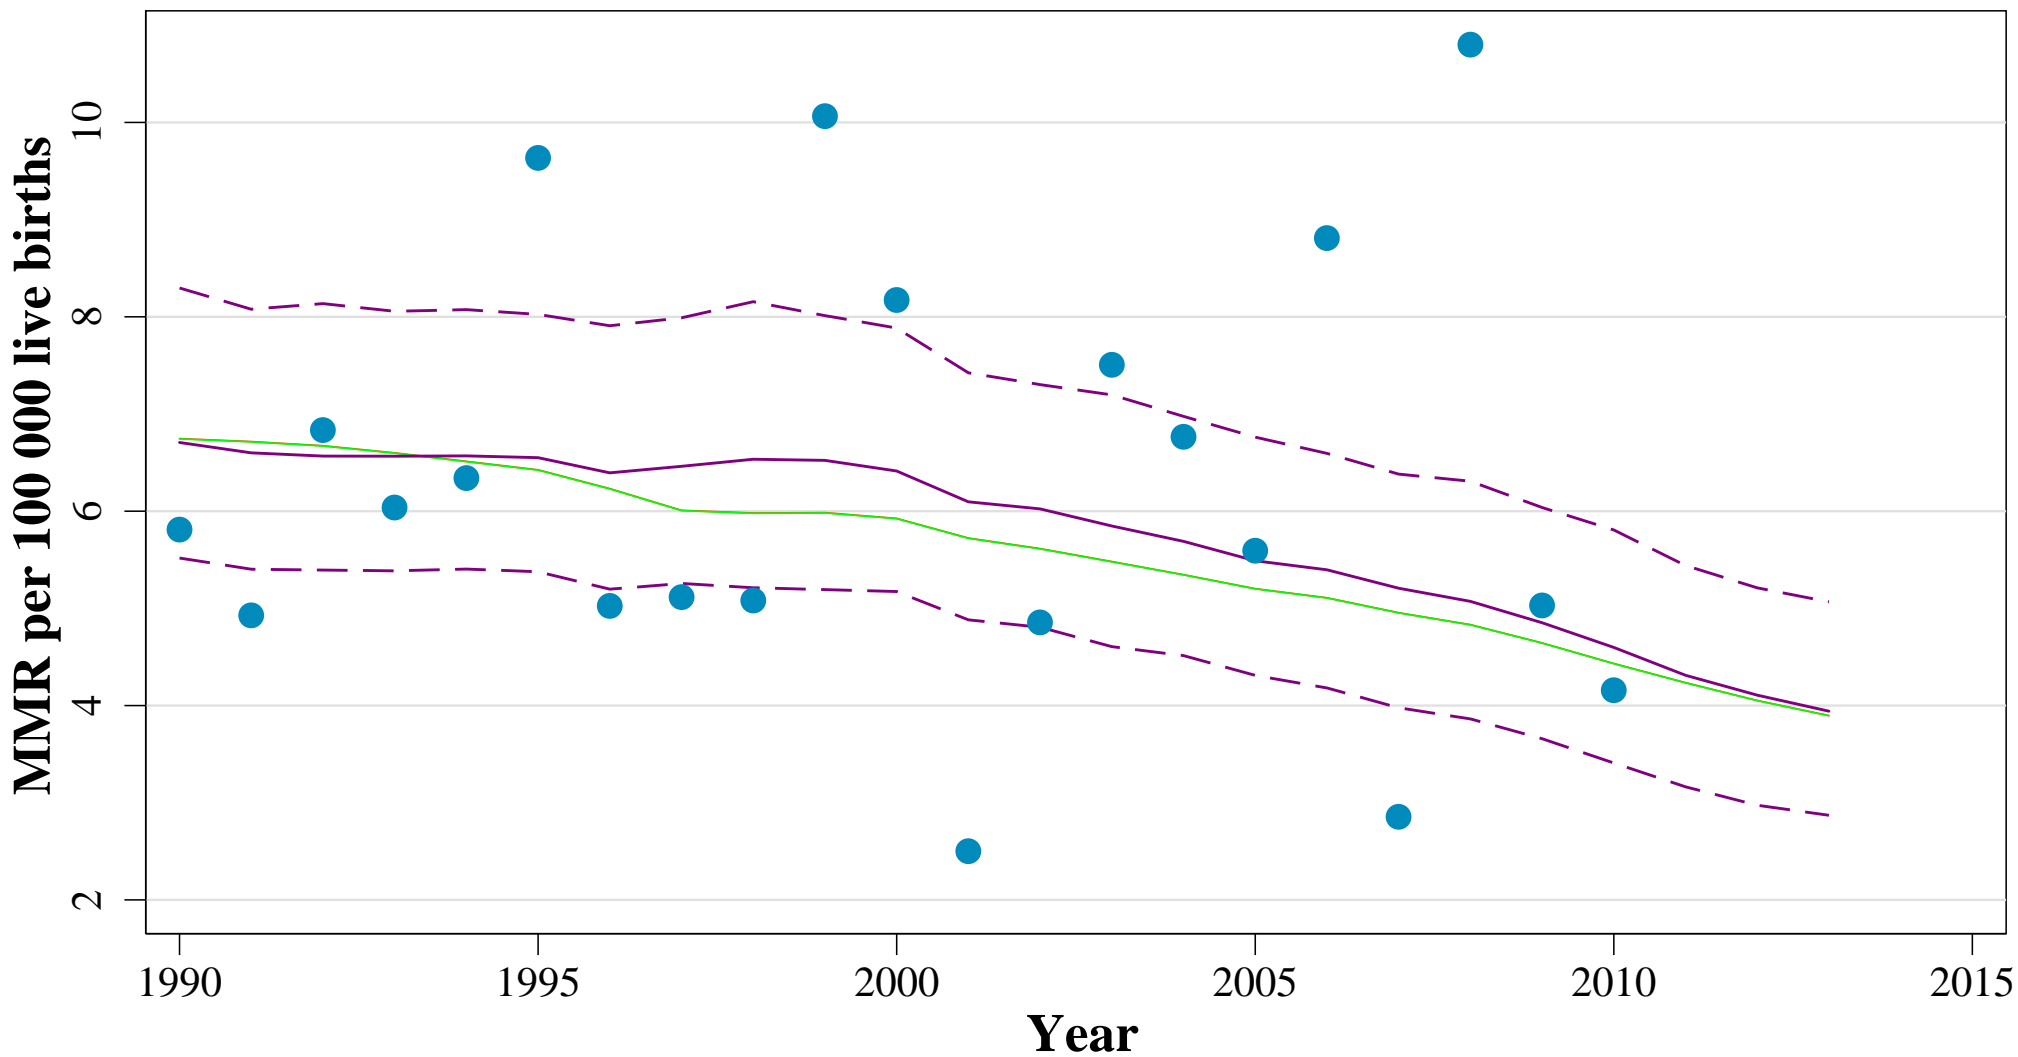



# Syria

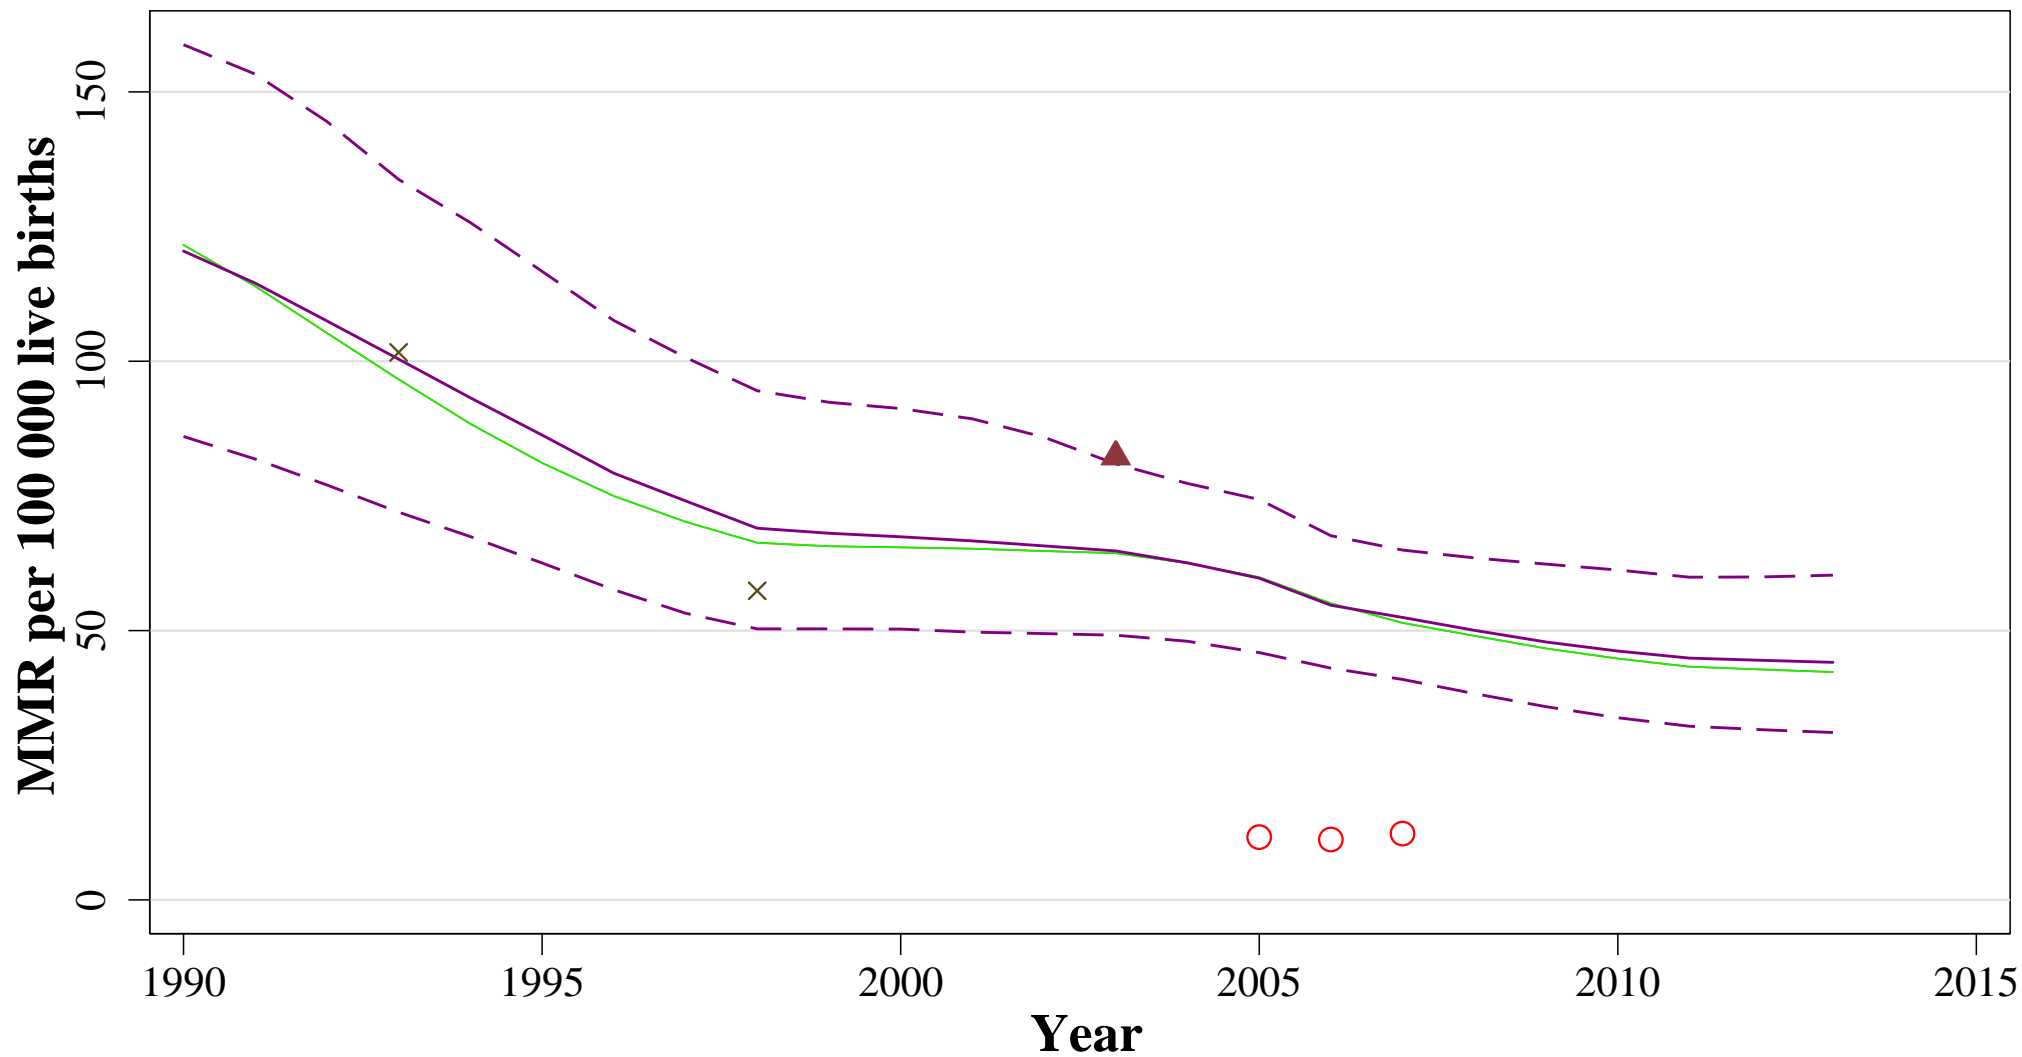

# Taiwan

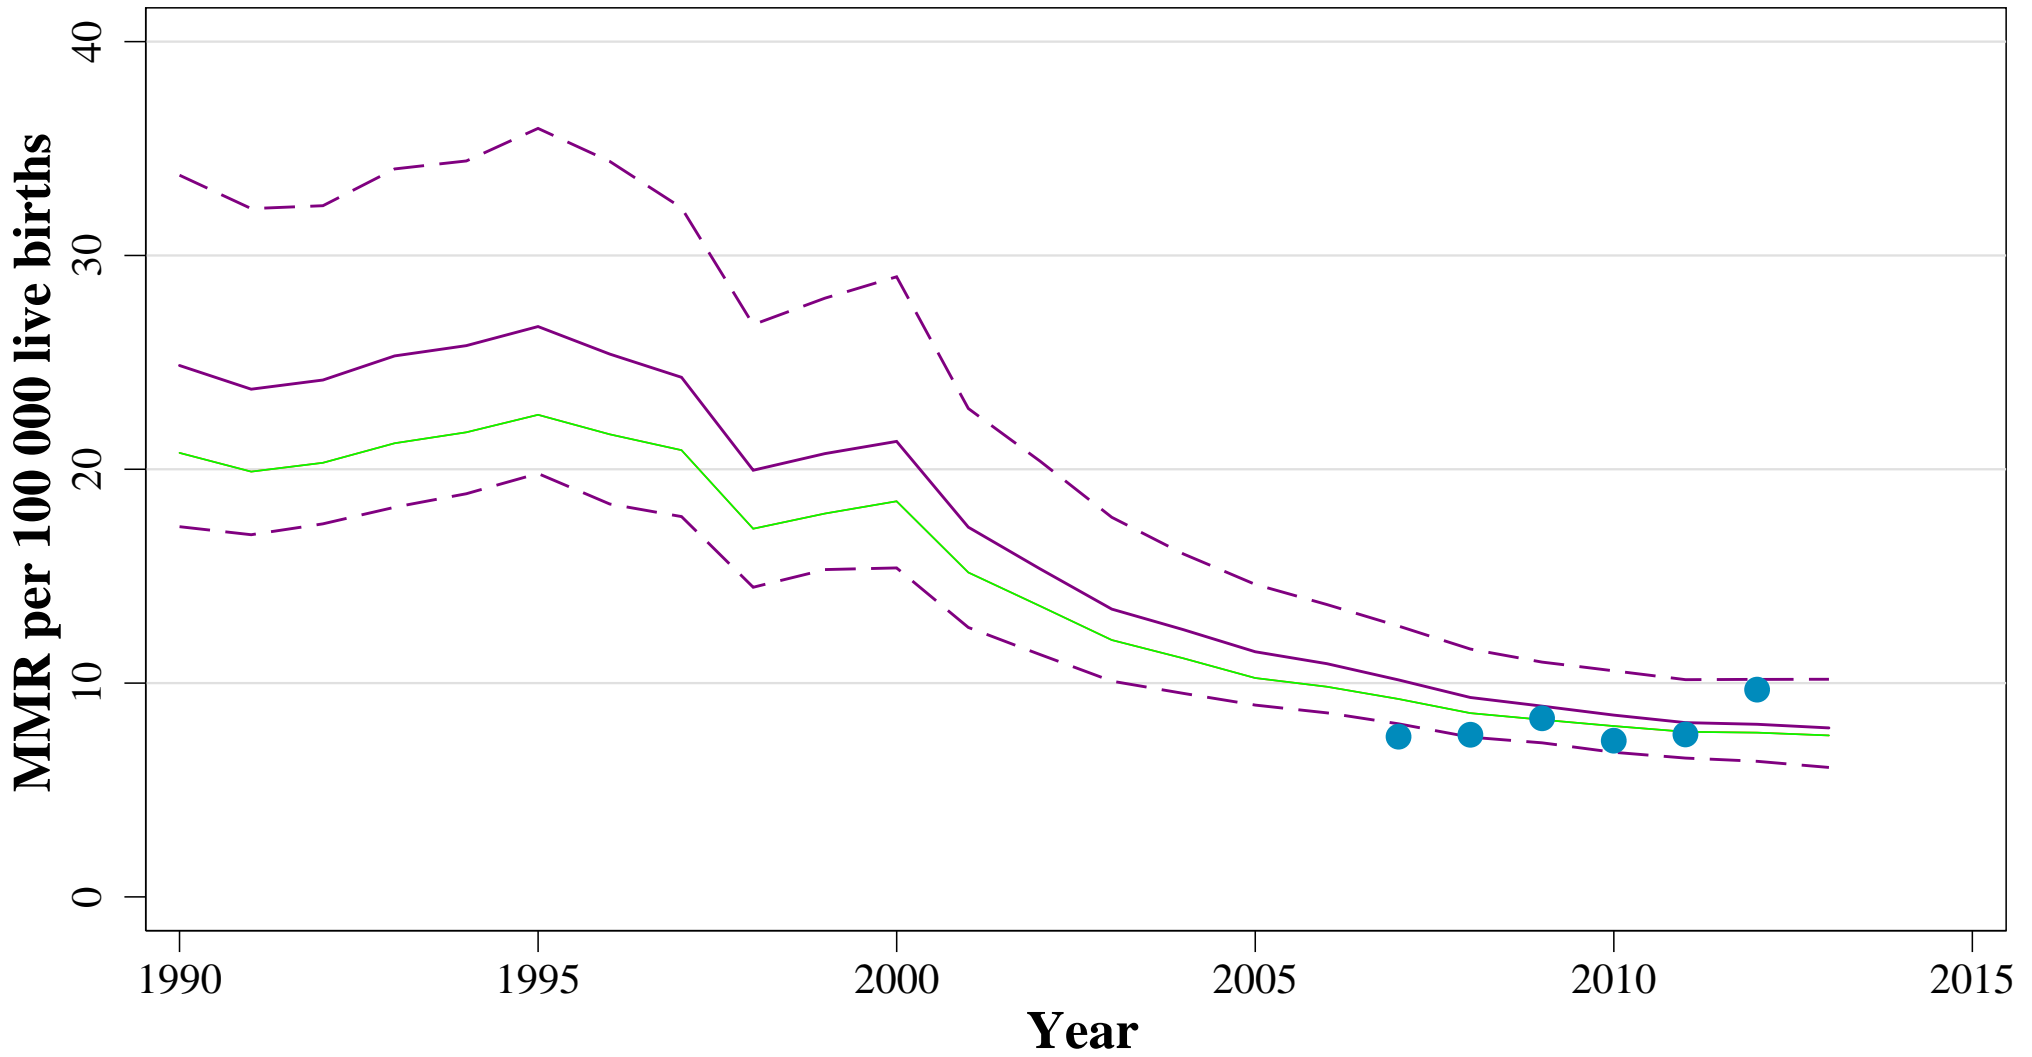

# Tajikistan

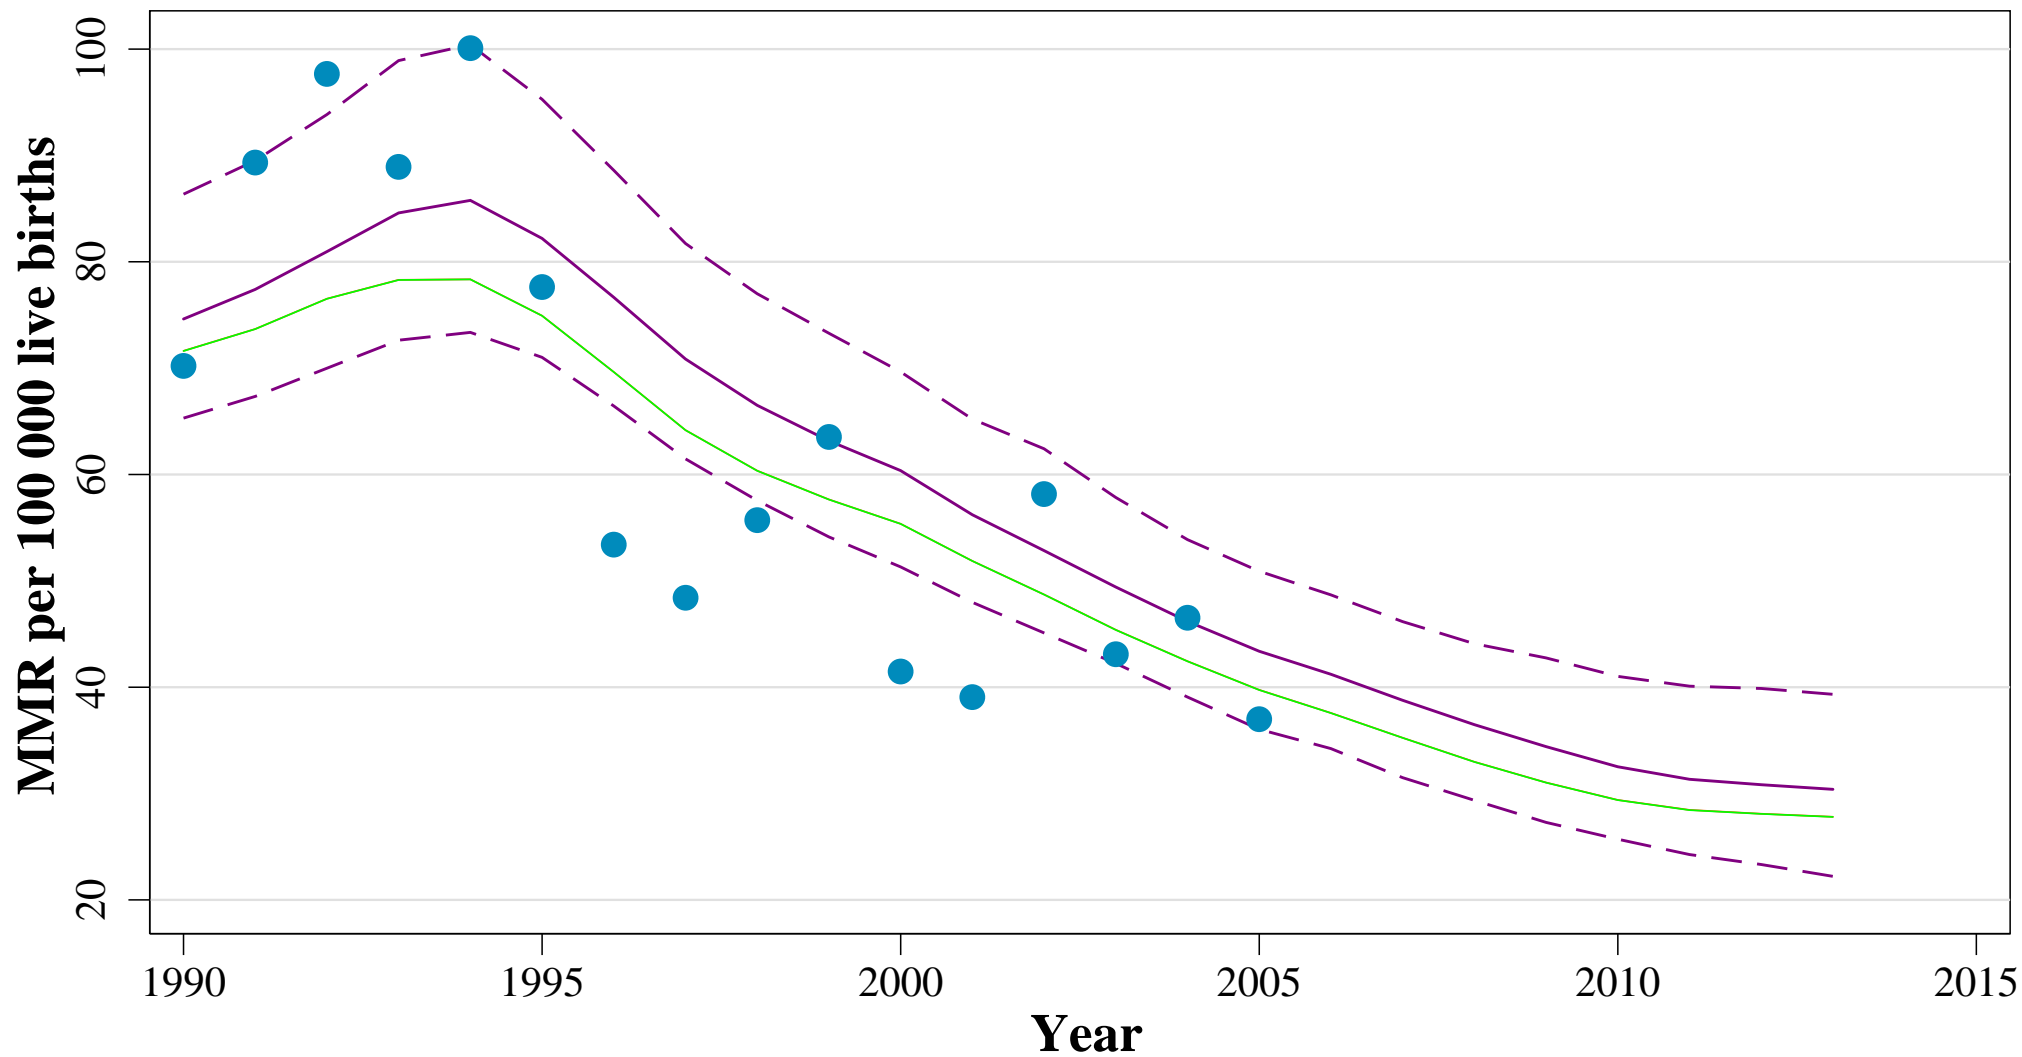

# Tanzania

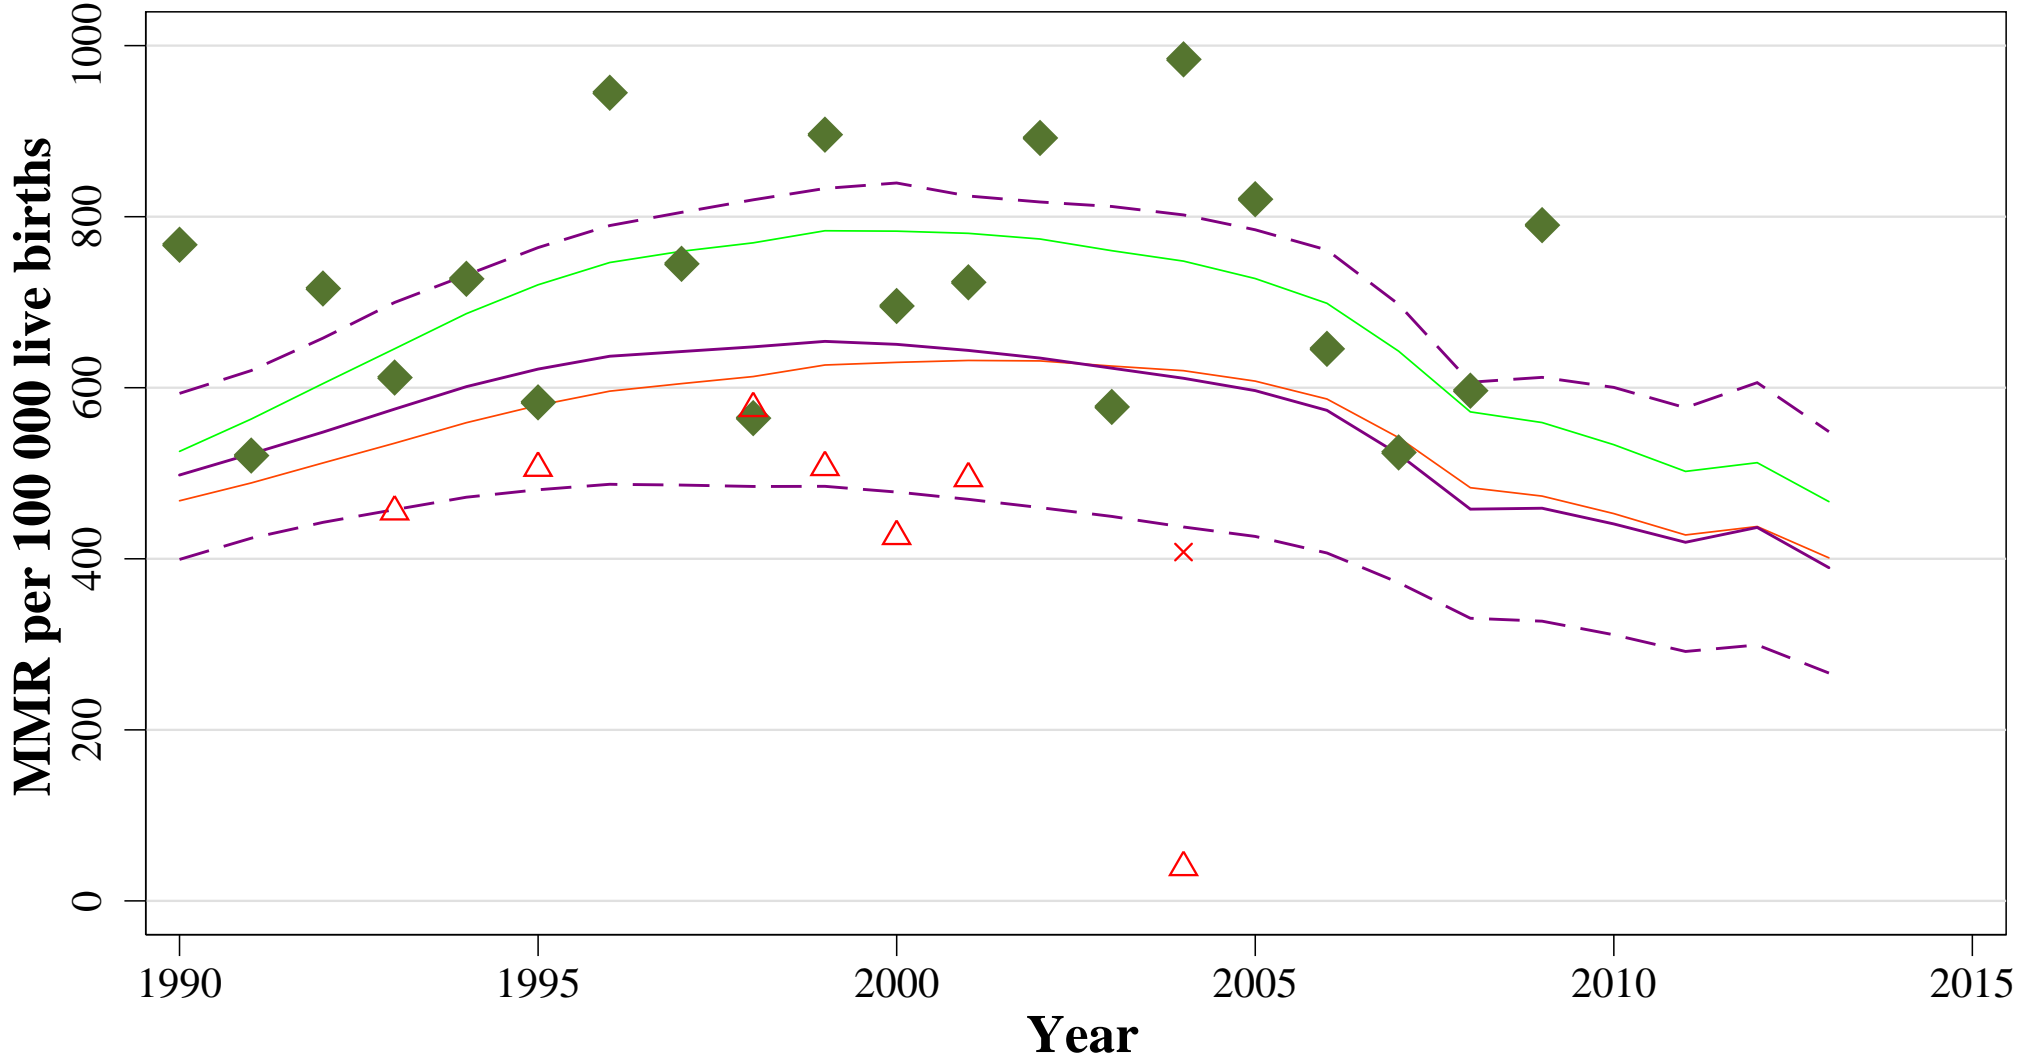

# Thailand

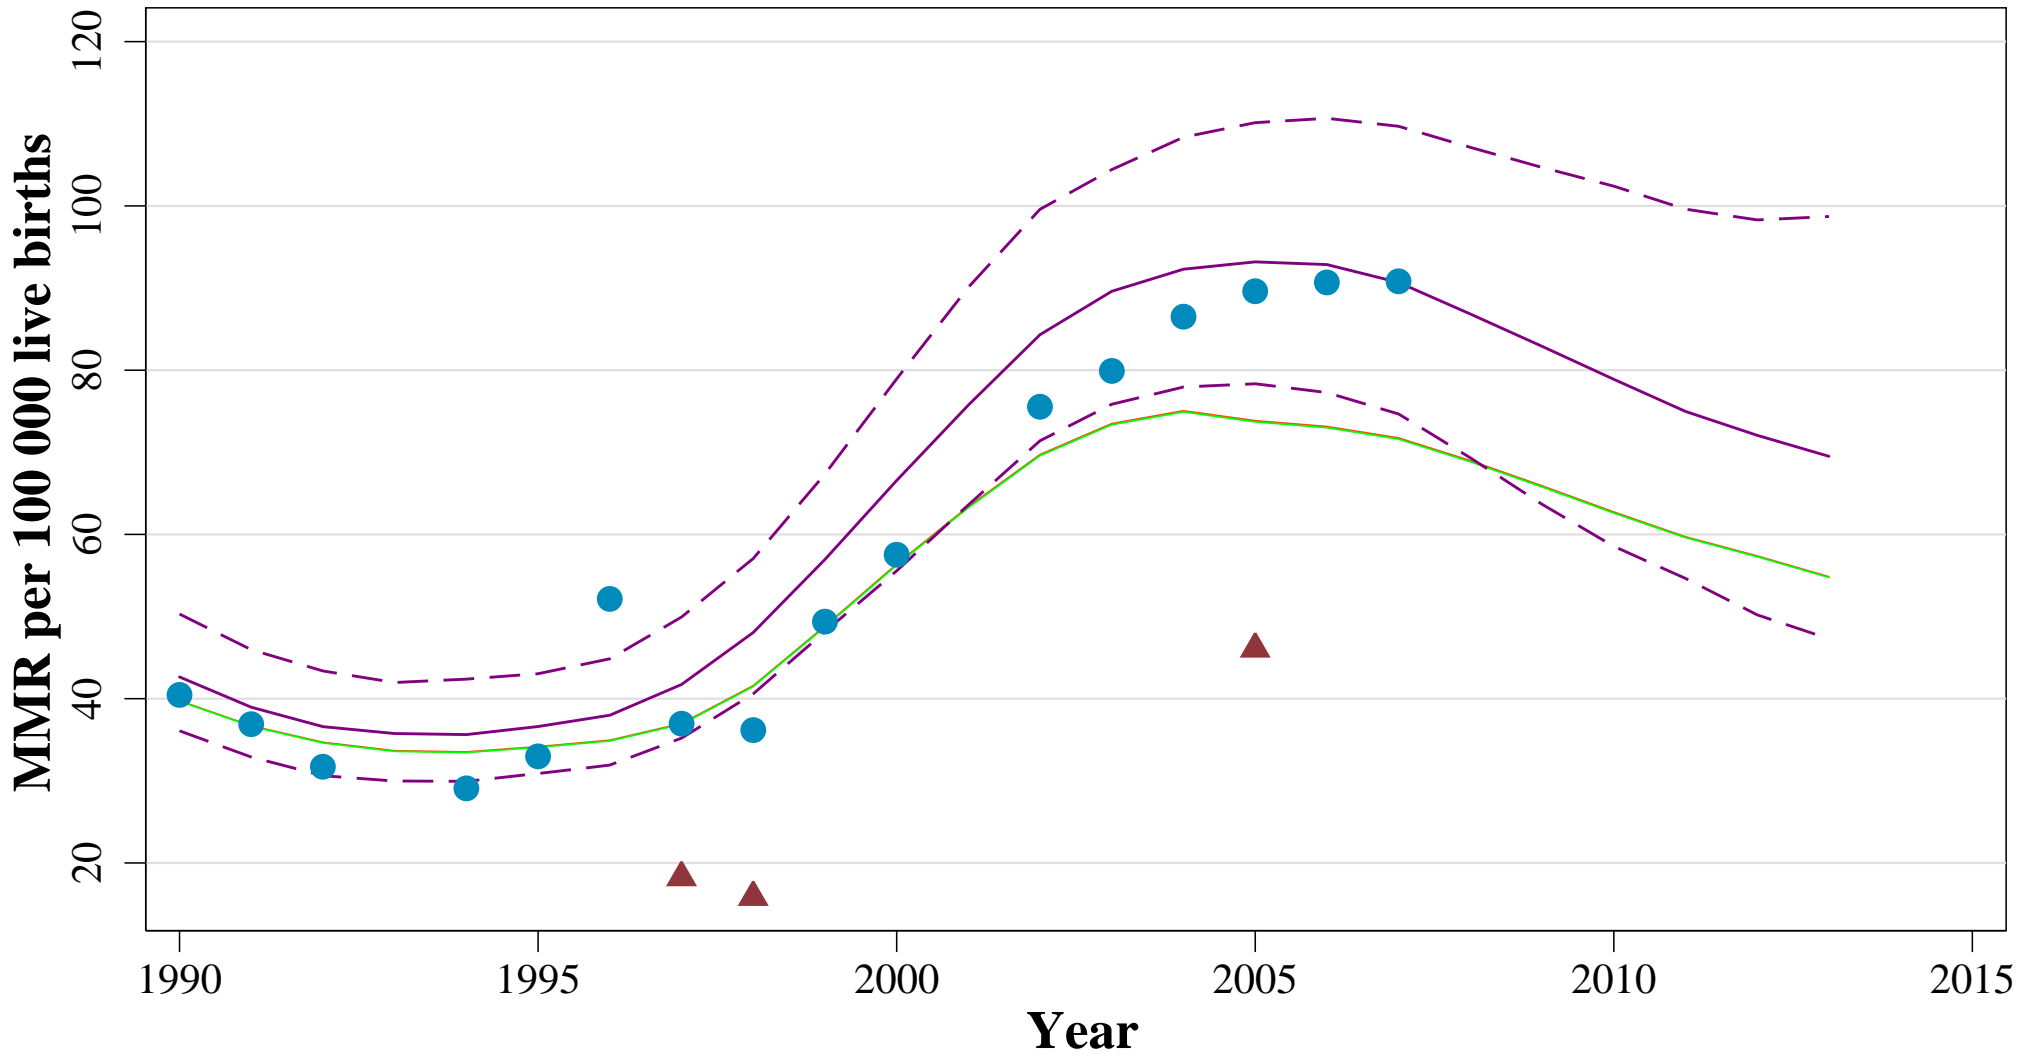

# The Bahamas

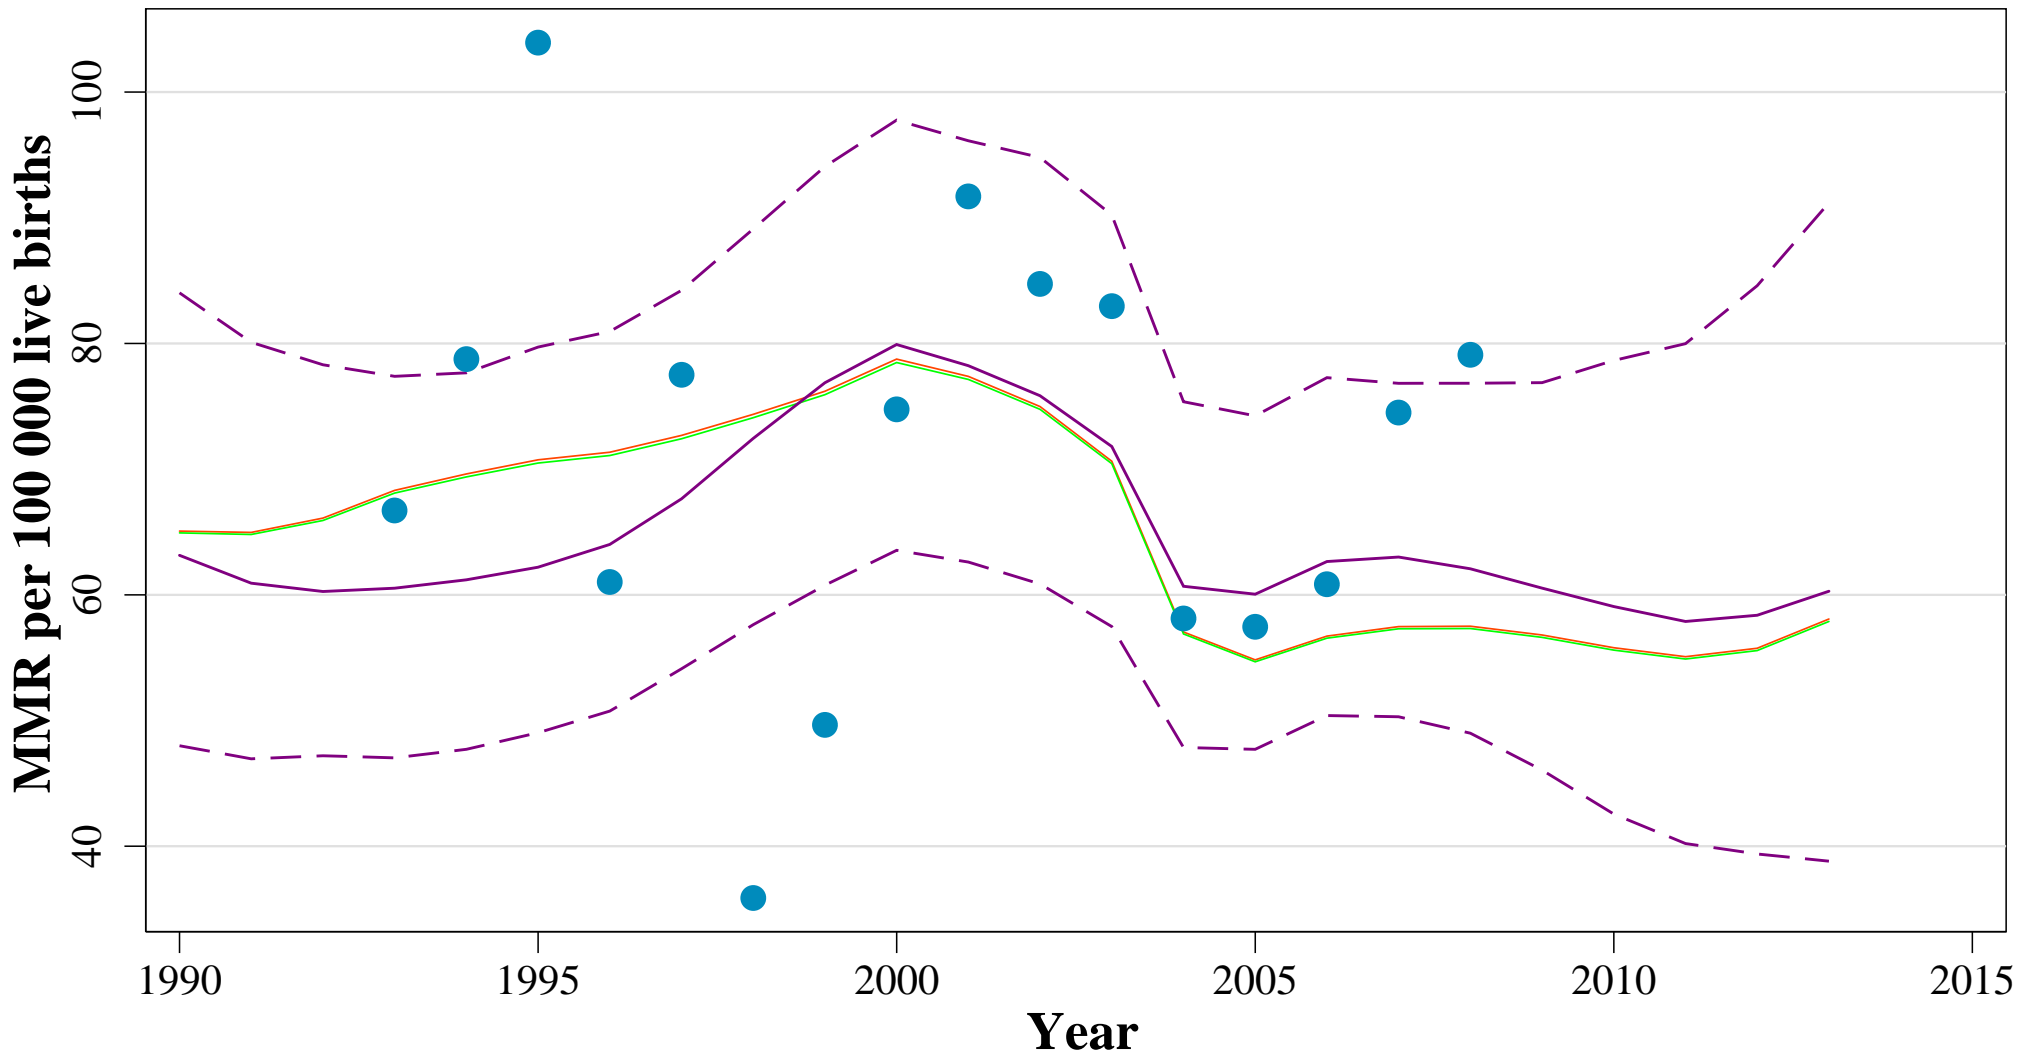

# The Gambia

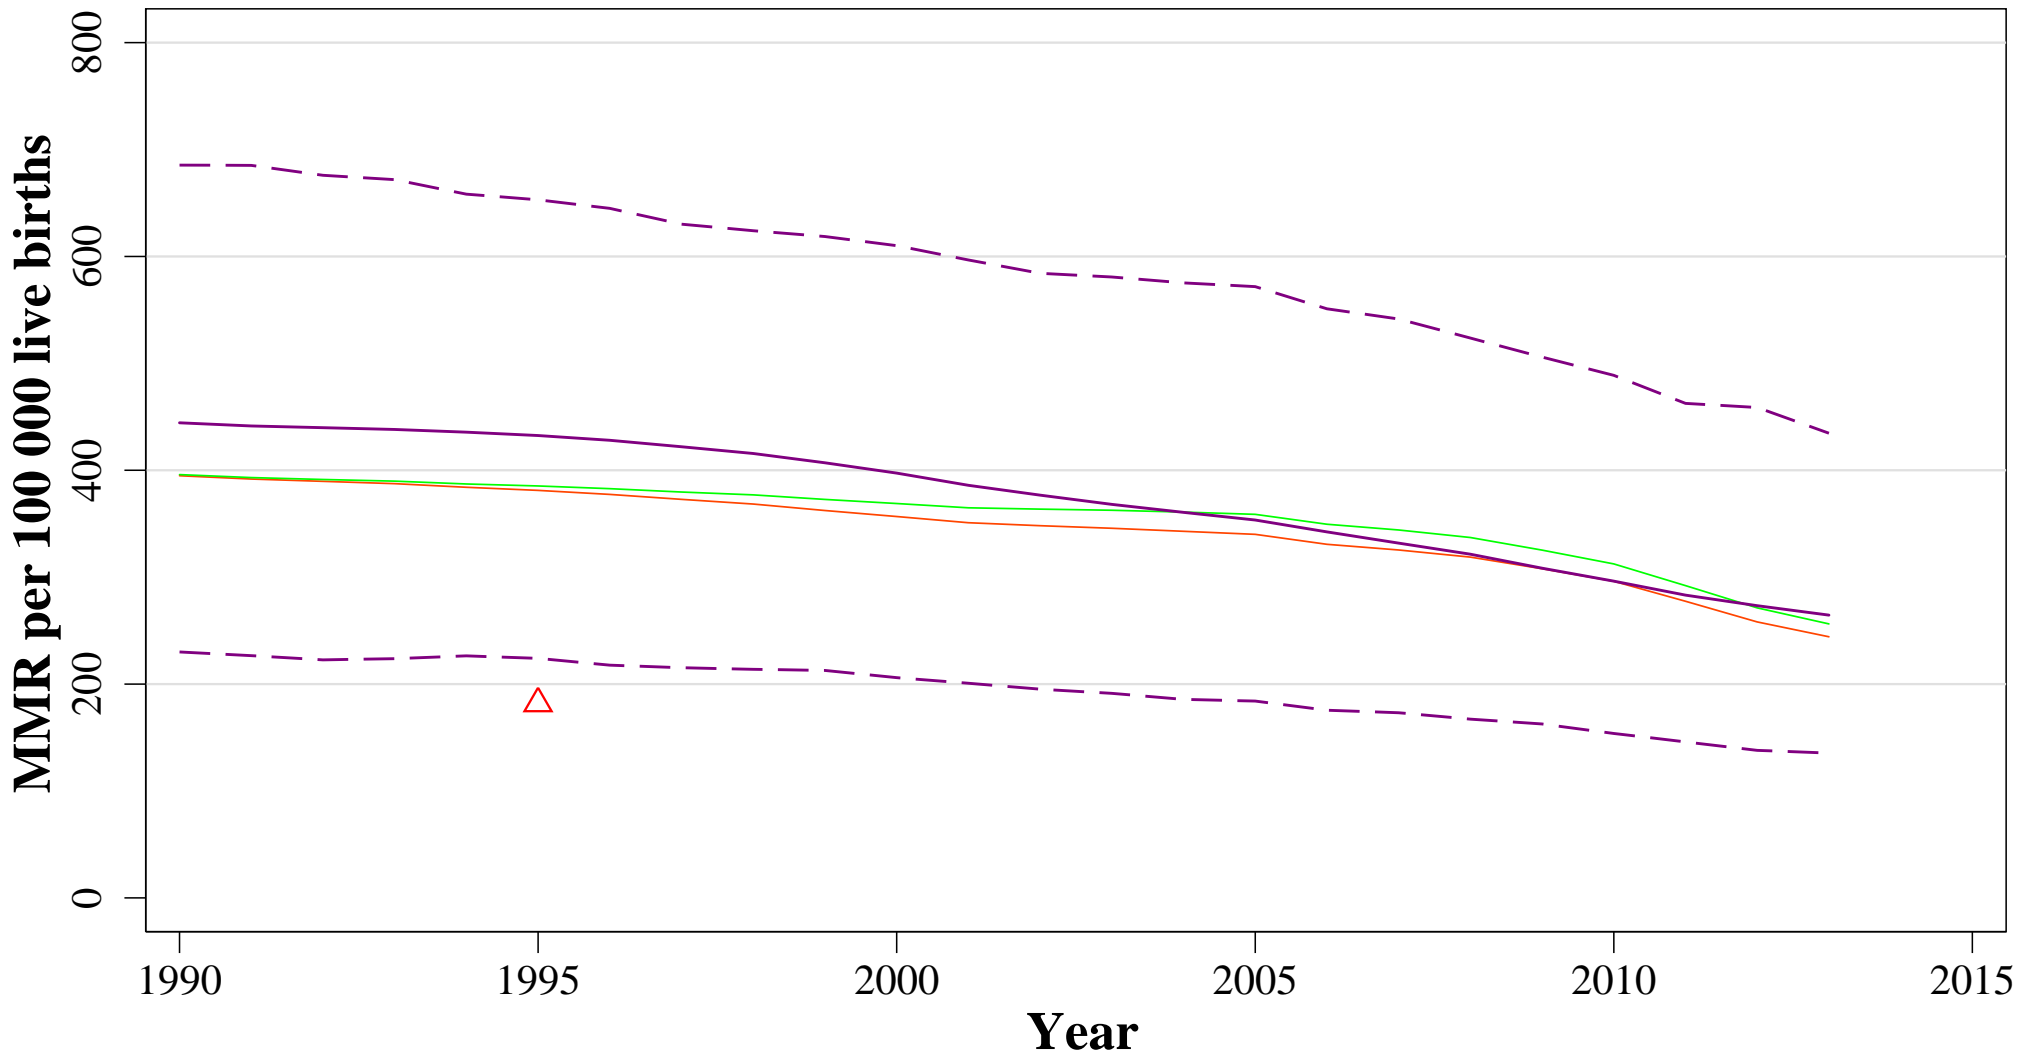

# Timor-Leste

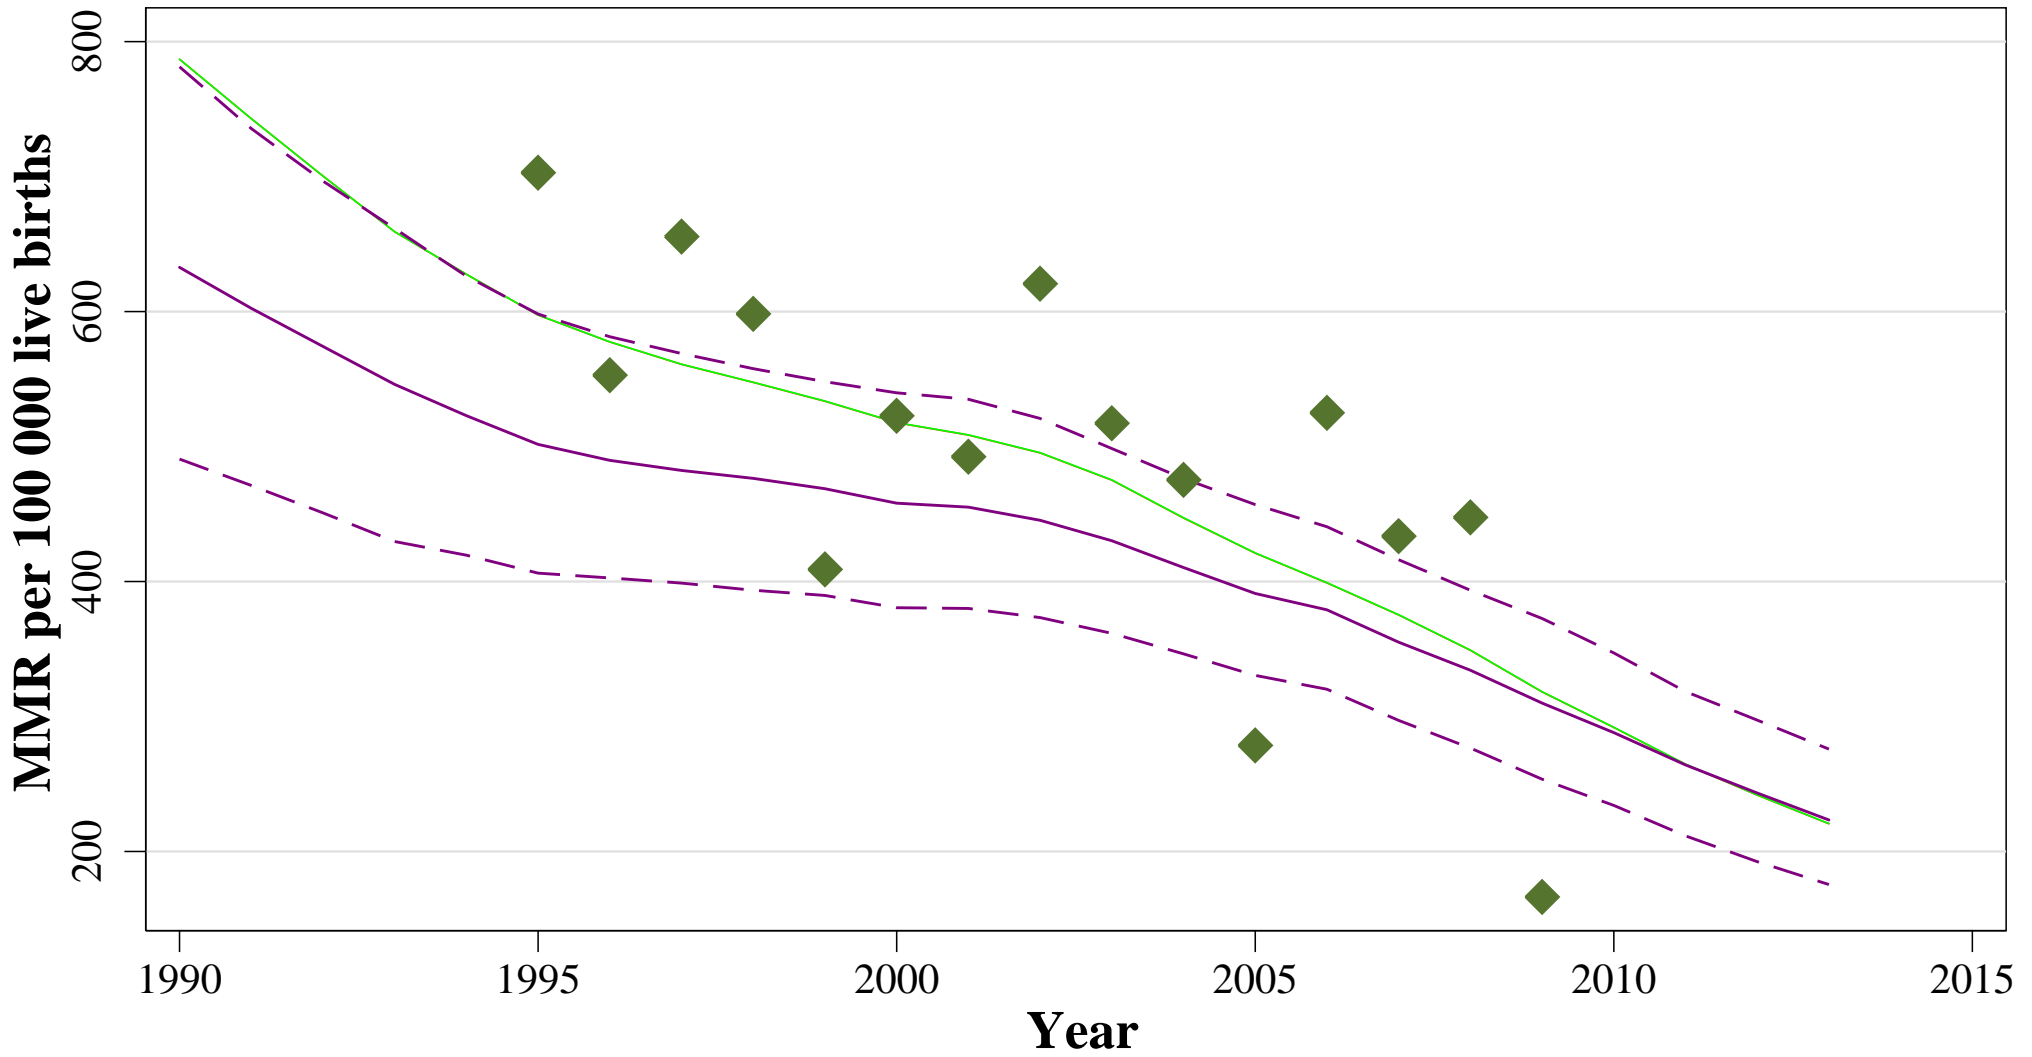



# Togo

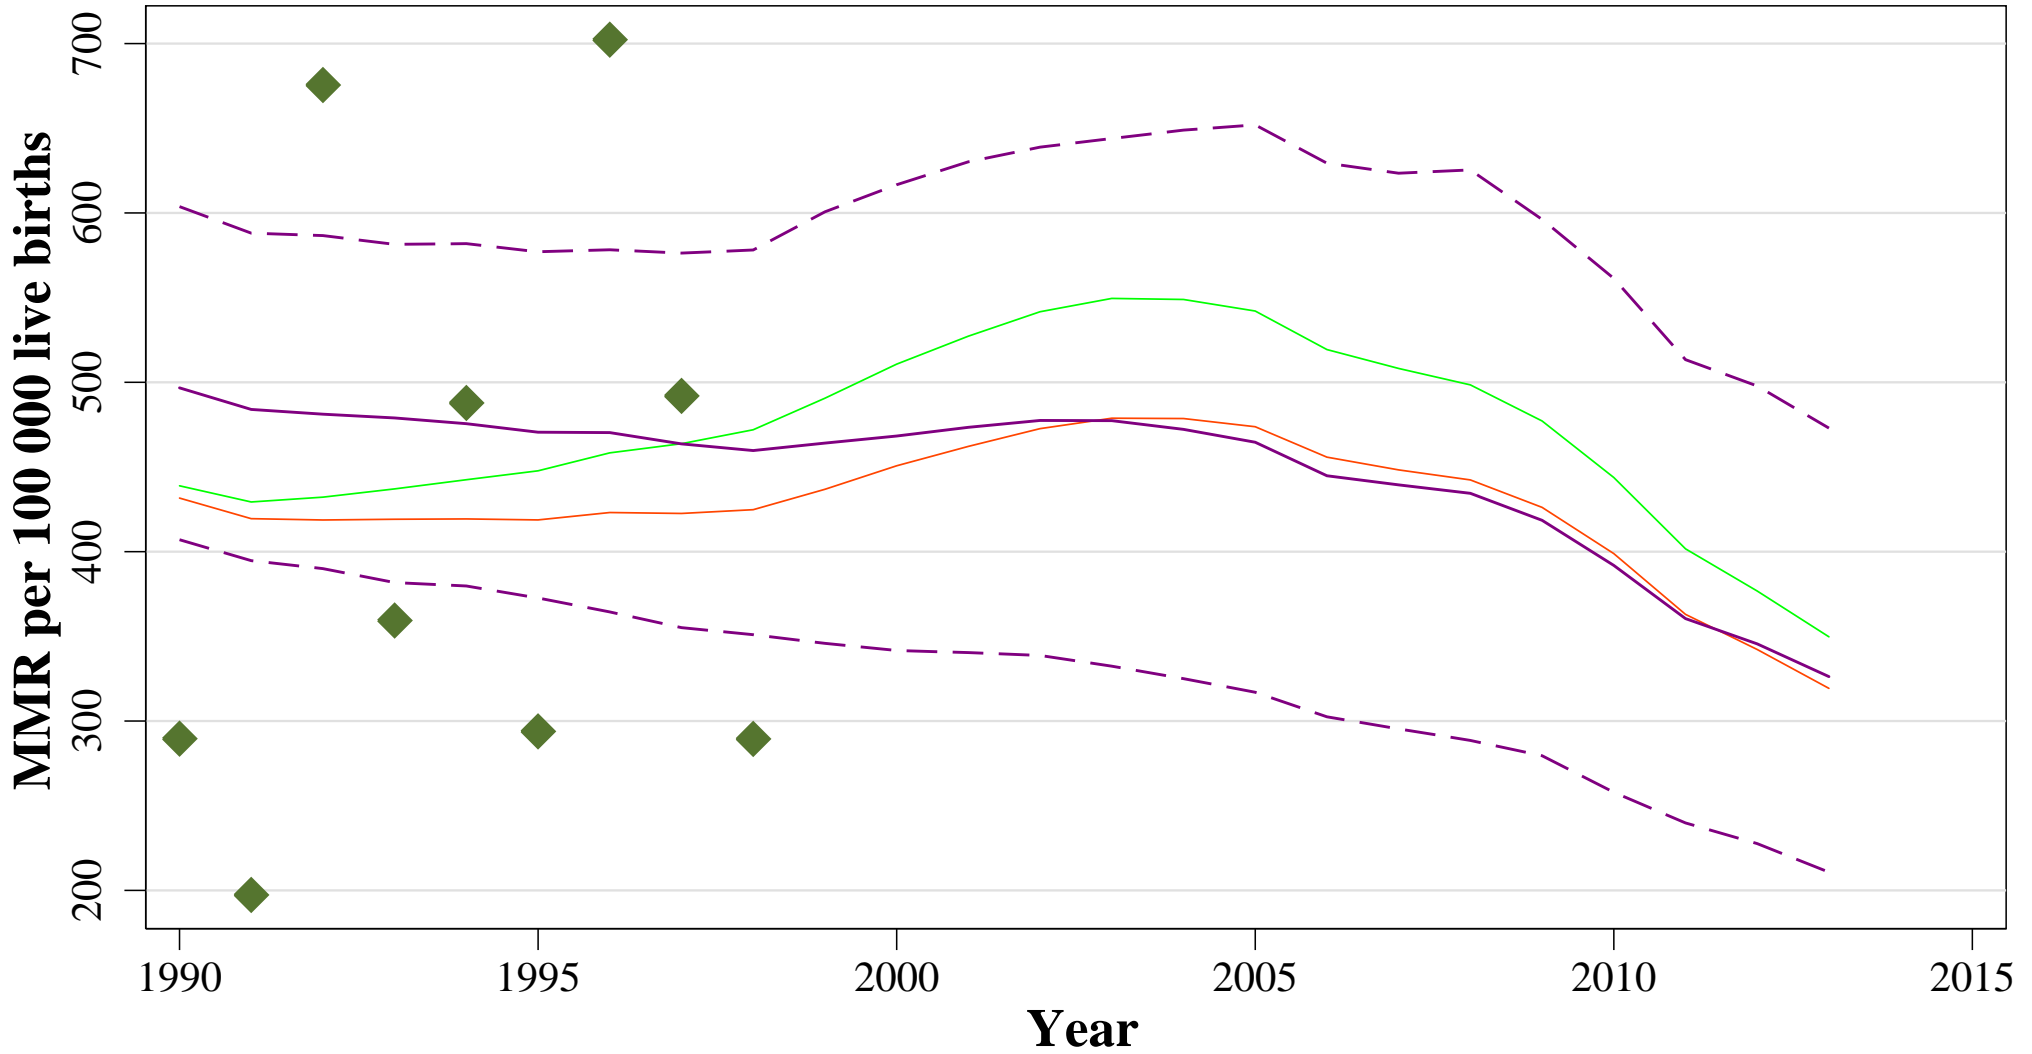

# Tonga

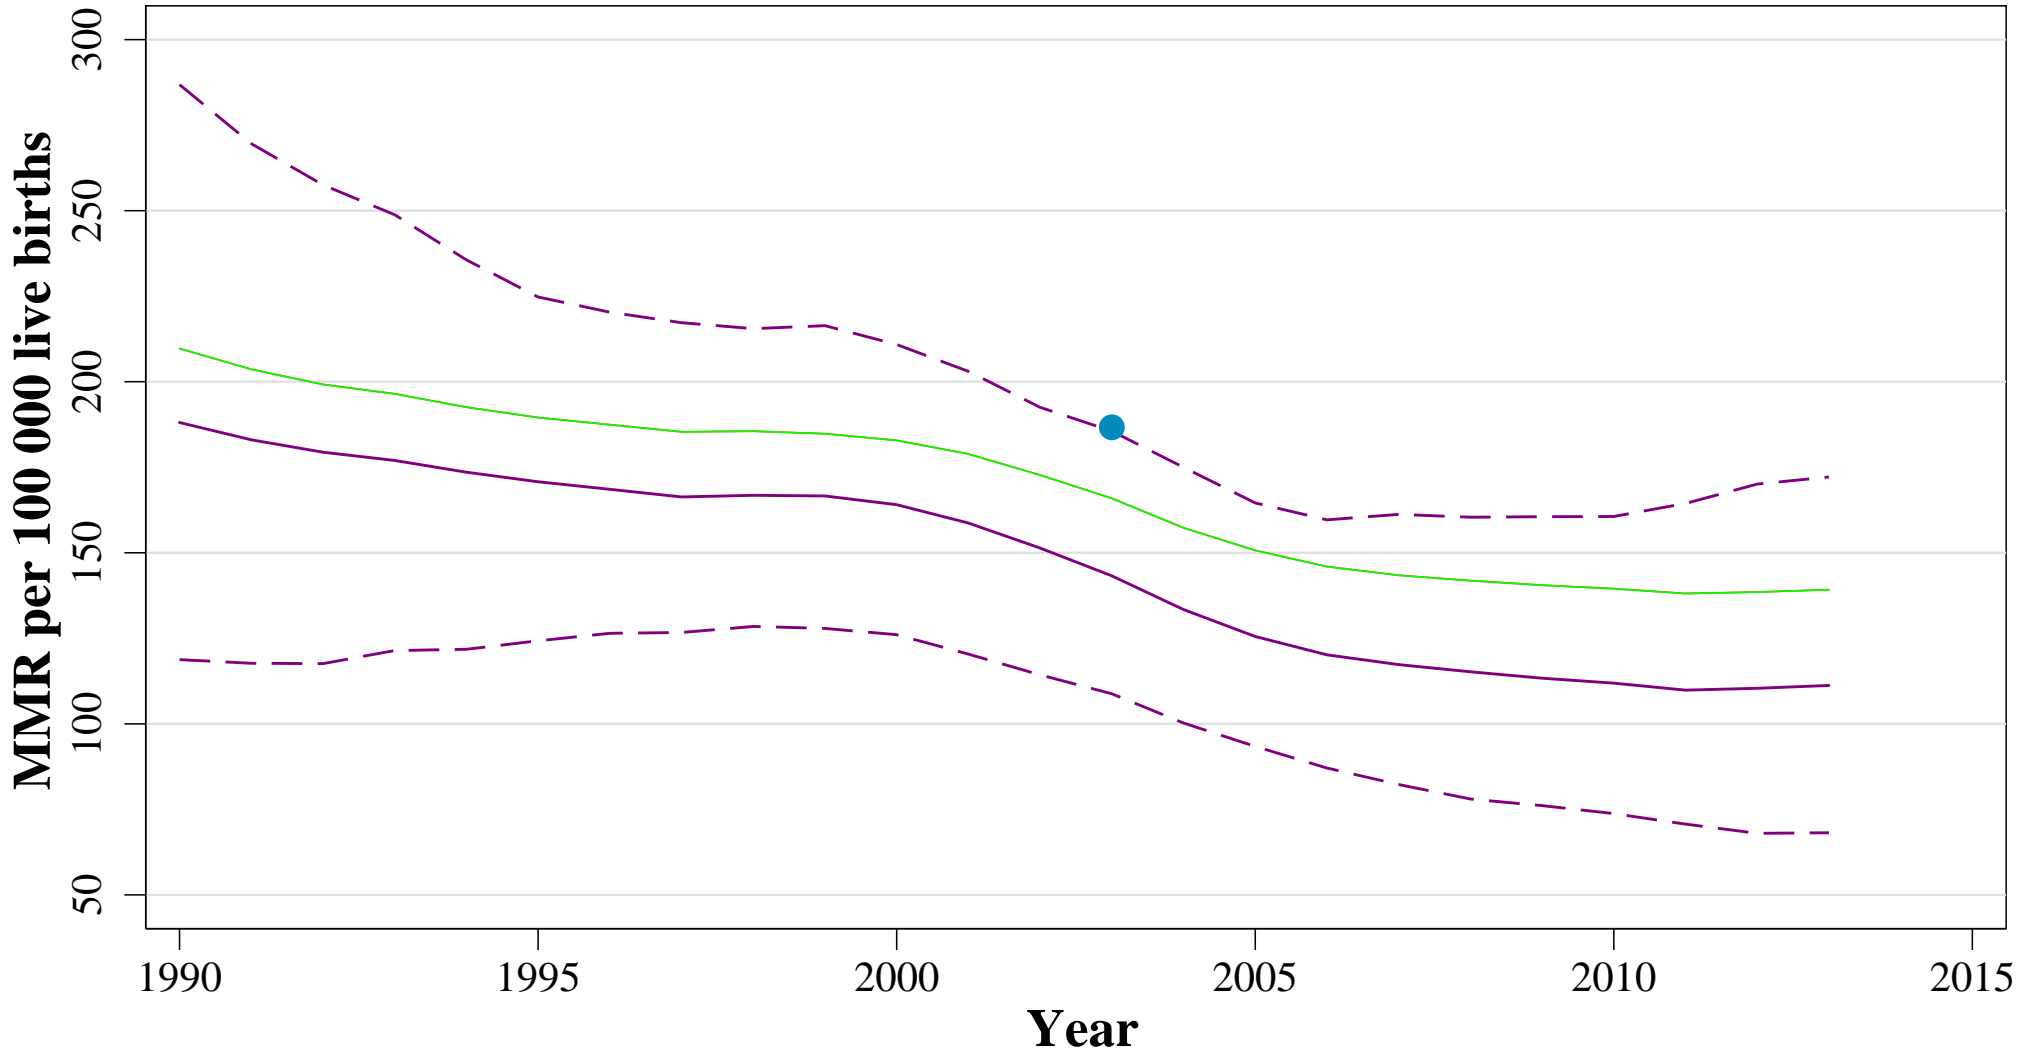

# Trinidad and Tobago

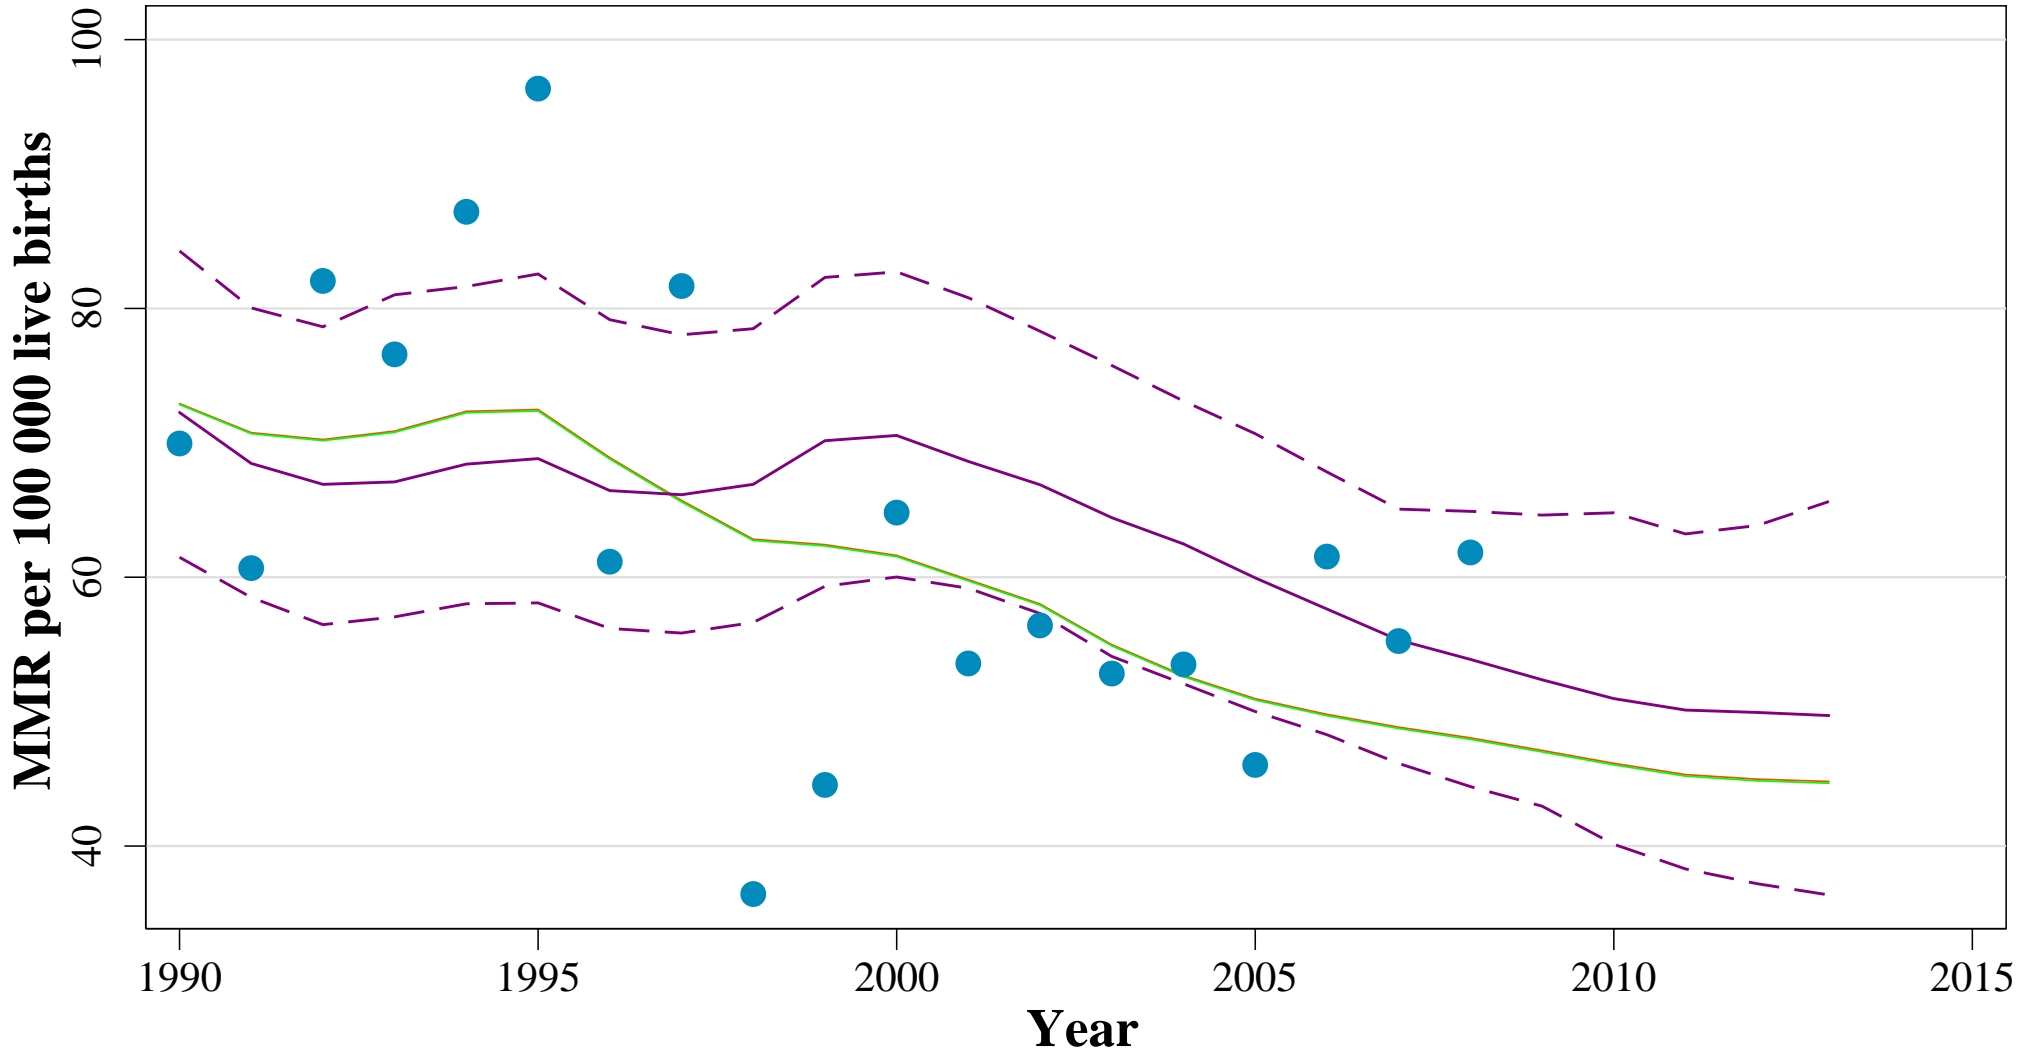

# Tunisia

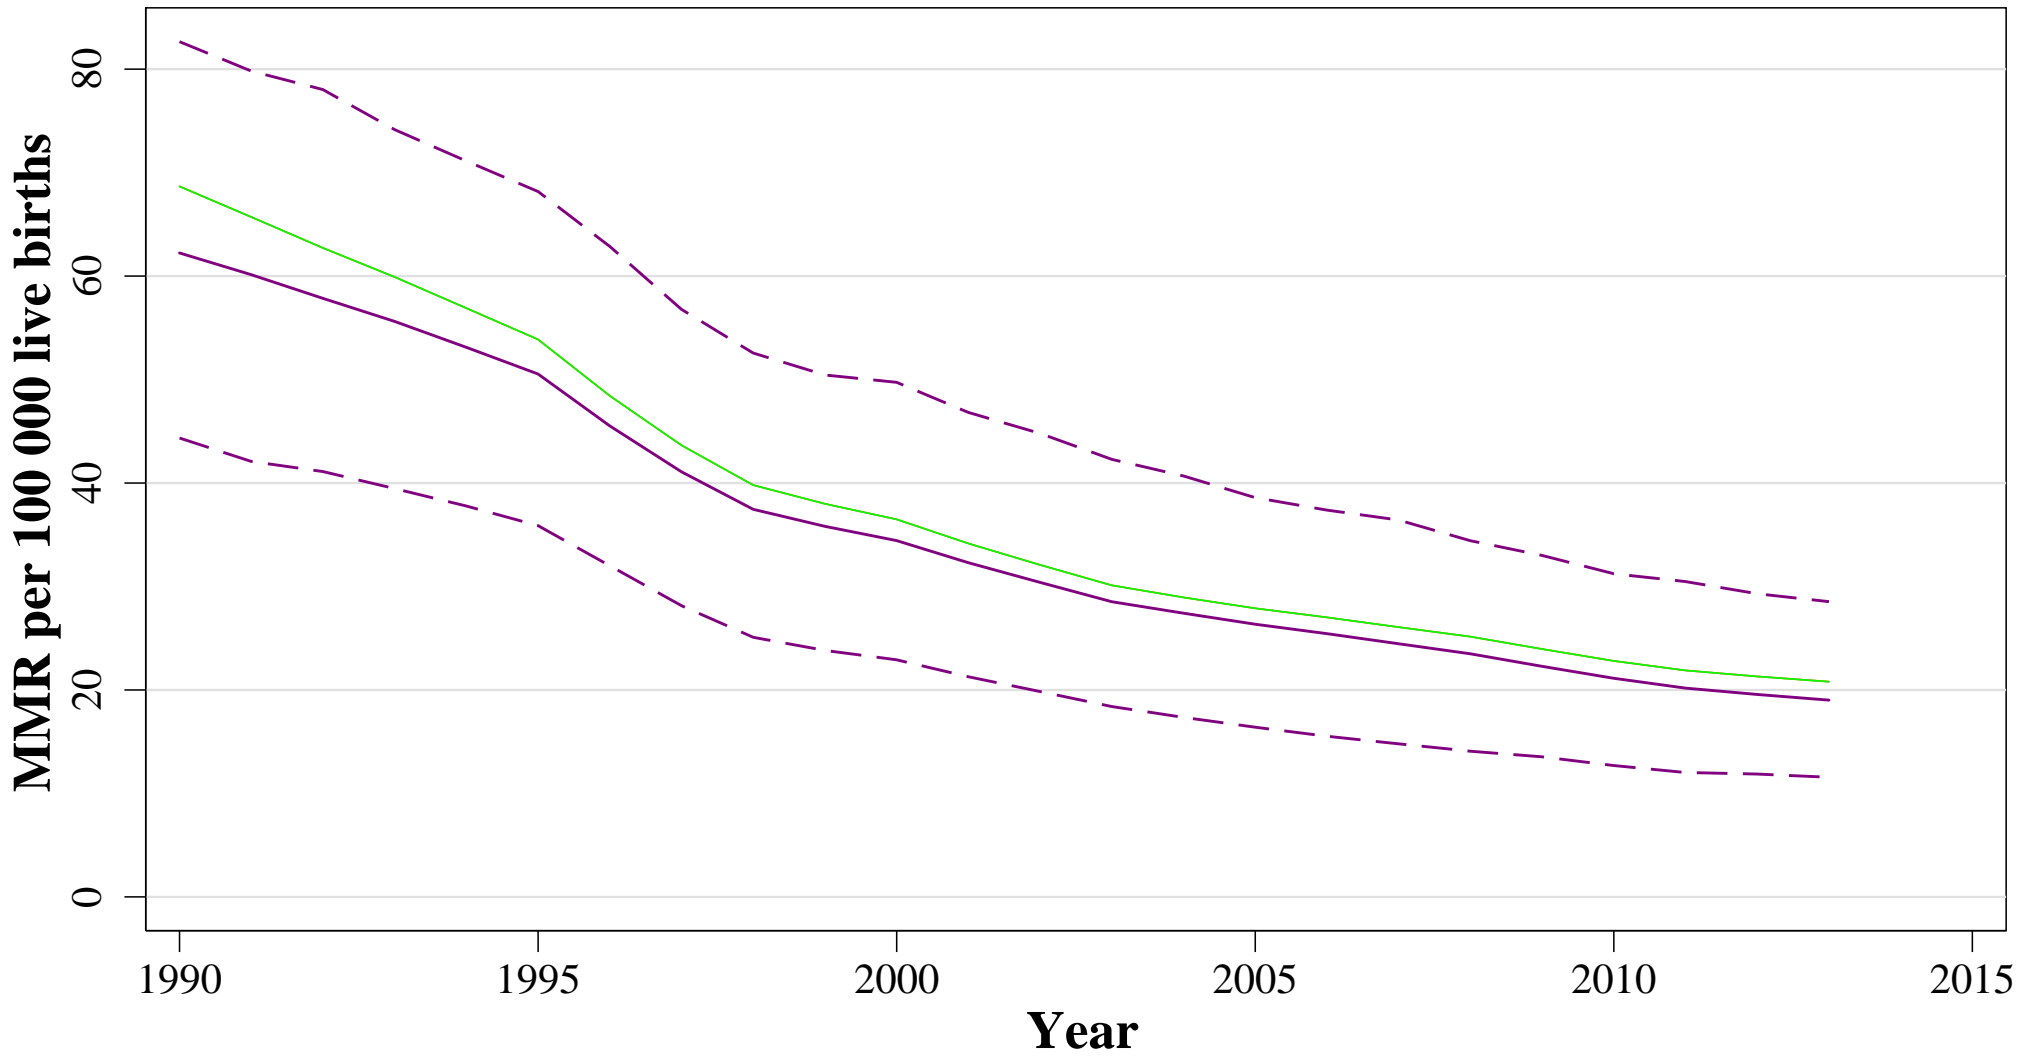

# Turkey

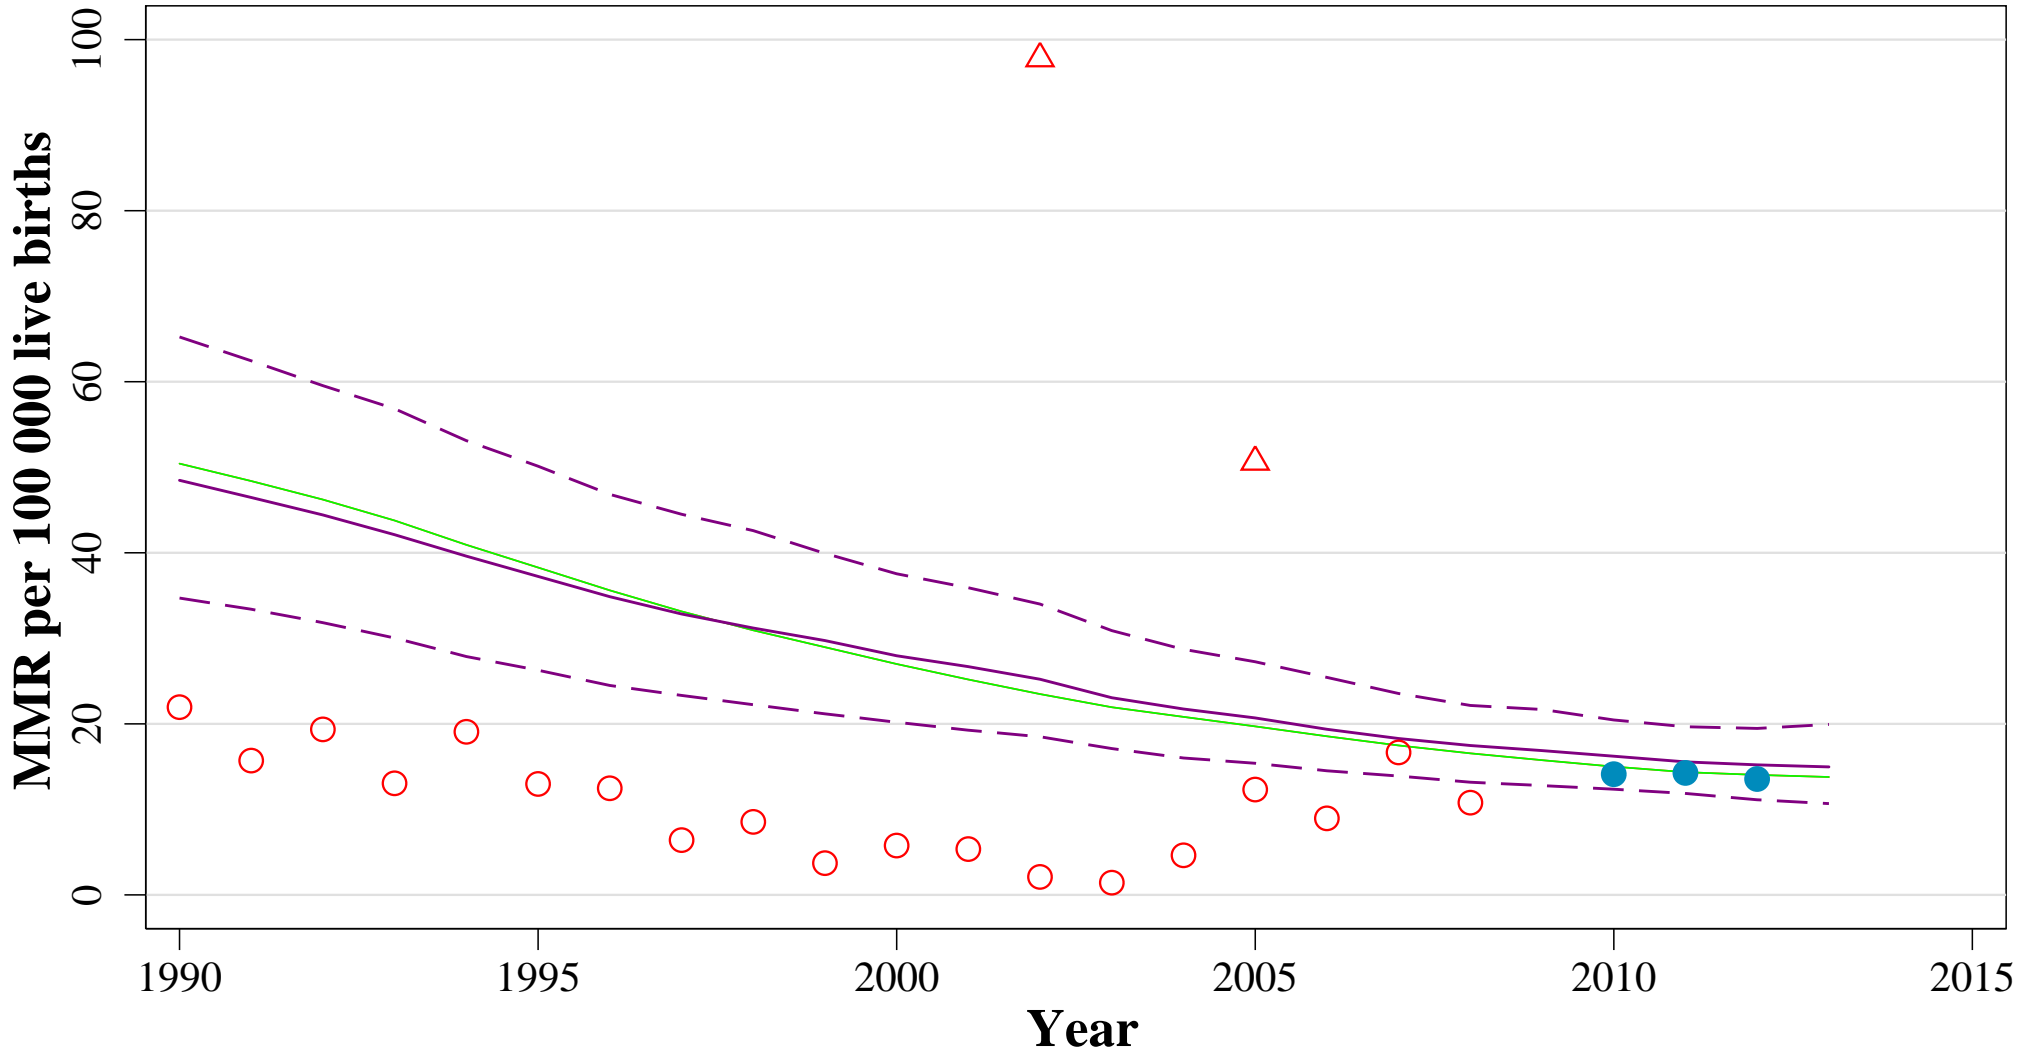

# Turkmenistan

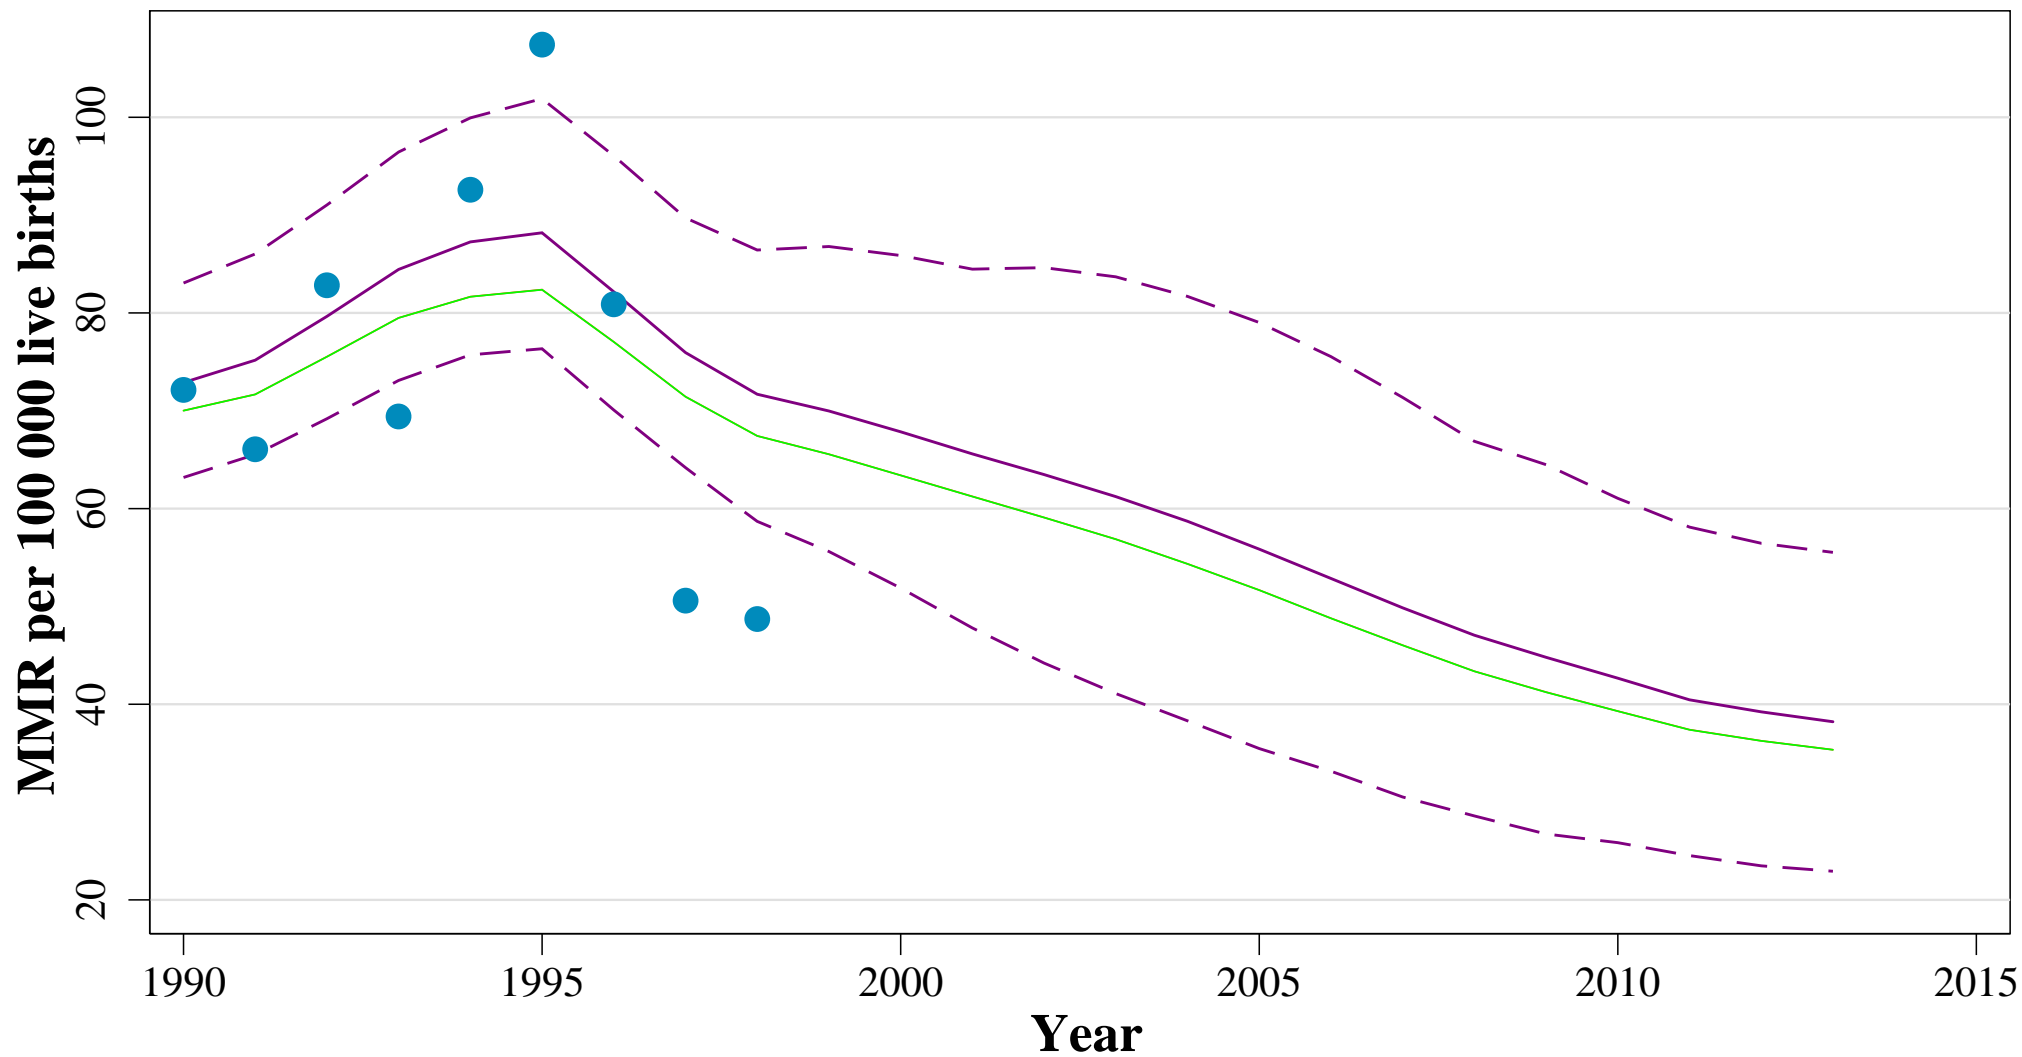

# Uganda

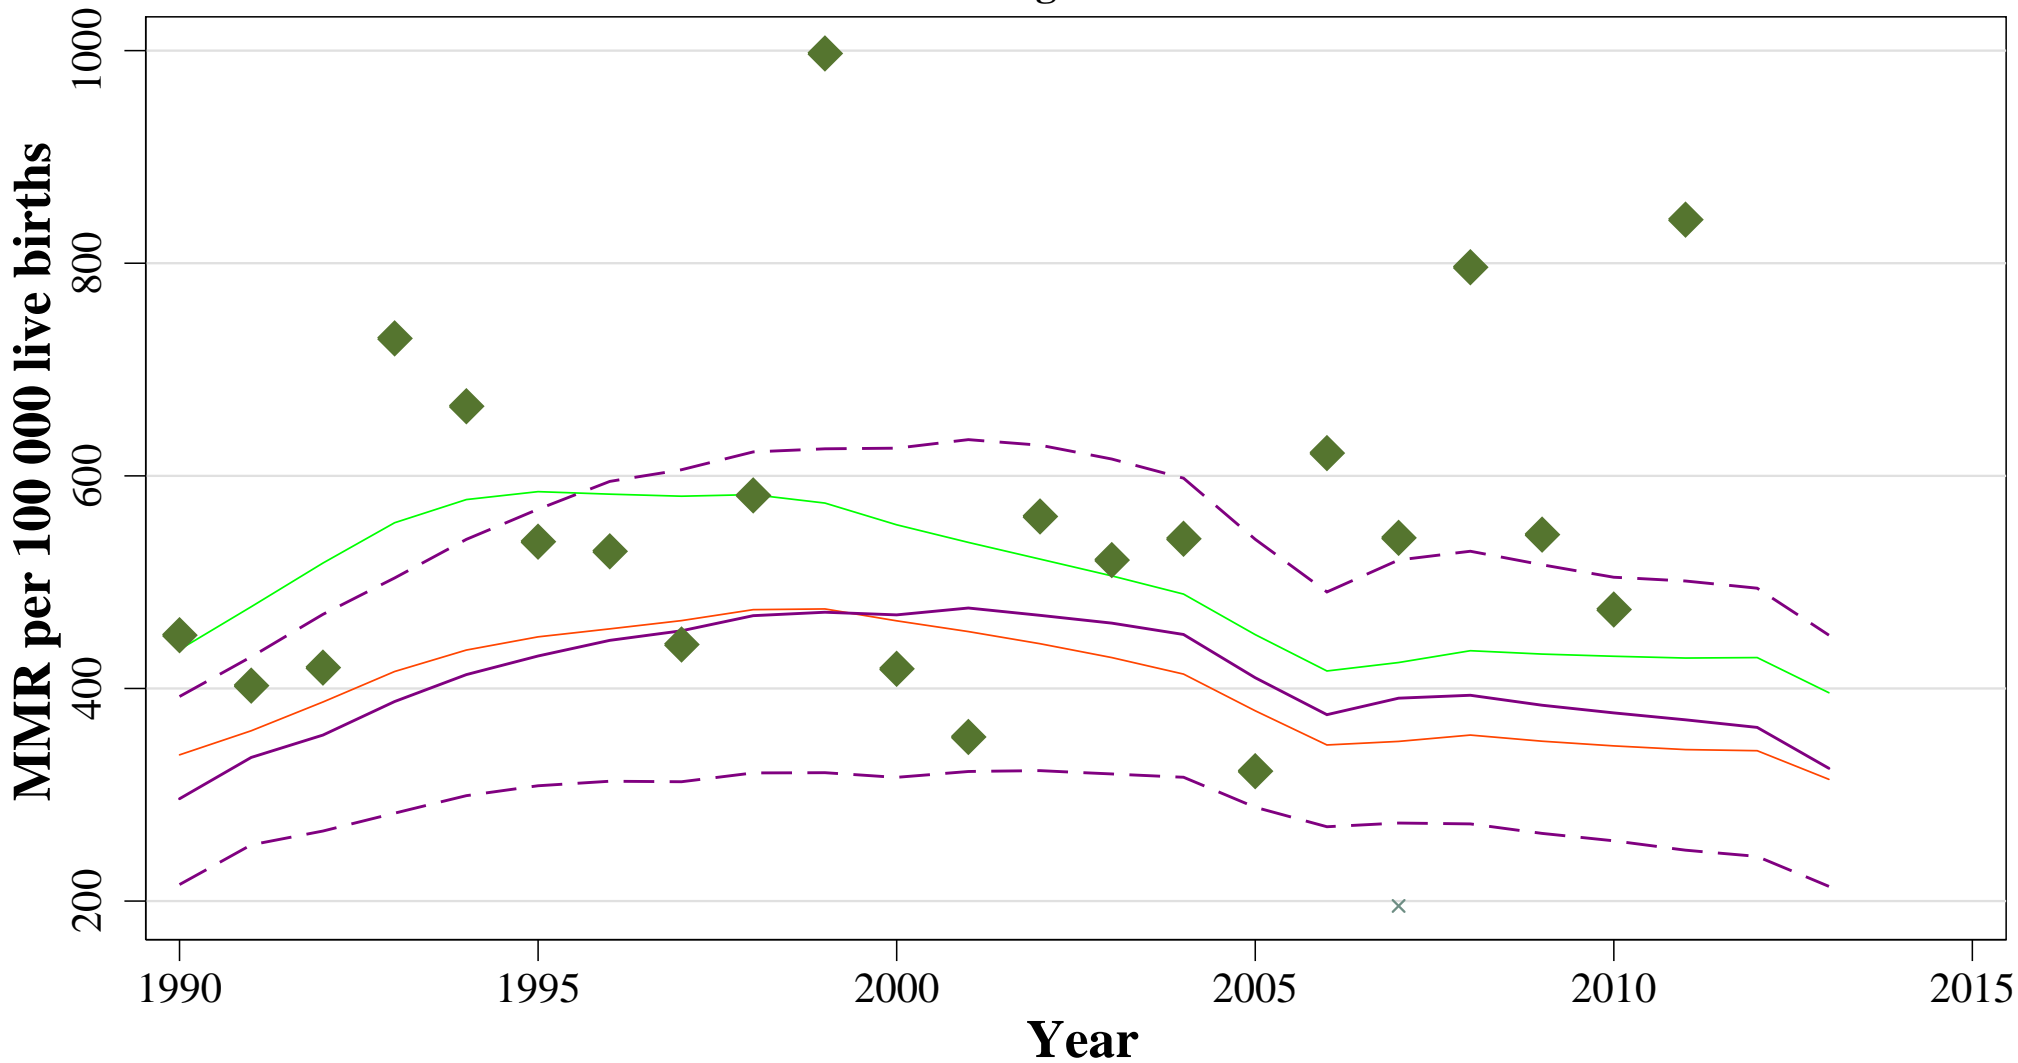

# Ukraine

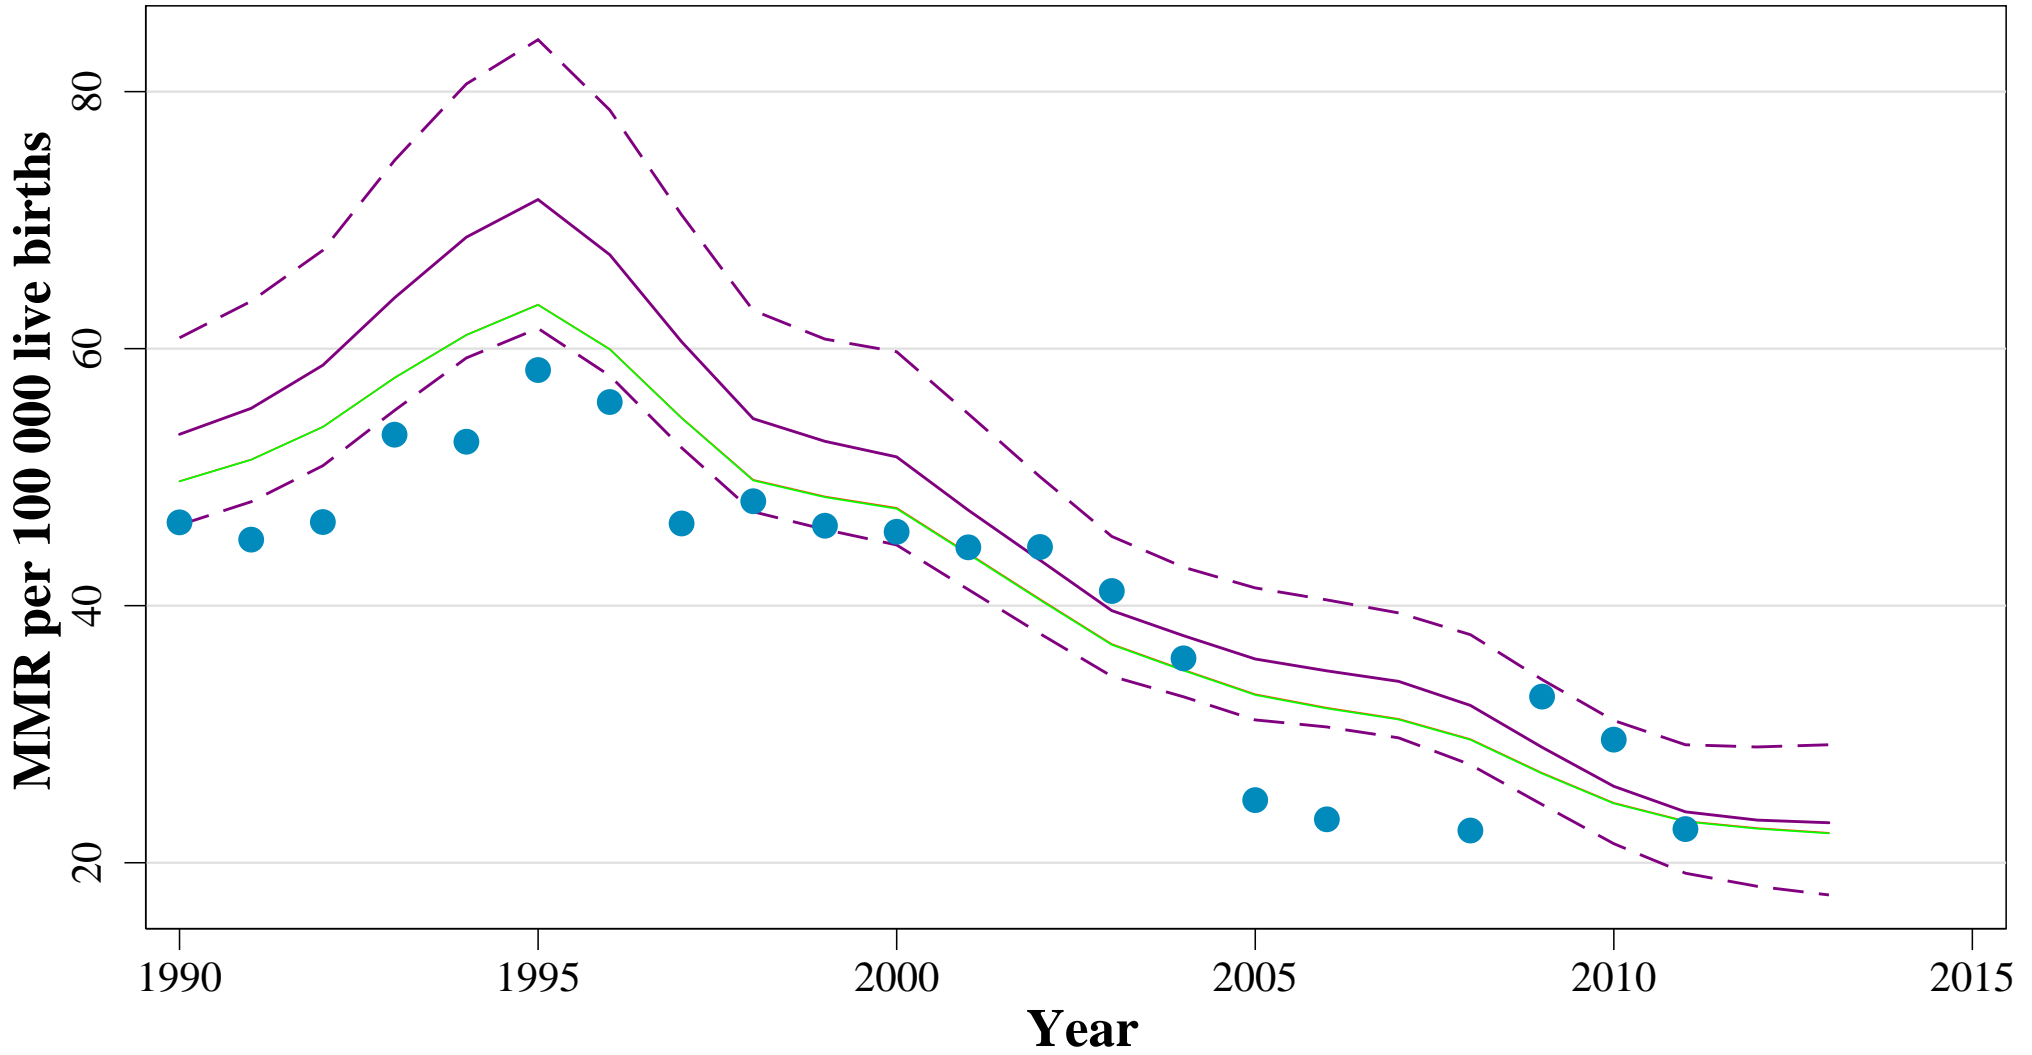



# United Arab Emirates

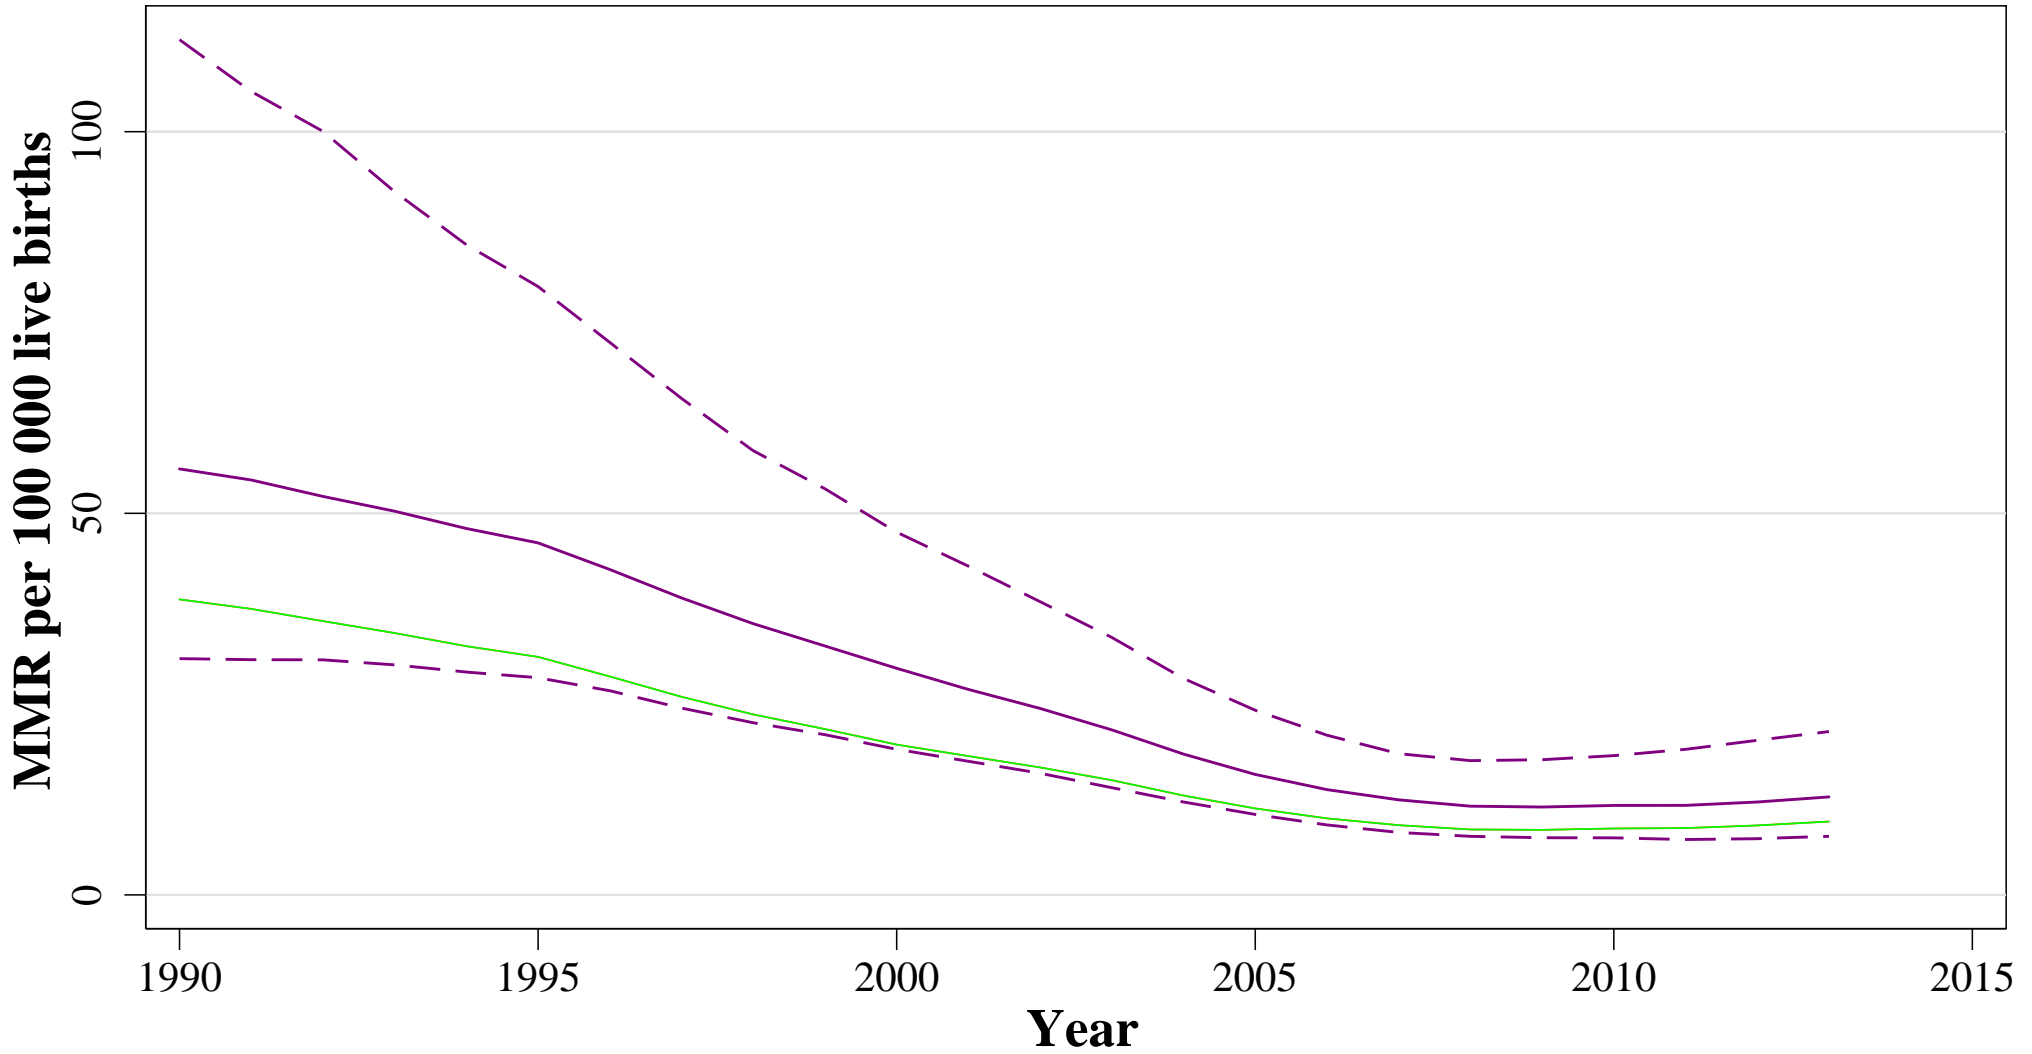

# United Kingdom

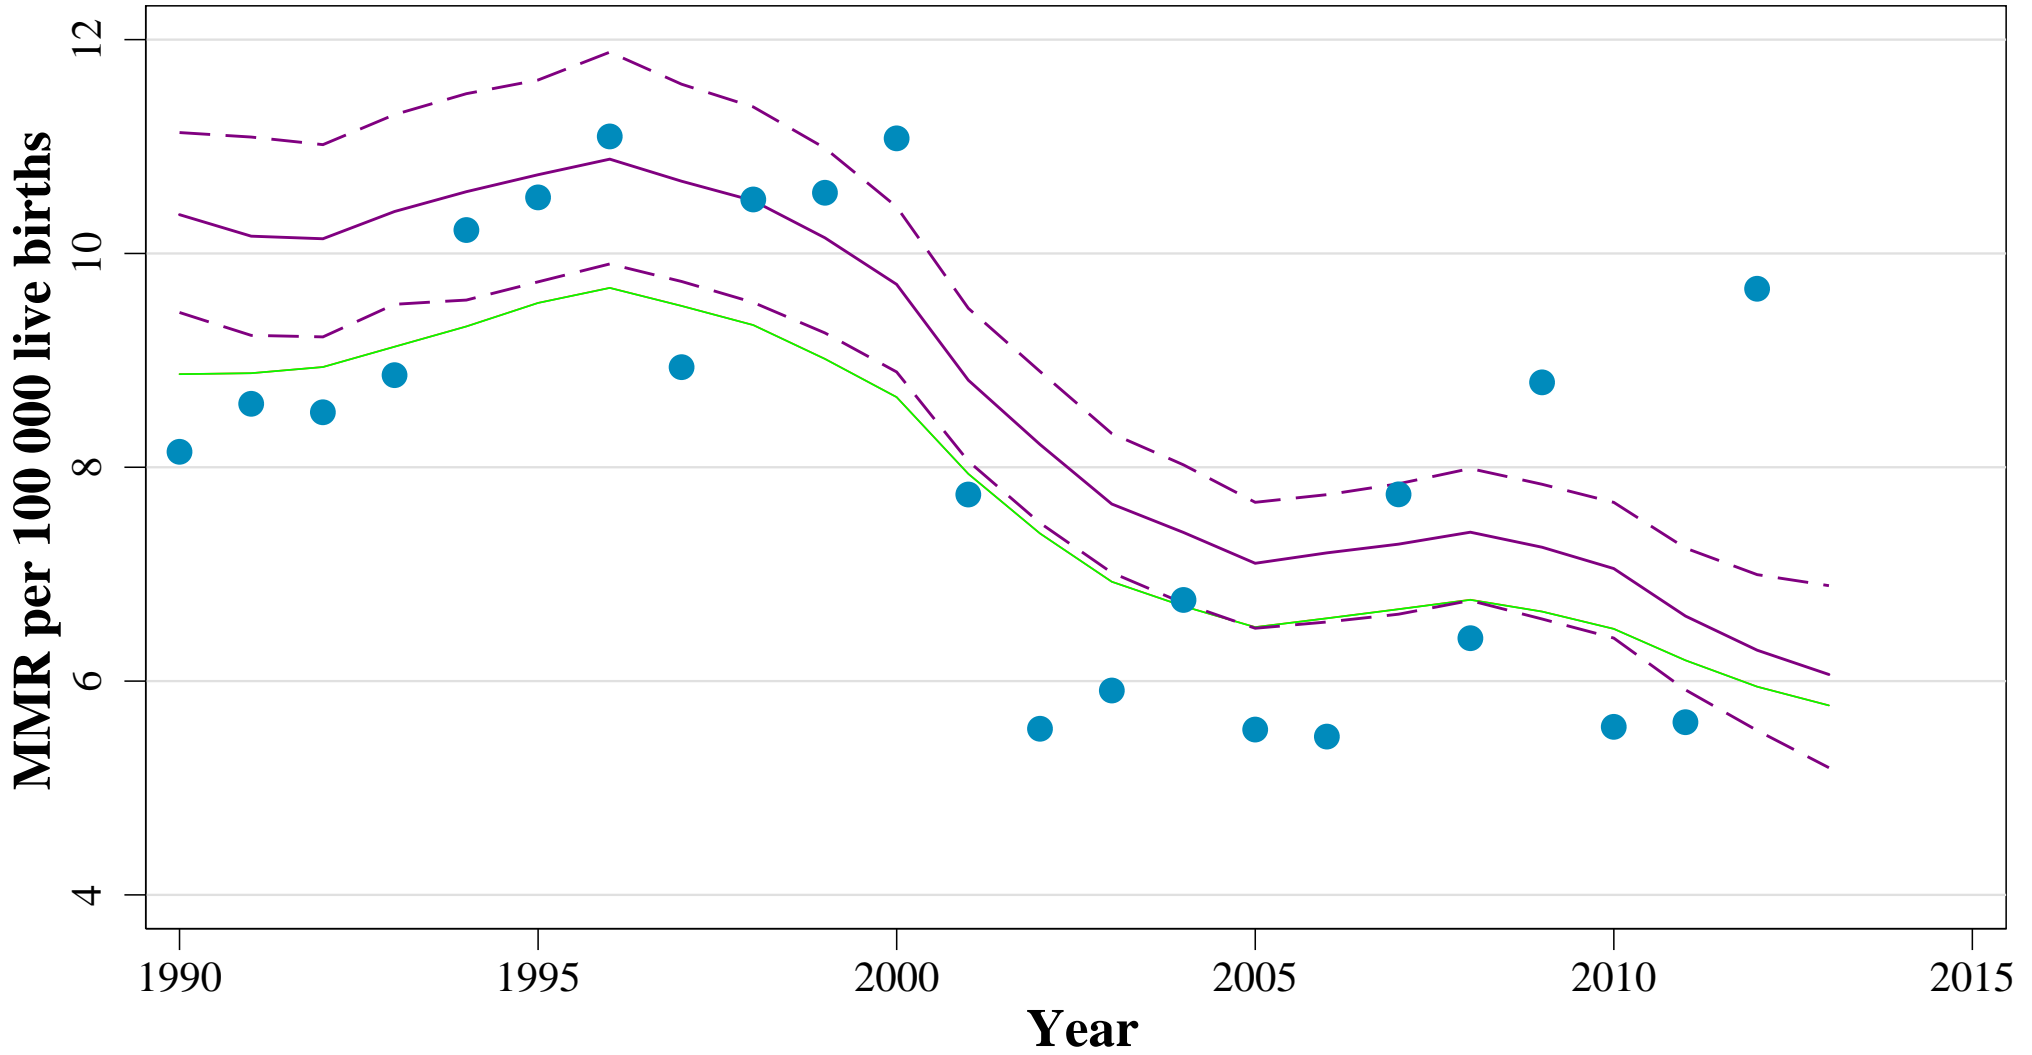

# United States

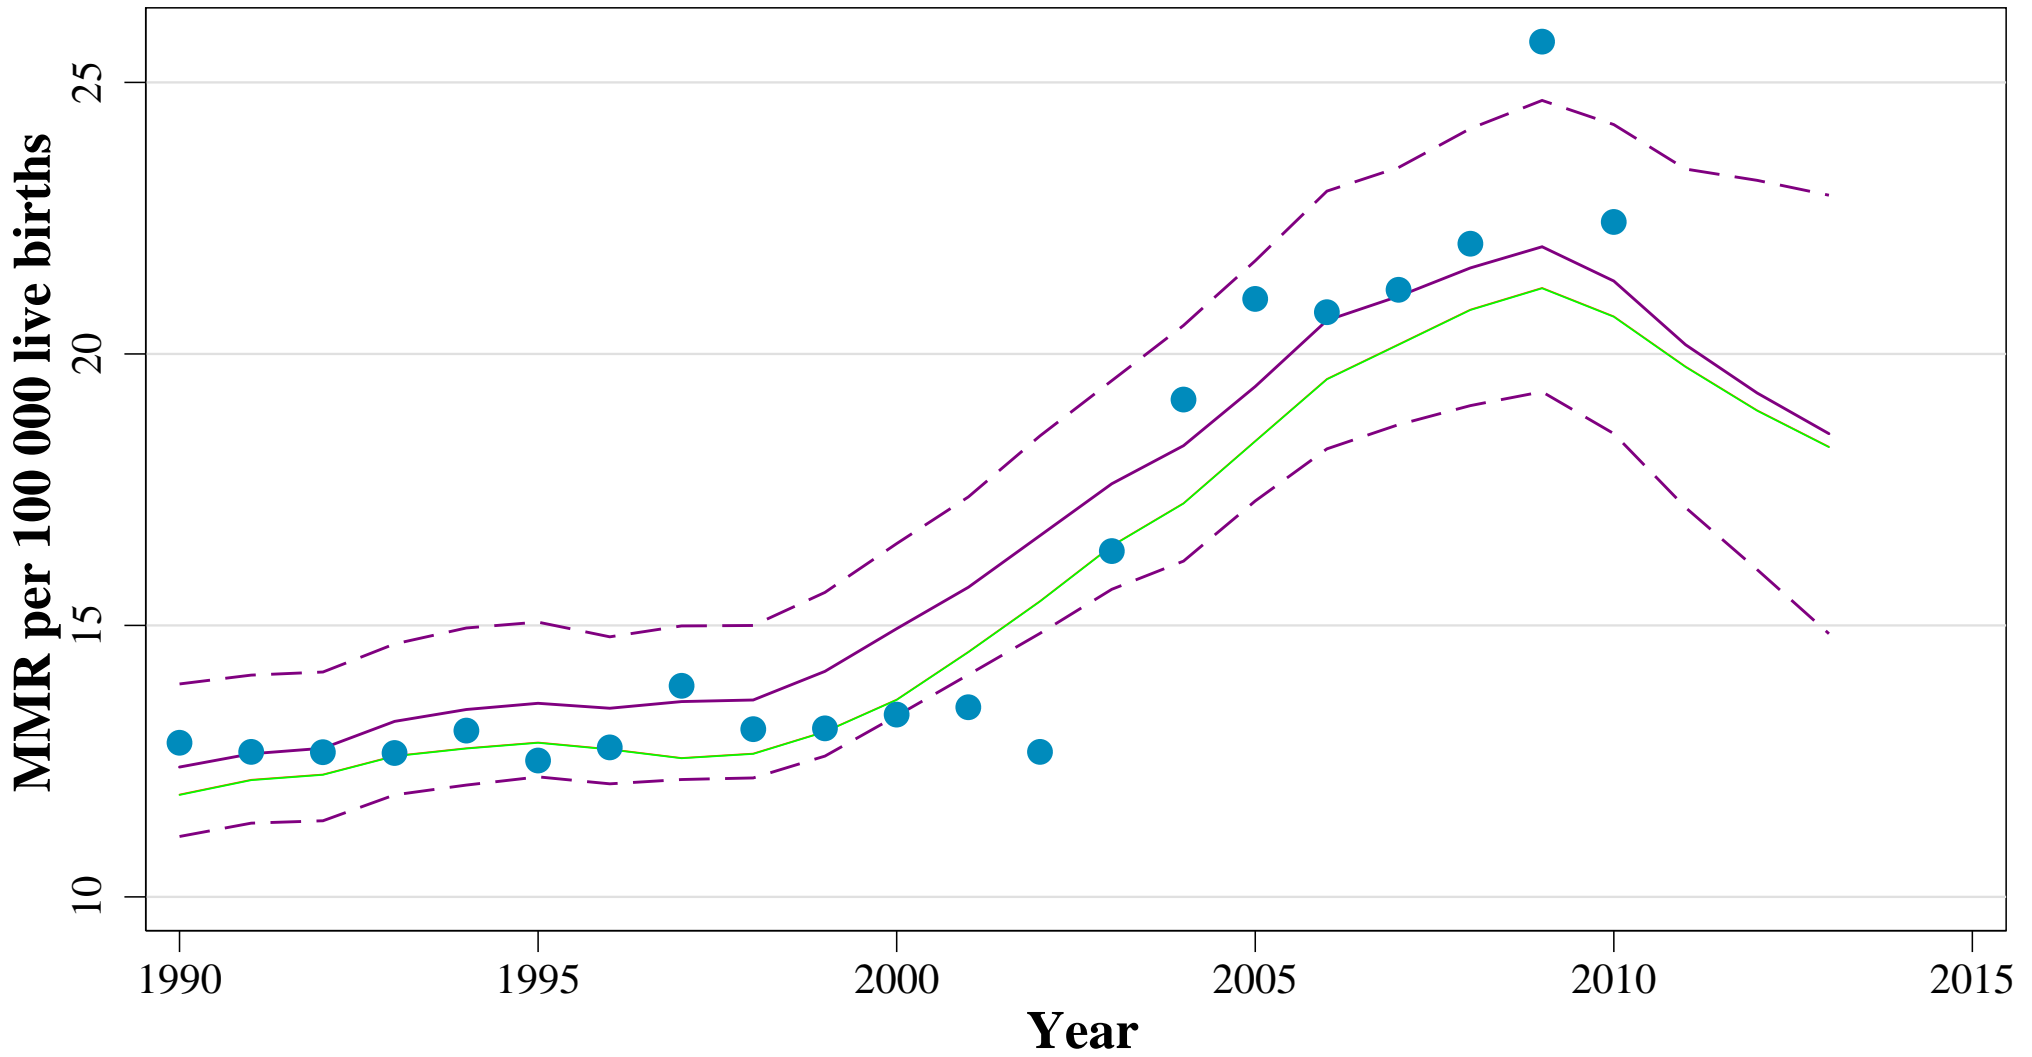

# Uruguay

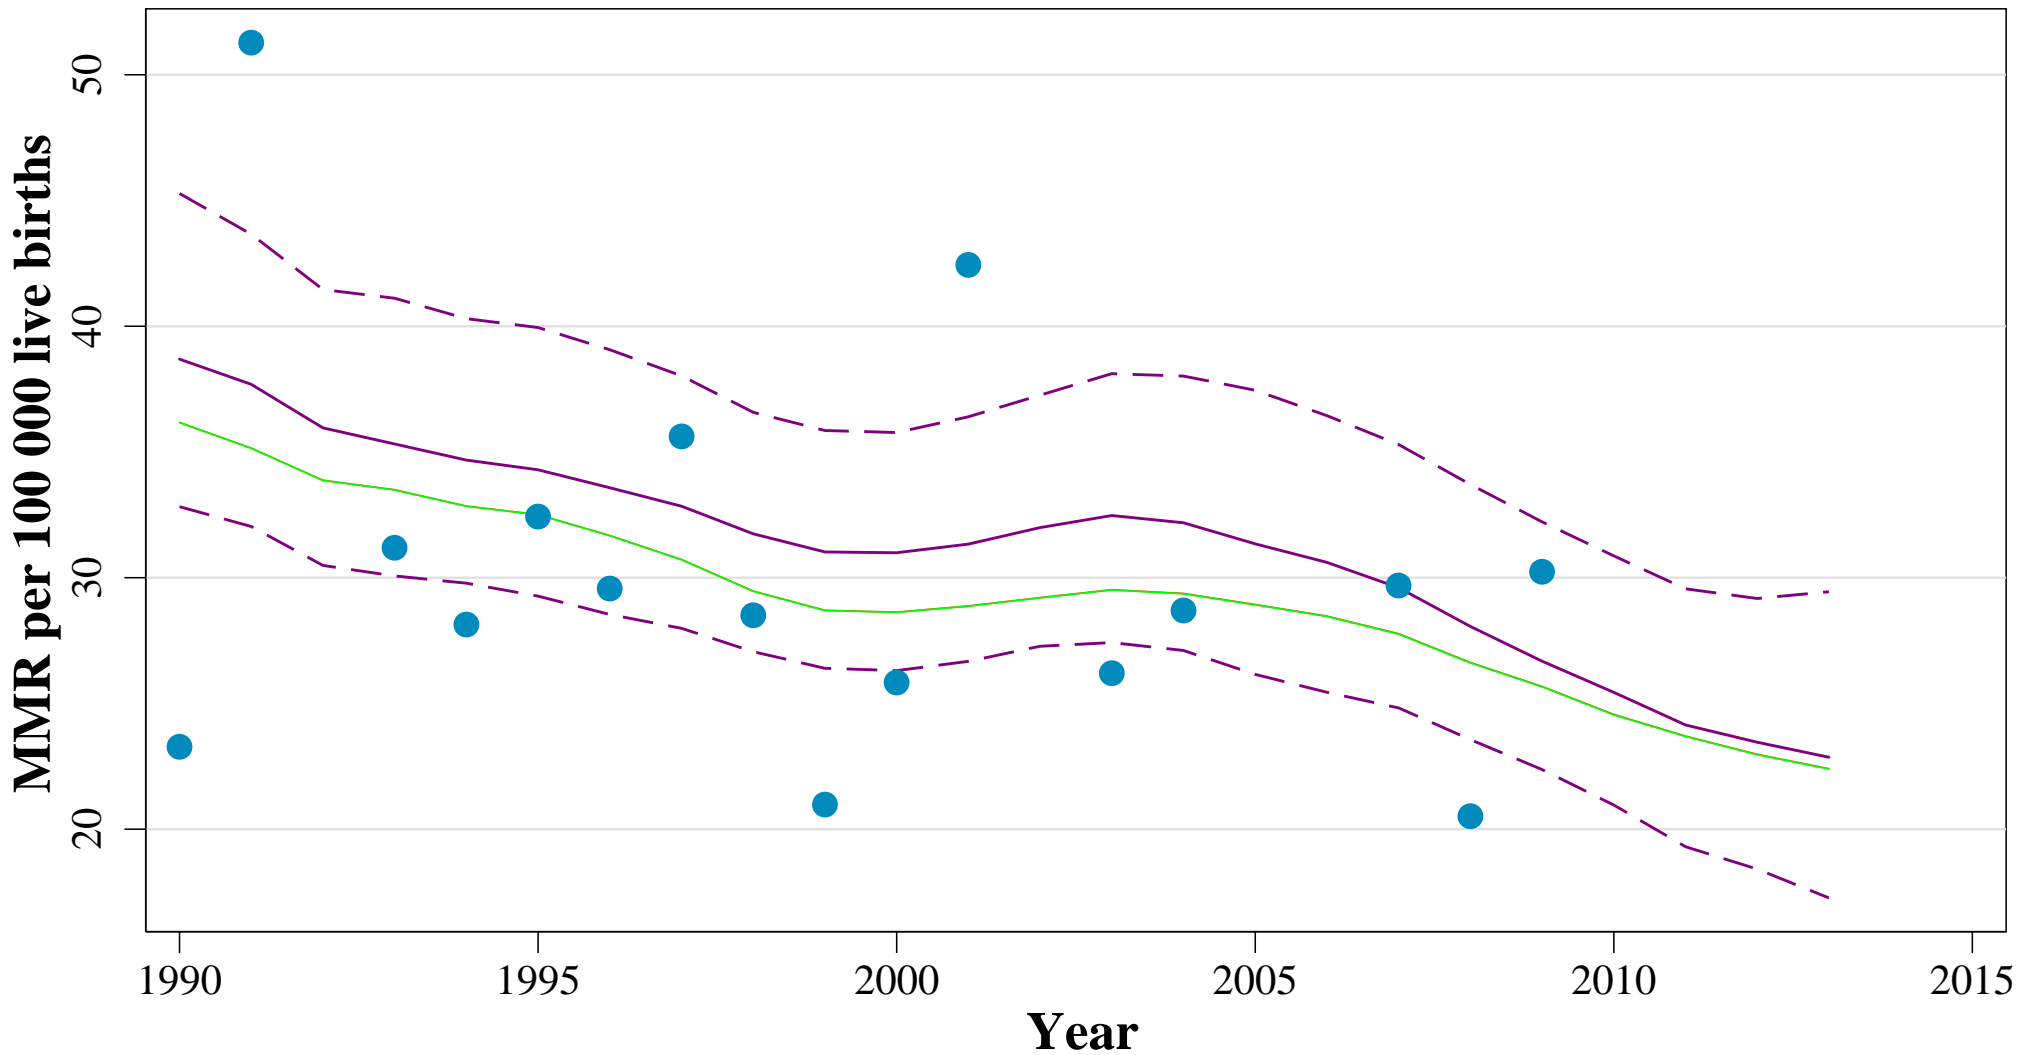

# Uzbekistan

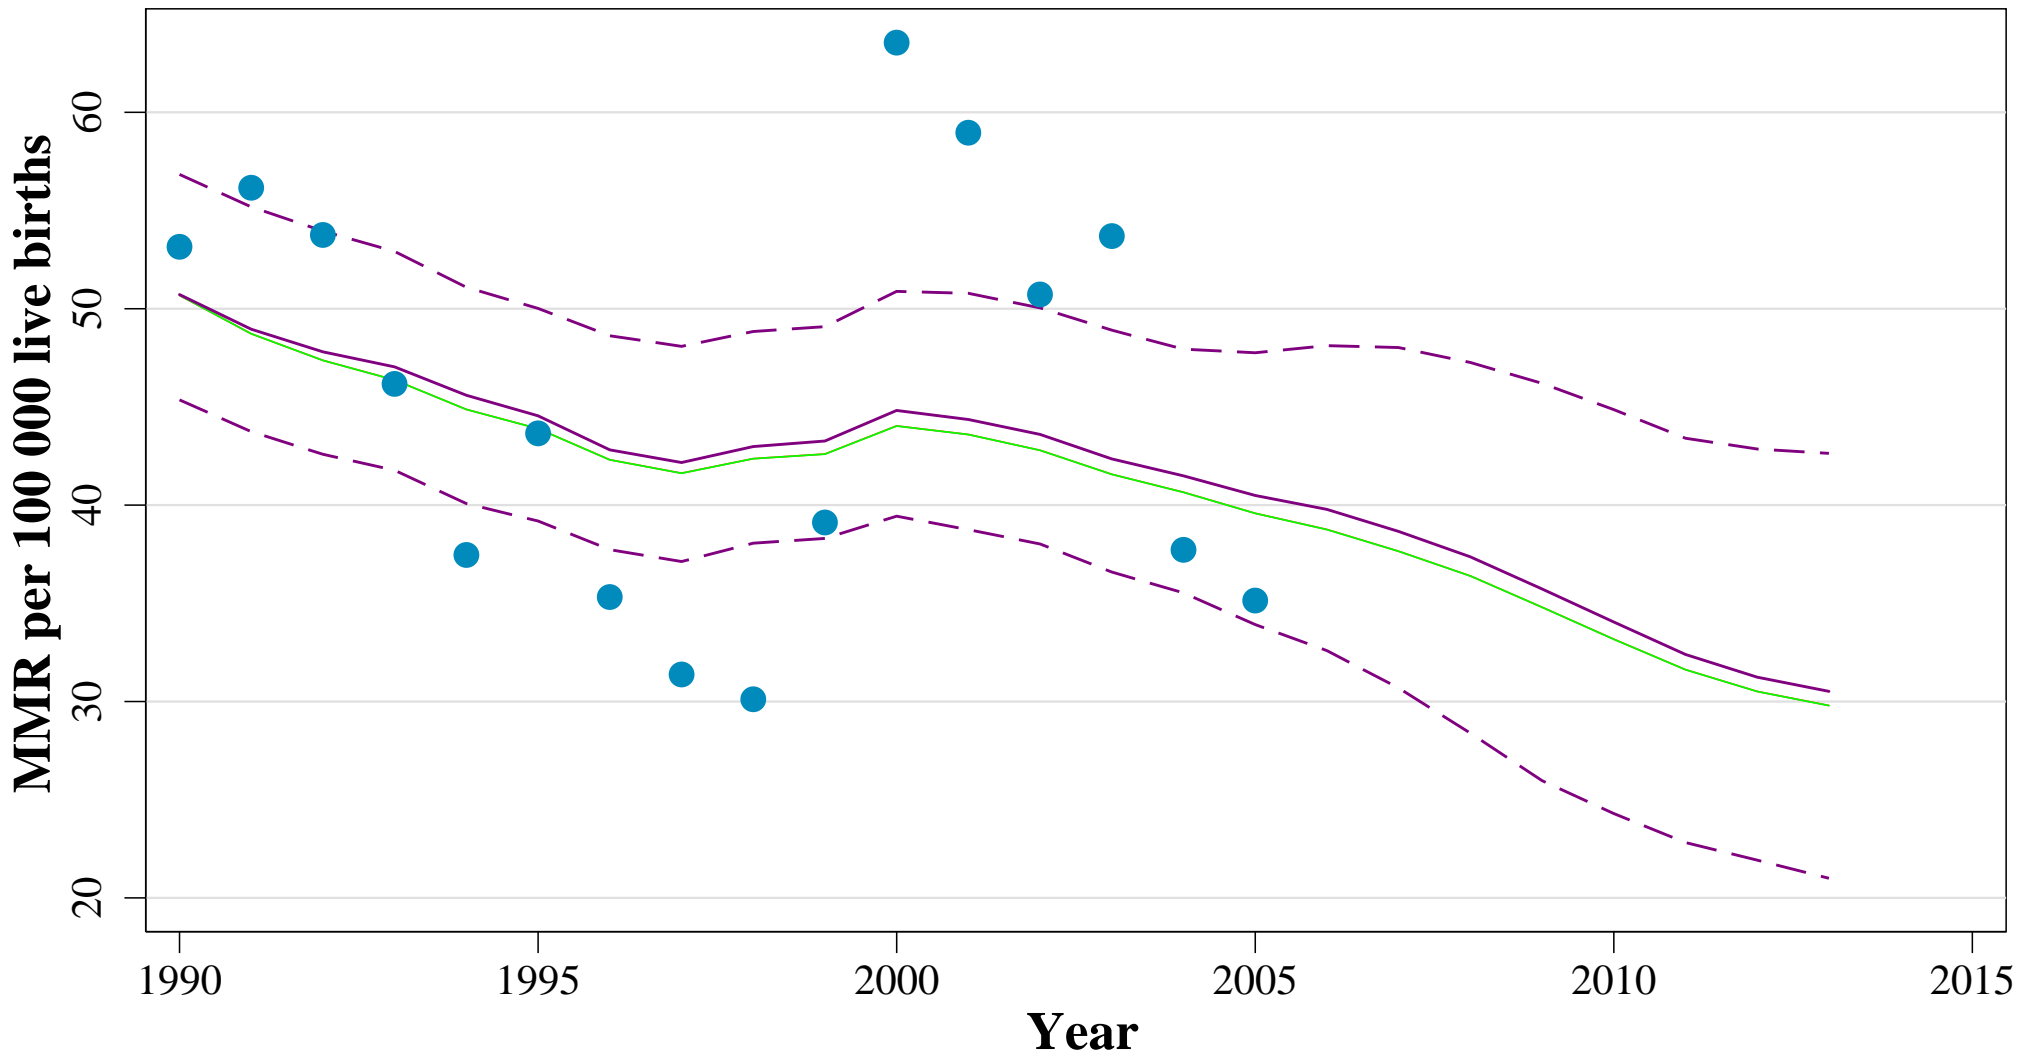

# Vanuatu

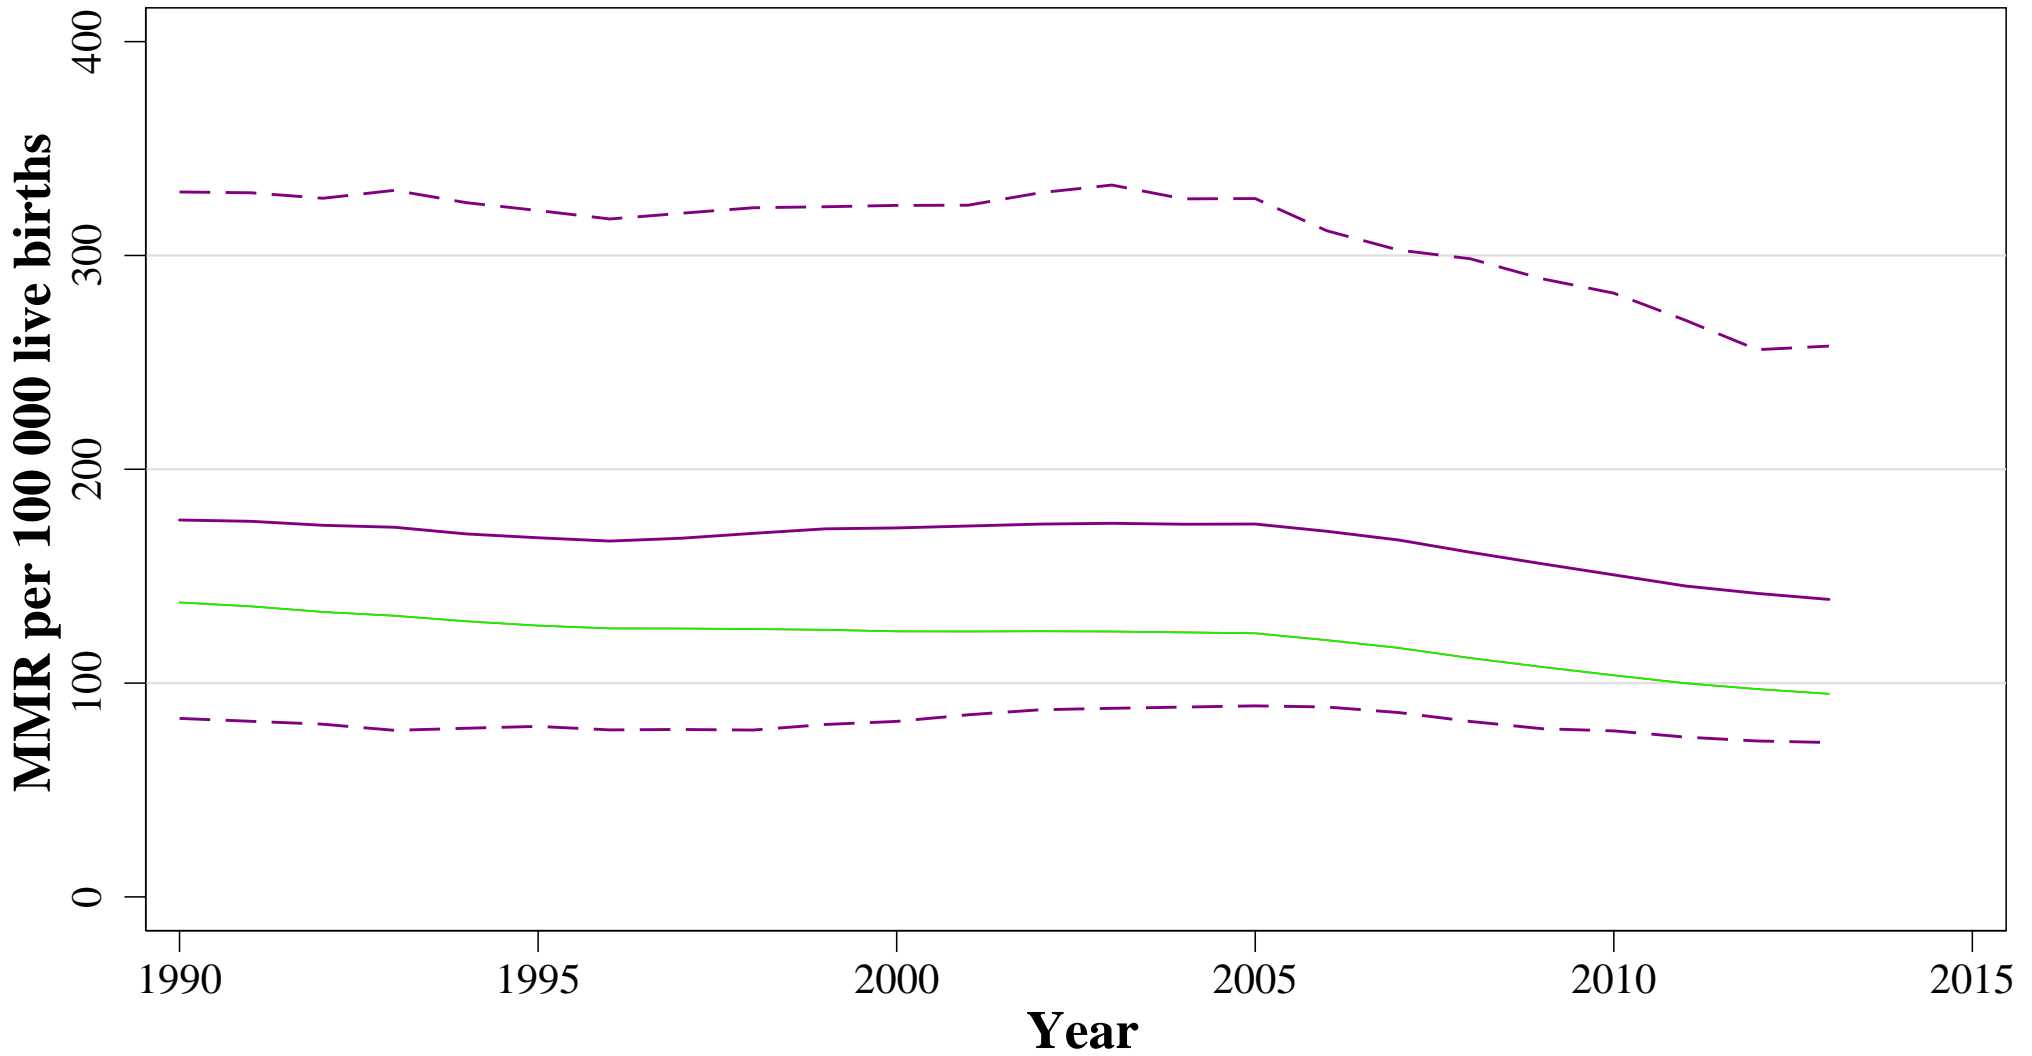

# Venezuela

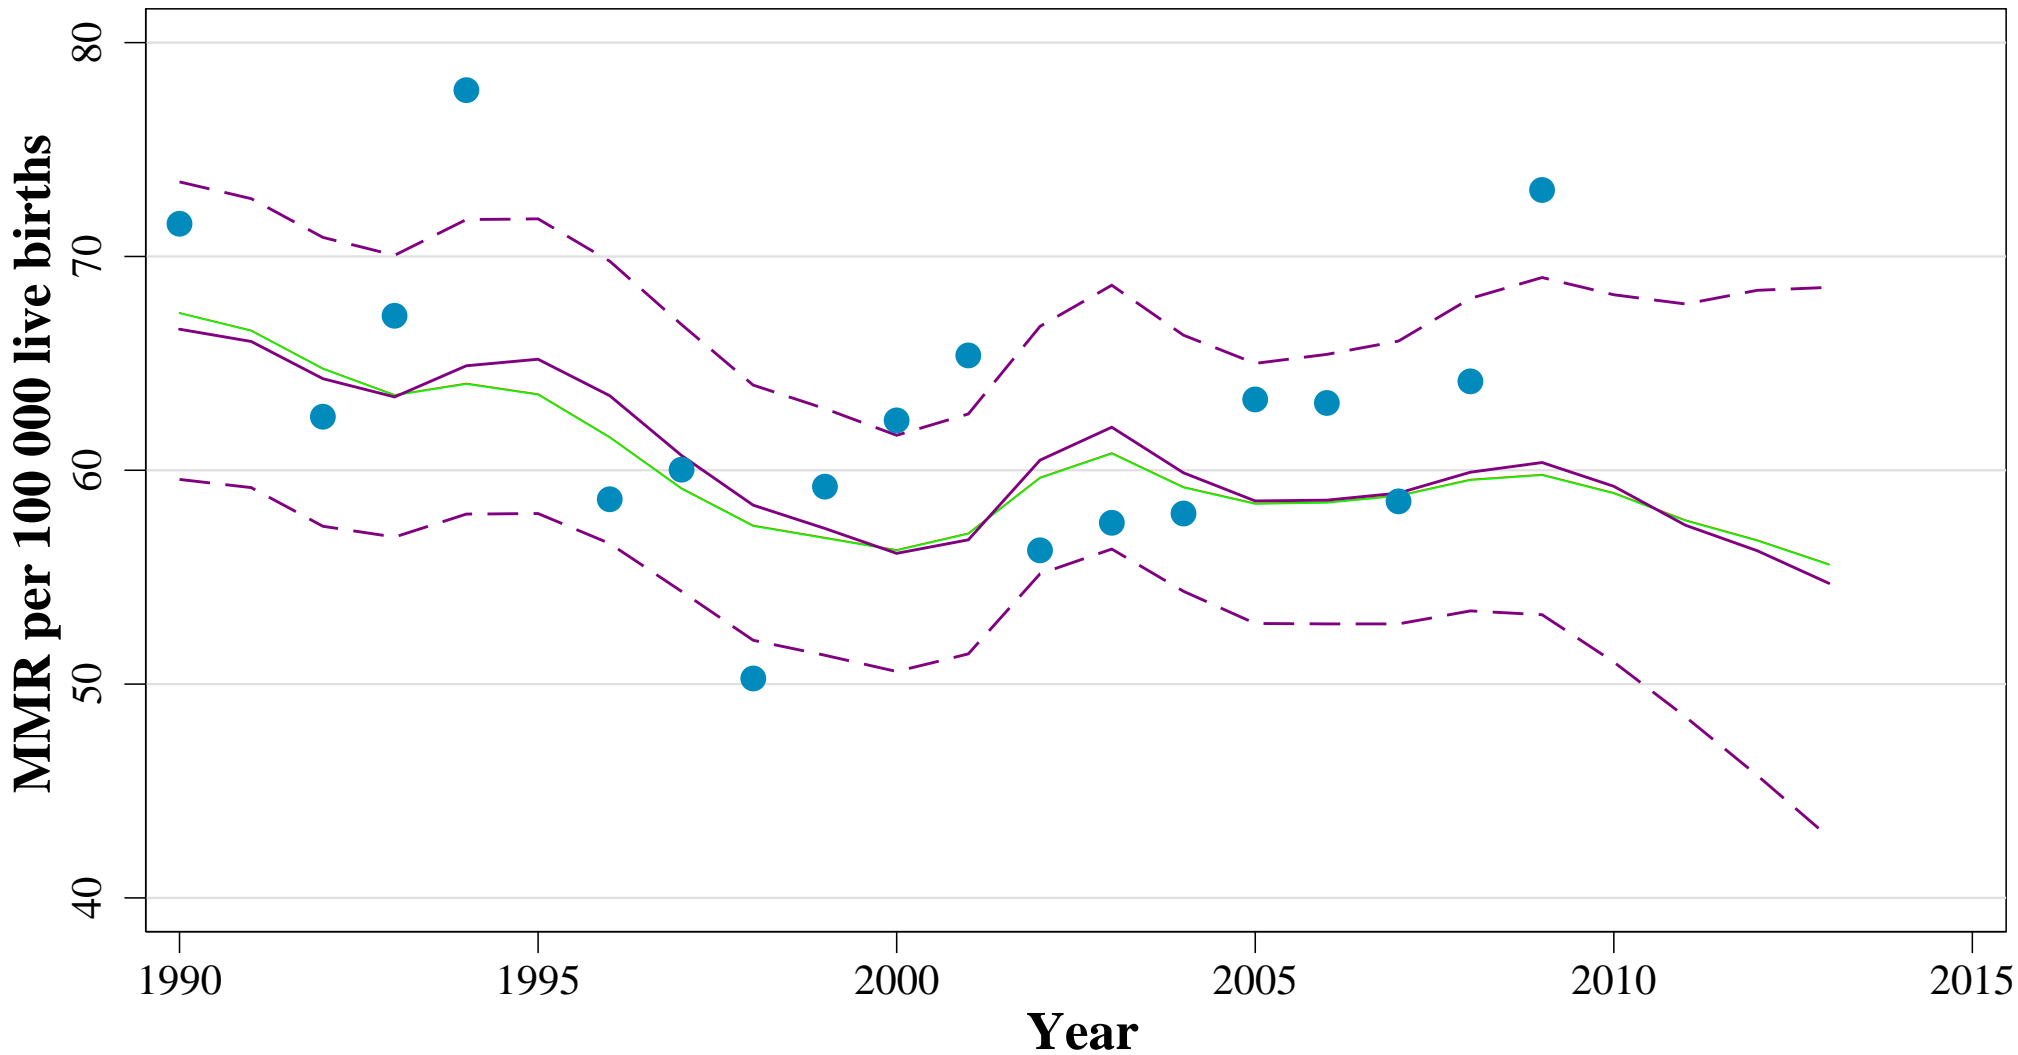

# Vietnam

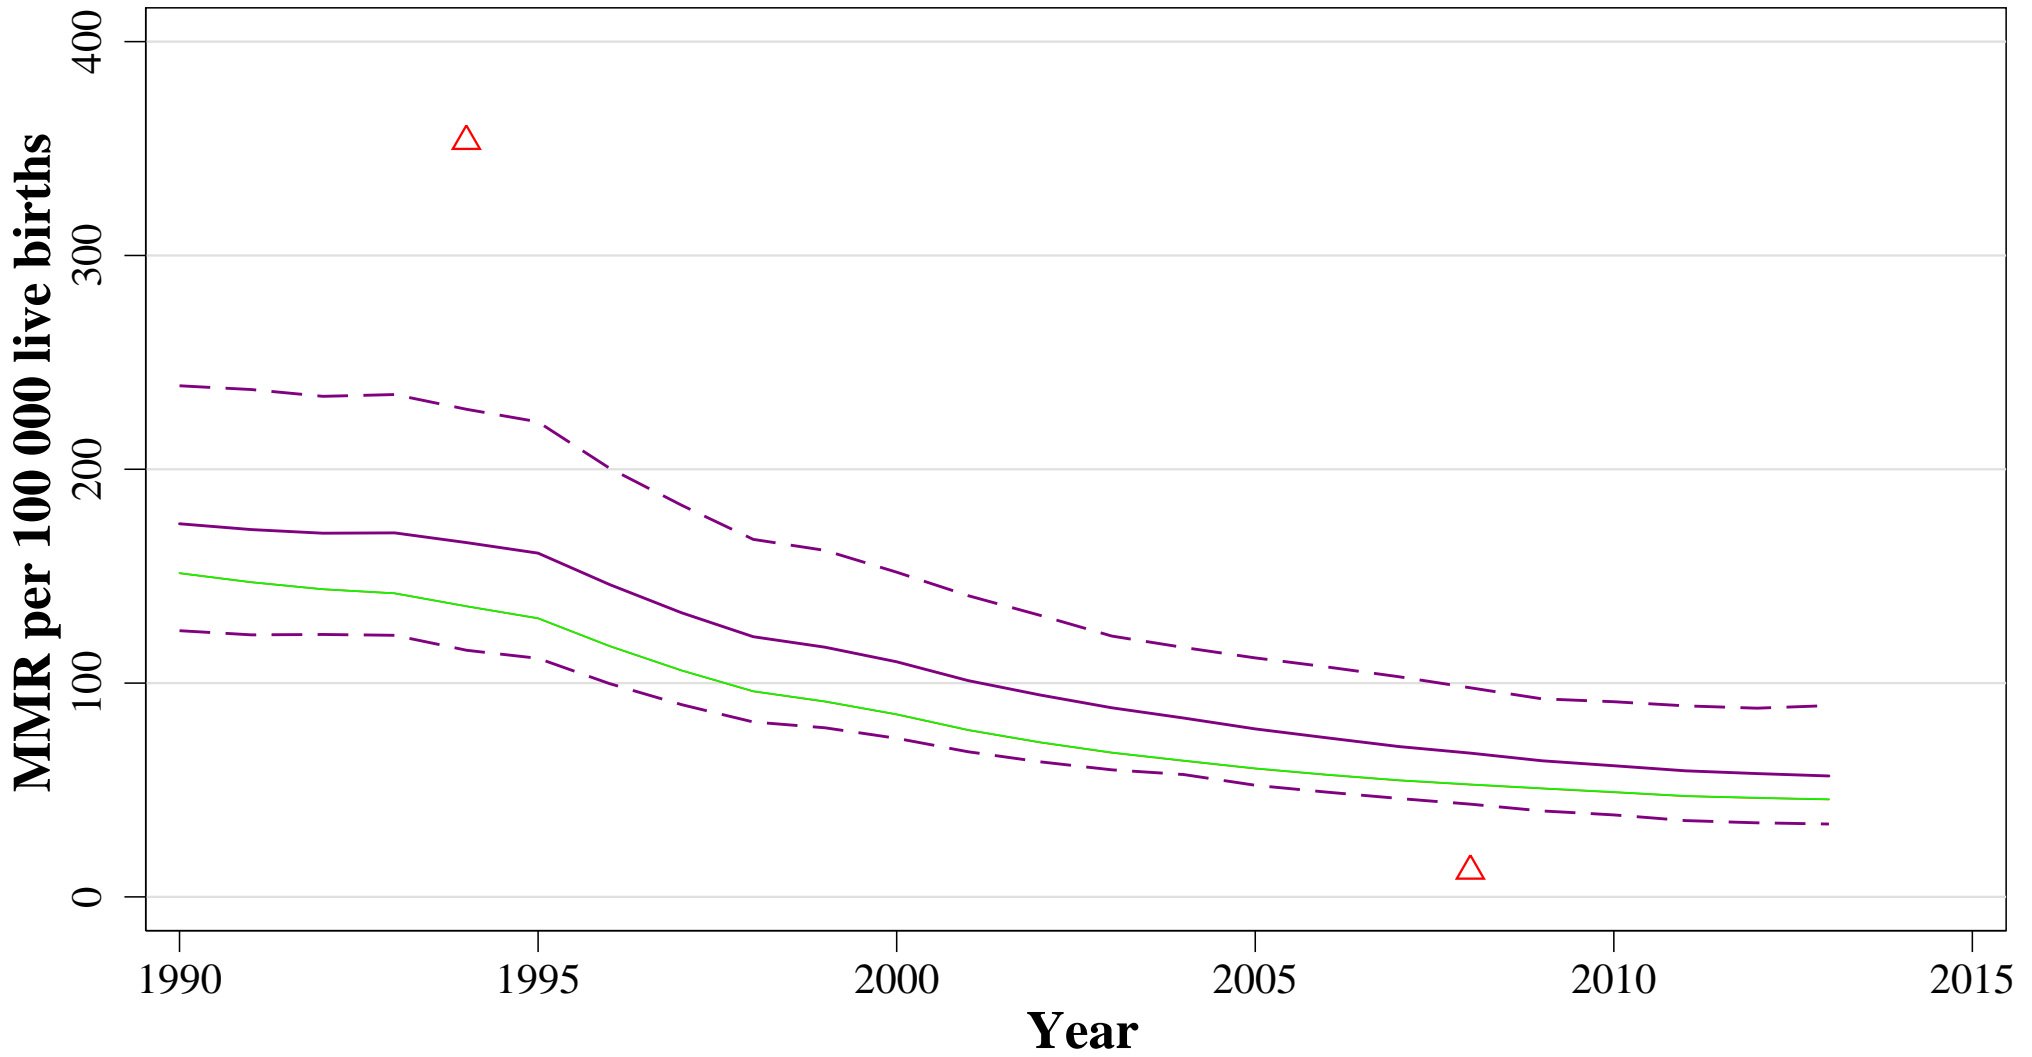



# Yemen

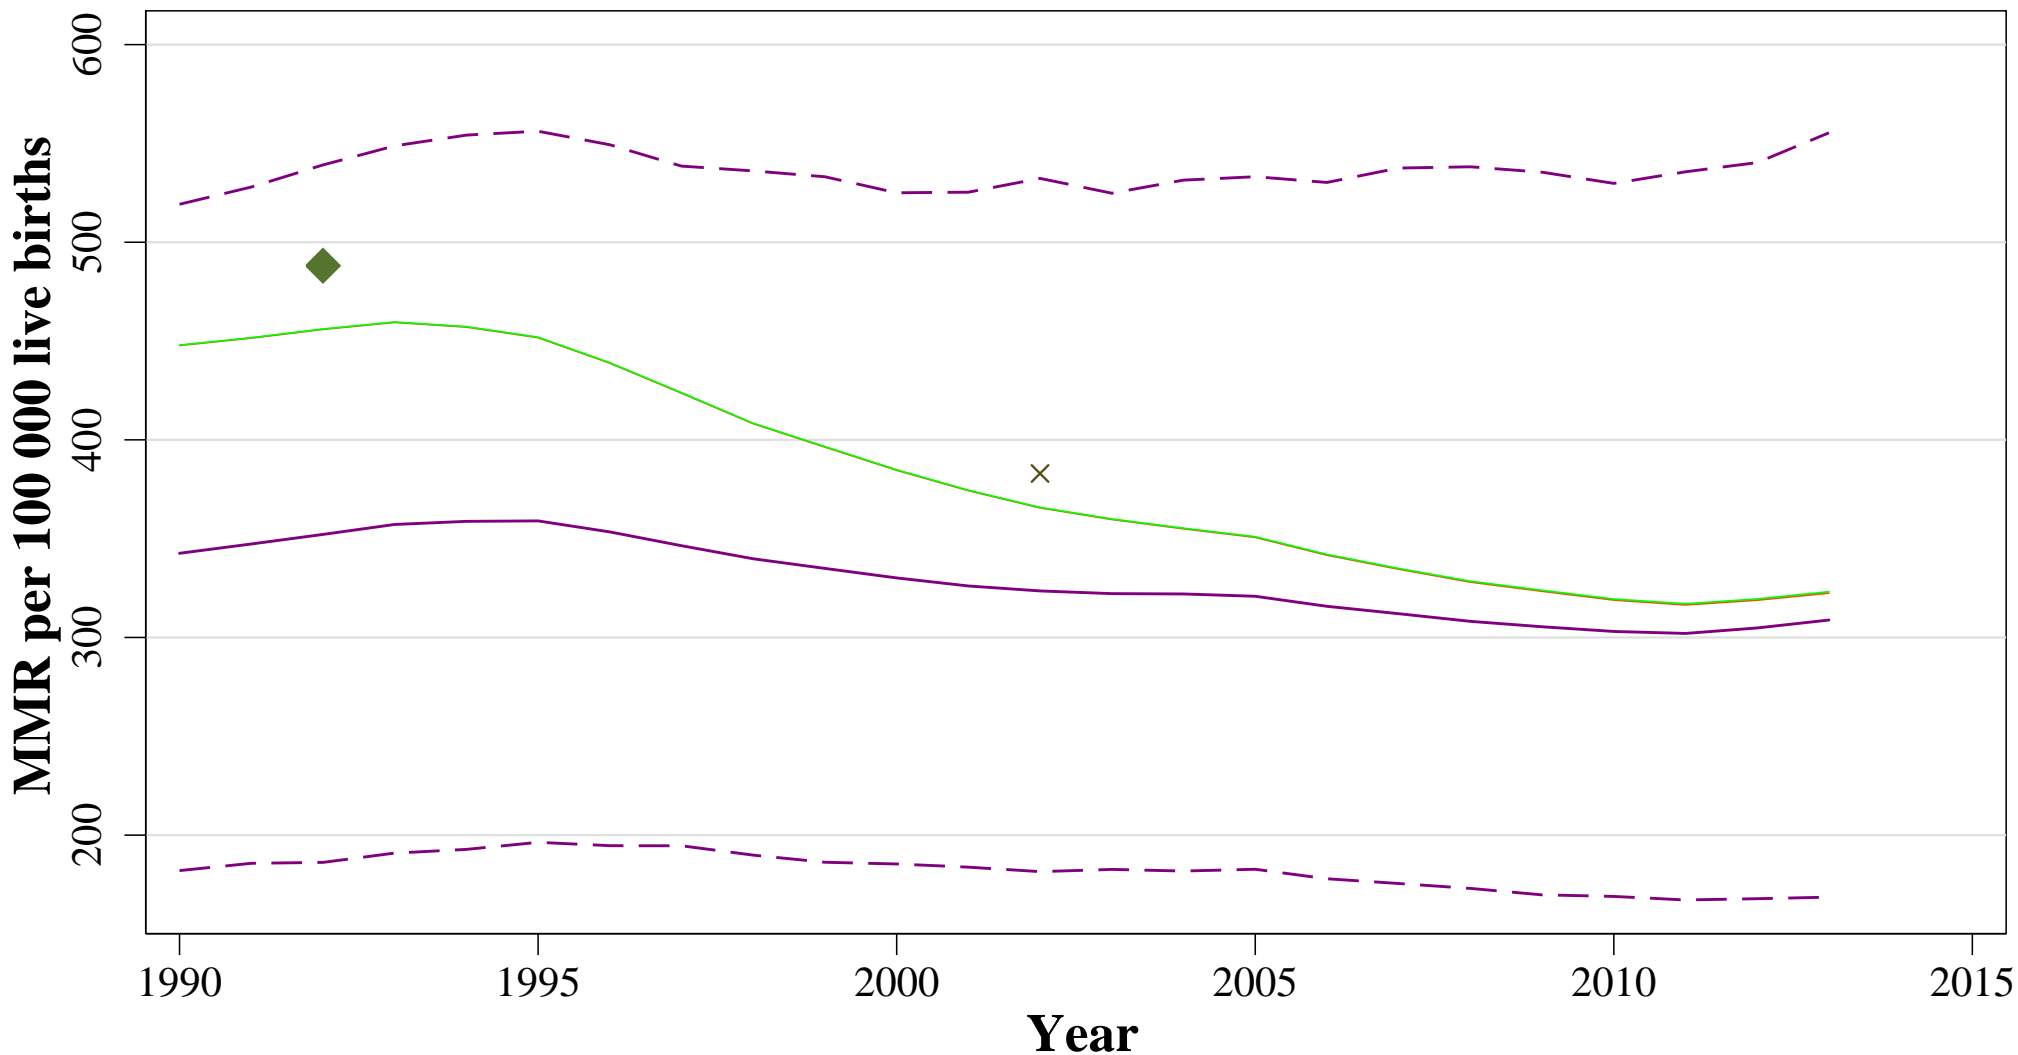

# Zambia

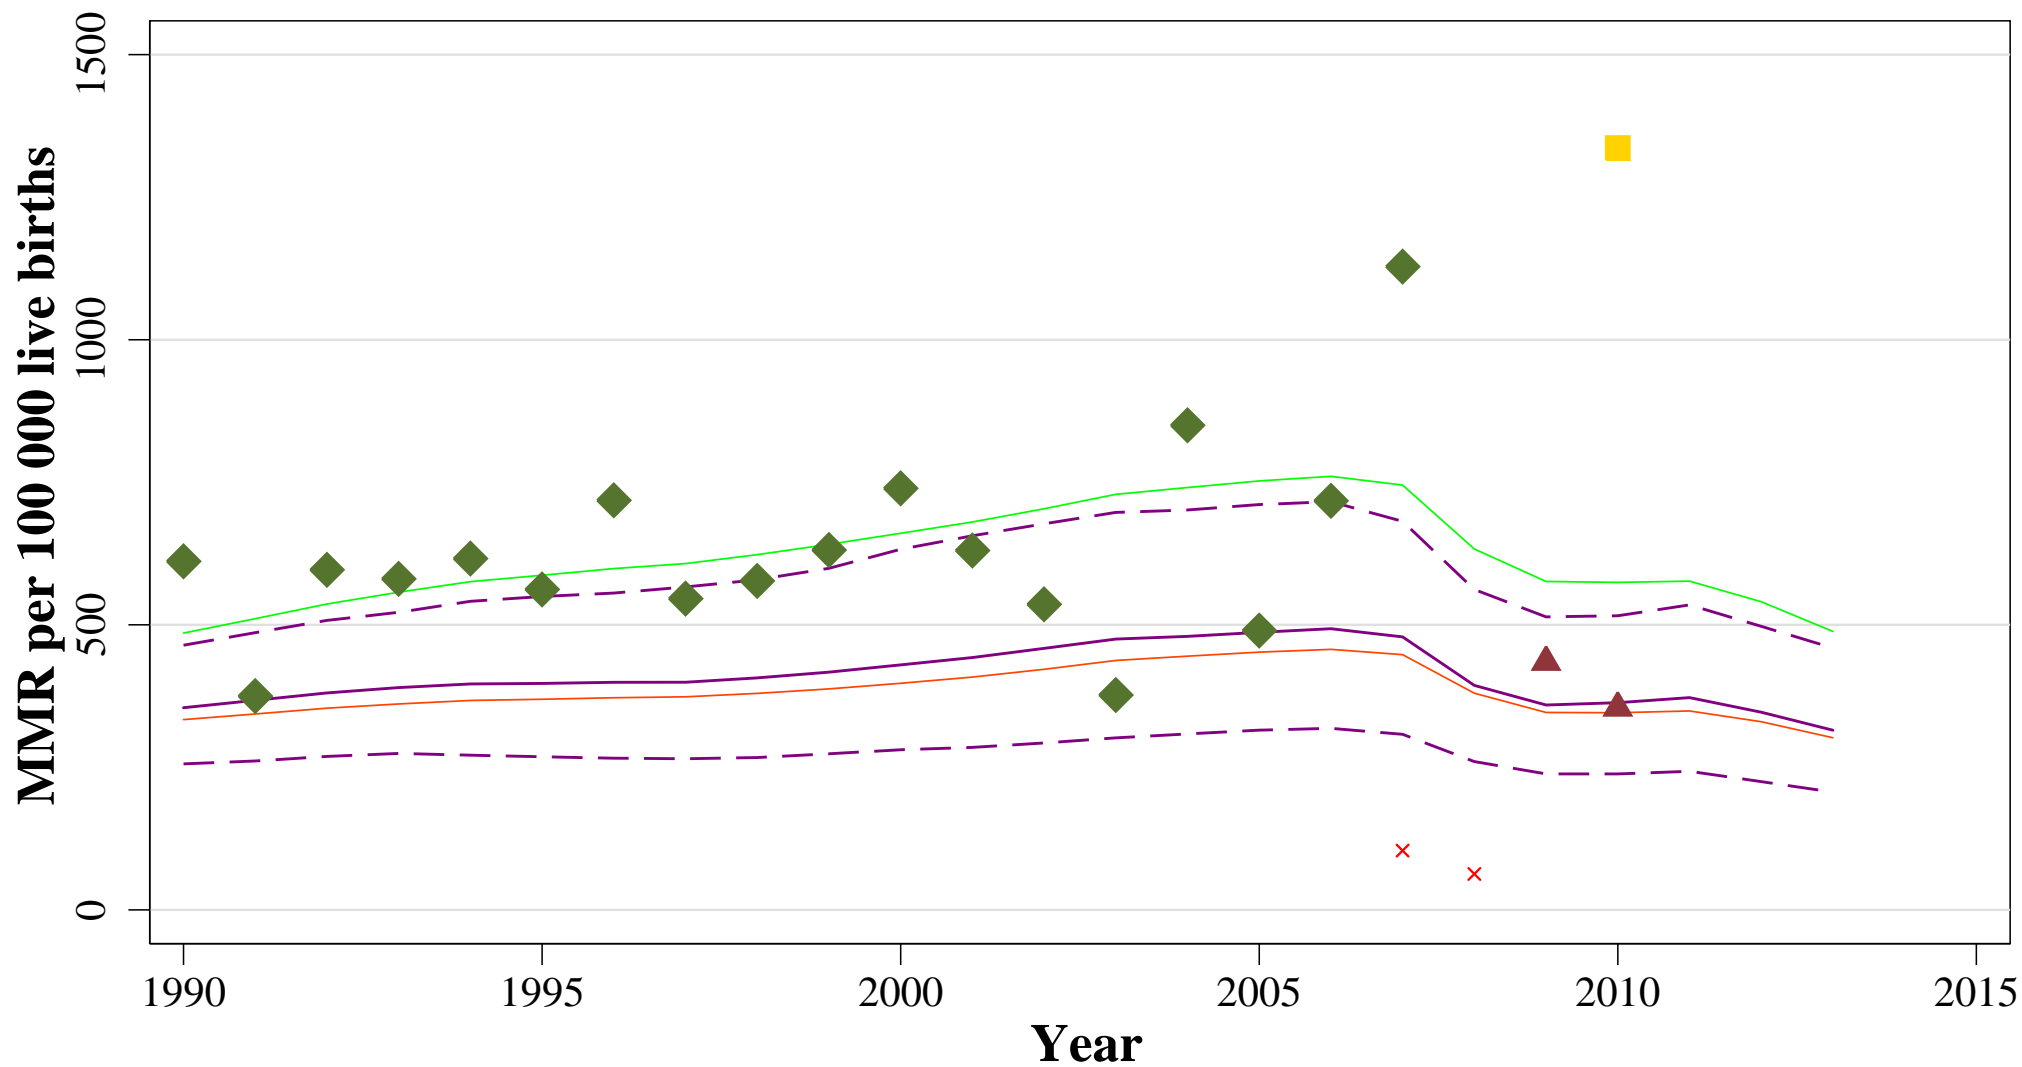

# Zimbabwe

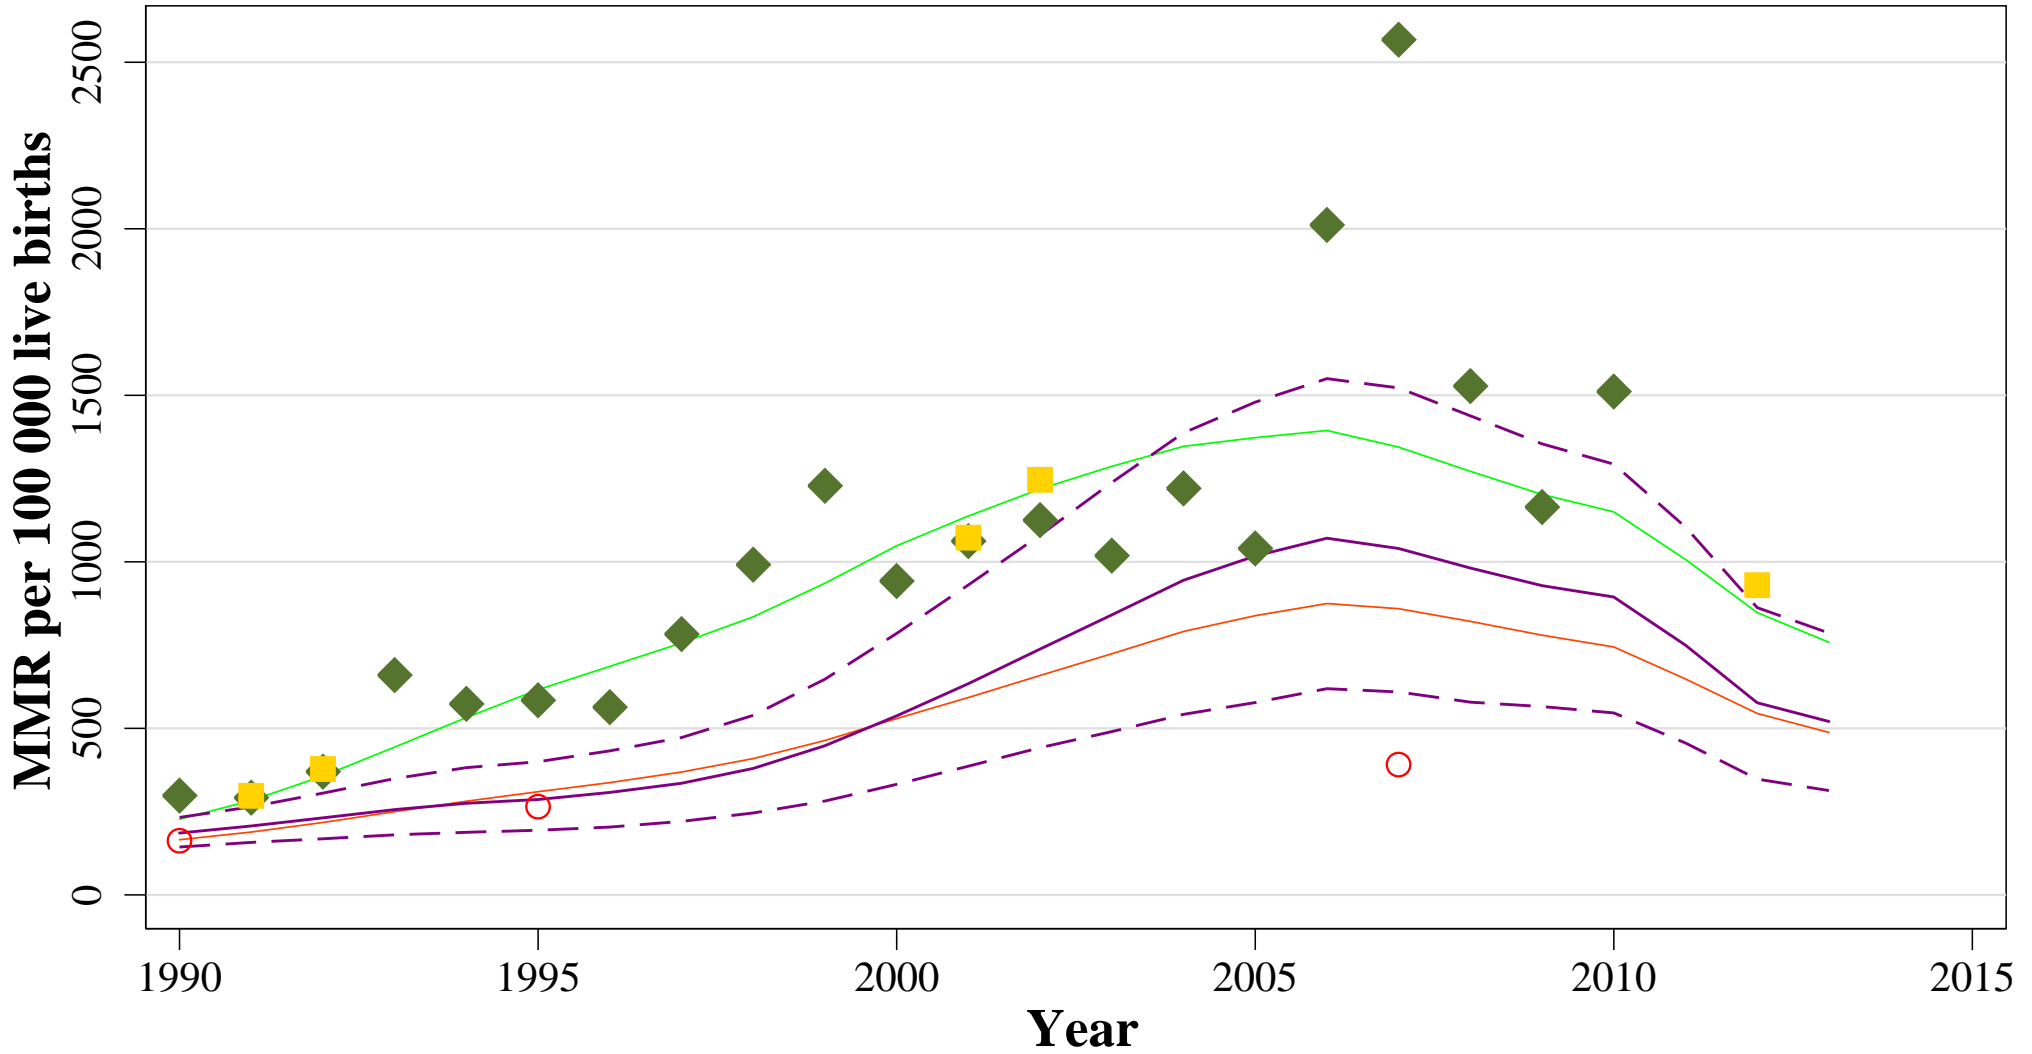

Supplement: NIHMS60028-supplement-Supplementary.pdf [file NIHMS60028-supplement-Supplementary.pdf]
